# Supplementary material for: Pharmacologic activation of integrated stress response kinases inhibits pathologic mitochondrial fragmentation
Source: eLife. 2025 Feb 12;13:RP100541. doi: 10.7554/eLife.100541 (PMC11820110; doi:10.7554/eLife.100541)
Supplement: Figure 1—figure supplement 1—source data 1. [file elife-100541-fig1-figsupp1-data1.xlsx]

## Sheet: Figure 1-figure supplement 1B
Veh	Tg	OA
1.09952	2.04015	1.73904
0.970082	1.98287	2.148
0.960389	2.35504	1.89795
1.00439	2.34106	1.66995
1.05982	2.33186	1.53567
0.905804	2.00487	1.97304
1.0404	2.31062	2.07047
1.03651	2.16784	2.20553
1.01374	2.35601	1.6925
0.992637	2.28458	2.12765
1.09723	2.04219	2.27437
0.819483	2.4575	2.23204
1.01842	2.47904	2.26708
1.0954	2.78002	2.33925
0.930636	2.77507	2.36913
1.02037	2.61584	2.37002
0.941118	2.1361	2.58126
0.994066	2.7924	2.75191

## Sheet: Figure 1-figure supplement 1C
	0429									3610									0357									1204									0250									0523
20	1.56166	1.84253	1.84331	1.97698	1.99203	1.88155				2.43632	2.04761	2.60442	2.58503	2.40175	2.7128	3.04768	2.95053	2.61982	1.84831	2.66568	2.14377	2.33536	2.61714	2.302	3.66292	3.41608	3.03737	2.66543	2.16576	2.57647	2.49122	2.32522	2.54531	3.46167	3.24281	2.97368	1.20107	1.31084	1.06716	1.16328	1.3153	1.18922	1.05369	1.10728	0.995447	2.04857	1.33133	2.36286	1.93435
10	1.44411	1.76919	1.32031	1.76162	1.74992	1.87639	1.90083	2.11834	1.94904	2.31751	2.36081	1.97276	2.15657	2.23511	2.15521	1.82203	1.7505	1.77914	2.16451	1.5738	1.59949	2.28702	1.99351	2.03782	1.79317	1.85842	1.72134	1.63744	2.33816	1.89226	1.98955	1.95769	1.74685	2.04053	1.95501	1.75966	1.22924	1.31535	1.21894	1.34686	1.14764	1.29397	1.04412	1.03855	0.962954	1.56883	1.27462	1.48064	1.71757
5	1.4124	1.29378	1.36963	1.52063	1.36042	1.28086	1.35272	1.38786	1.30758	1.60731	1.59451	1.76736	1.46016	1.33855	1.56487	1.34845	1.48323	1.44084	1.59109	1.32862	1.58298	1.6182	1.45175	1.31819	1.48831	1.39574	1.35477	1.56081	1.66621	1.6017	1.47352	1.54801	1.45827	1.56423	1.52084	1.40423	1.26006	1.29594	1.28493	1.1669	1.21285	1.20415	1.20384	1.04347	1.10158	1.19753	1.40205	1.32832	1.35614
2.5	1.21044	1.254	1.3413	1.18235	1.37098	1.22464	1.51275	1.31091	1.30831	1.4394	1.29889	1.38125	1.47003	1.289	1.38954	1.35615	1.247	1.2469	1.3197	1.35692	1.26654	1.29518	1.3334	1.28813	1.27378	1.21605	1.14061	1.39511	1.28819	1.38843	1.33323	1.25258	1.33698	1.32139	1.35931	1.3226	1.22441	1.30797	1.35185	1.19034	1.20558	1.22523	1.15599	1.10143	1.10797	1.26225	1.46978	1.29608	1.39182
1.25	1.53813	1.21219	1.45057	1.21711	1.30128	1.23559	1.25335	1.24236	1.09233	1.36726	1.13789	1.37263	1.3281	1.35719	1.24752	1.2074	1.19017	1.2289	1.23609	1.28525	1.27541	1.22941	1.18803	1.235	1.15326	1.15922	1.18369	1.24643	1.46323	1.16447	1.32106	1.37788	1.2666	1.25514	1.2108	1.28011	1.40749	1.27091	1.31857	1.18814	1.22601	1.29518	1.09125	1.16105	1.08784	1.5394	1.51978	1.50824	1.31796
0.625	1.73459	1.47764	1.54393	1.25165	1.279	1.35951	1.19811	1.21547	1.15069	1.39134	1.40247	1.13347	1.28587	1.22584	1.26234	1.23995	1.29002	1.24914	1.30021	1.15097	1.368	1.27277	1.27554	1.1924	1.22944	1.21477	1.19917	1.25683	1.35484	1.37046	1.27233	1.2577	1.22681	1.27701	1.25895	1.23729	1.36153	1.24535	1.16722	1.19236	1.24238	1.22898	1.18657	1.2042	1.23802	1.20813	1.47151	1.14461	1.36427
0.3125	1.33685	1.54662	1.2012	1.474	1.30695	1.41375	1.44642	1.27961	1.27208	1.3871	1.38751	1.32854	1.26771	1.27971	1.27968	1.28458	1.23214	1.3326	1.015	1.32923	1.32119	1.34182	1.1879	1.2279	1.28729	1.14955	1.20911	1.33655	1.17582	1.48208	1.26609	1.28045	1.27205	1.18202	1.16063	1.21615	1.062	1.40697	1.27102	1.33348	1.29292	1.2335	1.18064	1.03623	1.12779	1.55252	1.2698	1.70115	1.23646
0.15625	1.16409	1.33711	1.1353	1.21407	1.28219	1.07326	1.3154	1.23316	1.26534	1.4279	1.14848	1.35026	1.22833	1.26306	1.23354	1.19782	1.20051	1.15146	1.16956	1.26759	1.15281	1.21159	1.23239	1.16285	1.14596	1.14224	1.17968	1.14549	1.36342	1.28222	1.20457	1.2297	1.22179	1.1984	1.192	1.15604	1.32128	1.25517	1.23523	1.1935	1.17919	1.19168	1.08291	1.1284	1.06212	1.54908	1.29084	1.36979	1.27816
0.078125	1.2506	0.791641	1.28037	1.25769	1.18222	1.20858	1.33763	1.3003	1.23264	1.31509	1.37256	1.22633	1.19232	1.09562	1.27146	1.14134	1.19846	1.16733	1.06559	1.18779	1.19464	1.22021	1.28643	1.29952	1.31588	1.15035	1.2114	1.31985	1.30881	1.24863	1.1999	1.18538	1.25264	1.14961	1.2315	1.12788	1.30273	0.926771	1.09424	1.16133	1.23387	1.14899	1.15778	1.07458	1.05495	1.31885	1.19139	1.24479	1.19215
0.039063	1.3131	1.49498	0.910255	1.393	1.37821	1.47417	1.38289	1.22112	1.31301	1.22795	1.30444	1.17075	1.27245	1.68391	1.2003	1.26948	1.58627	1.22815	1.08023	1.33226	1.15234	1.2545	1.24017	1.26021	1.48427	1.19235	1.5101	1.41263	1.17735	1.14849	1.13868	1.19187	1.22051	1.19134	1.43638	1.13584	1.09307	1.07508	1.15716	1.10899	1.17403	1.19931	1.03631	1.11321	1.00935	1.37472	1.259	1.29815	1.18023
							1.52534	1.25937	1.46553
[truncated: 32 more columns]

## Sheet: Figure 1-figure supplement 1D
ASNS	veh	Tg	357	3610
	1	3.34367	2.31777	1.73651
	0.873341	4.4806	3.41658	1.93653
	0.773704	3.67315	2.51519	1.99886
CHAC1	veh	Tg	357	3610
	1	24.5165	16.4235	12.3631
	0.666446	25.4769	21.1359	8.80012
	0.612866	22.2158	18.0687	13.8791

## Sheet: Figure 1-figure supplement 1E
Asns	Veh	Tg	0357	3610
	1	3.13833	1.67736	1.75024
	1	3.66325	1.3458	1.51004
	1	3.12718	1.34727	1.45943
Chac1	Veh	Tg	0357	3610
	1	44.968	4.59882	6.30701
	1	47.1999	4.48075	3.83135
	1	38.4082	6.97009	3.88499

## Sheet: Figure 1-figure supplement 
BiP	veh	Tg	357	3610
	1	11.0891	0.305689	0.652494
	0.893304	11.254	0.586972	0.990443
	0.766175	12.785	0.480801	1.22001
HSPA1A	veh	Tg	357	3610
	1	0.106267	0.238327	0.753843
	0.592987	0.116097	0.275575	0.53649
	0.58204	0.106227	0.405535	1.0515
NQO1	veh	Tg	0357	3610
	1	0.737718	0.766054	0.928455
	0.772092	0.852543	1.02363	1.12449
	0.731009	0.683707	0.70127	0.937036
