# Supplementary material for: Pharmacologic activation of integrated stress response kinases inhibits pathologic mitochondrial fragmentation
Source: eLife. 2025 Feb 12;13:RP100541. doi: 10.7554/eLife.100541 (PMC11820110; doi:10.7554/eLife.100541)
Supplement: Figure 1—source data 1. [file elife-100541-fig1-data1.xlsx]

## Sheet: Figure 1C
Veh	ISRIB	10 µM 0357	10 µM 0357 + ISRIB	20 µM 0357	20 µM 0357 + ISRIB
86281	75710	119410	61501	200679	119737
85116	74003	114017	80378	176908	128965
78913	75714	123749	66939	188476	111028
85873	78296

## Sheet: Figure 1D
Veh	ISRIB	10 µM 3610	10 µM 3610 + ISRIB	20 µM 3610	20 µM 3610+ ISRIB
96245	85857	126761	81282	214189	101156
102741	92924	145496	92840	183453	111332
96737	85862	127900	86560	199707	89599
96406	94332

## Sheet: Figure 1E
[0357] µM	XBP1-RLUC			HSE-FLUC			ARE-FLUC			ATF4-FLUC
40	0.825299	0.673012	1.01934	0.045051	0.06953	0.110672	0.038246	0.033308	0.061268		3.87343	4.93432
20	0.935831	0.941971	1.0304	0.282646	0.290052	0.259195	0.266094	0.279849	0.285589	2.84425	2.39166	3.27379
10	1.06724	0.912496	0.954252	0.873858	0.879618	0.736238	0.48877	0.503563	0.440473	1.76827	1.89986	1.64037
5	1.02917	1.06724	1.0525	0.558093	0.456883	0.52703	0.773517	0.757843	0.786605	1.20153	1.29369	1.40549
2.5	0.992324	0.878109	0.950568	0.471489	0.344977	0.402575	0.684075	0.821403	0.951286	1.20356	1.22581	1.06876
1.25	1.05496	1.04759	1.109	0.604995	0.917058	0.816054	0.905222	0.878184	0.890096	1.06924	0.854366	0.992214
0.625	1.0218	1.0218	1.10531	0.559944	0.511808	0.517156	0.968723	0.864958	0.90918	1.13044	1.00355	1.00339
0.3125	1.26374	0.961621	1.00829	0.627829	0.536493	0.631531	0.958065	0.847795	0.971839	0.863781	1.03083	0.795526
0.15625	1.17777	0.964077	1.09917	0.795894	0.588949	0.510779	0.937257	0.994782	0.814075	0.989379	0.87266	1.03576

## Sheet: Figure 1F
[3610] µM	XBP1-RLUC			HSE-FLUC			ARE-FLUC			ATF4-FLUC
40	1.69358	1.63709	1.69236	0.053279	0.034559	0.043611	0.012853	0.016576	0.032015	4.37243	4.29351
20	1.40743	2.0043	1.48603	0.16354	0.319263	0.146466	0.226124	0.382144	0.245188	3.34202	2.48848
10	1.65428	1.41357	1.76604	0.648194	0.326463	0.56015	0.601823	0.456814	0.442785	1.94319	2.00448
5	1.50322	1.56586	1.35217	0.465934	1.0193	0.655599	0.576763	0.645163	0.572159	1.61137	1.43984
2.5	1.02794	1.38287	1.25391	0.404221	1.05468	0.859664	0.857199	0.772577	0.739288	1.49223	1.09327
1.25	1.249	1.24409	1.23672	0.320908	1.00695	0.660948	0.859942	0.702825	1.14753	0.576422	1.18246
0.625	1.23058	1.26128	1.15321	0.224019	1.16	1.11022	0.840055	0.744225	0.873305	1.25415	0.701356
0.3125	1.15198	1.46392	1.26128	0.439809	0.798774	0.608903	0.815153	0.911531	0.939824	1.30101	1.04832
0.15625	1.20479	1.26128	1.27602	0.717107	0.968279	0.740969	0.729413	0.75702	0.730118	1.21182	1.16871

## Sheet: Figure 1G
Veh	357	HRI KD Veh	HRIKD + 0357	PERK KD Veh	PERK KD + 0357	GCN2 KD Veh	GCN2KD + 0357	PKR KD Veh	PKRKD + 0357
1	1.73768	1.02034	1.04643	1.09757	1.46276	0.86415	1.23604	0.994423	1.51056
1	1.82978	0.846112	0.874311	0.878124	1.53692	0.811922	1.53415	0.965351	1.60837
1	1.34341	0.842726	0.813258	0.991579	1.31318	0.797774	1.17057	0.969594	1.31433
1	1.67328	0.773931	0.811848	0.917136	1.46393	0.780338	1.58009	0.861539	1.6787

## Sheet: Figure 1H
Veh	3610	HRI KD Veh	HRI KD + 3610	PERK KD Veh	PERK KD + 3610	GCN2 KD Veh	GCN2 KD + 3610	PKR KD Veh	PKR KD + 3610
1	1.43579	1.02034	0.955048	1.09757	1.45344	0.86415	1.23838	0.994423	1.31691
1	1.68965	0.846112	0.89367	0.878124	1.45695	0.811922	1.79191	0.965351	1.79011
1	1.18653	0.842726	0.821179	0.991579	1.276	0.797774	1.18212	0.969594	1.35628
1	1.36339	0.773931	0.825708	0.917136	1.41323	0.780338	1.48087	0.861539	1.5378
