# Supplementary material for: Pharmacologic activation of integrated stress response kinases inhibits pathologic mitochondrial fragmentation
Source: eLife. 2025 Feb 12;13:RP100541. doi: 10.7554/eLife.100541 (PMC11820110; doi:10.7554/eLife.100541)
Supplement: Figure 2—figure supplement 1—source data 1. [file elife-100541-fig2-figsupp1-data1.xlsx]

## Sheet: Figure 2-figure supplement 1C
DMSO	Tg	CCCP
6.97311	1.46257
6.61465	1.69356
7.27251	2.98501
7.54378	2.5932
7.72653	2.43842
6.31586	2.86655
6.39366	1.95213
6.62406	1.90243
	1.70699
8.3926	2.68533
	2.52391
	1.84277
	2.88545
	1.73508
	1.87262
	1.74251
	1.98192
	1.71866
	2.21222
9.37012	2.66521
	2.73229
8.12675	4.11669
	4.05754
	3.50485
	5.18825
	4.22568
	5.63473
8.75742	5.17168
	4.20638	1.3709
8.59066	4.73527	1.1049
	3.48091	1.31676
	5.23621	1.18172
	3.83366	1.1822
1.51859	5.71605	1.72733
1.79726	5.84848	1.18931
1.13969	13.0637	1.12652
1.41265	6.69663	1.83962
1.49652	10.8184	1.40314
1.517	9.55116	1.29433
1.65939	10.741	1.77963
1.55835	12.9049	1.25577
1.58528	6.47173	1.75301
1.93618	10.0612	1.6939
1.12361		1.97971
1.76226	6.89866	1.75486
1.65314	6.62753	1.42413
1.48048	8.38391	0.941498
1.80824	7.59055	0.867573
1.23746	7.59958	0.83651
1.60787		0.860718
1.19186		1.54285
1.52297	13.6959	1.34129
1.91046		1.35403
1.70003		1.30745
1.82658		1.79161
1.93382	6.56825	1.1282
1.38841		1.00939
1.95122	3.03736	1.57248
1.45594	2.62921	1.59599
1.65968	2.98418	1.62402
1.99802	2.48364	1.74786
2.12237	3.06654	1.97988
3.00069	2.80734	0.957596
3.0172	2.1274	1.86867
2.4115	3.12933	1.647
2.76716	2.73626	1.71155
3.91653	3.02283	1.23779
4.41357	2.60859	1.06078
4.41212	2.53607	1.16269
2.55161	2.41172	1.94974
4.60091	2.49819	1.29365
2.75512	2.96276	1.18043
3.29394	2.62194	1.39285
4.9703	2.51084	1.33598
2.51408	2.65124	1.78108
3.57688	2.81096	1.88318
3.71459	2.446	1.99092
2.25758	2.56698	1.44238
2.28933	2.72668	1.91919
3.38567	2.84831	1.17974
4.8026	2.48289	1.57046
2.09854	2.9734	0.904331
3.8209	2.56925	1.25885
4.81529	2.45135	1.09156
4.66231	3.07377	1.31958
2.21317	2.15522	1.00256
3.35258	2.55218	1.05708
4.14277	2.86243	1.06606
2.06894	6.01435	1.76049
2.289	3.64109	1.72442
3.07137	4.35938	1.18227
2.98906	4.9865	1.39104
2.90664	4.40142	1.03204
2.44627	5.60223	1.42242
2.95508	3.65933	0.855019
2.10081	3.51267	1.2401
3.74567	3.75661	1.75446
4.66328	3.44224	1.42775
3.38042	4.9579	1.34633
3.75384	5.54013	1.74644
2.41682	3.15545	1.89509
2.08415	6.06421	1.13034
4.9104	3.88986	1.80001
2.73236	3.23795	1.79773
2.53389	5.85606	1.139
4.16107	4.658	1.31285
2.65189	3.50771	1.46738
2.5989	3.9687	1.81243
4.09715	5.80732	1.57823
2.22963	3.4407	1.93925
2.69654	3.60985	1.34901
4.82135	4.34895	1.213
5.30341	5.10747	1.06901
2.3452	3.15263	1.56158
2.47158	3.14099	1.6643
2.61625	4.08831	0.959761
3.83931	3.87995	1.32674
5.84288	4.84182	1.27808
4.77976	3.16425	1.16196
2.2792	4.37636	1.01117
2.74755	3.27719	1.4114
5.98591	3.71654	0.905827
	3.67397	1.22355
8.10139	4.1788	1.53153
6.61996	5.48037	1.55399
	4.67529	1.31981
	4.27538	1.03188
	4.31098	1.43795
	9.8326	1.17235
	8.65238	1.1021
6.12579	8.54179	1.07369
7.6002		1.61864
6.58041	13.2328	1.18616
	8.04297	1.84918
6.4619	15.5379	1.97375
	6.39808	1.04778
	10.6281	0.949902
	8.37383	0.976242
		1.59146
		1.08204
8.00036		1.71062
	6.31377	1.26806
		1.45464
6.24789	7.24678	1.52828
	10.8568	1.24049
		0.934628
6.26809		1.65601
	7.98033	1.09593
	6.74242	1.28629
	10.6277	1.78784
	9.54172	0.822174
	12.5723	1.68547
6.07555		1.31898
7.24689		1.71223
		1.78392
		1.92149
6.01981	7.76645	1.93323
		1.3064
8.96119	6.31281	1.56236
	6.37679	1.44208
	7.19588	1.69077
6.76892	14.2422	1.34344
6.15271	10.2908	0.907669
		1.28008
	10.166	1.18814
	7.82672	1.87628
		1.24666
7.91491	7.12301	1.97519
	13.2284	1.599
9.06548	8.60681	1.72548
		1.89984
	13.1172	1.37117
	9.31574	1.24654
6.24442	10.4327	1.17431
		1.01758
		1.77551
7.28674	12.1311	1.04381
9.01826	8.79067	1.05402
	6.7252	1.96354
	8.16332	1.81723
		1.19748
	7.85122	1.30119
		1.44132
	8.05118	1.50095
1.63177	8.21049	1.35742
1.70498		1.75671
1.67379		1.27003
1.34445		1.47183
1.56497	13.2723	1.3466
1.52959	6.15994	0.864407
1.57297	8.05121	1.92828
1.50574		1.38604
1.98926	9.79554	0.857445
1.96412		1.01889
1.63647		1.23425
1.64754	9.57504	1.23432
1.77727	7.24928	1.21954
1.92001	9.38854	1.23568
1.90678	6.13218	1.30971
1.42646	7.31639	1.35279
1.51636		1.33734
1.98581		1.22356
1.32264	7.92555	1.07755
1.69436	6.56073	0.911083
1.99022	6.77742	0.869598
1.72592		1.65536
1.9431		0.950298
1.39164	8.02642	0.923515
1.62305	12.3301	1.30583
1.6436		1.67903
1.62872		1.56878
1.35974	13.6289	1.2633
1.93929	14.8112	1.25586
1.86575	2.14911	1.33571
1.75038	2.87558	1.19582
1.35852	2.4626	1.10382
1.52016	2.55142	1.54325
1.76472	2.44216	1.67413
1.73425	2.90734	1.08511
1.93581	2.90285	1.16122
1.93642	2.26541	1.73289
1.37408	2.17236	0.813
1.92242	2.85457	0.887565
1.70823	2.68988	0.929131
1.36942	2.02943	1.897
1.50633	2.32843	1.70663
1.82969	2.43069	1.54164
1.37655	3.05821	1.4308
1.19723	2.36024	0.995223
1.89627	2.72966	1.7123
1.84033	2.62512	0.863453
1.80613	2.40033	0.8498
1.38273	2.40828	1.63241
1.87649	2.95105	0.922173
1.93738	2.97458	1.34354
1.78442	2.4513	1.17414
1.86082	2.41131	1.50717
1.63457	2.31341	1.38674
1.12651	2.23489	1.41018
5.70268	2.47321	1.04946
3.78509	2.02744	1.48719
2.74414	2.65536	1.01545
2.7823	2.54258	0.990551
2.74205	2.53097	1.08873
2.2626	2.40013	1.31876
5.00101	3.08879	1.83994
3.61722	2.70914	1.80966
3.5417	2.47201	0.867971
2.49441	3.32182	0.90028
4.09329	3.1655	0.860435
3.61142	5.60501	1.41234
5.72887	4.86923	1.01321
2.56828	4.65628	0.980341
2.23804	4.89546	1.9449
3.42182	4.51157	1.74732
2.26744	5.3454	2.06909
3.20317	4.89372	2.83291
2.53029	3.79306
3.0192	3.63603	2.18923
4.93864	4.28144	3.55063
3.19311	3.56883	2.05179
4.45063	3.66248	2.20274
2.86694	3.82373
2.42368	3.84948	4.14029
2.8553	5.13406
3.19147	3.64438
2.34757	3.82225	2.92745
2.42795	3.65818
3.54918	5.17471	2.0723
3.02367	3.16442	2.73315
2.84105	3.38096	3.17049
4.06515	3.76324	2.50551
2.48328	4.92742	2.1972
3.06731	3.20953	2.30228
4.65723	4.72815	2.30391
3.82143	3.96094	2.43256
4.94582	5.00126	3.15831
3.57879	4.50057	2.42198
4.64077	4.50102	2.91219
3.96241	3.75379	3.35712
5.34384	5.98727	2.86222
3.56082	5.21739
2.98837	3.69306	3.24252
2.59492	4.42567	2.91651
4.39693	3.19988
3.17074	3.21176	3.10522
2.92982	4.03563	3.61287
5.55238	4.27057	3.32466
5.86162	4.0451	3.72106
2.30207	3.35443	2.83942
2.22929	3.80761	2.30964
2.68024	5.4645	3.88387
5.6526	5.43923	2.32996
5.6907	4.8895	3.4299
4.18736	5.09061	2.79036
4.21361	3.51263	2.66741
3.05914	3.1701	3.72405
2.69765	3.5242	2.03088
4.76093	3.69221	3.03425
5.3587	3.58363
5.60434	4.30209	2.42091
2.0937	3.50961
2.71004	3.31745
5.93519	3.39157	2.98224
2.75027	4.35691	3.20908
2.76284	4.53493
2.21001	5.89413
4.1979	3.5937	2.45388
3.4838	8.83704	3.96528
2.28915	9.3628	4.02127
2.91069	7.2696	2.53143
3.15909	6.28312	3.70289
3.97861	11.6903	2.02127
3.49301	8.35739
2.82985	6.45679	3.25681
3.26436		2.37653
2.63671		3.2816
4.04128		2.06388
4.46939	6.49678	3.90655
4.32199
5.94043
4.34727	6.53473	2.18906
3.01513		3.38891
5.61832		2.0081
2.11176		2.65526
2.92744		2.17356
4.10564		2.69946
3.38968		2.504
3.841	9.08109	2.61086
3.88891		2.50505
5.17168		2.07049
4.67799	6.27223	3.86282
4.70265	14.7098	3.2391
2.0518		3.31167
3.0478
2.05058	2.64559	2.85506
3.90942	3.04882	2.54135
2.66171	2.93625	3.57363
2.27197	2.70633	3.99578
3.52887	2.15124	3.49815
5.14936	2.23577
3.98102	2.29886	2.01294
2.12764	2.85314	3.67385
2.45976	2.88448	3.84052
2.63975	2.37254	2.35879
2.18267	2.73573	2.04075
4.27609	2.92345	2.33652
4.37892	2.64784
2.91314	2.37259	3.20066
2.86047	2.35545	2.7427
2.25397	5.94099	2.31754
2.68917	3.62638	2.15992
2.49461	3.41982	3.08425
2.68852	3.79462	4.13215
2.14984	3.17122
2.49631	4.13249	2.34388
4.66984	4.3172	3.17147
3.55033	4.66131	2.22036
3.68775	4.3673
5.92662	3.13643	2.73088
4.75616	4.42015	2.8828
2.24146	3.99667	2.43176
3.5603	4.35563	3.0267
2.97308	3.47762	2.20308
2.40698	3.27325	2.2383
6.72836	5.118	3.67028
7.32169	3.25464
7.00579	3.33113	2.27812
6.38491	4.15164	2.74314
	3.35996	2.27702
	5.65715
	4.79787
8.99245	3.83647
8.6659	6.32629
		1.78365
		1.98172
	14.5676	1.48677
		1.13295
8.44769	13.8538	1.33882
	14.4019	1.33134
	6.79654	0.88722
	13.3793	1.5617
	8.26711	1.10018
	12.1613	1.47259
8.01758		1.58519
		0.978314
		1.47346
	7.52378	1.07262
		1.06889
	15.2425	0.927498
1.83012	10.336	1.14079
1.91255	9.87879	1.56376
1.82221		1.2855
1.9278	13.4018	0.935805
1.34327	8.27384	1.94104
1.48214	14.4885	1.54196
1.8328	6.4301	1.6144
1.90452	7.6529	1.94342
1.98		0.979965
1.92859	15.5099	1.45416
1.53311	8.28522	1.34545
1.24691	11.0931	1.27514
1.14457		1.06627
1.57245	8.21929	1.14613
1.52294		0.939355
1.31812	11.0391	1.2347
1.83445	6.12881	1.63527
1.56749	15.237	0.943014
1.6459		0.926552
1.70943		1.41104
1.84564		1.03543
1.5249		0.979797
1.82796	11.0859	0.918083
1.57518	6.52552	1.95935
1.85835		1.73315
1.308	8.41029	1.59088
1.76262		1.59671
2.00039	6.53635	1.47829
2.90121		1.03948
3.3308	10.9424	1.48048
3.08185	2.65654	0.780754
4.7016	2.72607	1.76437
2.50999	2.56251	2.28128
3.01273	2.67065	2.39771
3.98013	2.52942	2.4628
4.4349	2.65665	3.06314
4.85821	2.49551	2.17914
3.00506	2.85205	3.83288
3.01637	2.60099	2.17372
5.49084	2.82381	2.27678
2.8371	2.78127
2.23649	3.03353	2.70451
3.51646	2.72067	3.4942
2.62068	2.53439	2.57111
2.44161	2.73079	3.0924
2.6798	3.32172	3.34472
4.39148	3.48371	2.46886
3.4624	3.31371	2.34047
5.22578	5.98912	2.75977
4.80313	5.05444	2.14398
5.94638	5.24687	2.12121
2.5253	3.53831	2.8644
4.33287	4.69852	3.15879
2.10588	4.07933	2.4549
2.35252	3.91747	2.20193
2.84284	3.92682	2.34883
3.40917	4.21075	2.59037
5.39838	4.8096	4.12223
4.1379	3.38747	3.69715
2.23972	3.33473	3.30161
4.51522	5.63997	3.46618
3.83467	4.23493	3.03067
4.01773	5.44158	3.35739
5.45963	4.24491
2.05448	5.3823	3.55041
3.6911	3.62707
5.35879	4.40601
2.58091	3.66265
2.7706	4.20287
4.64712	3.85472
3.27371	4.45273
5.13855	4.28625
2.66697	4.66651
4.41764	3.47703
2.2207	4.57771
2.36485	5.55762
3.17424	4.5834
2.0533
3.01664	8.49184
4.67966	6.22517
3.49877	9.58746
2.46886	11.3493
6.87997	8.42619
6.14632	10.7171
6.32903
7.98232	11.581
6.70466	14.6635
6.8851
6.46483
6.6766	6.75494
	13.639
8.86462	12.5611
		1.57367
	11.3622	1.37759
		1.31758
		1.70004
8.97227	11.4316	1.62749
		1.46141
	9.70309	1.23001
	2.87147	1.14684
	3.07019	1.36777
	2.82663	1.47475
	2.66688	1.36992
	2.47329	1.31254
	2.63228	1.89165
8.14918	2.88711	1.0687
	2.58759	1.22995
	2.66031	1.19898
	2.76268	1.48203
	3.11311	1.38714
	2.30852	1.57885
	2.94289	1.01912
	2.56009	1.60574
8.5552	5.25379	1.66278
8.76694	3.59571	1.55869
	3.96887	1.3243
	4.68694	1.76693
	4.78788	1.93097
	4.7185	1.13018
8.02507	4.56417	1.39553
	3.60522	0.936577
1.61616	3.61126	1.14193
1.92149	3.99108	0.925995
1.57207	3.29413	1.19141
1.42798	3.43734	1.74382
1.58949	5.01624	1.22107
1.03048	6.70696	0.977997
1.85295	7.80042	1.10715
1.87221		1.9489
1.54147	10.6078	1.72865
1.45446	10.8211	1.70522
1.96806		0.83588
1.46266	8.79912	1.83077
1.46665	8.38783	1.54438
1.54893		1.35964
1.47486	11.5134	1.65223
1.68022	9.75856	1.77251
1.94047		1.46498
1.9109	7.1421	1.25087
1.24024		1.02101
1.57596		1.26494
1.32991	8.26365	1.50207
1.5606		1.02534
1.92821	7.30692	1.10163
1.50908	11.2686	1.55299
1.58109	6.19119	1.47782
1.95581		1.14162
2.29865		0.920868
4.26394		1.85794
5.04913	8.59905	0.915939
3.73347		1.20713
4.79562		1.1026
2.36412		1.2396
5.19984	7.97113	1.19413
2.50168		1.02114
4.23529		0.986656
2.70246		1.03496
3.05989	10.0146	0.917839
4.39309	8.34089	1.17282
2.30789		1.44908
2.31939		1.30072
3.47492	11.3414	1.4722
2.2937	2.69734	1.31241
2.12542	3.11844	0.822029
3.24046	2.67353	0.874481
2.79741	3.03549	0.887985
3.24503	2.25125	1.36177
4.89621	2.75524	1.79259
4.36193	2.56234	0.942308
2.53914	2.76507	0.997166
3.57284	2.50711	0.83535
3.71555	2.7241	1.46873
3.62443	3.10368	1.10813
3.14995	3.097	1.48444
5.48959	2.83692	1.23848
4.93608	2.67982	1.69627
3.4754	2.57979	1.74186
4.70626	3.13157	1.94289
2.66481	2.91307	1.21796
4.82413	2.80689	1.75048
3.81779	2.66276	1.44621
2.90839	2.93539	1.82383
4.82441	3.74076	1.13601
5.70765	3.86599	1.83065
2.34897	5.8779	0.992935
3.67004	5.17975	1.74754
3.79586	3.61486	1.23082
5.88327	5.92397	1.79529
2.59954	4.11475	1.74549
2.48531	4.24077	1.80358
2.59288	4.33551	1.25823
2.12411	4.32487	1.28993
5.01684	3.95087	1.49471
5.99776	5.6392	0.926643
4.52157	3.30532	1.72061
3.56159	3.63106	1.43082
2.63242	3.36225	1.41619
2.45247	4.76452	1.32134
2.5823	3.44103	0.893353
3.7711	3.28969	1.2473
4.14511	3.60705	1.18088
2.53077	4.86946	1.56994
3.86278	4.69598	1.24023
2.88366	4.8904	1.10302
2.70428	4.85265	1.43817
2.78207	3.96612	1.30606
3.08474	4.07746	1.28
3.66029	4.14568	1.34365
4.94528	4.47696	0.924333
4.30461	4.12243	1.35208
5.37706	3.55385	1.65024
3.7014	3.94882	1.95049
4.14259	3.74786	1.11719
4.49044	4.62227	0.932419
4.05015	4.48891	0.996376
2.0723	5.04693	0.984398
5.35391	5.09327	1.26129
4.8243		0.994797
5.57405	6.19138	0.905605
2.68111	8.27487	1.35181
4.09391	14.1529	1.56103
2.16835	11.3863	1.21667
2.0623	9.15472	1.11666
4.55922		1.12771
4.34437	7.32284	1.026
2.82719	14.1104	1.2944
7.45028		0.979897
7.65856	7.44033	1.30344
6.70137		1.73005
6.9648	10.362	0.959448
7.95513	8.96386	0.845779
6.16093	8.85958	1.07203
6.25252	11.4441	1.22837
7.57056	10.3462	1.82165
6.59108	6.91445	1.78182
7.96296		1.43584
	7.13885	1.46245
8.30883	7.28209	1.78965
		1.91495
	8.57566	1.12976
	7.8686	1.36806
		1.72011
		1.10924
		1.30603
	9.81765	1.3696
		1.21918
	7.51456	1.91343
		1.21985
	15.617	1.14495
		1.78412
		1.52047
	9.11856	0.975277
		1.217
		1.03751
	8.31162	1.58904
		0.929451
		1.92737
	6.6019	0.859125
		0.917374
	2.44607	0.957863
	2.87889	1.04231
	2.50887	0.966675
	2.85664	0.846695
	2.98088	1.45772
	2.16988	1.71223
	2.37787	1.98536
	3.72845	1.01914
8.69047	3.85773	1.28122
	5.07878	1.146
1.43949	4.69053	1.69341
1.80431	3.18582	1.02997
1.49996	3.58977	1.30583
1.99556	4.14039	1.70761
1.63882	5.81208	1.18313
1.51655	3.99811	1.27908
1.75258	3.99104	0.907022
1.61324	3.62285	1.1382
1.7305	4.35956	1.44505
1.82775	4.40849	1.08813
1.35674	3.20406	0.836464
1.60287	4.11514	1.10717
1.52203	5.87715	1.12052
1.8647	3.60996	0.967303
1.06699	4.51066	1.68224
1.82179	3.69668	1.68551
1.24588	3.81386	1.30345
1.63176	5.8014	1.87901
1.73994	4.47292	1.01815
1.4744	3.97519	1.82278
1.56037	5.81472	1.09681
1.68657	3.76396	1.4902
1.70879	10.4178	1.18409
1.87695	14.3614	1.76104
1.5224	10.0103	1.50135
1.80896	6.40658	1.18618
1.49439	6.34359	0.965281
1.39362	13.9742	1.59096
1.4665	14.8641	1.86564
1.84914	7.80142	1.50508
1.841	7.24987	1.78452
1.74125		0.978432
1.55799	7.63923	1.91964
1.49718		1.07902
1.67986	7.1804	1.41627
1.33082		1.18829
1.74311		1.77897
1.3842	6.48556	1.55233
1.95753		1.79791
1.53298	6.9251	1.70926
1.94057		1.65909
1.98228	7.7146	1.76483
1.51321		1.15405
1.96515		1.45541
1.58057		0.825681
1.28085	8.03357	0.907529
1.91891	7.78763	1.35266
1.23639	3.02534	1.54347
1.60429	2.60001	1.07702
1.62161	2.76427	1.52142
1.76733	2.7949	1.69986
1.87274	3.06272	2.45889
5.68211	2.10808	2.65556
2.81277	2.70383	2.33862
2.01821	3.28136	2.3287
5.07842	3.20009	3.91332
2.94702	3.9183	3.47338
2.82146	3.16235	2.70549
3.47991	4.65296	2.41725
2.75025	4.05729	2.0299
2.40411	3.40259	2.28752
4.12987	3.57166	2.04301
2.48469	4.17556	3.34836
3.25835	5.91788	2.14967
3.48631	4.72385	2.42999
2.64635	3.22201	3.80801
5.66307	4.61005	2.57967
2.3054	4.36454
5.28809	3.54485	2.81714
2.23899	4.24869	2.1095
4.38931	5.69246	2.45843
2.01065	5.58366	4.18235
2.4196	3.41335	3.533
2.55035	4.69712
2.11319	5.7808	3.37958
3.57319	4.1463	2.37298
3.0639	5.21122	3.28998
2.24659	8.80632	3.91624
5.96463	14.6333	2.12354
2.13401	6.82777
2.34615	11.2034	2.43733
4.66386	10.9999	2.76942
2.06928
5.95505	10.0909	2.03973
2.47259	7.81387	2.55714
2.93361	11.864	2.36404
2.77235		2.10562
2.17788	13.4142	3.24774
2.86247	9.27182	2.26995
2.02835	6.56278	3.34729
2.57977		2.171
2.52786		2.0685
5.89783	6.27787
3.00826		2.60344
3.15542		2.98825
4.65034		3.14423
2.86435	7.63409
2.51807		4.12777
2.08223	7.17308	2.89498
2.71137		2.18308
3.34917		2.89753
3.76714		3.28677
2.78784	8.41503	2.49007
2.52099		2.74362
3.01746	11.7114	3.9623
2.20491		2.36245
2.1244	6.23318	2.45117
5.04821		3.18913
5.43631		3.23759
4.71106		3.02386
2.05074	2.61548
2.99126	2.05888	2.57751
2.32213	2.55668	3.09257
4.47079	2.27162
3.98825	2.84153	2.02531
5.29256	2.53453
2.46675	2.86271
4.90063	2.62375	2.73486
4.85366	2.15898	2.89961
2.54987	2.9341	2.43517
2.1464	2.40449	2.01311
2.4587	2.9553
4.53906	2.84914	2.31077
4.12309	2.70821	3.20511
3.35784	3.06822	4.03446
2.64077	2.90733	3.84953
3.39068	4.0285	2.7959
3.41178	4.43245	3.03254
3.04842	4.12283	2.6364
2.07408	3.15231	2.35297
3.04491	4.60047	3.44484
2.99219	4.80396	2.34428
2.48995	3.69518	2.33968
2.12656	3.29833	2.03442
5.24927	5.36483
2.07831	6.01735
2.90524	5.39915	3.1821
3.36731	5.47964	3.80426
2.6009	4.69517	3.90002
5.78085	3.66962	2.42154
4.79016	5.97003	2.18863
2.85083	4.3672	2.4821
5.33284	3.15002	3.14936
2.27877	4.28806	2.8618
3.91473	3.96621	2.23588
2.68685	4.06046
3.34936	3.75346	3.79167
2.43994	3.6451	2.46278
5.17326	5.03425	2.83704
2.50898	5.79373	2.89679
2.78944	5.52713	2.32712
3.33314	4.37604
5.52845	4.23287	3.37723
3.39362	5.75972	2.05914
2.42097		3.11784
7.95863		2.09052
6.90619		2.27286
7.89357		2.59052
6.1425		3.50124
6.65576		2.24474
6.28183
7.01221		3.44875
7.49814
7.36817		2.22209
		4.17078
		2.23571
		3.05182
		3.49489
		3.39405
		2.97416
		2.08069
		2.09803
		2.73262
		2.40137
8.19159		2.07421
9.13599		2.1526
		2.05196
		3.56306
		2.84556
		4.10001
9.35888		2.13207
		3.0013
		2.34867
		4.02995
		2.36635
		3.66162
		3.61919
9.42315
9.3784
		2.97711
8.66147		2.19968
		2.77641
8.9743
1.74474		2.46214
1.54545		2.35301
1.35443
1.77557
1.31444
1.38163
1.65137
1.84212
1.40917
1.79201
1.59499
1.81605
1.0919
1.21278
1.76254
1.96809
1.74159
1.36897
1.86192		1.92091
1.69129		1.44878
1.54337		1.60996
1.43108		1.61857
1.56857		1.81541
1.76973		0.942482
1.88571		0.965942
1.91109		1.66142
1.65834		1.66521
1.44706		1.17237
1.90909		0.745514
1.34699		1.49415
1.69566		1.41238
1.60033		1.65889
1.69014		0.903404
1.53635		1.67453
1.61309		0.780771
1.63515		1.77752
1.14967		0.775208
1.95572		0.993317
1.81098		1.7239
1.29553		1.32719
1.95348		1.13595
2.07542		1.87585
3.38824		1.2284
5.51071		0.961788
3.32249		1.2568
2.11444		1.20104
5.0355		0.866608
2.38078		0.922195
2.33475		1.34421
3.67354		1.55046
3.88352		1.62537
2.98019		1.24171
2.45581		1.56789
2.72672		0.843475
2.06637		0.805916
3.15047		1.16103
2.47552		0.92918
3.00256		1.34004
2.81573		1.35253
2.39904		1.82084
4.92769		1.41943
2.28361		1.10763
3.2133		1.9218
3.51823		1.95864
5.06622		1.91987
2.22667		1.48763
2.59927		1.68996
2.43386		1.55154
2.74197		0.716484
3.38728		1.2822
2.50735		1.92587
2.85666		0.890476
3.62153		1.80478
2.9711		1.42945
2.07193		1.1889
2.02609		0.976517
2.46447		0.737091
5.42998		1.6664
4.63332		0.857302
2.06579		1.57475
3.25552		0.844414
2.35606		1.91187
5.33758		1.22097
2.76418		1.6115
4.17763		1.55588
4.93053		1.38093
2.17956		1.39628
2.36825		1.05929
3.73481		1.10146
3.92393		0.906746
4.80445		0.713089
2.62009		1.4608
2.73993		1.29857
2.70457		1.04045
3.22129		1.88962
4.08369		1.57154
5.94764		1.06561
2.84874		0.959846
5.26948		1.27428
3.10496		1.26647
3.36714		1.05636
2.61413		1.62141
3.92912		1.86496
3.95267		1.18863
4.60569		1.50897
5.47784		1.709
2.56612		1.02961
2.41843		1.76163
3.4028		1.04188
2.22342		1.18486
3.21379		0.778481
5.27753		0.704369
5.50348		1.77009
5.37625		1.63652
2.08232		1.73965
4.83481		1.67347
4.14003		1.15009
2.2111		1.18046
6.28354		1.34963
6.34046		1.45293
7.30585		1.41679
6.53692		1.92435
7.78941		0.984344
6.88255		1.33713
6.16434		1.48316
6.55401		1.19833
7.14284		1.62677
		1.22253
		1.41296
		1.58316
8.82187		1.09879
		1.45504
		1.33587
		1.1808
		1.96431
		1.35435
		0.905611
		0.835859
		1.4678
		1.14407
		0.917442
9.38567		0.77652
		1.74178
		1.03817
		1.09963
		1.30217
		1.39348
		1.24359
		1.70862
1.55955		0.733734
1.45071		0.946846
1.59745		1.08377
1.73679		1.54727
1.95715		0.795166
1.81271		1.40242
1.68073		1.5368
1.36984		0.899708
1.21519		1.24142
1.8461		1.14711
1.98448		1.14438
1.68665		1.2075
1.20384		1.84909
1.3793		0.950081
1.8303		1.41376
1.57263		1.75225
1.93125		0.782669
1.6981		1.78976
1.59764		1.19287
1.64838		1.84113
1.80647		1.10978
1.99657		1.51608
1.4041		1.89022
1.38983		0.989473
5.53114		0.786963
2.99939		1.04797
2.31919		0.978802
2.15491		0.670313
4.11592		1.59921
3.34468		1.00724
4.22121		1.12027
5.78931		1.07663
3.05243		0.862675
2.30309		1.25198
2.14224		0.721714
2.35898		1.83272
5.00465		1.14762
3.62575		1.37219
2.43089		1.98405
5.3141		1.26845
2.30328		1.78834
2.90326		1.47968
2.86754		0.854748
5.87379		0.944698
4.28822		1.16891
2.34721		0.787992
3.54011		0.943779
2.40569		1.80749
5.06597		1.00292
5.92602		1.39609
2.10859		1.33593
2.54954		0.853857
2.34384		0.872738
2.75464		1.9683
3.25917		0.976017
2.04354		0.918655
2.60098		1.048
4.26879		2.05294
2.03565		2.44184
3.41044		3.00398
2.58427
2.54557		3.33048
5.13972		2.9176
3.39484		2.26519
7.71797		2.7416
6.09995		3.12453
7.90393		2.85661
6.00769		2.79248
9.13251
		2.4157
		3.33257
		2.95234
		2.45859
8.12947		2.14921
		3.97684
		4.02713
		2.84083
		2.79572
		2.11622
		2.46628
		3.07385
		2.90637
		3.48066
		2.07695
1.95121
1.16938
1.80864		2.1175
1.4227		2.21552
1.32357		3.02391
1.22919		2.25269
1.66716		3.03577
1.64719		2.7254
1.71776		2.2734
1.97751
1.55234		2.15598
1.88646		2.91673
1.84461		2.42631
1.76434		2.02263
1.09092		3.8273
1.50172		3.03684
1.48641
1.38218		2.27406
1.83844		2.81816
1.38978		2.50823
1.78234		2.13971
1.50274		2.00098
2.56493		2.31606
2.37463		2.8661
3.22691		2.88329
2.25735
2.34111		3.86388
2.21088		2.28148
2.36057
2.62227		2.38797
3.12219		3.62348
2.04187
4.69311		2.7495
4.37549		2.30597
5.4448		3.67809
2.72858		4.0435
2.73923		2.25294
4.15234		2.41164
2.34865		2.20431
3.50618		2.55733
2.76145		2.6369
3.08685		3.13912
4.70932		2.35921
5.08121		2.17118
2.13977		2.9749
3.05582		2.70232
3.77111
2.12618		4.01354
4.60324		3.96149
2.26776		2.54936
3.91788
5.22469
5.47945		2.76626
2.40824		2.29293
3.42081		4.01669
5.2763		2.58261
3.64555		2.40599
5.14896
2.1993
5.69741		2.82874
2.17736		3.70428
2.3185		3.97428
4.57233		2.37346
3.27802		3.1187
2.05131		3.13164
5.74493		2.87513
4.22111
2.20617		3.13948
3.59324		1.16864
5.01684		1.72799
4.14394		1.78293
2.12949		0.984514
2.68452		1.31889
6.37835		1.75692
7.79724		0.936623
7.81249		1.76221
9.1815		1.31756
		1.70627
		1.10023
		1.80148
		1.158
		0.928982
		1.92968
		1.24666
9.16597		1.78057
		0.772324
8.72416		1.92339
		1.32314
		1.41367
		1.1156
		1.0717
		1.61199
		1.56373
		1.60464
		1.43439
		1.06568
		1.974
		0.901104
		0.918709
		1.07487
		0.764511
8.57097		1.61217
		0.860802
		1.18114
1.75262		1.20984
1.42314		1.69308
1.50186		0.705231
1.95081		1.53558
1.5545		0.815437
1.46162		1.06419
1.517		1.38451
1.18556		1.77416
1.46702		0.887291
1.76625		1.13636
1.92766		1.31896
1.41727		0.74794
1.42778		1.58724
1.80653		1.10421
1.36808		1.5078
1.81922		1.49782
1.96024		1.96024
1.65339		0.659817
1.71845		1.40334
1.56789		0.968361
1.6461		1.6916
1.71122		0.940956
1.69228		0.99537
1.66408		0.792404
1.82227		1.35133
1.23166		0.885086
1.93316		0.957932
1.76323		1.15427
1.76543		0.957058
1.41954		1.47707
1.76238		1.17491
1.9063		1.50025
1.59848		1.25776
1.42778		1.26958
2.0051		1.63636
2.65091		1.31551
2.58738		0.903519
3.63461		1.34115
2.82923		1.22614
4.88983		1.99143
2.3532		1.23601
2.1786		1.95913
3.56906		1.08943
2.28725		1.87869
3.06078		1.01966
2.33279		1.67426
2.7804		0.880764
2.35045		1.26658
2.29928		1.2261
2.14327		0.840092
4.11305		1.25195
5.64326		0.856422
5.39214		1.8032
3.67472		0.823239
3.92679		0.818329
3.38208		1.61463
5.49497		1.88731
4.33679		1.58678
5.31088		1.3268
4.11802		0.924271
2.37572		1.56906
2.2671		0.851845
2.5066		1.38595
3.24471		1.5476
2.4493		1.76286
3.99841		1.78574
4.1287		1.09834
4.0471		1.0227
5.28949		1.7771
3.71452		1.64391
5.13148		1.58895
2.07717		0.896523
2.93987		1.43678
5.22578		1.15748
2.99465		0.684639
2.14522		0.857063
3.44915		1.21264
2.65523		0.647926
3.06123		1.52583
2.3363		1.39482
3.64152		1.46269
4.52299		1.33221
2.02124		1.09366
4.47561		0.708298
2.16779		1.22701
3.38699		0.979435
2.41346		0.927505
3.64042		1.19291
3.52867		1.07345
3.1035		0.913418
2.17731		0.888245
2.31871		0.744123
2.44978		1.40395
4.11681		1.52444
2.78517		1.02629
2.11761		1.53566
5.77265		1.55394
3.03816		1.9952
2.75863		1.13907
2.74074		1.05148
2.27466		1.13105
3.26054		1.62899
5.46006		1.1545
3.31249		1.65016
2.21907		1.83498
4.03975		1.30462
3.51223		1.43963
3.51582		1.2764
4.41634		0.778442
3.28602		1.97035
2.42302		1.40196
2.08509		1.29023
2.23984		1.80505
5.96157		1.23975
2.23111		1.09136
4.90526		1.06076
3.12311		1.03749
4.67178		1.56293
2.44172		1.75959
5.96403		1.13984
1.14288		0.936684
1.55412		1.02707
1.52345		0.883712
1.50575		1.82931
1.92027		1.93359
1.95866		1.79722
1.91903		1.70377
1.58449		1.46346
1.84182		1.41786
1.38605		1.44078
1.96313		1.20944
1.29843		0.779213
1.77519		0.771307
1.34667		1.60345
1.71764		0.889589
1.62418		0.916584
1.81934		1.33598
1.82905		1.08903
4.33106		0.847157
2.30318		0.990413
4.34468		1.3318
4.13889		1.33573
2.65233		1.71843
5.96499		0.818192
2.13712		1.4165
4.86977		1.41105
4.08913		1.23616
3.16691		0.834536
2.84123		1.26372
5.16104		1.36531
2.89313		1.18964
3.74462		1.11384
2.73866		1.0176
2.88933		1.35379
2.54111		1.06655
5.63638		1.53117
3.70583		0.980936
3.76787		1.67635
2.35973		0.731965
2.08976		1.29464
4.93252		0.753132
2.64418		0.913044
5.45674		1.45882
3.01821		1.1356
2.18741		1.33896
5.60685		0.692111
2.16539		1.51306
2.23004		1.44108
2.50074		1.11616
2.1012		0.958929
2.85463		2.40505
3.65756
2.15711		2.33574
2.45924		2.01357
3.51987		3.30998
4.52226		2.08414
2.26358		2.84705
2.91704		2.09119
4.02041		2.0808
3.06555		3.73742
5.53526
4.82177		2.83806
3.60548		3.28053
4.93733		3.11345
3.63747		3.22101
2.61522		2.60719
2.34873
2.07051		2.58307
2.49817		2.04021
3.34727		2.80238
3.10522		3.5198
2.40116
2.74407
3.19624
3.0444		2.36724
2.04573		3.20821
2.21753		2.51345
2.8614		3.97
4.41963		2.15865
2.29218		3.40968
3.37923		2.04366
7.12582		3.61639
7.8583		3.31116
7.66855		2.89302
6.01917		2.30795
6.03141		2.40325
6.43298
6.09669		3.52217
7.41688		3.51958
		3.19887
		3.1951
		2.63084
		2.19987
		2.22449
		3.34
		2.00005
		2.01396
		3.96687
		2.02182
		2.71498
		2.5379
		2.17355
		3.36882
		2.06845
		2.79031
		3.81264
		2.41624
		3.42367
		2.62714
		2.31719
		3.44736
		2.20455
		3.43599
		3.64081
		2.07426
		2.10381
		2.02569
		2.75285
		2.56287
		3.4829
		2.10018
		2.25135
		2.9846
		3.96702
		2.92489
		2.4837
		2.84426
		2.70463
		2.22522
		2.15254
		2.46993
		3.03618
		2.99187
		2.32201
		2.31786
		2.92241
		2.8314
		2.05489
		3.38474
		2.83198
		2.50546
		3.17908
		2.22245
		2.8605
		2.22391
		2.41455
		2.87899
		3.58278
		3.05404
		3.91522
		2.21594
		2.5216
		1.33693
		1.85072
		1.7408
		1.19594
		0.941833
		1.06915
		0.906754
		1.81174
		1.69388
		1.06105
		0.757973
		0.771317
		1.42455
		1.30558
		1.17752
		1.36073
		1.39983
		1.72484
		1.85242
		1.17328
		1.28923
		1.87799
		1.10399
		0.861282
		1.40124
		1.27058
		0.859032
		0.952009
		1.39651
		1.1854
		0.9963
		1.92547
		1.28737
		1.54683
		1.28635
		1.71932
		1.24282
		0.744865
		1.30416
		1.52101
		0.888336
		0.805702
		1.11732
		0.898727
		1.49954
		1.32912
		1.40604
		1.23302
		1.35786
		1.47728
		1.59945
		0.956345
		1.49926
		0.856997
		1.97965
		1.41243
		0.929871
		1.39136
		1.06927
		1.24599
		1.05185
		1.4615
		1.83979
		1.17575
		1.93531
		1.90803
		0.748985
		0.95549
		1.32479
		1.58141
		1.58994
		1.00818
		1.45715
		1.91216
		1.56865
		1.04636
		0.731943
		0.704636
		0.826515
		1.43314
		1.84249
		1.02392
		0.903456
		0.88942
		1.59015
		0.72905
		1.4911
		1.23228
		1.38921
		1.64839
		1.11384
		1.85802
		0.756452
		1.09461
		1.46052
		1.42996
		1.12477
		1.80997
		1.2031
		1.82597
		1.32664
		1.16788
		1.4385
		1.64261
		1.274
		1.30701
		1.70577
		1.26428
		0.884827
		1.21699
		1.59801
		0.941811
		1.38821
		1.28648
		1.19732
		1.55213
		1.49258
		1.33929
		1.92621
		1.70792
		0.91061
		0.974724
		0.749964
		0.964413
		1.13656
		1.81563
		1.41341
		1.81785
		1.29009
		1.74561
		1.09022
		1.73117
		0.762436
		1.36266
		1.55391
		1.71456
		0.950478
		1.75938
		1.88544
		1.11264
		1.49219
		1.24071
		1.23137
		0.907545
		1.23459
		0.886683
		1.04565
		1.12125
		1.90813
		1.00165
		1.47699
		1.17247
		1.34778
		1.18385
		1.7185
		1.47369
		0.820565
		1.27132
		1.18089
		1.39694
		0.797615
		0.703476
		1.90353
		1.2097
		0.769156
		1.46481
		0.80275
		1.26927
		1.98899
		0.98008
		1.03485
		1.32539
		1.63496
		1.10017
		1.91216
		1.60423
		0.899208
		1.94406
		1.34209
		1.31702
		1.31583
		1.64402
		1.23878
		1.05862
		1.51486
		1.1458
		1.35145
		0.79232
		1.86764
		1.98309
		1.29276
		0.931311
		0.793819
		0.916653
		1.59774
		1.52636
		0.874496
		1.49712
		1.71348
		1.02124
		1.69001
		1.60262
		1.14102
		1.08324
		1.05696
		1.27953
		1.37756
		0.93528
		1.32068
		0.97982
		1.43026
		1.44349
		1.84649
		1.92111
		1.25475
		1.43058
		0.77058
		1.48676
		1.43742
		0.896703
		1.26303
		0.980663
		1.44382
		1.25967
		0.804892
		1.92931
		0.74538
		1.76025
		0.774323
		1.91425
		1.34727
		1.18557
		0.996521
		1.56249
		1.92484
		1.26051
		1.32655
		1.24535
		1.33346
		1.26705
		1.84167
		1.11203
		1.34232
		0.943094
		1.81223
		1.0636
		1.40941
		0.777992
		1.39463
		1.33574
		0.979088
		1.13531
		1.78767
		1.0237
		1.71626
		0.967888
		0.794121
		1.69013
		1.93383
		1.5766
		1.25125
		1.43492
		1.29748
		1.50129
		1.38759
		1.34243
		1.22013
		0.829521
		1.29141
		1.39491
		1.00988
		1.35851
		1.02063
		1.31076
		1.12781
		1.0999
		1.17282
		1.08565
		1.2999
		1.5268
		1.6719
		0.888927
		1.10419
		1.02853
		1.56868
		1.70434
		1.3568
		1.31108
		1.09874
		1.28574
		1.57449
		1.27879
		1.24303
		1.13509
		1.8176
		1.40988
		1.35979
		0.823559
		0.913704
		1.91019
		1.78907
		1.70773
		1.81904
		1.65223
		0.904438
		1.70932
		1.26601
		1.30922
		1.3543
		0.922061
		1.72263
		1.92682
		1.42446
		1.25012
		1.27995
		0.958542
		1.43071
		1.24175
		0.956303
		1.48897
		1.36459
		1.49305
		0.845512
		1.19179
		0.832001
		1.59517
		1.24524
		1.73161
		1.03708
		0.96768
		0.792992
		1.60406
		1.93237
		1.72898
		0.903435
		1.8005
		1.40953
		0.929577
		1.40776
		1.28289
		1.7761
		1.4683
		1.88025
		1.69979
		1.64698
		1.63646
		1.13314
		1.14386
		1.7672
		1.21167
		1.50661
		1.27264
		0.724411
		1.74212
		0.828751
		1.08859
		1.61435
		0.892921
		1.73538
		1.8243
		1.70587
		1.37539
		1.19325
		0.92701
		1.17102
		1.64906
		1.32063
		1.32787
		1.19156
		0.938329
		0.959984
		1.21628
		0.981682
		1.09017
		1.85763
		0.989052
		1.38833
		1.68303
		1.14196
		1.33311
		1.67341
		1.29544
		0.957535
		1.89728
		1.0074
		1.68074
		0.997517
		1.86505
		1.99396
		1.21427
		1.01903
		1.53994
		0.685216
		1.51567
		1.63769
		1.17612
		0.907372
		1.3903
		1.26518
		1.10836
		1.60248
		1.78048
		0.890076
		1.46175
		0.924479
		0.837727
		1.58808
		1.53594
		1.37337
		1.3638
		1.07771
		1.52817
		1.3746
		1.39985
		0.948734
		1.39878
		0.844376
		1.22756
		1.6387
		1.29443
		1.68892
		0.97301
		1.2867
		0.903215
		1.55645
		1.31768
		1.77644
		1.78328
		1.35748
		0.869948
		1.00237
		1.00665
		1.39181
		1.07592
		1.20433
		1.8868
		1.13129
		1.37206
		1.07901
		1.22863
		1.73464
		1.19453
		1.0335
		0.9105
		1.72296
		1.41297
		1.87915
		0.843301
		1.68634
		1.11171
		1.07939
		1.37537
		1.32059
		1.49867
		1.35495
		0.895551
		0.932961
		1.82313
		1.6714
		1.38475
		1.69271
		1.10079
		1.65992
		1.59179
		0.951485
		1.58064
		1.03933
		1.39445
		1.01916
		1.6838
		1.44982
		0.920628
		1.42254
		1.39193
		0.807453
		0.916983
		1.47312
		1.02258
		1.15923
		1.50672
		0.911633
		1.39769
		0.91188
		1.59211
		1.36418
		0.739655
		1.60494
		1.31839
		0.971153
		1.73304
		1.52774
		1.25784
		1.45068
		0.977207
		0.981335
		1.49249
		1.58372
		1.3646
		1.03509
		1.90885
		1.23175
		1.52119
		1.02855
		1.0135
		0.808487
		1.61477
		1.66036
		1.29398
		1.26475
		0.742157
		1.77341
		1.50059
		1.7161
		0.731546
		0.746354
		0.78948
		1.72773
		1.21872
		1.02603
		1.24645
		1.94958
		0.954308
		1.3482
		0.792576
		0.935814
		0.80941
		1.10527
		0.916672
		0.797195
		0.791661
		0.86416
		0.823492
		1.42958
		1.01371
		1.70126
		1.04547
		2.20627
		3.05862
[truncated: 1,228 more rows]

## Sheet: Figure 2-figure supplement 1D
DMSO	Tg	CCCP
0.798821	0.806186	0.769222
1.21474	0.752292	1.15787
0.95835	1.62861	0.629048
1.82632	1.45292	0.799069
1.67568	2.19358	0.698918
4.44562	8.16668	0.671707
	4.23005	1.00342
1.30807	1.40008	1.58615
1.50842	1.58298
	2.44061	0.659306
0.591128	1.88857	1.09921
1.91479	2.78426	0.615673
0.771265	5.55242	1.07518
0.819514	1.27546	0.822824
0.882174	5.54373	1.95177
2.36682	0.951452	0.713789
4.90252	0.942954	1.00243
2.21345	1.43933	0.735233
1.52882	5.90925	1.04727
2.51216	2.27012	0.900261
1.3941	1.23251	1.2674
1.55032	7.86248	1.11208
2.55699	3.24839	1.09568
1.31959	5.77056	0.815646
		0.533499
3.96942	4.0046	0.493258
0.869143	0.996306	0.468872
	3.73544	1.32181
1.66269	3.37605	1.99023
2.36379	2.91916	0.483577
	1.58134	0.891288
1.15059	0.88607
0.786126	2.49878	0.77788
1.20956	1.1301	0.732874
0.81752	2.65841	2.23702
	0.808953	0.665455
1.81579	4.97895
3.11053	4.86608
1.19631	1.97756	1.0416
1.11437	3.30758	1.60763
0.63317	2.34524
	4.93391	0.696067
	1.01901	0.615704
1.264	0.8883	0.913397
2.2228	3.56798	1.03141
2.93544		0.805568
0.959082	1.40852	1.34912
2.73059	1.51332	0.935418
1.33934		1.3268
1.8558	6.78955	0.541132
		1.1365
2.76549	9.05317	0.885641
1.11628	1.34665	1.37214
0.86973		1.72583
0.77734	4.03839	1.04037
1.27232	3.33611	1.24031
4.02215		0.649686
1.6111	6.33085	0.650838
0.988391	1.58568	1.28068
0.572794	3.10557	0.671773
4.16449	1.93442	1.29112
0.893309	2.3173	1.13036
5.03436	1.52452	0.739048
1.72005	1.76848	1.2033
4.37356	2.81388
0.59734	2.35931
0.732948	3.53265	0.610414
1.34844	1.40178	0.838914
1.41936	5.23214
4.86527	2.04254	0.711389
1.56949	1.61212	1.51941
1.16634	2.08592
	1.50827	1.09422
2.28468	1.86097	1.65401
2.77291	1.6541	1.36341
1.57317	2.22194	1.10294
3.84709	5.42474	0.959566
1.89871	3.29807	0.849359
1.03189		1.56933
	1.42374	1.191
1.37719	7.28612	2.14162
1.08292	3.33099	0.634993
2.94386	4.80093	1.45146
5.03533	2.16849	1.00815
1.35583	1.28727	0.511815
3.78113
1.40188	1.62851
	3.98887	0.761075
2.64944	1.43063	0.638823
	6.14157
	1.51578
5.23745	1.65744	0.778364
	3.05433	0.573491
1.49392	4.59251	0.542472
1.35598	2.56012	0.610017
2.37063	1.89384	0.991923
1.26259	2.29274	0.929344
4.86018	1.64559	0.739187
0.879479	1.4828	0.778843
1.59013		0.591152
1.12759	1.52813	0.875219
1.26749		0.476044
2.70554	3.47765
2.7214	1.39796	0.756437
1.23374		0.941795
0.752404	1.85529
1.37524	2.26075	0.871406
1.35334	1.65635	0.822895
3.498	1.45687	1.64625
1.18341	1.5896	0.956963
0.772113	3.48043
4.18378	1.3058	1.01975
2.08137
3.85408	2.43705	0.660249
2.59935	1.40362	1.05127
1.2276	4.55335	1.1254
0.982123	6.43318	1.57702
1.60399
	1.42357	1.88424
3.47383		0.583411
	1.36057	0.710072
	3.07852
2.86724	5.00101	1.79484
1.93652	1.62041	0.856507
1.43587	3.84106	0.978459
	6.97358	0.927451
1.7098	1.6113	1.0882
3.67364	1.771	0.774573
1.51014	2.33149	0.733302
1.29154	1.83606	2.12657
2.66851	2.54534	0.653632
2.09727	1.56374	0.810241
2.15036	4.58588	1.04337
3.65283	1.44823	0.563666
1.37255	1.51645	0.655824
2.25629	1.60335	1.81017
1.76463	6.24543	1.36726
0.934825	2.10381	0.83693
3.30327		0.661705
1.54928	1.6463
		0.54763
1.07905		1.10176
1.04328		0.834989
	1.84077	0.519568
2.14655	1.97574	1.95158
0.992906	2.15584	0.72714
	1.55888	1.64765
0.742006	1.38436	1.20322
1.26454	2.82754	0.954099
0.843832	4.49204	0.816778
1.93762	2.50763	0.904007
1.16233	2.28148	1.7583
1.62628	2.58178	1.01712
		1.58572
0.788268	3.09643	0.545213
0.914444	1.48354	0.870622
2.98117	1.34518	0.768584
1.95711	1.36951
	3.37966	0.590799
0.980375	1.56119	0.626344
3.42951	3.80004	0.834421
5.08365	7.85627	0.604715
2.43742	5.55399
1.05614		1.36507
1.51761	1.93748	1.10506
1.20682	4.40313
1.3862	1.47924	1.18911
0.954019	4.9286
1.01993	3.09342
0.909274	2.51662	0.617492
4.4088	1.25893	1.61338
1.11072	2.39414	1.66206
1.91556	2.87683
0.966114	2.37731
0.76144	8.26234	1.43456
0.949281	1.53044	0.541834
1.83386	4.47193	2.0977
1.00513	2.99463	2.30555
	7.74712	1.27572
1.42427	3.10094	0.541063
0.833697	5.2813	1.81593
1.5522		0.85099
2.15066	2.20821	0.556644
1.75012	2.02737	0.919494
3.07401	6.78628	1.06733
0.953653	5.06396
	1.2991	0.607439
1.60963	2.63399	0.837142
1.11732	5.3354	0.926203
2.16509	1.92557	0.693414
0.977773	1.95224	0.533468
1.30464		0.906473
5.22604	2.06548	0.639776
1.1115	2.422	0.654002
0.749736	3.10094	1.74927
1.54037	1.22617	0.980176
		1.25351
0.910717	1.95065	0.497396
2.56712	2.30682	1.98061
2.13883	1.90196	1.03905
2.7592	6.89631	1.08653
	1.24402
	1.45374	2.05205
4.01124	1.53226	2.20434
2.21934	2.96023	0.712893
	1.22732
0.942043	1.60586	1.00793
3.07857	5.0212	1.17938
2.37483	1.60945	1.02616
	1.17246	1.14305
2.95417	1.71019	1.66455
3.71756	4.11678	0.899359
2.36372	1.61992	1.00222
1.83098	1.12637
1.61669	4.92628	0.760865
2.42183	1.33931	0.923159
0.798394	1.72747	0.902474
1.62135	2.76637	0.940242
0.711852	1.85633	1.66101
1.11424	2.08856	0.869278
1.86226	1.21232	1.22458
	2.19254
	2.71997	1.39987
3.04323	2.21807	1.12651
3.64522		0.482116
2.7189	4.71925	0.857158
	2.65011	0.718227
1.24045	1.77019	1.09017
	2.20717
1.38562		0.721608
	3.63749	1.02331
1.51292	4.4458	0.985908
0.957639	2.89151	1.53452
3.2362	4.89638	1.04153
0.939657		1.10784
5.1135	1.86389	0.85621
3.30606	2.10974	0.762026
2.71397	1.30045	0.727126
	1.53969	0.561381
2.48286	1.6208	0.920251
3.079	1.35324
0.760615		1.48279
3.64192	1.81597	0.583879
1.71696	1.96108	0.603443
4.77391	2.3714	0.994376
1.47427		1.04209
2.32757	8.26312	1.27187
3.10748	3.50978	0.665427
5.06873	2.16029	2.10539
0.793429	4.70676	0.790525
3.07748	1.97576	2.00242
2.80138	1.80495	0.84168
0.959309	1.15733	0.814594
1.4725	1.90101	0.711551
3.12096		1.76117
	5.38336	2.19831
1.41848	1.91469	1.07087
1.62663	3.05048	0.628884
1.15752		1.48411
0.930009	1.54891	0.870103
0.991892	1.2916	0.81098
0.990699	1.36075	0.505765
2.76758	1.21481	1.2136
2.05512	1.16798	0.987369
1.24107		0.866246
1.14038	5.55637	0.473777
1.3744	2.3135	2.06605
1.86601	2.41032	0.55997
2.31427	1.31155	0.760878
0.7122	3.0311	0.71665
1.87261	4.11169	0.67833
1.64454	5.80483	0.703612
1.93506	1.7775	0.811333
1.46609	2.08697	0.846348
2.55005	3.78555	0.79525
2.75433	1.16161	0.81545
2.60044	4.20043	2.08218
3.9381	1.93119	2.04196
2.55198
1.87579	1.3971
3.07664		1.04428
4.82566	4.29172	2.01788
1.14921	1.30104	0.653488
	1.88765	2.17633
1.52956	1.76001	1.44841
	1.43241	0.523365
0.861422	1.39053	0.492086
2.18423	2.26283	0.965193
0.960422	1.78538	1.25303
3.51355	4.02463	1.14805
1.64111	4.67189	0.546938
0.733343	1.6161	0.505079
2.23242	1.7658
2.10044	2.58451	0.854986
3.30288	2.78779	1.94844
3.76781	1.46548	1.04469
0.841178	1.49871	0.954442
0.979648		0.831549
		0.671008
2.05091	3.22956	0.703481
	4.85896	1.3726
2.39781	1.89495	0.676269
	6.78381
0.771029	1.35706	0.555063
0.603614		0.799143
1.26761	6.25162	0.885434
4.14491	8.07102	1.19303
	3.20467	0.636047
1.81147	4.73856	1.1307
4.23457	2.16017	0.686628
1.05488	1.57176	1.83922
2.1761	1.55256	1.04702
	1.81492	0.511451
1.51588	2.24735	0.49391
0.98865	1.45727	0.556094
1.21761	1.77137	1.30851
2.30313	4.86883	2.26592
2.57273	2.38848	0.971442
	1.73167
	1.7018	1.13121
2.30369	4.30755	0.921064
3.64747	3.98131	0.899636
1.16907	2.72112	1.4899
1.21943	6.6551	0.518231
1.44665	2.11434	1.26436
1.17389	1.38021
0.938292	1.81426	1.05503
0.901727	1.34996	0.470025
2.62604	4.92446	0.484959
	2.65139	1.08602
	3.9372
0.871917	2.25734	0.508292
2.22889		0.712615
1.66645	2.02108	0.623539
0.964481	1.36606	1.67859
1.10863		1.42834
1.81579	1.64631	1.35149
4.21896	1.87978	0.797407
1.152	1.53198	1.55855
1.48451	1.29241	0.766741
0.992772		0.803695
1.30265	3.55061
1.36919		1.13167
0.994061	8.35749	0.531014
5.30495	3.92109	0.922842
1.46122
2.24567	1.69188	0.569491
2.05783		1.34793
2.45267	1.51957	2.03066
3.00699		0.540467
	2.66135
	1.82079	1.31876
	1.99145
		1.58536
2.73594		0.578038
1.34514	2.44178
1.11497	1.98685	0.845346
2.37317	1.40026	1.07835
1.46574	1.68703	1.07968
	3.47105	0.514471
1.62118		0.476347
0.822408	5.66494
		0.547596
0.596767	1.34824	0.889035
1.59477	2.63589	0.529296
1.90582		0.547474
	3.65302	0.955052
1.58953	7.40401	1.22088
2.86935	2.18662	1.03429
1.54196		1.06814
1.07381	1.3929	1.12873
1.28569		0.932203
1.01627	1.74695	0.867319
		0.585783
0.920565	1.97657	1.19371
2.18091	2.02844	0.821008
2.49515	3.7502	0.874826
2.31589
1.04186		0.488207
1.61996	1.25457	0.859157
0.694216	1.6653	0.606915
0.77699	3.8235	0.832525
0.979149	7.38066	1.46904
	2.51748	0.874546
4.89277	3.14603	0.569342
1.59752		0.745329
3.03986	7.16997	1.5332
1.14693	1.45537	0.601752
1.06648	7.19752	1.3781
1.13764	4.40537	0.657015
1.18788	6.59109	0.519832
1.35807	1.44691	0.695474
3.87684	4.55868	2.26102
1.25429	2.19095	0.925498
0.828717	5.84945	1.19308
	1.32476	1.39452
1.70822	1.44408	0.772366
1.5848	2.37514	0.530896
0.744519	1.96109
1.23016	1.43049	1.38319
0.696122		0.949516
4.46869		1.79681
		0.824296
1.49756	3.66239	0.814154
2.13662		1.04161
1.90047	2.24612	0.529458
2.88049	1.94413	0.913825
	2.17623	1.30228
	2.72064	0.665283
2.95684	7.11782	0.762858
3.00391	2.02131	1.46277
1.2591	6.05378	0.560857
0.784613	5.45643	2.07859
	1.59197	1.20684
2.19002	1.45959	0.604855
4.54355		1.39717
1.12074	6.23004	0.493074
0.718186	1.6929	1.33337
1.26182	3.84923	0.653623
	1.58547	0.978364
0.763519	4.33515	1.19357
	7.77761	1.32351
1.6469	4.47755
1.91417	1.77879
2.56362	3.2748	1.37822
	2.06074	1.48033
2.01549	1.51031	0.503239
	5.22311	0.511417
1.24528		0.760646
2.51998	3.2792	0.592914
2.37783	1.97844	0.630377
1.00268		0.509646
2.45104	2.11338	1.28086
3.14995	5.46281	1.04519
1.19161	1.95947	1.27465
2.02681	6.56719	1.02889
3.09859		1.25596
1.40312	5.30783	0.821332
1.60718		0.967215
0.8253	6.37789	1.47327
2.60741	2.16628
	1.51913	0.781852
1.79405	3.65346	0.668218
0.917427	1.98335	0.894303
3.0766	1.56671	1.96117
4.67605	2.77829	1.65323
0.931012	1.19836	1.62973
	2.0374
0.995935	6.70708	1.61027
0.918444		1.72023
1.31292
2.76637	2.27737
0.9884	8.93611	0.445983
1.10819	1.44165	0.881603
0.797859	2.02484	1.59595
1.01033		0.814527
1.45158	5.36631
0.734797	2.75759	0.786159
0.853674	2.89668	0.804272
3.52502	4.06557	0.953578
1.78565	8.72383	0.897683
	4.3286	1.19055
0.938871
1.60824	2.64968	1.21981
2.70755	3.79786	1.35143
4.47238		0.817836
1.89408	6.84919	1.19304
	3.01575	1.85162
		1.79004
3.61733	1.41909	1.72049
	1.78384	0.710966
1.43106	1.43622	1.24128
1.06107	4.85322	1.03068
0.955981	3.66403	0.693119
2.15335	1.94374	1.26569
2.68882	1.52305	1.07022
2.10757	1.33636	0.915474
2.51026	4.82756	0.89013
	2.31133	0.835175
1.21672	5.31611	0.794606
2.93276	5.01521	2.10499
1.51843	1.35899	1.071
2.01113	2.68516
	1.49692	0.684207
1.03657	2.64566	0.738037
5.0131	5.36716	0.726519
1.40309	2.63879	0.862927
0.993671		1.07946
1.61098	1.5069	0.825
2.28777	2.62495	0.86754
1.38729	6.25858	0.631089
1.48593	1.42412
0.843861	2.01093	0.819069
2.03255	1.7157	1.28413
	7.14577	2.13171
1.30829	1.47617	0.851694
1.22366		0.930338
1.80617	1.5888	0.881302
		1.54902
4.01196	2.17337
1.51672	3.99931	1.78586
1.77815	7.00559	0.976855
2.64256	1.2458	1.0886
		0.689377
1.92493	6.48227	1.19505
1.30201	1.74955	1.26468
1.86873	1.86453	2.26931
2.29214		1.8479
0.849203	2.71465	0.746922
2.14835	5.72336	0.527794
1.64396
	1.46529	1.8161
2.79589	1.57226	1.36598
0.505093		0.588622
4.16904	5.93359	0.527103
1.05541		0.706161
1.04172	6.13941	1.0969
2.61771	2.00388	0.622816
1.96919	4.4421	1.75354
1.09768	1.54391	2.1961
	1.76358	1.15609
3.15263	4.40765	0.54236
1.75963	1.36829
2.82687
5.1535	6.00041	1.22431
2.11808	1.93564	0.597085
1.41994	3.65137	0.953136
	3.07238	1.7407
2.82495	1.62859	0.989555
2.91313	1.3899
0.731628	2.07244	0.967412
	3.89493	0.46602
1.27897	6.48467	1.03551
	1.74853	0.854954
1.04207	2.24252	0.741238
		0.944166
2.00931	2.18421	0.854666
5.00406	4.4052	0.890519
	4.94308
0.851827		0.775544
2.51784	6.66666	0.547088
3.34121	6.44089	0.835627
0.917786	2.51705	1.31259
3.13017	2.18209	1.65989
1.691		0.900725
0.859892	2.38697	0.607946
4.17976	3.14211	1.17076
0.78649	1.87841	1.21709
4.7416	3.58398	1.69741
1.29631	1.41367
0.865924		0.856925
4.3931	1.81411	0.861272
1.55143	1.45406	0.80703
1.07301	1.95948	0.670853
5.17951	2.3858	1.21318
1.09164	8.93312
3.28848	4.6249	0.547362
1.07563	1.45274	2.1313
3.56461	2.12927	1.1659
2.44571		1.07564
0.684822	1.53778
0.904882	1.67239	0.507577
	1.78965	0.667545
1.70752	1.84647	0.627282
1.4265	2.93317	0.765724
	1.6632	1.08998
1.47408	2.39555
0.706239	2.76805	1.39487
	1.5835	1.57909
0.90254	4.10893	1.367
	6.3533	0.624065
1.43304	2.47204	0.63683
1.71342	2.23273
2.56678	1.30464	0.558713
1.34126	3.82528
1.96351	1.29607	0.586734
1.01661	2.21441	0.5266
0.878376	2.56589
1.44797	1.77203	0.768912
	2.69302	0.910989
1.62583	2.15447	0.836923
	1.87057	0.842515
4.82579	2.11155	0.719093
3.59635		0.456437
1.61878		0.461851
5.12852		0.503531
1.77706	5.59027	1.69093
		0.701953
0.956934	2.00077	1.33684
3.90876	8.61482	1.00744
1.94586	1.60104
3.41965		1.71205
2.49451	4.32866
		0.482599
2.45915		1.92759
3.00004	2.21509
	1.57899	1.51569
2.14744		0.563338
2.57933	1.61783	1.27908
	5.19948	0.464157
2.32161	2.51573	0.787568
2.5013	4.79224	2.02508
1.02718		1.55022
4.43106		1.39225
0.991006	3.0009	1.76968
2.94525	1.56015	1.71073
2.56356	2.57696	1.24183
	5.53953
2.97902	1.41196
1.28806	8.64424	1.29341
2.07565	1.94987	0.702282
1.30881	2.51661	0.794064
3.42942	3.147	0.640867
1.17652	1.86891	1.73181
2.10637	3.70395	0.95469
2.38108	2.90962
1.71875	5.06755	1.11585
0.757423	8.04651	2.20567
0.882061	1.3646
0.707449	6.97767	1.065
1.1377	1.69265	1.27878
1.03037	5.31627	0.74054
0.846933		1.73511
0.97286	1.80875	1.03193
2.95015	4.6211	0.749403
1.63575	2.5664	1.06339
0.869482	6.79384	0.684193
1.1329		0.986718
3.01648	3.18118	0.571406
1.68783	3.48155	0.935406
1.74097	2.59759	1.74633
1.97995	2.35522
1.51219		1.22788
1.05079	1.50343	0.634277
1.32668	5.86365	1.14662
2.27098	4.70789	1.13905
5.31241	1.87324	0.995627
1.32874	2.042
1.80031	4.71784	0.937618
1.85847	6.59027	0.763889
0.970234	6.06128	0.874256
1.39237	2.31773	1.3443
4.65012	3.99125
		0.907625
0.767828	4.68143	0.537498
3.06143	2.3464	1.05194
1.28241	3.92829
		1.75206
3.21084	4.54565	0.75152
	4.79719	0.810454
0.873433	1.49281	2.09481
1.21587	2.1708	2.09117
2.22788		1.38654
1.02392		0.701253
1.45456	1.05368	1.52857
3.6862	3.42873	1.49967
0.826029	1.91101	0.517323
1.37022		1.47265
1.22523	5.77864	0.713067
4.69825		1.84099
0.874636	4.63434	1.2696
2.1891	2.90662
1.68812	2.11148	0.7637
0.55379		0.983082
1.35917	8.31092	1.20515
2.82482	2.1744	1.21707
1.09803	3.4757
	2.29183
1.09534	2.40933	1.64352
0.677102		1.76216
4.71783		0.721781
0.807861	4.54251	0.611238
1.34057		1.96986
2.44856		1.28297
0.946368	3.28628
1.12266	1.34804	1.09731
3.45662	4.77727	0.785052
0.765652	1.85304	1.42345
1.44686		0.758898
1.44465		0.85404
1.49675	3.31645	0.807895
4.12599		0.516449
0.865565	1.64968	0.790063
1.03075	1.87314	1.57912
1.08585	6.10596	0.862778
0.917969	1.87972	1.00798
1.77681	1.69741	0.635432
	7.74642	1.77291
1.12114	2.43399	0.520994
0.986317	5.69393	0.571501
4.18421	4.26941	1.26431
1.56319	2.60378
1.34174	4.00426	0.573074
3.40249	7.70793	2.05622
0.776326	1.7558	0.668493
0.895576	1.50697	1.3764
0.866507	2.07044	0.569331
4.39766		0.484777
1.8256	1.49275	1.65196
0.730659	2.56518
1.66855	3.92631	1.83086
0.80554	3.37059	1.31316
3.14031	4.67559	0.813943
	1.55858
1.5052	1.52053	0.794244
1.26127	2.56059	0.704079
1.33745	1.79363	0.627742
		1.91517
1.49087	2.77761	0.635696
1.03124	2.51835	1.02605
0.965711	4.5369	1.90393
1.71176	1.84917	0.559159
3.76688	1.94042	1.1058
2.51792		0.730673
1.61754	3.84963	0.467805
1.2957	3.20206	0.864088
	1.69732	1.20947
1.82461	3.96582	1.50337
1.12894		1.19479
1.16281	3.0471	0.546359
1.02531	3.46972	1.70973
2.82218		0.461075
3.29934	3.531	0.611048
0.789672		0.720096
2.77809	4.45403	1.33192
1.16249	2.49061
1.80702		1.05821
0.769311	3.55369	1.06588
	2.79347	0.808049
0.928647	1.69894	0.972391
1.23597	1.04264	1.0266
2.31731
0.687681		1.08908
2.11849		0.727736
	1.4108	0.860912
	3.55234	1.01459
3.36147	4.7185	1.89341
1.16658	1.42865	0.588783
0.939405	0.967117	0.756142
0.689337	5.21617
	1.875	0.828641
2.39527	1.37558	0.712907
2.58926	8.42459	1.34068
1.24475	4.53583
1.02446	2.5883	0.99798
1.1837	1.86054	0.765424
	6.21561	0.734828
4.10518	1.63966	0.989957
1.44074	5.86903	0.74823
0.875184	2.60553	0.513359
2.78403	2.74245	0.9878
1.08673	2.15434	0.695268
0.98351	2.01673
2.57257		1.72652
1.75163	1.23131	0.584212
5.00556	6.57177	0.851855
1.31789	3.01689	0.457007
2.04474	4.53699	0.968301
2.03528	3.31054	1.95775
1.60666	6.82058	0.461984
0.808346	2.93358	1.75435
1.18371		0.522804
1.8177	7.41841	1.61926
1.88733	3.1867	0.558646
1.12845	5.16508
1.50097	2.39003	1.01688
	1.53042	2.01471
1.11221	1.19545	0.64144
2.93097	4.13937	1.20891
1.03401	1.84179
		0.560175
1.68148	3.57384	0.476757
		1.321
	2.264	0.868923
0.918732	3.62937	1.00565
1.83046	1.46555	0.95901
1.30146	1.95352	0.616289
3.66161		0.700823
2.58604
4.09613	1.2554	0.702688
	1.16276	1.11311
1.40998	1.48079
2.9416		0.899984
	4.38732	0.555926
0.702908	1.35805	0.779399
		1.03949
	1.61989	1.11986
	2.6618	1.14066
	2.01683	0.911909
	2.26178
1.37909	1.46046
2.2888	2.43731	0.625164
3.93618	3.82014
4.12492	1.4717	0.763045
1.30617	1.96157	0.531904
5.25023	2.96491	1.80118
1.78448		1.62672
1.14824		0.651559
1.20568	2.44483	1.87636
4.95874	1.54336	0.730868
		0.634888
0.662641	1.75722
3.289	4.46612	0.477609
1.52283	3.25537	0.778311
0.92046	2.25053	0.67477
0.856792	2.55423	0.537676
4.17825
1.41903	5.66592	0.870475
	9.1651	1.04762
1.05017	3.53145	0.805726
2.03232		0.938277
3.41781		0.574644
1.74208	2.75837	1.03792
1.45383		0.644059
0.930484		0.818058
1.11328		0.743027
		0.972353
2.08068		0.822954
3.55742		1.27016
0.916096		0.668311
2.0019		0.540362
		1.03236
1.19615		0.93327
0.912422		1.49314
2.87196		0.919741
0.864108		2.14242
1.28319		1.15712
		0.565693
0.843176		1.18462
1.2688		1.06609
4.33136		1.83499
2.19364		0.63903
2.26538		0.865512
		0.825694
0.640849		1.15946
0.768364		1.00621
		2.16992
1.53645
0.852862
1.02995		0.868075
1.38816		1.07223
0.808016
1.43051		1.10005
		0.833882
1.18281		1.06767
1.74556		0.699523
0.94338		1.65579
1.31575		0.898611
0.957232
1.73975		1.18578
1.03936		1.70256
1.67225		0.459918
1.36318		2.28402
		0.539567
2.69149		0.809277
1.14068
1.62626		0.780082
0.579842		0.80545
3.9877		1.33869
2.19219		1.15123
0.636802		0.825644
		1.05453
2.73856		1.05293
1.3096		0.838136
0.984785		1.04384
1.32986		0.835831
1.03536		1.02275
4.78776		1.17034
		1.05163
		1.50455
1.18263
1.04481		1.89348
1.50134		0.593979
0.763491		0.542393
1.88847		0.873206
1.66199		1.72342
1.05648		1.14175
1.64783		1.04238
		1.35449
2.14279		1.69442
0.920486		0.758575
3.25782
1.94638		0.408062
0.841388		0.810866
1.10887		0.86699
1.17187		0.943546
4.95749		0.485578
1.41455		0.906918
0.866592		1.36299
0.832255		0.458643
4.38245		0.921316
2.35945		0.436587
1.10755		1.22546
1.0814		0.577559
2.91503
1.17913		0.820722
1.62688		0.839814
0.964704		0.657483
1.48278		1.04625
2.67928
1.54886		0.717193
2.9588		0.559237
5.09295		0.775369
0.895871		1.16644
1.96017		1.99344
0.76657		0.680818
2.80655		0.500344
1.11401		1.83389
1.37717
2.40095		0.576811
2.12771		0.761712
2.37914		0.903117
1.61553		0.968468
1.05772		0.836595
0.742518		0.888277
		0.484349
1.38238		0.465184
		0.704378
1.7098		1.53198
1.82006
		1.20582
2.36867		0.57185
2.90571		1.21138
1.65558		0.678546
		0.760414
4.98196		1.06063
0.940741		2.0021
2.72198		0.718424
4.43159		1.38848
1.65569		0.64166
1.80805
		1.01203
1.51042		0.95135
0.922365		0.918597
0.866129		0.893703
		1.00394
4.91317		1.46344
2.0653		0.907908
2.06095		0.40183
0.839824		0.775241
2.42741		0.944415
4.7245
		0.505795
2.71866		1.10086
1.46756		0.979713
1.39585		0.821656
1.87224		0.644927
		0.588899
4.34131		0.431163
0.824376		0.915294
1.16206		1.48514
0.945611		1.72463
		2.25351
5.29901		0.488632
1.44624		1.65833
2.44938		0.833472
2.99895		0.441858
4.64567		2.0507
0.619314		2.1424
3.25807
		1.03976
1.09983		0.649064
1.17238		0.973803
3.16413		0.967058
		1.13786
2.36738		0.75105
0.859475		0.893151
4.33436
		0.591238
0.657346		0.637185
		0.923895
1.04148		0.515715
1.13141		1.15926
2.92554		0.409369
1.65798		0.890502
1.28016		0.756267
1.14849		0.581837
2.25635		1.6384
1.94461		1.08423
2.29523		0.931428
2.93534		0.733108
3.76416		0.644312
		1.20916
1.75363		1.62511
1.18713		1.38627
3.19888		1.1059
0.778594		0.799537
4.05569		0.689071
1.09906		0.599762
0.771481		0.841306
0.854324		0.949201
3.33164		0.721548
1.21442		0.851804
2.65929
0.989559		0.932365
1.90995		0.635781
1.12217		1.01414
1.08175		1.39749
1.36469		0.621654
3.30757		0.720923
1.35472		0.442204
4.33727		1.75819
0.925588		0.408412
4.1656		1.24824
0.734854		1.13786
4.9649		1.02808
0.705604
4.96152		0.973041
0.95371		1.03352
1.54182		1.95749
		1.05836
1.44165		0.675072
		0.672074
1.00007		0.796277
0.844368		0.831026
0.708985		1.40399
2.91885
0.723298		0.92781
2.22462		0.957229
1.45908		1.33163
0.982821		1.48687
1.56674		0.570271
1.38659
0.824287		1.3492
2.23128		0.732671
3.61075		1.12185
1.12566		0.844734
		1.181
		0.645546
0.830106		0.809926
3.1634		0.715952
		1.33232
		1.22561
1.20151		1.74079
1.40917		0.769774
0.87071
1.07125
1.33277		1.11627
		1.41909
		0.856803
1.42951		0.688532
1.51835		1.67355
1.04168
		1.48837
0.981605		0.803049
		0.77325
1.21588		0.65755
		1.18694
		2.25007
2.55726		2.1011
3.811		0.949354
3.90193		0.715972
1.21733		1.48882
0.976549		0.51964
1.99272		1.36099
0.772184		0.475891
1.41366		0.76773
1.5643		0.694984
0.729766		0.533543
2.47883		1.07173
1.77161		0.43055
		1.1298
		0.612343
		1.33337
		0.685506
		0.982465
1.32692		0.790631
1.45516		0.74919
1.84751		1.08411
1.21012		0.420774
1.49991		1.41161
0.623414		0.561767
1.15087		1.67711
1.19916		0.636494
1.36389		0.83265
		0.451252
1.6274		0.69124
1.71522
0.964769		0.910931
0.808384		0.51468
0.664658		1.31499
0.675631		0.748979
1.07874		1.0975
2.48675		0.654114
2.90883		0.71539
4.59759		0.750752
3.28845		0.977922
		0.594683
0.978848		1.33435
1.51484		1.48101
1.58022		0.776052
2.67905		0.931993
1.34424		0.433854
2.05088		1.08231
1.78789		2.24298
0.921197		2.11732
1.78263		1.36119
2.41546
3.17041		0.632345
1.14473		2.27673
1.60811		0.920155
2.62318		1.37814
		1.21923
		0.666454
		0.739906
1.1203		1.06167
		2.2994
0.972539		1.36883
1.12544		0.56572
0.957039		0.434327
2.43491		0.636175
1.17568		0.566199
		0.39527
4.42685		0.910096
2.22381		1.20573
		0.584377
3.0022		0.668904
3.82585
		0.610802
2.68994		0.474044
1.46742		0.799858
0.972647
1.03962		0.398354
1.73663		1.57604
0.991691		1.04529
2.45657		0.649415
2.27275		0.779651
0.584992		1.18809
		1.86266
0.741627		1.94287
2.94066		1.23614
		0.866472
		0.922937
0.821818		0.871594
3.7366		0.473884
0.71257
1.1685		0.53063
3.86248		0.583853
1.05535
1.17769		0.426125
0.776288		0.594752
		0.895245
1.30939		1.55033
5.11431		0.546601
0.951225		1.70513
2.5129		0.74165
		0.77859
2.54007		0.518921
		0.493597
1.74506
1.21089		1.49638
3.32157
2.33606		1.0144
		0.598712
1.26573		0.50222
		0.614635
2.22227
2.69999		1.77386
0.91787
		0.686827
2.26253		0.856819
		1.03176
1.08298		0.491374
1.65443		1.52697
1.43369
1.47816
1.05946		0.748633
1.68547		1.09021
1.63017		1.15802
0.817055
2.73391		0.954403
1.29016
1.23023		1.49921
0.751063		0.504467
1.81323		0.838436
1.30193
1.76986		0.768094
1.23331		0.974219
0.830788		1.07569
5.27992		0.60865
1.33487		0.876792
1.31866		0.65617
1.53042		0.505462
0.851255		1.14363
1.19782		0.754104
		1.52716
		0.829373
1.23962		0.448586
0.791579		1.14674
2.54168		1.19289
0.61318		0.720288
3.30263		1.11154
		0.875528
2.78051		1.90286
0.816956		0.644201
0.889172		0.648447
2.24885
1.09846		1.40471
0.748466		0.969612
1.8334		1.73772
		1.50377
		1.01063
1.77598		1.54809
3.08905		1.51313
0.70203		0.862825
2.71822
3.27508		0.92231
2.43215		0.692203
1.23797		1.33939
1.25744		1.22398
0.934198		1.03695
1.49497		1.38734
0.714225		1.64542
1.96239		0.498
1.33526		0.527262
2.23327
		0.545467
2.13204		0.491697
2.35425		0.831579
3.18751
		0.474702
2.25865		2.26318
2.96693		1.30339
4.94067		0.678511
1.09104		0.672799
		0.941683
1.645		0.404839
3.42989		1.61936
1.8156		1.2027
1.23161
1.96544		0.779647
4.21635		1.06308
0.913159
0.943297		0.469424
		1.67719
		0.576299
0.89492		0.793557
0.928221		1.01631
1.41455		0.494953
0.804912		1.01587
1.94714		0.65922
0.866121		0.7113
1.23876		1.84996
0.891568		0.430015
1.89828		0.793372
2.69334		0.622548
1.11945		2.06906
		0.838913
2.64693		0.861465
0.821288		1.42282
1.10569		1.08279
		0.37069
1.97837		1.2457
0.984979		1.13422
1.0431		0.869627
1.42809		0.570191
0.674924		0.866228
1.02304		0.551347
0.820757		0.539189
3.74198		0.458334
4.91157		1.96199
1.90985		1.91487
2.23279		0.811994
		1.70384
1.90036
1.04858		0.498384
0.830464		0.491545
1.12868		0.632745
1.36267		0.585753
2.20969		0.849876
		0.725426
1.53478		1.60795
1.10448		0.873238
4.48417		0.798732
3.03674		0.738581
1.66809		1.2782
1.24848		1.02052
1.51279		1.32896
1.19225		0.777893
2.01731		1.23127
2.88943		0.525926
1.7228		0.847408
0.763147
1.28895		1.57822
0.977111		0.834239
1.03904		1.12227
1.05431		0.802217
2.1375		1.15555
0.835861		1.0776
0.767735		0.70972
		1.14711
		2.01638
1.83481
5.31539		0.959998
2.03712		1.34074
2.58377		0.603999
1.66102		1.00489
1.52524		0.508658
1.26237		0.760006
1.13481		1.30228
		0.683348
3.30291		0.478288
		1.2208
1.30409		1.27939
		0.787329
		1.90242
5.2962		1.13479
2.67567		0.494685
		1.05058
1.82556		0.556521
5.3221		1.51469
2.48045		0.494143
1.56781		0.936234
3.4761
2.67285		1.6564
0.582291		1.1205
1.29583		0.921517
1.84992		0.826948
		0.527281
2.15565		0.861741
1.43128		0.484374
0.949808		1.22003
4.26301		0.79186
3.40048		0.733228
		0.938567
		1.01792
0.797567		0.617654
		0.61521
1.14802		0.973879
2.82676		1.76889
2.21902		0.926206
1.49127		1.43727
1.63601		1.34725
		0.975561
3.01173		0.52235
1.35711		0.989856
4.13919		0.662576
1.99939		1.62108
1.50793		0.379123
1.46871		0.500444
		1.24544
0.882596
		1.75792
1.1489
1.35419		2.26432
4.06116		0.715099
0.955738		0.366134
3.12742		0.809386
1.79376		0.790767
1.95758		0.936945
1.41863		0.664936
1.08784		1.89989
2.46722		0.588978
1.39989		1.03958
2.79068		0.408658
1.98536		1.23605
1.4066		1.0513
3.51481		0.81398
1.22256		0.646298
1.1076		0.516827
1.28851
0.957283
1.20513		0.692635
0.787019		0.623459
1.69225		0.500782
4.26706		1.32204
2.14029		0.518938
0.947271		0.503506
1.07145		0.841343
0.721358		0.947573
1.47058		0.558627
1.19499		0.965873
1.87236		0.863748
2.33419		0.973864
0.634219		1.31989
1.09812		0.697418
1.64417		2.08244
0.950205		0.664172
3.70266		1.14541
3.13443		0.654479
2.10281		1.19162
		1.77179
1.60481		2.23407
		0.918861
3.09393		0.710049
2.8233		0.95737
		1.0183
1.95578		1.69023
2.83318		0.843902
2.36823		1.36335
1.39766		0.860424
0.660945		0.766533
1.23938		0.439476
1.0963		1.01745
3.48443		1.78675
		0.800031
0.854857
1.25686		1.78148
1.92563		1.07162
0.929592		1.18014
3.99054		2.30056
1.51608		1.67071
1.39994		0.73283
0.939417		0.930124
		0.694404
1.55696		0.624427
1.87979		1.51557
1.59017		0.546216
1.1814
1.18395		0.601588
1.432		0.929535
0.979586		1.61645
2.83315		1.03235
		0.644633
		0.502316
		0.590748
1.21221		0.50436
1.89588		1.4932
		1.1044
		1.02092
		1.22029
		0.959218
		1.01784
		1.5165
		0.877748
		1.49502
		1.05485
		1.77328
		0.813123
		0.820179
		1.51091
		0.727466
		0.424412
		0.50345
		0.930804
		0.496048
		0.543498
		0.739939
		0.716513
		0.499265
		0.563458
		0.891565
		0.69168
		0.95579
		0.433242
		1.1609
		0.761368
		1.71
		1.46047
		1.35889
		1.06475
		0.763779
		0.769672
		0.482018
		0.722044
		0.886936
		1.32717
		0.741865
		0.63289
		0.581641
		0.804448
		0.628136
		0.814467
		0.514052
		0.942955
		0.424404
		1.47365
		1.90167
		0.715697
		0.418889
		0.564337
		0.791425
		0.637643
		0.720291
		1.53611
		0.386842
		0.817151
		1.8814
		1.16204
		0.860424
		0.667433
		1.64623
		0.620755
		0.67034
		1.17555
		1.64855
		0.963498
		1.24367
		1.04244
		0.67582
		0.561349
		0.600673
		1.36811
		1.7732
		0.511153
		1.04784
		1.07478
		0.856242
		1.32936
		0.63025
		0.440025
		0.442451
		0.799899
		0.825821
		1.64647
		0.706148
		1.83037
		1.25579
		1.38763
		0.776649
		1.31704
		0.900042
		1.17265
		1.08934
		1.08293
		1.4287
		0.641868
		0.793914
		1.06683
		1.2221
		0.692101
		0.509789
		0.876182
		0.777888
		1.4617
		0.485596
		0.56794
		0.844591
		1.66204
		1.105
		1.11135
		0.690401
		0.565319
		1.00168
		0.70987
		0.904052
		1.28156
		0.793431
		0.943312
		0.79864
		0.428465
		1.89529
		0.76045
		1.00522
		0.489701
		0.449787
		0.611939
		0.479324
		0.882606
		0.776064
		1.47662
		0.783943
		0.768662
		0.663962
		0.821809
		0.891809
		1.47688
		1.11905
		0.55116
		1.49484
		0.872946
		0.549885
		1.29135
		1.18784
		0.790407
		0.515322
		1.76451
		0.859442
		0.638308
		0.761166
		0.627527
		0.906676
		1.04085
		0.655871
		1.74602
		0.976357
		1.02085
		0.415706
		0.520799
		0.732026
		1.64118
		0.90042
		1.26275
		0.829959
		1.83824
		1.11734
		0.587445
		0.90864
		0.879447
		1.19411
		0.970336
		0.572567
		1.58832
		0.439372
		0.407084
		1.07471
		0.511152
		0.834805
		1.14234
		1.0065
		1.30559
		1.40043
		0.589455
		0.585443
		0.485342
		1.00946
		0.416062
		0.744663
		0.697982
		1.16487
		0.767274
		0.911986
		0.818789
		0.919458
		1.35805
		1.8788
		2.09324
		1.25519
		0.483789
		0.542417
		1.18735
		0.887563
		1.4661
		0.785407
		0.735345
		1.21383
		1.29168
		1.10154
		0.725965
		1.08961
		2.04978
		1.31969
		1.42554
		1.03961
		1.34295
		0.786752
		0.707656
		1.44162
		0.839593
		0.972165
		1.66383
		0.720169
		0.791201
		0.91029
		1.17621
		0.895796
		0.503562
		2.29366
		1.28859
		0.767312
		1.29833
		2.05094
		0.95989
		1.66361
		1.2483
		0.520635
		0.835168
		1.73828
		0.772143
		0.702996
		1.37194
		0.799107
		0.869491
		0.832716
		1.12158
		0.784537
		1.19553
		1.26698
		0.529713
		0.650228
		0.492178
		0.633395
		1.34203
		0.697765
		1.00379
		1.41729
		0.826628
		1.1334
		1.8734
		0.958832
		0.77867
		2.19486
		1.03958
		0.646332
		1.10429
		2.314
		1.13453
		1.02729
		0.503126
		0.761433
		1.0212
		0.99097
		0.972514
		0.528958
		0.962695
		1.17043
		2.03432
		0.76754
		0.819455
		1.71594
		0.862935
		1.23958
		0.804132
		0.531633
		0.708258
		0.548219
		0.59142
		0.69782
		0.957645
		0.592735
		0.858542
		1.35664
		0.817343
		0.712185
		0.61599
		0.965486
		1.23902
		0.838188
		0.480463
		1.33957
		0.758852
		0.743772
		0.955283
		0.454285
		0.394302
		1.48142
		1.46278
		0.959542
		0.72029
		1.24044
		1.48671
		0.483053
		0.828287
		1.77052
		0.457484
		0.835688
		2.10315
		1.00274
		0.574294
		1.04333
		0.58122
		0.795635
		1.25086
		1.73744
		0.895382
		0.552496
		1.13954
		1.15843
		1.52721
		1.03661
		0.746292
		0.489982
		1.27737
		1.24011
		0.723797
		0.678601
		0.820044
		1.79384
		0.967459
		0.731378
		2.16313
		0.589228
		0.851044
		0.758391
		1.6028
		0.762101
		0.448565
		0.9976
		1.00306
		0.866441
		0.524765
		0.487824
		2.1925
		1.17978
		0.60562
		0.914399
		0.865324
		0.507934
		1.13412
		0.796526
		0.952519
		1.25861
		0.587994
		0.956966
		0.833189
		1.10273
		0.767098
		2.03167
		0.592422
		0.610665
		0.697371
		0.85686
		0.604742
		0.802133
		0.596642
		0.821897
		0.831411
		1.10145
		1.06103
		0.817996
		0.937948
		1.66178
		0.427096
		0.927552
		0.896168
		0.495708
		1.19013
		0.843388
		0.531287
		0.817037
		0.846647
		0.425786
		0.963081
		0.434776
		1.12534
		0.426185
		1.21647
		0.950276
		0.725338
		0.757282
		0.580108
		2.04977
		0.844668
		1.11378
		1.03034
		0.817146
		0.876409
		0.646564
		0.730686
		1.31732
		0.68524
		1.11072
		0.621836
		1.21362
		0.733939
		0.578551
		0.972449
		1.25779
		1.10414
		0.562422
		1.01595
		0.798796
		0.438857
		0.874529
		0.861341
		1.756
		0.552615
		0.688906
		1.04208
		0.603627
		0.960809
		1.81544
		0.547953
		1.11539
		0.458848
		0.952463
		1.11534
		1.73085
		1.12773
		0.913724
		1.24458
		0.812919
		0.806712
		0.802967
		0.936893
		0.83241
		0.802752
		0.69054
		0.477131
		0.851478
		0.800025
		1.40157
		0.571994
		0.869832
		0.628795
		0.84214
		0.668235
		1.26431
		0.677594
		0.810515
		0.583211
		0.775734
		0.877457
		0.975916
		0.48428
		0.517545
		0.62813
		0.988448
		1.01894
		1.50659
		0.875657
		0.654204
		1.84519
		0.681645
		0.900458
		0.833374
		1.48114
		0.745925
		0.813452
		0.677745
		0.977338
		1.06487
		1.67943
		0.798027
		1.8534
		0.833097
		0.472267
		0.633732
		1.19585
		0.9783
		2.20993
		0.994963
		0.897074
		1.03201
		0.532437
		0.919291
		1.76542
		1.80617
		1.3985
		0.675863
		0.865017
		1.71083
		1.37989
		0.70298
		0.448376
		1.00814
		1.02112
		0.779968
		1.47274
		0.787925
		1.19891
		1.58602
		0.797735
		1.63243
		1.08483
		1.56454
		0.553841
		0.94846
		0.719425
		2.28482
		0.583001
		0.902689
		0.898589
		1.33356
		2.08713
		0.804932
		0.488811
		1.24137
		0.712504
		1.90138
		1.2699
		1.25985
		0.514871
		0.868301
		2.15214
		0.756971
		0.988454
		0.543606
		0.639393
		0.44727
		1.0278
		1.57515
		1.70324
		1.05915
		0.865503
		0.47801
		1.17084
		0.959223
		0.769128
		0.550954
		1.03246
		1.19238
		0.828014
		0.849887
		0.994456
		0.866983
		1.45556
		1.06983
		0.983154
		0.998181
		0.899057
		0.864254
		0.607916
		0.71307
		1.66318
		1.45626
		2.18647
		0.876885
		0.740364
		0.8908
		1.18148
		1.42003
		0.668361
		1.79096
		1.98281
		0.422459
		1.04591
		0.480465
		1.44388
[truncated: 1,244 more rows]

## Sheet: Figure 2-figure supplement 1E
DMSO	Tg	CCCP
0.83929	0.925602	0.839785
0.707946	0.899589	0.667469
0.834554	0.592087	0.847092
0.581339	0.722258	0.745811
0.503729	0.600587	0.789717
0.481983	0.356471	0.913536
0.278876	0.460534	0.725298
0.634065	0.704548	0.666412
0.581754	0.63681	0.481301
0.459638	0.619488	0.808303
0.927762	0.573346	0.716309
0.552718	0.565583	0.742767
0.871461	0.343683	0.713912
0.825966	0.830422	0.78195
0.829316	0.380862	0.503941
0.487772	0.858311	0.851473
0.326021	0.795386	0.745805
0.519954	0.70605	0.841013
0.715764	0.332735	0.703663
0.560155	0.549642	0.833978
0.705846	0.802962	0.660277
0.739371	0.343396	0.722421
0.451561	0.515988	0.69579
0.693757	0.417714	0.765088
0.23165	0.178788	0.839525
0.47932	0.495939	0.942878
0.846532	0.854864	0.970281
0.439382	0.483162	0.637571
0.611261	0.489444	0.512613
0.585457	0.482019	0.876346
0.346143	0.726388	0.732788
0.736226	0.79996	0.400271
0.816083	0.504551	0.875417
0.706568	0.82102	0.814537
0.914941	0.530391	0.576717
0.278342	0.821983	0.900302
0.629325	0.391574	0.494912
0.587631	0.448038	0.463315
0.60679	0.665198	0.677418
0.626595	0.561674	0.598503
0.886819	0.422383	0.449477
0.324518	0.37865	0.771513
0.244009	0.839023	0.848185
0.624834	0.8672	0.819046
0.628583	0.540129	0.720065
0.572001	0.141672	0.765974
0.79308	0.760144	0.649845
0.602304	0.720487	0.618369
0.691498	0.0946065	0.688627
0.674044	0.317298	0.845476
0.218977	0.167293	0.746709
0.607573	0.284665	0.780897
0.710413	0.728723	0.579137
0.80119	0.173616	0.700508
0.888709	0.435043	0.709643
0.578503	0.569281	0.630614
0.447826	0.190106	0.935254
0.790633	0.389822	0.725723
0.711726	0.604421	0.572232
0.916137	0.37356	0.807341
0.347149	0.642162	0.715546
0.799299	0.591215	0.71545
0.335257	0.815099	0.786783
0.500413	0.646481	0.688205
0.33422	0.616924	0.275981
0.919516	0.591541	0.403277
0.871933	0.521926	0.90851
0.781483	0.629295	0.785508
0.6526	0.35987	0.446868
0.306367	0.568379	0.844329
0.562412	0.571377	0.594544
0.758469	0.618222	0.280249
0.21629	0.66605	0.67344
0.556902	0.528473	0.565346
0.486138	0.652068	0.666091
0.515622	0.459166	0.624475
0.359075	0.458126	0.751141
0.672314	0.526208	0.738995
0.829642	0.13528	0.498997
0.303938	0.703912	0.714697
0.708156	0.30509	0.581711
0.763224	0.462365	0.888913
0.470035	0.4072	0.672863
0.300491	0.509162	0.660733
0.740507	0.797606	0.867631
0.385345	0.292213	0.41281
0.629671	0.712826	0.443852
0.251744	0.477281	0.900116
0.487633	0.664721	0.873187
0.354319	0.309298	0.466191
0.260186	0.689729	0.569314
0.455256	0.570356	0.787823
0.264877	0.514928	0.926301
0.715054	0.318377	0.907743
0.685296	0.59552	0.821282
0.616684	0.627966	0.745355
0.696632	0.628696	0.820147
0.327936	0.715253	0.641617
0.751094	0.786103	0.811892
0.747959	0.145621	0.843209
0.65468	0.714265	0.685941
0.679844	0.196611	0.753107
0.451989	0.472457	0.451265
0.489937	0.738323	0.736322
0.66623	0.227499	0.765226
0.901843	0.626874	0.502861
0.639763	0.567424	0.799136
0.6446	0.767177	0.803126
0.505252	0.773446	0.581235
0.697353	0.565365	0.781882
0.819419	0.540789	0.441277
0.456055	0.726706	0.740559
0.645732	0.18681	0.320669
0.501263	0.629701	0.899165
0.601088	0.515725	0.726079
0.675588	0.42571	0.719492
0.787253	0.40134	0.677187
0.533466	0.186995	0.346352
0.215416	0.730288	0.648289
0.47599	0.114678	0.939675
0.239737	0.690851	0.90728
0.190693	0.529117	0.435421
0.534451	0.430112	0.561582
0.526198	0.642585	0.760542
0.533548	0.460946	0.744341
0.223491	0.264669	0.733137
0.505686	0.621212	0.728389
0.399286	0.582535	0.833397
0.716229	0.559286	0.833909
0.590387	0.533633	0.567238
0.437752	0.563305	0.844444
0.561189	0.740745	0.855632
0.544856	0.323654	0.737328
0.406873	0.762587	0.893453
0.62758	0.72348	0.906267
0.622666	0.664726	0.537711
0.667796	0.273266	0.639364
0.693352	0.473806	0.850798
0.409169	0.21592	0.868474
0.673132	0.665324	0.583765
0.195243	0.131056	0.899841
0.729252	0.128372	0.735518
0.650695	0.281243	0.815827
0.340725	0.596464	0.819144
0.609639	0.672932	0.521607
0.798134	0.515551	0.776079
0.327356	0.680179	0.656891
0.855643	0.771912	0.79957
0.738512	0.590192	0.702944
0.737359	0.469197	0.793954
0.626176	0.481766	0.740598
0.742311	0.443345	0.701099
0.550023	0.507033	0.771054
0.205583	0.235797	0.605313
0.859186	0.427468	0.911187
0.775067	0.670216	0.660674
0.566249	0.791824	0.642194
0.596135	0.635574	0.440025
0.276611	0.364128	0.878963
0.735714	0.534802	0.855942
0.373824	0.355105	0.683263
0.428046	0.314331	0.922814
0.535674	0.299895	0.431203
0.7521	0.191408	0.566237
0.594456	0.576281	0.76285
0.706672	0.396564	0.478206
0.755532	0.625372	0.64361
0.725946	0.452377	0.435495
0.738831	0.359555	0.606448
0.743179	0.557605	0.837753
0.392582	0.735369	0.65772
0.742206	0.576167	0.565819
0.648884	0.461468	0.493416
0.65328	0.506533	0.4979
0.860917	0.244728	0.555848
0.726357	0.647198	0.873221
0.633024	0.494052	0.514905
0.716461	0.475648	0.640846
0.281377	0.349939	0.612263
0.611239	0.503572	0.884077
0.769635	0.45305	0.592212
0.642334	0.231878	0.866514
0.590307	0.570612	0.936498
0.613144	0.665417	0.756727
0.388863	0.24557	0.739496
0.710593	0.417985	0.565322
0.285875	0.71214	0.888107
0.617082	0.618451	0.814298
0.607754	0.333132	0.75653
0.577917	0.529263	0.805482
0.752296	0.661701	0.895341
0.641737	0.301875	0.812195
0.348317	0.648186	0.849199
0.661938	0.622774	0.838093
0.80027	0.45927	0.649951
0.599215	0.76263	0.805758
0.250479	0.212547	0.584864
0.844492	0.690337	0.940101
0.508831	0.608392	0.63919
0.593242	0.534009	0.695655
0.521232	0.327722	0.733103
0.212561	0.773723	0.410871
0.334585	0.728036	0.634056
0.419525	0.628399	0.549085
0.623115	0.47921	0.862774
0.240928	0.692331	0.491755
0.780264	0.660844	0.782834
0.538227	0.318122	0.815616
0.433635	0.694165	0.62454
0.344719	0.818672	0.637455
0.455539	0.570193	0.601308
0.365113	0.385798	0.692219
0.571256	0.73183	0.831258
0.610725	0.905547	0.469898
0.632559	0.433223	0.851382
0.507639	0.710088	0.631869
0.777466	0.718418	0.773736
0.547909	0.60031	0.804486
0.778859	0.53351	0.610505
0.737272	0.526229	0.740504
0.648549	0.768831	0.704018
0.164014	0.537041	0.404981
0.373763	0.584309	0.603394
0.42084	0.485758	0.670286
0.451659	0.285024	0.903494
0.400592	0.485694	0.652182
0.239004	0.508143	0.65229
0.575577	0.629323	0.530172
0.25854	0.694598	0.381514
0.656737	0.212406	0.850773
0.303272	0.432135	0.697731
0.567196	0.488999	0.688197
0.681378	0.581016	0.648917
0.569422	0.358474	0.759548
0.797067	0.258332	0.688036
0.368052	0.604035	0.756615
0.518731	0.647347	0.752019
0.530064	0.690317	0.658249
0.304633	0.643186	0.785826
0.586299	0.727985	0.750552
0.442715	0.809469	0.477892
0.844209	0.254622	0.536735
0.370212	0.600365	0.839776
0.660101	0.562877	0.822158
0.372208	0.579862	0.817573
0.650508	0.134912	0.663957
0.462279	0.332496	0.667172
0.402555	0.473465	0.886305
0.494179	0.61243	0.597512
0.824914	0.526832	0.792375
0.386979	0.495013	0.57234
0.389926	0.512211	0.865039
0.723037	0.712733	0.820635
0.699254	0.638515	0.870946
0.410903	0.332073	0.583712
0.334795	0.377428	0.516566
0.69168	0.586694	0.701199
0.677867	0.517435	0.639507
0.656567	0.172755	0.708526
0.782407	0.763166	0.865474
0.724932	0.7737	0.709072
0.73691	0.7762	0.899466
0.605415	0.842212	0.827539
0.543738	0.763984	0.786562
0.69989	0.196361	0.766894
0.716986	0.451891	0.906952
0.675915	0.515858	0.570155
0.597906	0.521149	0.900625
0.551497	0.793041	0.782291
0.807963	0.53788	0.843905
0.550009	0.454456	0.903381
0.708682	0.406377	0.877681
0.644566	0.633549	0.629808
0.594745	0.577643	0.752824
0.491356	0.462652	0.697243
0.507619	0.856306	0.698215
0.442069	0.513795	0.495906
0.476616	0.523908	0.496584
0.558476	0.203692	0.346698
0.60529	0.751374	0.482441
0.522443	0.206044	0.624722
0.305513	0.342575	0.524456
0.706326	0.661474	0.701045
0.21136	0.675977	0.520927
0.590431	0.628139	0.578796
0.327147	0.679758	0.865591
0.814244	0.663568	0.842014
0.613373	0.452059	0.686137
0.740142	0.624831	0.712265
0.459664	0.455876	0.694668
0.631304	0.463239	0.860887
0.918792	0.524969	0.872303
0.639023	0.527547	0.489457
0.628212	0.57448	0.752047
0.391929	0.539235	0.578229
0.491071	0.76661	0.713135
0.795747	0.735597	0.754997
0.687742	0.170698	0.759335
0.18791	0.319817	0.838083
0.55049	0.528632	0.842506
0.281125	0.380961	0.61396
0.585329	0.581553	0.813775
0.353878	0.344381	0.486039
0.860412	0.62748	0.898193
0.400122	0.0922005	0.471379
0.945079	0.208062	0.882966
0.579095	0.315444	0.653111
0.402791	0.283305	0.722753
0.352661	0.506438	0.894338
0.724772	0.192326	0.605361
0.372238	0.5588	0.833822
0.807339	0.595031	0.604454
0.566831	0.488259	0.691427
0.241144	0.265878	0.906624
0.671754	0.194892	0.897847
0.779251	0.606231	0.763412
0.710167	0.654434	0.618603
0.573524	0.528968	0.538488
0.492335	0.252855	0.751261
0.271599	0.528829	0.364099
0.213229	0.522088	0.750992
0.513064	0.217096	0.755009
0.45936	0.268122	0.761854
0.563997	0.748667	0.551923
0.7427	0.32899	0.927146
0.661975	0.520422	0.725667
0.709082	0.237913	0.523545
0.752116	0.870102	0.730243
0.657706	0.329669	0.946119
0.577206	0.609879	0.91103
0.327372	0.298773	0.703031
0.205376	0.642772	0.295708
0.752299	0.634563	0.931067
0.502019	0.52395	0.842574
0.641458	0.464777	0.820802
0.829985	0.731401	0.593162
0.725112	0.188603	0.629591
0.59028	0.198934	0.71861
0.46415	0.197897	0.851042
0.690651	0.416338	0.593165
0.576001	0.271286	0.842413
0.80999	0.483316	0.883995
0.737855	0.55521	0.390947
0.705092	0.657442	0.78816
0.808251	0.426287	0.923279
0.44705	0.246687	0.669629
0.67443	0.50179	0.244275
0.516102	0.356887	0.881557
0.582135	0.405126	0.631635
0.505642	0.624495	0.580863
0.403212	0.627108	0.867654
0.213259	0.187434	0.441012
0.237722	0.278141	0.705177
0.251762	0.59617	0.492601
0.166711	0.439855	0.624971
0.520354	0.528471	0.879064
0.699932	0.389265	0.366048
0.691735	0.272061	0.830381
0.550125	0.488834	0.721646
0.59642	0.49718	0.58026
0.366094	0.402059	0.882235
0.600566	0.461205	0.857179
0.758272	0.548446	0.315332
0.254369	0.402604	0.859763
0.888089	0.200959	0.714028
0.637242	0.484172	0.934212
0.54695	0.531778	0.853697
0.215902	0.301981	0.730334
0.639374	0.58315	0.665004
0.544164	0.396308	0.606735
0.727294	0.528097	0.56108
0.813365	0.321824	0.788081
0.618373	0.165392	0.826001
0.7271	0.424501	0.745611
0.275399	0.149903	0.905735
0.564595	0.28054	0.829571
0.506672	0.589924	0.891179
0.488709	0.527253	0.774165
0.457707	0.510432	0.429362
0.855407	0.568936	0.930082
0.62701	0.532889	0.906804
0.865402	0.498653	0.896634
0.768447	0.786897	0.824499
0.737847	0.483993	0.626018
0.303263	0.32605	0.843755
0.296232	0.196809	0.925574
0.64972	0.116842	0.944845
0.581766	0.438584	0.781499
0.768984	0.247407	0.858785
0.644839	0.600191	0.684269
0.756064	0.686729	0.845361
0.74739	0.149626	0.876457
0.562624	0.39968	0.927243
0.407203	0.538056	0.562009
0.659667	0.501104	0.747151
0.855498	0.49981	0.770827
0.436818	0.298104	0.720699
0.699537	0.399973	0.852382
0.666171	0.208748	0.957017
0.877903	0.595317	0.545918
0.694456	0.414139	0.594234
0.90854	0.209066	0.899905
0.523387	0.301472	0.601818
0.314504	0.472911	0.916592
0.586152	0.263482	0.906262
0.451154	0.7062	0.833937
0.658764	0.686395	0.840934
0.524682	0.658024	0.723814
0.3408	0.374907	0.718539
0.223722	0.415488	0.861513
0.445068	0.532071	0.520079
0.510505	0.755063	0.781735
0.715006	0.657267	0.905273
0.717452	0.319663	0.649411
0.28478	0.445326	0.812777
0.578919	0.311636	0.895615
0.409665	0.466358	0.676746
0.851687	0.767855	0.938699
0.857822	0.461758	0.673935
0.776503	0.678072	0.817335
0.367662	0.570853	0.716881
0.876498	0.308537	0.688982
0.169699	0.543989	0.655221
0.534479	0.169803	0.23121
0.656552	0.558447	0.398618
0.506598	0.527685	0.716464
0.385733	0.424113	0.718002
0.574461	0.648607	0.91857
0.435425	0.620471	0.896394
0.677515	0.555945	0.828203
0.62825	0.234794	0.834204
0.582017	0.649963	0.761629
0.790566	0.121828	0.881233
0.628103	0.63893	0.736346
0.509084	0.173404	0.849318
0.63694	0.611215	0.737654
0.587706	0.451189	0.742686
0.503249	0.330019	0.84566
0.712547	0.85574	0.877932
0.644304	0.195968	0.777593
0.81036	0.305292	0.695806
0.452114	0.519241	0.636287
0.169453	0.638424	0.849587
0.647864	0.188237	0.916799
0.863103	0.542365	0.706623
0.413474	0.273503	0.635985
0.495144	0.254544	0.706788
0.835774	0.632401	0.6723
0.207884	0.767105	0.301897
0.755527	0.233433	0.666736
0.854361	0.371904	0.734581
0.583565	0.174391	0.314163
0.56557	0.433716	0.556442
0.816831	0.472898	0.897427
0.77386	0.410148	0.855026
0.91843	0.601151	0.769646
0.802307	0.674486	0.866243
0.720009	0.442429	0.434854
0.868754	0.671294	0.810402
0.679522	0.205517	0.848136
0.359589	0.395003	0.7409
0.681615	0.641664	0.637438
0.248529	0.454623	0.722327
0.720523	0.455601	0.386301
0.524735	0.673284	0.702201
0.520155	0.736524	0.585902
0.558228	0.603907	0.865349
0.614213	0.423683	0.586703
0.357388	0.344448	0.598821
0.198753	0.72488	0.637057
0.515485	0.607926	0.503084
0.229403	0.275408	0.787999
0.704171	0.52196	0.718586
0.733487	0.400323	0.753217
0.803486	0.354563	0.69727
0.475713	0.180712	0.658764
0.412908	0.294446	0.631428
0.602733	0.342707	0.719061
0.546328	0.546689	0.813111
0.393153	0.617677	0.848343
0.603293	0.181897	0.875152
0.463987	0.451005	0.630761
0.575665	0.568995	0.67263
0.555567	0.606045	0.490983
0.267671	0.410003	0.824369
0.749423	0.752183	0.729179
0.332875	0.210501	0.82231
0.588359	0.461222	0.809476
0.75853	0.659252	0.747644
0.625027	0.641031	0.85246
0.456136	0.474493	0.677026
0.550386	0.242196	0.857042
0.631897	0.483401	0.419077
0.806311	0.830004	0.830891
0.4929	0.590042	0.690927
0.335433	0.142137	0.598135
0.41685	0.648072	0.769616
0.711667	0.588922	0.845573
0.544231	0.707913	0.815887
0.412424	0.61774	0.754676
0.399778	0.513655	0.38575
0.615199	0.570874	0.551119
0.573045	0.500231	0.866449
0.43773	0.539124	0.722864
0.261729	0.571944	0.874018
0.641029	0.424226	0.758137
0.727422	0.41252	0.703918
0.660091	0.577675	0.445252
0.600184	0.625226	0.566025
0.831756	0.717227	0.90204
0.576405	0.440747	0.910908
0.589931	0.716343	0.511566
0.396265	0.580378	0.571147
0.564421	0.64884	0.632299
0.952914	0.655398	0.925592
0.415346	0.62849	0.890402
0.78355	0.650963	0.788546
0.805916	0.571958	0.774181
0.53474	0.466562	0.880255
0.646548	0.201009	0.566781
0.529379	0.19587	0.605245
0.338077	0.131327	0.712403
0.568451	0.462608	0.902748
0.680038	0.223102	0.446818
0.550425	0.646897	0.436127
0.374503	0.266829	0.676328
0.577464	0.685062	0.83584
0.516267	0.121263	0.735747
0.388205	0.444086	0.531322
0.406584	0.256215	0.692876
0.483095	0.21085	0.439838
0.821151	0.522557	0.736594
0.271637	0.76688	0.881689
0.754396	0.204219	0.6741
0.241354	0.684414	0.779995
0.796392	0.318448	0.899896
0.31466	0.525079	0.849493
0.653363	0.379326	0.687508
0.412828	0.132362	0.723997
0.237501	0.372118	0.463186
0.746252	0.504732	0.857628
0.559675	0.628448	0.931716
0.474085	0.57632	0.811192
0.762197	0.315602	0.620006
0.368613	0.617632	0.629492
0.630045	0.249709	0.647443
0.803926	0.545413	0.846516
0.361226	0.641388	0.709672
0.837576	0.536198	0.648384
0.40928	0.673854	0.626245
0.630542	0.564914	0.356037
0.754787	0.584217	0.573568
0.405189	0.484053	0.744003
0.510174	0.268506	0.742034
0.81026	0.67027	0.85204
0.338735	0.364149	0.698817
0.77846	0.582014	0.422075
0.463544	0.36303	0.918728
0.681016	0.155032	0.590701
0.433599	0.525118	0.549119
0.409152	0.377218	0.707826
0.918048	0.625008	0.393006
0.832727	0.240993	0.822997
0.235811	0.194517	0.847741
0.62445	0.431693	0.802167
0.686895	0.406333	0.777878
0.253803	0.534227	0.607777
0.761122	0.429231	0.522596
0.909435	0.170052	0.694025
0.319226	0.640392	0.589484
0.827476	0.344738	0.706175
0.286326	0.383918	0.90138
0.744199	0.71189	0.730789
0.633866	0.496435	0.405321
0.577768	0.346735	0.896624
0.607671	0.418738	0.449516
0.387107	0.315482	0.877623
0.744678	0.460495	0.868234
0.845074	0.495623	0.581266
0.716799	0.320075	0.891377
0.304372	0.446585	0.65874
0.735398	0.507102	0.706689
0.210954	0.347619	0.593291
0.385782	0.194191	0.710415
0.4551	0.337807	0.868352
0.662153	0.469553	0.791447
0.353011	0.649207	0.8456
0.50685	0.608459	0.572688
0.238439	0.185623	0.853252
0.652189	0.128464	0.658456
0.495469	0.744883	0.754501
0.463584	0.473455	0.481606
0.338405	0.609568	0.590251
0.464468	0.16961	0.373261
0.202618	0.37141	0.884745
0.452865	0.126738	0.522658
0.436127	0.470476	0.321435
0.161591	0.583515	0.599824
0.581208	0.570139	0.86281
0.577775	0.16449	0.799432
0.233339	0.246909	0.905365
0.583619	0.641743	0.691539
0.472836	0.475113	0.49648
0.825422	0.507247	0.547493
0.393763	0.687338	0.620726
0.730114	0.13232	0.567006
0.471181	0.21646	0.559312
0.481278	0.332912	0.714471
0.268191	0.211921	0.417331
0.469969	0.132937	0.561592
0.733851	0.418159	0.670668
0.505813	0.746433	0.811381
0.685893	0.335	0.697453
0.35576	0.641908	0.931969
0.628842	0.216814	0.657059
0.517391	0.235377	0.796019
0.488757	0.493993	0.559024
0.585918	0.223728	0.668212
0.81598	0.576554	0.437171
0.725225	0.572637	0.501892
0.904509	0.447327	0.759022
0.769022	0.496864	0.626698
0.751624	0.661189	0.641473
0.709346	0.257675	0.529552
0.832104	0.484416	0.667012
0.384036	0.323954	0.884353
0.592535	0.437556	0.732755
0.819109	0.540315	0.93953
0.785932	0.415048	0.777947
0.486633	0.320786	0.817463
0.577325	0.677792	0.805908
0.643418	0.745444	0.630666
0.672091	0.655947	0.397033
0.661743	0.360849	0.666182
0.712914	0.514089	0.881963
0.705095	0.538049	0.721922
0.599335	0.380572	0.68532
0.435588	0.500126	0.762483
0.658084	0.439065	0.468471
0.632834	0.654957	0.701161
0.663652	0.636341	0.691239
0.588039	0.634842	0.658871
0.681374	0.647591	0.716365
0.398226	0.110694	0.43268
0.322099	0.576709	0.603621
0.890137	0.612977	0.819492
0.347752	0.484838	0.674892
0.699324	0.545454	0.369206
0.161544	0.559012	0.597898
0.521429	0.196305	0.804658
0.240069	0.405715	0.843368
0.771622	0.470458	0.617658
0.701631	0.632324	0.655468
0.595903	0.430851	0.565771
0.775605	0.152216	0.60246
0.635238	0.596611	0.567752
0.450125	0.522473	0.673
0.870137	0.197925	0.757425
0.653789	0.462073	0.682112
0.699513	0.193798	0.92742
0.406097	0.462281	0.537081
0.847514	0.540041	0.681594
0.636252	0.120423	0.384505
0.646374	0.353221	0.829868
0.927894	0.424753	0.690609
0.578653	0.574299	0.604172
0.504777	0.733172	0.735622
0.7447	0.144461	0.49018
0.385702	0.116849	0.401637
0.6783	0.239473	0.609841
0.915871	0.61387	0.512289
0.461759	0.362016	0.834198
0.85042	0.332614	0.927151
0.652887	0.607166	0.506403
0.624173	0.89706	0.693424
0.807557	0.397671	0.369084
0.70812	0.606708	0.743005
0.375836	0.707962	0.841612
0.900629	0.315621	0.729311
0.73101	0.455697	0.802051
0.564487	0.508356	0.680384
0.648164	0.578277	0.870216
0.496848	0.357458	0.916478
0.840703	0.696681	0.791494
0.802433	0.389888	0.5936
0.743787	0.593457	0.686796
0.801117	0.520977	0.755902
0.656586	0.612293	0.866455
0.27782	0.608363	0.633578
0.770073	0.300241	0.880648
0.860027	0.704398	0.817982
0.428465	0.441643	0.742121
0.658976	0.516028	0.484741
0.580199	0.367458	0.852523
0.485597	0.44167	0.54715
0.810029	0.377835	0.849133
0.838532	0.498635	0.565764
0.79263	0.193825	0.802192
0.363587	0.329843	0.93692
0.624322	0.501658	0.50733
0.943094	0.390271	0.42418
0.559679	0.622693	0.652631
0.904108	0.688167	0.690341
0.522308	0.826991	0.7718
0.266899	0.501277	0.420923
0.680204	0.518286	0.734445
0.748109	0.196285	0.716889
0.587759	0.49094	0.865866
0.288858	0.297369	0.542921
0.583805	0.5935	0.835118
0.729756	0.43733	0.678201
0.837982	0.654938	0.623051
0.662937	0.618031	0.7137
0.520949	0.200023	0.672668
0.512402	0.234552	0.640187
0.573078	0.649116	0.851319
0.664912	0.672514	0.770911
0.244883	0.754789	0.742222
0.638	0.158989	0.57765
0.609707	0.40155	0.628665
0.707082	0.712418	0.859886
0.776194	0.186429	0.584879
0.507711	0.598082	0.958351
0.36188	0.567985	0.713953
0.856005	0.592025	0.757645
0.616786	0.534598	0.631734
0.795398	0.651911	0.435991
0.541593	0.542914	0.752311
0.856914	0.447541	0.690585
0.284425	0.646671	0.834651
0.823339	0.625039	0.660893
0.713706	0.533136	0.690983
0.55989	0.153749	0.467775
0.921926	0.153123	0.812526
0.510836	0.491624	0.94686
0.225724	0.597959	0.664981
0.23196	0.298914	0.77849
0.437395	0.47567	0.626872
0.677805	0.487666	0.870363
0.798863	0.536174	0.839144
0.788432	0.464145	0.460817
0.267098	0.545398	0.844157
0.506039	0.222836	0.823288
0.523825	0.338648	0.65398
0.749472	0.263025	0.555304
0.721887	0.382269	0.760663
0.702519	0.133209	0.883887
0.325901	0.179589	0.718071
0.384702	0.436833	0.700855
0.713128	0.112837	0.836801
0.757946		0.939029
0.595143		0.735222
0.746304		0.856473
0.794298		0.381858
0.513159		0.663425
0.615539		0.905835
0.398407		0.789466
0.732091		0.946
0.640773		0.815381
0.571821		0.523606
0.589578		0.881124
0.837451		0.587845
0.755484		0.879214
0.567684		0.645355
0.568832		0.777704
0.704923		0.395798
0.661064		0.787538
0.285999		0.567232
0.732285		0.88069
0.496751		0.657942
0.708707		0.285288
0.39484		0.840956
0.712794		0.857765
0.221758		0.719607
0.215307		0.714357
0.655135		0.73773
0.59842		0.778868
0.699211		0.89564
0.470102		0.836992
0.38457		0.472641
0.366019		0.738027
0.323403		0.660348
0.622058		0.329325
0.507622		0.742597
0.289352		0.87381
0.904581		0.853822
0.340183		0.758284
0.431916		0.7217
0.459713		0.745815
0.251226		0.708622
0.273181		0.33818
0.73721		0.555039
0.614201		0.888986
0.473855		0.460732
0.408286		0.884448
0.548441		0.908433
0.312537		0.649142
0.455908		0.561593
0.817124		0.83777
0.578552		0.678026
0.407528		0.892264
0.303294		0.833966
0.906602		0.553889
0.484971		0.933612
0.650216		0.810771
0.84975		0.820733
0.87949		0.827894
0.434107		0.411399
0.729421		0.802272
0.210428		0.7146
0.708264		0.864477
0.515711		0.861118
0.439727		0.898406
0.513259		0.719687
0.731147		0.898358
0.853567		0.843192
0.816055		0.842694
0.21763		0.860018
0.643831		0.851962
0.431376		0.581676
0.716852		0.822978
0.595642		0.827752
0.254838		0.789036
0.710491		0.843547
0.745286		0.654536
0.403647		0.738582
0.801531		0.524244
0.61811		0.732167
0.272449		0.865545
0.795309		0.59981
0.702066		0.672055
0.406864		0.501051
0.656649		0.862314
0.487337		0.807472
0.224445		0.844662
0.879194		0.689109
0.861822		0.723271
0.252147		0.622884
0.735432		0.627482
0.793963		0.478519
0.77901		0.773216
0.762648		0.723345
0.88626		0.496632
0.740735		0.720823
0.244679		0.844734
0.664256		0.686228
0.532855		0.829599
0.816186		0.617363
0.759364		0.758385
0.811147		0.490347
0.654128		0.668803
0.753633		0.509611
0.706844		0.872111
0.746526		0.492061
0.299589		0.854158
0.52289		0.727535
0.709772		0.435295
0.57714		0.747177
0.932383		0.80374
0.415431		0.66494
0.612862		0.695877
0.768394		0.65247
0.261439		0.714264
0.569819		0.690173
0.726572		0.787049
0.851627		0.733506
0.724196		0.820202
0.735965		0.753953
0.482348		0.72352
0.20939		0.777337
0.360308		0.593895
0.687155		0.505555
0.698023		0.562321
0.724083		0.837759
0.841751		0.858387
0.598714		0.843117
0.662299		0.598456
0.809023		0.74583
0.549142		0.749238
0.28347		0.737776
0.61941		0.577516
0.621483		0.80811
0.502519		0.361252
0.557731		0.91767
0.790385		0.686783
0.704619		0.710698
0.791974		0.758975
0.396827		0.829392
0.747367		0.751054
0.811777		0.640478
0.859004		0.901049
0.431822		0.796713
0.426838		0.906153
0.712824		0.713971
0.768528		0.888209
0.49395		0.424348
0.397503		0.518684
0.761642		0.813642
0.574881		0.760564
0.791798		0.775264
0.65889		0.661091
0.580994		0.350202
0.687206		0.705512
0.418		0.865001
0.318696		0.836873
0.806567		0.687284
0.480156		0.470139
0.844278		0.891509
0.465203		0.890617
0.749205		0.559039
0.794027		0.443893
0.553268		0.826356
0.500171		0.778631
0.484672		0.691809
0.621223		0.676503
0.798066		0.725259
0.889859		0.860229
0.326982		0.8954
0.783435		0.865417
0.289387		0.789972
0.662796		0.679896
0.745439		0.432382
0.257883		0.408827
0.223269		0.683101
0.50884		0.855031
0.429828		0.713689
0.347035		0.544186
0.695172		0.870596
0.28723		0.778407
0.396592		0.663769
0.797094		0.595738
0.449608		0.821892
0.457913		0.614868
0.572446		0.737447
0.363208		0.422861
0.566521		0.372633
0.170843		0.686377
0.646443		0.69941
0.806692		0.811419
0.847591		0.769078
0.275248		0.824139
0.283632		0.736902
0.565028		0.850953
0.567287		0.936101
0.862352		0.776006
0.475424		0.691806
0.433804		0.373012
0.197517		0.89721
0.421432		0.724066
0.60384		0.744316
0.691535		0.855299
0.627221		0.881547
0.207127		0.822944
0.470225		0.915757
0.829205		0.734229
0.640744		0.662567
0.776395		0.580486
0.27383		0.481094
0.396969		0.937715
0.608424		0.628017
0.45432		0.742183
0.40811		0.780743
0.351759		0.480216
0.942371		0.524118
0.417425		0.427768
0.160316		0.762333
0.767886		0.844112
0.721531		0.714885
0.552077		0.765582
0.314257		0.696326
0.517762		0.800773
0.826972		0.729089
0.411874		0.546178
0.353669		0.736483
0.894849		0.841846
0.198189		0.517185
0.361085		0.776178
0.711996		0.893139
0.709721		0.688372
0.527737		0.916426
0.712703		0.711758
0.771431		0.852611
0.626788		0.903994
0.626416		0.642979
0.629407		0.742323
0.558536		0.835061
0.506788		0.777484
0.546112		0.819847
0.240156		0.791104
0.619588		0.569188
0.717479		0.681368
0.46351		0.699361
0.744458		0.771971
0.440477		0.887384
0.632864		0.898234
0.910297		0.870761
0.82989		0.763372
0.417969		0.848585
0.758594		0.847966
0.504941		0.382684
0.783595		0.828505
0.318929		0.494079
0.57109		0.834914
0.721935		0.723539
0.65397		0.671851
0.666399		0.807871
0.389962		0.815561
0.69731		0.889415
0.432724		0.58206
0.809073		0.917358
0.357394		0.72091
0.89539		0.655479
0.310154		0.761017
0.82407		0.427127
0.488681		0.823743
0.771125		0.768009
0.706458		0.659003
0.295112		0.711423
0.684764		0.835835
0.281479		0.843824
0.805124		0.75051
0.895878		0.888821
0.9086		0.587745
0.396471		0.541747
0.921502		0.756012
0.561211		0.749615
0.788944		0.576458
0.830178		0.576968
0.704922		0.783451
0.671334		0.407477
0.881226		0.730143
0.572126		0.891737
0.557378		0.77939
0.786233		0.809373
0.179049		0.658986
0.197176		0.898047
0.844176		0.814465
0.464476		0.802464
0.244128		0.645794
0.273456		0.546481
0.712756		0.656295
0.515627		0.762036
0.854801		0.520867
0.635241		0.560312
0.659758		0.780294
0.272572		0.520603
0.203705		0.616572
0.341362		0.759754
0.728045		0.719844
0.74072		0.54914
0.874466		0.498647
0.264621		0.58614
0.748058		0.838947
0.364506		0.827795
0.733755		0.881849
0.335248		0.77232
0.308888		0.522069
0.456795		0.560486
0.487674		0.812601
0.424911		0.877949
0.641875		0.633494
0.894089		0.872857
0.589991		0.659887
0.843494		0.90303
0.652651		0.893756
0.601857		0.601131
0.884498		0.675498
0.508024		0.657354
0.642301		0.893683
0.255614		0.695224
0.30622		0.837329
0.296397		0.695471
0.230108		0.790529
0.32451		0.693752
0.551752		0.688596
0.696667		0.825242
0.673859		0.755222
0.653087		0.903751
0.644374		0.619707
0.873051		0.879381
0.611923		0.593486
0.656808		0.791528
0.562609		0.784941
0.233526		0.892415
0.636717		0.881522
0.651979		0.328464
0.78422		0.68892
0.825374		0.918521
0.876222		0.740118
0.850041		0.818638
0.706304		0.826072
0.569613		0.834243
0.527857		0.770167
0.29725		0.791029
0.540154		0.763619
0.394524		0.80475
0.779768		0.74796
0.645243		0.737255
0.627442		0.814778
0.223787		0.598664
0.50408		0.837717
0.66516		0.901776
0.531123		0.682817
0.614451		0.573767
0.753623		0.53882
0.50649		0.734303
0.551816		0.484474
0.489321		0.875167
0.574551		0.4929
0.554715		0.747937
0.590004		0.787523
0.182988		0.700831
0.249221		0.689501
0.225846		0.806535
0.565129		0.716055
0.442209		0.546832
0.807825		0.665016
0.729599		0.862258
0.762178		0.908571
0.461342		0.753509
0.712398		0.838593
0.371818		0.949066
0.397985		0.834112
0.514498		0.699532
0.138787		0.799533
0.457332		0.775654
0.414899		0.424243
0.345582		0.89827
0.168959		0.42303
0.433714		0.905777
0.680119		0.654211
0.685533		0.449541
0.817913		0.92753
0.55803		0.628244
0.803339		0.610287
0.511469		0.848248
0.598932		0.881148
0.958345		0.648616
0.193841		0.611334
0.903818		0.620056
0.474436		0.659222
0.308888		0.705932
0.293477		0.782439
0.810509		0.81397
0.437337		0.822056
0.903675		0.369839
0.805788		0.815466
0.564085		0.887764
0.689224		0.364582
0.688751		0.931705
0.889931		0.861184
0.286079		0.703551
0.784144		0.603466
0.465224		0.860713
0.765845		0.539775
0.433022		0.744219
0.239153		0.782842
0.482448		0.919422
0.311078		0.919581
0.512846		0.287026
0.569767		0.594488
0.458317		0.414235
0.636553		0.706036
0.38282		0.781637
0.694103		0.905912
0.347312		0.746885
0.577987		0.306914
0.575209		0.592984
0.797532		0.308485
0.311792		0.822948
0.565567		0.725772
0.236208		0.559255
0.818513		0.925161
0.665886		0.643056
0.648068		0.352266
0.713326		0.517096
0.7283		0.83836
0.569871		0.674554
0.685481		0.775797
0.762046		0.444407
0.513753		0.786185
0.748426		0.435263
0.678694		0.625257
0.875249		0.843638
0.59261		0.73444
0.715205		0.416596
0.669421		0.836053
0.724394		0.647486
0.72429		0.72249
0.421355		0.943064
0.699539		0.836519
0.6267		0.856633
0.714114		0.865243
0.76873		0.834792
0.751471		0.826829
0.203498		0.658169
0.225812		0.873256
0.749122		0.947228
0.918225		0.789492
0.533732		0.715348
0.937389		0.789698
0.589551		0.730694
0.243174		0.647293
0.492017		0.635277
0.739692		0.85985
0.792121		0.822289
0.451848		0.369934
0.742223		0.781727
0.889623		0.707657
0.592773		0.461279
0.234272		0.743375
0.25263		0.725975
0.583349		0.538557
0.413565		0.653432
0.88404		0.832444
0.452321		0.398214
0.421362		0.71361
0.577806		0.688355
0.824064		0.720285
0.760826		0.708276
0.825103		0.713225
0.542385		0.603402
0.890894		0.577817
0.530449		0.81729
0.698954		0.943644
0.524025		0.548848
0.311384		0.899724
0.605781		0.931809
0.457085		0.865983
0.370383		0.45273
0.227909		0.848775
0.594413		0.574081
0.547785		0.674411
0.282175		0.848054
0.721728		0.837227
0.206026		0.772602
0.589159		0.941949
0.594226		0.503777
0.670851		0.756678
0.678966		0.594162
0.631119		0.901824
0.464749		0.781406
0.770429		0.407593
0.862083		0.757901
0.423361		0.717382
0.182248		0.875472
0.880512		0.903989
0.776604		0.6783
0.606656		0.848487
0.832509		0.765425
0.582869		0.845965
0.853686		0.87122
0.76661		0.658454
0.84669		0.871591
0.608895		0.784116
0.512368		0.894464
0.659131		0.524906
0.330689		0.779899
0.597056		0.777555
0.792396		0.676788
0.700573		0.822835
0.161627		0.943896
0.571278		0.677154
0.832364		0.718476
0.781871		0.774813
0.572738		0.746373
0.86801		0.751683
0.74243		0.846997
0.807925		0.952945
0.20728		0.491319
0.547623		0.908789
0.361862		0.577758
0.58492		0.614197
0.703799		0.765121
0.382987		0.591257
0.69979		0.522141
0.787221		0.841955
0.761949		0.950713
0.669422		0.806963
0.606229		0.785252
0.561913		0.735823
0.212718		0.89712
0.637263		0.690157
0.798		0.793245
0.488924		0.733953
0.421686		0.789365
0.628068		0.702556
0.765584		0.546059
0.661022		0.58791
0.615756		0.923404
0.581574		0.730493
0.405741		0.875178
0.678724		0.810346
0.832906		0.508631
0.62627		0.644471
0.757713		0.771376
0.712269		0.648179
0.808448		0.749575
0.569958		0.689738
0.83911		0.766884
0.892493		0.859889
0.2011		0.72118
0.282501		0.57453
0.499283		0.610705
0.415249		0.698036
0.562879		0.617298
0.469971		0.872877
0.632141		0.711831
0.726995		0.874786
0.687361		0.80813
0.773244		0.574273
0.264768		0.726078
0.417915		0.882944
0.3532		0.590517
0.582912		0.615395
0.197212		0.664353
0.224793		0.589266
0.386327		0.587602
0.522318		0.898329
0.272779		0.663976
0.508514		0.785381
0.296883		0.705084
0.501899		0.867828
0.624335		0.737488
0.534621		0.441853
0.500382		0.576577
0.861463		0.658413
0.656126		0.726599
0.505164		0.72717
0.408186		0.846755
0.564255		0.804729
0.728681		0.885538
0.7335		0.718081
0.506406		0.727241
0.511455		0.88232
0.250256		0.763471
0.322828		0.784415
0.81345		0.826973
0.218056		0.865776
0.765029		0.654472
0.548738		0.503212
0.492642		0.69645
0.659907		0.709545
0.588106		0.632885
0.36806		0.752753
0.552611		0.918821
0.661884		0.690154
0.361843		0.822296
0.604993		0.66921
0.70833		0.933334
0.537334		0.856948
0.283043		0.663753
0.865407		0.472895
0.238704		0.595576
0.750979		0.361748
0.736327		0.61751
0.45045		0.893114
0.794381		0.850703
0.457537		0.86025
0.61732		0.72981
0.594332		0.68371
0.639183		0.795239
0.748394		0.617975
0.512766		0.913378
0.625072		0.633231
0.480955		0.911426
0.570516		0.693215
0.691706		0.729738
0.431322		0.738787
0.648941		0.877478
0.712621		0.868061
0.67873		0.43155
0.821129		0.445526
0.811572		0.855599
0.843285		0.840254
0.677073		0.929204
0.475951		0.571
0.601902		0.819045
0.746588		0.89845
0.804532		0.824052
0.834668		0.713014
0.6735		0.84187
0.742355		0.607994
0.186491		0.424534
0.578257		0.691402
0.496492		0.624522
0.912407		0.682067
0.82663		0.916211
0.682812		0.609088
0.23681		0.574246
0.750688		0.83131
0.440892		0.705587
0.389405		0.83008
0.636721		0.72405
0.276877		0.593848
0.664627		0.632347
0.174863		0.752144
0.478552		0.810985
0.617578		0.708555
0.220445		0.674272
0.553245		0.555638
0.544562		0.759842
0.565088		0.568964
0.66733		0.803802
0.802441		0.652299
0.781479		0.909323
0.766947		0.631917
0.510015		0.55097
0.235771		0.770034
0.704788		0.534473
0.665118		0.638918
0.674957		0.678143
0.816533		0.695337
0.431254		0.444326
0.61411		0.621508
0.624975		0.693852
0.822769		0.797072
0.323528		0.857662
0.615133		0.80076
0.617139		0.56002
0.5655		0.929547
0.651038		0.521149
0.621323		0.823561
0.188374		0.483438
0.590158		0.65584
0.708172		0.709662
0.516479		0.746833
0.170348		0.886623
0.204094		0.865646
0.342819		0.84358
0.674218		0.872594
0.547946		0.549744
		0.39857
		0.612011
		0.736848
		0.684683
		0.780852
		0.622053
		0.629064
		0.781867
		0.658381
		0.761287
		0.6059
		0.909967
		0.743989
		0.73835
		0.769365
		0.915472
		0.94234
		0.726745
		0.947148
		0.852714
		0.795546
		0.877901
		0.858899
		0.754212
		0.781775
		0.887731
		0.80615
		0.907403
		0.764815
		0.875028
		0.652138
		0.675611
		0.647779
		0.721985
		0.287647
		0.918952
		0.76797
		0.911756
		0.851261
		0.808887
		0.678787
		0.783767
		0.465578
		0.799734
		0.900594
		0.802126
		0.947807
		0.89774
		0.945939
		0.78064
		0.883537
		0.681629
		0.68386
		0.783108
		0.908375
		0.753557
		0.819246
		0.871812
		0.876664
		0.618371
		0.941719
		0.723398
		0.544471
		0.682711
		0.788066
		0.839064
		0.624351
		0.811498
		0.708897
		0.762485
		0.627488
		0.790599
		0.691699
		0.699185
		0.74906
		0.848335
		0.798718
		0.691951
		0.510584
		0.800863
		0.722548
		0.433438
		0.818533
		0.811506
		0.663851
		0.75997
		0.932984
		0.773659
		0.814625
		0.784783
		0.576735
		0.796129
		0.598463
		0.699935
		0.649798
		0.802106
		0.532001
		0.797535
		0.598008
		0.774958
		0.575384
		0.595121
		0.818522
		0.770107
		0.565081
		0.729768
		0.758404
		0.466735
		0.90866
		0.79048
		0.802251
		0.647798
		0.891301
		0.867589
		0.735245
		0.449206
		0.630892
		0.64946
		0.7398
		0.790317
		0.909864
		0.504117
		0.618242
		0.901775
		0.683458
		0.570199
		0.845113
		0.825214
		0.842127
		0.502476
		0.789628
		0.560542
		0.8893
		0.66468
		0.937743
		0.954034
		0.937354
		0.857962
		0.821182
		0.813833
		0.737593
		0.79342
		0.733511
		0.896773
		0.83313
		0.717239
		0.572065
		0.624846
		0.897795
		0.660176
		0.624522
		0.834397
		0.667736
		0.731533
		0.866369
		0.921798
		0.535895
		0.696747
		0.786765
		0.851695
		0.756356
		0.832316
		0.680893
		0.772162
		0.58509
		0.838523
		0.688629
		0.894097
		0.941192
		0.87014
		0.5959
		0.770654
		0.635339
		0.751866
		0.60653
		0.754376
		0.499378
		0.802288
		0.804489
		0.816548
		0.66578
		0.626523
		0.899317
		0.651333
		0.963831
		0.898192
		0.772947
		0.784651
		0.848716
		0.641521
		0.696606
		0.711189
		0.638549
		0.870682
		0.81223
		0.923963
		0.617103
		0.463977
		0.409593
		0.908567
		0.791584
		0.851687
		0.746109
		0.859827
		0.860998
		0.762756
		0.875778
		0.591713
		0.537627
		0.483318
		0.654427
		0.422254
		0.913479
		0.466364
		0.928613
		0.727838
		0.829218
		0.66166
		0.746239
		0.862828
		0.63303
		0.69248
		0.713882
		0.767098
		0.622686
		0.528856
		0.561764
		0.563963
		0.719111
		0.705375
		0.86788
		0.74944
		0.532615
		0.861605
		0.825639
		0.571637
		0.808927
		0.889639
		0.801365
		0.664177
		0.67917
		0.876805
		0.443393
		0.639344
		0.86303
		0.473584
		0.402689
		0.614045
		0.567887
		0.822916
		0.67397
		0.676415
		0.882193
		0.71924
		0.603043
		0.854038
		0.784441
		0.535759
		0.882197
		0.649087
		0.695395
		0.679592
		0.805283
		0.783724
		0.719053
		0.542686
		0.53588
		0.805618
		0.933145
		0.816234
		0.650054
		0.794334
		0.826443
		0.685773
		0.822961
		0.701334
		0.614014
		0.595138
		0.878668
		0.528438
		0.751659
		0.864542
		0.761336
		0.464435
		0.700525
		0.801901
		0.907136
		0.817607
		0.681093
		0.640847
		0.843376
		0.927888
		0.739752
		0.671375
		0.657912
		0.384188
		0.46757
		0.761326
		0.858427
		0.603468
		0.612125
		0.677764
		0.860323
		0.818717
		0.543592
		0.851379
		0.417309
		0.912503
		0.850459
		0.74415
		0.801261
		0.860873
		0.473001
		0.867203
		0.696094
		0.747143
		0.83635
		0.889923
		0.715709
		0.752286
		0.82709
		0.912742
		0.722781
		0.743761
		0.883089
		0.714677
		0.904419
		0.903546
		0.60011
		0.644496
		0.625484
		0.840457
		0.755133
		0.634867
		0.928223
		0.834045
		0.625945
		0.942131
		0.765901
		0.57262
		0.504848
		0.613341
		0.86569
		0.602182
		0.928708
		0.763337
		0.558983
		0.642375
		0.725455
		0.380178
		0.940908
		0.753646
		0.750713
		0.527942
		0.635921
		0.813707
		0.86909
		0.638126
		0.585575
		0.871433
		0.605071
		0.874471
		0.544723
		0.792763
		0.5927
		0.793925
		0.542917
		0.845308
		0.529275
		0.817285
		0.541523
		0.708725
		0.879711
		0.635189
		0.794976
		0.903503
		0.485764
		0.527649
		0.754555
		0.812602
		0.536311
		0.658857
		0.471198
		0.861731
		0.902353
		0.576906
		0.683659
		0.856523
		0.766093
		0.658461
		0.900606
		0.677155
		0.796085
		0.610513
		0.66638
		0.862542
		0.630988
		0.427335
		0.875333
		0.703696
		0.805115
		0.520093
		0.806012
		0.844794
		0.894592
		0.72808
		0.840929
		0.598052
		0.692266
		0.758982
		0.769745
		0.62925
		0.765898
		0.472408
		0.810061
		0.738522
		0.646317
		0.904453
		0.692372
		0.804615
		0.886076
		0.728333
		0.767991
		0.866292
		0.870928
		0.764238
		0.769323
		0.718002
		0.83918
		0.567735
		0.670199
		0.972247
		0.717267
		0.677055
		0.844544
		0.811474
		0.801811
		0.520703
		0.432488
		0.82886
		0.707511
		0.585837
		0.768253
		0.807049
		0.898039
		0.803298
		0.668684
		0.5103
		0.29442
		0.812492
		0.475853
		0.785895
		0.872372
		0.620285
		0.653662
		0.727437
		0.636211
		0.690446
		0.639061
		0.84863
		0.636944
		0.871216
		0.885156
		0.645161
		0.824754
		0.45748
		0.580615
		0.928739
		0.804156
		0.833229
		0.887735
		0.801156
		0.580333
		0.878174
		0.653999
		0.907628
		0.718941
		0.547974
		0.716439
		0.645111
		0.788646
		0.850361
		0.627829
		0.427968
		0.617677
		0.836201
		0.845377
		0.75913
		0.859074
		0.887887
		0.837231
		0.862781
		0.716235
		0.845236
		0.686906
		0.899114
		0.797361
		0.850728
		0.828676
		0.817312
		0.633278
		0.823128
		0.783509
		0.835168
		0.89296
		0.846755
		0.705271
		0.94661
		0.915821
		0.866088
		0.565555
		0.66946
		0.657214
		0.633062
		0.822969
		0.883961
		0.612937
		0.822958
		0.777572
		0.84704
		0.570872
		0.781875
		0.858949
		0.854209
		0.795893
		0.772944
		0.536552
		0.874166
		0.620057
		0.789286
		0.889795
		0.775583
		0.667795
		0.731383
		0.507701
		0.755363
		0.872461
		0.697256
		0.866311
		0.848669
		0.629
		0.682513
		0.61059
		0.854495
		0.737574
		0.572528
		0.675554
		0.835059
		0.89854
		0.743576
		0.804839
		0.812481
		0.627566
		0.85806
		0.702267
		0.578403
		0.859913
		0.680334
		0.775218
		0.601992
		0.774575
		0.786218
		0.760086
		0.538217
		0.860957
		0.746426
		0.716162
[truncated: 1,437 more rows]
