# Supplementary material for: Pharmacologic activation of integrated stress response kinases inhibits pathologic mitochondrial fragmentation
Source: eLife. 2025 Feb 12;13:RP100541. doi: 10.7554/eLife.100541 (PMC11820110; doi:10.7554/eLife.100541)
Supplement: Figure 2—source data 1. [file elife-100541-fig2-data1.xlsx]

## Sheet: Figure 2B
DMSO	HF	BtdCPU	3610	0357
1.06382	1.7987	0.699303	1.77568	1.93245
1.09261	1.8368	0.709803	1.88988	1.99907
1.13111	1.85538	0.721371	1.91677	2.05521
1.14209	2.15292	0.734614	2.02644	2.08612
1.15316	2.18328	0.739079	2.21961	2.1104
1.18239	2.19252	0.742754	2.22201	2.21426
1.18774	2.2053	0.756027	2.22263	2.24164
1.21377	2.21471	0.762125	2.27977	2.27155
1.24024	2.21973	0.763068	2.32318	2.29313
1.24194	2.25307	0.764651	2.35886	2.30544
1.25439	2.25607	0.765673	2.36328	2.31078
1.26323	2.27947	0.768494	2.39153	2.3108
1.26675	2.29492	0.7687	2.3929	2.39914
1.27822	2.31528	0.775075	2.41294	2.4013
1.27918	2.33032	0.775192	2.43536	2.40415
1.2813	2.34534	0.777567	2.49916	2.40574
1.28688	2.36199	0.78098	2.55083	2.4095
1.29297	2.37689	0.785957	2.55585	2.41012
1.3015	2.38659	0.788998	2.59223	2.41304
1.30842	2.39589	0.795322	2.59811	2.4325
1.3136	2.41563	0.797386	2.60214	2.44586
1.32732	2.42805	0.804968	2.62362	2.47948
1.33723	2.46227	0.80632	2.62371	2.48357
1.34536	2.50399	0.806789	2.62528	2.49942
1.34591	2.51987	0.808681	2.65108	2.50534
1.34678	2.52348	0.811775	2.65631	2.53624
1.34884	2.55405	0.812	2.65989	2.57368
1.36015	2.5751	0.812466	2.67065	2.59432
1.36227	2.58121	0.813267	2.67742	2.60368
1.3633	2.61241	0.813404	2.68369	2.60653
1.36337	2.61246	0.814144	2.69016	2.62939
1.36514	2.63256	0.816788	2.69582	2.63319
1.37014	2.64252	0.817577	2.70074	2.65005
1.37544	2.66563	0.819757	2.72055	2.66029
1.38028	2.67401	0.820641	2.7431	2.68915
1.38634	2.67453	0.822818	2.74879	2.72014
1.38744	2.6891	0.823349	2.75169	2.72342
1.39342	2.74293	0.823586	2.75248	2.73479
1.39681	2.74718	0.824753	2.76075	2.73773
1.40116	2.76337	0.826431	2.78276	2.74263
1.40265	2.76858	0.828323	2.79151	2.74459
1.40274	2.79261	0.828888	2.79634	2.75883
1.41336	2.81313	0.830667	2.80718	2.77713
1.42017	2.83343	0.832611	2.81149	2.79412
1.42219	2.84193	0.833435	2.8423	2.82266
1.42879	2.85326	0.835464	2.85537	2.83453
1.43144	2.87164	0.835812	2.867	2.86339
1.43214	2.87377	0.838196	2.87434	2.87015
1.43443	2.88421	0.840862	2.87788	2.87485
1.43652	2.93705	0.842324	2.88964	2.87878
1.43904	2.96108	0.842896	2.89587	2.8907
1.4411	2.97004	0.843796	2.89813	2.91879
1.44417	2.97372	0.845203	2.91624	2.9191
1.44513	2.99928	0.846684	2.92891	2.93901
1.44573	3.00414	0.849419	2.9369	2.96466
1.45259	3.02691	0.850113	2.96811	2.98388
1.45393	3.04288	0.850727	2.96932	2.99129
1.45492	3.08342	0.851016	2.97356	3.01215
1.45753	3.12097	0.853706	2.97722	3.01808
1.46091	3.12518	0.854572	2.98472	3.05968
1.46124	3.12961	0.855793	2.99394	3.06776
1.46156	3.19925	0.856887	3.01428	3.07056
1.46242	3.2503	0.857115	3.02052	3.07925
1.46434	3.26865	0.863106	3.02654	3.08209
1.46513	3.27427	0.863239	3.02896	3.08459
1.46954	3.28738	0.867149	3.03434	3.0855
1.47247	3.3123	0.867447	3.03481	3.11787
1.47626	3.34393	0.867781	3.04816	3.13122
1.47828	3.34903	0.867794	3.05608	3.13191
1.48068	3.39931	0.867966	3.06981	3.14702
1.48145	3.40937	0.868763	3.07765	3.15067
1.48316	3.46538	0.871037	3.08112	3.15832
1.48464	3.46709	0.872368	3.09383	3.16023
1.48496	3.46944	0.87282	3.0973	3.17731
1.48712	3.47844	0.874831	3.11455	3.17908
1.48822	3.52915	0.879772	3.12604	3.19775
1.4884	3.54304	0.879814	3.13046	3.20569
1.49361	3.55328	0.879908	3.14642	3.2332
1.49388	3.58671	0.881454	3.14768	3.24738
1.50393	3.63474	0.883933	3.153	3.24905
1.50552	3.65658	0.884312	3.15613	3.26851
1.50624	3.66436	0.88604	3.15712	3.28748
1.51398	3.66484	0.886551	3.15742	3.31602
1.51556	3.6871	0.887634	3.16119	3.322
1.52124	3.69464	0.887795	3.16212	3.34069
1.53348	3.70358	0.887957	3.16255	3.37411
1.53511	3.72503	0.888268	3.1869	3.37874
1.53705	3.73568	0.889015	3.19266	3.38279
1.53787	3.75564	0.889389	3.19463	3.38863
1.54185	3.76925	0.890114	3.19708	3.39873
1.54382	3.78163	0.890213	3.21011	3.43477
1.54649	3.7901	0.89038	3.21172	3.44732
1.55115	3.80172	0.890669	3.21645	3.45284
1.5516	3.80335	0.891031	3.22034	3.45781
1.55343	3.81434	0.891967	3.23431	3.46717
1.55348	3.84613	0.892029	3.24503	3.47392
1.55348	3.85201	0.893425	3.24739	3.48476
1.56106	3.85903	0.894279	3.25071	3.49336
1.56231	3.86293	0.895355	3.25741	3.49434
1.56405	3.86389	0.89587	3.28003	3.4987
1.56857	3.88958	0.898738	3.2871	3.56125
1.56911	3.89392	0.900219	3.30807	3.61148
1.57108	3.91315	0.901659	3.30991	3.61202
1.57363	3.91408	0.902679	3.32655	3.61772
1.57629	3.92488	0.902969	3.33231	3.6191
1.57646	3.94376	0.90316	3.33725	3.62052
1.57809	3.96376	0.903706	3.3646	3.63564
1.57844	3.96493	0.903805	3.36533	3.65881
1.57869	3.96866	0.904747	3.37469	3.66217
1.58202	3.97614	0.905346	3.38729	3.67309
1.58558	3.98737	0.906565	3.38746	3.6734
1.58932	4.00587	0.90667	3.39161	3.71876
1.5974	4.01223	0.90818	3.39191	3.73847
1.60321	4.02434	0.909416	3.3986	3.74826
1.60618	4.0263	0.909816	3.40128	3.75116
1.60636	4.02827	0.911449	3.4045	3.75168
1.61447	4.03825	0.911743	3.42496	3.75789
1.61466	4.0686	0.911865	3.43106	3.76552
1.61848	4.0745	0.912525	3.45081	3.76711
1.62304	4.15353	0.913345	3.47748	3.78424
1.62435	4.1711	0.914195	3.48197	3.79816
1.62448	4.17169	0.916437	3.50541	3.79976
1.62703	4.18635	0.91684	3.50771	3.80752
1.62945	4.19189	0.916855	3.50771	3.83184
1.63033	4.21495	0.918285	3.51871	3.8577
1.63046	4.23584	0.91902	3.51966	3.8688
1.63801	4.25652	0.919891	3.52019	3.87193
1.64049	4.26577	0.921104	3.57932	3.93816
1.64164	4.28264	0.922897	3.59277	3.94308
1.64192	4.31096	0.923004	3.60626	3.95029
1.64587	4.31863	0.923355	3.62808	3.95483
1.64759	4.3274	0.923622	3.64812	3.95966
1.6492	4.33966	0.924431	3.66438	3.96413
1.64989	4.36351	0.924467	3.69716	3.97611
1.65469	4.36771	0.925417	3.70613	3.99355
1.65798	4.39133	0.926117	3.71124	4.00693
1.65843	4.40119	0.926659	3.73333	4.02239
1.65897	4.44767	0.926779	3.73631	4.02379
1.65929	4.4621	0.927846	3.73914	4.06273
1.66006	4.46457	0.92841	3.74945	4.06325
1.66451	4.51695	0.929893	3.7498	4.08235
1.66519	4.5464	0.929935	3.75862	4.1096
1.66532	4.57606	0.93182	3.76511	4.11536
1.66884	4.57619	0.932358	3.77772	4.14495
1.66975	4.57712	0.932755	3.78711	4.15379
1.67069	4.58218	0.933258	3.79757	4.1597
1.67526	4.58283	0.933424	3.80344	4.16565
1.67903	4.58629	0.936508	3.82936	4.18112
1.68025	4.58641	0.938625	3.83324	4.20014
1.68322	4.5924	0.938728	3.83643	4.20284
1.68429	4.60473	0.940353	3.85828	4.2063
1.68485	4.62497	0.940623	3.86729	4.21794
1.68634	4.69239	0.940971	3.87866	4.22279
1.68852	4.69507	0.941139	3.88546	4.227
1.6898	4.69983	0.941424	3.89172	4.2344
1.69013	4.70107	0.941544	3.907	4.24421
1.69292	4.71906	0.941612	3.94084	4.31561
1.69399	4.72124	0.942108	3.96896	4.3373
1.70049	4.72252	0.942223	4.00623	4.34466
1.70079	4.757	0.943119	4.00768	4.36354
1.70192	4.83224	0.94416	4.02282	4.37769
1.70309	4.84225	0.94463	4.02953	4.3988
1.70327	4.86208	0.94474	4.05308	4.43488
1.70485	4.87553	0.946335	4.06523	4.46106
1.70638	4.88413	0.946854	4.08927	4.47127
1.70988	4.91073	0.94728	4.10671	4.48887
1.71064	4.9162	0.947493	4.11601	4.49668
1.71538	4.931	0.947704	4.1665	4.51395
1.71542	4.9637	0.94799	4.16658	4.53884
1.71553	4.97903	0.948402	4.19357	4.54652
1.71577	4.98784	0.948515	4.21465	4.55304
1.71617	5.00364	0.948917	4.22328	4.57046
1.71921	5.05048	0.94928	4.24453	4.61333
1.72007	5.05235	0.950829	4.25058	4.65036
1.72202	5.05999	0.953621	4.27079	4.65777
1.72462	5.06556	0.954613	4.27126	4.69302
1.72623	5.06937	0.95467	4.30328	4.69315
1.72775	5.10471	0.955088	4.30944	4.70093
1.73126	5.11864	0.955879	4.31062	4.72077
1.73634	5.13533	0.95612	4.31564	4.73755
1.73957	5.17148	0.956467	4.34811	4.74655
1.74559	5.21894	0.958076	4.36137	4.78319
1.74608	5.25753	0.958148	4.364	4.81376
1.74717	5.27113	0.958645	4.37233	4.81915
1.74783	5.28482	0.959217	4.37692	4.8343
1.74911	5.29354	0.960466	4.38061	4.90826
1.75027	5.33988	0.960766	4.40637	4.91788
1.7515	5.44926	0.961437	4.42418	4.92595
1.75454	5.45261	0.962756	4.42562	4.94538
1.7565	5.46822	0.963001	4.42889	4.95479
1.75889	5.51107	0.964287	4.46699	5.04071
1.76767	5.55853	0.965088	4.47313	5.05095
1.7688	5.56625	0.966039	4.48759	5.06512
1.76886	5.56873	0.967216	4.52785	5.07439
1.77066	5.58106	0.968901	4.53143	5.09306
1.77067	5.71094	0.970249	4.55322	5.14803
1.77344	5.71162	0.970955	4.58983	5.15536
1.7815	5.71722	0.972549	4.59268	5.16289
1.78322	5.81791	0.974291	4.59778	5.20213
1.78364	5.89171	0.974435	4.59796	5.20988
1.7888	5.99603	0.974491	4.59884	5.22538
1.79018	6.09272	0.974865	4.61317	5.23279
1.79101	6.14554	0.975975	4.64825	5.23989
1.79114	6.15829	0.979004	4.67769	5.25999
1.79262	6.31743	0.979507	4.68234	5.32461
1.79346	6.3872	0.980166	4.69736	5.35664
1.79452	6.41727	0.980461	4.73522	5.36995
1.79742	6.44276	0.981781	4.7625	5.37596
1.79749	6.4481	0.982359	4.77458	5.39304
1.79863	6.46468	0.984756	4.77717	5.39678
1.79977	6.54084	0.985813	4.78576	5.42869
1.80212	6.66532	0.988091	4.78593	5.4362
1.80245	6.75493	0.988604	4.79702	5.44574
1.804	6.81306	0.993096	4.83855	5.51883
1.80475	6.81533	0.993409	4.84381	5.53077
1.80605	6.86153	0.993668	4.8545	5.56057
1.80682	6.86441	0.995312	4.86129	5.58112
1.80897	6.87789	0.996399	4.89265	5.64531
1.81129	6.90776	0.996754	4.89984	5.68073
1.81143	6.94501	0.996838	4.92657	5.72229
1.81236	6.99213	0.996941	4.93699	5.78323
1.81491	7.0687	0.997814	4.95199	5.83789
1.817	7.1504	0.998188	4.96985	5.86013
1.81816	7.16092	0.998796	4.97813	5.91136
1.81833	7.20989	0.998802	5.02165	5.93526
1.82378	7.22163	1	5.17893	5.94836
1.82762	7.25269	1.00037	5.20738	5.96698
1.83011	7.27291	1.00088	5.20787	5.97185
1.83019	7.32674	1.00165	5.21278	5.97802
1.83386	7.35753	1.00324	5.21338	5.99843
1.83441	7.38969	1.00346	5.22926	6.05421
1.83469	7.44578	1.00497	5.23754	6.05685
1.83568	7.47545	1.00523	5.24382	6.1027
1.83931	7.50322	1.00555	5.24829	6.12755
1.84315	7.60386	1.00719	5.25619	6.16829
1.84392	7.61768	1.00803	5.30605	6.24433
1.84718	7.64048	1.0089	5.32072	6.35437
1.84898	7.66673	1.009	5.32198	6.3941
1.84982	7.72413	1.00962	5.32924	6.44625
1.85159	7.91548	1.01067	5.35344	6.44942
1.85239	7.97875	1.01192	5.36173	6.45926
1.8524	8.0526	1.01199	5.37342	6.46514
1.85392	8.15349	1.01222	5.37833	6.48286
1.8556	8.1646	1.01264	5.38092	6.60746
1.8566	8.20718	1.01356	5.38577	6.62303
1.85692	8.3077	1.01364	5.39767	6.70437
1.86103	8.4024	1.01368	5.41019	6.7131
1.86749	8.52422	1.0149	5.44064	6.76672
1.86909	8.60405	1.01588	5.44624	6.85044
1.86935	8.61645	1.01635	5.48147	6.86136
1.87243	8.69428	1.01717	5.4954	6.92242
1.87309	8.70419	1.01724	5.51959	7.10127
1.87348	8.83488	1.01754	5.52534	7.14088
1.87507	8.95184	1.01757	5.5663	7.17062
1.87566	8.95387	1.0182	5.58126	7.20631
1.8757	8.98491	1.01921	5.5852	7.24789
1.87688	8.99006	1.01987	5.61841	7.26733
1.87741	9.09665	1.01993	5.66467	7.3059
1.87848	9.10131	1.01996	5.69817	7.30802
1.87882	9.24238	1.02105	5.72306	7.32275
1.88066	9.2628	1.02176	5.74879	7.50852
1.88565	9.43508	1.02211	5.76437	7.5099
1.88614	9.50503	1.02225	5.76513	7.51768
1.8877	9.52346	1.02227	5.79947	7.53893
1.89323	9.57427	1.02292	5.86588	7.5451
1.90099	9.60279	1.02386	5.90745	7.57785
1.90137	9.63741	1.02459	5.9088	7.58649
1.90572	10.0427	1.02521	5.92615	7.59702
1.90639	10.3506	1.02574	5.97993	7.62155
1.9067	10.5332	1.0261	6.00343	7.6417
1.90716	10.7415	1.02611	6.0182	7.66631
1.91414	10.8378	1.02639	6.01904	7.96765
1.91599	11.3174	1.02716	6.1101	8.06777
1.91605	11.4495	1.02956	6.18747	8.11035
1.91708	11.5719	1.02975	6.23198	8.1557
1.91858	11.5821	1.02995	6.23345	8.4566
1.91957	11.6036	1.03049	6.3003	8.53719
1.91975	11.7434	1.03134	6.33215	8.59283
1.92023	11.8924	1.03204	6.40586	8.69559
1.92036	11.9606	1.03254	6.45537	8.75461
1.92101	11.9743	1.03281	6.48035	9.03617
1.92336	12.0396	1.03312	6.65869	9.0447
1.92506	12.0635	1.03314	6.66527	9.2412
1.92851	12.0747	1.03397	6.78809	9.24184
1.92956	12.139	1.03484	6.82104	9.37756
1.9304	12.1951	1.03613	6.88914	9.48787
1.93137	12.2034	1.03653	6.8994	9.5562
1.9323	12.2748	1.03753	6.94334	9.61515
1.93342	12.3287	1.03756	6.98978	9.68818
1.93555	12.6823	1.03784	7.04495	9.73714
1.94099	12.947	1.03796	7.07435	9.78347
1.94176	13.4054	1.03806	7.13393	10.0281
1.94363	13.6665	1.03889	7.14567	10.1013
1.94419	13.8779	1.03926	7.20305	10.114
1.94513	14.0349	1.03992	7.30047	10.2988
1.94562	14.1723	1.04018	7.33871	10.3598
1.94749	14.354	1.04041	7.37637	10.9135
1.94866	14.4135	1.04227	7.38152	11.0504
1.95005	14.622	1.04371	7.4087	11.2824
1.95097	15.2778	1.04498	7.42724	11.6514
1.95168	15.2927	1.04567	7.44326	11.8226
1.9538	15.5119	1.04568	7.46524	11.8881
1.95558	15.5379	1.04584	7.50959	12.5028
1.95589	15.5901	1.04729	7.57098	12.8909
1.95626	15.8036	1.0475	7.58103	12.8934
1.95833	15.8535	1.04874	7.73113	12.923
1.95834	16.4414	1.04951	7.79835	13.0148
1.95896	16.4437	1.04992	7.81075	13.1005
1.96397	16.4557	1.05001	7.84208
1.9679	16.5151	1.05115	7.87203
1.96919	17.3942	1.05126	8.07815
1.96951	17.5335	1.0515	8.1111
1.97017	18.2506	1.05264	8.16509
1.97126	18.2894	1.05299	8.19485
1.97271		1.05315	8.21132
1.97309		1.05354	8.25327
1.97507		1.05426	8.3234
1.9754		1.05429	8.36638
1.97557		1.05431	8.40422
1.97602		1.05433	8.52657
1.97802		1.05444	8.55515
1.97896		1.05537	8.578
1.97952		1.05555	8.60741
1.97967		1.05754	8.62119
1.98292		1.05785	8.64595
1.98328		1.05814	8.68495
1.98532		1.05933	8.69727
1.98631		1.06145	8.99875
1.98698		1.06186	9.00553
1.98738		1.06198	9.29919
1.98948		1.06287	9.51294
1.98994		1.06337	9.57483
1.99081		1.064	9.61433
1.99102		1.06526	9.66452
1.99119		1.06604	9.78247
2.00115		1.06625	9.92388
2.00516		1.06708	10.0226
2.00674		1.06802	10.1595
2.0097		1.0688	10.2243
2.01231		1.06902	10.4112
2.01238		1.07013	10.445
2.01926		1.07094	10.5495
2.01974		1.07098	10.6734
2.02089		1.07131	10.7421
2.02226		1.07138	10.7748
2.0229		1.07151	10.8308
2.02302		1.07164	10.9152
2.02391		1.07213	10.9975
2.02771		1.07228	11.0606
2.02798		1.07247	11.1951
2.0299		1.0725	11.4444
2.03388		1.07259	11.4552
2.03411		1.07287	11.4702
2.04037		1.07367	11.5659
2.04049		1.07445	11.8335
2.04261		1.07455	11.8845
2.04461		1.0751	11.9643
2.04731		1.07555	12.0959
2.04831		1.0758	12.3785
2.05045		1.07635	12.7961
2.05109		1.07683	12.8761
2.0524		1.07685	13.0639
2.05458		1.07884	13.2922
2.05505		1.07891	13.3649
2.05805		1.07913	13.7941
2.05856		1.07918
2.05992		1.07981
2.06047		1.08096
2.06147		1.0821
2.06258		1.08236
2.06566		1.08322
2.06756		1.08372
2.06769		1.08418
2.07091		1.08434
2.07418		1.08477
2.07829		1.08595
2.07944		1.08624
2.07962		1.0865
2.08269		1.0872
2.08324		1.08818
2.08484		1.08828
2.08589		1.08886
2.08915		1.08891
2.0897		1.08951
2.09013		1.09066
2.09123		1.09084
2.09205		1.09086
2.09206		1.09113
2.09216		1.09185
2.09306		1.09212
2.09358		1.09229
2.09685		1.09237
2.09723		1.09358
2.09972		1.0949
2.10133		1.0968
2.10297		1.09705
2.10354		1.09754
2.10384		1.10029
2.10423		1.10033
2.10521		1.10059
2.10596		1.10062
2.10938		1.10199
2.11055		1.10212
2.11214		1.10358
2.11353		1.10399
2.11426		1.10449
2.11983		1.10498
2.12084		1.10591
2.12286		1.10626
2.12319		1.10629
2.12339		1.10654
2.12636		1.10685
2.12753		1.10703
2.1285		1.10747
2.13181		1.10864
2.13309		1.10926
2.13427		1.10957
2.13993		1.11243
2.14394		1.1131
2.14409		1.1137
2.14618		1.11384
2.14701		1.11418
2.14705		1.11452
2.14773		1.11587
2.14806		1.11644
2.14889		1.11662
2.14917		1.1167
2.15019		1.11704
2.15044		1.11842
2.15146		1.11942
2.15496		1.12031
2.15574		1.12039
2.15636		1.12041
2.15784		1.12099
2.16086		1.12111
2.16149		1.12114
2.16209		1.12146
2.16743		1.12184
2.16821		1.12236
2.17007		1.12257
2.17073		1.1232
2.17216		1.12322
2.17281		1.12342
2.17422		1.12347
2.1761		1.12365
2.18159		1.12366
2.18224		1.12422
2.1825		1.12434
2.18319		1.12435
2.18438		1.12502
2.18548		1.12556
2.18813		1.12691
2.1893		1.12777
2.1927		1.12793
2.19287		1.12888
2.19294		1.12974
2.19527		1.13081
2.1971		1.13117
2.19834		1.13118
2.20005		1.13142
2.20331		1.13199
2.2099		1.13214
2.21197		1.13239
2.21326		1.13306
2.21985		1.13346
2.21994		1.1339
2.22334		1.13458
2.22676		1.13479
2.2285		1.13509
2.22945		1.13577
2.23041		1.13607
2.23465		1.13678
2.23496		1.13682
2.23499		1.13691
2.2389		1.13821
2.2402		1.1387
2.24037		1.13894
2.24408		1.1391
2.24657		1.13919
2.2475		1.13934
2.24814		1.13969
2.24889		1.13969
2.25107		1.13995
2.25165		1.1404
2.25234		1.14068
2.25383		1.14135
2.25394		1.14154
2.25529		1.14236
2.25638		1.14265
2.25833		1.14285
2.25866		1.14292
2.25957		1.14311
2.2597		1.1432
2.26088		1.14339
2.26804		1.14389
2.2683		1.14403
2.26922		1.14532
2.26964		1.14537
2.27044		1.14553
2.27248		1.1461
2.27593		1.14614
2.27608		1.14638
2.27644		1.14655
2.28351		1.14679
2.28407		1.1479
2.28487		1.14818
2.28509		1.14837
2.28617		1.14895
2.28766		1.14969
2.28897		1.14995
2.28962		1.15021
2.30213		1.15058
2.30453		1.15086
2.30584		1.15089
2.30611		1.15098
2.30754		1.15208
2.31547		1.15231
2.31627		1.15254
2.31836		1.15282
2.31865		1.15335
2.32492		1.15342
2.32603		1.15393
2.32756		1.15412
2.3278		1.15428
2.32861		1.15576
2.33173		1.15616
2.33221		1.1562
2.33309		1.15753
2.33801		1.15961
2.33808		1.16039
2.33858		1.16051
2.33981		1.1606
2.34158		1.16072
2.34385		1.16116
2.34921		1.16165
2.35147		1.16251
2.35202		1.16268
2.35208		1.16285
2.35363		1.16313
2.3551		1.16395
2.35728		1.16396
2.36558		1.16408
2.36718		1.16415
2.36766		1.16419
2.37012		1.16426
2.37099		1.16502
2.37287		1.16641
2.37372		1.16684
2.37437		1.16772
2.37879		1.16778
2.3805		1.16805
2.38235		1.1688
2.38412		1.16901
2.38796		1.16902
2.39225		1.16907
2.39587		1.16966
2.39796		1.17067
2.39869		1.17102
2.39917		1.17164
2.39935		1.17256
2.40556		1.17272
2.40635		1.17316
2.41118		1.17325
2.41121		1.17326
2.41634		1.1737
2.41653		1.17387
2.41956		1.17543
2.42042		1.17551
2.42088		1.17555
2.42706		1.17597
2.42883		1.17715
2.42947		1.17728
2.4328		1.17735
2.43509		1.17762
2.43707		1.17774
2.43759		1.17847
2.43788		1.17863
2.44031		1.17925
2.44088		1.17982
2.44136		1.1799
2.44318		1.18011
2.44475		1.18015
2.44611		1.18125
2.4481		1.18326
2.44891		1.18435
2.45069		1.18448
2.45424		1.18481
2.45552		1.18628
2.45924		1.18652
2.46818		1.18716
2.46869		1.18848
2.47556		1.18895
2.47596		1.18931
2.47688		1.18954
2.47968		1.19006
2.48133		1.19083
2.48445		1.1909
2.48559		1.19118
2.48719		1.19159
2.49465		1.19178
2.49542		1.19234
2.49773		1.1936
2.49911		1.19424
2.50056		1.19464
2.50167		1.19592
2.50188		1.19617
2.50551		1.19626
2.50624		1.19737
2.50852		1.19982
2.51291		1.20127
2.5144		1.20168
2.51759		1.20284
2.51865		1.20353
2.51893		1.20362
2.51943		1.2038
2.52379		1.2047
2.5289		1.20489
2.53097		1.20658
2.53106		1.20671
2.53481		1.20728
2.5368		1.2075
2.53901		1.20761
2.54124		1.20817
2.54158		1.2083
2.54434		1.20842
2.54875		1.20911
2.55739		1.2098
2.55803		1.21011
2.56092		1.21101
2.56151		1.21207
2.56267		1.21225
2.56268		1.21291
2.56351		1.21335
2.5637		1.21352
2.56699		1.21465
2.57682		1.21562
2.57718		1.2159
2.57723		1.21629
2.57916		1.2163
2.57991		1.21649
2.58072		1.21675
2.58344		1.21807
2.5852		1.21892
2.58719		1.2196
2.588		1.21985
2.58846		1.21987
2.59225		1.22072
2.5923		1.22103
2.59283		1.22182
2.5958		1.22245
2.5987		1.2225
2.5988		1.22282
2.60599		1.22294
2.60883		1.22368
2.60912		1.22407
2.6099		1.22447
2.6099		1.22451
2.61343		1.22863
2.61475		1.2295
2.6149		1.2296
2.61988		1.2301
2.62421		1.23069
2.62459		1.2309
2.62685		1.23274
2.62854		1.23351
2.6297		1.23365
2.63041		1.23435
2.63181		1.23435
2.63562		1.23453
2.63634		1.23467
2.63754		1.23483
2.64002		1.23509
2.64136		1.23526
2.64148		1.23535
2.6419		1.2375
2.64645		1.23809
2.64764		1.23854
2.64795		1.23965
2.65251		1.23971
2.65354		1.23982
2.6581		1.24033
2.66346		1.24078
2.66916		1.24104
2.67131		1.24129
2.67486		1.24168
2.67544		1.24277
2.67722		1.24381
2.68772		1.24475
2.68839		1.24479
2.68969		1.24594
2.69172		1.24631
2.69512		1.24647
2.69929		1.24656
2.70205		1.2466
2.70949		1.24666
2.70997		1.24754
2.71052		1.24758
2.71257		1.24839
2.7179		1.24847
2.72475		1.2485
2.72486		1.2488
2.72681		1.24953
2.73586		1.25085
2.73716		1.25098
2.73989		1.25151
2.74066		1.25167
2.74158		1.25187
2.74574		1.25289
2.74699		1.25328
2.75196		1.25436
2.75611		1.25469
2.7606		1.25534
2.76071		1.25585
2.76352		1.25685
2.7692		1.25705
2.77533		1.25725
2.78043		1.25884
2.78872		1.25923
2.78896		1.25938
2.79115		1.26041
2.79781		1.26046
2.79803		1.26072
2.79919		1.26087
2.80021		1.26175
2.80519		1.26344
2.80801		1.26389
2.81203		1.26479
2.81413		1.265
2.81613		1.26525
2.81941		1.2653
2.81998		1.26561
2.82006		1.26572
2.82158		1.26808
2.82174		1.26981
2.82475		1.26986
2.8252		1.27081
2.82671		1.27113
2.83053		1.27139
2.83265		1.27273
2.83662		1.27471
2.83847		1.27555
2.83925		1.27621
2.8409		1.27678
2.84291		1.27739
2.84352		1.27805
2.84439		1.27815
2.8489		1.27818
2.84957		1.27844
2.85027		1.2786
2.85596		1.27874
2.8588		1.27972
2.86028		1.27993
2.86127		1.28144
2.86173		1.28185
2.86329		1.28249
2.86574		1.28294
2.86754		1.28318
2.86901		1.28393
2.86996		1.28407
2.87597		1.28455
2.88335		1.28466
2.88672		1.28551
2.88728		1.28575
2.88784		1.28677
2.89006		1.28714
2.89381		1.2875
2.89769		1.2879
2.9016		1.28815
2.90267		1.28931
2.90745		1.28982
2.90818		1.29029
2.91512		1.29069
2.91584		1.29132
2.91807		1.29156
2.92218		1.29296
2.92236		1.29301
2.92509		1.2937
2.92552		1.29594
2.92748		1.29613
2.92842		1.29656
2.93105		1.29687
2.93198		1.29818
2.93404		1.29825
2.93435		1.29874
2.93581		1.29916
2.94153		1.29982
2.95861		1.30011
2.97677		1.30048
2.97936		1.30063
2.98019		1.30222
2.98248		1.30252
2.98249		1.30258
2.98335		1.30349
2.9884		1.30408
2.99058		1.30423
2.99121		1.30429
2.99553		1.30455
2.998		1.30459
3.00213		1.30492
3.0043		1.30499
3.01639		1.30626
3.01675		1.30651
3.01781		1.30704
3.02193		1.30749
3.02452		1.309
3.02954		1.30951
3.03691		1.30972
3.03723		1.3114
3.04065		1.31169
3.05483		1.3121
3.06317		1.31279
3.06408		1.31281
3.06433		1.31287
3.06558		1.3129
3.0665		1.31322
3.06825		1.31381
3.07275		1.31385
3.07362		1.31431
3.07405		1.31555
3.07812		1.31869
3.07839		1.31913
3.0836		1.31925
3.08493		1.32159
3.08502		1.3231
3.08875		1.32359
3.09191		1.32447
3.09294		1.32449
3.09487		1.32463
3.09554		1.32489
3.09569		1.32492
3.09752		1.32605
3.09879		1.32665
3.11108		1.32666
3.11385		1.32994
3.11557		1.33046
3.12149		1.33141
3.12272		1.33169
3.12535		1.33226
3.12699		1.33289
3.13239		1.33295
3.13631		1.333
3.13833		1.33346
3.14105		1.33533
3.1416		1.3366
3.14821		1.33671
3.15803		1.33708
3.16298		1.33708
3.16499		1.33713
3.16746		1.33726
3.16814		1.33743
3.1788		1.33848
3.18702		1.33919
3.18753		1.33937
3.19184		1.33968
3.19718		1.34077
3.20213		1.34087
3.20609		1.34097
3.20947		1.34218
3.21248		1.3432
3.21545		1.34376
3.21619		1.34424
3.21854		1.34499
3.21865		1.34507
3.22068		1.34508
3.22597		1.34623
3.22993		1.34651
3.23318		1.34666
3.23412		1.3472
3.23909		1.34812
3.24562		1.34833
3.2507		1.34972
3.25756		1.34973
3.26099		1.35018
3.2613		1.35148
3.26154		1.35231
3.27522		1.35376
3.27541		1.35391
3.2781		1.35393
3.27979		1.35398
3.28083		1.35445
3.28343		1.35518
3.28437		1.35537
3.29015		1.35665
3.29163		1.35879
3.29401		1.35879
3.29482		1.35888
3.30483		1.35939
3.3135		1.36042
3.31532		1.36094
3.32642		1.36168
3.33506		1.36209
3.33587		1.36298
3.33617		1.36309
3.33685		1.36322
3.33729		1.36463
3.34105		1.36468
3.34313		1.36514
3.34384		1.36632
3.35224		1.36685
3.3539		1.36692
3.35635		1.37012
3.35766		1.37138
3.3602		1.37206
3.36649		1.37261
3.3679		1.37276
3.37239		1.37365
3.37676		1.37428
3.38136		1.37437
3.38451		1.37502
3.39149		1.37521
3.39977		1.37734
3.39988		1.37854
3.40004		1.37873
3.40191		1.3791
3.4039		1.37955
3.40462		1.37957
3.40497		1.38071
3.41623		1.38101
3.4173		1.38185
3.42641		1.38232
3.43527		1.38262
3.4373		1.38274
3.43916		1.38316
3.44258		1.38577
3.44356		1.38619
3.44415		1.38647
3.45734		1.38805
3.45758		1.38929
3.46391		1.39001
3.47075		1.39011
3.47127		1.39144
3.47419		1.39153
3.47467		1.39324
3.47806		1.39363
3.47974		1.39365
3.50302		1.39393
3.50734		1.3945
3.51506		1.3952
3.51565		1.39727
3.5208		1.39958
3.52863		1.39975
3.53505		1.40002
3.54073		1.4003
3.54201		1.4005
3.54485		1.40067
3.54684		1.40085
3.54972		1.40121
3.55094		1.40186
3.55449		1.40233
3.5565		1.40273
3.55798		1.40299
3.56409		1.4031
3.57701		1.40363
3.58012		1.40381
3.59381		1.40557
3.59463		1.40611
3.59694		1.40654
3.59775		1.40687
3.60829		1.40822
3.61205		1.40868
3.61343		1.40927
3.61457		1.40989
3.62985		1.40998
3.63268		1.41166
3.6348		1.41234
3.63805		1.41238
3.64012		1.41255
3.64407		1.41276
3.646		1.41315
3.64672		1.41323
3.64673		1.41358
3.64761		1.41463
3.6499		1.41482
3.65767		1.4166
3.65767		1.41766
3.66237		1.41783
3.67413		1.41804
3.67882		1.41974
3.68077		1.42196
3.68916		1.42226
3.70091		1.42245
3.70241		1.42446
3.70792		1.42468
3.71376		1.4251
3.71507		1.42724
3.71531		1.42782
3.71662		1.42802
3.72017		1.4287
3.72038		1.43017
3.72218		1.43022
3.72279		1.43215
3.72403		1.43217
3.72595		1.43258
3.72916		1.43271
3.73366		1.43358
3.74093		1.43396
3.74144		1.43427
3.76308		1.43462
3.76391		1.43488
3.77309		1.43639
3.77922		1.43735
3.78288		1.43816
3.78519		1.43927
3.78851		1.4401
3.7942		1.44105
3.79553		1.4412
3.79577		1.44161
3.80396		1.44285
3.80423		1.44389
3.80659		1.44544
3.80876		1.44818
3.80901		1.44847
3.81477		1.44875
3.8161		1.44923
3.8387		1.4494
3.84194		1.44947
3.84415		1.45048
3.85239		1.45143
3.85341		1.45267
3.85928		1.45284
3.86072		1.45468
3.86346		1.45506
3.86768		1.45543
3.86999		1.4558
3.87211		1.45612
3.87462		1.45735
3.88845		1.45741
3.88904		1.45826
3.88971		1.4584
3.90701		1.45847
3.92038		1.45877
3.92082		1.45906
3.92375		1.46002
3.9277		1.46058
3.94038		1.46101
3.94341		1.46139
3.94584		1.46155
3.94719		1.46193
3.95198		1.46201
3.95943		1.46347
3.96012		1.46707
3.96093		1.46841
3.96249		1.46916
3.96591		1.46945
3.96865		1.46962
3.9779		1.46995
3.99623		1.46997
3.99739		1.46999
3.99963		1.47004
4.0012		1.47246
4.00191		1.47298
4.00525		1.47311
4.01072		1.47435
4.01904		1.47444
4.01967		1.47459
4.02335		1.47459
4.02659		1.47506
4.03279		1.47588
4.04066		1.48032
4.04308		1.48073
4.04632		1.48083
4.05809		1.48308
4.06362		1.48322
4.06697		1.48362
4.07817		1.48377
4.07886		1.48475
4.07972		1.48496
4.08252		1.48551
4.08773		1.48623
4.09073		1.48692
4.0934		1.48721
4.09487		1.48735
4.09651		1.48841
4.11317		1.48895
4.12339		1.48966
4.12845		1.48983
4.13539		1.49013
4.1395		1.49203
4.14673		1.49242
4.15189		1.49249
4.15359		1.49255
4.16929		1.49319
4.17064		1.49339
4.17139		1.49407
4.18005		1.49477
4.18367		1.49489
4.1936		1.49673
4.19792		1.49897
4.20397		1.49996
4.20674		1.5038
4.21965		1.50382
4.22192		1.50479
4.23314		1.50542
4.23731		1.50555
4.26311		1.50735
4.26447		1.50758
4.26804		1.50765
4.27752		1.50786
4.28751		1.50898
4.29233		1.50922
4.29296		1.51012
4.29337		1.51111
4.30322		1.51131
4.31503		1.51197
4.31904		1.51374
4.333		1.51517
4.33382		1.51692
4.35943		1.51774
4.37405		1.51812
4.37955		1.51858
4.38138		1.52094
4.38534		1.52214
4.38627		1.523
4.38909		1.52328
4.40339		1.52365
4.4174		1.52433
4.41829		1.52438
4.42108		1.52453
4.42344		1.52576
4.43327		1.52635
4.44299		1.5269
4.45133		1.52786
4.4519		1.52804
4.48484		1.52856
4.49498		1.52857
4.50781		1.52861
4.52017		1.53039
4.52759		1.5318
4.53457		1.53184
4.54468		1.53226
4.55864		1.53325
4.56013		1.53399
4.56399		1.53651
4.56635		1.53681
4.57812		1.53744
4.58488		1.53843
4.58604		1.53974
4.59789		1.54019
4.60114		1.5408
4.61251		1.5416
4.62309		1.54175
4.62505		1.54381
4.62579		1.54408
4.64439		1.54414
4.66821		1.54427
4.67		1.54436
4.68863		1.54438
4.68877		1.54469
4.69678		1.54499
4.70471		1.54672
4.70485		1.54726
4.70575		1.54865
4.71601		1.54871
4.7243		1.54947
4.73101		1.5498
4.73556		1.55018
4.742		1.55065
4.7442		1.55135
4.74891		1.55146
4.75362		1.55153
4.76958		1.55155
4.77187		1.55389
4.78121		1.55428
4.79022		1.55498
4.80566		1.55558
4.81734		1.55563
4.83151		1.55596
4.83957		1.55668
4.8414		1.55812
4.84583		1.55972
4.84969		1.56011
4.85605		1.56076
4.86002		1.56141
4.86156		1.56142
4.86486		1.56234
4.86616		1.56376
4.87069		1.56487
4.87327		1.56526
4.88558		1.56619
4.89789		1.5662
4.90235		1.56692
4.91966		1.56713
4.91968		1.56812
4.92199		1.56821
4.9317		1.57079
4.93671		1.57165
4.93752		1.57207
4.93883		1.57311
4.9512		1.5741
4.95781		1.57477
4.96017		1.575
4.96053		1.57532
4.96924		1.57643
4.98207		1.57668
4.99549		1.5774
5.00528		1.57833
5.03603		1.57893
5.04664		1.57927
5.0472		1.57952
5.04774		1.57999
5.06551		1.58001
5.07331		1.58037
5.07574		1.58149
5.08433		1.58195
5.0926		1.58469
5.10947		1.58498
5.12161		1.58578
5.13141		1.58588
5.13173		1.58958
5.1536		1.59066
5.16883		1.59067
5.17796		1.59111
5.18043		1.59117
5.21478		1.59229
5.23929		1.59296
5.24046		1.59374
5.24165		1.59375
5.25983		1.59602
5.28304		1.5969
5.29021		1.59704
5.30883		1.59832
5.32324		1.5984
5.32457		1.59998
5.3252		1.60221
5.3437		1.60448
5.35517		1.60483
5.36661		1.60598
5.3872		1.60636
5.43963		1.6066
5.44377		1.60863
5.4825		1.6089
5.48547		1.61124
5.49139		1.61141
5.49172		1.61203
5.49677		1.61301
5.49914		1.61369
5.50033		1.61624
5.52149		1.61817
5.52413		1.61842
5.52513		1.61859
5.55544		1.61886
5.55853		1.61934
5.56011		1.62014
5.56229		1.62166
5.56702		1.62197
5.59182		1.62223
5.59409		1.62415
5.59518		1.62556
5.5962		1.6264
5.60081		1.62657
5.60583		1.62679
5.6066		1.62702
5.61123		1.62813
5.61279		1.62971
5.61703		1.63031
5.62312		1.6311
5.63876		1.63187
5.64318		1.63403
5.64656		1.63404
5.66419		1.63414
5.68048		1.63422
5.68731		1.63516
5.69041		1.63565
5.6922		1.63724
5.69868		1.6373
5.7105		1.6375
5.71418		1.63795
5.72358		1.64055
5.74324		1.64076
5.74608		1.64088
5.76543		1.6418
5.76892		1.64217
5.81776		1.64254
5.81818		1.64283
5.81915		1.64332
5.82129		1.64333
5.86127		1.64591
5.87308		1.64598
5.89262		1.64623
5.89762		1.64677
5.90015		1.64716
5.90764		1.64839
5.92371		1.65004
5.93784		1.65025
5.95073		1.6504
5.95365		1.65155
5.95618		1.65168
5.96988		1.65281
5.97193		1.65387
5.97697		1.65427
5.97752		1.65665
5.98073		1.65706
5.98824		1.65739
5.98877		1.65744
5.99516		1.65774
5.99724		1.65843
6.0078		1.65861
6.01071		1.65897
6.01228		1.65927
6.03578		1.65938
6.04563		1.65989
6.04817		1.66189
6.07773		1.66208
6.10983		1.66235
6.1146		1.66288
6.13073		1.66296
6.15741		1.66571
6.15866		1.6659
6.16974		1.66595
6.20855		1.66619
6.24191		1.66793
6.25396		1.66846
6.26954		1.67166
6.27798		1.67184
6.2886		1.67251
6.301		1.67312
6.30937		1.67347
6.31608		1.67458
6.31686		1.67534
6.33978		1.67575
6.34037		1.67735
6.34068		1.67794
6.34997		1.67802
6.35329		1.67982
6.36037		1.68174
6.3742		1.68349
6.4062		1.68377
6.40654		1.68382
6.42522		1.68502
6.43625		1.68613
6.49661		1.6865
6.51053		1.68813
6.53133		1.68913
6.53173		1.68949
6.53656		1.69083
6.54504		1.69213
6.58595		1.69249
6.58958		1.69278
6.59979		1.69649
6.6019		1.6974
6.60987		1.69852
6.63116		1.69927
6.65233		1.69982
6.66844		1.70078
6.67669		1.70096
6.70021		1.70162
6.7255		1.70332
6.72878		1.70416
6.74501		1.70434
6.79688		1.70686
6.79835		1.70702
6.82292		1.70757
6.82528		1.70898
6.85734		1.70948
6.85792		1.71077
6.8651		1.71083
6.88637		1.71102
6.88743		1.71217
6.90551		1.71217
6.90818		1.71257
6.92141		1.71355
6.94352		1.71418
6.94839		1.71587
7.02163		1.71599
7.04302		1.71696
7.08008		1.71919
7.0843		1.72009
7.10059		1.72027
7.11337		1.72065
7.1503		1.72086
7.15991		1.72242
7.18611		1.72376
7.23791		1.72447
7.25159		1.72618
7.25942		1.72683
7.27551		1.72839
7.29066		1.72839
7.29089		1.72877
7.29116		1.7289
7.31131		1.72914
7.31387		1.72985
7.35688		1.7301
7.3632		1.73071
7.37019		1.7309
7.37062		1.73145
7.37943		1.73331
7.38788		1.73417
7.41475		1.73511
7.42468		1.73553
7.44344		1.73586
7.45454		1.73643
7.45957		1.73885
7.46902		1.7398
7.50922		1.73995
7.53396		1.74059
7.57394		1.74201
7.58834		1.74223
7.60098		1.74294
7.62335		1.74375
7.67036		1.74433
7.72036		1.74486
7.75383		1.74511
7.76172		1.7462
7.77005		1.74625
7.78769		1.74995
7.79055		1.75139
7.80236		1.75309
7.81524		1.75309
7.81902		1.75669
7.87247		1.75863
7.94782		1.7587
8.01929		1.7593
8.02254		1.76244
8.08598		1.76247
8.15747		1.76302
8.21117		1.76324
8.22121		1.76765
8.24142		1.76891
8.24426		1.7691
8.25526		1.76928
		1.7699
		1.77134
		1.77162
		1.77301
		1.77455
		1.77819
		1.77854
		1.77924
		1.77936
		1.7808
		1.78128
		1.78178
		1.78411
		1.78434
		1.78452
		1.78516
		1.78581
		1.78591
		1.7868
		1.78863
		1.78935
		1.78936
		1.78947
		1.79048
		1.79055
		1.79118
		1.79276
		1.7933
		1.79376
		1.79444
		1.79459
		1.79551
		1.79595
		1.79596
		1.79603
		1.7962
		1.79639
		1.79864
		1.80063
		1.80212
		1.80319
		1.80499
		1.80636
		1.80644
		1.80781
		1.80935
		1.81002
		1.81263
		1.81511
		1.81526
		1.81541
		1.81654
		1.817
		1.81785
		1.81796
		1.82165
		1.82223
		1.82401
		1.82473
		1.82778
		1.8286
		1.82969
		1.83003
		1.83254
		1.83434
		1.83458
		1.8352
		1.83591
		1.83654
		1.83877
		1.83884
		1.83919
		1.83971
		1.84095
		1.84147
		1.84156
		1.84412
		1.84586
		1.84633
		1.8471
		1.84792
		1.84835
		1.84893
		1.85124
		1.85157
		1.85173
		1.85233
		1.8527
		1.85532
		1.85577
		1.85608
		1.85741
		1.85856
		1.85874
		1.85877
		1.86037
		1.86101
		1.86237
		1.86286
		1.86325
		1.86403
		1.86805
		1.86825
		1.86918
		1.8699
		1.87006
		1.87047
		1.87225
		1.87288
		1.87334
		1.87349
		1.874
		1.8741
		1.87418
		1.87486
		1.87514
		1.87515
		1.87607
		1.87975
		1.88165
		1.88225
		1.88317
		1.88402
		1.88655
		1.88656
		1.88703
		1.88792
		1.88969
		1.89058
		1.89066
		1.89168
		1.89206
		1.89233
		1.89447
		1.89601
		1.8963
		1.89637
		1.8969
		1.89911
		1.90056
		1.9013
		1.90164
		1.90256
		1.90273
		1.90416
		1.90495
		1.90572
		1.90573
		1.907
		1.90726
		1.90851
		1.90911
		1.91035
		1.91049
		1.91053
		1.91092
		1.9126
		1.91316
		1.91387
		1.91859
		1.91983
		1.92191
		1.92423
		1.92432
		1.92628
		1.92645
		1.92741
		1.92896
		1.92922
		1.92968
		1.93015
		1.93045
		1.9318
		1.93346
		1.93608
		1.93777
		1.93806
		1.94087
		1.94124
		1.94263
		1.94424
		1.94613
		1.94653
		1.94654
		1.94805
		1.95099
		1.95147
		1.95155
		1.95187
		1.9532
		1.95372
		1.954
		1.95589
		1.95985
		1.96005
		1.96091
		1.96206
		1.96231
		1.9635
		1.96488
		1.96494
		1.96502
		1.96659
		1.96756
		1.96843
		1.96889
		1.97137
		1.9717
		1.97519
		1.97522
		1.97644
		1.97799
		1.97884
		1.98178
		1.98434
		1.98763
		1.98822
		1.98888
		1.99053
		1.99116
		1.9913
		1.99457
		2.00043
		2.00187
		2.00279
		2.00352
		2.0043
		2.00568
		2.0077
		2.00907
		2.00939
		2.00945
		2.00994
		2.01191
		2.01314
		2.01407
		2.0141
		2.01475
		2.01606
		2.0162
		2.01832
		2.01897
		2.01964
		2.02186
		2.02377
		2.0238
		2.02656
		2.02701
		2.02724
		2.02954
		2.03053
		2.03226
		2.03233
		2.03511
		2.036
		2.03736
		2.04062
		2.04128
		2.04154
		2.04172
		2.04317
		2.04333
		2.04364
		2.04379
		2.04484
		2.04561
		2.04612
		2.04618
		2.04682
		2.04919
		2.04951
		2.05102
		2.05157
		2.05244
		2.05354
		2.054
		2.05461
		2.05495
		2.05695
		2.05829
		2.06393
		2.06458
		2.06578
		2.0675
		2.06914
		2.06932
		2.07262
		2.07368
		2.07462
		2.07518
		2.07779
		2.07855
		2.0797
		2.08097
		2.08311
		2.084
		2.08609
		2.08713
		2.08907
		2.09018
		2.09158
		2.09197
		2.09262
		2.09281
		2.0948
		2.09598
		2.09677
		2.09776
		2.09832
		2.09855
		2.09933
		2.10025
		2.10172
		2.10569
		2.10571
		2.10577
		2.11115
		2.1115
		2.11371
		2.11495
		2.11517
		2.1154
		2.11661
		2.11868
		2.11897
		2.11972
		2.12028
		2.12093
		2.12212
		2.12422
		2.12615
		2.12628
		2.12803
		2.12896
		2.12914
		2.13136
		2.13196
		2.13261
		2.13542
		2.13574
		2.13615
		2.13694
		2.13708
		2.13779
		2.13791
		2.13927
		2.13982
		2.13991
		2.14006
		2.14058
		2.14175
		2.142
		2.14229
		2.14542
		2.14651
		2.14655
		2.14735
		2.14739
		2.14927
		2.15025
		2.15091
		2.15195
		2.1554
		2.15547
		2.15638
		2.15821
		2.16208
		2.16479
		2.16647
		2.16773
		2.17357
		2.17517
		2.17995
		2.1804
		2.18133
		2.18154
		2.18199
		2.18291
		2.18347
		2.18373
		2.18692
		2.18698
		2.18713
		2.18823
		2.18945
		2.19251
		2.19498
		2.19503
		2.19592
		2.19699
		2.19887
		2.19995
		2.20465
		2.20485
		2.20707
		2.20756
		2.2103
		2.21156
		2.21442
		2.21495
		2.21509
		2.21715
		2.21737
		2.22119
		2.22178
		2.22491
		2.22591
		2.22828
		2.22833
		2.22867
		2.22869
		2.2292
		2.23055
		2.23093
		2.23236
		2.2356
		2.23891
		2.2395
		2.24285
		2.24529
		2.24855
		2.24936
		2.25001
		2.2511
		2.2514
		2.25178
		2.25247
		2.25474
		2.25645
		2.25824
		2.2584
		2.25858
		2.25863
		2.26168
		2.26616
		2.26798
		2.26996
		2.27051
		2.27071
		2.27235
		2.2735
		2.27351
		2.27376
		2.27516
		2.27598
		2.27707
		2.27899
		2.27946
		2.28333
		2.287
		2.28752
		2.28983
		2.29042
		2.29322
		2.29416
		2.29453
		2.29523
		2.29544
		2.29786
		2.29858
		2.30029
		2.30167
		2.30185
		2.3029
		2.30816
		2.30833
		2.30926
		2.30944
		2.31048
		2.31082
		2.31179
		2.31206
		2.3177
		2.32151
		2.32903
		2.32906
		2.33
		2.3312
		2.33188
		2.33192
		2.33401
		2.33438
		2.33644
		2.33745
		2.33868
		2.34099
		2.34645
		2.34914
		2.35043
		2.35195
		2.35282
		2.36178
		2.36391
		2.36401
		2.36641
		2.36726
		2.36777
		2.36823
		2.37552
		2.3756
		2.3764
		2.37887
		2.38002
		2.38138
		2.3828
		2.38331
		2.38438
		2.38453
		2.38625
		2.38834
		2.3891
		2.38915
		2.39048
		2.39257
		2.39342
		2.39423
		2.40321
		2.40465
		2.40745
		2.41286
		2.41307
		2.41515
		2.41663
		2.42044
		2.42113
		2.422
		2.42231
		2.42452
		2.42534
		2.42608
		2.42773
		2.43333
		2.43336
		2.43366
		2.4375
		2.44115
		2.44208
		2.44457
		2.44526
		2.44616
		2.44809
		2.45118
		2.46056
		2.46176
		2.46185
		2.46746
		2.4684
		2.46894
		2.47063
		2.47119
		2.47321
		2.47414
		2.47666
		2.47789
		2.47948
		2.48381
		2.48409
		2.485
		2.48542
		2.48595
		2.48718
		2.48833
		2.49003
		2.49344
		2.49461
		2.49641
		2.50437
		2.50668
		2.50768
		2.51003
		2.51025
		2.51278
		2.51281
		2.51345
		2.51624
		2.51634
		2.5183
		2.5188
		2.51963
[truncated: 399 more rows]

## Sheet: Figure 2C
DMSO	HF	BtdCPU	0357	3610
0.568283	0.895574	0.411162	1.09297	0.867489
0.578557	0.903566	0.433761	1.12802	0.941853
0.588227	0.9268	0.441316	1.14768	0.960614
0.639419	1.01579	0.455013	1.14777	1.01654
0.644651	1.01768	0.456313	1.17946	1.148
0.64611	1.10437	0.458639	1.19594	1.15281
0.646473	1.13167	0.459345	1.19809	1.22525
0.655409	1.13497	0.460216	1.20502	1.23218
0.657079	1.13542	0.461074	1.2149	1.23492
0.664279	1.16047	0.461642	1.24312	1.26503
0.665754	1.21264	0.461891	1.25313	1.2749
0.676992	1.21651	0.463432	1.25905	1.28442
0.683103	1.21764	0.464226	1.2625	1.29671
0.690426	1.22195	0.464577	1.26541	1.32891
0.691601	1.22409	0.465492	1.26622	1.34349
0.691923	1.23471	0.46574	1.26636	1.34487
0.70485	1.2437	0.465995	1.26674	1.34589
0.707246	1.24378	0.466626	1.27051	1.36563
0.708766	1.24741	0.467461	1.27852	1.37442
0.715642	1.27158	0.467626	1.28175	1.37507
0.720619	1.31218	0.467978	1.28689	1.37998
0.724335	1.31746	0.468443	1.29895	1.39157
0.726711	1.33458	0.468655	1.30729	1.39953
0.732367	1.34044	0.46896	1.31443	1.40665
0.734297	1.36362	0.468963	1.32148	1.40984
0.735213	1.37462	0.46945	1.34573	1.43179
0.736446	1.38665	0.469597	1.34974	1.43423
0.736641	1.39361	0.469789	1.37023	1.43961
0.737356	1.40063	0.470209	1.37363	1.44614
0.739163	1.41825	0.470479	1.37768	1.45322
0.73963	1.433	0.470527	1.39496	1.46187
0.739824	1.43851	0.470735	1.39845	1.47805
0.744302	1.46288	0.470953	1.40076	1.47885
0.744384	1.46556	0.471285	1.40187	1.48038
0.745624	1.47037	0.471645	1.40512	1.48102
0.746099	1.47079	0.472067	1.45279	1.48114
0.750183	1.4832	0.472117	1.45309	1.49476
0.750241	1.49614	0.47254	1.45628	1.506
0.750597	1.50459	0.472944	1.45962	1.51954
0.755938	1.51854	0.472964	1.46431	1.52047
0.756533	1.52323	0.474279	1.47267	1.53056
0.757131	1.52828	0.47562	1.48268	1.54266
0.758185	1.53398	0.475826	1.48557	1.54575
0.759477	1.54386	0.475898	1.4905	1.54587
0.7653	1.55155	0.476305	1.49227	1.55276
0.766279	1.56414	0.476921	1.49578	1.55986
0.770429	1.57242	0.477675	1.5066	1.56035
0.770946	1.57489	0.477682	1.51743	1.56182
0.77096	1.60099	0.478125	1.52992	1.56407
0.772249	1.6055	0.478804	1.54353	1.56638
0.775715	1.60607	0.479795	1.54654	1.56872
0.778046	1.61276	0.480118	1.54828	1.57689
0.778067	1.63078	0.480196	1.56065	1.58028
0.779082	1.63105	0.480957	1.58759	1.58335
0.781963	1.63815	0.481007	1.58998	1.58358
0.78217	1.64	0.481944	1.59216	1.59062
0.7844	1.66193	0.483897	1.60131	1.5987
0.787698	1.66381	0.484048	1.60787	1.59947
0.788252	1.67611	0.484491	1.61248	1.61475
0.791615	1.67827	0.485018	1.6328	1.61984
0.795403	1.68335	0.48548	1.64648	1.62523
0.795569	1.69198	0.485514	1.65291	1.62664
0.796809	1.69627	0.485786	1.67493	1.62834
0.797364	1.69892	0.485796	1.67667	1.64004
0.79912	1.70412	0.48695	1.68319	1.64441
0.799911	1.71414	0.487121	1.69505	1.6497
0.800174	1.79026	0.48815	1.70916	1.65531
0.800241	1.81329	0.488261	1.70991	1.65965
0.802077	1.81796	0.488348	1.70992	1.66595
0.804302	1.81821	0.488534	1.71328	1.67147
0.804969	1.83866	0.489404	1.72325	1.67715
0.805866	1.84079	0.490733	1.72367	1.68213
0.807912	1.84855	0.490799	1.72557	1.68525
0.810176	1.8889	0.491528	1.72596	1.6874
0.811664	1.91608	0.49156	1.72816	1.69111
0.811838	1.91756	0.491598	1.72973	1.69211
0.811989	1.93557	0.491941	1.73139	1.6965
0.81227	1.93587	0.492264	1.73772	1.69991
0.812851	1.95838	0.492346	1.74679	1.7208
0.81403	1.9723	0.492764	1.75028	1.7227
0.815461	1.97585	0.492936	1.7506	1.72322
0.816889	1.97785	0.492948	1.75456	1.72342
0.818184	1.99809	0.493121	1.76609	1.7242
0.820979	2.01268	0.494112	1.79598	1.73415
0.822637	2.03254	0.494354	1.79768	1.73598
0.824172	2.0362	0.494572	1.8056	1.73642
0.825328	2.03655	0.495715	1.80703	1.73953
0.826853	2.0508	0.495804	1.80887	1.74429
0.827883	2.05663	0.496203	1.81371	1.75902
0.828767	2.06585	0.496234	1.82146	1.75968
0.828868	2.0809	0.496327	1.82158	1.76486
0.829562	2.0917	0.49655	1.83	1.76826
0.831061	2.09438	0.496582	1.84121	1.76992
0.832528	2.10125	0.496781	1.84218	1.78302
0.833377	2.10189	0.496804	1.84618	1.78681
0.834195	2.12959	0.498005	1.85692	1.79048
0.834278	2.13069	0.498051	1.86944	1.79713
0.836777	2.13434	0.498089	1.87944	1.80237
0.836925	2.13488	0.499306	1.8796	1.80764
0.840131	2.15061	0.49942	1.90037	1.813
0.840621	2.15737	0.499469	1.90259	1.82002
0.843058	2.16071	0.500037	1.91734	1.82166
0.843081	2.16193	0.500633	1.92753	1.82941
0.843102	2.16765	0.502992	1.93708	1.83244
0.844711	2.17217	0.503812	1.94599	1.83686
0.844842	2.17423	0.503968	1.95084	1.8407
0.853548	2.19497	0.503977	1.95202	1.8407
0.853764	2.19594	0.504977	1.96557	1.84788
0.854681	2.21835	0.505139	1.96588	1.84805
0.855125	2.23185	0.505231	1.97744	1.87356
0.855529	2.23434	0.505408	1.98878	1.87648
0.857624	2.23986	0.505918	2.00625	1.8804
0.858112	2.24258	0.506035	2.00973	1.88134
0.861498	2.24276	0.50615	2.01235	1.88527
0.861498	2.25132	0.506576	2.02871	1.88533
0.863775	2.25426	0.506893	2.04143	1.88654
0.864503	2.27219	0.507849	2.049	1.89903
0.867478	2.27382	0.508618	2.05372	1.90215
0.867948	2.28552	0.508856	2.05633	1.90332
0.869687	2.28802	0.508921	2.07055	1.90665
0.870519	2.30139	0.509765	2.09468	1.9103
0.871948	2.33191	0.510529	2.09504	1.91204
0.871989	2.34107	0.510559	2.09968	1.91512
0.872684	2.34233	0.511822	2.10341	1.91711
0.876752	2.34716	0.512101	2.10912	1.92087
0.877816	2.35241	0.512236	2.11906	1.92998
0.878297	2.35802	0.512376	2.1205	1.93272
0.881019	2.37217	0.512386	2.13031	1.93503
0.881597	2.37953	0.513078	2.13283	1.93772
0.88181	2.38317	0.513341	2.14442	1.93955
0.882274	2.38515	0.513363	2.15762	1.94087
0.886986	2.40103	0.515534	2.17213	1.94235
0.887964	2.41185	0.515992	2.18291	1.95105
0.888938	2.41291	0.51633	2.18409	1.9668
0.888954	2.42801	0.516569	2.1874	1.96727
0.890264	2.43708	0.516827	2.19513	1.97162
0.890888	2.44326	0.516878	2.19748	1.97228
0.894459	2.44794	0.517329	2.21124	1.97348
0.895844	2.46657	0.51777	2.21421	1.97354
0.896301	2.46814	0.518366	2.21619	1.99657
0.89808	2.48331	0.518437	2.23188	2.02831
0.898824	2.51666	0.51845	2.24333	2.02851
0.900822	2.52163	0.518647	2.25695	2.02943
0.902136	2.52308	0.518693	2.2658	2.03008
0.903787	2.52753	0.519065	2.26966	2.04058
0.905833	2.54776	0.52058	2.28263	2.07219
0.906425	2.56058	0.520734	2.28983	2.08276
0.906472	2.58172	0.520778	2.29442	2.08407
0.906576	2.58651	0.522229	2.33007	2.0905
0.907967	2.59098	0.52308	2.33507	2.09534
0.908434	2.59443	0.523099	2.34037	2.09933
0.911799	2.61108	0.523147	2.3438	2.11883
0.912837	2.62122	0.523377	2.34621	2.11897
0.913924	2.63847	0.523629	2.378	2.13913
0.914419	2.65517	0.525787	2.37981	2.14182
0.917494	2.66833	0.52696	2.38348	2.14455
0.917764	2.67118	0.526989	2.40156	2.14486
0.918546	2.69137	0.527173	2.4084	2.156
0.918831	2.73969	0.527208	2.4323	2.16225
0.923902	2.7591	0.527402	2.45176	2.17368
0.924329	2.7742	0.528013	2.45229	2.17456
0.924753	2.77529	0.528112	2.45811	2.19
0.925262	2.78685	0.528253	2.48127	2.19237
0.927472	2.83024	0.528316	2.48483	2.19716
0.927592	2.83338	0.529146	2.48797	2.19745
0.927802	2.84357	0.52924	2.49348	2.19893
0.929086	2.85493	0.529499	2.49379	2.20727
0.929136	2.8605	0.529656	2.51283	2.2148
0.929426	2.87059	0.529681	2.52711	2.22481
0.929664	2.90733	0.530194	2.52934	2.23116
0.931424	2.90977	0.530416	2.53244	2.2417
0.932294	2.91054	0.530426	2.56185	2.24577
0.932419	2.91884	0.530554	2.56746	2.25169
0.934761	2.92176	0.532075	2.57085	2.25982
0.936505	2.92295	0.532232	2.5876	2.27966
0.937731	2.92336	0.532886	2.59552	2.28531
0.938206	2.92957	0.534352	2.60383	2.30706
0.940143	2.96044	0.534894	2.61506	2.31031
0.942475	2.96101	0.535178	2.6278	2.3106
0.942896	2.96792	0.535204	2.64817	2.31166
0.945412	2.97205	0.535297	2.69114	2.32173
0.946608	2.98519	0.53544	2.69282	2.32797
0.947696	2.99277	0.536219	2.6946	2.34409
0.947816	3.01214	0.536491	2.73514	2.35559
0.947926	3.02546	0.536592	2.73903	2.36333
0.948682	3.04035	0.53695	2.74702	2.38146
0.948909	3.04662	0.537045	2.74755	2.38698
0.94903	3.05338	0.537181	2.76296	2.40722
0.950021	3.05907	0.538308	2.76363	2.41176
0.950073	3.11318	0.538565	2.77075	2.42217
0.950204	3.14311	0.53877	2.80085	2.42464
0.950372	3.15409	0.538978	2.81622	2.43114
0.951005	3.16295	0.540772	2.82005	2.44628
0.951334	3.22149	0.541154	2.9173	2.45294
0.951671	3.22208	0.543636	2.93035	2.45756
0.952672	3.22983	0.545275	2.94381	2.4576
0.955845	3.23692	0.545746	2.95495	2.50986
0.956025	3.24075	0.545844	2.96916	2.51354
0.958099	3.25043	0.546275	2.97089	2.51604
0.959789	3.26838	0.546791	2.99268	2.53664
0.960983	3.31484	0.547811	2.99675	2.53794
0.96477	3.37795	0.547887	3.00397	2.55271
0.965228	3.38142	0.548497	3.00443	2.55467
0.967528	3.3843	0.548555	3.02142	2.5609
0.96909	3.42673	0.548715	3.03016	2.57454
0.969099	3.46652	0.549674	3.03818	2.60223
0.969183	3.48603	0.549803	3.0407	2.61303
0.969706	3.50448	0.550178	3.05068	2.62138
0.972087	3.52107	0.5504	3.05395	2.65754
0.972743	3.53539	0.550453	3.05448	2.66605
0.974062	3.54399	0.550734	3.06159	2.67206
0.975563	3.59944	0.551062	3.0634	2.67502
0.97636	3.62172	0.551276	3.06618	2.71166
0.976982	3.63629	0.551751	3.0793	2.71519
0.978521	3.6892	0.552034	3.08992	2.74286
0.980775	3.69461	0.552332	3.09177	2.75015
0.982708	3.7169	0.55234	3.09416	2.76024
0.983619	3.75768	0.552497	3.13662	2.76415
0.985797	3.77204	0.554076	3.14854	2.76967
0.98888	3.7798	0.554094	3.15262	2.79642
0.989255	3.78927	0.555582	3.15526	2.79773
0.989586	3.84315	0.555691	3.17763	2.8041
0.989744	3.84841	0.555871	3.19335	2.81327
0.989852	3.86321	0.555998	3.23632	2.8214
0.990931	3.88208	0.5563	3.24656	2.84524
0.991612	3.96398	0.556467	3.28319	2.85472
0.992067	3.96416	0.556742	3.31142	2.88731
0.996329	4.07244	0.559708	3.34588	2.91405
0.998974	4.10369	0.560045	3.34666	2.91872
1.00166	4.18784	0.560383	3.36163	2.93067
1.00684	4.21857	0.561626	3.3674	2.94094
1.00704	4.23949	0.561743	3.37987	2.9505
1.00796	4.41533	0.562088	3.52103	2.95488
1.0084	4.42234	0.563183	3.52354	2.95602
1.00866	4.43424	0.564125	3.58301	2.97026
1.00895	4.49965	0.565882	3.58465	2.97696
1.00982	4.5069	0.566102	3.58911	2.97803
1.01017	4.55784	0.566819	3.6067	3.00665
1.0113	4.63677	0.566953	3.61189	3.01276
1.01175	4.63838	0.567565	3.66452	3.02493
1.01412	4.64068	0.567765	3.68857	3.0294
1.01457	4.65252	0.567965	3.68911	3.05145
1.01551	4.65588	0.568834	3.71217	3.05191
1.0156	4.7046	0.569472	3.71815	3.05396
1.01589	4.70902	0.570628	3.74799	3.06755
1.01636	4.71192	0.570706	3.77722	3.07925
1.01664	4.71207	0.570714	3.79084	3.08902
1.01709	4.72476	0.570719	3.85056	3.09202
1.01963	4.7711	0.571837	3.88201	3.10481
1.02145	4.80866	0.572168	3.90059	3.10755
1.02263	4.81933	0.572628	3.90858	3.10809
1.024	4.87415	0.572663	3.93079	3.11521
1.02504	5.0646	0.572874	3.9762	3.11663
1.02669	5.12514	0.573107	3.98888	3.12646
1.03056	5.14782	0.573455	4.0055	3.13207
1.03161	5.21355	0.573641	4.01631	3.14594
1.03244	5.25783	0.57377	4.04216	3.15797
1.03321	5.32285	0.574021	4.07247	3.17524
1.03332	5.39137	0.57456	4.17085	3.18413
1.03465	5.51053	0.574636	4.19432	3.21212
1.03546	5.55881	0.57532	4.2084	3.23625
1.03647	5.68192	0.575655	4.21427	3.27288
1.03679	5.69422	0.57575	4.24318	3.28181
1.04144	5.81363	0.575765	4.27925	3.29965
1.04191	5.86853	0.575989	4.35461	3.30187
1.04653	5.89657	0.576054	4.36402	3.33038
1.04653	5.91189	0.577399	4.41513	3.34551
1.04712	6.01875	0.577677	4.4305	3.35567
1.0482	6.10501	0.577812	4.48582	3.40156
1.04822	6.1703	0.578402	4.51468	3.41738
1.0492	6.27539	0.578407	4.52141	3.42128
1.04943	6.29074	0.578488	4.5454	3.42268
1.05243	6.41456	0.57865	4.58861	3.43716
1.05337	6.60988	0.579019	4.64442	3.43823
1.05399	6.71777	0.579389	4.68062	3.44293
1.05593	6.76414	0.580264	4.70511	3.47238
1.05638	6.79661	0.580597	4.8404	3.48395
1.05745	6.84206	0.581051	4.8727	3.52641
1.05805	7.00908	0.581273	4.89427	3.5285
1.0601	7.03835	0.581623	4.89521	3.58854
1.06095	7.24323	0.58177	4.96349	3.59521
1.06098	7.26911	0.582307	4.99126	3.6036
1.06173	7.31483	0.582416	5.09471	3.60895
1.06384	7.37577	0.582422	5.16999	3.6397
1.06393	7.4116	0.583405	5.19489	3.70219
1.06395	7.45343	0.583468	5.32578	3.79011
1.06554	7.49612	0.584032	5.36896	3.79546
1.06666	7.51514	0.584125	5.54885	3.81671
1.06667	7.54493	0.584684	5.60959	3.87792
1.06672	7.69338	0.584728	5.61727	3.88647
1.06762	7.71325	0.586091	5.63122	3.89329
1.06996	7.72882	0.586429	5.66984	3.9306
1.07145	7.76297	0.587116	5.69075	3.94161
1.07184	7.77848	0.587142	5.69465	3.94345
1.07287	7.79098	0.587439	5.70383	3.9546
1.07307	7.82655	0.587899	5.70468	4.03847
1.07324	7.9635	0.589462	5.70571	4.04774
1.07372	7.96891	0.589481	5.72182	4.07165
1.07381	8.09692	0.589947	6.11366	4.07919
1.07422	8.14352	0.590175	6.34466	4.16241
1.07632	8.15185	0.590261	6.53118	4.1675
1.07671	8.21746	0.59062	6.64655	4.18323
1.07837	8.49994	0.590836	6.6559	4.21476
1.08101	8.54536	0.591211	6.77686	4.24339
1.08126	8.58795	0.59181	6.82615	4.25065
1.08204	8.74156	0.593856	7.05224	4.25114
1.08243	8.87139	0.593864	7.05988	4.26688
1.0834	9.30743	0.59395	7.09581	4.40752
1.08378	9.33384	0.594406	7.17967	4.41583
1.08573	9.3789	0.594438	7.25884	4.43404
1.08746	9.38637	0.594448		4.45653
1.08897	9.45107	0.595133		4.50281
1.0896	9.51789	0.595243		4.58513
1.09028	9.73289	0.595982		4.6308
1.09215	9.75071	0.596192		4.63593
1.09398	9.85908	0.596408		4.74597
1.09442	10.0354	0.596469		4.76492
1.09445	10.1213	0.597205		4.76923
1.09449	10.2416	0.597298		4.77975
1.09495	10.308	0.598012		4.82079
1.09522	10.6413	0.598179		4.8764
1.09916	10.6935	0.598193		4.89899
1.10072	11.5914	0.598721		4.99339
1.10107		0.598735		5.0053
1.10386		0.599043		5.02432
1.10501		0.599529		5.04876
1.1052		0.599921		5.09668
1.10536		0.601086		5.09854
1.10583		0.60111		5.11707
1.10598		0.60111		5.18878
1.10765		0.601592		5.21083
1.10847		0.602306		5.24746
1.10881		0.602478		5.39096
1.11006		0.603143		5.47289
1.11061		0.603884		5.53429
1.11076		0.603901		5.62112
1.11127		0.604423		5.62136
1.11228		0.604512		5.64676
1.11334		0.604996		5.6482
1.11426		0.605847		5.67416
1.11522		0.605951		5.71305
1.11543		0.605982		5.8046
1.11741		0.606214		5.83948
1.11967		0.607028		5.8733
1.12082		0.60704		5.92654
1.12271		0.607107		5.95305
1.1241		0.607655		5.96344
1.12558		0.608018		6.07937
1.12685		0.608363		6.1267
1.12797		0.608809		6.16562
1.12829		0.609091		6.25764
1.12987		0.609917		6.46892
1.13092		0.610398		6.50701
1.13096		0.61101		6.55298
1.13166		0.611302		6.71107
1.1348		0.6116		6.79565
1.13606		0.611945		6.82584
1.1362		0.612117		6.82772
1.13626		0.612208		7.1549
1.13629		0.612332		7.33543
1.13813		0.612808		7.36977
1.14242		0.613025		7.39455
1.14276		0.613093		7.48776
1.14373		0.613126		7.521
1.14397		0.613214		7.67817
1.1447		0.614327		7.78233
1.14506		0.614838		7.84444
1.1454		0.614843
1.14582		0.615278
1.14636		0.615588
1.14718		0.616119
1.14731		0.616124
1.14737		0.616783
1.14827		0.616806
1.14892		0.617302
1.1513		0.61738
1.15172		0.617544
1.15284		0.618373
1.15469		0.618409
1.15509		0.618727
1.15524		0.618913
1.15526		0.619063
1.15741		0.619144
1.15937		0.619155
1.15941		0.619202
1.16058		0.619338
1.16103		0.619606
1.16129		0.619911
1.1628		0.620305
1.16388		0.620978
1.1639		0.622577
1.16462		0.623255
1.1648		0.623755
1.16482		0.623827
1.16555		0.625628
1.16765		0.626448
1.16945		0.626657
1.16996		0.627438
1.17146		0.62786
1.17167		0.628315
1.17239		0.628761
1.17258		0.628818
1.17274		0.629305
1.17297		0.629501
1.17354		0.629672
1.17412		0.629829
1.17601		0.630803
1.17797		0.630897
1.1782		0.632001
1.17888		0.632441
1.17919		0.632676
1.18066		0.633317
1.18133		0.633761
1.18287		0.633773
1.18364		0.634163
1.18452		0.634196
1.18503		0.635524
1.18518		0.636194
1.18568		0.636763
1.18594		0.637214
1.18597		0.637303
1.18603		0.637377
1.18787		0.637579
1.18822		0.637903
1.18905		0.63837
1.18939		0.638627
1.18946		0.638704
1.18965		0.638964
1.19015		0.639181
1.19162		0.639799
1.19313		0.640028
1.19355		0.640206
1.19491		0.640209
1.19739		0.64027
1.19752		0.640525
1.19766		0.640986
1.20003		0.641231
1.20121		0.642576
1.20218		0.642676
1.20374		0.643862
1.20433		0.643903
1.20488		0.643933
1.2053		0.644139
1.20833		0.644146
1.20999		0.644173
1.21001		0.645713
1.21003		0.646201
1.21038		0.647164
1.21147		0.647447
1.21254		0.647548
1.21287		0.647744
1.2131		0.647927
1.21324		0.648188
1.2153		0.648265
1.21943		0.648283
1.21961		0.648911
1.22089		0.649066
1.2213		0.64941
1.22148		0.649425
1.22217		0.649572
1.2226		0.650316
1.22272		0.651181
1.22387		0.651476
1.22732		0.651877
1.22763		0.651905
1.22795		0.651959
1.22897		0.652185
1.23418		0.652342
1.23454		0.652946
1.23521		0.653308
1.23522		0.653947
1.23532		0.653991
1.23693		0.654679
1.23806		0.654682
1.23867		0.655138
1.23952		0.655689
1.24131		0.655832
1.24131		0.656329
1.24312		0.657323
1.24574		0.65755
1.24608		0.659757
1.24813		0.659796
1.24895		0.660529
1.24988		0.660709
1.25006		0.660796
1.25173		0.661358
1.2524		0.661438
1.25371		0.661474
1.25478		0.661518
1.25565		0.662279
1.25572		0.662544
1.25653		0.662577
1.25732		0.662582
1.25796		0.662764
1.26003		0.662824
1.26025		0.663019
1.26031		0.663027
1.26198		0.663305
1.26377		0.664654
1.26453		0.665145
1.26529		0.665174
1.26872		0.665532
1.26924		0.66589
1.26995		0.666005
1.27555		0.666165
1.27977		0.666376
1.28372		0.666849
1.2843		0.666928
1.28579		0.667189
1.28654		0.667401
1.28825		0.667682
1.29042		0.667684
1.2907		0.667754
1.29144		0.667769
1.29322		0.668008
1.29362		0.668037
1.29677		0.668487
1.29785		0.668536
1.29802		0.668663
1.29822		0.668992
1.2992		0.669161
1.29988		0.669795
1.30144		0.6699
1.30148		0.670529
1.30205		0.671005
1.30383		0.671094
1.30527		0.671391
1.30696		0.671401
1.30711		0.671518
1.30782		0.671647
1.31009		0.671738
1.31011		0.672182
1.31142		0.672223
1.31256		0.672705
1.31545		0.673017
1.31653		0.673588
1.31774		0.674047
1.31977		0.674308
1.3198		0.674318
1.32163		0.674883
1.32323		0.674991
1.32405		0.675419
1.3242		0.675452
1.32427		0.675631
1.32455		0.676145
1.32489		0.676581
1.32604		0.676867
1.32625		0.676995
1.32822		0.677184
1.33174		0.677632
1.33289		0.677706
1.33304		0.678009
1.33401		0.678913
1.33497		0.679006
1.33566		0.679895
1.34102		0.6799
1.34161		0.680644
1.34166		0.680731
1.34189		0.68111
1.34265		0.681255
1.34298		0.681531
1.34532		0.681598
1.34639		0.681848
1.3468		0.681891
1.34704		0.681947
1.34736		0.682098
1.34739		0.682781
1.34861		0.682872
1.3508		0.682893
1.35117		0.683007
1.3533		0.683147
1.35356		0.68345
1.35654		0.683689
1.35681		0.683752
1.36032		0.683951
1.36075		0.684423
1.3608		0.684524
1.36142		0.684687
1.36152		0.685669
1.36207		0.685769
1.36641		0.685967
1.36724		0.686104
1.36869		0.686276
1.36912		0.686324
1.36938		0.686401
1.36991		0.686971
1.37051		0.687434
1.3706		0.687533
1.3713		0.687924
1.37132		0.688412
1.37165		0.688713
1.3722		0.68874
1.3739		0.688782
1.37401		0.689241
1.37416		0.689402
1.37434		0.689516
1.37454		0.689936
1.37483		0.689983
1.37663		0.690099
1.37785		0.690135
1.37904		0.690845
1.37933		0.691718
1.38032		0.692205
1.3824		0.692318
1.38367		0.692426
1.38529		0.692434
1.38567		0.692618
1.38743		0.693253
1.38798		0.693445
1.39248		0.693682
1.39321		0.693896
1.39369		0.694026
1.39471		0.694279
1.39498		0.694391
1.40289		0.694581
1.40351		0.694742
1.40415		0.695046
1.40438		0.695047
1.40503		0.695251
1.40554		0.695444
1.40725		0.695755
1.40738		0.695917
1.40766		0.696563
1.40821		0.696918
1.4089		0.696946
1.41215		0.697295
1.41771		0.697424
1.41797		0.697698
1.41979		0.698257
1.42106		0.698285
1.42216		0.698478
1.42283		0.698743
1.42363		0.698855
1.42824		0.699283
1.43027		0.699353
1.43118		0.699612
1.43413		0.699665
1.43736		0.699709
1.44004		0.700096
1.44277		0.700554
1.44478		0.700708
1.44484		0.700761
1.44488		0.701364
1.44568		0.701474
1.44624		0.70188
1.44659		0.702275
1.44712		0.703137
1.44738		0.703654
1.44989		0.704206
1.45059		0.704369
1.45202		0.704626
1.45291		0.704924
1.45433		0.704933
1.45523		0.705114
1.46307		0.705143
1.46423		0.705378
1.46433		0.70598
1.46522		0.706771
1.46677		0.706843
1.46739		0.70724
1.4681		0.707712
1.46941		0.70781
1.47354		0.707831
1.47389		0.708168
1.47411		0.70839
1.4777		0.70866
1.47996		0.708968
1.48008		0.709258
1.48035		0.709646
1.48279		0.709946
1.48362		0.710494
1.48418		0.710692
1.48473		0.710799
1.48634		0.71088
1.48797		0.711378
1.49		0.711792
1.4907		0.712129
1.491		0.712132
1.4921		0.712384
1.49262		0.712839
1.49406		0.712889
1.49513		0.71448
1.49556		0.714543
1.49709		0.715052
1.4972		0.71528
1.49731		0.715315
1.49753		0.715817
1.49786		0.715829
1.50103		0.715948
1.50146		0.716758
1.50194		0.716982
1.50435		0.717335
1.50834		0.717375
1.5126		0.717708
1.51374		0.717832
1.51412		0.718416
1.51721		0.718602
1.51734		0.719427
1.51901		0.719588
1.51999		0.720029
1.52169		0.72017
1.52185		0.720363
1.52197		0.720855
1.52433		0.720925
1.52657		0.720977
1.52666		0.721116
1.52996		0.72159
1.53254		0.722008
1.53351		0.722161
1.53901		0.722243
1.54505		0.722328
1.54535		0.722757
1.54559		0.723852
1.54586		0.723908
1.54669		0.724
1.54783		0.724515
1.54785		0.724876
1.55068		0.724905
1.55185		0.72527
1.55268		0.725337
1.55284		0.725762
1.55432		0.725789
1.55575		0.726133
1.55912		0.726509
1.56076		0.726514
1.56382		0.726919
1.56574		0.727054
1.56576		0.727634
1.56802		0.727695
1.56841		0.727839
1.57305		0.727848
1.57436		0.727989
1.57511		0.7289
1.57583		0.729558
1.57765		0.72976
1.57854		0.729846
1.58047		0.730182
1.58273		0.730787
1.58289		0.730959
1.58583		0.731265
1.58712		0.731317
1.58738		0.73175
1.58913		0.732641
1.59906		0.733106
1.60133		0.733219
1.60421		0.733288
1.60484		0.733392
1.60763		0.734213
1.60793		0.73462
1.60902		0.735111
1.60907		0.735539
1.61002		0.736138
1.61007		0.737546
1.61015		0.73794
1.61117		0.738128
1.6125		0.738202
1.61262		0.738786
1.61406		0.738921
1.61434		0.739644
1.62024		0.739959
1.624		0.740174
1.62439		0.740618
1.62649		0.740859
1.62786		0.741
1.62809		0.741055
1.63122		0.741087
1.63157		0.741101
1.63562		0.741321
1.63595		0.741489
1.63821		0.741549
1.63978		0.741589
1.64602		0.741704
1.64768		0.741887
1.65098		0.741973
1.65247		0.742252
1.65277		0.742266
1.65289		0.742891
1.65526		0.743014
1.65942		0.743824
1.65983		0.743867
1.66144		0.743903
1.66321		0.74431
1.66506		0.744677
1.66689		0.744828
1.66724		0.745103
1.67123		0.745256
1.67224		0.745333
1.67305		0.745522
1.67539		0.745724
1.67569		0.745831
1.67857		0.746338
1.68354		0.746848
1.68373		0.747121
1.68688		0.747218
1.6877		0.747251
1.69344		0.747958
1.69373		0.747978
1.69573		0.748281
1.69645		0.748363
1.69661		0.748605
1.6996		0.748795
1.70055		0.749025
1.70396		0.749089
1.70671		0.74971
1.70818		0.749779
1.70823		0.750301
1.70912		0.750453
1.70938		0.750642
1.70999		0.750797
1.71153		0.751802
1.71203		0.751988
1.71295		0.752325
1.71542		0.752378
1.71664		0.752429
1.7176		0.752558
1.72067		0.752874
1.72137		0.753041
1.72304		0.753794
1.72308		0.754352
1.72698		0.754507
1.72718		0.754616
1.72836		0.754677
1.73138		0.755235
1.73212		0.755316
1.73541		0.756024
1.73929		0.756371
1.73983		0.756585
1.74106		0.757555
1.74257		0.757661
1.74466		0.757717
1.74538		0.758222
1.74802		0.758831
1.7518		0.759855
1.75193		0.759918
1.75372		0.759928
1.75442		0.760277
1.75854		0.760802
1.7651		0.761099
1.76808		0.762747
1.76846		0.762914
1.76964		0.763581
1.77002		0.763929
1.77099		0.764669
1.77147		0.765002
1.77366		0.765167
1.77502		0.765276
1.77982		0.765364
1.78063		0.765559
1.78065		0.765701
1.78369		0.7676
1.79185		0.767713
1.79633		0.76784
1.79706		0.767931
1.79926		0.768911
1.79973		0.769415
1.80659		0.769558
1.81319		0.769779
1.8147		0.769988
1.81545		0.770148
1.81684		0.770651
1.81904		0.770796
1.81943		0.771478
1.81956		0.772827
1.82212		0.773363
1.82344		0.773967
1.82441		0.774068
1.8251		0.774431
1.82724		0.775697
1.82727		0.775699
1.83225		0.776027
1.83237		0.776257
1.8325		0.776561
1.83375		0.777209
1.83477		0.777225
1.83557		0.777672
1.83644		0.777995
1.83669		0.778098
1.8381		0.778206
1.84001		0.778335
1.8404		0.778391
1.84081		0.778407
1.84428		0.778783
1.85354		0.779929
1.85515		0.780153
1.86329		0.780566
1.86593		0.78081
1.87958		0.780955
1.88186		0.781028
1.88203		0.781188
1.88459		0.781878
1.88468		0.782282
1.88627		0.782832
1.88856		0.783254
1.89039		0.783265
1.89298		0.784145
1.8937		0.784374
1.89496		0.78491
1.89826		0.78497
1.89883		0.785774
1.90172		0.786037
1.90211		0.786157
1.9063		0.786393
1.91187		0.786974
1.91236		0.787255
1.91282		0.787415
1.91397		0.787468
1.91523		0.787501
1.91932		0.787648
1.91994		0.788231
1.92056		0.788278
1.92173		0.788575
1.922		0.789041
1.92321		0.789215
1.92538		0.789225
1.93046		0.79015
1.93119		0.790248
1.93215		0.790253
1.93401		0.790863
1.93925		0.79107
1.9456		0.791118
1.94778		0.79114
1.94782		0.791268
1.95418		0.791532
1.9565		0.791598
1.95713		0.792219
1.9591		0.792243
1.96378		0.792464
1.96684		0.792717
1.97253		0.792841
1.97641		0.792923
1.97878		0.794436
1.97969		0.794447
1.98266		0.795079
1.985		0.795794
1.98552		0.796357
1.98714		0.796589
1.98945		0.796617
1.98967		0.796652
1.99365		0.796951
1.99397		0.797315
1.99929		0.798143
2.00134		0.798655
2.00806		0.79932
2.00853		0.799414
2.01353		0.799777
2.01362		0.800006
2.01517		0.800599
2.02172		0.801707
2.02465		0.801728
2.02633		0.802216
2.02701		0.802442
2.03046		0.803845
2.03094		0.804017
2.03213		0.804312
2.03326		0.804347
2.0339		0.806424
2.03659		0.80656
2.03812		0.806577
2.03826		0.807365
2.03849		0.807711
2.03942		0.808152
2.03996		0.808342
2.04118		0.808715
2.04566		0.80899
2.04863		0.809032
2.04915		0.809111
2.04933		0.809327
2.05103		0.809332
2.05361		0.809603
2.06022		0.809888
2.06182		0.809961
2.06334		0.810309
2.06448		0.810551
2.06507		0.810581
2.06917		0.810669
2.07253		0.810842
2.07271		0.811179
2.07515		0.811414
2.07915		0.811933
2.08009		0.811968
2.08826		0.812432
2.09093		0.812892
2.0919		0.81301
2.09768		0.813117
2.09981		0.813593
2.10099		0.813611
2.10276		0.813696
2.10618		0.81379
2.10713		0.814112
2.10782		0.814215
2.10882		0.814486
2.11185		0.814524
2.11263		0.815155
2.11399		0.815214
2.11417		0.815659
2.11671		0.818211
2.11845		0.818356
2.12182		0.818955
2.12254		0.818991
2.12295		0.819689
2.12437		0.819907
2.12785		0.820195
2.12889		0.821504
2.13117		0.821893
2.13793		0.822144
2.13827		0.822209
2.14214		0.822415
2.14821		0.822571
2.15035		0.822615
2.15284		0.822737
2.15377		0.822864
2.1602		0.823036
2.16121		0.823384
2.16953		0.823915
2.17686		0.823972
2.17694		0.824293
2.17845		0.824497
2.1822		0.824606
2.19068		0.824615
2.1954		0.824628
2.19773		0.82549
2.20187		0.825618
2.20471		0.825621
2.2103		0.825678
2.21041		0.826474
2.21076		0.826784
2.2113		0.826872
2.21625		0.826905
2.22691		0.827582
2.23008		0.827674
2.23178		0.828334
2.23718		0.828366
2.23881		0.828743
2.2415		0.828932
2.24198		0.82895
2.24284		0.829008
2.24311		0.830527
2.25302		0.830762
2.26189		0.831444
2.27433		0.831713
2.27436		0.83196
2.2759		0.832111
2.27815		0.832197
2.27956		0.832466
2.28029		0.832482
2.28915		0.833253
2.28928		0.834355
2.29087		0.834512
2.29359		0.834797
2.29733		0.835459
2.29808		0.835866
2.30082		0.836812
2.30284		0.837361
2.30326		0.837418
2.3089		0.838448
2.30909		0.838483
2.31162		0.839024
2.31656		0.839719
2.31982		0.839845
2.32075		0.840046
2.3309		0.84033
2.33113		0.840526
2.33634		0.841667
2.33851		0.841845
2.3453		0.842091
2.35476		0.842362
2.35511		0.84253
2.35785		0.8426
2.37475		0.842936
2.37976		0.843272
2.38136		0.843323
2.38224		0.843327
2.384		0.843727
2.38921		0.843831
2.39243		0.845474
2.39404		0.846668
2.39443		0.846732
2.39507		0.846803
2.39674		0.847353
2.40058		0.847725
2.4054		0.8481
2.40581		0.848427
2.41726		0.848431
2.41894		0.848752
2.41954		0.849103
2.42231		0.849165
2.42288		0.849186
2.44309		0.849277
2.44642		0.850076
2.45533		0.850367
2.45768		0.850655
2.46253		0.850791
2.4629		0.851043
2.46374		0.851761
2.47053		0.852292
2.48207		0.852805
2.48331		0.853039
2.4836		0.853181
2.4861		0.853357
2.49008		0.854561
2.49152		0.854827
2.49337		0.854969
2.49428		0.8551
2.49751		0.855333
2.50039		0.856035
2.50338		0.85616
2.51269		0.856307
2.51445		0.856413
2.51895		0.856416
2.53088		0.856531
2.53351		0.856941
2.53526		0.857461
2.53612		0.857601
2.53644		0.857999
2.53687		0.85815
2.53832		0.858177
2.5419		0.858798
2.5438		0.859026
2.54471		0.859231
2.54478		0.859506
2.54714		0.859873
2.56493		0.860298
2.56786		0.860487
2.57195		0.861073
2.57555		0.861097
2.57653		0.861397
2.5788		0.861459
2.58015		0.861544
2.58534		0.861753
2.58792		0.862035
2.58985		0.862521
2.59094		0.862833
2.59171		0.863441
2.59487		0.863857
2.60444		0.864555
2.60467		0.865622
2.60612		0.865638
2.61732		0.865964
2.61872		0.866247
2.61958		0.866418
2.63004		0.866936
2.63259		0.867083
2.64545		0.867099
2.64612		0.867322
2.64655		0.867361
2.65248		0.867458
2.65535		0.868467
2.66502		0.869434
2.66579		0.871165
2.66711		0.871951
2.68264		0.872808
2.68819		0.873399
2.68828		0.873751
2.6968		0.873874
2.69758		0.874072
2.70018		0.874518
2.70269		0.874735
2.71361		0.875241
2.71748		0.875527
2.7192		0.876361
2.72096		0.876567
2.7318		0.877621
2.73403		0.877621
2.74798		0.877646
2.76737		0.878235
2.77102		0.878392
2.77333		0.878418
2.77436		0.87873
2.77986		0.878778
2.78076		0.879167
2.78963		0.879659
2.79329		0.879948
2.81002		0.880603
2.81228		0.880861
2.81483		0.880911
2.81761		0.881802
2.82488		0.881818
2.82869		0.881873
2.83335		0.882055
2.83538		0.882996
2.8432		0.883273
2.84959		0.883434
2.85115		0.883785
2.85436		0.8838
2.859		0.885309
2.85952		0.885579
2.8605		0.885919
2.86891		0.886613
2.88362		0.886813
2.8847		0.887372
2.89214		0.887793
2.90705		0.887825
2.90941		0.887922
2.91463		0.888672
2.92036		0.889316
2.92804		0.889779
2.92894		0.889781
2.93409		0.890256
2.93696		0.890275
2.94754		0.891218
2.95218		0.891535
2.95296		0.891659
2.9608		0.891891
2.97185		0.892018
2.97288		0.893381
2.97494		0.893736
2.97939		0.8941
2.98872		0.89485
2.99381		0.895269
2.99383		0.895542
3.00475		0.895841
3.02812		0.896196
3.03262		0.896203
3.03538		0.898643
3.04795		0.899359
3.05111		0.899574
3.05443		0.899594
3.06017		0.899888
3.06251		0.899962
3.0642		0.900206
3.06895		0.901131
3.07015		0.901717
3.07473		0.902042
3.07918		0.902877
3.07941		0.90508
3.08691		0.905331
3.0885		0.90559
3.09019		0.905959
3.09091		0.906311
3.09593		0.907044
3.09807		0.907331
3.10218		0.908112
3.10434		0.9088
3.10476		0.910064
3.10811		0.910076
3.10893		0.91011
3.10982		0.910371
3.11679		0.911379
3.11847		0.911757
3.12143		0.911967
3.12591		0.913155
3.13534		0.913699
3.13922		0.913805
3.14106		0.913826
3.14326		0.91497
3.14608		0.915071
3.15355		0.9158
3.15662		0.916257
3.159		0.91729
3.16678		0.91767
3.17153		0.918002
3.17737		0.918579
3.19497		0.919088
3.19594		0.919259
3.20358		0.919682
3.20996		0.92088
3.21915		0.920962
3.22126		0.921511
3.22287		0.921742
3.23622		0.922541
3.24128		0.922687
3.24751		0.922735
3.25457		0.922753
3.25693		0.922951
3.26107		0.923516
3.26309		0.923731
3.26379		0.925172
3.27082		0.925273
3.29321		0.927448
3.29499		0.927666
3.29631		0.928566
3.30048		0.928623
3.3025		0.929258
3.31436		0.929538
3.31844		0.929756
3.32207		0.929882
3.32426		0.930003
3.32569		0.931301
3.32604		0.931792
3.33733		0.93232
3.34548		0.932428
3.36135		0.932879
3.36683		0.933017
3.36973		0.933078
3.37014		0.933123
3.37033		0.933308
3.38232		0.933534
3.38363		0.934089
3.38809		0.934362
3.39669		0.934398
3.42076		0.934753
3.42563		0.935035
3.42718		0.935121
3.43092		0.935181
3.43211		0.936147
3.436		0.93723
3.43881		0.937247
3.43896		0.937393
3.43918		0.937419
3.43961		0.937537
3.44405		0.937594
3.4474		0.9383
3.4495		0.938408
3.45172		0.93855
3.46649		0.940405
3.48814		0.941273
3.49833		0.942669
3.5083		0.942718
3.51273		0.943007
3.53312		0.943371
3.58529		0.944028
3.59169		0.944057
3.59444		0.944104
3.59644		0.944234
3.60473		0.945337
3.61337		0.945696
3.61409		0.946809
3.63028		0.946831
3.64517		0.947026
3.65594		0.9473
3.65739		0.947605
3.66356		0.948049
3.66553		0.948803
3.66961		0.949171
3.6789		0.949332
3.69555		0.949376
3.69585		0.949444
3.69895		0.950515
3.69963		0.950985
3.70959		0.951994
3.71961		0.952352
3.72541		0.953868
3.73144		0.953881
3.75847		0.954
3.76497		0.954044
3.76641		0.954079
3.77556		0.95513
3.78196		0.956102
3.78754		0.956243
3.80313		0.957411
3.82267		0.958747
3.82292		0.959237
3.83552		0.959893
3.85821		0.960793
3.86053		0.961293
3.87843		0.961842
3.89451		0.961924
3.89551		0.963364
3.89779		0.96379
3.89882		0.964045
3.90986		0.964137
3.92471		0.964389
3.94472		0.964422
3.95273		0.964578
3.9548		0.964654
3.97787		0.964961
3.97847		0.965262
3.99745		0.966165
4.02935		0.966562
4.03063		0.967525
4.03723		0.968534
4.04295		0.968598
4.04405		0.969606
4.04578		0.970554
4.0515		0.970888
4.05191		0.972117
4.08373		0.97323
4.09111		0.97342
4.11056		0.974463
4.11382		0.975091
4.12672		0.977022
4.13721		0.977079
4.1443		0.978379
4.19726		0.978972
4.20729		0.979146
4.21708		0.979263
4.23814		0.980326
4.24205		0.980425
4.25476		0.981273
4.27792		0.981368
4.28277		0.9815
4.28495		0.981555
4.2923		0.981618
4.31534		0.982609
4.34687		0.983986
4.3616		0.98455
4.37459		0.985064
4.37735		0.986299
4.38769		0.986557
4.3981		0.986769
4.40331		0.987116
4.4054		0.987785
4.42326		0.98779
4.42507		0.988292
4.43003		0.988358
4.44646		0.988471
4.44725		0.988471
4.4624		0.98852
4.48389		0.988924
4.49749		0.988994
4.49941		0.989436
4.50264		0.989671
4.5099		0.990027
4.54753		0.990195
4.55617		0.990258
4.59839		0.991045
4.61342		0.992086
4.61421		0.992109
4.63772		0.992316
4.64231		0.992474
4.66985		0.992512
4.68008		0.993657
4.68911		0.994565
4.69349		0.994708
4.69985		0.995996
4.70209		0.996234
4.70725		0.996995
4.70898		0.997292
4.71505		0.997823
4.71889		0.997909
4.71979		0.999736
4.72173		0.999824
4.73168		0.99999
		1.00078
		1.0018
		1.00218
		1.00221
		1.00253
		1.00269
		1.00302
		1.00332
		1.00351
		1.00415
		1.00415
		1.00491
		1.00494
		1.00547
		1.00551
		1.00628
		1.00673
		1.00805
		1.00858
		1.00865
		1.00939
		1.00995
		1.01249
		1.01277
		1.01294
		1.01336
		1.01345
		1.0139
		1.014
		1.01424
		1.01482
		1.01526
		1.01581
		1.01885
		1.01915
		1.01978
		1.02127
		1.02211
		1.0224
		1.02312
		1.02337
		1.02345
		1.02361
		1.02448
		1.02448
		1.02462
		1.02475
		1.0249
		1.02508
		1.02518
		1.02527
		1.02601
		1.02628
		1.02637
		1.02649
		1.02709
		1.02741
		1.02828
		1.02892
		1.02929
		1.03193
		1.03253
		1.03305
		1.03317
		1.03362
		1.03508
		1.03512
		1.0352
		1.03543
		1.03556
		1.03582
		1.03584
		1.03727
		1.03792
		1.03824
		1.03849
		1.03973
		1.03998
		1.0401
		1.04049
		1.04152
		1.04159
		1.04182
		1.04236
		1.04478
		1.04528
		1.04556
		1.04658
		1.04679
		1.04711
		1.04781
		1.04814
		1.04854
		1.04879
		1.0488
		1.04972
		1.05009
		1.05136
		1.05212
		1.05246
		1.05323
		1.05379
		1.05408
		1.05458
		1.05519
		1.05545
		1.05668
		1.05708
		1.05732
		1.05838
		1.05864
		1.05955
		1.06034
		1.06043
		1.06145
		1.06227
		1.06334
		1.06399
		1.06404
		1.06414
		1.06493
		1.0664
		1.0665
		1.06661
		1.0667
		1.06856
		1.06887
		1.06948
		1.07047
		1.07082
		1.07184
		1.07186
		1.07217
		1.07278
		1.07337
		1.07436
		1.07566
		1.07625
		1.07666
		1.07734
		1.07734
		1.07756
		1.07952
		1.07983
		1.08038
		1.08051
		1.08088
		1.08265
		1.08405
		1.08434
		1.08478
		1.08601
		1.08806
		1.0882
		1.08838
		1.08863
		1.08917
		1.0894
		1.09111
		1.09237
		1.09265
		1.09293
		1.09379
		1.0953
		1.0956
		1.09695
		1.09826
		1.0984
		1.09842
		1.09852
		1.09917
		1.0996
		1.09982
		1.10099
		1.10124
		1.102
		1.10229
		1.10512
		1.10565
		1.10604
		1.10633
		1.10685
		1.1071
		1.10724
		1.10793
		1.10891
		1.10926
		1.11015
		1.11068
		1.11152
		1.11209
		1.11244
		1.11303
		1.11386
		1.11468
		1.11474
		1.11514
		1.11573
		1.11612
		1.11718
		1.11754
		1.11764
		1.11795
		1.11963
		1.11983
		1.11999
		1.12055
		1.12067
		1.12144
		1.1222
		1.12304
		1.12353
		1.12414
		1.1261
		1.12629
		1.12694
		1.12712
		1.12766
		1.12772
		1.12784
		1.12835
		1.12838
		1.1286
		1.12924
		1.13032
		1.13148
		1.13159
		1.13309
		1.13451
		1.13534
		1.13621
		1.13708
		1.13726
		1.13729
		1.13831
		1.13845
		1.14007
		1.14011
		1.14114
		1.14126
		1.14193
		1.14201
		1.14249
		1.14289
		1.14378
		1.1442
		1.14497
		1.14557
		1.14652
		1.14691
		1.14742
		1.14817
		1.14831
		1.14882
		1.14904
		1.14908
		1.15003
		1.15005
		1.15028
		1.15182
		1.15225
		1.15368
		1.15375
		1.15381
		1.15445
		1.15488
		1.15599
		1.15613
		1.15755
		1.15779
		1.15838
		1.15854
		1.15868
		1.15894
		1.15898
		1.15932
		1.1607
		1.16223
		1.16448
		1.16462
		1.16488
		1.16504
		1.16545
		1.16552
		1.16818
		1.16861
		1.16874
		1.16975
		1.17131
		1.17276
		1.17278
		1.17288
		1.17402
		1.17529
		1.17614
		1.17694
		1.17867
		1.18086
		1.18191
		1.18209
		1.18259
		1.18418
		1.18455
		1.18461
		1.18466
		1.1851
		1.18517
		1.18535
		1.18896
		1.18913
		1.18993
		1.18999
		1.19054
		1.19078
		1.19079
		1.19181
		1.19185
		1.19375
		1.19418
		1.19438
		1.19506
		1.19551
		1.19676
		1.19706
		1.19777
		1.19941
		1.19948
		1.19963
		1.20064
		1.20148
		1.20232
		1.20326
		1.20406
		1.20428
		1.2048
		1.20501
		1.20585
		1.20609
		1.20742
		1.20743
		1.20783
		1.20947
		1.20954
		1.20977
		1.21121
		1.21156
		1.21197
		1.21226
		1.2125
		1.21255
		1.21389
		1.21518
		1.21781
		1.21916
		1.21925
		1.21969
		1.21991
		1.22145
		1.22174
		1.22256
		1.22288
		1.22305
		1.22312
		1.2233
		1.2235
		1.2236
		1.22431
		1.22641
		1.22734
		1.22955
		1.23091
		1.23091
		1.2312
		1.23174
		1.23228
		1.23282
		1.23296
		1.23419
		1.23439
		1.23647
		1.23758
		1.23802
		1.2399
		1.23992
		1.23994
		1.24061
		1.24083
		1.24144
		1.24149
		1.24193
		1.24464
		1.24673
		1.24677
		1.24924
		1.24927
		1.24951
		1.25163
		1.25226
		1.25346
		1.25426
		1.25508
		1.25714
		1.2589
		1.25979
		1.26038
		1.26152
		1.26176
		1.26336
		1.26358
		1.26418
		1.26503
		1.26831
		1.27046
		1.27059
		1.27244
		1.27262
		1.27313
		1.27319
		1.27402
		1.27423
		1.27448
		1.27474
		1.27481
		1.27553
		1.27579
		1.27681
		1.27821
		1.27962
		1.27996
		1.27998
		1.28128
		1.28189
		1.28248
		1.28289
		1.2834
		1.28381
		1.28383
		1.28411
		1.28494
		1.28511
		1.28596
		1.28681
		1.28873
		1.29113
		1.29215
		1.29267
		1.29408
		1.2942
		1.2945
		1.29563
		1.29889
		1.29954
		1.29957
		1.29976
		1.30014
		1.30036
		1.30039
		1.30072
		1.30285
		1.30345
		1.30467
		1.30523
		1.30709
		1.30836
		1.30974
		1.30978
		1.31024
		1.31026
		1.31181
		1.31186
		1.31197
		1.31263
		1.31459
		1.31669
		1.31676
		1.31945
		1.32127
		1.32135
		1.32167
		1.32518
		1.32526
		1.32624
		1.3275
		1.32886
		1.32919
		1.32924
		1.32987
		1.32989
		1.33042
		1.33225
		1.3327
		1.33289
		1.33421
		1.33447
		1.33621
		1.33821
		1.33858
		1.33862
		1.33923
		1.33935
		1.341
		1.34205
		1.3431
		1.34579
		1.3465
		1.34733
		1.34813
		1.34872
		1.3497
		1.35112
		1.35138
		1.35237
		1.35397
		1.35433
		1.35469
		1.35484
		1.35515
		1.35532
		1.35706
		1.35869
		1.35904
		1.35931
		1.36151
		1.36159
		1.36181
		1.36218
		1.36261
		1.36525
		1.36543
		1.3663
		1.36815
		1.36825
		1.36866
		1.36956
		1.37106
		1.37177
		1.37365
		1.37402
		1.37408
		1.37532
		1.3754
		1.37568
		1.37616
		1.37645
		1.37758
		1.37899
		1.37927
		1.38093
		1.38223
		1.38282
		1.38305
		1.38422
		1.38464
		1.38491
		1.3873
		1.38792
		1.38922
		1.3896
		1.39014
		1.39039
		1.39196
		1.39211
		1.39243
		1.39309
		1.39367
		1.39491
		1.39711
		1.39861
		1.3988
		1.39911
		1.39977
		1.40071
		1.40145
		1.40282
		1.40492
		1.40629
[truncated: 407 more rows]

## Sheet: Figure 2D
DMSO	HF	BtdCPU	3610	0357
0.470721	0.694054	0.655985	0.644118	0.249536
0.333826	0.274073	0.850878	0.656027	0.616235
0.745833	0.603588	0.728142	0.416024	0.435224
0.662146	0.675303	0.740003	0.415208	0.649828
0.424997	0.69577	0.746012	0.488564	0.564175
0.68472	0.468947	0.779697	0.521574	0.411028
0.449297	0.633166	0.542543	0.466496	0.411377
0.896918	0.534482	0.805409	0.493782	0.353402
0.473724	0.178522	0.8226	0.483116	0.4452
0.518915	0.378119	0.656079	0.61723	0.760273
0.453056	0.381851	0.564098	0.504617	0.621027
0.347028	0.685682	0.782578	0.480264	0.312811
0.814988	0.148306	0.488908	0.600767	0.659697
0.525642	0.302054	0.51609	0.552632	0.437352
0.644825	0.562619	0.829457	0.755702	0.637646
0.48238	0.544991	0.294918	0.354441	0.283279
0.659072	0.458235	0.648281	0.680439	0.543101
0.592669	0.712835	0.673538	0.497145	0.470182
0.616446	0.601594	0.574919	0.259049	0.55409
0.701521	0.433871	0.757243	0.212398	0.353537
0.593296	0.428707	0.786471	0.333668	0.611831
0.794182	0.30045	0.653118	0.253992	0.399527
0.6866	0.502802	0.938082	0.59616	0.218046
0.92022	0.601274	0.834293	0.558992	0.232381
0.667282	0.648508	0.701381	0.688047	0.55155
0.517344	0.231172	0.775413	0.244514	0.225102
0.565013	0.567898	0.825659	0.641504	0.747526
0.397371	0.68923	0.944325	0.755609	0.63909
0.639222	0.762096	0.324713	0.163256	0.677578
0.807666	0.139479	0.616201	0.649706	0.785425
0.808564	0.54427	0.659218	0.611998	0.401386
0.631906	0.400216	0.452091	0.657428	0.269822
0.633745	0.75805	0.903747	0.259015	0.708057
0.529364	0.364919	0.785137	0.657778	0.63835
0.595902	0.325086	0.864348	0.583648	0.648128
0.601076	0.539993	0.446474	0.226698	0.356134
0.555312	0.319557	0.833689	0.486756	0.470677
0.307434	0.422509	0.813688	0.659451	0.227352
0.570361	0.706056	0.435552	0.573205	0.691106
0.746953	0.388049	0.808479	0.641861	0.541536
0.606869	0.168789	0.475067	0.602012	0.583372
0.774735	0.331445	0.836769	0.517231	0.245144
0.461077	0.459684	0.297662	0.711225	0.62479
0.548379	0.51723	0.361837	0.566958	0.653552
0.669217	0.299795	0.875314	0.691804	0.575067
0.890493	0.139627	0.716356	0.890355	0.45309
0.659108	0.514158	0.398973	0.534997	0.572989
0.659572	0.583564	0.496336	0.688904	0.546495
0.480418	0.573111	0.76575	0.677775	0.541666
0.77414	0.482326	0.704269	0.161751	0.556231
0.658147	0.599641	0.850863	0.56415	0.720237
0.616237	0.479999	0.735212	0.42511	0.581394
0.533625	0.22847	0.289147	0.49633	0.62706
0.626386	0.248089	0.858561	0.637425	0.26281
0.818513	0.423934	0.846055	0.664996	0.702963
0.677577	0.21703	0.628771	0.635522	0.11975
0.439267	0.129544	0.886356	0.351114	0.817776
0.717467	0.477969	0.811892	0.211626	0.26303
0.685235	0.76864	0.831329	0.700403	0.239858
0.566755	0.441969	0.878953	0.475475	0.8308
0.645037	0.832165	0.880934	0.572108	0.358719
0.463345	0.353665	0.86822	0.298294	0.711014
0.426315	0.605665	0.790707	0.5747	0.643541
0.501249	0.170815	0.70846	0.593487	0.503209
0.833681	0.631369	0.848898	0.595897	0.394477
0.197525	0.622515	0.787028	0.127591	0.632305
0.852821	0.633408	0.803986	0.455041	0.512167
0.743173	0.604663	0.725461	0.579075	0.364761
0.61733	0.516173	0.834518	0.5506	0.244723
0.643988	0.786944	0.885576	0.503722	0.494125
0.652308	0.625312	0.869935	0.149361	0.304506
0.385467	0.452796	0.782616	0.823516	0.196461
0.726988	0.525061	0.786715	0.213738	0.458282
0.725627	0.704924	0.574167	0.551489	0.248828
0.746904	0.495703	0.800151	0.469021	0.220231
0.442158	0.624531	0.662232	0.742614	0.441095
0.67133	0.255784	0.560894	0.705576	0.225014
0.915688	0.567401	0.737467	0.329894	0.726167
0.65556	0.528028	0.777162	0.626687	0.276096
0.359897	0.565468	0.444342	0.553781	0.199871
0.620208	0.592231	0.697049	0.166566	0.283263
0.897684	0.544041	0.823675	0.478921	0.653583
0.452999	0.440853	0.778499	0.30097	0.492053
0.617104	0.411383	0.764047	0.465414	0.489312
0.512201	0.36638	0.889091	0.181711	0.53341
0.312283	0.495567	0.816742	0.501175	0.211524
0.758268	0.503766	0.847772	0.465037	0.677179
0.691033	0.420261	0.762189	0.57896	0.799192
0.873286	0.516214	0.792187	0.514249	0.615793
0.482288	0.665468	0.865552	0.459239	0.167658
0.682301	0.498638	0.725943	0.913737	0.610707
0.71835	0.651236	0.708321	0.540299	0.33321
0.666019	0.426352	0.567387	0.240022	0.656277
0.708973	0.401306	0.646716	0.301182	0.532594
0.530251	0.180915	0.71566	0.541003	0.432855
0.537492	0.395217	0.733238	0.490177	0.625386
0.580737	0.526591	0.694517	0.342311	0.554358
0.804281	0.457192	0.78893	0.501177	0.496447
0.543912	0.70765	0.491459	0.274198	0.337038
0.600923	0.140235	0.777426	0.63687	0.283696
0.343704	0.298784	0.581557	0.491795	0.512015
0.641135	0.550457	0.62844	0.224677	0.161984
0.680362	0.422611	0.624684	0.651148	0.629342
0.802769	0.490746	0.612512	0.708891	0.393262
0.541108	0.588612	0.853226	0.341716	0.503044
0.738008	0.694271	0.78426	0.661253	0.433213
0.671053	0.285602	0.609356	0.61033	0.487378
0.793836	0.181405	0.840111	0.415589	0.398909
0.775987	0.265283	0.865026	0.4231	0.529221
0.8513	0.456326	0.700127	0.632825	0.480269
0.617327	0.554419	0.8713	0.643184	0.601221
0.820439	0.396791	0.85693	0.612323	0.379054
0.366571	0.348891	0.512383	0.316149	0.537458
0.24995	0.498229	0.415704	0.476638	0.601417
0.547116	0.530471	0.612015	0.654255	0.541055
0.730165	0.660468	0.592167	0.539832	0.243627
0.389946	0.546051	0.529338	0.585021	0.379003
0.51249	0.389931	0.77994	0.635398	0.422542
0.616716	0.564146	0.718366	0.318886	0.457432
0.494481	0.240386	0.535437	0.29592	0.560977
0.480702	0.597177	0.806595	0.666856	0.761319
0.389225	0.297638	0.875041	0.5883	0.708759
0.602114	0.178548	0.629213	0.531527	0.705405
0.586775	0.534664	0.888137	0.219968	0.64945
0.450392	0.693587	0.782298	0.453586	0.709693
0.627406	0.226104	0.914345	0.582226	0.708294
0.752093	0.110505	0.390445	0.61892	0.350113
0.50428	0.217681	0.785733	0.215762	0.538998
0.480843	0.188121	0.451337	0.511638	0.625372
0.723556	0.461814	0.960119	0.656755	0.474002
0.358739	0.950562	0.843624	0.394903	0.741761
0.604118	0.506277	0.598527	0.216797	0.597249
0.691309	0.64198	0.469803	0.669878	0.665759
0.707479	0.438394	0.657044	0.410689	0.794341
0.59698	0.365331	0.58638	0.621078	0.509254
0.815245	0.682305	0.694527	0.639043	0.548974
0.516037	0.444422	0.425843	0.292241	0.54943
0.692264	0.192118	0.745426	0.615857	0.633018
0.59481	0.56884	0.774012	0.494819	0.617479
0.701857	0.631889	0.501635	0.475859	0.148265
0.648921	0.743508	0.669934	0.54696	0.657158
0.413664	0.191223	0.291862	0.329032	0.662111
0.573175	0.794244	0.683383	0.637408	0.356761
0.52929	0.583971	0.562114	0.502963	0.600186
0.302745	0.548402	0.766624	0.580269	0.601914
0.296933	0.506302	0.872189	0.603494	0.486167
0.686947	0.506265	0.665184	0.605934	0.527794
0.652703	0.554015	0.881272	0.621633	0.388821
0.608745	0.376143	0.907089	0.566945	0.567523
0.502191	0.34973	0.722998	0.340856	0.5873
0.750685	0.480145	0.539853	0.394689	0.471555
0.879135	0.387877	0.732722	0.581978	0.48334
0.83123	0.563362	0.55509	0.689662	0.35026
0.626966	0.583998	0.937381	0.466478	0.579726
0.856461	0.211189	0.830851	0.696273	0.478557
0.473755	0.510856	0.929779	0.515028	0.553757
0.172733	0.539465	0.77585	0.133612	0.503149
0.829425	0.541773	0.822655	0.168412	0.666243
0.85378	0.586874	0.798566	0.366894	0.712126
0.399078	0.560861	0.867571	0.675066	0.515439
0.628883	0.362835	0.748008	0.275446	0.614028
0.584269	0.430141	0.567298	0.356628	0.43393
0.475329	0.425029	0.718427	0.370777	0.49521
0.739303	0.435402	0.748337	0.241812	0.641421
0.811663	0.437617	0.465894	0.179874	0.441332
0.401706	0.315914	0.868379	0.589536	0.300332
0.722057	0.282474	0.864407	0.336731	0.507624
0.828487	0.478002	0.946993	0.652418	0.597082
0.842562	0.430559	0.934365	0.52233	0.533519
0.795512	0.392588	0.683103	0.558533	0.389839
0.615018	0.507037	0.593793	0.26331	0.468465
0.426936	0.424169	0.660798	0.220711	0.714654
0.489966	0.421193	0.807714	0.573114	0.461533
0.448197	0.520858	0.631743	0.46795	0.598231
0.432688	0.333822	0.779851	0.571302	0.324175
0.590264	0.6213	0.276756	0.581848	0.488577
0.770569	0.353225	0.65629	0.522886	0.512587
0.660441	0.325328	0.587375	0.545139	0.562378
0.692456	0.341283	0.814946	0.416218	0.460647
0.70255	0.604295	0.864479	0.614652	0.423757
0.713525	0.535658	0.573216	0.17302	0.60855
0.739204	0.431085	0.479767	0.742583	0.721173
0.66044	0.289831	0.217429	0.544963	0.572732
0.719779	0.211401	0.931228	0.579855	0.383056
0.617653	0.148845	0.904196	0.504879	0.534665
0.731539	0.396168	0.824479	0.624439	0.347656
0.593239	0.51801	0.906988	0.70818	0.428359
0.184423	0.457255	0.838993	0.734725	0.526514
0.178327	0.491698	0.707828	0.709877	0.121512
0.753167	0.235428	0.627202	0.689516	0.589042
0.409095	0.164792	0.559944	0.44778	0.138536
0.657188	0.23254	0.930028	0.64542	0.227729
0.387439	0.431609	0.331863	0.539511	0.274061
0.688571	0.437203	0.77908	0.519733	0.611689
0.636741	0.22575	0.724133	0.615124	0.239707
0.334667	0.217204	0.467336	0.758741	0.138988
0.528378	0.406373	0.735738	0.680448	0.618442
0.271221	0.553196	0.783084	0.636633	0.588168
0.764705	0.299322	0.759075	0.367632	0.553106
0.492093	0.54572	0.671586	0.517961	0.619078
0.377692	0.345063	0.859065	0.564535	0.392633
0.653827	0.277838	0.528019	0.597382	0.645281
0.584047	0.414691	0.860185	0.491424	0.627438
0.590529	0.353963	0.602363	0.163792	0.419999
0.6732	0.561668	0.466576	0.723875	0.549376
0.205037	0.553374	0.783141	0.5843	0.833224
0.384596	0.267536	0.722168	0.373732	0.44108
0.401734	0.624179	0.624589	0.369734	0.461882
0.497033	0.517138	0.832904	0.321012	0.48591
0.411703	0.520909	0.898177	0.242511	0.519876
0.24523	0.571962	0.581844	0.489232	0.598617
0.337321	0.525639	0.860943	0.431362	0.813733
0.402838	0.316187	0.636857	0.406337	0.426587
0.617358	0.421941	0.307173	0.578168	0.658267
0.702057	0.641276	0.612177	0.489651	0.820618
0.445468	0.297289	0.496846	0.593395	0.492846
0.731403	0.617286	0.836111	0.205635	0.569221
0.731928	0.350877	0.429942	0.50079	0.575469
0.51427	0.297489	0.602724	0.455354	0.571756
0.465286	0.185264	0.905476	0.626858	0.562961
0.602779	0.201286	0.879433	0.649717	0.52743
0.551909	0.353988	0.600155	0.295202	0.621504
0.664654	0.269099	0.855489	0.328233	0.600374
0.450534	0.379906	0.69542	0.708478	0.585666
0.749083	0.301965	0.929324	0.648935	0.788547
0.739072	0.495099	0.571526	0.527718	0.425394
0.695084	0.240603	0.730098	0.636122	0.735976
0.859926	0.333196	0.466474	0.207947	0.270516
0.719872	0.308688	0.383321	0.64572	0.542802
0.811564	0.294245	0.579257	0.143804	0.51655
0.722935	0.249936	0.846846	0.46596	0.61164
0.664572	0.433407	0.728939	0.568626	0.333737
0.64582	0.30168	0.794796	0.43308	0.584644
0.636122	0.197112	0.645993	0.62351	0.21522
0.677578	0.203568	0.905692	0.486649	0.743879
0.787893	0.211188	0.870285	0.288395	0.544433
0.665773	0.43606	0.839899	0.243645	0.619547
0.701327	0.64078	0.76651	0.517686	0.491692
0.705928	0.495911	0.95596	0.599212	0.325627
0.640261	0.574689	0.734839	0.535215	0.552612
0.65843	0.61868	0.831246	0.405428	0.605087
0.680148	0.193183	0.862893	0.52746	0.348321
0.666546	0.46162	0.8497	0.539951	0.229922
0.53316	0.63835	0.788074	0.16624	0.45336
0.660779	0.718974	0.914286	0.759823	0.447379
0.425594	0.227739	0.663888	0.490459	0.183407
0.546612	0.509095	0.636091	0.670987	0.526267
0.712609	0.394632	0.756702	0.412082	0.601424
0.670285	0.795993	0.733387	0.526515	0.434054
0.484553	0.484008	0.888539	0.220097	0.550623
0.467744	0.59849	0.548332	0.222696	0.575348
0.647328	0.488486	0.432252	0.467177	0.609319
0.651904	0.571766	0.528351	0.548221	0.70632
0.637349	0.63261	0.886524	0.485451	0.255317
0.618722	0.181198	0.694402	0.689216	0.356373
0.590322	0.761948	0.753747	0.421865	0.268554
0.492591	0.649433	0.652681	0.198112	0.507112
0.343275	0.190461	0.694812	0.226785	0.553594
0.352647	0.545621	0.868466	0.200712	0.524117
0.436824	0.732356	0.870735	0.479384	0.750167
0.489659	0.174325	0.81812	0.66659	0.582447
0.678639	0.671496	0.817935	0.628897	0.746679
0.852595	0.505177	0.794394	0.34139	0.274956
0.334046	0.529622	0.369259	0.50575	0.324602
0.512272	0.156316	0.56237	0.457857	0.564776
0.359223	0.475531	0.61665	0.62488	0.580649
0.504829	0.69635	0.604918	0.415544	0.45593
0.58781	0.282981	0.76306	0.453389	0.473914
0.646345	0.394229	0.844676	0.291933	0.534851
0.45545	0.154182	0.83756	0.384368	0.598853
0.723265	0.573186	0.487723	0.729157	0.258823
0.367408	0.127913	0.491393	0.517487	0.509422
0.584518	0.535028	0.82389	0.541814	0.153343
0.750854	0.439287	0.780195	0.482496	0.53631
0.568822	0.79583	0.962546	0.562214	0.389748
0.480276	0.443609	0.743666	0.621084	0.504485
0.615095	0.239514	0.629196	0.282686	0.692085
0.53698	0.525947	0.877888	0.341736	0.750319
0.464363	0.618718	0.734939	0.38566	0.716956
0.549995	0.39618	0.598628	0.542891	0.818809
0.606469	0.550831	0.760082	0.27057	0.678185
0.310699	0.284262	0.886693	0.497941	0.875157
0.415783	0.528824	0.905424	0.461001	0.648106
0.699349	0.190652	0.328464	0.535795	0.717305
0.367845	0.906919	0.806538	0.553336	0.564586
0.494783	0.468379	0.684348	0.520175	0.19816
0.695045	0.837683	0.912409	0.545058	0.386555
0.344395	0.623582	0.869007	0.650418	0.727391
0.303423	0.597145	0.805274	0.544578	0.888606
0.696858	0.16693	0.724581	0.674188	0.678354
0.583304	0.7001	0.806128	0.694182	0.777252
0.640416	0.520699	0.922152	0.362454	0.657857
0.403453	0.739151	0.62254	0.235299	0.573289
0.569728	0.33266	0.505418	0.247592	0.59216
0.598206	0.476994	0.879636	0.207853	0.168432
0.612861	0.327485	0.793529	0.46605	0.54752
0.547237	0.916118	0.817926	0.429566	0.539757
0.655135	0.767462	0.951925	0.326852	0.367291
0.644577	0.265166	0.699609	0.304449	0.538228
0.478047	0.218201	0.793151	0.307468	0.581535
0.571632	0.387415	0.835332	0.250963	0.583797
0.453647	0.145144	0.699347	0.630589	0.172966
0.496207	0.410955	0.626223	0.587795	0.493873
0.745657	0.596346	0.361615	0.495965	0.787983
0.381532	0.491899	0.672864	0.496038	0.146944
0.580057	0.214281	0.573044	0.463147	0.686845
0.489105	0.464961	0.821257	0.353242	0.784662
0.7511	0.398713	0.704849	0.639063	0.552702
0.771976	0.22467	0.562652	0.421618	0.526956
0.8188	0.265106	0.786291	0.578005	0.635798
0.61552	0.468237	0.826011	0.567307	0.546729
0.694754	0.406986	0.430229	0.56807	0.657279
0.627968	0.35189	0.519035	0.172108	0.429924
0.518219	0.586418	0.813393	0.41677	0.508788
0.672781	0.663992	0.662288	0.502132	0.535226
0.250821	0.612914	0.563596	0.331115	0.716659
0.329339	0.226089	0.820836	0.526313	0.219821
0.489941	0.555136	0.564678	0.246041	0.640333
0.753452	0.674477	0.859561	0.623442	0.313833
0.532563	0.411987	0.86592	0.501473	0.658916
0.536106	0.39817	0.555992	0.178788	0.497088
0.557696	0.607041	0.910551	0.639078	0.596455
0.68054	0.160662	0.460542	0.494702	0.514528
0.526205	0.512339	0.744288	0.450645	0.490166
0.692751	0.239496	0.865363	0.468925	0.732329
0.71379	0.39415	0.777142	0.427083	0.591514
0.508896	0.307967	0.817881	0.678658	0.454413
0.781083	0.401846	0.882216	0.518727	0.492625
0.716965	0.6443	0.727956	0.664215	0.373758
0.490892	0.567982	0.539449	0.18203	0.304618
0.742604	0.534011	0.691801	0.697763	0.204755
0.648186	0.227727	0.857958	0.187895	0.269084
0.556266	0.527866	0.791085	0.540174	0.182129
0.822821	0.568993	0.766686	0.625115	0.641256
0.559514	0.591079	0.259908	0.681519	0.735659
0.513303	0.356917	0.761976	0.614652	0.746956
0.802114	0.555337	0.762038	0.611737	0.475095
0.726715	0.22243	0.787023	0.147324	0.539095
0.697183	0.467314	0.416713	0.383698	0.244348
0.729083	0.118914	0.343559	0.274199	0.482482
0.55168	0.189343	0.754198	0.189867	0.242816
0.789934	0.438584	0.920672	0.552725	0.686867
0.826803	0.497884	0.791687	0.219941	0.422494
0.464522	0.263252	0.916623	0.403877	0.34528
0.507148	0.472768	0.688373	0.936331	0.399599
0.540991	0.381786	0.698001	0.508239	0.326269
0.830095	0.595191	0.731414	0.457042	0.657755
0.777839	0.449653	0.542496	0.504313	0.272332
0.496916	0.195352	0.771873	0.502508	0.663248
0.451599	0.486454	0.698852	0.409586	0.740024
0.590309	0.546104	0.87385	0.741611	0.445478
0.498629	0.605334	0.882359	0.714551	0.203574
0.573006	0.565662	0.577611	0.593604	0.636488
0.728714	0.601478	0.870046	0.495978	0.299424
0.441573	0.604915	0.901273	0.539303	0.138972
0.526967	0.375137	0.791964	0.65505	0.389926
0.819597	0.741485	0.916262	0.476379	0.608325
0.555773	0.465958	0.710826	0.676539	0.495747
0.740947	0.460784	0.896998	0.672979	0.205575
0.657039	0.531223	0.707047	0.242067	0.579065
0.724663	0.149136	0.680663	0.230302	0.231267
0.574702	0.533649	0.785597	0.649466	0.521721
0.835088	0.553236	0.701336	0.205073	0.556395
0.342726	0.393972	0.470275	0.476222	0.540819
0.561027	0.632222	0.214671	0.666642	0.678506
0.521759	0.57563	0.793654	0.563814	0.217786
0.721496	0.445558	0.765238	0.252364	0.347114
0.585141	0.192543	0.310538	0.734809	0.376472
0.575447	0.469596	0.584493	0.212147	0.293525
0.626869	0.251902	0.751161	0.472416	0.696631
0.361707	0.601706	0.78589	0.292936	0.503593
0.380728	0.318618	0.419261	0.251966	0.289683
0.655766	0.203569	0.812129	0.461241	0.702287
0.608109	0.568271	0.397322	0.596962	0.405285
0.622265	0.621085	0.329298	0.560705	0.634819
0.551194	0.501284	0.479556	0.625458	0.19405
0.452934	0.470366	0.213972	0.362513	0.738105
0.489891	0.48839	0.856528	0.442795	0.564905
0.654189	0.345785	0.777628	0.485161
0.453494	0.223559	0.681332	0.593062
0.734234	0.146856	0.891961	0.593804
0.322944	0.559644	0.906764	0.326115
0.669846	0.132503	0.519039	0.43265
0.542031	0.143191	0.915817	0.494031
0.477756	0.560094	0.62281	0.196865
0.525559	0.251687	0.757056	0.661785
0.763486		0.891463	0.508093
0.677281		0.473757	0.777219
0.470031		0.861751	0.291076
0.539115		0.871215	0.650299
0.628207		0.731884	0.722548
0.493436		0.682407	0.631285
0.823685		0.814895	0.566107
0.617208		0.36666	0.493484
0.51877		0.643307	0.61564
0.627875		0.901306	0.709578
0.508687		0.651125	0.490625
0.531141		0.825836	0.575187
0.883834		0.793525	0.580752
0.592562		0.801783	0.257949
0.64539		0.619317	0.678968
0.748031		0.688315	0.497979
0.706888		0.690573	0.316705
0.700742		0.932924	0.475917
0.594199		0.896342	0.521302
0.319985		0.765127	0.46893
0.361766		0.826348	0.334378
0.589129		0.765297	0.317379
0.677428		0.795201	0.542
0.837033		0.924827	0.600493
0.635953		0.947415	0.274606
0.509576		0.688162	0.619931
0.285685		0.883951	0.381679
0.604531		0.859285	0.130582
0.428977		0.91385	0.570066
0.466396		0.720804	0.432665
0.530341		0.49549	0.621916
0.73134		0.87847	0.678242
0.483247		0.581863	0.200393
0.727026		0.850937	0.257322
0.287244		0.589171	0.676244
0.490344		0.889218	0.562801
0.318794		0.571807	0.207189
0.66153		0.946675	0.469157
0.86214		0.580793	0.680484
0.434879		0.737401	0.516102
0.311474		0.770402	0.609163
0.629907		0.732872	0.607426
0.529421		0.866728	0.521286
0.563767		0.739366	0.571832
0.344521		0.784578	0.465363
0.628482		0.858153	0.55667
0.367984		0.278473	0.138659
0.577859		0.714787	0.746304
0.373117		0.899522	0.453067
0.628139		0.804477	0.438138
0.396569		0.70301	0.611025
0.292474		0.738338	0.47386
0.468455		0.672947	0.160091
0.709632		0.710508	0.699841
0.390852		0.841713	0.570163
0.757322		0.963861	0.231917
0.407643		0.851858	0.466063
0.230318		0.649837	0.538484
0.591527		0.746608	0.234609
0.647719		0.65656	0.226443
0.627333		0.798061
0.44452		0.556956
0.349811		0.411402
0.430555		0.795886
0.420274		0.718483
0.64884		0.929976
0.880359		0.63622
0.64897		0.479379
0.689147		0.728343
0.537374		0.778031
0.615331		0.875368
0.832728		0.768067
0.6999		0.930178
0.623392		0.418765
0.358029		0.396433
0.428176		0.913701
0.606916		0.380236
0.555384		0.307903
0.410482		0.82337
0.575333		0.659539
0.490596		0.827001
0.682602		0.643123
0.577709		0.312356
0.783047		0.762465
0.738008		0.375587
0.580007		0.755345
0.460109		0.872627
0.549118		0.837712
0.556142		0.537215
0.585447		0.771281
0.494357		0.932924
0.241255		0.690235
0.37576		0.704416
0.493045		0.389963
0.709487		0.64554
0.679008		0.627052
0.639293		0.581726
0.549459		0.857052
0.318859		0.835755
0.626183		0.759604
0.584856		0.498743
0.51993		0.567039
0.55295		0.790733
0.587504		0.911959
0.699658		0.467724
0.638759		0.678392
0.634671		0.799264
0.479662		0.958229
0.639066		0.828936
0.838313		0.66349
0.453344		0.410357
0.688868		0.692353
0.658333		0.453084
0.577635		0.930163
0.606122		0.841679
0.401145		0.879784
0.817012		0.368632
0.561629		0.455987
0.394444		0.907375
0.544434		0.523379
0.651069		0.634471
0.478284		0.571349
0.737403		0.771699
0.394436		0.817841
0.318375		0.924551
0.627802		0.654159
0.381348		0.74924
0.17835		0.418867
0.481206		0.717524
0.702902		0.660019
0.382447		0.601404
0.519041		0.892293
0.691769		0.769291
0.64644		0.813339
0.481867		0.884283
0.34894		0.788438
0.398357		0.73672
0.685588		0.646709
0.834484		0.631563
0.514757		0.620855
0.592813		0.799334
0.303991		0.578931
0.513715		0.822848
0.60367		0.815444
0.536253		0.564277
0.557719		0.395424
0.698388		0.618058
0.477516		0.874106
0.646439		0.871566
0.303163		0.712026
0.296011		0.879922
0.671161		0.632383
0.472129		0.486082
0.606467		0.612676
0.666382		0.889496
0.661801		0.869781
0.776565		0.790858
0.767224		0.741743
0.372761		0.599867
0.700851		0.93879
0.572637		0.74499
0.678491		0.85254
0.67917		0.90764
0.291429		0.779693
0.602286		0.734969
0.671307		0.644213
0.723162		0.780211
0.663465		0.926441
0.574586		0.967165
0.606548		0.855702
0.463074		0.93262
0.568814		0.818345
0.629206		0.751823
0.65896		0.802858
0.549443		0.85503
0.437489		0.863021
0.73318		0.764802
0.598703		0.332757
0.598083		0.64124
0.584432		0.585446
0.510895		0.804396
0.637268		0.89895
0.513711		0.604777
0.541872		0.521846
0.658117		0.516412
0.71243		0.651192
0.608344		0.3956
0.623332		0.347655
0.543743		0.565409
0.59688		0.778752
0.851018		0.71311
0.525291		0.837484
0.523394		0.727877
0.577706		0.936517
0.77834		0.755746
0.494859		0.707955
0.611151		0.746139
0.462478		0.352977
0.450763		0.672099
0.668336		0.576967
0.779622		0.672255
0.423489		0.914022
0.506303		0.896901
0.773186		0.671236
0.494108		0.714214
0.545502		0.456809
0.535864		0.478161
0.655557		0.57563
0.381497		0.740432
0.791748		0.679832
0.407777		0.758471
0.542183		0.91058
0.667528		0.831108
0.76266		0.633253
0.626162		0.650133
0.70805		0.733311
0.38473		0.419264
0.693934		0.720588
0.479908		0.846623
0.659749		0.863403
0.91738		0.481222
0.570139		0.539386
0.485207		0.537191
0.328763		0.523304
0.691511		0.647482
0.655243		0.702425
0.752426		0.86885
0.692262		0.677922
0.560097		0.364326
0.709209		0.611058
0.485373		0.659306
0.532792		0.768323
0.510943		0.551092
0.562774		0.765403
0.777933		0.913031
0.632714		0.421386
0.670421		0.347862
0.53433		0.515067
0.64411		0.777794
0.325332		0.892251
0.823664		0.778194
0.791929		0.732898
0.679225		0.690506
0.733701		0.649882
0.393903		0.595585
0.589397		0.694505
0.58146		0.71499
0.754905		0.780952
0.561553		0.679416
0.409679		0.676952
0.582593		0.716883
0.555556		0.779492
0.614037		0.751419
0.71209		0.746961
0.385817		0.573551
0.457503		0.668052
0.73661		0.50335
0.525078		0.632902
0.662226		0.488284
0.64101		0.49779
0.2853		0.823781
0.55029		0.844196
0.662238		0.405648
0.548206		0.926803
0.798022		0.550832
0.839968		0.661812
0.524096		0.890774
0.552414		0.841055
0.345769		0.759931
0.646646		0.842402
0.548104		0.483827
0.592144		0.497017
0.618148		0.868524
0.826583		0.688714
0.750795		0.799359
0.597991		0.609995
0.602853		0.723756
0.333745		0.559065
0.681443		0.716587
0.258184		0.775847
0.846672		0.663121
0.754813		0.812576
0.389427		0.704765
0.7092		0.731292
0.722382		0.496248
0.833121		0.649665
0.471808		0.655451
0.523594		0.767833
0.453905		0.637799
0.741782		0.526823
0.20466		0.575519
0.404844		0.771655
0.417364		0.781277
0.365255		0.723041
0.210413		0.475203
0.572159		0.619146
0.420057		0.82212
0.514733		0.616733
0.85825		0.488418
0.393777		0.762857
0.461414		0.906973
0.330354		0.823166
0.665211		0.75749
0.476789		0.519912
0.833205		0.848371
0.697488		0.668691
0.539797		0.866955
0.604672		0.850736
0.776441		0.529867
0.485956		0.706593
0.678753		0.598433
0.788827		0.668197
0.613679		0.601068
0.590225		0.466146
0.721879		0.837743
0.35905		0.747106
0.448512		0.611645
0.519126		0.70468
0.694986		0.561581
0.422772		0.728159
0.479788		0.45558
0.697935		0.600887
0.714904		0.816991
0.620382		0.930059
0.261498		0.652097
0.716886		0.874585
0.612512		0.738407
0.605666		0.639454
0.566359		0.835819
0.580587		0.64411
0.787058		0.554156
0.358877		0.723992
0.228832		0.868186
0.761598		0.570893
0.620537		0.215957
0.441919		0.506918
0.786197		0.645465
0.688403		0.892452
0.676152		0.481061
0.814812		0.856472
0.530524		0.410819
0.49406		0.715633
0.664464		0.678186
0.701497		0.394989
0.619513		0.735696
0.67414		0.871124
0.659624		0.710553
0.365219		0.849714
0.70728		0.223935
0.684098		0.890031
0.677151		0.619063
0.720808		0.593394
0.433405		0.742497
0.365014		0.25421
0.281778		0.45887
0.427445		0.759979
0.659372		0.713678
0.634572		0.725705
0.468664		0.664879
0.489074		0.460712
0.818942		0.921604
0.335867		0.613509
0.353308		0.673598
0.677986		0.570219
0.591674		0.746522
0.2282		0.523956
0.67573		0.804449
0.227689		0.836252
0.383659		0.565189
0.685207		0.412151
0.698884		0.860572
0.723782		0.767624
0.603774		0.631391
0.772828		0.960119
0.401311		0.887246
0.662047		0.824692
0.179453		0.708035
0.690991		0.925785
0.368047		0.953746
0.666484		0.794682
0.723899		0.429226
0.483281		0.401933
0.551232		0.824905
0.642236		0.939327
0.645733		0.779343
0.868527		0.852877
0.639811		0.813163
0.3053		0.65951
0.741179		0.719085
0.628204		0.715698
0.449505		0.670499
0.30465		0.806259
0.501927		0.91056
0.447691		0.634442
0.464967		0.930868
0.811728		0.821512
0.653961		0.46999
0.764245		0.860864
0.612767		0.633142
0.308456		0.869538
0.474505		0.311807
0.492329		0.82648
0.441119		0.67564
0.655558		0.842824
0.463432		0.814285
0.645772		0.631955
0.245919		0.871097
0.591684		0.787328
0.572102		0.843846
0.310121		0.713091
0.345174		0.794068
0.502839		0.721618
0.748923		0.480047
0.495037		0.628165
0.207401		0.506982
0.680877		0.809344
0.451466		0.846658
0.276547		0.896944
0.622264		0.782233
0.691794		0.762253
0.280234		0.703127
0.819459		0.900384
0.62897		0.836391
0.631247		0.634164
0.442981		0.598325
0.616722		0.925619
0.757796		0.715265
0.615886		0.910236
0.278033		0.812381
0.648652		0.59493
0.844744		0.530822
0.519162		0.740864
0.613737		0.612675
0.588863		0.756413
0.626521		0.574848
0.806155		0.892766
0.37148		0.694333
0.226093		0.658983
0.27946		0.835138
0.343275		0.853394
0.610397		0.68802
0.829313		0.705583
0.389841		0.757377
0.50083		0.600648
0.704345		0.933218
0.569016		0.430993
0.638323		0.7021
0.605615		0.895004
0.520449		0.751921
0.643244		0.871903
0.79276		0.661733
0.76073		0.583638
0.697149		0.956428
0.717686		0.93878
0.51738		0.793758
0.80692		0.686944
0.655706		0.747515
0.400084		0.908704
0.480625		0.660775
0.478518		0.889281
0.71161		0.667916
0.812657		0.746707
0.407841		0.882126
0.861646		0.771926
0.687463		0.643925
0.579021		0.408671
0.735838		0.615964
0.302158		0.845128
0.738788		0.759381
0.608649		0.510637
0.654973		0.595046
0.671712		0.868805
0.494158		0.765862
0.51234		0.604992
0.66249		0.73048
0.609967		0.75515
0.700179		0.695538
0.631081		0.787113
0.631614		0.679661
0.568539		0.34632
0.531781		0.496679
0.717636		0.805206
0.378266		0.501465
0.63196		0.8104
0.583294		0.645675
0.655302		0.860833
0.255092		0.579495
0.773599		0.523043
0.639358		0.789392
0.607261		0.661142
0.651672		0.606224
0.622059		0.775605
0.528223		0.792244
0.591155		0.626195
0.529058		0.858153
0.429306		0.517517
0.613285		0.827193
0.718312		0.893905
0.789211		0.924754
0.703927		0.53886
0.559629		0.73368
0.248429		0.688127
0.667778		0.726189
0.500434		0.840648
0.619305		0.660827
0.568558		0.75353
0.797757		0.87704
0.333895		0.414061
0.559008		0.695649
0.360846		0.887019
0.434095		0.883725
0.636922		0.533629
0.798475		0.50647
0.570436		0.937545
0.814266		0.815001
0.267024		0.782222
0.535368		0.424891
0.66277		0.462842
0.443554		0.55351
0.502052		0.648358
0.803593		0.305728
0.391517		0.735326
0.419673		0.762384
0.454872		0.822352
0.685197		0.733702
0.364699		0.642158
0.475655		0.519504
0.491412		0.89065
0.552226		0.874423
0.679526		0.613551
0.35649		0.663706
0.424521		0.788401
0.295767		0.887332
0.438035		0.554558
0.565578		0.580887
0.315677		0.56843
0.234605		0.661499
0.944776		0.84948
0.659344		0.604707
0.315943		0.742187
0.220869		0.720593
0.573497		0.833091
0.734056		0.739026
0.412428		0.85419
0.418008		0.770153
0.636477		0.804743
0.442832		0.91135
0.702554		0.553358
0.297799		0.694031
0.687788		0.592984
0.296447		0.930591
0.524278		0.571118
0.401928		0.809228
0.678605		0.877647
0.541937		0.568654
0.502376		0.614948
0.532782		0.571353
0.501357		0.458271
0.594866		0.944466
0.482697		0.577489
0.527268		0.584509
0.825919		0.78917
0.572189		0.904107
0.351839		0.900776
0.695591		0.88352
0.603078		0.662853
0.457051		0.776443
0.743764		0.757572
0.796069		0.444262
0.255468		0.644352
0.224372		0.617964
0.246224		0.412551
0.539063		0.873288
0.679105		0.596959
0.511633		0.540055
0.764695		0.903082
0.557235		0.378516
0.818781		0.636736
0.61498		0.742273
0.302973		0.646594
0.688434		0.429539
0.829425		0.5838
0.574896		0.479991
0.647301		0.622539
0.620684		0.713253
0.636737		0.552054
0.583093		0.63562
0.729408		0.834243
0.82098		0.332159
0.362244		0.949844
0.231955		0.782706
0.829075		0.672452
0.646358		0.60501
0.440711		0.68007
0.45105		0.543259
0.430847		0.725145
0.688755		0.855907
0.528025		0.689513
0.344758		0.750049
0.578218		0.342661
0.743425		0.880601
0.472222		0.247318
0.528694		0.72421
0.671048		0.651018
0.556555		0.860074
0.644777		0.900249
0.894687		0.500779
0.600169		0.784902
0.20702		0.400435
0.633393		0.931562
0.644683		0.928681
0.715994		0.567068
0.724763		0.710536
0.563737		0.770414
0.719441		0.807424
0.376848		0.651565
0.726263		0.62936
0.485556		0.870624
0.773982		0.916496
0.525703		0.823112
0.771994		0.485818
0.641442		0.890297
0.327989		0.945791
0.702111		0.58999
0.318622		0.702095
0.773062		0.344909
0.266546		0.233744
0.465518		0.705958
0.795432		0.561505
0.355887		0.857087
0.437498		0.71078
0.297374		0.860658
0.235527		0.64312
0.472649		0.314754
0.650409		0.689395
0.849233		0.67696
0.531424		0.817706
0.649061		0.892794
0.528858		0.569982
0.864431		0.741853
0.425862		0.862765
0.752983		0.90942
0.32373		0.80274
0.664329		0.290874
0.771285		0.797342
0.335175		0.573286
0.173947		0.603174
0.328438		0.745914
0.753552		0.86071
0.825313		0.955317
0.575136		0.293167
0.760845		0.663715
0.818254		0.761659
0.760299		0.755012
0.345944		0.648328
0.754208		0.647933
0.528581		0.842393
0.848368		0.534959
0.646933		0.699659
0.633269		0.895771
0.4206		0.371096
0.513741		0.685724
0.635236		0.6562
0.551574		0.510054
0.766581		0.758528
0.702964		0.738582
0.699715		0.456429
0.689314		0.527043
0.833049		0.601545
0.694302		0.830063
0.28827		0.784444
0.708881		0.894729
0.442969		0.741378
0.460901		0.557126
0.670624		0.606172
0.674545		0.802216
0.73554		0.679997
0.444205		0.894818
0.313799		0.815715
0.792094		0.653757
0.513038		0.604667
0.490106		0.838172
0.887891		0.846812
0.8353		0.650956
0.428462		0.341347
0.64588		0.801218
0.456372		0.729906
0.499426		0.756729
0.627522		0.88029
0.58693		0.888494
0.674211		0.696753
0.884986		0.210134
0.499075		0.94312
0.231074		0.833955
0.690387		0.816527
0.703446		0.756639
0.438191		0.587561
0.509901		0.338595
0.416896		0.892444
0.737432		0.679581
0.492269		0.833991
0.659736		0.772043
0.389452		0.736832
0.346359		0.470196
0.45628		0.700432
0.554674		0.868563
0.513009		0.726959
0.673298		0.408648
0.438924		0.853067
0.393488		0.355451
0.205249		0.688951
0.654162		0.863094
0.632521		0.307363
0.503778		0.733423
0.566074		0.729863
0.660698		0.681656
0.625575		0.823783
0.678526		0.624086
0.553325		0.556762
0.761529		0.443842
0.330428		0.432689
0.763552		0.62893
0.376104		0.55593
0.699822		0.645567
0.507846		0.857913
0.654185		0.777186
0.527683		0.756653
0.659409		0.687284
0.601027		0.656141
0.856935		0.53382
0.64581		0.885968
0.774627		0.728104
0.345601		0.748339
0.474731		0.751685
0.504314		0.668136
0.786177		0.494118
0.438712		0.743378
0.628148		0.5328
0.344967		0.532181
0.646201		0.791946
0.701256		0.829175
0.703144		0.821075
0.350927		0.873391
0.857114		0.654343
0.309093		0.607068
0.544205		0.639805
0.305806		0.496539
0.594469		0.663886
0.588071		0.816013
0.309635		0.613668
0.597584		0.824962
0.656691		0.758952
0.452163		0.463086
0.62303		0.429871
0.690741		0.660113
0.207993		0.611169
0.59517		0.917755
0.796715		0.782571
0.823087		0.632807
0.495972		0.661046
0.528972		0.784717
0.526376		0.624111
0.897596		0.578499
0.727217		0.714969
0.60022		0.795953
0.327712		0.693398
0.587224		0.878671
0.371895		0.742789
0.621483		0.596176
0.784101		0.888032
0.718133		0.798115
0.853875		0.817178
0.54283		0.652931
0.739548		0.708855
0.233253		0.308428
0.317877		0.78422
0.621946		0.568847
0.604311		0.681783
0.478037		0.683112
0.672709		0.852849
0.696224		0.908574
0.50079		0.768234
0.525869		0.712266
0.745368		0.810026
0.561152		0.522572
0.776667		0.359416
0.313387		0.544154
0.482032		0.509296
0.494558		0.584978
0.227376		0.411962
0.463462		0.451151
0.561642		0.869466
0.676585		0.782296
0.575554		0.605463
0.676479		0.562014
0.772922		0.761902
0.379566		0.500172
0.391999		0.217138
0.320531		0.707875
0.501646		0.776003
0.596392		0.311151
0.786072		0.848736
0.651358		0.735302
0.254604		0.309132
0.310002		0.484284
0.585527		0.903317
0.288222		0.775324
0.663381		0.295433
0.36419		0.566706
0.65452		0.658555
0.658016		0.290255
0.578388		0.50652
0.376942		0.669328
0.671483		0.843332
0.532465		0.941467
0.669618		0.823685
0.485584		0.76686
0.501817		0.638253
0.6923		0.841876
0.665852		0.52307
0.836663		0.811258
0.736339		0.60657
0.796134		0.597768
0.23474		0.325449
0.537688		0.878786
0.416986		0.592887
0.355403		0.635042
0.429739		0.579286
0.451281		0.605604
0.732724		0.91501
0.423532		0.633837
0.911466		0.821138
0.365962		0.789205
0.72726		0.865183
0.714044		0.829635
0.362915		0.632479
0.828692		0.813746
0.477614		0.947342
0.70408		0.840323
0.884632		0.75427
0.178134		0.929557
0.862555		0.691045
0.798008		0.726564
0.76697		0.753079
0.651214		0.862622
0.632875		0.884758
0.474583		0.528896
0.848041		0.259663
0.612154		0.649783
0.60669		0.870874
0.621728		0.712089
0.397221		0.677641
0.524351		0.677486
0.727868		0.321568
0.451463		0.671592
0.332494		0.871369
0.486016		0.633154
0.6453		0.844677
0.485974		0.535064
0.398767		0.528015
0.668543		0.646196
0.28419		0.562106
0.615885		0.795022
0.598729		0.735356
0.538312		0.324583
0.230271		0.715565
0.258999		0.631472
0.375188		0.679856
0.802817		0.67056
0.48289		0.588457
0.549984		0.784929
0.754939		0.669542
0.575133		0.369321
0.891619		0.368084
0.234247		0.510638
0.600838		0.702559
0.580881		0.713918
0.735937		0.723583
0.874781		0.353939
0.637787		0.756992
0.846958		0.888062
0.250429		0.757706
0.623441		0.908846
0.57047		0.518791
0.628172		0.786112
0.862973		0.565643
0.729209		0.874933
0.343774		0.43851
0.685564		0.59008
0.326235		0.847102
0.835022		0.808239
0.883346		0.491026
0.594801		0.802533
0.566787		0.804751
0.535681		0.802017
0.494987		0.8612
0.434395		0.695305
0.444705		0.702497
0.893292		0.785527
0.605134		0.69994
0.57165		0.889918
0.621984		0.768547
0.183267		0.73843
0.59616		0.878873
0.642577		0.800982
0.796877		0.691707
0.497372		0.645765
0.462864		0.929391
0.705674		0.840589
0.51705		0.914746
0.71319		0.563499
0.609562		0.751164
0.682162		0.735781
0.459816		0.646387
0.65059		0.901588
0.641845		0.723525
0.866255		0.863659
0.538452		0.574758
0.69363		0.793808
0.782323		0.836326
0.574964		0.853695
0.389119		0.941648
0.348204		0.702954
0.779831		0.576862
0.411726		0.835292
0.7328		0.729215
0.693559		0.849976
0.435158		0.557191
0.418175		0.706682
0.894859		0.830521
0.457818		0.809864
0.524851		0.608652
0.325232		0.415429
0.752925		0.643262
0.473614		0.633155
0.520884		0.782307
0.827584		0.736283
0.635456		0.86358
0.654779		0.728203
0.383419		0.871535
0.292372		0.949261
0.27692		0.567798
0.4767		0.818126
0.699567		0.880991
0.237634		0.521164
0.699781		0.34765
0.694999		0.64477
0.828057		0.33974
0.63032		0.617724
0.365213		0.747041
0.728802		0.765438
0.441774		0.807404
0.863309		0.876055
0.820825		0.686943
0.754723		0.845572
0.50224		0.755652
0.604761		0.724017
0.91505		0.735689
0.623723		0.879427
0.906264		0.622782
0.390561		0.897931
0.49422		0.700374
0.612897		0.789917
0.556762		0.852801
0.599517		0.668432
0.715931		0.873704
0.702411		0.59569
0.58824		0.574912
0.592745		0.808638
0.392687		0.806927
0.622459		0.81077
0.609788		0.792433
0.664039		0.90492
0.465746		0.597354
0.670846		0.671952
0.546624		0.689009
0.318854		0.716651
0.647832		0.838521
0.573353		0.559422
0.558771		0.915553
0.691067		0.523023
0.239711		0.734318
0.697873		0.598977
0.66771		0.368602
0.233416		0.698213
0.62667		0.84594
0.483094		0.799416
0.195603		0.595684
0.588738		0.883484
0.487199		0.677975
0.660318		0.592907
0.468583		0.866204
0.627114		0.752721
0.610948		0.612205
0.18514		0.614507
0.719786		0.73767
0.764818		0.715813
0.643363		0.674912
0.607899		0.93032
0.716431		0.680671
0.377055		0.85669
0.377115		0.938464
0.633647		0.516027
0.201673		0.619702
0.56592		0.587023
0.40778		0.597458
0.197771		0.959604
0.891341		0.568335
0.276205		0.590577
0.225875		0.578675
0.784944		0.769981
0.574029		0.779138
0.423952		0.871038
0.5264		0.795878
0.599284		0.800753
0.704755		0.638324
0.559267		0.89043
0.581761		0.648905
0.514806		0.756288
0.631855		0.193415
0.570217		0.921627
0.412014		0.94881
0.24051		0.85445
0.249986		0.711609
0.422019		0.792513
0.541872		0.571235
0.77965		0.802962
0.325916		0.463131
0.580373		0.64127
0.570791		0.557028
0.516574		0.848536
0.53687		0.823568
0.60661		0.796893
0.246913		0.913333
0.678574		0.425047
0.322539		0.341657
0.836999		0.814683
0.299163		0.660873
0.550581		0.771708
0.552953		0.81171
0.566018		0.66488
0.310724		0.76892
0.787824		0.877648
0.700536		0.789357
0.355611		0.262073
0.425659		0.581941
0.514489		0.540849
0.17505		0.753866
0.683476		0.849442
0.85461		0.753886
0.74685		0.402424
0.586993		0.626404
0.569604		0.541456
0.721667		0.797741
0.604156		0.620012
0.774432		0.824028
0.624168		0.732862
0.31254		0.899082
0.696216		0.839751
0.790613		0.661435
0.49682		0.681113
0.523218		0.509731
0.268827		0.756246
0.77434		0.804047
0.220095		0.954754
0.35101		0.777629
0.643835		0.696393
0.44967		0.862635
0.580866		0.743031
0.422539		0.838937
0.795697		0.334894
0.534686		0.850048
0.627185		0.687243
0.573537		0.79483
0.574289		0.67701
0.581479		0.955938
0.614855		0.8852
0.722449		0.656373
0.446073		0.775955
0.575674		0.733476
0.689669		0.663507
0.395397		0.929986
0.707965		0.299827
0.640894		0.585595
0.721088		0.757389
0.404388		0.712986
0.562906		0.810288
0.58741		0.551098
0.400774		0.761941
0.755356		0.871114
0.53835		0.709494
0.44796		0.779577
0.647553		0.759448
0.65544		0.706058
0.447374		0.795759
0.636254		0.855674
0.76917		0.872514
0.679368		0.614426
0.602004		0.53124
0.565338		0.652791
0.81293		0.747212
0.832714		0.825232
0.853356		0.856615
0.703429		0.856385
0.659791		0.86202
0.87202		0.369453
0.627549		0.623828
0.672487		0.789994
0.761905		0.830965
0.659297		0.646768
0.811316		0.814926
0.66826		0.691324
0.342519		0.323256
0.577234		0.756882
0.4561		0.350669
0.758399		0.724638
0.733543		0.618284
0.844141		0.676803
0.245043		0.696662
0.652023		0.884943
0.73275		0.588315
0.858792		0.837804
0.474221		0.711612
0.707136		0.657577
0.314497		0.606737
0.752654		0.706715
0.718039		0.923661
0.597679		0.679011
0.557455		0.767436
0.7623		0.697195
0.833118		0.838876
0.576569		0.45225
0.800136		0.820781
0.635244		0.510809
0.85867		0.708148
0.719316		0.699977
0.864235		0.730123
0.365857		0.564333
0.535784		0.693242
0.65417		0.545449
0.634826		0.864838
0.548886		0.6301
0.387774		0.692654
0.410508		0.865647
0.644573		0.503098
0.841412		0.554289
0.615318		0.795999
0.501564		0.789419
0.621868		0.914274
0.551837		0.704306
0.244543		0.309444
0.60811		0.631054
0.411115		0.782758
0.36986		0.583174
0.872421		0.771186
0.365806		0.726846
0.870069		0.398855
0.445863		0.868551
0.589303		0.868433
0.626956		0.869111
0.701824		0.721745
0.633871		0.438823
0.728869		0.896334
0.721655		0.593823
0.420043		0.886556
0.616733		0.934281
0.789887		0.485402
0.454531		0.777413
0.374171		0.802156
0.5947		0.897062
0.613066		0.574695
0.587892		0.791824
0.776909		0.900034
0.78357		0.34539
0.819025		0.9246
0.409452		0.834796
0.812087		0.525221
0.777391		0.935356
0.330713		0.485798
0.271514		0.604369
0.675254		0.747901
0.864589		0.394942
0.590794		0.442192
0.458334		0.754725
0.228715		0.815677
0.188224		0.633405
0.871269		0.532311
0.808524		0.615988
0.7546		0.511762
0.258078		0.281459
0.688544		0.766607
0.809797		0.774234
0.894015		0.518781
0.516742		0.759189
0.821136		0.698237
0.682426		0.714828
0.588824		0.875564
0.442702		0.796072
0.623305		0.677064
0.889088		0.807166
0.828663		0.602541
0.667604		0.837784
0.75358		0.810716
0.435445		0.825482
0.534774		0.560862
0.542722		0.499809
0.567661		0.79805
0.837163		0.762156
0.507214		0.612287
0.803217		0.922426
0.639341		0.404136
0.522705		0.429545
0.686471		0.829995
0.766219		0.535433
0.616688		0.84758
0.618176		0.624446
0.81856		0.833832
0.467866		0.813296
0.258027		0.724493
0.742648		0.852345
0.425652		0.772201
0.458307		0.578697
0.818772		0.675757
0.32212		0.783834
0.330245		0.721221
0.639398		0.707985
0.513885		0.712872
0.319862		0.689102
0.712445		0.655988
0.251132		0.583134
0.253259		0.586472
0.246557		0.678756
0.759501		0.388058
0.901488		0.863371
0.61989		0.396192
0.483888		0.751406
0.641494		0.638496
0.251793		0.794052
0.708189		0.632524
0.652891		0.789088
0.839378		0.739909
0.763805		0.719772
0.534663		0.386877
0.878516		0.86132
0.749009		0.832129
0.736008		0.616655
0.608176		0.87491
0.946491		0.85333
0.431756		0.685885
0.833737		0.851739
0.915144		0.774305
0.596548		0.725713
0.692787		0.887355
0.570364		0.76494
0.900066		0.876776
0.419033		0.779766
0.216962		0.54364
0.485363		0.787706
0.184332		0.868
0.682237		0.493083
0.25911		0.863004
0.552657		0.622482
		0.862734
		0.754716
		0.805484
		0.230426
		0.646089
		0.316187
		0.540706
		0.839781
		0.809087
		0.507697
		0.795042
		0.884994
		0.810659
		0.659054
		0.370698
		0.900004
		0.643413
		0.770961
		0.889212
		0.737233
		0.47488
		0.487086
		0.799781
		0.898991
		0.748623
		0.733468
		0.365985
		0.576826
		0.95525
		0.913165
		0.928128
		0.632193
		0.95249
		0.55865
		0.247914
		0.334316
		0.537186
		0.886003
		0.683085
		0.858422
		0.545258
		0.572698
		0.507456
		0.809883
		0.809186
		0.817068
		0.586599
		0.412458
		0.80002
		0.631031
		0.480356
		0.682025
		0.8648
		0.908794
		0.782979
		0.464059
		0.895492
		0.849174
		0.885947
		0.77827
		0.695186
		0.737631
		0.828324
		0.770435
		0.837086
		0.858171
		0.940586
		0.408397
		0.627475
		0.662239
		0.749277
		0.58172
		0.602506
		0.866266
		0.346624
		0.894888
		0.906657
		0.738335
		0.945066
		0.849225
		0.4821
		0.753921
		0.878084
		0.802367
		0.661795
		0.594805
		0.835175
		0.755952
		0.793842
		0.57098
		0.51107
		0.757421
		0.603052
		0.647634
		0.743276
		0.588693
		0.272241
		0.90208
		0.655273
		0.527642
		0.780696
		0.612472
		0.752217
		0.599273
		0.251621
		0.777427
		0.69423
		0.716243
		0.473812
		0.697985
		0.822919
		0.902352
		0.554483
		0.775577
		0.725616
		0.625888
		0.408683
		0.841429
		0.752437
		0.598761
		0.739742
		0.46441
		0.592259
		0.387742
		0.419334
		0.791519
		0.788574
		0.658798
		0.681626
		0.926182
		0.395588
		0.565828
		0.42187
		0.526967
		0.515647
		0.421769
		0.624026
		0.765707
		0.718433
		0.628462
		0.550401
		0.828307
		0.663401
		0.852975
		0.498311
		0.851146
		0.923884
		0.621744
		0.613355
		0.886158
		0.435239
		0.890198
		0.614129
		0.587261
		0.848907
		0.643903
		0.635033
		0.902164
		0.466103
		0.607244
		0.330951
		0.344523
		0.789214
		0.901925
		0.842862
		0.801976
		0.611029
		0.807009
		0.870999
		0.282896
		0.45204
		0.647224
		0.688592
		0.880562
		0.812461
		0.739067
		0.88384
		0.540886
		0.866606
		0.838457
		0.605926
		0.888239
		0.499795
		0.923771
		0.862183
		0.804621
		0.704401
		0.607129
		0.827894
		0.952563
		0.40705
		0.590933
		0.327997
		0.908738
		0.729609
		0.732119
		0.81001
		0.933332
		0.450428
		0.646773
		0.813949
		0.746404
		0.759163
		0.764165
		0.66749
		0.799304
		0.684379
		0.18315
		0.930916
		0.76578
		0.881167
		0.548601
		0.93313
		0.618461
		0.812146
		0.746554
		0.930007
		0.613136
		0.791905
		0.547166
		0.914613
		0.722706
		0.698326
		0.950256
		0.672345
		0.800499
		0.619083
		0.852177
		0.760256
		0.506636
		0.89588
		0.916775
		0.840937
		0.87216
		0.514829
		0.917201
		0.925826
		0.646421
		0.77927
		0.918869
		0.685658
		0.596368
		0.821027
		0.190868
		0.604496
		0.929756
		0.63213
		0.534566
		0.757155
		0.745068
		0.898588
		0.766074
		0.324284
		0.680361
		0.820491
		0.887695
		0.811223
		0.860709
		0.642705
		0.667273
		0.882906
		0.565242
		0.765159
		0.845197
		0.621505
		0.876804
		0.667191
		0.758896
		0.677075
		0.362584
		0.907112
		0.828391
		0.376232
		0.725497
		0.525667
		0.860959
		0.761222
		0.891692
		0.449201
		0.733267
		0.643692
		0.951232
		0.61974
		0.552625
		0.703911
		0.80191
		0.858298
		0.881434
		0.575306
		0.818827
		0.722906
		0.847665
		0.641443
		0.552944
		0.805261
		0.915658
		0.289802
		0.805063
		0.837425
		0.724123
		0.830659
		0.829511
		0.739794
		0.957473
		0.193058
		0.852689
		0.354103
		0.572529
		0.839409
		0.912626
		0.752131
		0.67142
		0.857001
		0.783323
		0.758218
		0.920562
		0.223534
		0.453549
		0.455391
		0.737561
		0.826296
		0.59658
		0.923194
		0.897801
		0.846373
		0.647303
		0.516639
		0.397113
		0.746704
		0.810251
		0.913357
		0.810576
		0.766048
		0.583205
		0.506147
		0.468081
		0.647601
		0.632781
		0.741787
		0.649453
		0.451584
		0.695898
		0.357281
		0.933358
		0.788963
		0.823095
		0.910313
		0.629112
		0.812558
		0.714048
		0.542861
[truncated: 709 more rows]

## Sheet: Figure 2F
Veh	Veh + ISRIB	Tg	Tg + ISRIB	HF	HF + ISRIB	0357	0357 + ISRIB	3610	3610 + ISRIB
1.00542	1.06105	1.83599	1.08113	1.99407	1.00705	1.77769	0.971107	1.85989	0.983505
1.05821	1.09728	1.91075	1.12125	2.15839	1.16514	1.98203	1.11534	1.87355	1.00349
1.07375	1.09782	1.91514	1.13289	2.19087	1.16903	2.01741	1.12375	1.91469	1.02436
1.09381	1.11935	1.96147	1.15665	2.24426	1.21266	2.06616	1.12389	1.94466	1.04484
1.11173	1.12808	2.05764	1.15678	2.2551	1.21439	2.07502	1.1618	1.95148	1.05986
1.12473	1.1302	2.11491	1.16655	2.28792	1.23121	2.09065	1.18427	1.97427	1.06268
1.13864	1.13322	2.1249	1.17493	2.30388	1.25763	2.09208	1.20527	2.01342	1.10148
1.14036	1.15063	2.16067	1.17504	2.36232	1.26964	2.11689	1.2111	2.02709	1.11241
1.14474	1.18706	2.16666	1.17531	2.43044	1.32338	2.14741	1.21554	2.06143	1.11435
1.1489	1.19707	2.20681	1.19279	2.46694	1.34521	2.15278	1.22133	2.12266	1.1207
1.16761	1.1972	2.20977	1.19613	2.5344	1.34725	2.18261	1.23246	2.15864	1.13639
1.17202	1.20932	2.21443	1.19732	2.55312	1.35008	2.19891	1.24641	2.1717	1.14402
1.18076	1.21245	2.21914	1.19968	2.59308	1.35719	2.22031	1.24898	2.17398	1.14807
1.18749	1.22101	2.21926	1.20818	2.65681	1.36755	2.22395	1.24965	2.21182	1.1486
1.19119	1.23132	2.25014	1.21843	2.6802	1.37115	2.22678	1.26041	2.21722	1.18236
1.19278	1.23621	2.25309	1.21944	2.70871	1.37587	2.26148	1.26438	2.22115	1.18611
1.19365	1.24906	2.26254	1.22023	2.71564	1.38571	2.26591	1.27727	2.23834	1.18975
1.19962	1.25158	2.27514	1.22402	2.72476	1.38606	2.26947	1.28141	2.24188	1.19565
1.20174	1.25702	2.29907	1.22884	2.77422	1.38991	2.27107	1.28592	2.25591	1.19827
1.20328	1.25881	2.30077	1.2294	2.78212	1.40235	2.29179	1.29678	2.27781	1.20056
1.20809	1.26564	2.30678	1.24194	2.78727	1.43418	2.3014	1.29836	2.27802	1.20464
1.21269	1.26958	2.30732	1.24868	2.79334	1.44962	2.31972	1.30774	2.28035	1.20627
1.22516	1.27453	2.31895	1.24916	2.89623	1.45216	2.33358	1.30774	2.28178	1.21299
1.22558	1.27564	2.32455	1.25969	2.90796	1.45893	2.35552	1.30799	2.29256	1.22007
1.22975	1.28062	2.32551	1.26125	2.91294	1.45946	2.36894	1.31183	2.29359	1.22183
1.23137	1.28842	2.35471	1.2665	2.92579	1.46063	2.36945	1.31327	2.29591	1.22842
1.24097	1.28986	2.35783	1.27311	2.9275	1.46763	2.37037	1.32354	2.30968	1.23157
1.24995	1.3014	2.40701	1.27562	2.95452	1.48038	2.40774	1.32698	2.31961	1.23181
1.25072	1.31983	2.41654	1.28111	2.96023	1.50412	2.42556	1.32902	2.32046	1.23186
1.25137	1.32516	2.43164	1.28166	2.9893	1.50599	2.42757	1.32959	2.32674	1.23338
1.25528	1.32613	2.44041	1.28911	3.00251	1.51288	2.4278	1.33542	2.32988	1.23902
1.25729	1.33875	2.44116	1.29884	3.05157	1.51499	2.45344	1.33717	2.33258	1.24057
1.26013	1.34175	2.45403	1.30626	3.05317	1.53499	2.45647	1.33826	2.34216	1.24697
1.26274	1.34869	2.45763	1.31079	3.07748	1.55333	2.47316	1.34815	2.34406	1.25123
1.27555	1.35788	2.45839	1.32077	3.07914	1.56385	2.48387	1.35989	2.35136	1.26174
1.27575	1.35815	2.45912	1.32126	3.08112	1.5867	2.52247	1.36062	2.35601	1.26559
1.28025	1.36956	2.45978	1.32819	3.0875	1.59906	2.53122	1.36135	2.35894	1.26594
1.28933	1.37133	2.47095	1.33066	3.09912	1.60349	2.55025	1.36184	2.3763	1.26719
1.29143	1.37808	2.47921	1.33072	3.1062	1.60373	2.56749	1.36332	2.37836	1.2676
1.29207	1.3889	2.48689	1.33539	3.12687	1.60774	2.58151	1.36408	2.40711	1.26926
1.29758	1.39315	2.5089	1.33672	3.13828	1.60813	2.59986	1.36478	2.40899	1.27258
1.31416	1.39338	2.52029	1.34426	3.14915	1.60829	2.60025	1.36579	2.41222	1.27303
1.31456	1.39933	2.52266	1.3484	3.16386	1.60888	2.60983	1.36735	2.43828	1.27425
1.3313	1.40961	2.54358	1.3497	3.17785	1.61879	2.61694	1.37279	2.45394	1.29867
1.33298	1.44819	2.55832	1.35025	3.18885	1.64118	2.62377	1.37284	2.46703	1.30132
1.33758	1.44929	2.56003	1.35373	3.2317	1.64672	2.636	1.3769	2.49179	1.30977
1.33837	1.45094	2.56068	1.35399	3.24566	1.67056	2.65623	1.37984	2.49744	1.31074
1.33863	1.45952	2.57667	1.35686	3.248	1.68066	2.661	1.38007	2.501	1.31986
1.34147	1.46259	2.58128	1.36281	3.25925	1.68317	2.66384	1.38014	2.5053	1.32026
1.34517	1.46684	2.59168	1.36395	3.27368	1.69994	2.69853	1.38227	2.50793	1.32058
1.3456	1.47269	2.59271	1.36556	3.32954	1.70398	2.70098	1.38365	2.50946	1.33022
1.35957	1.47955	2.59428	1.36661	3.34146	1.70453	2.70171	1.38585	2.51187	1.33031
1.366	1.48211	2.59498	1.36751	3.37626	1.70966	2.71023	1.39658	2.51302	1.33356
1.36905	1.48905	2.63425	1.37025	3.38947	1.71095	2.71119	1.41566	2.53301	1.3353
1.37118	1.49128	2.64454	1.37034	3.40476	1.71712	2.71552	1.41657	2.53963	1.33645
1.37144	1.49362	2.65675	1.37261	3.44667	1.71937	2.72098	1.41692	2.56371	1.34094
1.37955	1.49454	2.66244	1.37373	3.44942	1.73165	2.7422	1.4171	2.57387	1.3427
1.37977	1.49526	2.66479	1.3852	3.45664	1.73599	2.75094	1.42598	2.57559	1.34406
1.37981	1.5022	2.67241	1.3884	3.52332	1.73762	2.7641	1.42859	2.58146	1.3456
1.38296	1.50452	2.70102	1.38844	3.55787	1.7418	2.76989	1.42938	2.59732	1.34592
1.38803	1.52097	2.70441	1.39635	3.56079	1.7452	2.78698	1.43069	2.59801	1.34893
1.38878	1.52435	2.75161	1.40778	3.58793	1.7516	2.78815	1.43152	2.59864	1.35294
1.39008	1.52455	2.75477	1.40804	3.59579	1.77112	2.78936	1.43482	2.62604	1.35792
1.39041	1.52731	2.77162	1.41009	3.6382	1.77169	2.80307	1.43541	2.62778	1.35885
1.39438	1.52834	2.7801	1.41106	3.63828	1.77239	2.80687	1.43673	2.62992	1.36235
1.39571	1.53878	2.78502	1.4156	3.64943	1.77267	2.8171	1.43857	2.63207	1.36622
1.39723	1.54451	2.78807	1.41899	3.65726	1.78246	2.8257	1.43956	2.63403	1.36867
1.39907	1.55523	2.79214	1.42141	3.6685	1.78436	2.82591	1.44507	2.6375	1.36903
1.40012	1.5573	2.79281	1.42888	3.70618	1.80056	2.83058	1.44861	2.63865	1.37166
1.40236	1.56019	2.81178	1.429	3.72521	1.80182	2.83366	1.45427	2.64081	1.37449
1.40281	1.56079	2.81372	1.42928	3.73806	1.81204	2.84879	1.45814	2.6451	1.38142
1.40906	1.56317	2.83255	1.43097	3.75509	1.82326	2.86406	1.46571	2.65007	1.3816
1.41195	1.5646	2.8568	1.43189	3.77368	1.83281	2.87148	1.46723	2.66104	1.38496
1.41334	1.56656	2.85979	1.4341	3.79163	1.84348	2.87569	1.47243	2.66756	1.39034
1.41489	1.56664	2.86124	1.43589	3.82759	1.86078	2.88768	1.473	2.67137	1.39483
1.41887	1.58637	2.87604	1.44477	3.86381	1.86653	2.89312	1.475	2.68526	1.39608
1.42188	1.58692	2.89978	1.44511	3.87212	1.87053	2.91222	1.47508	2.68652	1.39801
1.42345	1.59278	2.90388	1.44548	3.8903	1.87119	2.92342	1.47535	2.69594	1.40612
1.42573	1.59317	2.91122	1.45446	3.89427	1.87131	2.93996	1.47603	2.70146	1.4147
1.42591	1.59587	2.91222	1.45552	3.91594	1.87813	2.94288	1.47871	2.70892	1.41537
1.42613	1.59684	2.91383	1.45621	3.93042	1.88579	2.95187	1.4815	2.71061	1.4156
1.42766	1.59724	2.91607	1.45843	3.94413	1.89856	2.95284	1.48548	2.7109	1.41631
1.42861	1.61909	2.92156	1.46489	3.95981	1.91467	2.96956	1.48563	2.71178	1.41858
1.42893	1.62721	2.92875	1.46569	3.98397	1.91495	2.97602	1.48851	2.71608	1.42144
1.43409	1.63239	2.9404	1.46997	4.00825	1.91562	2.98237	1.49075	2.72812	1.4218
1.43492	1.63697	2.94422	1.47323	4.02406	1.92635	2.9855	1.49545	2.74376	1.42336
1.43583	1.64756	2.94608	1.47569	4.03447	1.93399	3.00868	1.49597	2.75618	1.42498
1.43594	1.65309	2.95921	1.47731	4.03884	1.94233	3.0139	1.50839	2.76638	1.42552
1.43881	1.65784	2.95959	1.48089	4.05029	1.94371	3.0232	1.51082	2.77406	1.42684
1.43956	1.66087	2.96532	1.48215	4.05825	1.94563	3.0344	1.5109	2.77438	1.42797
1.4409	1.66826	2.97056	1.48494	4.06564	1.96033	3.05183	1.51276	2.7778	1.42851
1.44373	1.6745	2.97836	1.48542	4.07806	1.96642	3.06275	1.51314	2.78251	1.43208
1.44501	1.68299	2.98222	1.48587	4.07819	1.97328	3.06669	1.52261	2.79062	1.43637
1.44971	1.68456	2.98788	1.4904	4.08041	1.97909	3.08855	1.5228	2.79403	1.44693
1.45157	1.68879	3.01199	1.49869	4.08308	1.99247	3.12282	1.5245	2.79935	1.44762
1.4517	1.69616	3.01366	1.50774	4.11115	1.99734	3.13751	1.52616	2.80339	1.44991
1.45378	1.69952	3.0155	1.50969	4.13561	2.01517	3.14104	1.53016	2.80558	1.45149
1.45442	1.70064	3.02744	1.52102	4.15959	2.02568	3.14318	1.53039	2.81157	1.45335
1.45531	1.70361	3.0396	1.52135	4.1636	2.03968	3.14923	1.53697	2.83278	1.45827
1.45828	1.70684	3.04277	1.52958	4.18064	2.04136	3.16071	1.54159	2.84127	1.45963
1.46328	1.70738	3.04797	1.53161	4.2346	2.04977	3.16615	1.54283	2.84735	1.46117
1.46347	1.71187	3.05163	1.53313	4.24388	2.07154	3.17338	1.548	2.84878	1.4637
1.4639	1.71402	3.06222	1.54929	4.28489	2.08886	3.17937	1.55025	2.88945	1.46441
1.46674	1.71426	3.06628	1.55416	4.2875	2.09644	3.18095	1.55145	2.89127	1.46554
1.46713	1.71525	3.06915	1.55731	4.32591	2.09728	3.18597	1.55785	2.89942	1.46953
1.46812	1.7173	3.11343	1.55899	4.33429	2.1171	3.19432	1.56056	2.92069	1.47121
1.46842	1.71965	3.1252	1.55944	4.33916	2.1186	3.20892	1.56231	2.92248	1.47134
1.46991	1.72043	3.12812	1.56074	4.4046	2.11937	3.21058	1.5635	2.92478	1.47449
1.47232	1.73106	3.1353	1.56245	4.42804	2.12072	3.21246	1.5653	2.933	1.4788
1.47557	1.73363	3.14604	1.56258	4.46077	2.12102	3.21295	1.56915	2.93911	1.47971
1.47601	1.73964	3.14938	1.56306	4.46901	2.12224	3.22589	1.57214	2.93912	1.48717
1.47601	1.74181	3.17913	1.56723	4.47971	2.14349	3.23405	1.573	2.94374	1.48886
1.47706	1.74202	3.20463	1.56794	4.48438	2.14531	3.24001	1.57921	2.94586	1.48912
1.48058	1.74437	3.21954	1.56846	4.49243	2.16145	3.24914	1.58052	2.94669	1.49154
1.48105	1.75094	3.2583	1.57021	4.5104	2.18204	3.25923	1.58173	2.94756	1.49302
1.48159	1.7518	3.25895	1.57421	4.51561	2.18478	3.27037	1.5835	2.95003	1.4934
1.49299	1.75561	3.2601	1.57681	4.5429	2.18819	3.27693	1.58358	2.95588	1.494
1.49388	1.75703	3.26821	1.5769	4.55296	2.21927	3.32331	1.59307	2.95806	1.4979
1.4992	1.76038	3.27319	1.5795	4.58814	2.22765	3.33638	1.59716	2.95971	1.49953
1.50508	1.76099	3.27376	1.58504	4.59863	2.22907	3.3551	1.59743	2.96106	1.50071
1.50622	1.76286	3.27963	1.59373	4.60822	2.24437	3.35668	1.59842	2.96297	1.50497
1.5099	1.77274	3.28334	1.59505	4.62614	2.25365	3.35905	1.59913	2.96875	1.50659
1.51069	1.78188	3.28969	1.59642	4.63077	2.26391	3.36361	1.60097	2.97825	1.50719
1.51175	1.78504	3.29373	1.60349	4.65025	2.26507	3.37634	1.60116	2.98873	1.5079
1.51189	1.79204	3.30016	1.60564	4.6745	2.26786	3.38419	1.60788	3.00183	1.5164
1.51252	1.7938	3.31761	1.6073	4.69159	2.27197	3.39596	1.61034	3.00468	1.51866
1.51373	1.79555	3.34029	1.60784	4.77138	2.27298	3.4203	1.61082	3.00521	1.51921
1.51471	1.79852	3.35205	1.61127	4.80877	2.28048	3.43469	1.61106	3.00894	1.52088
1.52087	1.79938	3.35389	1.61714	4.84096	2.28334	3.43667	1.61166	3.01859	1.5209
1.52422	1.80326	3.35656	1.61846	4.84503	2.28542	3.45314	1.6117	3.01984	1.52647
1.52461	1.80574	3.38683	1.62174	4.84516	2.28564	3.45962	1.61906	3.0201	1.52713
1.52799	1.80987	3.41256	1.62341	4.8674	2.29076	3.46843	1.61936	3.03059	1.52782
1.53131	1.81306	3.41896	1.62556	4.91196	2.29153	3.47493	1.6238	3.03725	1.52819
1.53552	1.81746	3.42809	1.62648	4.93241	2.29985	3.48876	1.62384	3.03803	1.52889
1.5362	1.81895	3.42901	1.62758	4.95921	2.30078	3.49148	1.62823	3.04465	1.52895
1.53842	1.82255	3.43773	1.63356	4.98946	2.31519	3.50282	1.62995	3.05343	1.52998
1.54087	1.8264	3.44362	1.63476	5.02754	2.32362	3.51158	1.63087	3.06829	1.53038
1.54369	1.82888	3.44752	1.63648	5.0498	2.32878	3.58533	1.63199	3.07286	1.53411
1.54467	1.83617	3.45496	1.64396	5.06564	2.33356	3.58534	1.63362	3.08	1.53551
1.54525	1.86328	3.46194	1.64622	5.0961	2.33968	3.5875	1.63663	3.08097	1.53633
1.55148	1.86359	3.46936	1.65219	5.09975	2.3399	3.5888	1.63816	3.086	1.54456
1.5563	1.86851	3.47932	1.65382	5.12166	2.34075	3.59031	1.63936	3.09593	1.54645
1.55726	1.87322	3.48844	1.65432	5.12757	2.34228	3.59628	1.64029	3.10929	1.54709
1.55792	1.87766	3.49389	1.65486	5.1363	2.34958	3.59844	1.64091	3.11542	1.5583
1.56119	1.87823	3.51969	1.65871	5.18063	2.35307	3.60032	1.64117	3.11597	1.56371
1.5617	1.88681	3.54	1.66027	5.18116	2.36576	3.6031	1.64168	3.11866	1.56478
1.56269	1.88825	3.54185	1.67048	5.19006	2.37379	3.60632	1.64305	3.12109	1.56616
1.56357	1.8916	3.54705	1.67518	5.28294	2.38738	3.62017	1.64364	3.12561	1.56882
1.56876	1.89332	3.55231	1.67775	5.39306	2.38804	3.63085	1.64372	3.12601	1.5717
1.56966	1.89484	3.55374	1.68011	5.40001	2.39298	3.6371	1.64672	3.13373	1.57348
1.56986	1.89527	3.56757	1.68169	5.43411	2.3933	3.65689	1.64898	3.13592	1.57359
1.57057	1.90047	3.56775	1.6866	5.48312	2.39537	3.65767	1.65002	3.14108	1.57449
1.57076	1.9015	3.58948	1.68859	5.50782	2.41306	3.66536	1.65005	3.15387	1.57984
1.57111	1.90415	3.59507	1.69083	5.50917	2.4138	3.68718	1.6512	3.16794	1.57993
1.57221	1.905	3.60522	1.69455	5.50957	2.42697	3.69734	1.652	3.16956	1.58027
1.57257	1.90958	3.6258	1.69476	5.62609	2.43831	3.7146	1.65275	3.17158	1.5807
1.57268	1.9116	3.62966	1.69878	5.68576	2.45951	3.71606	1.65308	3.1775	1.58229
1.57329	1.91402	3.63311	1.69972	5.75017	2.48228	3.71942	1.65427	3.18137	1.5826
1.57332	1.91796	3.66408	1.70271	5.75107	2.48273	3.72272	1.65575	3.18348	1.58313
1.57595	1.91848	3.66666	1.70567	5.88132	2.48883	3.72491	1.65683	3.18834	1.58379
1.5844	1.93204	3.67453	1.71052	5.89801	2.4903	3.75596	1.66472	3.1948	1.5852
1.58521	1.93329	3.67583	1.71108	5.95375	2.4944	3.77072	1.66608	3.20098	1.58554
1.58574	1.93346	3.67587	1.71329	6.08373	2.50435	3.77072	1.66614	3.20986	1.58649
1.58855	1.93373	3.688	1.71384	6.11437	2.51052	3.77805	1.66666	3.23088	1.59089
1.59083	1.94035	3.74062	1.7142	6.18603	2.51155	3.79297	1.66815	3.23557	1.59689
1.59549	1.94075	3.75019	1.71502	6.27326	2.52284	3.82452	1.66911	3.23783	1.59743
1.60124	1.94115	3.77494	1.71804	6.31643	2.52471	3.83571	1.66949	3.24182	1.60023
1.60232	1.94489	3.77867	1.71932	6.32537	2.52549	3.83733	1.67003	3.24592	1.60232
1.60293	1.94514	3.78695	1.72566	6.40549	2.52557	3.83822	1.67032	3.25016	1.60232
1.60563	1.94926	3.79112	1.72614	6.41319	2.52796	3.8651	1.67094	3.29167	1.60595
1.60708	1.96482	3.81142	1.72721	6.44401	2.57496	3.8852	1.67201	3.29408	1.61031
1.60715	1.9657	3.82637	1.73075	6.55676	2.58652	3.89209	1.67238	3.29417	1.61045
1.60802	1.96879	3.84128	1.73557	6.57004	2.58786	3.89893	1.67287	3.31684	1.61102
1.60817	1.9742	3.84344	1.73756	6.61052	2.58939	3.91379	1.67297	3.32721	1.61238
1.61094	1.97507	3.8537	1.74076	6.62807	2.5898	3.9151	1.67343	3.33437	1.61459
1.61506	1.97837	3.86725	1.74523	6.68864	2.59393	3.91693	1.67502	3.33469	1.61623
1.6162	1.98696	3.87472	1.75411	6.72614	2.6017	3.92262	1.67595	3.33613	1.6164
1.6181	1.99007	3.90536	1.75847	6.75108	2.60319	3.93262	1.67849	3.33823	1.61834
1.6184	1.99231	3.90552	1.75941	6.84423	2.60704	3.93484	1.68488	3.34999	1.61912
1.62127	1.99394	3.93269	1.76071	6.84602	2.60934	3.9432	1.68665	3.35281	1.62086
1.62226	1.99673	3.93409	1.7631	6.84689	2.61427	3.96701	1.68703	3.37592	1.62205
1.6238	2.00006	3.93457	1.76445	6.86047	2.62784	3.97429	1.68733	3.37764	1.6242
1.62575	2.00923	3.93649	1.76607	6.91742	2.63477	3.98119	1.68734	3.38094	1.62522
1.62691	2.01655	3.9365	1.76659	6.9659	2.63945	3.98598	1.69154	3.4052	1.62548
1.62774	2.01879	3.94983	1.76884	6.99268	2.65475	3.98995	1.69256	3.41384	1.6257
1.62864	2.02074	3.96052	1.77079	7.0191	2.66036	3.99268	1.69268	3.41494	1.62681
1.62973	2.0221	3.9745	1.77199	7.05195	2.68468	4.00859	1.69464	3.42465	1.63019
1.63068	2.03064	3.9888	1.77864	7.06843	2.69581	4.01397	1.69609	3.42937	1.6391
1.63322	2.03538	3.99549	1.77969	7.07953	2.696	4.03368	1.70015	3.42945	1.64105
1.63622	2.03698	4.02847	1.78252	7.30102	2.71773	4.04156	1.70069	3.43356	1.64352
1.63757	2.03865	4.04091	1.78324	7.33095	2.72621	4.05662	1.70175	3.43834	1.6456
1.64233	2.04096	4.04856	1.78351	7.35297	2.73182	4.05972	1.70404	3.4403	1.64577
1.64321	2.04408	4.05626	1.7875	7.36435	2.74151	4.06099	1.70409	3.46926	1.64822
1.64563	2.04633	4.06887	1.7886	7.39576	2.74837	4.07194	1.70469	3.4706	1.64859
1.64887	2.06699	4.08071	1.79604	7.51393	2.75142	4.0744	1.70728	3.47434	1.65173
1.66379	2.06815	4.08356	1.80126	7.52125	2.76457	4.0757	1.70744	3.47469	1.65257
1.66715	2.06999	4.0883	1.80708	7.72217	2.76598	4.12222	1.70821	3.48404	1.65348
1.66967	2.07526	4.11899	1.81023	8.00704	2.77232	4.12246	1.70968	3.49938	1.65788
1.67067	2.07599	4.12398	1.81119	8.01476	2.79138	4.12651	1.71037	3.50883	1.65825
1.67774	2.08604	4.12842	1.81461	8.04002	2.79502	4.1461	1.71584	3.51093	1.65965
1.67924	2.08668	4.13583	1.81751	8.32896	2.80067	4.15213	1.71875	3.51668	1.66577
1.67981	2.08965	4.13815	1.83052	8.40541	2.80091	4.15977	1.72202	3.5176	1.6698
1.68007	2.09181	4.1712	1.8318	8.63499	2.80727	4.18094	1.72305	3.5211	1.67048
1.68303	2.09216	4.17412	1.83393	8.80987	2.82059	4.19096	1.72387	3.52832	1.67226
1.68941	2.09467	4.21066	1.8382	8.87753	2.82982	4.19884	1.72527	3.52845	1.67369
1.69106	2.09541	4.21727	1.8419	8.87888	2.83838	4.20384	1.72656	3.53205	1.67976
1.69135	2.11023	4.21781	1.84337	9.01355	2.83852	4.20449	1.73428	3.53493	1.68017
1.6914	2.11108	4.22522	1.84406	9.01435	2.84164	4.21967	1.7349	3.5353	1.68486
1.69561	2.11549	4.24376	1.84575	9.02797	2.87434	4.22221	1.73545	3.53835	1.68876
1.69795	2.11703	4.2496	1.84629	9.26875	2.87871	4.22679	1.73725	3.54131	1.68999
1.69812	2.12494	4.26733	1.84703	9.43702	2.88783	4.23506	1.74033	3.55522	1.69434
1.6994	2.1345	4.29109	1.84826	9.4497	2.89478	4.24194	1.74233	3.56143	1.70222
1.69945	2.13546	4.29462	1.84993	9.5052	2.91155	4.25059	1.74266	3.56971	1.70394
1.7015	2.13899	4.34753	1.85332	9.71338	2.91815	4.25776	1.74386	3.57017	1.70744
1.70444	2.14083	4.36971	1.85535	9.82226	2.93115	4.26902	1.74547	3.5728	1.71062
1.70679	2.14412	4.39996	1.85743	9.82741	2.93166	4.29793	1.74661	3.57727	1.71492
1.70809	2.14626	4.43218	1.85886	10.0482	2.95543	4.31503	1.7564	3.57909	1.71501
1.70865	2.1494	4.43673	1.86105	10.2657	2.96081	4.31697	1.75641	3.58595	1.71748
1.71218	2.14982	4.45448	1.86174	10.3302	2.96458	4.3242	1.75678	3.60487	1.72466
1.71322	2.15581	4.45786	1.86224	10.3466	2.97557	4.32436	1.75963	3.61577	1.72466
1.71329	2.16212	4.46754	1.86404	10.5558	2.9765	4.326	1.76134	3.62091	1.72478
1.7143	2.16884	4.48048	1.86674	10.9149	3.01484	4.32681	1.76244	3.62617	1.72768
1.71504	2.17419	4.48519	1.87143	10.9281	3.0152	4.32767	1.7629	3.6284	1.73103
1.71761	2.17716	4.49517	1.87198	11.0312	3.06903	4.33237	1.76386	3.6363	1.73347
1.71985	2.17828	4.50193	1.87255	11.3113	3.07594	4.34016	1.76439	3.64	1.73407
1.72197	2.18194	4.509	1.8727	11.3228	3.07666	4.34686	1.76627	3.64931	1.73444
1.72643	2.19871	4.51423	1.87316	11.3534	3.07917	4.35329	1.7673	3.65027	1.7345
1.72879	2.20004	4.53243	1.8742	11.3742	3.08223	4.37006	1.7683	3.65429	1.73513
1.72994	2.20136	4.54245	1.88415	11.5047	3.08531	4.37392	1.77418	3.6567	1.73572
1.7329	2.20216	4.55054	1.88431	11.5948	3.08896	4.37753	1.77606	3.65673	1.73805
1.73494	2.20719	4.56081	1.88548	11.6597	3.12129	4.39194	1.77609	3.6589	1.73876
1.73512	2.20905	4.57438	1.88737	11.8233	3.12241	4.4336	1.77818	3.66156	1.73922
1.74294	2.20948	4.57558	1.89235	11.9093	3.1284	4.43704	1.77885	3.6651	1.74019
1.74315	2.21741	4.58081	1.89329	11.9491	3.12875	4.46787	1.78091	3.67859	1.74184
1.74491	2.22587	4.59048	1.89714	11.9597	3.13339	4.47291	1.78133	3.68782	1.7445
1.74518	2.2269	4.59233	1.89994	12.1597	3.1412	4.48259	1.78188	3.69185	1.74518
1.74763	2.24918	4.61512	1.90096	12.2215	3.14193	4.4966	1.78652	3.69273	1.74641
1.74953	2.25177	4.62021	1.90183	12.2219	3.14635	4.49788	1.78725	3.69853	1.74708
1.75188	2.26381	4.63124	1.90694	12.6972	3.16212	4.5092	1.79029	3.70745	1.74827
1.75233	2.26693	4.63712	1.90862	13.2154	3.17753	4.53992	1.79133	3.71426	1.74845
1.75235	2.28487	4.66229	1.91055	13.2951	3.19556	4.56133	1.79359	3.7208	1.74952
1.7571	2.28761	4.66856	1.91116	13.4399	3.21741	4.5614	1.79747	3.72519	1.75023
1.75751	2.3023	4.68583	1.9129	13.487	3.26525	4.56384	1.79765	3.75765	1.75101
1.76054	2.30265	4.72785	1.91618	13.802	3.27528	4.59151	1.80223	3.76797	1.75354
1.76665	2.30767	4.73182	1.92142	13.9345	3.28192	4.60669	1.80294	3.80511	1.75644
1.76743	2.31673	4.75119	1.9222	14.7984	3.28673	4.62202	1.81315	3.80639	1.75697
1.76951	2.31732	4.75146	1.92582	14.9175	3.28677	4.62783	1.81326	3.8164	1.75721
1.77403	2.31794	4.7537	1.92797	15.2029	3.28759	4.63305	1.81683	3.82627	1.75767
1.77631	2.32147	4.79729	1.92958	15.7304	3.2947	4.63403	1.81709	3.83099	1.75953
1.77707	2.33072	4.81448	1.93105	15.9847	3.29566	4.64661	1.81802	3.83818	1.76071
1.77931	2.33627	4.83785	1.94064	16.285	3.30453	4.6551	1.81908	3.84164	1.76187
1.78094	2.3402	4.86596	1.94265	16.9085	3.30606	4.66362	1.81951	3.85636	1.77448
1.78476	2.34122	4.87741	1.94285	17.1708	3.31018	4.66488	1.82101	3.86192	1.77478
1.78558	2.34139	4.9518	1.94411	17.701	3.31893	4.72298	1.82113	3.86352	1.78433
1.78584	2.34991	4.95206	1.94694	18.5182	3.3404	4.73281	1.82207	3.87765	1.78625
1.78591	2.35823	4.9626	1.94796		3.3494	4.75917	1.82383	3.88535	1.79032
1.78602	2.36289	4.98857	1.94949		3.34987	4.7824	1.82815	3.89679	1.7949
1.78604	2.363	4.99264	1.95075		3.35244	4.82476	1.82935	3.92754	1.79772
1.78665	2.36403	5.01091	1.95082		3.35307	4.86358	1.8305	3.94963	1.79912
1.78853	2.36452	5.01331	1.95087		3.36012	4.87305	1.8333	3.95349	1.80273
1.78976	2.37273	5.01405	1.95139		3.368	4.88206	1.83591	3.96072	1.80626
1.79148	2.38248	5.03946	1.95587		3.38898	4.89959	1.83596	3.96279	1.80802
1.79277	2.39308	5.0419	1.9609		3.38904	4.91663	1.83609	3.96292	1.80878
1.79714	2.39491	5.04439	1.96193		3.3911	4.9268	1.83653	3.96982	1.80924
1.79948	2.39532	5.07402	1.96655		3.39759	4.93269	1.83673	3.97961	1.80932
1.79973	2.39917	5.07623	1.96939		3.4024	4.97636	1.83691	4.00833	1.8098
1.80098	2.41522	5.08748	1.9705		3.40293	4.99785	1.83729	4.02758	1.81449
1.80287	2.4203	5.08988	1.97137		3.41283	4.9997	1.8381	4.03759	1.81464
1.80613	2.42134	5.14157	1.97479		3.41729	5.02492	1.84414	4.03781	1.8152
1.80817	2.42147	5.14636	1.98066		3.4203	5.03598	1.84669	4.04865	1.81738
1.80827	2.42345	5.17797	1.98069		3.45868	5.04578	1.85397	4.06057	1.81817
1.81149	2.42609	5.20551	1.9813		3.46378	5.10758	1.85419	4.06414	1.81892
1.81168	2.42836	5.21387	1.9818		3.46558	5.11656	1.85677	4.06438	1.82173
1.81519	2.42873	5.21899	1.9851		3.47528	5.13399	1.85836	4.07569	1.82183
1.81894	2.439	5.22704	1.98628		3.48474	5.15244	1.8623	4.08804	1.82291
1.81953	2.44162	5.23714	1.99081		3.50444	5.15318	1.86265	4.09007	1.82346
1.8214	2.45299	5.23993	1.99146		3.51134	5.16933	1.86293	4.0914	1.82387
1.82314	2.45349	5.24351	1.99782		3.52557	5.17679	1.87106	4.09574	1.824
1.8234	2.45451	5.26333	1.99945		3.55233	5.27394	1.87153	4.10822	1.82512
1.82644	2.45592	5.30901	2.00742		3.55428	5.32809	1.8729	4.11176	1.82601
1.82708	2.4585	5.31253	2.0078		3.56082	5.32929	1.87582	4.12872	1.82609
1.82969	2.45882	5.31743	2.00823		3.56509	5.35637	1.87599	4.13973	1.82658
1.83321	2.46925	5.319	2.0117		3.56856	5.36697	1.87716	4.14907	1.82895
1.83332	2.4782	5.33413	2.012		3.5716	5.38208	1.87967	4.16418	1.82914
1.83405	2.48639	5.34953	2.01419		3.58946	5.4069	1.88202	4.18855	1.83106
1.83579	2.49594	5.37695	2.01545		3.62189	5.42677	1.88267	4.21478	1.83476
1.83643	2.49777	5.39365	2.02158		3.63198	5.42931	1.88691	4.23528	1.83665
1.84055	2.49953	5.41853	2.02364		3.64919	5.43646	1.88723	4.23693	1.84236
1.84422	2.51466	5.42538	2.02431		3.67262	5.44879	1.9	4.25578	1.84366
1.84438	2.52416	5.44046	2.02775		3.67529	5.48159	1.90003	4.26776	1.84418
1.8561	2.54768	5.4473	2.03112		3.67744	5.49631	1.90317	4.2889	1.84968
1.85956	2.55774	5.46991	2.03162		3.68215	5.50558	1.90363	4.31659	1.85077
1.86408	2.56045	5.47673	2.03239		3.68891	5.51518	1.90392	4.32186	1.85364
1.86431	2.56832	5.49992	2.03328		3.72034	5.5197	1.90808	4.32242	1.85868
1.86568	2.57438	5.50487	2.03653		3.73438	5.55059	1.91006	4.32577	1.86037
1.866	2.57747	5.51317	2.03736		3.73774	5.55796	1.91167	4.33123	1.86087
1.86644	2.58381	5.54487	2.03838		3.73913	5.5719	1.9131	4.34969	1.86125
1.86742	2.58793	5.54746	2.04036		3.74378	5.58227	1.91643	4.35712	1.86307
1.87045	2.59399	5.57051	2.04818		3.74506	5.60395	1.92062	4.36913	1.8637
1.87389	2.5982	5.62324	2.05861		3.75144	5.69727	1.92087	4.39122	1.86639
1.88223	2.60012	5.63731	2.0599		3.7601	5.70553	1.92128	4.42653	1.8668
1.88322	2.60909	5.64737	2.06196		3.7621	5.7188	1.92236	4.42663	1.86701
1.8847	2.60996	5.64925	2.06206		3.7645	5.79262	1.92692	4.4339	1.86734
1.88704	2.61268	5.68422	2.06316		3.76974	5.81324	1.9272	4.44685	1.86983
1.8876	2.61864	5.72062	2.06431		3.7824	5.82862	1.92785	4.44756	1.87096
1.88968	2.62027	5.73545	2.06436		3.81445	5.86223	1.93566	4.45486	1.87142
1.89059	2.63988	5.82119	2.06809		3.81524	5.86706	1.93733	4.45557	1.87142
1.89201	2.64654	5.82821	2.07137		3.81662	5.86787	1.93916	4.45749	1.87598
1.89365	2.64754	5.8569	2.07392		3.81694	5.87418	1.94212	4.46669	1.87967
1.89691	2.65793	5.85695	2.07628		3.82049	5.88232	1.94237	4.48063	1.88241
1.89705	2.66727	5.87875	2.07901		3.83492	5.88443	1.94238	4.48668	1.8834
1.9008	2.67646	5.9642	2.08013		3.87614	5.90081	1.9444	4.49577	1.88482
1.90258	2.69117	5.97205	2.0802		3.89207	5.98884	1.94678	4.52065	1.88916
1.9045	2.70472	6.00346	2.08034		3.89583	6.00146	1.95113	4.53484	1.88956
1.90574	2.71111	6.00447	2.08177		3.90849	6.05068	1.95139	4.54198	1.89669
1.90577	2.71182	6.04615	2.08334		3.91666	6.0703	1.95333	4.5544	1.89743
1.90784	2.7178	6.04896	2.08395		3.92542	6.14129	1.95531	4.56805	1.89804
1.9165	2.72255	6.13894	2.1175		3.93862	6.14841	1.95621	4.58283	1.89851
1.91675	2.73951	6.14764	2.11854		3.96439	6.20307	1.95745	4.59776	1.89892
1.9174	2.76389	6.16678	2.1224		3.97034	6.22023	1.95837	4.61194	1.90751
1.9185	2.7705	6.16811	2.12459		3.97346	6.23227	1.95945	4.61339	1.90841
1.91971	2.77234	6.20138	2.12939		3.98995	6.2474	1.95954	4.61846	1.90923
1.92128	2.7864	6.24524	2.12958		4.0057	6.24827	1.9612	4.6208	1.91433
1.92221	2.79817	6.25116	2.12973		4.00829	6.28406	1.96269	4.63036	1.91539
1.92313	2.80392	6.26897	2.13065		4.01076	6.29977	1.96568	4.63187	1.91602
1.92516	2.82491	6.30925	2.13404		4.01119	6.36127	1.96829	4.65252	1.924
1.92556	2.83927	6.31297	2.13497		4.03026	6.36571	1.96878	4.67758	1.9254
1.92593	2.84189	6.31406	2.14748		4.031	6.38515	1.97148	4.69069	1.9255
1.92646	2.8479	6.34445	2.15757		4.05088	6.41949	1.97281	4.6924	1.92557
1.92824	2.85697	6.37341	2.16385		4.08039	6.43309	1.97403	4.69578	1.93054
1.92903	2.8664	6.4599	2.16443		4.08282	6.47105	1.97439	4.71349	1.93307
1.92965	2.86654	6.46236	2.16841		4.08425	6.48264	1.97519	4.73247	1.93335
1.93041	2.87298	6.46422	2.16948		4.12605	6.50687	1.97658	4.73469	1.93512
1.93226	2.87591	6.50035	2.17028		4.15541	6.53496	1.97801	4.73882	1.93538
1.93418	2.88084	6.54371	2.1703		4.16924	6.53778	1.97869	4.74469	1.93647
1.93425	2.89077	6.55193	2.1712		4.19798	6.60108	1.98095	4.75713	1.93678
1.93477	2.89404	6.5801	2.18056		4.26157	6.62183	1.98165	4.7772	1.93816
1.93537	2.89951	6.63098	2.19808		4.26279	6.70575	1.9836	4.83751	1.93918
1.93819	2.90042	6.66798	2.19834		4.26645	6.7592	1.99146	4.84358	1.93997
1.94539	2.90273	6.7179	2.20199		4.2899	6.76125	1.99551	4.86903	1.94612
1.94613	2.90714	6.77542	2.20233		4.30636	6.78209	2.00018	4.88628	1.94749
1.9463	2.90856	6.90442	2.20342		4.30882	6.82745	2.00134	4.88689	1.94936
1.94876	2.91099	6.9322	2.20654		4.31159	6.82948	2.00238	4.89992	1.95358
1.94947	2.9124	6.93683	2.20861		4.31261	6.86523	2.01006	4.92032	1.96181
1.95096	2.91491	6.95284	2.20994		4.35427	6.97345	2.01628	4.93978	1.96286
1.95241	2.91646	6.95686	2.21015		4.35445	7.01723	2.01783	4.95332	1.96292
1.95787	2.92896	6.97195	2.21027		4.35719	7.24029	2.02362	4.96152	1.96319
1.95985	2.93468	6.99281	2.22604		4.3821	7.24292	2.02473	4.96266	1.9667
1.96049	2.93601	7.07	2.23033		4.39652	7.25039	2.02483	4.97664	1.96752
1.96546	2.94043	7.07323	2.23656		4.41721	7.26937	2.02503	4.97878	1.9703
1.96703	2.94612	7.17738	2.23833		4.45987	7.33134	2.03046	4.98326	1.97305
1.97035	2.94918	7.19072	2.24145		4.4887	7.3573	2.03378	4.99007	1.97332
1.97172	2.95679	7.19967	2.24395		4.49482	7.37355	2.03502	4.99248	1.97924
1.97193	2.97729	7.2673	2.24869		4.50157	7.39964	2.03563	5.00779	1.97945
1.97327	2.97899	7.2814	2.25039		4.50689	7.40513	2.03633	5.015	1.98022
1.97691	2.98241	7.32039	2.25078		4.52879	7.51161	2.03947	5.01835	1.98187
1.98452	2.99424	7.35448	2.25333		4.53594	7.53602	2.04103	5.02218	1.98236
1.98483	3.00444	7.35522	2.25565		4.53614	7.53604	2.04775	5.02499	1.98378
1.98652	3.02576	7.42003	2.26065		4.54656	7.54238	2.04833	5.04139	1.98576
1.98722	3.02637	7.42907	2.26115		4.55516	7.5724	2.04875	5.04584	1.98918
1.99222	3.03292	7.4311	2.26527		4.56792	7.65414	2.05047	5.04708	1.99033
1.99286	3.03371	7.4547	2.26903		4.56913	7.65752	2.05201	5.0583	1.9904
1.995	3.03565	7.48379	2.27018		4.58823	7.70451	2.05494	5.07347	1.99174
1.99773	3.03566	7.56008	2.28496		4.61553	7.74832	2.05495	5.12218	1.9939
1.99958	3.04177	7.78917	2.29022		4.64522	7.75901	2.05746	5.12473	1.99554
2.00029	3.04449	7.79041	2.29191		4.6731	7.771	2.05832	5.12528	1.99708
2.0032	3.0526	7.82427	2.29534		4.69167	7.83638	2.06289	5.12772	1.9983
2.00614	3.06883	7.83893	2.2965		4.69562	7.84525	2.06616	5.13378	1.99856
2.0098	3.07111	7.86446	2.30265		4.69719	7.84671	2.0687	5.14103	2.00006
2.01031	3.07964	7.87045	2.30414		4.72438	7.8594	2.07031	5.14763	2.00195
2.01191	3.08199	7.88562	2.30615		4.76966	7.91367	2.07197	5.17101	2.00333
2.01311	3.08445	7.91354	2.30641		4.7862	7.95742	2.07514	5.17622	2.00603
2.01673	3.08459	8.05109	2.30717		4.84186	8.04888	2.07644	5.17936	2.00973
2.02059	3.0874	8.15536	2.30938		4.87247	8.06209	2.08102	5.1826	2.01408
2.02159	3.0904	8.16972	2.31029		4.93686	8.22699	2.08417	5.20254	2.01649
2.0226	3.09364	8.19022	2.31139		4.94026	8.2455	2.08572	5.2397	2.01709
2.02306	3.09929	8.2034	2.32617		4.94948	8.32649	2.08604	5.241	2.01783
2.02385	3.10214	8.31913	2.33108		5.00299	8.33723	2.08798	5.27512	2.01823
2.02654	3.10381	8.42251	2.33245		5.02425	8.36269	2.09067	5.29158	2.02575
2.02777	3.11379	8.51679	2.33268		5.02704	8.368	2.09166	5.29977	2.02695
2.03874	3.12224	8.58389	2.33504		5.03429	8.42373	2.09215	5.30332	2.02996
2.04084	3.12731	8.60587	2.34139		5.07539	8.47293	2.09252	5.31585	2.03117
2.04115	3.12801	8.6305	2.35667		5.12303	8.49974	2.10477	5.32166	2.03412
2.04182	3.13627	8.69325	2.36278		5.14776	8.54976	2.10973	5.33704	2.03429
2.04281	3.14158	8.75989	2.36905		5.2292	8.66698	2.11423	5.34982	2.03454
2.04361	3.15884	8.79781	2.36932		5.27682	8.78522	2.1144	5.35406	2.03718
2.0519	3.16674	8.8032	2.38659		5.29505	8.81731	2.11581	5.36509	2.03825
2.05272	3.1809	8.82019	2.38731		5.29861	9.03345	2.11873	5.36777	2.0439
2.05758	3.18195	8.82819	2.38927		5.30363	9.13551	2.12381	5.37549	2.04399
2.05806	3.18802	8.91405	2.39005		5.33556	9.18549	2.12432	5.42355	2.04429
2.05903	3.18885	8.94464	2.39059		5.36071	9.19936	2.12618	5.47064	2.04641
2.06665	3.2056	8.96439	2.39478		5.39725	9.30663	2.12644	5.49453	2.04753
2.07058	3.2225	8.9957	2.39586		5.40255	9.36018	2.12872	5.50005	2.04815
2.07104	3.22855	9.2077	2.40611		5.40668	9.50545	2.13292	5.509	2.04838
2.07613	3.23162	9.24455	2.40796		5.42113	9.5528	2.13448	5.52354	2.04898
2.07748	3.23609	9.38551	2.41281		5.4228	9.56498	2.14257	5.53328	2.05484
2.08294	3.25341	9.45752	2.41728		5.45621	9.59519	2.14601	5.53748	2.05622
2.08695	3.27097	9.51245	2.41927		5.48452	9.60968	2.14914	5.54585	2.05695
2.08736	3.27314	9.55844	2.42357		5.53638	9.61546	2.15131	5.57011	2.0592
2.09301	3.28918	9.69603	2.42463		5.54085	9.64384	2.15248	5.5809	2.06054
2.09554	3.29174	9.70181	2.42775		5.55866	9.67133	2.15403	5.60586	2.06829
2.09809	3.30064	9.73139	2.43146		5.59715	9.75573	2.15466	5.62614	2.06898
2.10034	3.32055	9.82356	2.43748		5.61808	9.83643	2.15475	5.63187	2.07114
2.10102	3.32334	9.96396	2.43763		5.62226	9.85947	2.15583	5.71975	2.07121
2.10207	3.32591	10.0233	2.43783		5.62247	9.8639	2.15984	5.76801	2.07122
2.10382	3.33173	10.1681	2.44364		5.63594	9.93943	2.16096	5.776	2.07291
2.10406	3.33289	10.2105	2.44599		5.67549	10.0611	2.16469	5.83636	2.07357
2.10626	3.33361	10.2264	2.45129		5.68216	10.099	2.16615	5.837	2.07367
2.10652	3.34065	10.3347	2.45724		5.74076	10.236	2.17303	5.83799	2.07425
2.10821	3.34196	10.4817	2.46104		5.75051	10.3151	2.17511	5.85087	2.07541
2.11536	3.35544	10.5636	2.46796		5.77148	10.321	2.17519	5.85597	2.07609
2.11741	3.35728	10.6399	2.47158		5.84306	10.37	2.17563	5.85793	2.07887
2.11766	3.36679	10.6549	2.48004		5.86427	10.4412	2.17638	5.8702	2.08051
2.1191	3.36979	10.7156	2.49228		5.87028	10.4633	2.17775	5.87318	2.08942
2.12521	3.39055	10.7418	2.49549		5.91135	10.5472	2.1831	5.87596	2.09078
2.12786	3.39075	10.8251	2.49694		5.94053	10.5642	2.18507	5.90366	2.09327
2.12848	3.39085	10.8624	2.50163		5.95377	10.5901	2.18536	5.91734	2.09473
2.12868	3.3912	10.9848	2.50343		5.96725	10.8326	2.18566	5.92389	2.09824
2.13548	3.39628	11.083	2.50499		5.97429	10.8474	2.18848	5.93712	2.10411
2.13682	3.40344	11.3295	2.51308		5.98003	10.8997	2.18984	5.94348	2.10641
2.13688	3.40845	11.3897	2.51505		5.98824	11.0102	2.19417	5.94365	2.1073
2.14118	3.41143	11.5691	2.51739		6.01308	11.1725	2.19542	5.95086	2.10775
2.14649	3.4208	11.6918	2.52522		6.0456	11.1757	2.19695	5.96478	2.11318
2.1475	3.42831	11.8427	2.5333		6.12962	11.1821	2.19709	5.97629	2.11344
2.1478	3.43608	11.9275	2.53413		6.14372	11.1931	2.20255	5.98452	2.11666
2.14816	3.44221	11.9952	2.5345		6.14673	11.2999	2.20343	5.99323	2.11723
2.14878	3.4483	12.0608	2.53823		6.28155	11.401	2.20573	5.99677	2.11978
2.14894	3.46692	12.1351	2.54029		6.30975	11.4729	2.21425	6.00839	2.121
2.1503	3.49039	12.393	2.54147		6.3233	11.5319	2.22042	6.0188	2.1277
2.15227	3.49281	12.4352	2.54211		6.35971	11.7686	2.2267	6.03738	2.13046
2.15518	3.50428	12.5	2.54678		6.37343	11.785	2.23215	6.04137	2.13243
2.16335	3.50461	12.674	2.55177		6.41415	11.8017	2.23748	6.05014	2.1338
2.16482	3.50602	12.7043	2.56007		6.44034	11.9293	2.24009	6.05683	2.13705
2.16724	3.54983	12.8935	2.56026		6.44582	11.9467	2.24116	6.05857	2.13903
2.16802	3.558	13.1832	2.56168		6.49956	12.1068	2.24195	6.08394	2.14156
2.1739	3.56166	13.233	2.57315		6.53316	12.537	2.24753	6.09493	2.14186
2.17582	3.56414	13.3521	2.57576		6.5946	12.5492	2.2492	6.10035	2.14666
2.17715	3.56891	13.4138	2.58131		6.60937	12.6007	2.24999	6.12296	2.14833
2.18262	3.56989	13.5178	2.58181		6.66386	12.6426	2.25333	6.13373	2.1487
2.18314	3.60432	13.5596	2.59024		6.77057	12.6955	2.25337	6.15158	2.15405
2.18604	3.60582	13.7326	2.59327		6.82296	12.7575	2.25544	6.1785	2.15621
2.18626	3.6291	13.8638	2.61087		6.83448	13.0587	2.25554	6.27776	2.15936
2.18651	3.6479	13.9083	2.61742		6.85045	13.1686	2.25564	6.28429	2.16259
2.18812	3.64996	14.0935	2.62222		6.87605	13.2312	2.26075	6.31612	2.16316
2.19098	3.65713	14.153	2.63251		6.94671	13.2997	2.26136	6.34817	2.16529
2.19119	3.66648	14.2492	2.6365		7.04733	13.3746	2.26319	6.36153	2.16754
2.19866	3.66897		2.63747		7.09637	13.5123	2.2681	6.36352	2.17342
2.20094	3.672		2.64384		7.20378	13.5795	2.26888	6.36853	2.17567
2.20155	3.67313		2.65371		7.22435	13.6139	2.27061	6.38147	2.17934
2.20385	3.67315		2.65391		7.31477	13.6653	2.27248	6.41837	2.18302
2.20439	3.67537		2.65655		7.34904	13.7153	2.27461	6.44216	2.18408
2.20598	3.68086		2.65834		7.38061	13.7582	2.27567	6.4459	2.18421
2.20875	3.68186		2.65924		7.51201	13.9857	2.27612	6.48335	2.18813
2.20888	3.6835		2.65961		7.58548	14.0312	2.27777	6.49942	2.19022
2.20966	3.69836		2.66		7.60016	14.1029	2.27836	6.51937	2.19225
2.22362	3.69845		2.66286		7.61263	14.1811	2.28032	6.52216	2.19297
2.22886	3.70133		2.66853		7.62198	14.2682	2.28097	6.52386	2.19757
2.23088	3.71971		2.67969		7.68562	14.4332	2.29234	6.5505	2.19915
2.23128	3.72066		2.68529		7.72718		2.29411	6.5849	2.20081
2.2354	3.75007		2.68785		7.7465		2.2974	6.66389	2.20181
2.23988	3.75764		2.69761		7.84261		2.30062	6.69098	2.20228
2.24126	3.77235		2.70018		7.89816		2.30222	6.70112	2.20408
2.24533	3.7778		2.70562		7.91063		2.30334	6.72401	2.20419
2.24666	3.78188		2.71699		7.96487		2.30369	6.74719	2.21044
2.24765	3.79855		2.71743		8.04899		2.30659	6.76309	2.21525
2.25668	3.80674		2.7201		8.21204		2.30696	6.79866	2.21932
2.2589	3.80761		2.72034		8.23449		2.3078	6.8127	2.22452
2.2612	3.81412		2.7316		8.23824		2.31919	6.82043	2.2281
2.26438	3.81675		2.73412		8.24624		2.32088	6.84445	2.23332
2.2644	3.81828		2.73521		8.24715		2.32262	6.92749	2.23684
2.26537	3.82388		2.73573		8.25485		2.32504	7.0063	2.23734
2.26878	3.82534		2.73901		8.30957		2.32687	7.00922	2.23793
2.27029	3.82592		2.74076		8.36635		2.32858	7.01904	2.24415
2.27091	3.82862		2.75122		8.37607		2.32872	7.07575	2.24829
2.27875	3.83571		2.75784		8.43027		2.33009	7.11564	2.24949
2.28087	3.83662		2.76138		8.56186		2.33772	7.12408	2.25026
2.28284	3.84633		2.77221		8.6027		2.33919	7.12575	2.25346
2.28681	3.85343		2.77221		8.64218		2.34348	7.14626	2.25395
2.28861	3.85713		2.77835		8.64912		2.34537	7.14803	2.25427
2.29021	3.85786		2.78025		8.69026		2.35379	7.16939	2.25553
2.29499	3.86765		2.78252		8.77923		2.35558	7.22911	2.25897
2.29784	3.88287		2.78693		8.94453		2.35878	7.24508	2.26124
2.30251	3.88555		2.79181		9.19827		2.35985	7.26683	2.26291
2.30263	3.89969		2.81079		9.20446		2.36124	7.30753	2.26349
2.30346	3.90504		2.81525		9.21138		2.36291	7.31802	2.268
2.30738	3.90813		2.8171		9.25833		2.36493	7.36057	2.27085
2.30897	3.91236		2.82927		9.28564		2.36595	7.42361	2.27158
2.30905	3.94961		2.83749		9.30347		2.3665	7.44138	2.27274
2.31519	3.95629		2.84074		9.45169		2.36757	7.46497	2.27289
2.31635	3.9574		2.84789		9.5469		2.36894	7.48045	2.27617
2.3172	3.96172		2.85383		9.55994		2.36962	7.51266	2.28453
2.31756	3.9761		2.87008		9.84113		2.37038	7.54099	2.28947
2.32517	3.97704		2.87553		10.0956		2.37213	7.60555	2.29181
2.3258	3.99063		2.88478		10.1373		2.37812	7.70404	2.29608
2.32706	3.99711		2.88708		10.1455		2.38175	7.74532	2.30669
2.3275	4.02125		2.88866		10.2713		2.38213	7.78648	2.30753
2.3279	4.02615		2.89021		10.3584		2.38239	7.81354	2.30872
2.33296	4.03038		2.89413		10.4287		2.38535	7.82893	2.30997
2.33346	4.06107		2.8962		10.5171		2.38622	7.83039	2.31187
2.33391	4.06207		2.89791		10.561		2.38724	7.88651	2.31393
2.33588	4.06691		2.89922		10.6491		2.39276	7.92124	2.31635
2.33713	4.06968		2.90441		10.7149		2.39343	7.92908	2.3165
2.33717	4.07257		2.90458		10.7243		2.39458	7.94198	2.31738
2.33956	4.08523		2.91089		10.9246		2.39589	7.9474	2.31942
2.3401	4.09094		2.91695				2.39685	7.96898	2.32745
2.34133	4.10774		2.91807				2.39848	7.97481	2.32852
2.34294	4.11287		2.92174				2.40115	7.99674	2.33042
2.3433	4.12026		2.93678				2.40416	8.00253	2.33394
2.3441	4.12187		2.93785				2.40663	8.01534	2.33492
2.34543	4.12816		2.94153				2.40696	8.08112	2.33833
2.34668	4.14332		2.94313				2.41073	8.12769	2.33868
2.34685	4.15805		2.94727				2.41086	8.15311	2.33961
2.34837	4.15889		2.94865				2.41223	8.15635	2.33979
2.35074	4.2003		2.95311				2.4124	8.1599	2.34071
2.35143	4.20346		2.95499				2.41405	8.21738	2.3419
2.3535	4.22215		2.96445				2.41443	8.37517	2.34245
2.35706	4.23152		2.96505				2.41486	8.40685	2.34442
2.36107	4.27251		2.97536				2.41653	8.41367	2.34544
2.36145	4.33937		2.98414				2.41891	8.56994	2.3504
2.36549	4.35851		2.99577				2.42167	8.57022	2.35332
2.36595	4.37846		3.00034				2.42557	8.60445	2.35502
2.36902	4.39226		3.003				2.42566	8.73211	2.35903
2.37154	4.39738		3.01147				2.43	8.78117	2.36337
2.38317	4.4083		3.01843				2.43414	8.78734	2.3725
2.38663	4.43902		3.02365				2.43487	8.8108	2.37312
2.391	4.44797		3.02472				2.43724	8.87432	2.37807
2.39353	4.45023		3.02983				2.43842	8.87642	2.38133
2.39493	4.45434		3.03479				2.43844	9.00494	2.38142
2.39551	4.46314		3.03696				2.43862	9.02356	2.39427
2.39697	4.46642		3.04047				2.43904	9.02476	2.39447
2.40213	4.47923		3.04059				2.44719	9.07415	2.39561
2.40555	4.49481		3.0406				2.44846	9.10397	2.39682
2.40749	4.50565		3.05174				2.44875	9.21864	2.40312
2.40932	4.54845		3.06711				2.45183	9.29874	2.40585
2.41003	4.55112		3.07158				2.4622	9.33673	2.40855
2.41169	4.55771		3.07451				2.46483	9.36008	2.41643
2.4122	4.56668		3.08542				2.46528	9.3824	2.41949
2.41383	4.56814		3.08601				2.46724	9.4498	2.42156
2.41451	4.57938		3.08661				2.47217	9.45715	2.42412
2.41761	4.58719		3.093				2.47403	9.52006	2.42945
2.41777	4.59958		3.09305				2.47416	9.52291	2.43146
2.41785	4.60511		3.09378				2.48019	9.58606	2.435
2.41924	4.6067		3.09703				2.48056	9.61662	2.43859
2.42048	4.62472		3.11364				2.48058	9.70228	2.44083
2.42143	4.65559		3.1144				2.48115	9.70763	2.44537
2.42506	4.65721		3.11658				2.48161	9.77997	2.4509
2.42824	4.65889		3.11976				2.48575	9.80121	2.45135
2.42936	4.66076		3.12521				2.48838	9.82992	2.45406
2.42972	4.68006		3.12952				2.49075	9.86103	2.45429
2.43262	4.69872		3.1327				2.49084	9.97008	2.45712
2.43308	4.69993		3.13322				2.49101	10.042	2.46586
2.43338	4.72661		3.13919				2.49466	10.0548	2.46684
2.43705	4.74931		3.14062				2.49603	10.0625	2.46754
2.4406	4.77132		3.15027				2.49792	10.1624	2.46768
2.44225	4.78538		3.15269				2.50135	10.2851	2.46841
2.44312	4.79383		3.16631				2.50411	10.4256	2.4685
2.45034	4.81186		3.17291				2.50743	10.4376	2.47149
2.45754	4.83146		3.1925				2.51197	10.4633	2.47464
2.45887	4.84217		3.19424				2.51709	10.6078	2.47758
2.46002	4.85773		3.1947				2.52587	10.7932	2.47824
2.46407	4.8707		3.2065				2.52754	10.9201	2.48596
2.46539	4.87463		3.21223				2.53181	10.9442	2.48824
2.46542	4.87517		3.21259				2.53543	11.0649	2.48842
2.47257	4.8805		3.21748				2.53995	11.1398	2.48972
2.47474	4.88873		3.21835				2.5404	11.1518	2.49396
2.47729	4.89013		3.21849				2.54723	11.2368	2.5013
2.47755	4.9087		3.22054				2.54751	11.3127	2.5102
2.4784	4.90881		3.22082				2.55055	11.3163	2.51103
2.48532	4.91125		3.22396				2.5541	11.4067	2.51137
2.48598	4.9181		3.24017				2.55904	11.4099	2.51201
2.48831	4.91837		3.2487				2.565	11.4202	2.51354
2.4887	4.93694		3.25029				2.56771	11.4417	2.51393
2.49191	4.9391		3.2544				2.57028	11.5455	2.51578
2.49353	4.96566		3.25719				2.57648	11.6254	2.51618
2.4958	4.9851		3.25927				2.57668	11.6474	2.51918
2.49725	5.05212		3.26925				2.57916	11.8648	2.52409
2.49936	5.06798		3.26988				2.582	11.915	2.52537
2.50462	5.07857		3.27003				2.58205	11.9331	2.52718
2.50467	5.08659		3.27241				2.58729	11.936	2.52775
2.50591	5.11607		3.27626				2.59638	11.9362	2.53339
2.50851	5.1242		3.28013				2.60189	11.9447	2.53725
2.51131	5.14889		3.28455				2.60939	12.0993	2.53821
2.51235	5.15082		3.29004				2.61314	12.2326	2.55962
2.51389	5.16812		3.29904				2.61344		2.57731
2.51401	5.17674		3.3081				2.62438		2.57883
2.51491	5.18866		3.31364				2.62447		2.58661
2.51756	5.18943		3.32072				2.62819		2.59134
2.5192	5.22956		3.32126				2.63387		2.59219
2.52211	5.24004		3.32142				2.64664		2.59255
2.5228	5.24245		3.32908				2.64694		2.5949
2.52306	5.25085		3.33526				2.64844		2.59562
2.52464	5.26522		3.35413				2.65112		2.59588
2.52576	5.26784		3.35487				2.65478		2.59771
2.52748	5.27321		3.35558				2.66669		2.59836
2.5347	5.27555		3.3676				2.67213		2.60092
2.53914	5.28279		3.37373				2.67215		2.60472
2.55221	5.2828		3.40094				2.67266		2.60528
2.55382	5.28836		3.41652				2.67509		2.60605
2.55592	5.31		3.42066				2.68308		2.61018
2.55937	5.3264		3.43697				2.68619		2.61296
2.56287	5.35548		3.43885				2.68698		2.62063
2.56526	5.38941		3.44043				2.69451		2.62159
2.56557	5.39218		3.44471				2.69562		2.62335
2.56862	5.39219		3.44919				2.69817		2.62507
2.56889	5.39491		3.45699				2.70006		2.62914
2.57467	5.4361		3.45868				2.70387		2.63013
2.57986	5.44536		3.46799				2.71169		2.63114
2.58527	5.44643		3.47391				2.71285		2.63406
2.58527	5.45414		3.49187				2.71311		2.63796
2.58676	5.45905		3.50019				2.71343		2.63988
2.58781	5.47208		3.50218				2.71519		2.6498
2.58862	5.54504		3.50969				2.72422		2.65166
2.58908	5.55262		3.51296				2.72744		2.65205
2.59084	5.57134		3.52442				2.74153		2.65231
2.60767	5.58664		3.53453				2.74237		2.6604
2.61131	5.6055		3.53887				2.7511		2.66079
2.61138	5.64816		3.54071				2.75368		2.67199
2.61171	5.65025		3.55428				2.75607		2.68034
2.61228	5.65539		3.56871				2.75636		2.68778
2.61627	5.67073		3.57665				2.75709		2.68865
2.61743	5.69311		3.59016				2.75729		2.69225
2.61788	5.7043		3.59501				2.76384		2.69276
2.61841	5.75043		3.60002				2.76662		2.69647
2.61927	5.79992		3.60211				2.76925		2.69692
2.61989	5.82231		3.60682				2.77229		2.69765
2.62071	5.83267		3.62003				2.79241		2.69801
2.62079	5.86432		3.62431				2.7987		2.69987
2.62395	5.88467		3.66637				2.80204		2.71859
2.62519	5.89005		3.67469				2.80265		2.7279
2.62521	5.90775		3.67886				2.81099		2.7309
2.62575	5.91366		3.67952				2.82114		2.73644
2.62865	5.91898		3.68961				2.82193		2.73743
2.62906	5.93346		3.69096				2.82222		2.74625
2.6307	5.951		3.69104				2.8277		2.74802
2.63099	5.98434		3.69263				2.8292		2.74823
2.63483	5.99597		3.7012				2.84922		2.7498
2.63491	6.03201		3.70423				2.85848		2.75493
2.63562	6.03744		3.70831				2.86152		2.75523
2.63689	6.05595		3.71801				2.86244		2.75541
2.63713	6.09619		3.72321				2.86697		2.75597
2.64303	6.10258		3.74481				2.87057		2.7564
2.64337	6.15474		3.7461				2.87921		2.75763
2.64503	6.19988		3.75023				2.88173		2.76335
2.64549	6.2132		3.75384				2.88805		2.76543
2.64784	6.25839		3.75594				2.89278		2.76774
2.6503	6.32205		3.7569				2.89367		2.76797
2.65249	6.33366		3.76525				2.89768		2.77244
2.65744	6.39632		3.77161				2.91029		2.77377
2.65874	6.39788		3.77384				2.91981		2.77412
2.65943	6.40037		3.77479				2.92463		2.7752
2.66021	6.40985		3.77531				2.92743		2.78795
2.66245	6.42665		3.80375				2.92805		2.79384
2.66537	6.45317		3.81142				2.93291		2.79771
2.66566	6.59877		3.84831				2.9368		2.79922
2.66994	6.67892		3.86929				2.93942		2.80013
2.67064	6.74111		3.88199				2.94606		2.80407
2.67808	6.77229		3.88847				2.94817		2.80613
2.68174	6.77636		3.90192				2.95383		2.80906
2.68702	6.78802		3.91508				2.95561		2.81081
2.68871	6.79322		3.91777				2.95644		2.81123
2.69253	6.79774		3.92063				2.96057		2.81166
2.69294	6.83064		3.92099				2.9687		2.81335
2.69564	6.83123		3.92587				2.97536		2.81467
2.69644	6.88332		3.92593				2.97747		2.82053
2.69751	6.91186		3.94298				2.97968		2.82158
2.70037	6.92945		3.94997				2.9823		2.82377
2.7011	6.93507		3.95116				2.98509		2.82663
2.7015	6.94535		3.95145				2.98627		2.82709
2.70225	6.97454		3.95327				2.99096		2.8306
2.70242	6.98105		3.97411				2.99152		2.84088
2.70725	7.00691		3.98841				2.9962		2.85198
2.7078	7.03049		4.00377				2.99927		2.85268
2.70898	7.05865		4.00949				3.00397		2.85506
2.70921	7.07371		4.03947				3.0069		2.86263
2.71407	7.10286		4.04527				3.00971		2.86332
2.71704	7.10841		4.0696				3.0145		2.86559
2.72271	7.11022		4.07898				3.01544		2.86567
2.7293	7.13441		4.08784				3.02013		2.87511
2.73125	7.17148		4.12796				3.03191		2.888
2.73557	7.19784		4.13356				3.03224		2.88844
2.73585	7.24097		4.17516				3.03737		2.88858
2.73609	7.26633		4.17679				3.03806		2.8951
2.74459	7.26654		4.18007				3.03907		2.89854
2.74707	7.27556		4.18163				3.04154		2.90563
2.751	7.27765		4.18211				3.04562		2.91929
2.76453	7.307		4.20135				3.04632		2.91972
2.77219	7.31789		4.21864				3.0606		2.92574
2.77299	7.62504		4.22565				3.06844		2.92694
2.77465	7.62951		4.23357				3.07067		2.92768
2.78032	7.63731		4.24138				3.07247		2.92823
2.78594	7.67033		4.24694				3.07618		2.9384
2.79388	7.67479		4.26158				3.07983		2.9512
2.80264	7.67823		4.26716				3.08614		2.95685
2.80677	7.74401		4.27742				3.09023		2.95795
2.80951	7.78793		4.30413				3.09262		2.96159
2.81548	7.79941		4.38766				3.09295		2.96183
2.82494	7.85461		4.39946				3.10121		2.96317
2.82833	7.85603		4.40672				3.10133		2.96382
2.83001	7.85872		4.41968				3.10723		2.96551
2.83234	7.86579		4.47546				3.11655		2.967
2.83313	7.92683		4.48338				3.12635		2.97052
2.84464	7.92923		4.48866				3.12834		2.97266
2.84592	7.93877		4.50587				3.13085		2.97769
2.85308	7.99509		4.51048				3.13406		2.98115
2.85991	8.05489		4.51275				3.13887		2.98231
2.86039	8.13764		4.54455				3.14389		2.98267
2.86089	8.16023		4.55244				3.14913		2.98537
2.86111	8.20024		4.56678				3.15045		2.99502
2.87265	8.30611		4.57611				3.154		2.99556
2.87888	8.34035		4.58609				3.16167		3.00021
2.8825	8.38028		4.60186				3.16303		3.00539
2.88323	8.44174		4.63031				3.16972		3.00907
2.88605	8.44376		4.6417				3.17787		3.01227
2.88677	8.53577		4.6837				3.19273		3.01887
2.88831	8.55362		4.68806				3.19407		3.0214
2.88934	8.6311		4.70119				3.19862		3.02466
2.8906	8.64109		4.70288				3.20012		3.03146
2.89068	8.7295		4.72237				3.20134		3.03178
2.90243	8.80162		4.72422				3.20279		3.03217
2.9083	8.82784		4.73019				3.20488		3.03587
2.90924	8.88414		4.76248				3.21651		3.03878
2.92357	8.91589		4.80518				3.2238		3.04323
2.94727	9.09411		4.84083				3.22623		3.04685
2.94755	9.11646		4.84679				3.22653		3.04955
2.9483	9.12821		4.85047				3.23044		3.05013
2.95127	9.15371		4.8785				3.23252		3.05536
2.95144	9.21075		4.8916				3.24348		3.05922
2.95238	9.23576		4.89507				3.25285		3.06316
2.95651	9.25909		4.90019				3.26254		3.06451
2.95822	9.27193		4.93199				3.26467		3.06867
2.95834	9.30227		4.95356				3.2648		3.06873
2.96075	9.32951		4.95752				3.27074		3.07549
2.96442	9.41736		4.96014				3.27366		3.07841
2.96693	9.53565		4.97493				3.27806		3.08178
2.96896	9.54797		4.99601				3.28522		3.08253
2.97218	9.55312		5.00241				3.29046		3.09293
2.97997	9.57513		5.01028				3.29245		3.10265
2.98098	9.63701		5.02363				3.31688		3.11568
2.98899	9.70061		5.03957				3.31783		3.11632
2.99006	9.7207		5.08519				3.33739		3.12093
2.99036	9.75842		5.09972				3.33888		3.12769
2.99493	9.79329		5.10767				3.34666		3.13447
3.00586	9.81215		5.11133				3.34828		3.13555
3.01203	9.92238		5.12303				3.35468		3.13898
3.01659	9.92244		5.1248				3.3576		3.14233
3.01836	9.94785		5.12491				3.37411		3.14277
3.02518	9.95272		5.13153				3.37527		3.14702
3.02861	9.95836		5.14648				3.37606		3.14855
3.03518	9.97145		5.21019				3.38311		3.14945
3.04839	9.97916		5.21239				3.38468		3.15437
3.05452	10.0123		5.23833				3.38686		3.15995
3.05511	10.0546		5.24968				3.38708		3.16276
3.06264	10.1074		5.24998				3.38962		3.1689
3.06287	10.1129		5.27712				3.39016		3.17579
3.06411			5.28512				3.39116		3.17735
3.0677			5.32443				3.39255		3.18069
3.06798			5.32475				3.39532		3.18399
3.07111			5.33139				3.39582		3.18561
3.07748			5.3463				3.39898		3.2148
3.08026			5.34853				3.40202		3.21544
3.08252			5.37174				3.40485		3.21561
3.08413			5.38652				3.40846		3.21716
3.09368			5.39761				3.41817		3.21739
3.10223			5.41223				3.41882		3.21762
3.10383			5.52187				3.42455		3.22008
3.11476			5.52638				3.42491		3.22379
3.11824			5.55155				3.42635		3.2293
3.1219			5.58032				3.42832		3.23846
3.12267			5.58328				3.42874		3.23925
3.13178			5.68608				3.43049		3.24261
3.13184			5.68771				3.43968		3.24722
3.13481			5.69416				3.44214		3.24952
3.13838			5.76516				3.44651		3.2522
3.13913			5.77344				3.45066		3.25303
3.14205			5.79939				3.45332		3.26035
3.14391			5.85016				3.4623		3.26134
3.14716			5.87193				3.46426		3.2772
3.1495			5.88921				3.48717		3.28678
3.16305			5.91656				3.49049		3.29566
3.16724			5.92911				3.49801		3.30896
3.16809			6.03276				3.50261		3.31223
3.16848			6.06618				3.50614		3.31242
3.17208			6.06751				3.50751		3.32323
3.17297			6.06762				3.5078		3.32672
3.17392			6.07188				3.50994		3.32772
3.17436			6.08709				3.51035		3.33411
3.17889			6.11932				3.51559		3.33434
3.1796			6.1217				3.52479		3.35028
3.17982			6.12228				3.52979		3.36133
3.18055			6.27589				3.53041		3.36406
3.18087			6.27769				3.5322		3.37439
3.18594			6.28254				3.5524		3.37563
3.18977			6.29154				3.5546		3.37882
3.19034			6.29515				3.55957		3.38203
3.19189			6.3018				3.56183		3.39069
3.19463			6.32059				3.57084		3.39371
3.20119			6.48305				3.5725		3.39477
3.20242			6.48605				3.57639		3.40001
3.20282			6.55241				3.57768		3.40024
3.20335			6.59566				3.58244		3.40446
3.20775			6.59914				3.58504		3.41355
3.21127			6.6008				3.58717		3.41691
3.21545			6.6751				3.58755		3.42012
3.21581			6.69324				3.58819		3.43073
3.22165			6.69592				3.58852		3.44078
3.22687			6.69752				3.59108		3.443
3.22698			6.73342				3.59318		3.44891
3.22924			6.76645				3.59898		3.45094
3.22963			6.78884				3.60442		3.45365
3.26788			6.79887				3.61031		3.45529
3.27366			6.84101				3.61961		3.46103
3.27533			6.88607				3.62228		3.46254
3.28159			6.90383				3.62464		3.46574
3.2868			6.93859				3.63351		3.46747
3.28682			6.95139				3.63538		3.48379
3.29266			7.03478				3.64308		3.48386
3.30523			7.09274				3.65237		3.50135
3.30555			7.12707				3.665		3.50745
3.31473			7.13168				3.66618		3.50785
3.31973			7.17367				3.67398		3.51768
3.32375			7.19622				3.67536		3.51824
3.33429			7.20473				3.68336		3.52029
3.33515			7.20585				3.70749		3.52035
3.33888			7.25393				3.70939		3.53345
3.34011			7.25493				3.72268		3.53422
3.35114			7.30145				3.72927		3.53538
3.35578			7.33937				3.73961		3.53626
3.3571			7.34258				3.73967		3.5445
3.36433			7.37524				3.74137		3.54996
3.38547			7.38579				3.7443		3.55848
3.3877			7.45511				3.74472		3.55946
3.392			7.46433				3.75246		3.56498
3.40151							3.75751		3.56718
3.40524							3.77706		3.5771
3.41707							3.77905		3.59012
3.42145							3.78245		3.59119
3.43067							3.78363		3.60276
3.43271							3.7917		3.60958
3.43726							3.79521		3.61637
3.4397							3.79716		3.6175
3.44139							3.79882		3.61784
3.44376							3.81932		3.61988
3.44629							3.81948		3.62608
3.4511							3.82269		3.63171
3.45303							3.8246		3.64628
3.45517							3.83256		3.65823
3.45907							3.83407		3.66013
3.46412							3.84696		3.6662
3.47842							3.86286		3.67664
3.48405							3.8642		3.69933
3.48461							3.86517		3.70245
3.48596							3.88066		3.70819
3.49413							3.88498		3.70989
3.49425							3.8877		3.71319
3.4948							3.90907		3.72314
3.49976							3.91316		3.74718
3.50119							3.91772		3.75486
3.50293							3.91911		3.76424
3.51635							3.93733		3.7742
3.51838							3.94182		3.77733
3.51965							3.94526		3.77771
3.52477							3.94923		3.78314
3.52591							3.95049		3.79908
3.52834							3.95084		3.80045
3.53245							3.95775		3.80806
3.54326							3.96021		3.80998
3.55215							3.96231		3.812
3.56249							3.96445		3.81335
3.56491							3.96611		3.82665
3.5808							3.98128		3.8271
3.58134							3.99519		3.82711
3.5818							3.99727		3.83163
3.58829							4.00092		3.83272
3.59082							4.00612		3.84288
3.59178							4.01103		3.84304
3.5986							4.04306		3.85709
3.59882							4.0442		3.85841
3.60255							4.04613		3.85876
3.60729							4.05113		3.86568
3.61069							4.0612		3.86713
3.61796							4.07375		3.88528
3.61877							4.07838		3.88791
3.61877							4.08062		3.89054
3.62333							4.08197		3.91611
3.62798							4.08266		3.9168
3.63354							4.08825		3.92771
3.6363							4.09949		3.93648
3.64662							4.09959		3.94348
3.65214							4.11868		3.94749
3.65523							4.14853		3.95143
3.65868							4.16226		3.95854
3.66413							4.16463		3.96652
3.66418							4.16478		3.98829
3.66718							4.16748		3.98948
3.67218							4.17014		3.99541
3.67773							4.1833		4.00395
3.67874							4.18535		4.00919
3.68016							4.19011		4.01484
3.68082							4.19653		4.01647
3.68447							4.23175		4.02621
3.68553							4.23602		4.03918
3.69184							4.2541		4.04233
3.70205							4.26508		4.05995
3.72081							4.26623		4.06565
3.72154							4.27135		4.06902
3.72242							4.27894		4.09291
3.726							4.28102		4.10083
3.72854							4.28622		4.12274
3.74788							4.28962		4.12395
3.75057							4.29303		4.12898
3.75215							4.29855		4.13081
3.76273							4.3013		4.14605
3.76631							4.3206		4.16192
3.801							4.3244		4.16438
3.80103							4.32854		4.17632
3.80504							4.32936		4.18733
3.81497							4.35236		4.20126
3.81508							4.36415		4.24174
3.81602							4.36417		4.24706
3.82471							4.39621		4.26467
3.83154							4.40351		4.26791
3.83179							4.40524		4.27079
3.83673							4.41542		4.27089
3.83842							4.42545		4.27301
3.8408							4.43359		4.27479
3.84156							4.44443		4.27782
3.84896							4.45657		4.27849
3.85699							4.50531		4.29221
3.8604							4.50954		4.29958
3.86458							4.51148		4.30431
3.87204							4.51458		4.30743
3.88023							4.51499		4.32278
3.88994							4.54011		4.32888
3.90172							4.55269		4.33496
3.90287							4.56697		4.33667
3.91295							4.58997		4.33691
3.92256							4.5958		4.39572
3.93001							4.6131		4.41165
3.93381							4.63554		4.41474
3.93389							4.63814		4.42627
3.94434							4.63937		4.44243
3.94863							4.67686		4.44491
3.94886							4.67918		4.4567
3.96111							4.68576		4.45762
3.96384							4.6869		4.45924
3.96558							4.69086		4.46401
3.97455							4.69187		4.46404
3.98837							4.70339		4.46837
3.99167							4.72766		4.48535
3.99992							4.73271		4.51006
4.01439							4.73827		4.51045
4.01845							4.74087		4.51586
4.02779							4.74206		4.52043
4.03624							4.74391		4.52722
4.03845							4.75435		4.54116
4.03924							4.76115		4.55313
4.04001							4.81362		4.56137
4.04305							4.81739		4.57568
4.05367							4.85165		4.57654
4.06604							4.85691		4.58774
4.06846							4.87024		4.59918
4.08022							4.87315		4.60494
4.08924							4.87427		4.62299
4.09786							4.87524		4.6276
4.09842							4.88255		4.63173
4.10896							4.90659		4.63604
4.11056							4.91487		4.64079
4.11086							4.92386		4.66048
4.11282							4.93541		4.67821
4.12846							4.93904		4.68831
4.12899							4.98194		4.69348
4.13013							4.98809		4.69975
4.13795							5.00336		4.71296
4.13935							5.01851		4.72107
4.14295							5.03036		4.73978
4.14594							5.03854		4.74549
4.1476							5.03913		4.77514
4.15704							5.04765		4.77901
4.15768							5.04811		4.78954
4.15778							5.04986		4.79482
4.16151							5.05902		4.80783
4.16839							5.06768		4.8143
4.17005							5.07552		4.84484
4.17178							5.07816		4.86538
4.19218							5.08791		4.87102
4.21361							5.08974		4.87749
4.21384							5.09134		4.88173
4.21419							5.09798		4.89079
4.21735							5.10107		4.91887
4.23158							5.10906		4.9306
4.23354							5.11579		4.93505
4.24522							5.11703		4.93778
4.2496							5.15351		4.95775
4.25166							5.17069		4.9581
4.2525							5.20494		5.00388
4.26092							5.20968		5.00968
4.27173							5.21378		5.01178
4.27308							5.22178		5.01531
4.27817							5.22696		5.03159
4.2832							5.22733		5.04091
4.28819							5.2295		5.06615
4.29043							5.22982		5.08392
4.29633							5.23502		5.09713
4.29793							5.24871		5.12486
4.29887							5.25299		5.14774
4.31309							5.25423		5.15141
4.32763							5.26123		5.15776
4.33608							5.26623		5.16697
4.33832							5.27876		5.16787
4.35646							5.27919		5.17419
4.37215							5.31287		5.18266
4.37538							5.31911		5.20472
4.38652							5.32324		5.23219
4.39357							5.32677		5.25314
4.41127							5.33493		5.26612
4.41138							5.35023		5.28237
4.42395							5.35201		5.29506
4.42554							5.35719		5.30007
4.45379							5.36514		5.31929
4.45511							5.38268		5.32783
4.46553							5.41045		5.36828
4.48375							5.44123		5.36968
4.48496							5.44838		5.37606
4.49829							5.46852		5.39816
4.51923							5.50267		5.40182
4.52587							5.50796		5.40802
4.53081							5.53184		5.41096
4.53813							5.53506		5.41202
4.54562							5.57144		5.41838
4.555							5.59991		5.42547
4.55651							5.61561		5.44329
4.56224							5.61778		5.45662
4.56875							5.62329		5.4951
4.57028							5.62627		5.5108
4.57864							5.63797		5.51433
4.6111							5.65429		5.5204
4.62689							5.65679		5.56432
4.644							5.6712		5.57776
4.65108							5.73116		5.61875
4.65912							5.73802		5.63338
4.66032							5.76568		5.65403
4.6604							5.76595		5.66275
4.66141							5.77647		5.66644
4.68396							5.7834		5.68805
4.69327							5.79084		5.69102
4.69883							5.8415		5.70933
4.7159							5.85293		5.721
4.71892							5.90942		5.72644
4.72676							5.94058		5.75047
4.72704							5.95733		5.75118
4.72982							5.98165		5.76586
4.73425							6.02219		5.76782
4.73603							6.02823		5.77936
4.75443							6.03542		5.79132
4.75613							6.07707		5.79534
4.75988							6.08583		5.8192
4.76276							6.09965		5.82069
4.76585							6.10234		5.82484
4.77771							6.12482		5.83101
4.78621							6.12868		5.8312
4.80654							6.14591		5.88
4.80687							6.14868		5.89918
4.80937							6.17041		5.89947
4.82884							6.18922		5.94947
4.83604							6.19415		5.95207
4.8438							6.19804		5.95277
4.85571							6.23685		5.95957
4.86366							6.2709		5.98214
4.88142							6.29315		6.0163
4.88428							6.31458		6.02814
4.88599							6.31551		6.02944
4.88696							6.33244		6.04829
4.90271							6.35191		6.04834
4.91771							6.35577		6.0615
4.94018							6.38208		6.0984
4.95944							6.39896		6.14337
4.97556							6.4165		6.1487
4.99126							6.41668		6.15912
4.99533							6.42196		6.17637
5.00325							6.42626		6.24454
5.00645							6.44307		6.2616
5.01244							6.46032		6.27317
5.04484							6.47926		6.3078
5.04668							6.54923		6.31255
5.0965							6.55329		6.34515
5.11055							6.56556		6.35249
5.11445							6.62272		6.35635
5.1387							6.63551		6.39313
5.15621							6.64342		6.39471
5.18137							6.65858		6.41207
5.19848							6.66684		6.45527
5.20588							6.72079		6.47864
5.21586							6.74192		6.49055
5.21986							6.77168		6.53305
5.23896							6.78319		6.54733
5.24284							6.79198		6.54998
5.24648							6.81286		6.55961
5.26635							6.83258		6.57277
5.26861							6.84323		6.60533
5.26901							6.84628		6.62135
5.27124							6.86427		6.64024
5.29779							6.9261		6.67515
5.31416							6.9284		6.68793
5.31648							6.95796		6.70483
5.32095							6.96853		6.71328
5.32408							6.98818		6.77934
5.33892							7.00506		6.80025
5.33984							7.00531		6.8448
5.39731							7.09882		6.84674
5.41682							7.11314		6.8542
5.42252							7.14072		6.85795
5.4521							7.18118		6.90065
5.45904							7.18256		6.90992
5.46197							7.18419		6.92385
5.47488							7.20885		6.92569
5.4785							7.24866		6.93246
5.49859							7.25439		6.93672
5.51028							7.28961		6.94275
5.5257							7.29837		6.94566
5.55568							7.3082		6.95364
5.56679							7.31362		6.9554
5.57291							7.33394		6.97018
5.58631							7.35418		6.99422
5.59436							7.40393		7.0112
5.62935							7.4218		7.01705
5.6314							7.46607		7.04625
5.68477							7.50227		7.0598
5.69501							7.56608		7.06567
5.72805							7.6096		7.126
5.73098							7.61985		7.23617
5.73227							7.71044		7.26297
5.74851							7.72704		7.287
5.75072							7.74509		7.37127
5.75157									7.37856
5.76857									7.38557
5.79404									7.42686
5.82524									7.45372
5.85594									7.49483
5.86575									7.49951
5.88463
5.88703
5.91798
5.92639
5.93415
5.9368
5.94599
5.95477
5.98296
5.98399
5.99609
6.04394
6.09309
6.0988
6.10751
6.12091
6.12682
6.14981
6.15347
6.18387
6.18452
6.18626
6.18828
6.19483
6.19669
6.20928
6.21909
6.23197
6.23486
6.25948
6.26068
6.30405
6.33585
6.33685
6.35616
6.37897
6.39138
6.4111
6.41119
6.41403
6.43515
6.43734
6.46957
6.49511
6.5028
6.50477
6.50964
6.52656
6.53459
6.5504
6.55337
6.56214
6.63187
6.65291
6.66852
6.67978
6.68477
6.70306
6.71703
6.7251
6.74496
6.82713
6.8389
6.8701
6.88784
6.88794
6.91873
6.95357
6.96319
7.02278
7.02702
7.05089
7.08168
7.10544
7.15503
7.16178
7.16238
7.19451
7.2005
7.26898
7.27659
7.28883
7.29336
7.30781
7.30922
7.39498
7.44791
7.45695
7.4735
7.52352
7.52387
7.54498
7.59198
7.61285
7.63174
7.63863
7.66405
7.66529

## Sheet: Figure 2G
Veh	Veh + ISRIB	Tg	Tg + ISRIB	HF	HF + ISRIB	0357	0357 + ISRIB	3610	3610 + ISRIB
0.507745	0.565677	0.97401	0.553143	1.16775	0.564749	0.96453	0.493416	0.87308	0.51502
0.556112	0.590016	1.0808	0.565942	1.20354	0.620264	0.988991	0.567813	0.979412	0.518057
0.557094	0.592905	1.09478	0.58483	1.20769	0.645971	1.03233	0.580309	0.990811	0.542796
0.563113	0.597815	1.09722	0.608078	1.22108	0.649888	1.09263	0.601923	0.999081	0.549137
0.574612	0.598486	1.098	0.61216	1.26622	0.661963	1.10516	0.603295	1.06844	0.561328
0.575658	0.603792	1.11036	0.613743	1.29937	0.670395	1.13103	0.604615	1.09506	0.562122
0.595287	0.617988	1.11683	0.619419	1.30062	0.676219	1.16799	0.605803	1.09894	0.5709
0.595359	0.628145	1.13385	0.627142	1.30189	0.696093	1.19257	0.652749	1.11797	0.578738
0.603899	0.628527	1.15225	0.62918	1.34612	0.703207	1.19619	0.654631	1.1238	0.581613
0.612206	0.632086	1.1551	0.637902	1.35582	0.710553	1.21107	0.655069	1.13078	0.586605
0.619284	0.632863	1.15622	0.639833	1.35705	0.719541	1.22577	0.657465	1.16903	0.587477
0.621012	0.647362	1.16599	0.654126	1.36104	0.726627	1.22833	0.66217	1.17769	0.595512
0.622562	0.64798	1.1741	0.660004	1.36972	0.732757	1.2355	0.662921	1.19031	0.596051
0.62286	0.650124	1.17823	0.660772	1.41829	0.737239	1.23856	0.673503	1.19169	0.597237
0.624363	0.663743	1.1863	0.6639	1.46102	0.742287	1.23942	0.683397	1.20406	0.605408
0.629528	0.663814	1.19557	0.666144	1.48339	0.75218	1.2431	0.684034	1.21549	0.608037
0.632512	0.664525	1.19916	0.67011	1.50389	0.756056	1.25176	0.686961	1.22174	0.630133
0.641451	0.666492	1.19934	0.680374	1.50438	0.757608	1.25468	0.688817	1.23102	0.632501
0.644123	0.676619	1.20231	0.685794	1.51072	0.758196	1.26235	0.690627	1.23184	0.636271
0.648803	0.684694	1.20862	0.687854	1.52737	0.769175	1.26316	0.693192	1.23514	0.640729
0.649471	0.684818	1.20909	0.69183	1.53742	0.769197	1.27009	0.694933	1.23617	0.640841
0.651361	0.691472	1.20975	0.692134	1.53902	0.771805	1.27322	0.700385	1.23644	0.648035
0.652497	0.693266	1.21006	0.693863	1.5409	0.787093	1.27461	0.703405	1.23721	0.648093
0.653643	0.694102	1.22132	0.695806	1.54527	0.789524	1.27523	0.705617	1.23772	0.64913
0.654026	0.695448	1.24601	0.69652	1.55912	0.793392	1.2881	0.706297	1.23968	0.651254
0.66423	0.700869	1.24906	0.696572	1.56713	0.794924	1.2917	0.707397	1.24441	0.659891
0.67037	0.720133	1.26658	0.696931	1.57035	0.797439	1.29353	0.708492	1.25031	0.662141
0.680161	0.721001	1.26922	0.698236	1.57836	0.803157	1.29678	0.71025	1.26099	0.664272
0.6819	0.72137	1.27463	0.698564	1.58058	0.803383	1.30058	0.711599	1.2639	0.668167
0.684068	0.724279	1.29207	0.700157	1.61802	0.808088	1.30509	0.71227	1.27238	0.668707
0.684308	0.72743	1.3009	0.702314	1.61907	0.812854	1.3144	0.714172	1.28076	0.668875
0.687097	0.730156	1.30424	0.703249	1.63005	0.815923	1.31706	0.714477	1.28185	0.672279
0.694826	0.730239	1.31385	0.705671	1.6604	0.830373	1.31901	0.716947	1.2928	0.672585
0.696414	0.735003	1.32045	0.708523	1.6647	0.836131	1.32093	0.717034	1.29349	0.672816
0.696467	0.744045	1.32171	0.712361	1.67634	0.842635	1.3224	0.717725	1.29739	0.673889
0.696707	0.744709	1.32298	0.715543	1.69556	0.849547	1.32476	0.727641	1.30929	0.675356
0.701124	0.748305	1.32462	0.716709	1.69938	0.850538	1.32486	0.728491	1.31247	0.677295
0.701349	0.752751	1.32781	0.717557	1.70321	0.853327	1.34982	0.728773	1.31413	0.678842
0.707661	0.755208	1.32882	0.718579	1.71651	0.870377	1.35476	0.730858	1.33153	0.679198
0.711551	0.756929	1.33709	0.720061	1.71807	0.874957	1.36644	0.731306	1.3364	0.679458
0.712482	0.76172	1.34575	0.720547	1.72521	0.877362	1.37597	0.733052	1.33679	0.680267
0.713748	0.769426	1.35442	0.721188	1.72853	0.888255	1.38222	0.739242	1.33892	0.68529
0.71404	0.77399	1.35472	0.721446	1.73624	0.891445	1.38471	0.739494	1.34748	0.689055
0.715404	0.776327	1.36134	0.722497	1.74082	0.893708	1.39259	0.742146	1.35331	0.689342
0.715666	0.782759	1.36273	0.723023	1.74107	0.894298	1.40396	0.742655	1.35514	0.692152
0.717544	0.788418	1.37153	0.723222	1.74753	0.895475	1.40723	0.742861	1.36046	0.696561
0.717564	0.788515	1.37448	0.724297	1.78106	0.89569	1.40842	0.742862	1.36362	0.697389
0.719055	0.790154	1.38614	0.725076	1.78488	0.896026	1.4093	0.742933	1.36445	0.700711
0.719796	0.79117	1.39119	0.726701	1.81108	0.910321	1.42447	0.744343	1.36649	0.701121
0.719841	0.799429	1.39502	0.726814	1.82122	0.910496	1.44621	0.749574	1.37387	0.704303
0.722344	0.801646	1.39509	0.732032	1.83391	0.91452	1.44841	0.749584	1.37475	0.704427
0.722847	0.80487	1.39584	0.733609	1.83495	0.916579	1.44855	0.751472	1.37933	0.705547
0.723864	0.810609	1.4046	0.73522	1.8375	0.916649	1.4587	0.752051	1.38404	0.706818
0.726996	0.8129	1.40534	0.736442	1.84539	0.927375	1.45896	0.752057	1.38522	0.709728
0.727637	0.816018	1.42339	0.737909	1.86378	0.933366	1.46583	0.755182	1.39855	0.710494
0.727757	0.825265	1.42694	0.741143	1.87342	0.933448	1.46863	0.757214	1.4006	0.712311
0.728774	0.825965	1.42787	0.742737	1.87566	0.933583	1.4718	0.760585	1.4017	0.715737
0.729174	0.82783	1.43402	0.743199	1.88186	0.935848	1.47465	0.762557	1.40634	0.71633
0.729441	0.827919	1.4389	0.743909	1.90948	0.948788	1.48581	0.764891	1.40709	0.717026
0.730727	0.828614	1.44717	0.746787	1.91736	0.95614	1.48702	0.769258	1.40931	0.717206
0.731594	0.830132	1.45301	0.747746	1.92949	0.960822	1.49513	0.769876	1.41081	0.717399
0.733085	0.834558	1.46233	0.756812	1.92983	0.962642	1.49778	0.774843	1.41285	0.7178
0.736538	0.834798	1.46525	0.758403	1.94157	0.964218	1.50048	0.782597	1.41902	0.721205
0.736769	0.835813	1.46805	0.760794	1.948	0.965737	1.50314	0.78409	1.41927	0.722498
0.737257	0.836706	1.47146	0.761911	1.95474	0.973678	1.50568	0.785681	1.42038	0.723083
0.737453	0.837729	1.47707	0.762228	1.98595	0.975032	1.50862	0.789382	1.42489	0.725004
0.737809	0.838	1.48182	0.764914	1.98832	0.97681	1.50881	0.790076	1.4269	0.725087
0.737934	0.838016	1.4853	0.767088	1.99825	0.980029	1.50976	0.790407	1.42692	0.725799
0.741205	0.839095	1.48825	0.771686	2.0005	0.984934	1.51028	0.790555	1.4324	0.728545
0.741397	0.847325	1.49397	0.773418	2.02045	0.984954	1.5188	0.791457	1.43793	0.731114
0.741437	0.847727	1.49948	0.774449	2.04739	0.993323	1.52114	0.796069	1.44015	0.731958
0.741751	0.850929	1.50043	0.776079	2.08268	0.993882	1.52717	0.797933	1.44153	0.73518
0.745367	0.851827	1.50314	0.777342	2.08561	0.994098	1.52784	0.799579	1.44448	0.735344
0.745843	0.854208	1.51219	0.778397	2.0859	1.0014	1.52844	0.800161	1.44922	0.735934
0.746214	0.856139	1.51375	0.778656	2.10366	1.00637	1.53612	0.802808	1.45194	0.73656
0.749239	0.857178	1.51947	0.77869	2.11241	1.00923	1.53615	0.80756	1.45411	0.739482
0.752358	0.857928	1.51982	0.779954	2.1145	1.01181	1.53652	0.808401	1.45727	0.739577
0.755555	0.857956	1.52552	0.781588	2.12323	1.01684	1.53704	0.813213	1.46257	0.740227
0.756031	0.858002	1.52881	0.783264	2.13995	1.01809	1.55943	0.814661	1.4652	0.741411
0.75798	0.861122	1.54095	0.785459	2.14392	1.02204	1.56771	0.815389	1.46547	0.750257
0.760682	0.863575	1.55037	0.785819	2.15207	1.02262	1.56812	0.815894	1.46717	0.751576
0.761242	0.865737	1.55346	0.787555	2.15388	1.02376	1.56945	0.817724	1.47448	0.753241
0.761249	0.867773	1.55505	0.790083	2.1652	1.02521	1.57706	0.818798	1.48003	0.754561
0.762616	0.869313	1.56019	0.79048	2.16684	1.03599	1.57863	0.819395	1.4881	0.759304
0.762894	0.869542	1.57222	0.791183	2.17518	1.03601	1.58169	0.819548	1.49191	0.761349
0.763726	0.871508	1.57645	0.794967	2.17754	1.037	1.58528	0.820098	1.49199	0.762907
0.763971	0.873929	1.58365	0.799284	2.1808	1.04479	1.6219	0.823041	1.49412	0.762977
0.765673	0.876579	1.58571	0.801474	2.18113	1.05071	1.62725	0.823067	1.49438	0.763451
0.767096	0.881029	1.59228	0.805467	2.19922	1.05396	1.63581	0.82565	1.49841	0.764836
0.767178	0.883396	1.59937	0.805646	2.21758	1.05742	1.63677	0.827076	1.50051	0.764857
0.772802	0.883657	1.60998	0.806166	2.22202	1.05769	1.63892	0.827106	1.50345	0.765224
0.777874	0.88556	1.61176	0.808292	2.2316	1.05921	1.64106	0.827929	1.50945	0.765573
0.778443	0.886921	1.6148	0.812281	2.23205	1.07071	1.64629	0.828277	1.5098	0.766007
0.779809	0.887046	1.62171	0.814616	2.23778	1.08503	1.66022	0.829612	1.51211	0.76665
0.780742	0.887657	1.62486	0.815931	2.24949	1.09069	1.66368	0.830543	1.51478	0.769341
0.780961	0.898208	1.63329	0.81657	2.26088	1.09224	1.66538	0.833359	1.51695	0.770371
0.781828	0.900948	1.63529	0.817106	2.26951	1.09696	1.67153	0.83472	1.52034	0.77185
0.782672	0.914736	1.63893	0.817114	2.27881	1.10056	1.67315	0.835829	1.52476	0.772693
0.785318	0.916441	1.64286	0.818805	2.28589	1.10497	1.67778	0.837152	1.52674	0.776189
0.785982	0.917497	1.64858	0.820656	2.3025	1.10559	1.68592	0.840964	1.52675	0.778097
0.787622	0.919621	1.65537	0.820781	2.30556	1.11554	1.702	0.842118	1.53545	0.780865
0.787687	0.920282	1.66538	0.821309	2.30897	1.11728	1.70215	0.843728	1.54869	0.785253
0.787793	0.925555	1.67139	0.821743	2.33185	1.1198	1.72735	0.844274	1.54976	0.788876
0.790832	0.929444	1.6733	0.825925	2.337	1.12067	1.73254	0.845847	1.56581	0.790851
0.792089	0.92955	1.67709	0.83023	2.34193	1.12877	1.73675	0.845854	1.56726	0.790924
0.795441	0.929732	1.70049	0.830736	2.34666	1.13204	1.74161	0.846391	1.56926	0.791405
0.798529	0.932825	1.7011	0.832334	2.35942	1.13208	1.7418	0.847302	1.57156	0.791684
0.801983	0.93623	1.70867	0.833644	2.36267	1.16309	1.74987	0.847922	1.57328	0.793001
0.803324	0.936568	1.70881	0.835796	2.36838	1.16999	1.75211	0.848813	1.57397	0.795507
0.803874	0.937	1.70928	0.836893	2.37392	1.17162	1.75443	0.851635	1.58287	0.795761
0.804047	0.937752	1.72695	0.837895	2.39139	1.18754	1.75445	0.851734	1.5852	0.795772
0.8051	0.942044	1.73576	0.838686	2.40126	1.19701	1.76079	0.85533	1.59108	0.796798
0.805881	0.949641	1.74001	0.840387	2.41362	1.19723	1.76987	0.855605	1.59123	0.80045
0.806294	0.952756	1.74307	0.841192	2.41494	1.19824	1.77882	0.856374	1.59253	0.800675
0.808784	0.956228	1.75474	0.842622	2.46797	1.20013	1.78561	0.856535	1.59403	0.802164
0.808896	0.960034	1.75943	0.846267	2.47054	1.21122	1.79777	0.857542	1.59609	0.802561
0.811369	0.962571	1.7723	0.849311	2.49433	1.21283	1.80367	0.857682	1.59681	0.805471
0.811417	0.96323	1.7922	0.851465	2.50571	1.2289	1.80791	0.858407	1.59917	0.810364
0.813013	0.964864	1.79338	0.852758	2.51314	1.2302	1.80892	0.859531	1.60586	0.81271
0.814302	0.969014	1.79857	0.856565	2.51788	1.23192	1.81431	0.86003	1.60829	0.81307
0.815601	0.969825	1.80935	0.866141	2.5195	1.23193	1.81675	0.861609	1.61515	0.813139
0.815845	0.970921	1.81686	0.866903	2.55439	1.23217	1.82445	0.862445	1.61606	0.813376
0.815991	0.973922	1.82529	0.867481	2.56377	1.23369	1.83007	0.862647	1.62058	0.814645
0.817756	0.974094	1.83488	0.868891	2.58661	1.23837	1.84503	0.864793	1.62577	0.817596
0.817964	0.978433	1.83767	0.870198	2.60582	1.23892	1.84861	0.865468	1.62739	0.818509
0.818294	0.979544	1.84995	0.871314	2.60748	1.24012	1.84952	0.86922	1.63249	0.819402
0.818856	0.982538	1.85963	0.872016	2.61584	1.24888	1.84973	0.869902	1.63516	0.820538
0.819999	0.985429	1.87291	0.872523	2.65869	1.25525	1.85089	0.869996	1.63593	0.822294
0.82056	0.990774	1.87338	0.875854	2.67029	1.25941	1.85105	0.871661	1.64083	0.823877
0.826915	0.991719	1.87567	0.875901	2.77525	1.26176	1.85168	0.873957	1.64315	0.826277
0.827437	0.992087	1.87723	0.876899	2.77642	1.26198	1.89088	0.87452	1.64632	0.826376
0.827513	0.992935	1.88206	0.877546	2.779	1.26626	1.89171	0.877897	1.6541	0.826763
0.82815	0.99349	1.88316	0.879338	2.7887	1.26701	1.89899	0.878268	1.66056	0.827668
0.828895	0.995167	1.88648	0.879413	2.80834	1.27475	1.90726	0.881198	1.66138	0.82827
0.829226	0.997058	1.8889	0.881336	2.8346	1.27535	1.91094	0.881596	1.66305	0.828908
0.83005	1.00051	1.89403	0.887362	2.8612	1.27625	1.92539	0.883459	1.67066	0.832736
0.830658	1.00157	1.90836	0.889553	2.86506	1.27889	1.9258	0.888561	1.67698	0.832826
0.83322	1.00171	1.9128	0.890701	2.88226	1.28458	1.9308	0.889557	1.68027	0.8359
0.833384	1.00378	1.9182	0.893617	2.88738	1.29072	1.93609	0.89073	1.69044	0.836658
0.835074	1.00421	1.9183	0.893829	2.90394	1.29324	1.93958	0.891538	1.69048	0.841679
0.837681	1.00459	1.91952	0.899529	2.92632	1.29545	1.94415	0.892135	1.69659	0.842882
0.838682	1.01434	1.93063	0.899694	2.96129	1.29949	1.9629	0.893449	1.70048	0.843421
0.83923	1.01768	1.93264	0.900133	2.99837	1.29971	1.97829	0.894095	1.70092	0.845126
0.839583	1.01796	1.94061	0.90048	3.01197	1.30663	1.98234	0.895498	1.70353	0.845226
0.84012	1.01852	1.94444	0.901715	3.05091	1.3073	1.98277	0.897597	1.71384	0.846512
0.842197	1.02145	1.94935	0.902237	3.06531	1.31425	1.98298	0.900092	1.71518	0.846578
0.842515	1.02331	1.95207	0.903374	3.07014	1.31474	2.00011	0.900334	1.71749	0.846979
0.844846	1.0273	1.96879	0.906001	3.09003	1.31677	2.0018	0.90058	1.72237	0.850977
0.844959	1.0292	1.97049	0.907687	3.09222	1.31844	2.00204	0.901987	1.72297	0.852302
0.846658	1.03039	1.9714	0.909865	3.13362	1.32003	2.01452	0.902145	1.72487	0.852946
0.847497	1.03353	1.97207	0.911926	3.13725	1.32593	2.02005	0.903393	1.72973	0.857288
0.847739	1.0346	1.97651	0.914337	3.13967	1.32961	2.0217	0.903919	1.73349	0.857444
0.848287	1.0395	1.98795	0.914538	3.16132	1.3319	2.02308	0.903924	1.73625	0.857796
0.849248	1.04123	1.98938	0.915986	3.17283	1.33803	2.02542	0.904045	1.73664	0.858402
0.850292	1.04291	1.99733	0.916324	3.19104	1.34424	2.0322	0.904684	1.73687	0.859953
0.853084	1.04302	2.00504	0.919378	3.19585	1.3488	2.03561	0.906928	1.74424	0.861171
0.854317	1.04325	2.00756	0.923484	3.21237	1.35213	2.03708	0.909684	1.75483	0.861963
0.855417	1.04397	2.01778	0.923968	3.22865	1.35382	2.04463	0.912073	1.75731	0.862298
0.855422	1.04717	2.02656	0.925763	3.23521	1.35492	2.04683	0.912688	1.75753	0.862591
0.855878	1.04753	2.03079	0.926669	3.23786	1.35725	2.04857	0.91397	1.75879	0.862939
0.856792	1.04778	2.03255	0.927712	3.28388	1.36426	2.05873	0.914808	1.76521	0.863166
0.859265	1.05104	2.03301	0.928758	3.33494	1.36617	2.06185	0.915428	1.7659	0.863899
0.860411	1.05631	2.03602	0.929797	3.33798	1.3685	2.07698	0.917704	1.7673	0.863989
0.860435	1.06708	2.03897	0.929878	3.34171	1.3696	2.07897	0.918253	1.76901	0.865571
0.862063	1.06744	2.04112	0.935373	3.37159	1.37836	2.08026	0.919922	1.76995	0.869438
0.863586	1.06762	2.05112	0.936325	3.46038	1.38246	2.08379	0.922263	1.77449	0.870189
0.863674	1.06807	2.05838	0.937609	3.46728	1.38275	2.09497	0.923953	1.77538	0.872516
0.864494	1.06811	2.07254	0.938834	3.46946	1.39251	2.10059	0.925798	1.77687	0.875973
0.8646	1.06848	2.07334	0.939276	3.51273	1.40202	2.10207	0.927979	1.77806	0.87892
0.866405	1.07018	2.10053	0.941144	3.51322	1.40512	2.10514	0.928086	1.77819	0.879105
0.867163	1.07138	2.10872	0.941587	3.52144	1.4054	2.10745	0.929027	1.78068	0.87913
0.867232	1.07276	2.10968	0.945943	3.52525	1.40563	2.10912	0.929035	1.78276	0.880105
0.867905	1.07426	2.12932	0.948965	3.54818	1.40685	2.1168	0.930719	1.78599	0.880577
0.87156	1.0744	2.13517	0.951711	3.60187	1.4163	2.12547	0.931525	1.78751	0.88084
0.872807	1.07592	2.13715	0.951917	3.62043	1.41694	2.12989	0.932525	1.78873	0.881324
0.873127	1.07717	2.13951	0.952448	3.62416	1.42076	2.13645	0.932861	1.79369	0.882358
0.873257	1.07746	2.14281	0.95385	3.63447	1.44082	2.14056	0.932943	1.79514	0.883321
0.873799	1.07978	2.14287	0.957057	3.635	1.44513	2.14788	0.935022	1.8038	0.884126
0.875778	1.08321	2.14317	0.95723	3.79287	1.44806	2.15544	0.935456	1.80441	0.884779
0.875974	1.09591	2.14525	0.957982	3.8128	1.44816	2.16856	0.935539	1.80694	0.888252
0.876386	1.1002	2.14865	0.960903	3.89267	1.45394	2.16888	0.93719	1.80721	0.889116
0.880895	1.1024	2.15277	0.961294	3.99969	1.45543	2.17688	0.938314	1.80934	0.890148
0.880914	1.10338	2.17259	0.961592	4.12228	1.46507	2.17761	0.938908	1.81544	0.890846
0.881063	1.10412	2.18687	0.962328	4.13225	1.47005	2.18003	0.939137	1.81676	0.891685
0.882986	1.1042	2.1879	0.962582	4.16535	1.47161	2.19821	0.941497	1.82205	0.892376
0.88484	1.10728	2.19352	0.964525	4.17307	1.47417	2.19972	0.943806	1.82346	0.892776
0.885192	1.10801	2.21221	0.967895	4.22743	1.48201	2.20117	0.946169	1.82409	0.894026
0.885678	1.10881	2.21262	0.969012	4.25887	1.48365	2.2056	0.946206	1.82904	0.894832
0.886465	1.10906	2.21492	0.969075	4.29986	1.48419	2.21022	0.94694	1.83765	0.895502
0.887138	1.11338	2.25418	0.973362	4.34725	1.48977	2.21133	0.94863	1.84013	0.896698
0.889012	1.11445	2.25817	0.980443	4.3525	1.49907	2.2144	0.948668	1.84722	0.89741
0.889686	1.11609	2.26266	0.980851	4.41722	1.50033	2.21625	0.952263	1.84899	0.897607
0.892258	1.11908	2.2712	0.982762	4.45514	1.50299	2.21865	0.95349	1.85747	0.897973
0.892451	1.11994	2.27428	0.982772	4.47615	1.50518	2.22975	0.953997	1.85919	0.898304
0.892646	1.12587	2.27678	0.983137	4.47771	1.50699	2.23974	0.956503	1.86488	0.898926
0.894202	1.13933	2.27734	0.983141	4.48571	1.50783	2.24293	0.957779	1.87269	0.901459
0.895555	1.14222	2.28612	0.984524	4.49205	1.51055	2.24416	0.957953	1.88102	0.902229
0.897145	1.14699	2.29403	0.98781	4.70471	1.51085	2.2467	0.958877	1.90059	0.903162
0.901865	1.15245	2.30563	0.990034	4.77964	1.51639	2.24699	0.960201	1.90071	0.903965
0.904332	1.1536	2.30654	0.991847	4.79636	1.52544	2.25013	0.961026	1.9047	0.905745
0.906454	1.1598	2.34141	0.993285	4.81046	1.52579	2.25981	0.962416	1.90597	0.912961
0.908416	1.16404	2.34416	0.99411	4.81138	1.54169	2.26429	0.962551	1.90645	0.913362
0.908668	1.16515	2.34709	0.997356	4.82335	1.54234	2.26567	0.963316	1.9082	0.917481
0.908999	1.16767	2.35304	0.997379	4.85139	1.54616	2.26684	0.964223	1.91467	0.918093
0.90918	1.16865	2.35899	1.00054	4.87324	1.56471	2.278	0.965733	1.91608	0.921412
0.909642	1.16996	2.37718	1.00081	4.89711	1.56501	2.28828	0.966832	1.91681	0.921864
0.90975	1.17528	2.38223	1.00754	4.90153	1.56837	2.28987	0.967097	1.9283	0.922185
0.911532	1.17768	2.38689	1.00856	4.9425	1.57652	2.29918	0.968188	1.93044	0.922298
0.912417	1.1779	2.41246	1.00973	4.96818	1.58324	2.30045	0.968697	1.93361	0.923748
0.912501	1.18863	2.41277	1.01021	4.98878	1.59589	2.30449	0.969036	1.94288	0.924182
0.912735	1.18973	2.43339	1.01378	5.0516	1.61159	2.31367	0.970112	1.94531	0.924927
0.917322	1.193	2.43725	1.01522	5.08595	1.61704	2.31841	0.970377	1.94719	0.92525
0.917827	1.19847	2.43764	1.01639	5.2362	1.61731	2.32039	0.970464	1.95187	0.925483
0.91951	1.19859	2.44296	1.01666	5.2725	1.62313	2.32487	0.971669	1.95337	0.929205
0.92167	1.2035	2.45681	1.01803	5.30132	1.62903	2.32667	0.971881	1.95614	0.930506
0.922593	1.20594	2.45713	1.01901	5.50748	1.63109	2.32881	0.971986	1.95789	0.931843
0.922662	1.20849	2.46149	1.01939	5.80012	1.63431	2.33135	0.974386	1.95895	0.933208
0.924472	1.21442	2.46416	1.02064	5.98965	1.64384	2.35217	0.975123	1.96465	0.933331
0.925356	1.22003	2.47052	1.02085	6.05283	1.64458	2.3544	0.976874	1.96796	0.933481
0.926956	1.22152	2.4707	1.02123	6.18961	1.64683	2.35654	0.978052	1.96971	0.934323
0.928198	1.22248	2.48124	1.02213	6.21039	1.64972	2.36194	0.978155	1.97007	0.934661
0.928688	1.22264	2.49468	1.02302	6.22719	1.65549	2.36746	0.978485	1.97334	0.93486
0.929299	1.22926	2.50464	1.02326	6.25916	1.66085	2.37397	0.979426	1.98785	0.936858
0.929698	1.23112	2.50948	1.02478	6.26297	1.68857	2.38517	0.980051	1.98951	0.93754
0.929891	1.23139	2.51326	1.02517	6.2733	1.69201	2.38639	0.981136	1.99114	0.939352
0.930141	1.23889	2.54109	1.02869	6.2931	1.69721	2.389	0.983258	1.99229	0.940648
0.9317	1.23944	2.5678	1.02905	6.47527	1.69909	2.40259	0.983286	1.99661	0.94118
0.933054	1.24134	2.5889	1.02919	6.49262	1.70272	2.40445	0.984904	1.99895	0.941789
0.934558	1.24429	2.59044	1.02976	6.53192	1.70693	2.42065	0.984935	2.00593	0.941936
0.934673	1.24853	2.60387	1.02998	6.59471	1.71229	2.42102	0.985483	2.00599	0.942949
0.934986	1.25029	2.61641	1.03149	6.62465	1.71317	2.42608	0.986059	2.00691	0.94303
0.938602	1.2513	2.62981	1.03413	6.66336	1.72271	2.45838	0.986273	2.0101	0.943429
0.938656	1.25557	2.63024	1.03457	6.68777	1.72586	2.46414	0.986952	2.01328	0.944857
0.939622	1.2583	2.63032	1.03474	6.73715	1.73066	2.47969	0.988262	2.03383	0.952502
0.939645	1.26406	2.6442	1.0362	6.97501	1.73179	2.48356	0.988973	2.03742	0.952795
0.940807	1.27283	2.65472	1.03701	7.14673	1.75875	2.48694	0.991098	2.03789	0.956424
0.94085	1.27339	2.66195	1.03888	7.27808	1.76112	2.48801	0.993985	2.03971	0.956544
0.943416	1.27516	2.66205	1.04151	7.28436	1.76544	2.50328	0.99599	2.04193	0.957505
0.944438	1.27626	2.66863	1.04206	7.48317	1.76964	2.50523	0.998466	2.04592	0.957665
0.94484	1.27764	2.67214	1.0428	7.5361	1.76966	2.51125	0.998905	2.05018	0.957891
0.949709	1.28317	2.67832	1.04508	7.87665	1.78	2.51136	0.998961	2.06384	0.958557
0.950409	1.28347	2.68479	1.04798	7.88935	1.78676	2.5138	1.00018	2.0712	0.959839
0.953644	1.28416	2.68534	1.04829	8.11247	1.79754	2.51917	1.00139	2.07421	0.959841
0.955698	1.28775	2.69151	1.04958	8.26967	1.79963	2.52572	1.00148	2.08124	0.960547
0.955856	1.28892	2.69185	1.05251	8.3602	1.80248	2.53935	1.0025	2.08643	0.960844
0.955963	1.29292	2.69487	1.05382	8.38577	1.80585	2.54773	1.00467	2.10527	0.961411
0.956692	1.29362	2.69698	1.05444	8.50713	1.80674	2.56373	1.00469	2.11112	0.961429
0.956801	1.29708	2.69771	1.05459	8.50742	1.81014	2.56746	1.00491	2.11129	0.961912
0.957052	1.29799	2.70168	1.055	8.69513	1.81121	2.57564	1.00636	2.11207	0.964682
0.957207	1.30084	2.70194	1.05706	8.79223	1.81405	2.58991	1.00852	2.12114	0.965223
0.957804	1.30093	2.71886	1.05729	9.04207	1.8167	2.59103	1.00879	2.13005	0.965457
0.958073	1.30162	2.7271	1.05742	9.4002	1.82981	2.61886	1.01203	2.14833	0.965742
0.962749	1.30596	2.72949	1.06319	10.0536	1.83053	2.62705	1.01252	2.15966	0.968098
0.963425	1.30604	2.73957	1.06346		1.83104	2.64615	1.01413	2.16237	0.968606
0.963737	1.30637	2.74214	1.06358		1.83666	2.65829	1.01727	2.16239	0.96953
0.966464	1.31162	2.75141	1.06559		1.83784	2.69077	1.01939	2.16983	0.970178
0.966474	1.31327	2.75393	1.06568		1.8426	2.69617	1.01943	2.17007	0.97058
0.968025	1.3165	2.7642	1.06621		1.8437	2.70184	1.02104	2.17399	0.974115
0.969373	1.31747	2.77698	1.06921		1.86356	2.76284	1.02129	2.17929	0.974773
0.970755	1.31864	2.8055	1.06974		1.86369	2.76755	1.02189	2.18064	0.975578
0.970792	1.32018	2.80931	1.07099		1.86371	2.78958	1.02319	2.18165	0.976805
0.970841	1.32086	2.81796	1.07248		1.86411	2.79181	1.02364	2.18514	0.979231
0.97207	1.32099	2.83045	1.07562		1.8687	2.79203	1.02381	2.18973	0.979679
0.975502	1.32224	2.84586	1.0767		1.87375	2.79259	1.02482	2.20401	0.979889
0.975694	1.32473	2.85234	1.0807		1.88004	2.79618	1.02496	2.20856	0.980476
0.977294	1.32575	2.85433	1.08782		1.88522	2.82116	1.02615	2.21064	0.981538
0.978246	1.32649	2.85871	1.08959		1.88843	2.82531	1.02659	2.21554	0.982113
0.981061	1.33061	2.86218	1.09346		1.89025	2.84095	1.02962	2.22267	0.982498
0.982697	1.3315	2.88185	1.09464		1.89893	2.84197	1.03046	2.22362	0.982871
0.982756	1.33678	2.90474	1.09467		1.90277	2.84323	1.03075	2.22375	0.983367
0.982762	1.33887	2.91743	1.09562		1.90513	2.84937	1.03146	2.22695	0.984918
0.983711	1.34274	2.93687	1.09843		1.90616	2.86443	1.03354	2.22913	0.986369
0.984417	1.348	2.94422	1.10036		1.91265	2.86678	1.03372	2.23075	0.9873
0.986596	1.35011	2.9471	1.10094		1.91327	2.88254	1.03383	2.23264	0.98886
0.987718	1.35085	2.94879	1.1016		1.91419	2.89587	1.03417	2.23392	0.990667
0.987969	1.35105	2.95131	1.10265		1.92818	2.90028	1.03421	2.2356	0.990802
0.988637	1.35125	2.95292	1.10268		1.93844	2.90538	1.0368	2.23735	0.991126
0.991425	1.3525	2.97012	1.10394		1.95866	2.91958	1.03942	2.23909	0.991876
0.991465	1.35445	2.9759	1.10622		1.95873	2.92654	1.03986	2.2409	0.992123
0.991966	1.36298	2.98902	1.10656		1.96496	2.92888	1.04191	2.24187	0.99307
0.992851	1.36417	2.99877	1.10853		1.97162	2.94296	1.04208	2.26046	0.995915
0.992959	1.37287	3.00197	1.10869		1.98189	2.96848	1.0431	2.26198	0.996363
0.994843	1.3758	3.01344	1.11156		1.98478	2.9814	1.04328	2.27162	0.996699
0.996257	1.38373	3.01987	1.11983		1.99176	2.98399	1.04455	2.27357	0.997863
0.997843	1.39843	3.03341	1.12032		1.99328	3.00564	1.04485	2.28279	0.998388
0.99871	1.40193	3.04383	1.1213		1.9939	3.00902	1.04547	2.30088	0.998785
1.00648	1.40878	3.05157	1.12361		1.99714	3.02235	1.04562	2.30406	1.00059
1.00836	1.41227	3.06072	1.12407		2.00059	3.02795	1.04649	2.30837	1.00361
1.00952	1.41306	3.07088	1.12467		2.01621	3.04853	1.04665	2.31689	1.00467
1.00978	1.41659	3.08825	1.12483		2.02041	3.0582	1.0491	2.31856	1.00653
1.01005	1.42023	3.08938	1.12571		2.03392	3.07617	1.04947	2.31885	1.00677
1.01107	1.42166	3.09503	1.12575		2.042	3.0825	1.05033	2.32073	1.0072
1.01131	1.42214	3.10594	1.12622		2.04811	3.10151	1.05145	2.32336	1.00787
1.01172	1.42478	3.11595	1.12666		2.04977	3.11361	1.05208	2.32489	1.011
1.01242	1.42488	3.11642	1.12685		2.05566	3.12439	1.05292	2.33862	1.01232
1.01344	1.4249	3.12084	1.12983		2.0666	3.13133	1.06036	2.34322	1.013
1.01388	1.42524	3.12559	1.13197		2.07346	3.13588	1.061	2.34939	1.0135
1.01577	1.43396	3.12903	1.13268		2.07503	3.14729	1.06214	2.35139	1.01456
1.0163	1.43735	3.15194	1.13615		2.07752	3.18818	1.06265	2.35141	1.0157
1.01678	1.43977	3.15928	1.14015		2.08098	3.18899	1.0627	2.35175	1.01591
1.0171	1.4406	3.18935	1.14689		2.08614	3.1904	1.06487	2.36127	1.01621
1.02144	1.44204	3.20521	1.14705		2.0961	3.19427	1.06594	2.37377	1.01651
1.02225	1.44837	3.2139	1.14925		2.10069	3.2088	1.0675	2.38191	1.01662
1.02408	1.45064	3.2323	1.14985		2.1064	3.22145	1.06798	2.38599	1.01794
1.02478	1.45973	3.24453	1.15129		2.12137	3.27727	1.0693	2.38708	1.01871
1.02751	1.4608	3.26133	1.15474		2.12782	3.30261	1.07118	2.38723	1.0204
1.03053	1.46224	3.27235	1.15546		2.1291	3.31266	1.07295	2.38838	1.02083
1.03093	1.46772	3.28366	1.15997		2.13327	3.33251	1.07717	2.39397	1.02115
1.03117	1.46873	3.28906	1.16029		2.13913	3.33857	1.07959	2.39526	1.02206
1.0335	1.46969	3.29665	1.1603		2.16407	3.37012	1.08175	2.41259	1.02265
1.03387	1.4724	3.31975	1.16362		2.16619	3.37152	1.08181	2.41404	1.02357
1.03889	1.4756	3.38056	1.16431		2.17119	3.38902	1.08207	2.42973	1.0252
1.03964	1.48013	3.41532	1.16481		2.17156	3.43692	1.08244	2.43382	1.029
1.03976	1.48363	3.42344	1.16491		2.1806	3.45466	1.0848	2.43879	1.02944
1.04099	1.48424	3.43927	1.16522		2.18169	3.46824	1.08498	2.45623	1.02979
1.04191	1.48554	3.46282	1.16628		2.18197	3.476	1.08769	2.45995	1.03085
1.04525	1.48775	3.46371	1.16838		2.18378	3.484	1.08812	2.46861	1.03199
1.04585	1.48834	3.53891	1.16924		2.18535	3.48578	1.08932	2.48143	1.03203
1.04896	1.49071	3.549	1.16963		2.19805	3.52349	1.0895	2.48703	1.03203
1.05771	1.4912	3.56222	1.171		2.20565	3.55459	1.09025	2.49312	1.03227
1.05848	1.50195	3.56733	1.17181		2.21494	3.57164	1.09577	2.50668	1.03339
1.05888	1.50751	3.57677	1.17211		2.22051	3.57677	1.09676	2.50972	1.0337
1.05948	1.50872	3.59695	1.17317		2.22204	3.59762	1.09694	2.51496	1.03376
1.0597	1.51035	3.60245	1.18062		2.22657	3.6083	1.09931	2.51621	1.03442
1.06014	1.51506	3.63812	1.18153		2.22751	3.61723	1.09959	2.51729	1.03575
1.06375	1.51708	3.6413	1.18452		2.24026	3.64095	1.10025	2.52151	1.03624
1.06482	1.5175	3.6472	1.18611		2.25366	3.65374	1.10218	2.5392	1.03708
1.06538	1.51822	3.65723	1.18673		2.2592	3.66964	1.10548	2.55487	1.03787
1.06608	1.52899	3.68466	1.18852		2.25964	3.71371	1.10878	2.56753	1.03899
1.06966	1.52923	3.7016	1.18908		2.26146	3.71728	1.10971	2.56907	1.03962
1.07003	1.53013	3.76279	1.19325		2.27952	3.71986	1.11078	2.59802	1.03966
1.07068	1.53013	3.76561	1.19697		2.28042	3.73774	1.11161	2.5992	1.03989
1.07092	1.53136	3.79965	1.1995		2.2832	3.75928	1.11169	2.60171	1.04221
1.07187	1.5353	3.82459	1.20143		2.28521	3.76447	1.11275	2.60558	1.04269
1.07223	1.54164	3.84139	1.2025		2.29223	3.76565	1.11344	2.61831	1.04434
1.07323	1.54212	3.84866	1.20331		2.30623	3.7899	1.11589	2.63318	1.04443
1.07644	1.54451	3.85703	1.20516		2.31411	3.79843	1.11629	2.63626	1.04595
1.0852	1.54713	3.8672	1.20946		2.31663	3.82211	1.11632	2.64264	1.04757
1.08705	1.54878	3.86906	1.20949		2.32155	3.82355	1.11833	2.6459	1.05059
1.08819	1.55573	3.8739	1.20958		2.32282	3.82775	1.12063	2.64646	1.05111
1.08966	1.55576	3.89542	1.2109		2.35964	3.83835	1.12164	2.65771	1.05165
1.09133	1.56527	3.89829	1.21745		2.35997	3.83981	1.12209	2.65895	1.05178
1.09226	1.56549	3.95146	1.2229		2.36281	3.85261	1.12538	2.6826	1.052
1.09246	1.56628	3.95787	1.22331		2.36886	3.85601	1.1296	2.69284	1.05222
1.09292	1.56638	3.96283	1.22378		2.40603	3.88347	1.13264	2.69298	1.05348
1.09508	1.57923	3.97093	1.22517		2.4087	3.89344	1.13666	2.70058	1.05518
1.09683	1.58226	3.97703	1.2284		2.42955	3.9396	1.13907	2.70954	1.05583
1.09858	1.58841	3.99844	1.22947		2.43014	3.94531	1.13952	2.71803	1.05755
1.09927	1.59086	4.00753	1.22993		2.43188	3.97215	1.13964	2.71872	1.05959
1.09981	1.59426	4.02779	1.23089		2.45711	4.01002	1.1398	2.72772	1.06176
1.10447	1.60064	4.05208	1.23265		2.45989	4.02222	1.14298	2.73715	1.06458
1.10515	1.60713	4.07946	1.23994		2.47488	4.06391	1.14606	2.7381	1.06501
1.10978	1.61165	4.10278	1.24187		2.47512	4.0875	1.14759	2.74985	1.06562
1.1119	1.62138	4.13317	1.24371		2.48328	4.09663	1.14772	2.75175	1.06566
1.11295	1.62738	4.14496	1.24481		2.48519	4.1001	1.15041	2.75313	1.06789
1.11328	1.62835	4.1721	1.24487		2.49721	4.11464	1.15122	2.75665	1.068
1.11656	1.6299	4.18047	1.2453		2.49831	4.14738	1.15147	2.76568	1.0681
1.11784	1.62992	4.20151	1.24566		2.5113	4.14791	1.15276	2.77766	1.06886
1.11901	1.63096	4.21293	1.24806		2.52041	4.1969	1.154	2.78234	1.06896
1.12108	1.63177	4.24147	1.24834		2.53038	4.20753	1.15608	2.78469	1.06902
1.12116	1.63518	4.25122	1.25038		2.53829	4.21059	1.15779	2.78518	1.07022
1.12125	1.63571	4.26199	1.25292		2.56427	4.24283	1.16086	2.79193	1.07155
1.12251	1.63738	4.26439	1.25315		2.57664	4.24388	1.16236	2.79374	1.07317
1.12272	1.6402	4.29061	1.2533		2.58281	4.25803	1.16296	2.7975	1.07715
1.12337	1.64051	4.32932	1.25621		2.60627	4.28346	1.16334	2.79954	1.07772
1.12348	1.64172	4.37792	1.25906		2.62083	4.29468	1.16394	2.80272	1.07949
1.12395	1.64344	4.39387	1.25928		2.63051	4.31431	1.16416	2.81537	1.08067
1.12894	1.65125	4.4069	1.26028		2.63423	4.32903	1.16416	2.8188	1.08099
1.12955	1.65496	4.49524	1.26114		2.63593	4.33456	1.16512	2.82076	1.08108
1.13211	1.65514	4.57391	1.26388		2.66694	4.37724	1.16577	2.82436	1.08213
1.13225	1.65526	4.60159	1.26418		2.67046	4.42909	1.16808	2.82871	1.08609
1.13246	1.65676	4.61175	1.27035		2.6816	4.48793	1.1688	2.85738	1.08864
1.13356	1.66403	4.63148	1.27081		2.71905	4.57372	1.17299	2.88866	1.09004
1.13834	1.66858	4.66021	1.27555		2.77005	4.60086	1.17308	2.8992	1.09035
1.13953	1.66891	4.75138	1.27849		2.7716	4.60824	1.17314	2.90271	1.09085
1.13986	1.67146	4.75352	1.2794		2.78478	4.62179	1.17341	2.90283	1.09088
1.14123	1.67174	4.81341	1.28341		2.7965	4.67826	1.17379	2.90749	1.10121
1.14298	1.67221	4.83412	1.28632		2.81028	4.7407	1.1744	2.90819	1.1013
1.14335	1.6723	4.86883	1.2884		2.83104	4.76486	1.17745	2.92759	1.1025
1.14438	1.67597	4.88199	1.28985		2.83138	4.7691	1.17781	2.93635	1.11416
1.14484	1.6766	4.90233	1.29136		2.83547	4.7693	1.17793	2.94701	1.11631
1.14494	1.68086	4.90436	1.29435		2.83832	4.77043	1.17925	2.94769	1.1179
1.14518	1.68216	4.91674	1.29768		2.84655	4.78388	1.18339	2.94849	1.11825
1.14666	1.68929	4.93233	1.29937		2.86873	4.78767	1.1838	2.98732	1.11966
1.14676	1.69732	4.94082	1.30027		2.89219	4.81233	1.18458	2.98834	1.12258
1.14961	1.70312	4.9499	1.30284		2.92995	4.82965	1.18834	3.0024	1.12361
1.14995	1.7051	4.97268	1.30478		2.96988	4.86867	1.18971	3.0059	1.12469
1.15026	1.7057	5.04556	1.30527		2.97456	4.90018	1.19146	3.00717	1.12476
1.15205	1.70632	5.05327	1.30758		2.98141	4.90692	1.19286	3.01326	1.12589
1.1537	1.72154	5.06263	1.30939		2.98168	4.92633	1.19359	3.01969	1.12708
1.16064	1.73557	5.07764	1.31634		2.98571	5.02653	1.19541	3.02212	1.13049
1.16176	1.73937	5.17147	1.31779		2.98863	5.05063	1.19724	3.02265	1.13312
1.16181	1.74225	5.17589	1.31837		3.00272	5.06703	1.19831	3.02906	1.13326
1.16503	1.75411	5.18411	1.32076		3.0296	5.07198	1.19933	3.04278	1.13441
1.16651	1.75439	5.18845	1.32084		3.04751	5.09626	1.2005	3.04756	1.13478
1.16669	1.7589	5.25231	1.32086		3.06833	5.16526	1.20139	3.06003	1.13521
1.16753	1.75912	5.25357	1.33329		3.07892	5.28502	1.2017	3.06047	1.13548
1.16759	1.76209	5.28407	1.33358		3.0831	5.29107	1.20188	3.06391	1.13646
1.16795	1.76586	5.32135	1.33401		3.08619	5.32327	1.20223	3.07714	1.13751
1.16936	1.766	5.32303	1.33505		3.08981	5.33946	1.20335	3.10712	1.14076
1.16964	1.76867	5.35315	1.33543		3.09324	5.35671	1.20356	3.13377	1.14345
1.17104	1.7704	5.45263	1.33642		3.09668	5.46377	1.20379	3.13461	1.14553
1.17309	1.7736	5.45803	1.33754		3.10295	5.46437	1.20679	3.16131	1.14573
1.17437	1.78698	5.54327	1.34638		3.10324	5.46513	1.20924	3.17683	1.1481
1.17457	1.79309	5.57065	1.35085		3.14843	5.49762	1.20955	3.17987	1.15014
1.17499	1.7965	5.58945	1.35274		3.14906	5.50392	1.20976	3.1825	1.15053
1.17608	1.79859	5.63838	1.35407		3.16186	5.5231	1.21116	3.19063	1.15095
1.17635	1.80493	5.64931	1.35969		3.17473	5.53439	1.21174	3.19476	1.15129
1.17636	1.8179	5.72671	1.36206		3.18079	5.58215	1.21189	3.22178	1.15189
1.17724	1.83334	5.73458	1.36264		3.19875	5.69047	1.21195	3.25359	1.15244
1.17809	1.84017	5.7462	1.36299		3.22329	5.81033	1.21204	3.26695	1.15333
1.17841	1.84202	5.78324	1.36449		3.25044	5.84214	1.21227	3.27202	1.15349
1.17862	1.85965	5.83334	1.36782		3.25055	5.85886	1.21348	3.27714	1.15448
1.18113	1.86529	5.84914	1.36973		3.27976	5.86281	1.21408	3.27991	1.1548
1.18416	1.86951	5.93339	1.37474		3.33155	5.88832	1.21418	3.28472	1.15938
1.18543	1.87085	5.9691	1.37548		3.34646	5.88897	1.21602	3.28901	1.16034
1.18665	1.87275	6.01239	1.37674		3.37397	5.92523	1.21839	3.2927	1.16086
1.19093	1.87393	6.22523	1.37947		3.39841	6.03002	1.21903	3.31798	1.16128
1.19152	1.87402	6.2453	1.37957		3.41069	6.10836	1.21954	3.3211	1.16966
1.1921	1.87745	6.39975	1.38059		3.41383	6.13186	1.21971	3.32283	1.17187
1.19272	1.87892	6.45493	1.38828		3.57937	6.13706	1.22028	3.32604	1.17201
1.19367	1.88626	6.46022	1.38867		3.59286	6.2	1.22056	3.32693	1.17396
1.19461	1.89115	6.54215	1.39141		3.61599	6.2911	1.22115	3.3353	1.17738
1.1972	1.89674	6.61026	1.39181		3.61888	6.33166	1.22155	3.35492	1.17894
1.19867	1.90611	6.61864	1.39467		3.63821	6.35289	1.22241	3.3655	1.18008
1.19901	1.90634	6.62876	1.39503		3.64328	6.48346	1.22262	3.38651	1.18159
1.19908	1.9086	6.73747	1.3963		3.65341	6.5861	1.22581	3.4013	1.18167
1.19941	1.90879	6.74405	1.39929		3.66039	6.59402	1.22706	3.40162	1.18188
1.2008	1.91148	6.8137	1.40499		3.67492	6.67401	1.22721	3.40423	1.18707
1.20183	1.91339	6.87209	1.40572		3.67843	6.67686	1.2297	3.43309	1.18805
1.20427	1.91463	6.92844	1.40791		3.73008	6.70221	1.23317	3.43957	1.18854
1.20542	1.9161	7.0121	1.4083		3.73727	6.70371	1.23363	3.44504	1.1934
1.20659	1.91987	7.024	1.40851		3.78436	6.71803	1.23423	3.4682	1.19369
1.2082	1.92247	7.21222	1.41265		3.83391	6.79002	1.23557	3.48849	1.19451
1.2113	1.92404	7.23965	1.42075		3.84793	6.8448	1.23771	3.49722	1.19503
1.21236	1.92687	7.3137	1.42238		3.86055	6.86778	1.24127	3.50508	1.19847
1.21311	1.92841	7.38086	1.42356		3.86278	6.94079	1.24427	3.51547	1.19851
1.21639	1.93069	7.4581	1.42659		3.91032	6.98205	1.24517	3.52722	1.19916
1.21794	1.94209	7.58963	1.42782		3.9717	6.98718	1.24637	3.56861	1.19972
1.22009	1.94633	7.77155	1.42895		4.019	7.02694	1.24797	3.57712	1.20042
1.22029	1.9471	7.80163	1.42917		4.02866	7.03874	1.24842	3.58324	1.20106
1.22116	1.95517	7.8031	1.43041		4.05055	7.11323	1.24908	3.60436	1.20125
1.22459	1.95874	7.8687	1.43332		4.08161	7.12465	1.25109	3.60686	1.20167
1.22679	1.96499	8.06411	1.43831		4.11212	7.2181	1.25143	3.61364	1.20261
1.22818	1.98027	8.0794	1.44042		4.14816	7.31536	1.25211	3.6343	1.20477
1.22852	1.98195	8.12185	1.44656		4.16227	7.35837	1.25325	3.64762	1.20605
1.22976	1.9849	8.12204	1.44743		4.17015	7.3813	1.25542	3.6914	1.20617
1.23082	1.99113		1.45282		4.17166	7.48864	1.25598	3.69279	1.20653
1.23473	1.99248		1.45308		4.17467	7.59138	1.2587	3.69561	1.20822
1.23729	2.00372		1.45566		4.22022	7.60313	1.25887	3.6958	1.20937
1.23765	2.00585		1.45639		4.22626	7.7182	1.26058	3.70558	1.21139
1.24176	2.01665		1.45685		4.23727	7.73172	1.26192	3.70965	1.21884
1.24238	2.03548		1.45825		4.24482	7.74842	1.26311	3.71165	1.22007
1.24376	2.03687		1.45848		4.26121	7.81454	1.26423	3.71424	1.22026
1.24381	2.04004		1.46551		4.29093	7.83789	1.26449	3.72012	1.22097
1.24396	2.04239		1.4667		4.3456		1.2667	3.72715	1.22127
1.24604	2.04665		1.46755		4.35141		1.2668	3.73171	1.22151
1.24637	2.04706		1.46839		4.36392		1.26736	3.75311	1.22197
1.24724	2.04988		1.46913		4.383		1.2675	3.78544	1.22214
1.248	2.05475		1.47217		4.40057		1.2684	3.80637	1.22273
1.25072	2.05705		1.47479		4.43493		1.273	3.82912	1.2233
1.25189	2.05751		1.47646		4.43637		1.27343	3.84549	1.22479
1.25216	2.064		1.47705		4.44776		1.27412	3.85097	1.22495
1.25354	2.06401		1.47999		4.45694		1.27596	3.85178	1.22622
1.25373	2.06439		1.48099		4.49421		1.2771	3.85989	1.22644
1.25436	2.06462		1.48594		4.51097		1.28149	3.91225	1.22712
1.25551	2.0665		1.48613		4.57794		1.28248	3.9166	1.22786
1.25613	2.07052		1.48629		4.59218		1.28266	3.94826	1.22844
1.2567	2.0753		1.48828		4.61986		1.28556	3.95559	1.22856
1.25858	2.0824		1.49174		4.69649		1.28688	3.978	1.22912
1.25898	2.09094		1.49458		4.71823		1.2874	3.97816	1.23105
1.25944	2.09295		1.49514		4.72266		1.29233	3.97907	1.23367
1.26092	2.09644		1.49748		4.73814		1.29262	3.98569	1.23568
1.26127	2.09703		1.50128		4.7583		1.29319	3.98608	1.23587
1.26251	2.11232		1.50359		4.77445		1.29347	4.01325	1.23644
1.26355	2.11573		1.50825		4.78566		1.29411	4.02535	1.2379
1.26433	2.11734		1.5086		4.79161		1.29432	4.06228	1.23836
1.26615	2.12711		1.50862		4.85231		1.29513	4.09479	1.24031
1.26741	2.1274		1.51322		4.8664		1.29679	4.09803	1.24036
1.26747	2.12961		1.51795		4.8698		1.2981	4.18628	1.24063
1.26788	2.13271		1.52476		4.87062		1.30024	4.18833	1.24463
1.2708	2.13852		1.53088		4.91261		1.30158	4.18972	1.24528
1.27139	2.14229		1.53504		4.95534		1.30306	4.20793	1.2555
1.27175	2.14323		1.53641		5.06455		1.30708	4.23411	1.25997
1.27175	2.14466		1.53712		5.22669		1.30881	4.25268	1.26314
1.2731	2.14852		1.53743		5.28453		1.30885	4.28588	1.26353
1.27334	2.15402		1.53766		5.33488		1.31078	4.29155	1.26419
1.27354	2.16442		1.53943		5.37682		1.31212	4.33293	1.26535
1.2754	2.17179		1.54547		5.49537		1.31372	4.33387	1.26553
1.27704	2.17693		1.54849		5.49587		1.31452	4.33582	1.27059
1.27817	2.19212		1.55143		5.50621		1.31588	4.35078	1.27114
1.27838	2.19933		1.56198		5.54739		1.3163	4.35647	1.27151
1.27926	2.19951		1.56525		5.5879		1.31725	4.3582	1.27354
1.28476	2.20038		1.56548		5.67791		1.31773	4.36653	1.27818
1.28782	2.20325		1.56564		5.69311		1.31785	4.37092	1.27947
1.28817	2.2129		1.56763		5.81024		1.31834	4.38572	1.27992
1.28863	2.21398		1.56942		5.89124		1.31969	4.40782	1.28146
1.2888	2.21672		1.57407		5.9382		1.32044	4.44591	1.28181
1.29265	2.22648		1.58023		5.93979		1.32057	4.44986	1.28369
1.29549	2.23401		1.58111		6.03119		1.32495	4.4778	1.28509
1.2957	2.23751		1.5843		6.10466		1.32528	4.47886	1.28654
1.2961	2.24274		1.58465				1.32648	4.47924	1.28654
1.29744	2.25248		1.58747				1.32802	4.53418	1.28706
1.30618	2.25952		1.58884				1.32964	4.54254	1.28778
1.30698	2.25958		1.58946				1.33591	4.54282	1.28882
1.30789	2.2716		1.59584				1.34263	4.55119	1.28953
1.30817	2.27634		1.5996				1.34358	4.56236	1.2906
1.30938	2.30003		1.6048				1.34513	4.56641	1.29083
1.30969	2.31079		1.60514				1.34532	4.57888	1.29367
1.31156	2.31188		1.61295				1.34565	4.62709	1.29472
1.31457	2.32193		1.6267				1.34601	4.63588	1.29546
1.31502	2.32575		1.62863				1.34815	4.66175	1.29751
1.31602	2.32606		1.63171				1.35108	4.66267	1.29751
1.3164	2.33903		1.63176				1.35244	4.66927	1.29776
1.3164	2.34184		1.63268				1.35431	4.72884	1.29975
1.31891	2.3451		1.63284				1.35494	4.73458	1.29988
1.32031	2.34979		1.63819				1.35782	4.75129	1.30008
1.32077	2.35536		1.64248				1.36192	4.7618	1.30098
1.32184	2.35772		1.64843				1.36223	4.7673	1.30133
1.32401	2.36089		1.65209				1.36344	4.77364	1.30178
1.32495	2.36329		1.65778				1.36479	4.79165	1.30324
1.32537	2.37018		1.65915				1.36581	4.79465	1.30414
1.32719	2.37955		1.65996				1.36752	4.79643	1.30582
1.32857	2.3815		1.66726				1.36868	4.83296	1.3062
1.32903	2.39298		1.67528				1.36873	4.89057	1.30704
1.33009	2.39348		1.67992				1.36947	4.89079	1.3083
1.33068	2.40437		1.69425				1.37129	4.90434	1.30854
1.33459	2.40758		1.69643				1.37602	4.93048	1.30938
1.33801	2.41213		1.69658				1.37931	4.9522	1.30953
1.339	2.4421		1.6972				1.37978	4.96431	1.31349
1.34007	2.45779		1.69834				1.38302	5.01124	1.3136
1.34036	2.46195		1.69981				1.38459	5.03652	1.31392
1.34142	2.48383		1.70645				1.38578	5.15256	1.31448
1.3455	2.48595		1.7101				1.38705	5.17808	1.31464
1.3465	2.49825		1.71732				1.3881	5.18439	1.31465
1.34685	2.49837		1.71732				1.38869	5.19648	1.31489
1.34725	2.50143		1.72244				1.38949	5.19737	1.32015
1.34825	2.50473		1.7257				1.38968	5.20376	1.32032
1.34937	2.50703		1.72694				1.39011	5.2204	1.32677
1.35052	2.50914		1.73132				1.39171	5.32597	1.32846
1.35094	2.51408		1.73165				1.39321	5.33337	1.32935
1.35254	2.53338		1.73637				1.39418	5.34087	1.33199
1.35297	2.54679		1.73651				1.39643	5.373	1.33355
1.35306	2.54703		1.73714				1.40236	5.38697	1.33413
1.35337	2.56368		1.73803				1.4058	5.45463	1.33481
1.35409	2.56926		1.73975				1.40695	5.48155	1.33777
1.35578	2.59424		1.74264				1.40732	5.50603	1.34044
1.3574	2.60361		1.74756				1.40927	5.62223	1.34258
1.35885	2.60725		1.75042				1.40998	5.63098	1.34277
1.36032	2.60768		1.75743				1.41137	5.65595	1.34295
1.36095	2.61047		1.75855				1.4116	5.66462	1.34465
1.36096	2.61798		1.76119				1.41223	5.67854	1.34917
1.36263	2.62483		1.76304				1.41285	5.72234	1.34989
1.36289	2.62695		1.7633				1.41433	5.72893	1.35174
1.36389	2.64424		1.76733				1.4157	5.73343	1.35475
1.36472	2.64832		1.7698				1.41731	5.73578	1.35705
1.36504	2.65352		1.77769				1.42064	5.745	1.35877
1.36647	2.66199		1.77805				1.4243	5.8174	1.35992
1.3677	2.66223		1.79024				1.42887	5.89592	1.36003
1.3678	2.68626		1.79199				1.42892	5.9129	1.3605
1.36944	2.68965		1.79235				1.43265	5.91555	1.36197
1.37088	2.69272		1.79447				1.4329	5.95224	1.3652
1.37175	2.69478		1.80018				1.43313	5.97932	1.36926
1.37432	2.69634		1.80024				1.43429	6.03727	1.37165
1.37587	2.70806		1.8024				1.4352	6.04728	1.37377
1.37618	2.70999		1.80795				1.43617	6.04906	1.37471
1.37823	2.71922		1.81049				1.43937	6.11274	1.3752
1.37926	2.7357		1.81119				1.44114	6.23818	1.37588
1.38063	2.74777		1.81504				1.44382	6.28409	1.37909
1.38314	2.76317		1.81585				1.44458	6.32908	1.3794
1.38315	2.76778		1.81896				1.44602	6.33401	1.37967
1.38353	2.77383		1.82183				1.44845	6.34078	1.38185
1.38388	2.79811		1.8272				1.45235	6.35846	1.38505
1.38627	2.80176		1.83083				1.45394	6.41884	1.38676
1.38628	2.80296		1.83086				1.4543	6.42816	1.39
1.38708	2.81071		1.84946				1.45594	6.43314	1.39288
1.38889	2.81595		1.85527				1.45641	6.48178	1.39399
1.38986	2.83033		1.85632				1.45645	6.55581	1.3966
1.3901	2.84863		1.85656				1.45662	6.62484	1.39849
1.39125	2.86496		1.86644				1.46455	6.74321	1.40233
1.39277	2.87983		1.86771				1.46467	6.75192	1.40341
1.39882	2.88102		1.86853				1.46623	6.91474	1.4057
1.39936	2.88368		1.86866				1.4681	6.99604	1.40649
1.40017	2.89351		1.87434				1.4693	7.15126	1.41003
1.40187	2.90309		1.87506				1.46986	7.17693	1.41151
1.40333	2.91659		1.87587				1.47106		1.41264
1.40442	2.91698		1.88691				1.47711		1.41495
1.40986	2.92038		1.88734				1.48058		1.41867
1.41032	2.93802		1.89238				1.48164		1.4194
1.41055	2.94522		1.89289				1.48832		1.4197
1.4121	2.94843		1.8966				1.48949		1.41998
1.41244	2.95822		1.89742				1.49058		1.42212
1.41261	2.95847		1.89809				1.49273		1.42237
1.41463	2.96265		1.89929				1.49344		1.42292
1.41683	2.96704		1.9066				1.49425		1.42391
1.41738	2.96831		1.90702				1.49935		1.42426
1.41993	2.98386		1.90925				1.50034		1.42501
1.42022	2.99952		1.90944				1.50234		1.42577
1.42067	3.00368		1.91037				1.50306		1.42977
1.42396	3.01312		1.91436				1.50777		1.43775
1.42453	3.02501		1.9156				1.51077		1.43776
1.42543	3.0422		1.91766				1.51115		1.44012
1.43172	3.05139		1.91774				1.51226		1.44141
1.43332	3.0525		1.92373				1.51643		1.44146
1.43403	3.0561		1.92611				1.5168		1.44194
1.43514	3.05715		1.92948				1.51735		1.44212
1.43743	3.05949		1.93613				1.51921		1.44614
1.43758	3.06189		1.94614				1.51933		1.4478
1.43917	3.0673		1.94993				1.52561		1.44998
1.44108	3.08545		1.95618				1.52569		1.45158
1.44462	3.08742		1.9663				1.52588		1.4516
1.44577	3.09173		1.96876				1.52804		1.45502
1.44588	3.09752		1.96989				1.53447		1.45599
1.44688	3.10354		1.97035				1.53737		1.45824
1.44922	3.11616		1.97606				1.53747		1.45902
1.44952	3.14674		1.99125				1.53815		1.46126
1.44959	3.15693		1.99153				1.53939		1.46189
1.45299	3.15707		1.99618				1.5401		1.46257
1.45431	3.16901		1.99694				1.54183		1.46329
1.45746	3.17716		1.99768				1.54455		1.46344
1.45901	3.17926		2.0083				1.54458		1.46359
1.46296	3.19512		2.01018				1.5474		1.46484
1.46324	3.23864		2.01341				1.54988		1.47377
1.464	3.25682		2.01868				1.55078		1.47558
1.4641	3.25972		2.02152				1.55409		1.47575
1.46474	3.25979		2.02683				1.55599		1.4773
1.46686	3.2611		2.02911				1.55644		1.48082
1.46803	3.27335		2.03145				1.55674		1.48515
1.4684	3.27895		2.03307				1.55856		1.48524
1.46925	3.28491		2.04088				1.56308		1.48682
1.47264	3.30772		2.04554				1.56378		1.48795
1.47463	3.31572		2.06085				1.5651		1.49417
1.4802	3.32637		2.06274				1.56631		1.49527
1.48038	3.34596		2.064				1.57688		1.49984
1.48217	3.34941		2.06467				1.59487		1.50063
1.48224	3.35414		2.06901				1.59642		1.50119
1.48308	3.35989		2.08297				1.59712		1.50238
1.4832	3.36336		2.08788				1.5978		1.50414
1.48334	3.40574		2.08979				1.60178		1.50697
1.48403	3.41609		2.09012				1.60293		1.51182
1.48449	3.42449		2.09329				1.60433		1.51357
1.48783	3.43245		2.09383				1.60481		1.51372
1.48794	3.48352		2.11059				1.60547		1.51408
1.48986	3.51308		2.11297				1.60561		1.5161
1.49048	3.53139		2.11523				1.60762		1.51636
1.49077	3.53832		2.11804				1.60917		1.51919
1.49234	3.54381		2.11939				1.61242		1.52303
1.4932	3.54759		2.12558				1.6176		1.52615
1.49496	3.57663		2.12574				1.61967		1.5268
1.49696	3.58454		2.13644				1.62002		1.52723
1.49773	3.58922		2.1379				1.62074		1.52903
1.50035	3.63714		2.14555				1.62221		1.52928
1.50387	3.65254		2.15231				1.63043		1.5304
1.50593	3.6607		2.18207				1.63161		1.53075
1.50904	3.66823		2.18592				1.63291		1.53324
1.50918	3.70835		2.1917				1.63321		1.53348
1.51016	3.72365		2.19374				1.63429		1.54115
1.51202	3.72957		2.19908				1.63506		1.54174
1.51205	3.73057		2.20088				1.63639		1.54187
1.51606	3.74869		2.22871				1.6394		1.54221
1.51613	3.76966		2.22908				1.63978		1.54234
1.51693	3.77778		2.23464				1.64032		1.544
1.51748	3.78491		2.25255				1.64315		1.54588
1.52128	3.79106		2.2535				1.6435		1.54599
1.52149	3.81879		2.25752				1.6438		1.54649
1.52332	3.82589		2.2648				1.64402		1.54877
1.52339	3.84678		2.27193				1.64584		1.55178
1.52578	3.88332		2.28049				1.64649		1.55511
1.52761	3.90912		2.28067				1.64702		1.55751
1.52783	3.91971		2.29269				1.64777		1.55847
1.52846	3.93567		2.29649				1.65699		1.55996
1.52852	3.9392		2.29965				1.66906		1.56306
1.52877	3.94157		2.30605				1.67127		1.56402
1.52936	3.95608		2.31544				1.67414		1.56668
1.53026	3.96233		2.32812				1.67466		1.56956
1.5317	3.96828		2.33366				1.67616		1.57003
1.53242	4.00201		2.34569				1.68011		1.57492
1.53881	4.03849		2.35843				1.68201		1.5767
1.5392	4.06434		2.35944				1.68205		1.57807
1.54033	4.06973		2.35987				1.6832		1.58559
1.54084	4.09115		2.36033				1.68557		1.58631
1.5424	4.11856		2.36741				1.69143		1.58667
1.54279	4.16101		2.38264				1.69191		1.58787
1.54868	4.18015		2.38401				1.69298		1.59021
1.54873	4.18787		2.38692				1.69588		1.59042
1.55075	4.22064		2.39101				1.69672		1.59697
1.55326	4.23417		2.3965				1.6989		1.59896
1.55446	4.23936		2.39786				1.70135		1.59965
1.55477	4.26005		2.39896				1.70208		1.60163
1.55513	4.28629		2.39932				1.70514		1.60496
1.5554	4.3249		2.40489				1.7083		1.61276
1.55788	4.32876		2.42195				1.71251		1.61465
1.56062	4.37417		2.43269				1.71366		1.61488
1.56292	4.38229		2.44107				1.71426		1.62147
1.56763	4.38647		2.44955				1.71781		1.6219
1.56903	4.39857		2.45058				1.72353		1.62203
1.57057	4.41232		2.45202				1.72504		1.62203
1.5708	4.41815		2.46109				1.7256		1.62295
1.57531	4.43779		2.47744				1.72697		1.62527
1.57734	4.44155		2.48077				1.72762		1.62593
1.58388	4.45511		2.49568				1.72874		1.62736
1.58494	4.49207		2.51216				1.73552		1.6289
1.58538	4.51171		2.51231				1.73643		1.63085
1.58859	4.53596		2.51548				1.7367		1.63117
1.5888	4.55131		2.5418				1.73689		1.63206
1.58952	4.58072		2.54276				1.73778		1.63682
1.59299	4.58144		2.55256				1.74066		1.63749
1.59429	4.65362		2.56258				1.74155		1.63869
1.59527	4.68252		2.58396				1.74249		1.63896
1.59887	4.77253		2.60509				1.7436		1.64061
1.59988	4.80276		2.6087				1.7478		1.65527
1.6014	4.81141		2.622				1.74845		1.65779
1.60175	4.83532		2.62294				1.75767		1.65974
1.6072	4.83661		2.62583				1.75964		1.66159
1.60749	4.85201		2.6338				1.76347		1.66582
1.60819	4.90952		2.65438				1.76415		1.67119
1.61238	4.90965		2.6552				1.76668		1.67398
1.61299	4.92211		2.66785				1.76787		1.67669
1.61565	4.94831		2.67013				1.76989		1.68118
1.61621	4.9715		2.68595				1.77844		1.68186
1.61814	5.00103		2.6916				1.78294		1.68208
1.6199	5.02687		2.71086				1.78314		1.6839
1.62016	5.03808		2.71716				1.7922		1.68455
1.62277	5.03981		2.72149				1.79552		1.69046
1.62394	5.04494		2.75673				1.79922		1.69329
1.62416	5.05168		2.76105				1.80084		1.6955
1.6274	5.08874		2.76371				1.80603		1.6997
1.62914	5.09477		2.78669				1.80906		1.70187
1.62953	5.12001		2.79919				1.80936		1.70279
1.62978	5.19846		2.80028				1.81257		1.7033
1.63065	5.19847		2.80299				1.81503		1.70606
1.6326	5.20261		2.82229				1.81791		1.70657
1.63264	5.21221		2.83893				1.81909		1.70787
1.63275	5.24347		2.88026				1.82086		1.71313
1.6329	5.24776		2.88043				1.82261		1.71315
1.63576	5.25233		2.88237				1.82331		1.7135
1.63719	5.25413		2.89652				1.82345		1.71516
1.63744	5.30921		2.8979				1.82876		1.71651
1.64066	5.32624		2.90433				1.83331		1.71939
1.64316	5.34094		2.90694				1.83497		1.71972
1.64417	5.34992		2.90876				1.83839		1.72008
1.64821	5.37318		2.91566				1.84037		1.72183
1.65378	5.39802		2.92409				1.84539		1.72309
1.65455	5.48308		2.94157				1.85188		1.72805
1.66086	5.49125		2.95771				1.85299		1.72907
1.66147	5.49437		2.9668				1.85417		1.72966
1.66463	5.55189		2.9687				1.85517		1.73
1.66524	5.58685		2.9915				1.86061		1.73168
1.66734	5.59691		3.00839				1.86587		1.73343
1.66989	5.73241		3.01345				1.86609		1.73564
1.67303	5.73877		3.0217				1.86759		1.74128
1.67674			3.02411				1.86766		1.74221
1.67982			3.02731				1.86772		1.74562
1.67985			3.03226				1.86839		1.75494
1.68005			3.03761				1.87211		1.7657
1.68087			3.04714				1.87288		1.76986
1.68227			3.04746				1.87591		1.77064
1.68245			3.05241				1.87965		1.77088
1.68331			3.05315				1.88622		1.77477
1.68545			3.06153				1.88887		1.77484
1.68975			3.06482				1.89728		1.77553
1.69322			3.07163				1.89855		1.77762
1.69478			3.09811				1.90662		1.77766
1.69712			3.132				1.91095		1.77901
1.69719			3.14477				1.91256		1.78091
1.69764			3.14741				1.91405		1.78116
1.70532			3.14773				1.91749		1.78342
1.70824			3.17277				1.91789		1.7842
1.70831			3.17961				1.92544		1.78489
1.70836			3.18803				1.92559		1.78495
1.70888			3.18824				1.92569		1.78542
1.71079			3.18911				1.92993		1.78947
1.71272			3.19309				1.93461		1.79322
1.71316			3.23066				1.94656		1.7956
1.71449			3.23875				1.94919		1.79581
1.71876			3.23911				1.95716		1.79767
1.72149			3.25227				1.95858		1.79823
1.72214			3.26609				1.96054		1.80092
1.72566			3.29829				1.96715		1.81112
1.72605			3.31453				1.96916		1.81119
1.72758			3.33068				1.97139		1.81386
1.73125			3.3339				1.97209		1.81657
1.73672			3.36137				1.97343		1.8193
1.73696			3.39696				1.97441		1.82533
1.73916			3.41036				1.97476		1.82551
1.74013			3.43058				1.97853		1.82943
1.74376			3.44831				1.97986		1.83138
1.74664			3.47403				1.98224		1.83634
1.74881			3.48089				1.98438		1.83895
1.75159			3.49653				1.98769		1.83932
1.76254			3.53428				1.98952		1.84102
1.7644			3.54398				1.98959		1.84282
1.76631			3.56588				1.99089		1.84305
1.76985			3.56684				2.00665		1.84701
1.77124			3.60289				2.01152		1.85019
1.77483			3.60825				2.01237		1.86044
1.77735			3.71767				2.02199		1.86388
1.77928			3.71889				2.02264		1.86526
1.78184			3.72535				2.02385		1.86534
1.78588			3.73364				2.02575		1.86906
1.78606			3.73785				2.03495		1.87205
1.78609			3.74614				2.03668		1.87579
1.78815			3.74914				2.0373		1.88062
1.78894			3.75024				2.03814		1.88412
1.78959			3.77057				2.04471		1.88688
1.78972			3.80129				2.04557		1.89081
1.78992			3.80703				2.04707		1.89402
1.79147			3.82925				2.04871		1.89467
1.793			3.83099				2.04909		1.89512
1.79518			3.84387				2.05027		1.9012
1.79648			3.8452				2.05356		1.90134
1.80106			3.85733				2.05525		1.90162
1.80239			3.86424				2.0585		1.90656
1.80348			3.87508				2.05947		1.91168
1.80726			3.89799				2.06031		1.91876
1.80728			3.93467				2.07645		1.92124
1.8111			3.93565				2.085		1.92711
1.81151			3.93843				2.09172		1.93753
1.82752			3.94798				2.09193		1.94299
1.83043			3.95267				2.09291		1.94626
1.84277			3.95315				2.09808		1.94887
1.84405			3.9992				2.10368		1.95001
1.84414			4.00116				2.10613		1.95175
1.85073			4.02693				2.10691		1.95372
1.85379			4.03904				2.11215		1.95606
1.854			4.06389				2.11411		1.95954
1.85537			4.07254				2.11898		1.96242
1.85592			4.07432				2.12105		1.96575
1.8592			4.16796				2.12265		1.96702
1.86166			4.17307				2.12547		1.98769
1.86469			4.17343				2.12664		1.99405
1.86774			4.21895				2.12788		1.99645
1.86856			4.22661				2.14076		1.99655
1.8693			4.28557				2.14081		1.99807
1.87201			4.30842				2.14803		2.00176
1.87247			4.31169				2.15538		2.00338
1.87891			4.31895				2.1567		2.00726
1.88068			4.32864				2.16058		2.00896
1.88887							2.16063		2.01438
1.89071							2.16262		2.01721
1.89156							2.17075		2.01934
1.89479							2.17732		2.02046
1.89594							2.185		2.02227
1.89882							2.18509		2.02526
1.90003							2.18713		2.03561
1.90051							2.18915		2.03605
1.90455							2.19372		2.03891
1.90698							2.19539		2.03963
1.90963							2.20595		2.0432
1.90979							2.20775		2.04523
1.91118							2.20866		2.04652
1.92228							2.20935		2.04758
1.92293							2.21023		2.06772
1.92824							2.21321		2.06788
1.92845							2.21642		2.06878
1.92912							2.21694		2.07064
1.92935							2.21934		2.07099
1.93138							2.22114		2.07198
1.93384							2.22282		2.07213
1.93666							2.22423		2.07246
1.9375							2.22588		2.07324
1.93879							2.22929		2.07398
1.941							2.23038		2.07778
1.9512							2.23418		2.08466
1.95912							2.23813		2.09773
1.96069							2.24102		2.09972
1.97053							2.24207		2.10079
1.97056							2.24341		2.1067
1.97214							2.24628		2.10747
1.97392							2.2475		2.10985
1.97464							2.25772		2.119
1.98107							2.2722		2.12382
1.98113							2.27281		2.12597
1.98507							2.27354		2.12697
1.98761							2.27632		2.12868
1.99099							2.27811		2.13011
1.99103							2.28032		2.13542
1.9917							2.28533		2.1369
1.99524							2.3015		2.13953
1.99748							2.30349		2.14195
1.99915							2.31095		2.14473
2.00173							2.31679		2.15984
2.00221							2.31708		2.16012
2.00444							2.32222		2.16811
2.00651							2.32779		2.16937
2.00954							2.33223		2.17183
2.01068							2.33228		2.18428
2.01091							2.3416		2.19255
2.01232							2.3482		2.19582
2.02524							2.3526		2.20533
2.02823							2.36586		2.21578
2.03611							2.36761		2.2261
2.03731							2.37194		2.22659
2.04326							2.37697		2.23045
2.05032							2.38344		2.23253
2.05497							2.38365		2.23333
2.06096							2.39305		2.23515
2.06224							2.39588		2.23724
2.06819							2.39928		2.24581
2.07125							2.40157		2.24622
2.07196							2.40436		2.24722
2.07232							2.40451		2.25207
2.07308							2.40627		2.25626
2.07588							2.4218		2.26537
2.08313							2.42535		2.27553
2.08324							2.42549		2.28652
2.08512							2.42756		2.29659
2.0884							2.43832		2.30116
2.08863							2.44629		2.31536
2.09118							2.45191		2.32086
2.09228							2.45275		2.32319
2.09343							2.46834		2.32626
2.09603							2.47599		2.33378
2.09882							2.47784		2.34121
2.1058							2.48209		2.34125
2.10701							2.49323		2.34894
2.10912							2.49765		2.35391
2.11151							2.50059		2.35496
2.11292							2.50407		2.36019
2.11348							2.50481		2.36453
2.11429							2.50611		2.36468
2.11757							2.50708		2.36848
2.12187							2.50973		2.36964
2.12642							2.51352		2.37523
2.13406							2.51814		2.37975
2.13692							2.52445		2.3839
2.13867							2.52644		2.38552
2.13911							2.53016		2.3861
2.14							2.53353		2.38686
2.14301							2.53788		2.39757
2.15557							2.53934		2.40111
2.15558							2.54736		2.40259
2.15709							2.55866		2.41047
2.16212							2.56393		2.41074
2.16637							2.57027		2.42357
2.16743							2.59138		2.42871
2.1736							2.5915		2.4339
2.17386							2.59355		2.43728
2.17483							2.60289		2.44162
2.17576							2.60906		2.4477
2.18167							2.62498		2.44826
2.18235							2.62671		2.47127
2.1837							2.63445		2.47337
2.18389							2.63512		2.47885
2.18889							2.65602		2.48371
2.18984							2.65602		2.48387
2.20422							2.65888		2.48719
2.20456							2.66484		2.49148
2.20696							2.66608		2.50024
2.21992							2.66647		2.5102
2.22385							2.66671		2.51103
2.22432							2.66731		2.51938
2.22596							2.66793		2.52343
2.2314							2.67933		2.54015
2.23628							2.70075		2.54156
2.23854							2.70914		2.54653
2.24164							2.71036		2.5533
2.24385							2.72313		2.55459
2.24465							2.72349		2.56858
2.24576							2.72412		2.57338
2.24888							2.72495		2.5852
2.24977							2.73608		2.6125
2.25495							2.73981		2.61313
2.25609							2.76362		2.63041
2.26296							2.76855		2.63916
2.26545							2.77335		2.64487
2.26992							2.7788		2.65073
2.2717							2.78426		2.66426
2.27172							2.78741		2.67117
2.2757							2.79063		2.67293
2.28929							2.79088		2.67549
2.2911							2.80048		2.67922
2.29306							2.8045		2.67984
2.29806							2.81092		2.70163
2.31515							2.81466		2.70982
2.31536							2.81581		2.71161
2.31617							2.81752		2.72463
2.31653							2.81857		2.72935
2.31797							2.82326		2.72962
2.31949							2.82559		2.72964
2.32424							2.83142		2.75272
2.32911							2.84454		2.7528
2.32935							2.85823		2.75422
2.33139							2.85865		2.75525
2.3358							2.86305		2.76133
2.33642							2.87307		2.7619
2.33941							2.87416		2.7675
2.33965							2.87972		2.77047
2.34212							2.89203		2.77093
2.3487							2.89657		2.77507
2.35361							2.89898		2.78632
2.35361							2.90074		2.79902
2.35636							2.90583		2.80165
2.35782							2.90869		2.80851
2.37568							2.91231		2.82434
2.37606							2.92914		2.8295
2.37841							2.92926		2.83932
2.38012							2.94193		2.84169
2.38307							2.95546		2.84461
2.38316							2.95864		2.84629
2.38941							2.96451		2.84689
2.40283							2.96596		2.85232
2.4036							2.96623		2.85401
2.40445							2.96646		2.85773
2.4059							2.96745		2.86206
2.40835							2.97318		2.86271
2.40866							2.99587		2.86515
2.41341							3.00203		2.87437
2.41441							3.00961		2.87468
2.41812							3.01193		2.89285
2.41945							3.02459		2.89677
2.42883							3.02802		2.89869
2.43577							3.0354		2.90364
2.44182							3.03547		2.90819
2.44767							3.04574		2.91105
2.45418							3.05151		2.92459
2.46679							3.06609		2.95328
2.46878							3.06794		2.9543
2.48253							3.09488		2.96401
2.48369							3.12208		2.96762
2.48535							3.13087		2.97542
2.4891							3.13902		2.98091
2.49316							3.14859		2.98448
2.50208							3.15262		2.98989
2.51212							3.19473		2.99279
2.51645							3.20437		2.99594
2.52431							3.20808		2.99605
2.53168							3.2083		3.00769
2.5324							3.20934		3.01247
2.53567							3.20981		3.02339
2.53662							3.2122		3.0235
2.5444							3.22048		3.03041
2.54586							3.22949		3.04076
2.5498							3.24829		3.05175
2.56081							3.24965		3.06728
2.56507							3.25354		3.07911
2.57327							3.26608		3.08726
2.57499							3.27582		3.08823
2.57626							3.27877		3.09771
2.58934							3.28667		3.10327
2.59589							3.32416		3.1079
2.60023							3.34162		3.11237
2.60093							3.35008		3.11304
2.60918							3.3524		3.11982
2.61151							3.363		3.13869
2.61307							3.36463		3.14867
2.61638							3.36575		3.15572
2.61716							3.36838		3.18671
2.61769							3.37807		3.18863
2.6189							3.38248		3.19815
2.62455							3.39129		3.19958
2.63006							3.4252		3.20587
2.63006							3.43226		3.21184
2.64381							3.43435		3.21968
2.654							3.43963		3.22242
2.65886							3.44166		3.22494
2.65935							3.45644		3.23251
2.66325							3.48304		3.24251
2.66336							3.48409		3.2444
2.68233							3.49436		3.24611
2.69167							3.49599		3.26213
2.69837							3.50165		3.27609
2.70051							3.51172		3.28879
2.70568							3.5385		3.30401
2.70879							3.54178		3.32093
2.71218							3.54844		3.32219
2.71548							3.55192		3.33007
2.71555							3.55515		3.33301
2.71616							3.56633		3.33457
2.71881							3.60727		3.36664
2.73125							3.61696		3.37407
2.73439							3.6472		3.3826
2.74425							3.66635		3.38676
2.74614							3.67016		3.39391
2.76937							3.67557		3.40148
2.77533							3.6791		3.40408
2.77841							3.69192		3.41948
2.79358							3.69355		3.43892
2.81487							3.69608		3.44872
2.82177							3.70397		3.47028
2.84176							3.71258		3.47246
2.84414							3.71809		3.47349
2.85626							3.73281		3.48128
2.86221							3.75538		3.48801
2.86561							3.75637		3.49306
2.86945							3.77286		3.4936
2.87805							3.77657		3.49415
2.87905							3.7946		3.50595
2.87969							3.81269		3.50914
2.92125							3.81561		3.51467
2.92284							3.81929		3.51474
2.92468							3.83184		3.52614
2.92831							3.8489		3.53756
2.93836							3.85394		3.54013
2.95002							3.87042		3.5559
2.95324							3.8728		3.5641
2.96497							3.87765		3.57379
2.96969							3.88158		3.57569
2.97636							3.88536		3.5925
2.97969							3.91248		3.63409
2.98431							3.92966		3.65828
2.98629							3.94512		3.66909
2.99917							3.96732		3.66918
3.00058							3.96873		3.67076
3.00545							3.96888		3.69874
3.01483							3.9776		3.69964
3.01499							3.97845		3.70039
3.01817							3.98001		3.70828
3.01831							3.98156		3.77262
3.02054							4.04107		3.79451
3.0291							4.04313		3.79784
3.02985							4.0472		3.81751
3.06183							4.05909		3.82637
3.06514							4.06332		3.82824
3.0799							4.06529		3.85154
3.0967							4.06797		3.86287
3.13599							4.07244		3.93126
3.13898							4.08081		3.93331
3.145							4.09293		3.94142
3.1736							4.09728		3.95284
3.17812							4.10077		3.95631
3.18178							4.12066		3.97377
3.19164							4.15189		3.97445
3.20244							4.1554		3.98624
3.20476							4.17384		4.00322
3.22319							4.17525		4.0045
3.23013							4.18065		4.01286
3.2404							4.19669		4.06892
3.24191							4.22332		4.08067
3.24298							4.22779		4.09745
3.25296							4.24554		4.10755
3.26321							4.25805		4.10867
3.27117							4.26679		4.13991
3.28297							4.27973		4.14242
3.28871							4.2807		4.15863
3.28878							4.28099		4.18382
3.29788							4.30758		4.19936
3.30468							4.30794		4.23598
3.30822							4.30951		4.24675
3.31001							4.30995
3.31058							4.32945
3.32327							4.39229
3.33133							4.4036
3.35296							4.40842
3.35933							4.42607
3.36033							4.44766
3.37404							4.48978
3.37437							4.50702
3.39391							4.52027
3.40481							4.52036
3.41658							4.52938
3.41845							4.53958
3.43525							4.54727
3.43849
3.43987
3.446
3.45489
3.45761
3.4604
3.46641
3.47911
3.4926
3.49287
3.49409
3.50825
3.52779
3.5426
3.54611
3.55667
3.55766
3.55978
3.56706
3.58837
3.60098
3.60733
3.61242
3.61653
3.62032
3.6357
3.66848
3.69785
3.69875
3.70264
3.70708
3.71054
3.71221
3.73588
3.73774
3.74026
3.74285
3.74698
3.76722
3.7718
3.78879
3.80674
3.83148
3.83468
3.83771
3.85731
3.86558
3.87509
3.88867
3.89033
3.91726
3.9443
3.95129
3.95697
3.95802
3.97783
3.98436
3.98805
4.00949
4.0121
4.01237
4.04812
4.05364
4.06531
4.06628
4.08707
4.08824
4.09646
4.1046
4.11721
4.12034
4.12369
4.12832
4.15166
4.18098
4.19059
4.19265
4.1966
4.20501
4.21525
4.22645
4.23092
4.2523
4.28721
4.30254
4.31198
4.31622
4.33916

## Sheet: Figure 2H
Veh	Veh + ISRIB	Tg	Tg + ISRIB	HF	HF + ISRIB	0357	0357 + ISRIB	3610	3610 + ISRIB
0.496152	0.91725	0.696639	0.826497	0.455012	0.559794	0.561736	0.222439	0.334288	0.655347
0.740663	0.67794	0.464052	0.51404	0.462938	0.749746	0.389166	0.393261	0.429825	0.927771
0.31864	0.529908	0.203395	0.833755	0.47922	0.495105	0.650533	0.618518	0.461954	0.604408
0.424144	0.28396	0.566288	0.250573	0.519068	0.318071	0.421848	0.716428	0.468431	0.376077
0.700875	0.537224	0.670024	0.644465	0.667245	0.531864	0.404175	0.688253	0.454644	0.579525
0.591979	0.388407	0.678299	0.883079	0.408468	0.466007	0.66412	0.920854	0.737367	0.714924
0.483137	0.728011	0.419376	0.843207	0.206303	0.599777	0.648469	0.804546	0.727476	0.540011
0.501178	0.76578	0.7294	0.625978	0.483202	0.560995	0.519858	0.701872	0.399865	0.386301
0.695872	0.632537	0.598207	0.84139	0.152924	0.678409	0.582765	0.877689	0.27032	0.421499
0.603223	0.406356	0.320909	0.389159	0.341496	0.22838	0.682324	0.437007	0.650671	0.734859
0.637239	0.59567	0.520146	0.218717	0.554255	0.547141	0.570157	0.553602	0.613807	0.750519
0.719854	0.745149	0.181999	0.634404	0.401148	0.751296	0.479369	0.753821	0.541917	0.914483
0.734468	0.86851	0.624701	0.465232	0.683995	0.584925	0.512444	0.407811	0.584041	0.884578
0.837056	0.356882	0.641331	0.44862	0.558442	0.391502	0.663763	0.8053	0.777019	0.671547
0.768208	0.654104	0.474525	0.747736	0.48212	0.284345	0.693135	0.393493	0.478304	0.90422
0.760767	0.539104	0.755823	0.732866	0.564857	0.64915	0.608795	0.884881	0.636823	0.759003
0.716648	0.834691	0.38745	0.681118	0.207243	0.510881	0.493996	0.668481	0.532235	0.655734
0.754258	0.654269	0.196918	0.754923	0.57956	0.544659	0.450856	0.768871	0.269186	0.893346
0.587547	0.275945	0.437983	0.399022	0.583002	0.490682	0.607274	0.741748	0.244585	0.781619
0.726528	0.708744	0.154447	0.745105	0.622459	0.580592	0.483666	0.423354	0.311489	0.826142
0.805965	0.650515	0.48491	0.726618	0.261793	0.47606	0.185552	0.443823	0.489402	0.719412
0.509061	0.808746	0.681882	0.740719	0.676552	0.573834	0.376924	0.864347	0.583268	0.85351
0.8052	0.536	0.522401	0.684114	0.695417	0.304271	0.273838	0.744941	0.527717	0.741763
0.563453	0.562266	0.631285	0.834512	0.172244	0.664212	0.590117	0.64724	0.462442	0.659765
0.66534	0.631806	0.578627	0.457618	0.535085	0.375796	0.360477	0.742618	0.719776	0.868487
0.674462	0.503098	0.568502	0.564976	0.425973	0.319607	0.483655	0.611666	0.418247	0.795094
0.780485	0.419636	0.4553	0.394656	0.478843	0.60085	0.310196	0.31515	0.383871	0.643284
0.340212	0.504723	0.405512	0.750497	0.617657	0.303684	0.584181	0.751472	0.414658	0.837276
0.62884	0.657725	0.731483	0.871282	0.121054	0.238983	0.546648	0.641764	0.321412	0.887756
0.680138	0.608758	0.784703	0.747551	0.231833	0.283443	0.507355	0.381359	0.578802	0.713505
0.766032	0.575258	0.514559	0.571035	0.343198	0.415345	0.459711	0.460272	0.626146	0.813765
0.661419	0.824708	0.626046	0.254656	0.493687	0.745357	0.487027	0.613117	0.582773	0.556653
0.537396	0.468491	0.505691	0.716961	0.608283	0.672496	0.208583	0.819971	0.556839	0.276424
0.215094	0.552009	0.563516	0.728126	0.458789	0.668597	0.535946	0.316608	0.587923	0.854074
0.303226	0.367415	0.49181	0.699758	0.382399	0.318374	0.477285	0.862937	0.621054	0.291454
0.598673	0.502158	0.626146	0.194865	0.383862	0.498194	0.336803	0.543198	0.556435	0.637338
0.520956	0.428058	0.577521	0.528811	0.635115	0.656205	0.618954	0.697698	0.415069	0.930595
0.669123	0.913032	0.186642	0.926402	0.198989	0.240423	0.656113	0.559298	0.611727	0.522835
0.771403	0.686616	0.562957	0.809733	0.442039	0.643278	0.653711	0.608882	0.619668	0.468246
0.507968	0.245629	0.708772	0.468079	0.611642	0.678894	0.190061	0.876981	0.751999	0.321993
0.569784	0.500159	0.641854	0.64002	0.536103	0.654939	0.311106	0.477219	0.430529	0.727368
0.528501	0.597577	0.597253	0.785709	0.536823	0.387396	0.400772	0.5332	0.204895	0.717824
0.338607	0.254591	0.753434	0.699958	0.199589	0.717299	0.457243	0.260627	0.77558	0.498019
0.682877	0.574331	0.586169	0.482484	0.219387	0.634147	0.6195	0.560262	0.6453	0.581535
0.552711	0.338233	0.605057	0.904891	0.121747	0.341489	0.398415	0.649226	0.170367	0.564547
0.810654	0.733554	0.631964	0.745456	0.660353	0.684762	0.636587	0.667053	0.722456	0.801089
0.622836	0.465335	0.31803	0.420551	0.307722	0.75974	0.524668	0.522274	0.67121	0.815507
0.190183	0.692699	0.611666	0.885679	0.148889	0.140472	0.62891	0.282774	0.461801	0.646034
0.549019	0.512482	0.716874	0.303781	0.52177	0.560036	0.650103	0.807656	0.428367	0.57407
0.531038	0.640968	0.26525	0.769292	0.645216	0.152439	0.542406	0.49671	0.623455	0.8937
0.799893	0.624783	0.711638	0.82874	0.590627	0.162147	0.422991	0.826691	0.246496	0.753776
0.576994	0.638331	0.37188	0.281683	0.553988	0.572292	0.209364	0.632985	0.382951	0.45019
0.861496	0.779782	0.4379	0.923606	0.503608	0.496709	0.446735	0.621384	0.479169	0.779328
0.856385	0.770138	0.380001	0.470543	0.542692	0.249796	0.569472	0.591175	0.402571	0.561493
0.803321	0.245785	0.729708	0.260399	0.280707	0.625455	0.459979	0.177427	0.679268	0.782601
0.752439	0.687355	0.592796	0.595403	0.657233	0.441293	0.530715	0.849881	0.495239	0.850795
0.632393	0.721626	0.61767	0.459731	0.37722	0.572249	0.186727	0.541732	0.567541	0.850406
0.419281	0.694153	0.441052	0.775894	0.432281	0.730903	0.519156	0.814421	0.383133	0.690743
0.841699	0.38906	0.62974	0.366316	0.288085	0.274548	0.655351	0.617577	0.635406	0.291628
0.893705	0.903653	0.452646	0.927224	0.357665	0.419701	0.820001	0.610459	0.483555	0.790746
0.779531	0.615548	0.521879	0.372047	0.156872	0.430861	0.68357	0.597137	0.596304	0.567546
0.678684	0.332548	0.245752	0.890275	0.315001	0.554526	0.482441	0.7266	0.652426	0.549335
0.83061	0.753841	0.598542	0.81369	0.571935	0.159304	0.546905	0.540312	0.654028	0.339177
0.78696	0.765151	0.514376	0.452536	0.525976	0.627782	0.287814	0.656281	0.505757	0.552036
0.725873	0.619495	0.553978	0.775855	0.314797	0.606981	0.503711	0.691905	0.234749	0.727968
0.629902	0.514022	0.192801	0.806629	0.446137	0.238397	0.543573	0.744623	0.445438	0.802347
0.49818	0.555948	0.64087	0.603191	0.608727	0.490108	0.194437	0.186789	0.436661	0.469574
0.838397	0.338783	0.256995	0.914016	0.507686	0.459112	0.508068	0.514953	0.621011	0.633863
0.684945	0.6194	0.550052	0.857742	0.445235	0.304372	0.173237	0.484415	0.398112	0.625535
0.707049	0.757936	0.675509	0.861793	0.238103	0.156582	0.604601	0.752473	0.276368	0.769321
0.754995	0.278042	0.568886	0.765612	0.624487	0.478398	0.688916	0.296674	0.332345	0.701971
0.604432	0.819382	0.284326	0.821223	0.529899	0.638354	0.512048	0.234833	0.428375	0.90005
0.767658	0.752216	0.192879	0.807754	0.494716	0.66679	0.549848	0.262124	0.311898	0.730357
0.876978	0.917168	0.263481	0.507345	0.578712	0.242828	0.703737	0.720246	0.582194	0.780843
0.827269	0.542088	0.62795	0.781906	0.610058	0.226519	0.460341	0.512626	0.353537	0.758378
0.239546	0.58237	0.270907	0.786801	0.410019	0.170944	0.370555	0.796313	0.592891	0.778719
0.544514	0.307008	0.397391	0.878927	0.31689	0.614549	0.658556	0.574527	0.587903	0.253939
0.478773	0.892407	0.383189	0.364162	0.542367	0.737613	0.43051	0.810043	0.680503	0.536675
0.533085	0.614772	0.601311	0.50351	0.196065	0.32238	0.625592	0.770311	0.593647	0.693245
0.633271	0.870235	0.4158	0.824275	0.537356	0.654209	0.820983	0.895117	0.264636	0.469599
0.732825	0.650592	0.305693	0.744826	0.31293	0.298679	0.298724	0.597443	0.752692	0.786394
0.522982	0.676164	0.207531	0.801816	0.527012	0.278762	0.497722	0.443665	0.559504	0.579448
0.553281	0.41436	0.582337	0.677774	0.167625	0.500075	0.682813	0.683725	0.549507	0.29396
0.475153	0.536941	0.801593	0.594764	0.271489	0.431015	0.611551	0.795119	0.520585	0.567461
0.540024	0.310206	0.494828	0.875055	0.222025	0.626419	0.411859	0.795926	0.709552	0.424299
0.784103	0.848561	0.365939	0.450882	0.101332	0.351187	0.22844	0.679358	0.603309	0.423127
0.718353	0.484758	0.532573	0.780164	0.691775	0.586953	0.29431	0.235364	0.598821	0.512056
0.859555	0.363877	0.788524	0.468255	0.549539	0.657876	0.161656	0.56229	0.580403	0.374721
0.497759	0.517943	0.205784	0.664321	0.498243	0.659922	0.495765	0.59728	0.478318	0.607888
0.653438	0.612487	0.684736	0.632732	0.369678	0.481332	0.349836	0.211843	0.287614	0.533477
0.234478	0.345756	0.431663	0.41034	0.53485	0.595358	0.425045	0.23591	0.467872	0.329147
0.70334	0.399245	0.164174	0.912383	0.630844	0.14582	0.549987	0.810348	0.190269	0.358186
0.840382	0.740485	0.603435	0.711196	0.679932	0.45998	0.713702	0.821715	0.288417	0.786436
0.897557	0.713476	0.667417	0.710136	0.423291	0.570207	0.621894	0.648359	0.632107	0.274869
0.509373	0.630354	0.575496	0.93059	0.552717	0.558067	0.298904	0.671931	0.485507	0.732186
0.715303	0.864886	0.252672	0.663456	0.670822	0.161881	0.608531	0.602543	0.722938	0.69836
0.800035	0.60492	0.547765	0.277072	0.462416	0.446085	0.419646	0.44453	0.594441	0.691992
0.896559	0.594588	0.280209	0.540617	0.526841	0.185085	0.307264	0.871261	0.127522	0.666227
0.604457	0.680082	0.481082	0.351582	0.562078	0.353477	0.599277	0.55329	0.714271	0.895945
0.418408	0.698405	0.49988	0.670315	0.494256	0.178034	0.598815	0.61481	0.580677	0.213648
0.515682	0.621729	0.801623	0.498064	0.452364	0.58313	0.353509	0.569885	0.719928	0.595066
0.449218	0.434475	0.20851	0.574606	0.473127	0.274136	0.347947	0.344224	0.651868	0.568314
0.81618	0.582914	0.570437	0.659048	0.539223	0.359394	0.559011	0.287568	0.535576	0.527149
0.315858	0.712726	0.147553	0.905671	0.613652	0.165139	0.311608	0.778492	0.421757	0.499701
0.751336	0.43771	0.35348	0.796727	0.472333	0.180199	0.361418	0.847077	0.674208	0.440361
0.671632	0.837987	0.260574	0.517977	0.584251	0.339502	0.508934	0.395035	0.485224	0.756541
0.638399	0.730535	0.247905	0.884552	0.790126	0.595351	0.285619	0.644943	0.61324	0.570968
0.668779	0.799535	0.452523	0.847751	0.540283	0.667859	0.450252	0.718433	0.555621	0.538185
0.592321	0.456638	0.634235	0.748228	0.572661	0.770572	0.246778	0.774274	0.640384	0.5047
0.855099	0.734854	0.495242	0.217326	0.381147	0.599058	0.57477	0.330792	0.226489	0.90294
0.443645	0.62095	0.779045	0.449803	0.565903	0.331708	0.274855	0.637926	0.391528	0.764823
0.692905	0.665107	0.597916	0.190541	0.463776	0.849132	0.447851	0.442816	0.78746	0.73614
0.625086	0.923016	0.434326	0.664416	0.642589	0.695853	0.546612	0.771158	0.483216	0.641169
0.710119	0.615978	0.281514	0.571515	0.518272	0.516587	0.188425	0.528695	0.728861	0.760228
0.766409	0.775189	0.509828	0.506863	0.505221	0.676361	0.395992	0.416085	0.425786	0.710504
0.810433	0.39013	0.554293	0.873595	0.496152	0.629501	0.607625	0.480164	0.246514	0.232292
0.850055	0.430089	0.468606	0.82384	0.576826	0.5131	0.33699	0.414725	0.607428	0.411839
0.429286	0.68858	0.305555	0.698469	0.549316	0.578827	0.295262	0.374311	0.431327	0.43454
0.651372	0.299245	0.47418	0.780369	0.422891	0.418823	0.622355	0.270073	0.684371	0.240773
0.449824	0.810539	0.462853	0.70342	0.121158	0.381307	0.61607	0.370771	0.520705	0.789013
0.477642	0.537742	0.613344	0.706672	0.561119	0.36234	0.295046	0.887298	0.706835	0.524404
0.321975	0.747263	0.726906	0.48841	0.566497	0.643548	0.241667	0.39052	0.365727	0.634107
0.853633	0.55582	0.490159	0.858272	0.365595	0.778102	0.410673	0.572795	0.327765	0.785688
0.718801	0.51603	0.528626	0.552659	0.597028	0.255556	0.312721	0.313631	0.748003	0.910341
0.836874	0.313201	0.554878	0.826867	0.688863	0.54969	0.662938	0.730263	0.161997	0.253079
0.571227	0.721736	0.375505	0.448232	0.148805	0.744026	0.347264	0.53361	0.434857	0.852605
0.711634	0.68163	0.664786	0.624083	0.139091	0.648496	0.370824	0.621569	0.525523	0.609373
0.583635	0.333758	0.68528	0.534064	0.42225	0.680101	0.516225	0.805943	0.892979	0.57443
0.838893	0.443129	0.553814	0.872286	0.476362	0.738309	0.617049	0.649176	0.409245	0.585196
0.710727	0.291053	0.658697	0.877626	0.240131	0.521378	0.23339	0.697328	0.40336	0.173195
0.810893	0.292342	0.825177	0.824308	0.533049	0.233476	0.405653	0.463167	0.352485	0.767562
0.534063	0.607598	0.483461	0.695935	0.444733	0.288414	0.382303	0.480191	0.622309	0.250892
0.572787	0.788731	0.520505	0.746761	0.598161	0.46266	0.620362	0.392386	0.726752	0.511367
0.779784	0.682137	0.519215	0.57295	0.277377	0.550352	0.50416	0.506692	0.320147	0.680622
0.575247	0.543392	0.309506	0.591985	0.506011	0.473697	0.729183	0.570311	0.24164	0.720465
0.700048	0.792283	0.429464	0.748255	0.436957	0.668063	0.366669	0.682375	0.503256	0.541735
0.660407	0.809477	0.609908	0.786371	0.577766	0.556793	0.438577	0.720408	0.708689	0.692845
0.573716	0.588772	0.619362	0.690693	0.52252	0.482858	0.601692	0.695954	0.49412	0.744625
0.498298	0.364377	0.711248	0.866998	0.424779	0.742518	0.509768	0.805374	0.643209	0.660226
0.786101	0.50209	0.821181	0.646657	0.39698	0.425508	0.316878	0.642248	0.48536	0.805669
0.280998	0.589333	0.606472	0.873617	0.644506	0.621581	0.450222	0.609079	0.409448	0.7762
0.770687	0.574654	0.571917	0.792599	0.667764	0.667152	0.457443	0.408807	0.638749	0.513305
0.546565	0.633603	0.583478	0.414484	0.556237	0.731681	0.417696	0.578907	0.600546	0.716126
0.533484	0.700593	0.410315	0.843031	0.500751	0.583677	0.429005	0.79115	0.569576	0.907586
0.460688	0.708543	0.548628	0.676119	0.556273	0.589319	0.408144	0.791558	0.65995	0.438776
0.511058	0.576419	0.640844	0.771057	0.316491	0.605578	0.664626	0.517764	0.441562	0.583512
0.558999	0.391075	0.530651	0.346164	0.489872	0.616496	0.541649	0.529726	0.433506	0.221415
0.565335	0.20592	0.485029	0.88915	0.215518	0.658581	0.545289	0.249477	0.559552	0.478253
0.573867	0.489098	0.515148	0.764723	0.17715	0.59929	0.50495	0.869015	0.307555	0.59503
0.247218	0.741607	0.497978	0.319112	0.482022	0.678941	0.659558	0.641323	0.613359	0.603787
0.717817	0.420051	0.220093	0.705547	0.637977	0.734034	0.614638	0.843924	0.641371	0.745735
0.504084	0.278221	0.514396	0.655133	0.629843	0.581804	0.588531	0.744657	0.562011	0.755937
0.31855	0.341425	0.519532	0.863669	0.41166	0.499639	0.453089	0.599027	0.239025	0.37095
0.365625	0.493686	0.754887	0.448485	0.384898	0.730399	0.327978	0.457225	0.305325	0.605758
0.773906	0.579244	0.514293	0.553164	0.576471	0.560937	0.26557	0.906689	0.249589	0.72026
0.2611	0.19487	0.455471	0.427434	0.444155	0.199545	0.503986	0.597928	0.578405	0.938616
0.910786	0.350225	0.734215	0.638737	0.540877	0.771355	0.657928	0.546413	0.587899	0.793437
0.554464	0.368859	0.660882	0.319013	0.729503	0.685869	0.247201	0.587412	0.548911	0.66817
0.871554	0.39796	0.550057	0.794448	0.638218	0.654608	0.334582	0.602672	0.570398	0.924108
0.715456	0.602556	0.558722	0.886642	0.662767	0.476526	0.608054	0.54735	0.516259	0.427267
0.737753	0.613145	0.551175	0.361587	0.118986	0.871347	0.609695	0.268095	0.240601	0.800781
0.230608	0.731975	0.554374	0.75266	0.653124	0.427708	0.487126	0.784134	0.644378	0.621905
0.456956	0.540867	0.626456	0.919925	0.143558	0.584379	0.380581	0.581813	0.53019	0.932207
0.663158	0.324038	0.7883	0.186653	0.565308	0.451491	0.474494	0.583332	0.262576	0.557779
0.190996	0.407394	0.475795	0.559139	0.528356	0.689977	0.373342	0.272362	0.634082	0.450781
0.699533	0.509096	0.459199	0.807445	0.507077	0.429113	0.516202	0.572792	0.317544	0.521805
0.744874	0.685371	0.401648	0.720076	0.146993	0.843835	0.187194	0.816566	0.423723	0.894855
0.92358	0.621438	0.634942	0.694744	0.145748	0.828787	0.728433	0.786996	0.600043	0.79575
0.805	0.938935	0.20808	0.695902	0.20487	0.260391	0.649592	0.5267	0.809704	0.55961
0.680827	0.740582	0.523225	0.782691	0.459172	0.666743	0.445183	0.585158	0.46012	0.590343
0.31686	0.697253	0.304008	0.604402	0.458692	0.593544	0.504214	0.908566	0.525079	0.42801
0.675781	0.71365	0.400396	0.891185	0.41197	0.718661	0.364754	0.696841	0.638279	0.857016
0.60067	0.757172	0.154463	0.705162	0.497422	0.634053	0.452883	0.44103	0.653913	0.777699
0.363017	0.596867	0.738715	0.399841	0.314121	0.747764	0.619382	0.795048	0.327794	0.505815
0.535067	0.811103	0.457657	0.528354	0.287474	0.469152	0.481377	0.719057	0.39524	0.764408
0.34563	0.749348	0.339907	0.820006	0.346555	0.818507	0.621369	0.276008	0.599269	0.685748
0.55065	0.872179	0.47141	0.747084	0.281837	0.280413	0.646376	0.731256	0.664089	0.536
0.581234	0.908859	0.335026	0.393256	0.326566	0.813867	0.398793	0.629325	0.395622	0.941846
0.79867	0.633478	0.663615	0.843562	0.202281	0.561065	0.596914	0.308227	0.326464	0.789412
0.597407	0.56129	0.501674	0.481657	0.545052	0.821767	0.697429	0.568062	0.346048	0.895927
0.839479	0.33837	0.300481	0.717176	0.663883	0.594956	0.249824	0.855935	0.442778	0.743322
0.756621	0.417136	0.165976	0.751113	0.54786	0.854524	0.377605	0.284103	0.598513	0.433511
0.439052	0.623697	0.465327	0.711442	0.199564	0.789802	0.600404	0.847121	0.631132	0.893921
0.741836	0.895936	0.637074	0.669381	0.386875	0.818014	0.526721	0.836401	0.526149	0.831428
0.750571	0.388768	0.506148	0.644123	0.457417	0.613739	0.286897	0.54582	0.17593	0.814833
0.750359	0.770464	0.556658	0.872853	0.124712	0.628031	0.812655	0.7951	0.143466	0.731482
0.425319	0.416892	0.700257	0.589926	0.450881	0.822949	0.311114	0.675161	0.254757	0.714132
0.589921	0.479094	0.423964	0.83233	0.145263	0.386985	0.677642	0.781754	0.422455	0.879596
0.744484	0.4475	0.494893	0.391883	0.660392	0.633202	0.478169	0.680828	0.293872	0.528381
0.828745	0.23761	0.585829	0.722945	0.439522	0.691928	0.230951	0.56005	0.639788	0.845983
0.465885	0.312699	0.698792	0.553456	0.498587	0.919829	0.494824	0.787851	0.201471	0.765486
0.591473	0.714917	0.493542	0.268464	0.469955	0.48833	0.474141	0.676555	0.777846	0.288971
0.438738	0.463181	0.562434	0.918127	0.324772	0.301263	0.128575	0.662363	0.623856	0.54385
0.599011	0.816788	0.678215	0.776447	0.438656	0.60751	0.497291	0.765035	0.536926	0.646902
0.602123	0.348186	0.406236	0.728189	0.587403	0.460448	0.582838	0.532509	0.619467	0.762097
0.300999	0.461197	0.586222	0.811851	0.163611	0.636597	0.51481	0.764655	0.649268	0.686616
0.616512	0.788988	0.172607	0.219151	0.639723	0.821184	0.632064	0.441907	0.440304	0.676483
0.75034	0.588868	0.628906	0.584299	0.190819	0.477598	0.591291	0.404672	0.63325	0.485409
0.38717	0.742029	0.64209	0.675772	0.661066	0.852046	0.599768	0.546075	0.344256	0.451497
0.937707	0.782475	0.417104	0.424987	0.307742	0.510864	0.520733	0.552782	0.519236	0.634642
0.235577	0.75157	0.652839	0.352294	0.597083	0.419205	0.293762	0.749036	0.223923	0.693005
0.826246	0.522712	0.491718	0.677394	0.384221	0.675643	0.564067	0.612804	0.582964	0.515575
0.685806	0.637682	0.553022	0.760719	0.269894	0.362798	0.338765	0.754452	0.66199	0.815118
0.665908	0.414029	0.420657	0.259949	0.502796	0.790816	0.559397	0.821657	0.434793	0.590561
0.78764	0.750381	0.623172	0.811836	0.546444	0.471282	0.720095	0.328789	0.473791	0.526146
0.36524	0.67404	0.740174	0.7112	0.575241	0.770903	0.413615	0.813737	0.436938	0.698215
0.483666	0.469283	0.383267	0.748985	0.732986	0.563101	0.739322	0.684065	0.485736	0.860504
0.905566	0.453262	0.335658	0.815869	0.334348	0.670229	0.302727	0.439252	0.644045	0.758689
0.857743	0.883588	0.377986	0.594518	0.307541	0.555904	0.398147	0.532526	0.617297	0.711631
0.631928	0.569109	0.281276	0.666772	0.316489	0.662196	0.57508	0.731509	0.377541	0.614931
0.832944	0.632655	0.457875	0.235615	0.332501	0.750307	0.715411	0.569206	0.636771	0.59848
0.744749	0.742154	0.638393	0.247705	0.330181	0.697993	0.336538	0.408991	0.509459	0.555985
0.293118	0.36519	0.542849	0.626963	0.482311	0.754145	0.272352	0.611838	0.662404	0.707475
0.741536	0.385585	0.388131	0.240472	0.557518	0.332459	0.25201	0.769838	0.576509	0.542487
0.509089	0.63806	0.50027	0.503538	0.392733	0.14479	0.453969	0.52613	0.167556	0.466434
0.810438	0.835861	0.556492	0.559619	0.253906	0.801956	0.491655	0.56361	0.587762	0.753787
0.823263	0.488141	0.767884	0.802071	0.351059	0.409117	0.544995	0.837811	0.357329	0.334557
0.501364	0.941679	0.528282	0.856887	0.547811	0.816654	0.594	0.605414	0.44909	0.918799
0.417794	0.738442	0.738935	0.768418	0.59362	0.268996	0.293903	0.357548	0.336562	0.45572
0.727056	0.838181	0.576992	0.488813	0.772041	0.710936	0.497729	0.850139	0.171052	0.44978
0.452288	0.61026	0.452649	0.79244	0.620409	0.594046	0.64864	0.629756	0.639036	0.506927
0.887128	0.712902	0.302644	0.445324	0.59469	0.584698	0.336828	0.496431	0.642763	0.615351
0.470762	0.539993	0.612801	0.508231	0.537336	0.861298	0.539487	0.251162	0.612561	0.713859
0.353036	0.688824	0.554626	0.208819	0.584365	0.802329	0.513572	0.368761	0.648036	0.537612
0.755301	0.327234	0.517287	0.767234	0.546475	0.784507	0.48542	0.496083	0.591704	0.355573
0.874897	0.382573	0.628133	0.731057	0.501061	0.68517	0.497475	0.708067	0.597395	0.629427
0.911659	0.523358	0.475529	0.875945	0.593193	0.547175	0.583997	0.695847	0.505301	0.587111
0.6488	0.606891	0.569852	0.590794	0.284483	0.612556	0.628054	0.675089	0.534026	0.846322
0.837415	0.676492	0.479884	0.717889	0.246713	0.136855	0.664677	0.510631	0.281149	0.556248
0.71021	0.575517	0.380497	0.536721	0.602981	0.211661	0.637146	0.754996	0.401834	0.89836
0.770831	0.676638	0.508936	0.606514	0.438671	0.859214	0.438028	0.726592	0.53538	0.447943
0.722493	0.467274	0.50617	0.34469	0.417854	0.597967	0.360842	0.581262	0.588918	0.853118
0.732085	0.468001	0.303326	0.628274	0.174075	0.754077	0.460648	0.792089	0.699395	0.854058
0.686237	0.638426	0.572151	0.845421	0.613867	0.791564	0.22211	0.76146	0.45198	0.523903
0.770941	0.377541	0.414718	0.373567	0.63846	0.394499	0.682473	0.401064	0.424542	0.931016
0.649781	0.601799	0.697047	0.763464	0.735425	0.738889	0.692537	0.868622	0.535299	0.567389
0.67312	0.651485	0.500597	0.367444	0.774222	0.242702	0.614236	0.548426	0.571554	0.744151
0.85473	0.248971	0.204629	0.808121	0.257488	0.60383	0.385097	0.552427	0.68544	0.626952
0.500238	0.561694	0.622202	0.34991	0.16625	0.448987	0.73275	0.578031	0.673366	0.533433
0.709044	0.316138	0.596176	0.500015	0.328997	0.792991	0.247974	0.293244	0.609208	0.93351
0.652138	0.239854	0.50259	0.352205	0.190379	0.283976	0.493561	0.269714	0.315791	0.590931
0.835855	0.52373	0.529367	0.256655	0.335759	0.409555	0.195083	0.796222	0.423404	0.939973
0.626839	0.751647	0.553194	0.545939	0.204985	0.650766	0.73291	0.647047	0.676547	0.843228
0.62919	0.566262	0.535929	0.791108	0.769164	0.224327	0.647585	0.432616	0.638272	0.635303
0.347964	0.590531	0.632932	0.868539	0.462175	0.61658	0.654255	0.426155	0.515716	0.712113
0.705338	0.502513	0.379712	0.577763	0.565254	0.693129	0.655275	0.855708	0.365386	0.701228
0.792343	0.782333	0.57838	0.815764	0.160778	0.829997	0.196716	0.740795	0.256196	0.57172
0.651081	0.736106	0.31086	0.500024	0.140599	0.452447	0.480832	0.443586	0.66219	0.908072
0.551037	0.897592	0.474856	0.538618	0.214233	0.884818	0.479117	0.953369	0.296798	0.82842
0.873822	0.385168	0.481675	0.678861	0.660705	0.562797	0.535727	0.28302	0.162713	0.877965
0.641382	0.306291	0.418194	0.357711	0.227482	0.385664	0.459914	0.599414	0.337754	0.613528
0.731653	0.647414	0.62314	0.637481	0.36048	0.734158	0.528816	0.856878	0.38865	0.385417
0.700569	0.636666	0.171971	0.939161	0.571905	0.790788	0.606116	0.813693	0.601138	0.221238
0.565142	0.452782	0.192221	0.483078	0.626079	0.883373	0.434091	0.698384	0.525455	0.321999
0.830664	0.643661	0.607414	0.523595	0.482253	0.559187	0.574464	0.543281	0.559548	0.925465
0.509654	0.612453	0.301315	0.86259	0.580862	0.628546	0.587972	0.252199	0.48978	0.738861
0.703602	0.75662	0.274159	0.365924	0.436282	0.585899	0.693383	0.2327	0.580732	0.812109
0.867063	0.659688	0.379364	0.498144	0.676215	0.535118	0.673011	0.656965	0.210604	0.853127
0.645205	0.502111	0.47126	0.77995	0.50377	0.30022	0.299592	0.84534	0.603194	0.555339
0.413433	0.666319	0.613656	0.568972	0.451538	0.844753	0.435219	0.338006	0.395788	0.557647
0.350185	0.179231	0.398644	0.524838	0.763962	0.524292	0.569434	0.585011	0.48106	0.762256
0.707722	0.585565	0.545272	0.577925	0.591935	0.733915	0.459267	0.510559	0.568788	0.496118
0.645274	0.58004	0.319201	0.618743	0.422188	0.534965	0.406066	0.67524	0.571635	0.940005
0.549807	0.642042	0.545469	0.864046	0.485498	0.790064	0.510009	0.702306	0.556708	0.844629
0.328568	0.600645	0.222111	0.786884	0.343852	0.19136	0.875984	0.750342	0.314272	0.458553
0.268497	0.480677	0.752789	0.410421	0.683602	0.558328	0.572215	0.75911	0.574793	0.691379
0.878329	0.525591	0.519046	0.830633	0.438554	0.58512	0.605098	0.627696	0.496059	0.829704
0.890978	0.397812	0.515522	0.589299	0.50461	0.769683	0.264237	0.647751	0.543664	0.671236
0.518745	0.499863	0.729736	0.711092	0.1373	0.391097	0.735314	0.310893	0.29736	0.495534
0.310405	0.594836	0.495084	0.878659	0.610771	0.698772	0.474716	0.850372	0.342919	0.680106
0.716561	0.402912	0.208985	0.639	0.271729	0.544437	0.450926	0.497981	0.393478	0.813761
0.636704	0.547449	0.180662	0.390127	0.628586	0.396638	0.599593	0.173628	0.65875	0.705856
0.377221	0.462728	0.558746	0.633539	0.53134	0.600869	0.479183	0.419021	0.244512	0.65308
0.554976	0.60044	0.476094	0.308859	0.275214	0.584689	0.46748	0.643135	0.490127	0.495541
0.751564	0.560406	0.453375	0.824893	0.47165	0.523006	0.711706	0.797274	0.218807	0.55865
0.83819	0.548393	0.683639	0.432528	0.734272	0.36162	0.355683	0.403793	0.570498	0.729398
0.552251	0.337639	0.19614	0.674123	0.535424	0.470959	0.744345	0.759848	0.320799	0.501498
0.859349	0.453289	0.434324	0.711328	0.45373	0.686217	0.302816	0.550736	0.455666	0.494717
0.47043	0.72117	0.351257	0.766595	0.208535	0.62428	0.204601	0.459741	0.568675	0.749165
0.8248	0.398086	0.514525	0.535645	0.423215	0.708739	0.416508	0.668351	0.615608	0.344812
0.71352	0.537027	0.511686	0.381045	0.397909	0.655948	0.507919	0.454001	0.710605	0.697542
0.806372	0.863514	0.371771	0.3194	0.471477	0.701955	0.543939	0.649652	0.176333	0.549651
0.530527	0.57266	0.417599	0.749306	0.541621	0.67253	0.557735	0.724638	0.67135	0.891182
0.72066	0.870477	0.54959	0.728017	0.36675	0.592667	0.260314	0.340232	0.574541	0.852826
0.32118	0.736182	0.712107	0.368249	0.574769	0.379844	0.162034	0.740063	0.823999	0.448665
0.368678	0.401537	0.505486	0.645683	0.4244	0.372494	0.122263	0.396476	0.710159	0.791891
0.802638	0.472865	0.215352	0.590551	0.51282	0.737271	0.45456	0.461421	0.573667	0.760265
0.545143	0.233019	0.265113	0.717461	0.120102	0.565902	0.263631	0.264644	0.35827	0.887856
0.763485	0.47071	0.666211	0.907216	0.554477	0.509524	0.441435	0.453675	0.434726	0.783255
0.638686	0.810246	0.215747	0.563857	0.355088	0.449605	0.496667	0.624882	0.705501	0.68282
0.844497	0.858873	0.37395	0.563144	0.451669	0.471987	0.175852	0.64127	0.619747	0.521416
0.575149	0.48142	0.622213	0.606181	0.141823	0.562805	0.309428	0.497896	0.404771	0.486064
0.866823	0.651936	0.425722	0.682627	0.671321	0.59281	0.78776	0.81322	0.13371	0.720343
0.771093	0.321432	0.328386	0.402537	0.394034	0.647111	0.336661	0.806673	0.521821	0.530828
0.77066	0.867438	0.62802	0.470271	0.580261	0.791437	0.560294	0.691576	0.673232	0.524404
0.315296	0.251377	0.708595	0.805847	0.586	0.778728	0.574345	0.743994	0.433452	0.666984
0.579256	0.514509	0.626348	0.553141	0.582952	0.347759	0.411078	0.59558	0.434416	0.727322
0.314445	0.647662	0.284273	0.785123	0.590918	0.699169	0.447263	0.912544	0.528296	0.555606
0.669489	0.774864	0.432173	0.756068	0.607679	0.816074	0.244206	0.491069	0.268897	0.913414
0.528573	0.839039	0.669889	0.60336	0.753013	0.182211	0.511244	0.551288	0.570314	0.869938
0.301539	0.658387	0.366587	0.577807	0.374837	0.805641	0.249284	0.286656	0.58472	0.872843
0.901571	0.693115	0.247962	0.784049	0.451852	0.900969	0.459238	0.85494	0.378417	0.470886
0.655731	0.591873	0.523174	0.761436	0.604558	0.585093	0.692019	0.675931	0.441465	0.819308
0.620061	0.728485	0.32541	0.825004	0.527167	0.745326	0.313297	0.832817	0.437043	0.916743
0.828882	0.767596	0.539801	0.551473	0.586874	0.742564	0.41262	0.845862	0.546459	0.679385
0.504103	0.397731	0.458542	0.653446	0.674323	0.51423	0.565728	0.756163	0.456675	0.466487
0.691395	0.567665	0.367284	0.515263	0.625712	0.699229	0.364028	0.707737	0.737552	0.377029
0.550847	0.35733	0.185363	0.615683	0.186853	0.801614	0.252525	0.657145	0.263367	0.608327
0.858698	0.480039	0.163027	0.315131	0.356804	0.631044	0.638174	0.816242	0.271153	0.530059
0.661646	0.487072	0.348517	0.615734	0.508894	0.719021	0.39288	0.620881	0.207759	0.248186
0.712034	0.653733	0.607495	0.78987	0.549888	0.72151	0.703448	0.720074	0.529849	0.590306
0.593887	0.795172	0.612637	0.364784	0.28061	0.569959	0.601928	0.273951	0.593594	0.379889
0.711364	0.658606	0.301765	0.330285	0.186942	0.568082	0.855543	0.688535	0.482567	0.866453
0.564009	0.284813	0.700643	0.340369	0.120082	0.664431	0.522981	0.378079	0.357969	0.905696
0.50025	0.775411	0.395592	0.792428		0.705986	0.524294	0.25845	0.222963	0.924646
0.688373	0.464356	0.518029	0.863421		0.794457	0.359957	0.550018	0.347706	0.714145
0.47343	0.234718	0.683732	0.585931		0.737628	0.578329	0.484982	0.397161	0.306901
0.388391	0.753332	0.463162	0.302403		0.797271	0.425405	0.839355	0.482983	0.630239
0.465199	0.604175	0.730079	0.958154		0.737977	0.777156	0.283918	0.658208	0.623386
0.907438	0.876295	0.414558	0.696851		0.554967	0.522048	0.736445	0.520394	0.573023
0.813317	0.417322	0.468487	0.872301		0.516191	0.648731	0.824217	0.46096	0.2182
0.674162	0.627523	0.612731	0.748047		0.284367	0.697249	0.402415	0.647439	0.728301
0.347515	0.556844	0.385632	0.657379		0.717569	0.460302	0.283132	0.542443	0.800782
0.769551	0.60315	0.529615	0.732445		0.610638	0.667212	0.784144	0.334788	0.632058
0.404771	0.632939	0.696399	0.70269		0.868397	0.4685	0.72371	0.28663	0.690797
0.391131	0.701742	0.512005	0.554147		0.659812	0.577405	0.691226	0.478255	0.690809
0.637986	0.294367	0.373925	0.441389		0.417695	0.282184	0.592293	0.334636	0.423119
0.742125	0.344778	0.24296	0.429988		0.876195	0.72059	0.529406	0.459704	0.82889
0.389309	0.416348	0.546106	0.612459		0.63889	0.543219	0.861029	0.375741	0.843373
0.734553	0.747715	0.582413	0.710458		0.866399	0.653251	0.947647	0.301241	0.628355
0.493309	0.899983	0.392232	0.739465		0.691689	0.301616	0.915729	0.247272	0.588354
0.786967	0.920799	0.365	0.844265		0.825874	0.356222	0.500861	0.358005	0.802895
0.40477	0.24559	0.626834	0.590292		0.796861	0.531796	0.728494	0.471369	0.933948
0.353974	0.489415	0.161177	0.745231		0.725123	0.57384	0.678267	0.343728	0.419304
0.65876	0.663392	0.383014	0.89296		0.616897	0.479143	0.879702	0.684994	0.85653
0.862838	0.299071	0.289301	0.27408		0.882631	0.664901	0.76321	0.409136	0.620484
0.458251	0.871034	0.251924	0.899934		0.526578	0.55382	0.340388	0.660422	0.831181
0.844201	0.49981	0.568189	0.472761		0.734394	0.717299	0.59484	0.571113	0.507003
0.765788	0.455042	0.378711	0.450785		0.881265	0.510109	0.471755	0.565401	0.772508
0.690705	0.385217	0.437908	0.862758		0.892807	0.186028	0.675375	0.69389	0.552991
0.658641	0.310953	0.777472	0.694691		0.683391	0.504092	0.213	0.515733	0.886475
0.549915	0.228144	0.596871	0.685111		0.552264	0.243909	0.760367	0.55206	0.894019
0.576904	0.481748	0.331248	0.351701		0.350322	0.190841	0.251052	0.584671	0.7145
0.653286	0.742877	0.56328	0.64751		0.467375	0.408169	0.68119	0.410054	0.792537
0.697745	0.67363	0.594021	0.524554		0.258643	0.557251	0.846684	0.484574	0.52994
0.631211	0.299889	0.49618	0.791912		0.72407	0.615263	0.345259	0.546869	0.52769
0.60162	0.254452	0.506551	0.635037		0.543939	0.351071	0.757013	0.569839	0.563891
0.797889	0.483582	0.676914	0.90493		0.316689	0.319605	0.717437	0.656701	0.543559
0.402661	0.711753	0.214223	0.70029		0.752734	0.594806	0.778111	0.502133	0.574529
0.644362	0.781812	0.467152	0.628642		0.661698	0.603167	0.583148	0.530793	0.889682
0.624069	0.301716	0.585485	0.804952		0.923279	0.387967	0.498826	0.570234	0.885272
0.533533	0.782185	0.238466	0.710673		0.59456	0.412596	0.64451	0.445195	0.200238
0.271858	0.386933	0.62401	0.816722		0.369966	0.565385	0.542945	0.19753	0.848124
0.77426	0.792815	0.722223	0.484482		0.685704	0.671162	0.534154	0.443894	0.648738
0.813654	0.81437	0.351039	0.509636		0.685342	0.756767	0.479228	0.665766	0.916915
0.632151	0.835274	0.305976	0.591927		0.584705	0.549313	0.524272	0.364961	0.682424
0.823265	0.75269	0.384075	0.5765		0.461033	0.32056	0.507958	0.419992	0.776365
0.617422	0.564228	0.641817	0.686803		0.350963	0.616414	0.262518	0.503236	0.500455
0.338062	0.654096	0.432755	0.518919		0.505122	0.482784	0.805819	0.721273	0.281417
0.677268	0.698811	0.140387	0.505355		0.397744	0.27295	0.5951	0.504589	0.526562
0.768023	0.516173	0.53573	0.608966		0.79227	0.722151	0.668941	0.318154	0.894561
0.405484	0.711203	0.253935	0.347092		0.848847	0.5223	0.500456	0.61184	0.650182
0.535849	0.467809	0.273103	0.584882		0.639728	0.187986	0.417559	0.474948	0.738496
0.731501	0.632305	0.427763	0.692262		0.758848	0.591574	0.842871	0.373054	0.221707
0.364044	0.64852	0.595226	0.485959		0.540853	0.328501	0.393681	0.60441	0.836448
0.614027	0.642929	0.607821	0.349334		0.519419	0.813364	0.529261	0.58354	0.379291
0.41116	0.58155	0.504558	0.670514		0.676329	0.236259	0.855479	0.508485	0.66684
0.684776	0.671094	0.485752	0.886231		0.938823	0.603378	0.609241	0.424425	0.739679
0.547161	0.418722	0.68275	0.663847		0.501867	0.129773	0.604113	0.499812	0.783825
0.725379	0.552152	0.368948	0.582743		0.3652	0.243389	0.538591	0.375551	0.667872
0.917982	0.611394	0.630124	0.826641		0.846493	0.519912	0.825849	0.463602	0.711617
0.610537	0.37216	0.39249	0.84178		0.430516	0.570869	0.825719	0.603057	0.704027
0.756106	0.634221	0.473179	0.724017		0.82314	0.570847	0.266053	0.688456	0.325311
0.90266	0.572767	0.690429	0.554607		0.621981	0.647519	0.724951	0.273944	0.468446
0.576035	0.337798	0.201184	0.847421		0.880527	0.158072	0.781205	0.194672	0.233447
0.635604	0.319478	0.20766	0.74924		0.775604	0.135469	0.553709	0.529054	0.861408
0.373845	0.226978	0.480681	0.747053		0.846538	0.310866	0.563652	0.361122	0.859564
0.275459	0.427923	0.256047	0.540205		0.60857	0.512387	0.798166	0.594601	0.820106
0.694508	0.562281	0.380112	0.746215		0.659721	0.330448	0.377661	0.451945	0.393002
0.451248	0.463827	0.613246	0.660977		0.787714	0.458874	0.727652	0.585561	0.566354
0.271569	0.735698	0.471624	0.229862		0.644518	0.664309	0.690819	0.160377	0.805843
0.759417	0.641169	0.336378	0.432522		0.495967	0.631708	0.513699	0.403509	0.912326
0.747965	0.718996	0.489796	0.939341		0.350872	0.361105	0.311154	0.285919	0.604255
0.756687	0.809487	0.781809	0.45938		0.321415	0.501898	0.793009	0.157762	0.660565
0.68402	0.716219	0.570111	0.723708		0.635147	0.696048	0.447945	0.260679	0.60485
0.936991	0.801483	0.570382	0.704875		0.189048	0.708778	0.539443	0.476007	0.876511
0.565209	0.873387	0.571723	0.6656		0.79901	0.891179	0.270552	0.496853	0.811432
0.607231	0.778111	0.70498	0.622698		0.886252	0.849788	0.741656	0.685163	0.274959
0.652347	0.44468	0.636336	0.269428		0.43855	0.653543	0.730254	0.452205	0.703283
0.347087	0.716234	0.681893	0.595256		0.517674	0.634548	0.679752	0.590853	0.646175
0.516265	0.684593	0.460312	0.688882		0.637058	0.608271	0.5651	0.501669	0.746181
0.741047	0.6508	0.462377	0.679825		0.765611	0.471162	0.809625	0.234054	0.61454
0.840984	0.526892	0.614473	0.290605		0.308407	0.704522	0.691406	0.417553	0.696623
0.610241	0.75733	0.554571	0.71996		0.206096	0.523143	0.8298	0.64542	0.717453
0.815946	0.76069	0.226174	0.395929		0.881107	0.498079	0.627373	0.545734	0.890881
0.6457	0.390668	0.350621	0.811543		0.595882	0.556382	0.579227	0.641373	0.812014
0.807345	0.638167	0.275377	0.515382		0.650797	0.573167	0.283494	0.609938	0.555648
0.397662	0.304895	0.612393	0.526055		0.594736	0.456466	0.599597	0.505527	0.401351
0.412718	0.406122	0.551976	0.829568		0.279487	0.585346	0.640119	0.600039	0.532351
0.497523	0.269099	0.329685	0.804932		0.478067	0.451494	0.598575	0.400339	0.613434
0.91865	0.217906	0.282401	0.70454		0.878006	0.537347	0.473087	0.422658	0.818135
0.632272	0.527897	0.497455	0.90951		0.451072	0.642431	0.768089	0.630952	0.727442
0.313237	0.665272	0.729326	0.791751		0.675459	0.446161	0.308111	0.45091	0.538888
0.742462	0.71771	0.683007	0.61903		0.647944	0.618168	0.785269	0.607	0.665389
0.950641	0.889505	0.536693	0.722398		0.210307	0.334568	0.346824	0.533286	0.801194
0.518319	0.64568	0.443655	0.793082		0.68869	0.548644	0.63699	0.130064	0.654566
0.657144	0.719142	0.489076	0.752928		0.454433	0.499105	0.350396	0.36331	0.570087
0.563001	0.918428	0.413447	0.392617		0.867909	0.615627	0.342938	0.247524	0.602238
0.688884	0.588194	0.151932	0.26138		0.547944	0.694887	0.861515	0.583472	0.256836
0.23189	0.465474	0.344752	0.557779		0.730537	0.378825	0.743785	0.426418	0.695044
0.812663	0.731973	0.193648	0.802384		0.55307	0.82755	0.73345	0.408635	0.881997
0.358814	0.816824	0.746123	0.343504		0.663433	0.625149	0.513708	0.582599	0.536619
0.468648	0.512631	0.349593	0.8011		0.631671	0.161251	0.390626	0.483707	0.897638
0.931651	0.536703	0.282962	0.759033		0.57722	0.261977	0.24345	0.401151	0.951609
0.590841	0.733572	0.301838	0.926622		0.8157	0.624753	0.799782	0.58332	0.695164
0.659452	0.531326	0.508066	0.939619		0.277305	0.176814	0.359377	0.560358	0.738923
0.367691	0.821392	0.524349	0.796098		0.534709	0.520142	0.443577	0.638821	0.859237
0.480954	0.511099	0.330141	0.527286		0.603622	0.753018	0.448411	0.305464	0.275724
0.340427	0.829224	0.155548	0.652855		0.229719	0.495043	0.725093	0.467488	0.709721
0.762609	0.609154	0.336952	0.470244		0.833522	0.516715	0.582555	0.509352	0.619366
0.713698	0.752728	0.433652	0.274319		0.493042	0.538851	0.319743	0.537152	0.611807
0.883998	0.767293	0.68298	0.430798		0.692828	0.616736	0.540003	0.490604	0.331312
0.723422	0.772101	0.676594	0.588473		0.870272	0.27942	0.391219	0.454751	0.677952
0.728037	0.66146	0.377356	0.410853		0.925701	0.274815	0.524762	0.582152	0.651865
0.328951	0.262881	0.672741	0.799587		0.453382	0.539426	0.623539	0.441687	0.858554
0.601897	0.672053	0.389917	0.283577		0.277506	0.521501	0.64024	0.587904	0.745391
0.916215	0.416804	0.514963	0.780091		0.510743	0.528395	0.271319	0.632501	0.604904
0.692632	0.620116	0.148048	0.682363		0.425957	0.560132	0.705361	0.322753	0.88109
0.45399	0.465119	0.355569	0.287186		0.472622	0.38716	0.544626	0.254799	0.578309
0.919172	0.592357	0.407661	0.639299		0.786763	0.501049	0.573082	0.448467	0.937879
0.647615	0.596113	0.566589	0.441635		0.543303	0.282509	0.864394	0.564339	0.507264
0.435756	0.424063	0.645182	0.478364		0.64187	0.556761	0.326393	0.60651	0.703167
0.575398	0.701511	0.617115	0.239034		0.603956	0.360204	0.674005	0.39928	0.707351
0.694692	0.855215	0.613227	0.747386		0.541636	0.665128	0.793428	0.5297	0.538291
0.676982	0.69579	0.619199	0.721554		0.369891	0.616656	0.32425	0.376314	0.937276
0.543891	0.490104	0.519494	0.551615		0.864946	0.723619	0.508932	0.558088	0.592492
0.746693	0.496645	0.703253	0.817796		0.394779	0.299878	0.48881	0.343961	0.730303
0.384494	0.686749	0.665802	0.540792		0.703275	0.694078	0.401359	0.605453	0.913852
0.68481	0.909527	0.791022	0.711172		0.630332	0.352787	0.479141	0.541418	0.528377
0.583557	0.519372	0.717217	0.855711		0.659499	0.653519	0.618237	0.481503	0.662244
0.367496	0.682852	0.650486	0.720048		0.445171	0.299052	0.622367	0.478786	0.266229
0.758127	0.354679	0.464278	0.373024		0.642959	0.660283	0.644046	0.645051	0.855319
0.731651	0.517265	0.671162	0.625428		0.295443	0.225233	0.531046	0.351701	0.370505
0.52569	0.625699	0.801	0.358055		0.946752	0.455534	0.541036	0.58375	0.363998
0.500273	0.54568	0.614645	0.685689		0.797092	0.155752	0.383807	0.663184	0.598902
0.577827	0.60603	0.75905	0.778162		0.527827	0.3994	0.367232	0.599707	0.432305
0.760165	0.714061	0.428927	0.698842		0.500123	0.420368	0.655382	0.364749	0.851936
0.561838	0.268321	0.665698	0.571242		0.836152	0.636769	0.658747	0.584158	0.494247
0.71953	0.626854	0.485606	0.870061		0.463642	0.492452	0.33554	0.360637	0.801932
0.366255	0.875905	0.159926	0.557368		0.80945	0.475976	0.866926	0.597279	0.698914
0.687426	0.56937	0.385709	0.306295		0.718411	0.419257	0.260093	0.613916	0.600636
0.872602	0.441713	0.508915	0.316517		0.633184	0.491898	0.786032	0.570629	0.586855
0.694682	0.591043	0.146924	0.802432		0.337017	0.402614	0.341376	0.391011	0.254501
0.543743	0.364366	0.848898	0.883852		0.700049	0.607639	0.487112	0.688675	0.66129
0.670749	0.839371	0.579478	0.543114		0.848215	0.496758	0.640776	0.589528	0.731887
0.632197	0.58777	0.440708	0.611932		0.753888	0.517906	0.233749	0.568396	0.737185
0.441906	0.529423	0.521078	0.695324		0.329023	0.402327	0.699705	0.361148	0.621783
0.49128	0.476835	0.595396	0.268487		0.733065	0.556611	0.799937	0.601487	0.702053
0.340512	0.428527	0.497443	0.489436		0.736549	0.4229	0.658589	0.63073	0.590217
0.806824	0.640468	0.225559	0.5958		0.608572	0.335845	0.467717	0.196377	0.732122
0.618705	0.766572	0.610595	0.92127		0.484881	0.477933	0.492684	0.539336	0.581819
0.778781	0.379106	0.577344	0.603051		0.539684	0.237076	0.689163	0.596471	0.565246
0.353849	0.542939	0.372864	0.566486		0.630236	0.417464	0.88887	0.626585	0.864434
0.440821	0.768909	0.356981	0.515055		0.835308	0.603359	0.680217	0.281743	0.768348
0.795338	0.610032	0.654716	0.770632		0.402695	0.462797	0.696742	0.619544	0.430532
0.873469	0.73961	0.716427	0.682956		0.495451	0.664635	0.592593	0.557507	0.496991
0.453584	0.615037	0.659662	0.563806		0.590765	0.601775	0.556459	0.505304	0.740201
0.789058	0.326036	0.44255	0.612252		0.447244	0.665038	0.875946	0.577605	0.892877
0.636025	0.433718	0.705374	0.754792		0.522831	0.443645	0.821063	0.402922	0.49824
0.718869	0.809804	0.4457	0.533909		0.450407	0.564774	0.410054	0.708129	0.679632
0.920737	0.372385	0.764395	0.76558		0.363288	0.464148	0.369867	0.590024	0.278173
0.759187	0.739963	0.330561	0.669774		0.594238	0.618174	0.652282	0.607242	0.788339
0.889474	0.701803	0.613746	0.629652		0.604049	0.254434	0.78909	0.366019	0.875673
0.488678	0.618549	0.336518	0.794371		0.87249	0.381878	0.693741	0.56553	0.691902
0.873595	0.726394	0.371043	0.736381		0.643024	0.473714	0.74828	0.169069	0.685922
0.903582	0.275002	0.672743	0.650086		0.661752	0.439148	0.384159	0.578056	0.522581
0.540118	0.429857	0.48018	0.669261		0.659492	0.305184	0.61475	0.572592	0.534584
0.707612	0.920771	0.467468	0.777518		0.245724	0.293031	0.64109	0.475204	0.597593
0.448921	0.871103	0.436582	0.869009		0.626313	0.180462	0.79945	0.629729	0.517245
0.534884	0.494569	0.299911	0.680945		0.648589	0.489752	0.649159	0.326492	0.55685
0.746593	0.662925	0.522207	0.391017		0.385181	0.609583	0.645112	0.132524	0.806488
0.607101	0.496108	0.176568	0.620943		0.186479	0.538021	0.814797	0.520802	0.710213
0.672943	0.286046	0.569503	0.706748		0.530026	0.676799	0.574612	0.47385	0.911159
0.473729	0.716634	0.576555	0.418557		0.857471	0.682065	0.533169	0.555158	0.55556
0.811735	0.597585	0.379493	0.651804		0.448849	0.748653	0.680377	0.552934	0.852003
0.574995	0.6556	0.619321	0.530298		0.486286	0.383048	0.325642	0.606063	0.538465
0.540917	0.485604	0.201658	0.702557		0.518849	0.5185	0.765831	0.209202	0.568952
0.567012	0.479982	0.299678	0.618404		0.525993	0.456818	0.431717	0.678283	0.723078
0.705007	0.67785	0.379709	0.68446		0.424496	0.737532	0.297572	0.44468	0.821542
0.765098	0.85063	0.504677	0.248604		0.531808	0.603322	0.722144	0.134038	0.344677
0.275682	0.457244	0.695627	0.591447		0.751187	0.239251	0.714606	0.614333	0.650055
0.389153	0.386074	0.386477	0.662056		0.135405	0.393552	0.513029	0.606803	0.722641
0.7885	0.816348	0.572271	0.379525		0.709956	0.461195	0.503849	0.678645	0.648423
0.369661	0.627109	0.695171	0.682632		0.30555	0.290775	0.380286	0.630268	0.430834
0.826981	0.29917	0.481523	0.800482		0.66714	0.35629	0.390995	0.777327	0.85087
0.631246	0.741412	0.223232	0.665757		0.406081	0.736576	0.637164	0.49567	0.463652
0.628894	0.70526	0.428795	0.675465		0.317087	0.462245	0.232758	0.231475	0.550018
0.558602	0.35055	0.751201	0.652861		0.476103	0.475916	0.379648	0.642434	0.86439
0.673117	0.565124	0.586142	0.683697		0.624984	0.457162	0.759736	0.678729	0.450287
0.734322	0.694904	0.63992	0.730458		0.878602	0.603746	0.80117	0.602356	0.788436
0.555263	0.696188	0.475026	0.722048		0.398735	0.356467	0.63059	0.26336	0.808469
0.628386	0.241724	0.250255	0.861738		0.74099	0.507068	0.650441	0.243794	0.749315
0.683033	0.85248	0.329909	0.691522		0.751239	0.485138	0.558501	0.490815	0.875796
0.869043	0.739238	0.229637	0.380484		0.338628	0.531256	0.715003	0.268082	0.69316
0.443347	0.253701	0.374586	0.68607		0.380106	0.26757	0.719565	0.539489	0.719313
0.275872	0.770034	0.258235	0.834583		0.479219	0.520607	0.595394	0.486865	0.682386
0.782327	0.772576	0.675989	0.461881		0.59487	0.598429	0.395102	0.611789	0.695337
0.696107	0.786119	0.319393	0.676774		0.705162	0.798085	0.695368	0.609081	0.876507
0.641015	0.733375	0.684968	0.717488		0.645425	0.529719	0.384238	0.541078	0.716249
0.960594	0.285494	0.764179	0.682051		0.531063	0.720923	0.588211	0.524365	0.785157
0.905173	0.329808	0.43038	0.72601		0.534774	0.141608	0.679936	0.291996	0.38708
0.833302	0.491069	0.515502	0.71645		0.552159	0.750659	0.622489	0.535137	0.679673
0.776645	0.334174	0.342133	0.645385		0.796255	0.307409	0.815413	0.468048	0.633591
0.646766	0.315347	0.35575	0.50803		0.217529	0.545624	0.336377	0.403502	0.618588
0.357602	0.705595	0.49424	0.663483		0.52522	0.679041	0.580134	0.672685	0.782771
0.760726	0.372006	0.584268	0.75688		0.666806	0.510472	0.698039	0.599335	0.693762
0.810836	0.401756	0.475072	0.625532		0.711485	0.280822	0.288291	0.585553	0.762519
0.899325	0.437679	0.745702	0.851983		0.427335	0.692231	0.525326	0.493891	0.872745
0.711342	0.676972	0.513346	0.648282		0.748971	0.144132	0.612873	0.505028	0.885053
0.792462	0.738867	0.557536	0.279779		0.544266	0.130105	0.337287	0.393922	0.621987
0.718847	0.358731	0.543114	0.603622		0.34065	0.459113	0.678856	0.618855	0.763646
0.403567	0.802087	0.700733	0.792113		0.466425	0.553892	0.393855	0.473109	0.587348
0.764196	0.686881	0.532323	0.734971		0.438352	0.502537	0.647863	0.28391	0.515958
0.479999	0.261013	0.682334	0.711195		0.859886	0.536825	0.204651	0.768417	0.640433
0.272437	0.255512	0.612202	0.817972		0.832096	0.660634	0.547322	0.52748	0.394098
0.592176	0.776938	0.218958	0.621318		0.625621	0.211384	0.357949	0.451395	0.470776
0.267449	0.265025	0.562435	0.486092		0.723817	0.867666	0.569236	0.466242	0.70824
0.863832	0.71257	0.595782	0.634746		0.198021	0.641107	0.6454	0.314431	0.824953
0.492421	0.730635	0.364259	0.417764		0.410191	0.3604	0.782237	0.504359	0.709859
0.537902	0.747519	0.484445	0.610583		0.638453	0.364538	0.557826	0.412402	0.869392
0.632194	0.767309	0.580317	0.52475		0.548094	0.445486	0.559131	0.435894	0.484903
0.502469	0.775881	0.711672	0.615347		0.51104	0.502722	0.704454	0.50744	0.75018
0.709573	0.263721	0.457149	0.743072		0.849408	0.616631	0.633173	0.486778	0.571534
0.590614	0.794184	0.477101	0.67908		0.777151	0.24053	0.738661	0.408715	0.704482
0.57671	0.667903	0.456447	0.684637		0.558474	0.633561	0.793021	0.566888	0.542145
0.790706	0.507551	0.332795	0.665351		0.213859	0.601218	0.544659	0.476905	0.800673
0.59766	0.545002	0.666644	0.239709		0.81837	0.438536	0.945412	0.578742	0.566807
0.422989	0.323029		0.830489		0.80106		0.809232	0.410681	0.803469
0.664677	0.678955		0.392035		0.777748		0.487123	0.283536	0.73724
0.414641	0.390138		0.587454		0.531303		0.796882	0.458131	0.860637
0.2905	0.379199		0.357071		0.617525		0.492731	0.663132	0.697191
0.585638	0.274922		0.572429		0.430558		0.663197	0.749195	0.598228
0.667414	0.395442		0.725166		0.645942		0.810968	0.505612	0.306442
0.645247	0.501609		0.657228		0.272428		0.793562	0.501955	0.757349
0.418031	0.771377		0.805374		0.592013		0.694913	0.466558	0.74288
0.586857	0.333204		0.275103		0.359089		0.855196	0.312631	0.841295
0.72164	0.711835		0.52204		0.248505		0.706162	0.472119	0.727118
0.414818	0.475317		0.764143		0.497842		0.443882	0.700673	0.861179
0.92202	0.344155		0.740489		0.5878		0.548699	0.795379	0.538488
0.705248	0.529469		0.446346		0.425356		0.708654	0.639711	0.758482
0.565742	0.429589		0.611454		0.691253		0.601352	0.459499	0.378363
0.520462	0.749812		0.683262		0.449806		0.567326	0.637881	0.776065
0.835278	0.65654		0.81216		0.752666		0.440372	0.534997	0.683522
0.508867	0.382234		0.54369		0.51768		0.225803	0.587253	0.503561
0.839077	0.704627		0.479678		0.680781		0.570549	0.553119	0.290011
0.716799	0.571344		0.496661		0.717161		0.720191	0.55321	0.499752
0.405539	0.434284		0.35051		0.637117		0.936431	0.445047	0.714681
0.660445	0.644952		0.909776		0.516049		0.376054	0.747621	0.661476
0.603809	0.482684		0.502191		0.446862		0.479013	0.228228	0.612225
0.845033	0.49697		0.50546		0.563876		0.631186	0.507158	0.503584
0.369491	0.604308		0.243545		0.519652		0.245668	0.786613	0.625049
0.808455	0.930634		0.604437		0.580152		0.53798	0.499511	0.414208
0.812422	0.757316		0.735666		0.602013		0.18979	0.377753	0.52079
0.767255	0.679162		0.641008		0.330548		0.812676	0.661414	0.576935
0.729169	0.672324		0.384855		0.438266		0.82716	0.712458	0.221795
0.602794	0.321662		0.920696		0.485217		0.314355	0.44766	0.573057
0.715847	0.669526		0.762976		0.292791		0.496745	0.673378	0.565431
0.86612	0.743313		0.352821		0.756839		0.763514	0.611753	0.826516
0.364154	0.843764		0.405892		0.360939		0.303236	0.483541	0.58026
0.778779	0.530913		0.249586		0.458099		0.217217	0.607179	0.23844
0.518425	0.845363		0.427749		0.438967		0.608354	0.561414	0.639504
0.46549	0.682012		0.644144		0.590534		0.578466	0.329647	0.292598
0.576875	0.891721		0.796741		0.487592		0.705437	0.770242	0.432353
0.631414	0.775143		0.590331		0.584087		0.810011	0.473453	0.372636
0.710378	0.788633		0.499834		0.509191		0.351175	0.39491	0.646696
0.720465	0.41554		0.319528		0.219176		0.69974	0.428256	0.609712
0.826277	0.33447		0.789467		0.289709		0.651671	0.375802	0.741876
0.574705	0.713648		0.562453		0.42017		0.569578	0.320024	0.588166
0.54245	0.479568		0.664822		0.636965		0.684147	0.604888	0.703917
0.643278	0.53362		0.643443		0.423156		0.210323	0.443291	0.539077
0.609074	0.545794		0.711746		0.786876		0.759145	0.304027	0.889427
0.637676	0.405797		0.358322		0.53029		0.83939	0.465484	0.90723
0.573374	0.525641		0.510107		0.498895		0.569299	0.576801	0.653022
0.8908	0.671478		0.877025		0.116938		0.700594	0.681228	0.531843
0.591393	0.668448		0.905866		0.279309		0.492799	0.269406	0.494279
0.862374	0.643817		0.651379		0.25569		0.568408	0.631512	0.550746
0.757598	0.612389		0.779543		0.672825		0.432583	0.739321	0.723661
0.72855	0.850503		0.405906		0.847316		0.381975	0.737665	0.715358
0.45568	0.52813		0.548972		0.177536		0.492544	0.579369	0.38679
0.86859	0.875129		0.785094		0.453125		0.330457	0.528099	0.456293
0.271005	0.524954		0.826961		0.539688		0.214493	0.525392	0.820968
0.470896	0.769876		0.670853		0.584169		0.776509	0.803755	0.68772
0.830813	0.509045		0.466662		0.544327		0.555736	0.644811	0.782017
0.583866	0.673781		0.67771		0.556465		0.902028	0.249667	0.284214
0.214815	0.698844		0.490145		0.613807		0.63361	0.6096	0.299968
0.74385	0.417101		0.715372		0.476305		0.818025	0.711676	0.322468
0.398105	0.478404		0.552039		0.223161		0.46483	0.550859	0.286537
0.925306	0.519351		0.357783		0.455095		0.602815	0.341028	0.336279
0.881914	0.609312		0.445004		0.741797		0.864613	0.682813	0.739107
0.370706	0.907247		0.62203		0.502142		0.378781	0.469583	0.623319
0.789799	0.700694		0.801047		0.531669		0.441141	0.196535	0.688269
0.413811	0.608245		0.892858		0.484654		0.699779	0.565212	0.771105
0.816746	0.528962		0.675922		0.640359		0.675748	0.467443	0.616959
0.586736	0.77443		0.944487		0.181376		0.563882	0.579519	0.63841
0.647121	0.479509		0.840495				0.608889	0.676262	0.798651
0.438009	0.45103		0.386985				0.687661	0.403585	0.436706
0.911632	0.604536		0.55425				0.823003	0.197571	0.919258
0.661036	0.818637		0.815124				0.255259	0.54538	0.477895
0.308728	0.754941		0.757623				0.647698	0.507111	0.500105
0.782824	0.645711		0.709454				0.599451	0.752311	0.618471
0.751946	0.437115		0.380323				0.632258	0.42738	0.523267
0.661985	0.775262		0.848049				0.655614	0.385325	0.307152
0.504736	0.678486		0.874642				0.310866	0.602611	0.676984
0.753235	0.607013		0.513541				0.816788	0.555698	0.456308
0.454594	0.61332		0.577772				0.365628	0.658612	0.890749
0.342711	0.477015		0.812957				0.645032	0.434481	0.625822
0.86221	0.475723		0.541503				0.527908	0.847008	0.59806
0.261281	0.454172		0.349416				0.910115	0.330624	0.622012
0.496375	0.818905		0.826874				0.738051	0.283157	0.663346
0.710128	0.701248		0.489181				0.75165	0.575523	0.772581
0.67776	0.662198		0.609691				0.812743	0.565459	0.559428
0.796763	0.513759		0.585408				0.762006	0.624789	0.757649
0.868475	0.671656		0.305817				0.500534	0.446085	0.801212
0.527469	0.537731		0.718766				0.794238	0.276451	0.388638
0.524727	0.726917		0.360423				0.855143	0.666634	0.633039
0.762272	0.637751		0.65779				0.746329	0.318667	0.565494
0.809023	0.417978		0.800561				0.519127	0.628571	0.802688
0.467951	0.829229		0.866007				0.206731	0.630046	0.340131
0.658209	0.706085		0.808899				0.539696	0.531588	0.691323
0.821494	0.262569		0.381327				0.714494	0.347312	0.67107
0.420244	0.767497		0.888685				0.546118	0.467053	0.249079
0.616023	0.647837		0.451476				0.336642	0.615884	0.471608
0.815268	0.285573		0.654049				0.463618	0.47767	0.397354
0.790703	0.583785		0.829408				0.452965	0.381645	0.741036
0.859592	0.719592		0.343695				0.452446	0.552291	0.726479
0.556115	0.387056		0.614003				0.661264	0.608152	0.37079
0.793395	0.43252		0.794229				0.623271	0.49071	0.753077
0.61644	0.606844		0.388397				0.526945	0.674129	0.466565
0.876963	0.787476		0.601641				0.549817	0.513382	0.666324
0.650322	0.61107		0.684409				0.526849	0.368133	0.403937
0.301086	0.445117		0.607424				0.655097	0.70607	0.441302
0.634698	0.435172		0.733514				0.706055	0.344757	0.414615
0.7761	0.560121		0.736883				0.484512	0.458851	0.862915
0.22538	0.275011		0.811641				0.444811	0.306587	0.38924
0.610498	0.453385		0.86476				0.65661	0.191563	0.591305
0.4605	0.724379		0.403508				0.554035	0.647815	0.30586
0.477346	0.787446		0.469557				0.304456	0.43633	0.845765
0.757641	0.781792		0.755354				0.849006	0.60499	0.419919
0.597319	0.645554		0.884922				0.79904	0.299798	0.565731
0.688089	0.822817		0.48564				0.671115	0.55605	0.272887
0.384918	0.59369		0.819888				0.686499	0.584902	0.375088
0.213329	0.663505		0.710665				0.68921	0.481546	0.7969
0.509742	0.529705		0.80095				0.603613	0.405214	0.842964
0.588031	0.756441		0.464631				0.607498	0.344756	0.492361
0.457906	0.51493		0.700581				0.662268	0.395995	0.791291
0.634867	0.270338		0.235473				0.625928	0.547498	0.858515
0.655029	0.54295		0.647281				0.762841	0.857902	0.720218
0.416131	0.549637		0.540521				0.334716	0.531754	0.402235
0.409419	0.76803		0.532249				0.652896	0.485952	0.790911
0.890005	0.495322		0.862394				0.636738	0.481085	0.596928
0.377664	0.831126		0.512554				0.488065	0.452749	0.515096
0.475654	0.681172		0.76425				0.618692	0.832617	0.850758
0.584107	0.605137		0.251278				0.598481	0.47103	0.812018
0.301286	0.726138		0.740304				0.57926	0.6228	0.75824
0.677425	0.620645		0.737498				0.404993	0.850915	0.627524
0.629157	0.311519		0.725414				0.874115	0.518214	0.756064
0.765815	0.760266		0.502989				0.414273	0.190202	0.778161
0.659465	0.894866		0.780721				0.508085	0.818987	0.839711
0.419254	0.877054		0.770383				0.707791	0.152208	0.50067
0.818744	0.768265		0.351937				0.456137	0.605337	0.620835
0.504231	0.657223		0.777106				0.339062	0.431713	0.619396
0.485028	0.528519		0.812905				0.757032	0.457934	0.602531
0.660975	0.466543		0.724824				0.668433	0.485285	0.906185
0.290486	0.267251		0.74035				0.629144	0.444471	0.622189
0.703763	0.568843		0.6542				0.582303	0.408343	0.731355
0.70779	0.538093		0.778538				0.464666	0.337075	0.769582
0.640529	0.657747		0.747461				0.414826	0.663256	0.314093
0.451088	0.515115		0.233681				0.714472	0.288849	0.567759
0.673689	0.53096		0.640844				0.382983	0.357908	0.707346
0.653549	0.677522		0.645621				0.643725		0.820782
0.54812	0.240026		0.905022				0.880154		0.232464
0.432118	0.911598		0.680175				0.727895		0.849434
0.735347	0.830804		0.687613				0.389476		0.794321
0.726335	0.380366		0.747845				0.632696		0.511531
0.765279	0.514916		0.860116				0.626766		0.300114
0.446578	0.709954		0.5879				0.648487		0.691557
0.458687	0.667349		0.680725				0.538661		0.700804
0.772337	0.380521		0.820661				0.481387		0.6111
0.757424	0.443564		0.698571				0.823283		0.761922
0.831705	0.83417		0.756271				0.574336		0.271652
0.557786	0.592255		0.578661				0.583559		0.535764
0.593167	0.836517		0.730934				0.561562		0.404276
0.643147	0.69536		0.584559				0.443559		0.786924
0.838045	0.853612		0.700794				0.817398		0.879071
0.693062	0.334406		0.261093				0.783649		0.80532
0.644026	0.34286		0.632563				0.303235		0.599362
0.790059	0.362127		0.564248				0.809826		0.697716
0.681688	0.774374		0.338087				0.666554		0.669639
0.756947	0.290637		0.586967				0.652309		0.67758
0.300357	0.826772		0.327436				0.642102		0.335964
0.523761	0.310407		0.607059				0.833382		0.610452
0.613848	0.4771		0.813894				0.687585		0.440612
0.669104	0.37486		0.79833				0.544825		0.413184
0.950054	0.582392		0.549834				0.572921		0.446163
0.839735	0.659707		0.230258				0.597399		0.425933
0.530084	0.644569		0.487499				0.69921		0.389476
0.656728	0.552412		0.712783				0.452802		0.86087
0.518913	0.654794		0.629358				0.620937		0.33419
0.47827	0.892746		0.816908				0.363289		0.475389
0.48458	0.54686		0.837762				0.430603		0.424717
0.859097	0.545095		0.506202				0.545286		0.602125
0.526824	0.680887		0.686998				0.743442		0.820481
0.503071	0.831099		0.527663				0.614861		0.67514
0.513326	0.624591		0.492461				0.533012		0.443357
0.30944	0.270284		0.182903				0.620219		0.332783
0.582552	0.567048		0.45292				0.498608		0.584798
0.535872	0.926132		0.912045				0.245135		0.765963
0.920696	0.849306		0.75765				0.305		0.605644
0.397701	0.676559		0.605713				0.461799		0.757821
0.741662	0.798824		0.483694				0.785001		0.928662
0.315541	0.696699		0.738585				0.40578		0.614305
0.59622	0.521959		0.681972				0.743832		0.572367
0.487682	0.335209		0.506304				0.533366		0.278233
0.556029	0.381738		0.418008				0.341995		0.733992
0.474731	0.775554		0.498164				0.431094		0.526348
0.701954	0.451421		0.746762				0.844129		0.809667
0.610945	0.563285		0.902815				0.464519		0.579036
0.926848	0.457356		0.634575				0.622706		0.516269
0.440025	0.734462		0.699168				0.869166		0.786365
0.630724	0.759554		0.334213				0.525638		0.550054
0.332788	0.53082		0.508927				0.50243		0.581707
0.710488	0.630576		0.442722				0.542274		0.413434
0.686406	0.511563		0.726949				0.578763		0.617678
0.632733	0.402305		0.359228				0.502592		0.526875
0.494882	0.702226		0.479034				0.440098		0.87632
0.540537	0.519968		0.834072				0.822155		0.827496
0.384195	0.887517		0.437226				0.653082		0.768034
0.727135	0.426066		0.753127				0.783423		0.456824
0.789548	0.70274		0.874004				0.81976		0.715565
0.641991	0.655061		0.417164				0.359022		0.450507
0.273965	0.813395		0.235038				0.655619		0.830747
0.519212	0.673492		0.557887				0.60799		0.612852
0.559284	0.797078		0.726069				0.750423		0.244967
0.813199	0.24417		0.695684				0.808802		0.774745
0.354926	0.540534		0.647113				0.548987		0.797927
0.616449	0.528094		0.647345				0.362581		0.756625
0.349728	0.595694		0.490345				0.486338		0.497167
0.613012	0.206307		0.82968				0.431793		0.524895
0.638259	0.535517		0.688748				0.592656		0.748699
0.502043	0.682874		0.772648				0.855687		0.60579
0.756922	0.480687		0.626389				0.552353		0.551238
0.673114	0.677694		0.815726				0.573092		0.650043
0.614819	0.879844		0.537097				0.713139		0.316299
0.627325	0.324162		0.663094				0.568675		0.666178
0.589795	0.658865		0.71875				0.77301		0.698877
0.410991	0.418313		0.567021				0.715352		0.834796
0.372434	0.487053		0.795079				0.804564		0.575915
0.344534	0.33141		0.49954				0.630242		0.58747
0.74187	0.621556		0.69603				0.299951		0.816832
0.771765	0.523136		0.636248				0.470881		0.475655
0.717935	0.364435		0.593037				0.726453		0.641884
0.827104	0.820467		0.666734				0.5989		0.514028
0.468696	0.335972		0.888598				0.755587		0.58976
0.865825	0.790027		0.669768				0.420568		0.683922
0.426442	0.28749		0.282258				0.810306		0.66347
0.899818	0.71233		0.47101				0.545667		0.508769
0.737931	0.779653		0.565935				0.799782		0.761588
0.554309	0.658963		0.502626				0.890237		0.793731
0.755536	0.699936		0.636577				0.77887		0.593993
0.606504	0.473697		0.806145				0.620722		0.894054
0.621923	0.661921		0.830182				0.514493		0.426886
0.469792	0.916934		0.426794				0.513842		0.86345
0.569432	0.728108		0.856836				0.664456		0.775596
0.60434	0.727254		0.76491				0.637815		0.489398
0.839145	0.561622		0.756659				0.582615		0.50612
0.502959	0.274916		0.523147				0.726933		0.659499
0.406167	0.669198		0.565434				0.662456		0.476459
0.700453	0.601572		0.447074				0.61846		0.624707
0.649605	0.436005		0.823805				0.506213		0.669964
0.623774	0.649698		0.393919				0.290835		0.890666
0.787305	0.65839		0.778924				0.827722		0.734871
0.35764	0.456609		0.855962				0.698643		0.547219
0.667439	0.710519		0.423078				0.406331		0.812302
0.924474	0.232595		0.896116				0.503169		0.789428
0.512119	0.395172		0.621163				0.483882		0.686917
0.588955	0.81244		0.717322				0.886631		0.65881
0.394922	0.728657		0.669231				0.39203		0.565484
0.589425	0.806168		0.920843				0.770422		0.607545
0.81255	0.296947		0.936289				0.532897		0.773309
0.480856	0.856438		0.364925				0.593495		0.606493
0.743627	0.525898		0.519026				0.733941		0.819054
0.921743	0.674744		0.702366				0.485477		0.575153
0.656077	0.460086		0.635122				0.548961		0.589687
0.416986	0.271113		0.575819				0.700299		0.863374
0.487947	0.560519		0.637725				0.674352		0.781648
0.551994	0.446805		0.379873				0.37502		0.396953
0.66651	0.704257		0.431793				0.81798		0.557059
0.415794	0.415895		0.262658				0.649787		0.724097
0.868986	0.364727		0.613882				0.724791		0.848078
0.455159	0.453977		0.861391				0.583782		0.583456
0.629594	0.602264		0.477549				0.78569		0.5645
0.519074	0.736465		0.649392				0.798493		0.457698
0.558407	0.218434		0.560215				0.79593		0.571744
0.600023	0.742419		0.710858				0.447421		0.935317
0.822422	0.458444		0.749256				0.943237		0.847382
0.544869	0.748566		0.643785				0.810864		0.605568
0.651422	0.901479		0.788119				0.754827		0.26663
0.411628	0.686227		0.857275				0.721184		0.702258
0.56688	0.253687		0.589556				0.773728		0.729651
0.604673	0.790806		0.570409				0.72594		0.840108
0.661955	0.525082		0.875617				0.762937		0.730418
0.895256	0.672748		0.926312				0.708811		0.471228
0.341067	0.844206		0.868302				0.794915		0.734158
0.364047	0.892488		0.60459				0.879539		0.596366
0.727496	0.428732		0.483935				0.697243		0.644336
0.503771	0.769423		0.731532				0.406555		0.714402
0.830237	0.658788		0.539451				0.76685		0.689542
0.432632	0.758696		0.410659				0.776707		0.495812
0.568802	0.622577		0.79816				0.515353		0.685677
0.524014	0.836856		0.474404				0.653902		0.449047
0.244023	0.87702		0.528385				0.724447		0.767287
0.682559	0.566109		0.518491				0.828617		0.641772
0.748427	0.695388		0.674326				0.714503		0.643878
0.362283	0.571152		0.712561				0.478518		0.350098
0.886393	0.569497		0.733075				0.725648		0.524772
0.525699	0.4287		0.773567				0.518623		0.544878
0.801503	0.630729		0.788001				0.593563		0.484343
0.558063	0.738447		0.513925				0.770812		0.543925
0.555315	0.445033		0.88996				0.539753		0.318729
0.496677	0.58568		0.5535				0.616101		0.716695
0.462188	0.516034		0.320087				0.611715		0.814293
0.779718	0.92845		0.267769				0.463334		0.333421
0.311884	0.367555		0.413246				0.863681		0.840461
0.722053	0.930041		0.721751				0.76852		0.737469
0.633706	0.466249		0.822284				0.422592		0.492244
0.680022	0.604828		0.551485				0.20141		0.736885
0.264462	0.768405		0.627095				0.273815		0.629734
0.526459	0.810342		0.819522				0.675918		0.392009
0.670071	0.506128		0.602767				0.573726		0.659405
0.680479	0.783409		0.664326				0.613579		0.814457
0.612939	0.476264		0.822654				0.476365		0.612742
0.557179	0.57716		0.59385				0.689985		0.929272
0.727566	0.578934		0.74292				0.517654		0.435161
0.769966	0.57465		0.86972				0.379403		0.934296
0.554854	0.193406		0.612137				0.67995		0.531534
0.724714	0.809626		0.535965				0.535496		0.732698
0.739878	0.446454		0.585475				0.430086		0.69102
0.714047	0.624816		0.758185				0.820403		0.505276
0.532212	0.564539		0.565233				0.660723		0.476081
0.742831	0.208286		0.500927				0.828184		0.725789
0.902361	0.827913		0.913003				0.343288		0.400496
0.305568	0.55576		0.368064				0.439095		0.949887
0.681877	0.809752		0.456799				0.434215		0.402705
0.510953	0.266427		0.69426				0.727164		0.535526
0.762461	0.589646		0.52199				0.243067		0.798275
0.550977	0.382431		0.615419				0.874404		0.542466
0.932183	0.88316		0.454801				0.600964		0.454921
0.875063	0.84573		0.44992				0.869873		0.49888
0.83589	0.375821		0.730941				0.619243		0.713321
0.74712	0.236007		0.597683				0.775649		0.599967
0.460121	0.61497		0.713606				0.801999		0.653817
0.516311	0.53088		0.85354				0.601376		0.289911
0.352826	0.373568		0.715452				0.649592		0.359682
0.833294	0.505031		0.431342				0.517558		0.634834
0.651707	0.262996		0.717711				0.816096		0.593066
0.609927	0.446798		0.649461				0.657328		0.230313
0.681047	0.776105		0.703407				0.584882		0.532335
0.862325	0.465553		0.568542				0.355833		0.606233
0.837865	0.571358		0.892019				0.862514		0.733149
0.699037	0.342566		0.658022				0.580034		0.869514
0.674301	0.689532		0.724766				0.528061		0.788488
0.470145	0.692876		0.418269				0.304139		0.252627
0.506435	0.55432		0.67764				0.78618		0.342436
0.557498	0.903127		0.676146				0.802779		0.836176
0.522063	0.603251		0.469941				0.576388		0.479759
0.614783	0.871328		0.413612				0.684791		0.824409
0.737297	0.792146		0.605095				0.311531		0.574847
0.846065	0.357155		0.617197				0.533681		0.527355
0.737368	0.338582		0.844226				0.615868		0.691305
0.783943	0.291136		0.685199				0.798819		0.579699
0.796835	0.489312		0.524233				0.555715		0.619274
0.720379	0.556055		0.673262				0.508632		0.604596
0.70169	0.678892		0.332805				0.804687		0.916479
0.646185			0.665322				0.705638		0.834159
0.353509			0.668985				0.672896		0.425024
0.90805			0.597703				0.575561		0.748129
0.567789			0.555526				0.517619		0.516216
0.614747			0.63446				0.353154		0.686959
0.882591			0.773815				0.56293		0.652621
0.667129			0.677427				0.710231		0.616991
0.589511			0.657541				0.694245		0.854549
0.57207			0.6726				0.560885		0.402865
0.602274			0.449323				0.386465		0.636717
0.895008			0.871554				0.608419		0.569094
0.529007			0.493502				0.725017		0.409465
0.496306			0.370762				0.489468		0.594222
0.662681			0.82432				0.498167		0.802005
0.628516			0.764838				0.739687		0.256589
0.865812			0.483109				0.376682		0.502335
0.710742			0.716772				0.601707		0.702419
0.453243			0.901744				0.564854		0.769437
0.751297			0.523896				0.769843		0.942467
0.680142			0.542505				0.657581		0.692286
0.603051			0.876054				0.504704		0.577628
0.685247			0.455438				0.431909		0.44112
0.633499			0.770371				0.297266		0.698417
0.546152			0.263739				0.762271		0.594584
0.677757			0.837937				0.55427		0.51282
0.487287			0.905948				0.310123		0.7209
0.598109			0.522384				0.538651		0.844418
0.728547			0.487907				0.495034		0.600417
0.268776			0.776026				0.607817		0.37752
0.636486			0.614643				0.301314		0.507873
0.862593			0.583081				0.717793		0.672284
0.479351			0.412578				0.604501		0.82025
0.630375			0.814195				0.711852		0.61909
0.585502			0.825415				0.734501		0.600052
0.944288			0.806995				0.19721		0.377067
0.925925			0.633217				0.697235		0.369791
0.563699			0.618613				0.562415		0.488881
0.808573			0.852093				0.524804		0.467348
0.473706			0.813942				0.760775		0.507094
0.922765			0.61976				0.50266		0.550114
0.76983			0.579764				0.553412		0.431382
0.818356			0.462217				0.875023		0.521963
0.513237			0.747248				0.772924		0.470818
0.656001			0.466981				0.603652		0.644952
0.660555			0.722937				0.696189		0.641943
0.682655			0.582247				0.444456		0.468341
0.689147			0.437574				0.741818		0.54137
0.65517			0.815606				0.678557		0.854878
0.603223			0.444437				0.491002		0.71116
0.789863			0.482324				0.749878		0.250665
0.631488			0.528463				0.480871		0.330807
0.417227			0.661768				0.610692		0.850791
0.739098			0.454267				0.441541		0.744957
0.659217			0.733036				0.459668		0.589252
0.883731			0.576258				0.293353		0.352412
0.828725			0.592529				0.781996		0.533464
0.288772			0.266933				0.687179		0.576798
0.741436			0.276354				0.664306		0.51138
0.574901			0.574032				0.363752		0.877114
0.547502			0.524392				0.708977		0.531489
0.760313			0.93858				0.836204		0.842716
0.611498			0.554777				0.827413		0.703407
0.669832			0.618545				0.606395		0.730631
0.685633			0.810996				0.251658		0.601017
0.341074			0.840041				0.664709		0.648669
0.530958			0.881843				0.818822		0.798361
0.308631			0.446952				0.501096		0.797854
0.431715			0.797943				0.810994		0.777068
0.940546			0.532007				0.826961		0.51111
0.573234			0.660988				0.850143		0.794757
0.733105			0.846318				0.450353		0.574972
0.628448			0.373248				0.792438		0.79769
0.737928			0.680727				0.772409		0.825346
0.686341			0.704029				0.76874		0.888775
0.945523			0.793811				0.475852		0.676883
0.650636			0.444726				0.692303		0.950879
0.547838			0.679284				0.326855		0.916506
0.707213			0.471005				0.64172		0.847087
0.781415			0.796887				0.665645		0.428111
0.846229			0.210334				0.591855		0.600687
0.667362			0.73896				0.930115		0.587545
0.483808			0.528921				0.466208		0.901359
0.618386			0.74768				0.812659		0.816044
0.521255			0.64254				0.640711		0.35426
0.730183			0.539519				0.332335		0.642248
0.803865			0.785423				0.797632		0.870929
0.691496			0.824026				0.507896		0.589768
0.307495			0.832169				0.70228		0.626193
0.64611			0.511931				0.748081		0.734102
0.567056			0.782062				0.832516		0.848771
0.513796			0.527853				0.673301		0.877982
0.447799			0.537257				0.494985		0.472481
0.861333			0.749269				0.852441		0.560717
0.665993			0.503361				0.767188		0.737621
0.872454			0.625879				0.816931		0.462828
0.700042			0.863099				0.777103		0.61592
0.461325			0.871082				0.497824		0.903103
0.561514			0.786202				0.765365		0.846466
0.723298			0.454236				0.672258		0.408166
0.475056			0.294089				0.394924		0.791461
0.773095			0.47627				0.759022		0.510737
0.795789			0.521863				0.589704		0.469529
0.79925			0.641402				0.617144		0.690911
0.673			0.861657				0.583462		0.756501
0.561269			0.327492				0.509629		0.590449
0.841128			0.33293				0.776891		0.767086
0.677809			0.832304				0.447379		0.76077
0.758263			0.771665				0.692913		0.841293
0.528106			0.613833				0.278309		0.67222
0.338214			0.498691				0.592324		0.870972
0.593011			0.39261				0.791567		0.676486
0.508472			0.393998				0.685557		0.659576
0.758086			0.812537				0.261407		0.7032
0.485723			0.505417				0.537879		0.780255
0.674443			0.853002				0.726661		0.700881
0.717888			0.565754				0.754618		0.235075
0.911033							0.353843		0.676615
0.381112							0.729398		0.513523
0.306398							0.795778		0.586967
0.767054							0.368536		0.767399
0.669714							0.624429		0.654323
0.602756							0.683902		0.555411
0.311963							0.800308		0.684786
0.766369							0.512927		0.723237
0.671892							0.544196		0.536547
0.820644							0.57201		0.758149
0.479688							0.753123		0.705513
0.689873							0.373665		0.498148
0.866548							0.436554		0.747028
0.415053							0.746392		0.439649
0.426738							0.784841		0.944543
0.753208							0.597724		0.390556
0.615149							0.548282		0.635867
0.72236							0.539455		0.539249
0.553111							0.727431		0.464123
0.236346							0.317128		0.868364
0.417082							0.612062		0.753165
0.303844							0.721745		0.789549
0.474259							0.866197		0.73968
0.60928							0.433618		0.436633
0.372677							0.681784		0.844425
0.511437							0.486432		0.783984
0.70934							0.310945		0.745378
0.503511							0.669618		0.405067
0.595903							0.444603		0.74661
0.544674							0.676902		0.612741
0.341738							0.55287		0.798091
0.221189							0.504992		0.656599
0.842858							0.505198		0.789435
0.490913							0.474641		0.785984
0.806972							0.629867		0.487235
0.883122							0.290429		0.341331
0.724498							0.698045		0.365868
0.618802							0.527183		0.391794
0.87661							0.500758		0.4127
0.207893							0.592421		0.465766
0.34748							0.699843		0.709179
0.528281							0.281788		0.808893
0.868259							0.635603		0.579644
0.66774							0.569045		0.715314
0.749284							0.560515		0.855825
0.573155							0.648238		0.579163
0.319934							0.640568		0.467983
0.675548							0.835586		0.848286
0.326331							0.766686		0.610091
0.470514							0.620063		0.65318
0.848673							0.478945		0.744657
0.765886							0.689244		0.741691
0.65705							0.821981		0.790583
0.648779							0.466853		0.694434
0.641657							0.902344		0.768717
0.847923							0.60767		0.711668
0.490646							0.558333		0.859311
0.552781							0.798318		0.506574
0.758685							0.716494		0.608485
0.232124							0.393666		0.806117
0.472431							0.27378		0.308191
0.611245							0.730936		0.613806
0.458423							0.845997		0.581204
0.853747							0.490597		0.669702
0.483579							0.427882		0.711647
0.666435							0.567747		0.893286
0.751674							0.682572		0.289557
0.450693							0.824552		0.740924
0.662918							0.778262		0.388744
0.532513							0.557001		0.536909
0.624385							0.594176		0.651047
0.748427							0.651113		0.869635
0.613375							0.602911		0.732852
0.375329							0.436473		0.642552
0.795391							0.509763		0.951987
0.509851							0.437352		0.601886
0.4794							0.642613		0.519838
0.880847							0.65778		0.527849
0.368498							0.603885		0.461288
0.76891							0.621462		0.53232
0.458312							0.764879		0.734237
0.679121							0.78624		0.935751
0.572638							0.503664		0.432894
0.367136							0.463275		0.510369
0.565947							0.65538		0.843344
0.513644							0.727444		0.750741
0.540304							0.485949		0.759123
0.330754							0.518819		0.832232
0.627514							0.779767		0.378707
0.576901							0.553985		0.891396
0.544369							0.464984		0.336156
0.49284							0.491803		0.520271
0.529357							0.595767		0.73466
0.674614							0.70569		0.536279
0.873262							0.241017		0.231067
0.830979							0.487403		0.853897
0.665322							0.910704		0.633329
0.570924							0.818683		0.571112
0.871064							0.680435		0.174285
0.564149							0.692671		0.778772
0.319655							0.624207		0.497442
0.616919							0.672908		0.469817
0.812856							0.394323		0.486961
0.62902							0.579307		0.851361
0.50387							0.671659		0.377003
0.808084							0.679526		0.739682
0.688944							0.496047		0.218415
0.532258							0.66218		0.808094
0.864488							0.526732		0.605919
0.271196							0.737576		0.536341
0.601783							0.632843		0.659121
0.463126							0.695443		0.810617
0.606566							0.51049		0.282053
0.802976							0.605131		0.41852
0.682227							0.332703		0.681982
0.576671							0.548485		0.227352
0.646558							0.259242		0.543877
0.60871							0.73911		0.716202
0.7292							0.572331		0.831095
0.54356							0.602439		0.773878
0.675991							0.858309		0.716827
0.499644							0.623976		0.465867
0.631534							0.420731		0.715538
0.541837							0.881058		0.699516
0.469121							0.242856		0.860439
0.449148							0.537747		0.80673
0.622399							0.523541		0.892771
0.614619							0.305777		0.904303
0.287665							0.885215		0.44503
0.368055							0.562464		0.898696
0.383037							0.517343		0.518583
0.480443							0.459483		0.348136
0.633179							0.644207		0.811633
0.561904							0.512299		0.799059
0.754288							0.630317		0.863788
0.383424							0.49937		0.24219
0.552528							0.603984		0.361431
0.520751							0.553824		0.821924
0.669226							0.485717		0.873687
0.754369							0.709182		0.856957
0.352885							0.697545		0.496177
0.658185							0.528643		0.481148
0.55852							0.516035		0.680026
0.683634							0.477725		0.565403
0.488281							0.664829		0.703445
0.428471							0.778611		0.643356
0.239516							0.706347		0.712694
0.291181							0.79131		0.435358
0.637439							0.660498		0.529991
0.471494							0.34689		0.594587
0.547614							0.517098		0.708745
0.623554							0.785895		0.688689
0.662733							0.703933		0.414548
0.822126							0.606661		0.646566
0.727533							0.624767		0.416243
0.723496							0.770833		0.544531
0.474062							0.673056		0.560499
0.644803							0.886225		0.736621
0.274554							0.550421		0.863419
0.77518							0.748677		0.583358
0.604772							0.752315		0.764149
0.440135							0.626432		0.678128
0.716898							0.419417		0.550421
0.550645							0.583065		0.773962
0.559231							0.799011		0.890506
0.802199							0.652778		0.594954
0.59929							0.352741		0.763361
0.693965							0.511384		0.883123
0.340652							0.56148		0.731971
0.607892							0.89997		0.580623
0.600628							0.644043		0.52551
0.814335							0.893404		0.90041
0.637796							0.435697		0.613657
0.680534							0.3561		0.294296
0.641017							0.674608		0.581945
0.272532							0.694821		0.786134
0.657983							0.225712		0.912514
0.686471							0.812386		0.63422
0.445761							0.730207		0.57467
0.795452							0.583224		0.705577
0.731594							0.319304		0.383126
0.62389							0.383735		0.766476
0.800363							0.672924		0.512808
0.643873							0.86683		0.927821
0.342323							0.590637		0.793006
0.810401							0.77037		0.78817
0.629362							0.634414		0.628479
0.63674							0.727004		0.417628
0.530341							0.423264		0.447037
0.719163							0.885902		0.541441
0.544655							0.593678		0.706392
0.400653							0.280965		0.420123
0.469044							0.547154		0.487051
0.777165							0.683972		0.829
0.531555							0.317284		0.789867
0.280356							0.765945		0.82693
0.386898							0.674237		0.427194
0.303384							0.336952		0.918977
0.668525							0.899046		0.883106
0.38099							0.690234		0.719099
0.672133							0.503063		0.384945
0.832461							0.823404		0.441301
0.886509							0.56803		0.568774
0.644301							0.520655		0.563313
0.502353							0.48195		0.910547
0.873748							0.555924		0.508689
0.632253							0.835196		0.860333
0.881238							0.771257		0.426637
0.637745							0.832139		0.764206
0.418985							0.489022		0.422314
0.542302							0.508771		0.68604
0.641911							0.722194		0.322072
0.623857							0.713673		0.388951
0.374201							0.88598		0.410548
0.719264							0.60668		0.667778
0.235402							0.62645		0.637791
0.390707							0.67468		0.632258
0.520424							0.664726		0.886595
0.637217							0.845355		0.714465
0.667111							0.687895		0.395018
0.529913							0.438666		0.896582
0.393231							0.803807		0.55206
0.533454							0.695039		0.799235
0.227079							0.759729		0.760363
0.826189							0.323462		0.407979
0.458693							0.479405		0.626777
0.214023							0.607898		0.42813
0.664843							0.631698		0.684721
0.644732							0.594454		0.929516
0.682161							0.581014		0.376425
0.391323							0.662268		0.758837
0.338992							0.834013		0.85142
0.542289							0.646146		0.683741
0.562745							0.773749		0.683325
0.315235							0.195084		0.81285
0.645423							0.818882		0.276148
0.367251							0.899931		0.615628
0.710986							0.711725		0.79965
0.405324							0.701062		0.804219
0.414603							0.460417		0.488966
0.822867							0.347366		0.218643
0.506529							0.762322		0.68466
0.51382							0.877062		0.433415
0.819787							0.465854		0.701668
0.589898							0.530594		0.528909
0.397803							0.682117		0.464077
0.778545							0.470827		0.82298
0.768043							0.213788		0.796556
0.326029							0.794457		0.600331
0.824475							0.18126		0.184269
0.360304							0.541124		0.65169
0.805946							0.668913		0.620116
0.751537							0.432466		0.49255
0.780627							0.828876		0.504912
0.554295							0.493196		0.626228
0.592599							0.683723		0.564534
0.593544							0.327037		0.813814
0.623545							0.557141		0.771568
0.564968							0.364781		0.826808
0.536271							0.187046		0.673454
0.598927							0.402726		0.56946
0.441222							0.729173		0.926928
0.271009							0.724691		0.62501
0.493366							0.67802		0.810729
0.506528							0.396731		0.545861
0.44185							0.435978		0.57018
0.399157							0.761454		0.642074
0.95122							0.710265		0.669303
0.537317							0.533925		0.583205
0.198197							0.856296		0.867888
0.590158							0.723256		0.825195
0.719986							0.504015		0.802411
0.451775							0.746734		0.612499
0.509288							0.710409		0.54639
0.789936							0.522416		0.75978
0.623029							0.624792		0.232519
0.878326							0.520211		0.395837
0.630281							0.487741		0.219898
0.831729							0.253256		0.56124
0.694917							0.489889		0.552273
0.890901							0.504066		0.729663
0.803757							0.53901		0.66609
0.404864							0.621118		0.311162
0.302853							0.773489		0.727425
0.472576							0.604717		0.383357
0.859436							0.428913		0.663652
0.429221							0.64726		0.874285
0.742039							0.293222		0.697133
0.769398							0.277536		0.655939
0.692176							0.823254		0.483015
0.311127							0.530654		0.765163
0.707465							0.54907		0.742454
0.594009							0.533723		0.940126
0.782431							0.725532		0.571502
0.744453							0.514129		0.786663
0.684478							0.592621		0.232061
0.63995							0.308628		0.79959
0.912444							0.3952		0.68835
0.4769							0.382647		0.524553
0.47517							0.427306		0.681794
0.515617							0.409509		0.634467
0.557441							0.288607		0.597935
0.823285							0.92981		0.407201
0.653924							0.317985		0.628049
0.552801							0.724153		0.694243
0.639777							0.418563		0.56
0.448408							0.684755		0.491285
0.288252							0.503812		0.44392
0.596285							0.389179		0.728415
0.796737							0.74537		0.752205
0.274422							0.426728		0.68675
0.753726							0.721624		0.841355
0.290339							0.802313		0.768306
0.621028							0.384173		0.791968
0.30205							0.592626		0.595127
0.647999							0.37984		0.503991
0.642656							0.494429		0.721978
0.704379							0.231743		0.674872
0.607888							0.58064		0.717521
0.235382							0.91625		0.765262
0.427493							0.835051		0.748399
0.648091							0.727156		0.810949
0.797866							0.584571		0.386075
0.827269							0.753174
0.715956							0.256605
0.602892							0.769237
0.612601							0.704951
0.64223							0.789906
0.674459							0.407664
0.716139							0.706085
0.422641
0.548227
0.900495
0.860037
0.334959
0.817124
0.742188
0.513711
0.958707
0.662277
0.770433
0.224012
0.498412
0.709631
0.697412
0.608168
0.811246
0.886769
0.835519
0.563388
0.925341
0.457921
0.543136
0.708944
0.789956
0.480918
0.719823
0.741066
0.480897
0.343352
0.637068
0.870079
0.543519
0.629358
0.591233
0.769031
0.821439
0.903466
0.242253
0.557654
0.781983
0.881523
0.522125
0.343184
0.572344
0.787411
0.737938
0.671665
0.579221
0.783562
0.774349
0.593098
0.558949
0.836231
0.291393
0.53953
0.665115
0.49698
0.312553
0.894339
0.781817
0.272909
0.720189
0.59497
0.625779
0.632166
0.87022
0.816955
0.869573
0.622302
0.917796
0.7986
0.62282
0.843293
0.572592
0.65985
0.46001
0.347982
0.72446
0.753611
0.805295
0.72877
0.325692
0.609471
0.631574
0.710223
0.326485
0.463859
0.899187
0.486965
0.743303
0.659937
0.429812
0.550289
0.469393
0.930175
0.917554
0.629851
0.686581
0.207694
0.341108
0.50804
0.260532
0.711337
0.56575
0.287088
0.644934
0.421761
0.811588
0.717299
0.314696
0.583793
0.325137
0.596365
