# Supplementary material for: Pharmacologic activation of integrated stress response kinases inhibits pathologic mitochondrial fragmentation
Source: eLife. 2025 Feb 12;13:RP100541. doi: 10.7554/eLife.100541 (PMC11820110; doi:10.7554/eLife.100541)
Supplement: Figure 3—figure supplement 1—source data 1. [file elife-100541-fig3-figsupp1-data1.xlsx]

## Sheet: Figure 3-figure supplement 1A
Veh	Veh-5min	Veh-10min	Veh-15min
4.36139
5.11362	1.50852		0.608688
4.94933		1.9122	1.42599
	1.34095	1.70571	4.14057
	0.772522	1.4157	2.73697
2.01923	2.1088	1.00144
2.0562	2.76601	2.80711	1.35137
1.43588	1.07461	1.21958	0.61454
4.54958	1.11415	0.616806	0.78051
1.97062	1.62863	3.29215	3.18126
1.58033	1.03705	0.933456	0.811111
3.08116	1.90517	2.03053	1.72472
4.76987	0.605385	2.08978	2.00043
2.78809	1.42371	0.714417	0.734337
2.90653	0.819046	2.68006	0.753143
3.08593	1.19043	4.06026	1.21242
3.58797	3.37631	1.87098	1.40136
1.79101	2.6419	0.811417	2.00088
2.31628	1.51845	4.19733	1.14838
1.53311		3.23834	1.90719
4.45253	1.73141	0.852081	1.34798
1.66658	1.34978	1.10643
1.61336	1.09438		0.715839
4.09563	3.76897	1.23267	0.795105
2.62828	2.95857		2.29376
4.37515	1.16887	0.910889	0.693665
1.76073	0.887039	2.29361	0.883995
5.03904	2.13327	3.2422	0.690491
2.55485		1.73496	0.693626
4.58383	0.745146	2.61557	2.99914
2.22305	0.968121	2.38577	0.74114
1.4672	2.88163	2.55615	0.626907
2.59825	1.73839		2.39675
1.65628	3.52181	0.958336	0.907608
4.17868	2.38766	1.99926	1.11798
2.22166	0.772324	2.57488	1.31774
1.41291	1.01146	2.41868	2.92918
2.28296	1.1397	1.96969	1.3895
2.98413	1.41599	1.03544	1.01345
2.29126	1.97398	1.71707	1.78965
	1.36107	1.61043	2.16499
3.52077	3.95956	2.5379	1.24608
2.65274	1.2735	2.00284	0.920431
6.07383	1.29797	1.48497	1.7163
3.19885	1.51128	1.20657	0.717033
1.91262		1.83255	2.30396
1.8854	2.44465	0.835403	0.841431
3.82957	2.97742		1.54118
1.69613	0.854769	2.07018	1.30885
1.97114	2.44221	0.915234	3.47516
1.49802	3.87946	0.748016	1.06776
	2.84817	1.75509	2.00486
1.66508		2.40598	1.2749
1.93728		0.972824	1.24535
1.51933	3.79544	2.50875	1.46679
3.13736	3.16133	1.12822	2.33365
2.41027	1.47362	0.844922	0.997669
1.22714		2.11672	0.872055
2.86066	2.09886	0.814266	1.3672
1.60035	1.11909		1.17796
1.4516	0.585136	0.908379	1.05102
5.93118	2.6505
2.47595	4.86344	0.715065	2.36627
6.72746	2.6746	2.66282	0.696573
2.37074	1.63098	0.838284	2.3349
5.59549	4.41724	1.05548	2.66082
2.5467	2.22731	3.7203	2.37898
3.06219	2.1683	2.19368	1.69536
2.59642	3.40649	2.95493	1.31591
2.27052	1.44328		1.95435
2.24392	0.864178	2.45804	3.80924
2.00579	0.704651		4.39082
3.16792	0.768085	0.938934	3.23151
2.58041	3.24138	0.852203	0.7752
3.67308	1.92346	0.732706	1.21733
4.41247	0.837616	1.88507	1.95573
3.93887	0.677834	1.06839	1.41044
	1.25259	1.01424	0.916565
2.09565	0.739727	0.710342	0.725687
2.7167	3.21384	0.713167	1.20071
3.68218	4.63097	1.14204	4.16763
1.44165	2.63256	2.95426	3.47961
	0.703979	1.80096	3.45116
4.20459	0.683033	1.13995	1.86161
2.27278	1.12022
2.0322	2.34047	0.590828	2.60764
1.28513	3.2819	1.09953	1.19359
1.71682	1.04143	0.725349	2.46196
1.96724	0.930298	1.22075	1.10335
5.92266	1.29332	2.81923
2.34806	1.67527	1.82607	2.00603
	0.758453	1.41145	1.12793
1.97999	1.47049	2.34504
2.20789		1.76591	1.70078
2.02512	1.09555	3.92009	1.73272
3.3393	1.44221		3.68247
3.03691	1.57537	1.87378	1.04736
2.11122	0.820038	1.19382
2.68858	2.55127	1.50813	1.51081
3.0657	1.61691	0.906319	0.843269
3.67817	1.02858	0.800468
1.7403	0.843971	2.40642
		0.724026	0.973198
3.65626	1.01431	0.88446
2.13479	1.6575	2.41292	2.2281
2.78096	2.22541	1.58633	0.920845
4.31865	0.968353	1.27612	2.04288
1.87159	0.682343	1.76051	1.24146
1.95838	1.60919		1.45322
3.89734	0.863853		2.5381
1.82661	1.31405	3.19373	1.98407
6.12616	2.43557	1.79381	2.33874
3.75548	2.88234	0.984411	1.38403
1.48278	1.82784		1.98704
1.25791	1.51346	2.27069
2.31488	2.12098	1.15281	2.76431
6.49168	1.5077		4.35336
1.8241	4.50335	0.843796	1.35644
5.31517	4.85332	1.16623
1.34991	2.7134		0.788712
4.57588	0.895737	2.57753
5.20117	4.3582		2.68829
3.55837	1.00999	0.859848	0.850021
2.04662	1.02367	0.838737	0.892784
2.58212	0.801521		3.29201
1.76872	3.19576		3.47886
		2.45633	0.836838
4.58137		2.67082	0.930618
2.15076	0.902786	0.638149	1.2696
1.25409	1.76034	3.36763
1.46893	1.43875	0.773717	1.70394
2.22054	3.15862		2.51856
5.09514	1.49059	1.22678	1.42422
7.20022	1.17276	1.056
2.78862	1.08282		1.23486
2.0444	2.18337	0.776905	2.07055
1.84863	1.05692	1.74456	1.02102
	3.45033	0.703407	1.39653
2.15356	1.27114	0.764999	1.22511
6.34346	2.72437	2.92655	4.06101
6.65527	3.44923	3.50494
2.4851	2.68716	1.30914	3.25291
	3.95351	3.60192	2.42275
3.38734	0.777073		1.4816
2.73754	2.1884	1.84242	1.26377
1.65804	5.06285	1.8675	0.931402
2.67557	1.63651	2.38169	0.712158
	3.68236	0.658417	1.83486
2.18864	1.32679	1.76499
5.29332		1.1958	0.988222
4.25684			0.735116
2.7352	1.90603	2.60251	2.87296
5.99614	2.08726		1.80513
		1.61188	0.691442
1.39671	0.92881	0.921799	0.863967
		1.49033	0.84202
1.38355	2.77387
1.70188	0.977097	1.16634	1.94346
2.3336	1.06117	0.986351	1.16227
4.79362	1.19411		1.19389
2.49209	1.12379	2.55263	0.731813
6.00872	4.18498	1.99541	0.917307
	0.748774	3.45464
4.65297		2.23982	0.773145
2.27969	1.92979	3.15203	0.707285
	4.72863	2.00329	0.720764
2.11261	1.99429	3.01319	1.86189
1.4357	0.62254	1.33739	1.61164
3.52315	0.841288		0.961777
6.90725	1.65416	0.847415	1.09522
2.38094	4.94408	0.623619	1.11612
1.73374	1.77909	1.30483	2.55816
	1.19622	1.33326
3.98096		1.18536
5.82655	1.20705	1.35043	1.33549
5.95271	2.6631	1.94633	1.35742
5.77338	0.865692
2.89278	1.12553		2.2492
5.97705	1.97096		0.595825
2.92591	0.796478	1.82526	1.72912
1.20321	1.19913	0.931351	0.733616
2.18523	2.82441	1.09727	2.24191
3.74645	1.19133	3.52456	2.56933
2.18361		1.69518	2.50042
3.56204	3.54766	1.575	4.00419
1.89562	0.858841	1.20302	1.66072
1.27925		1.41697	3.2438
2.59098		1.44246	0.961601
2.1335		1.04794	1.4431
2.70192	4.68781	0.890086	1.65337
4.78968		1.00401
1.38612	1.18047	0.71302	1.18015
2.75141	0.628208	3.78473	0.6173
3.35126	1.52353	0.635376	3.30431
3.6544		1.0069	1.62088
1.21	3.8283	0.966764	1.00983
4.90983	0.750877		3.20039
3.06123	1.96898		0.852554
1.32101	0.954445	2.35557	1.94745
1.87395	0.978695		1.07568
	0.542582	0.76873	2.76678
2.11548	1.78951	1.46409	3.10883
1.89181	0.801704	0.686035	2.59158
2.91479	2.73289	2.76868	1.02385
2.27032	1.28413	1.80099	1.22489
4.54996	0.58749	3.28629	2.67899
			1.0807
3.39343	4.56326	0.60524	2.72683
1.77098	0.853241		1.38654
2.67273	1.32008	0.654198	1.52484
5.51756	2.80493	0.895967
2.85089	3.79788	0.764999	1.65413
3.78421	4.87595	0.957146	1.16317
1.84029	3.71687	0.840206	1.909
3.0634	2.4616	1.45973	1.17048
3.7123	1.3111	1.71091
2.14679	2.54031	2.90852	2.25256
5.19176	2.43212	2.36212	1.49474
	2.51434	1.34489	0.917755
7.14151	3.8073
2.5647	1.1135	1.39304	2.36239
2.20393	0.725471	1.65229	0.952625
1.72024	2.55117	0.735801	1.81158
3.81017	1.23116	2.51781	0.685608
3.2074	4.02691	1.41875	1.60033
2.96806	3.71892	0.896088	0.701504
4.15961	1.29033	1.66254
2.7019	0.6213	1.21848	1.17797
2.88094	1.01566	0.838978	1.09208
3.07298	3.31895	1.0561	2.50329
2.90354	0.682745	3.17915	2.72442
4.54489	1.29842	0.80087	2.43699
3.40632	0.752769	0.572456	1.27618
2.77664	1.44784	1.31467	0.665289
2.77242	0.663441	0.601892	2.91064
2.39447	0.984474	1.5429	2.96305
2.26059	1.92102	0.739506	0.707298
1.52523	1.38224	0.903221	2.30669
3.13511	0.754959	1.19732	3.78095
2.33039	2.66122	0.813095	0.63707
4.8094	2.03699	0.697704	0.876633
4.00933		0.808083	0.813919
3.63269	1.39427	0.725273	0.574516
7.16539	1.63832	1.46273	1.10183
2.35636	0.87664	2.28749	2.43649
3.27209	3.04365	0.761673	1.70271
1.93743	2.55745	0.854443	0.8423
6.44865	1.21237	0.690582	1.56269
1.28695	0.768379	1.02884
4.93179	2.90565
2.02605	4.08708	0.633371	1.75364
5.60427	2.22124	1.48181	2.15373
1.90602	3.94028	0.641605	1.17619
3.10442	0.805389	4.11298	1.55511
1.92955	4.56331	1.22277	0.916908
2.24237	1.28769	0.72316	0.595211
5.86921	2.25241		1.08563
6.6549	0.94783		1.689
	1.29053	1.57399
2.55103		1.08078	1.62428
1.66109		1.07253	2.59998
2.2618		1.07066	1.17556
7.07047	4.45851	0.788593	0.716217
4.28423			1.93707
3.31138		0.634645	1.48026
1.80126	1.12109	1.45833	0.672485
2.7669	1.52875	3.10676	1.1667
6.16634	1.68369	0.858849	1.0879
3.78191	1.11917	0.97628	0.849873
2.44276	1.8576	1.30514
3.99371	0.686489	1.11078	1.14835
6.05604	1.22738	1.91894	2.65059
	1.22926	0.746521	2.30637
	0.696064	3.4453	2.6256
	2.79453	0.7275	1.56989
	4.95628	1.65257	1.34344
5.24296	4.58955	0.923416	1.16555
1.71979	2.02356	3.1857	2.07563
2.17096	4.19844	1.11536	1.07603
	1.77713	2.00348
		1.09711	0.726036
5.42445	2.38746	2.54862	1.03488
1.179	2.41083	1.05227	3.48215
2.82429		0.710922	0.618462
2.62	1.41611		3.87415
3.86131	2.80554	1.39158	2.88602
3.3325	3.60638	1.01421	1.9896
2.00016	1.94997	0.720178
1.53568	0.814644	1.32984	3.70736
2.43243		1.82598	2.94842
3.23022	0.65485	1.06546
3.70371	1.81964	1.94016	2.24379
3.79483	2.20975	0.764984	0.979195
1.8665	1.28761	1.50466	0.787398
5.18995	2.37251		1.33127
3.45079	2.89426	0.718536	4.08431
	1.44508
2.58705	1.12227	1.61635	1.19227
1.94102	2.81561	1.01118	1.06956
5.94706	1.6672	1.53242	2.35408
2.25188			0.973885
5.10142	1.78313	0.820213	2.01393
	1.65248	1.66765
	1.24142	0.575592
3.90504	1.1949		1.13869
2.02842		1.55174	1.20207
2.23976	1.96822	0.85051
1.33021	0.995472	0.81531
1.28918	1.46954	2.02506	1.48875
5.96532	1.09534	0.652954	0.866302
2.29645	3.95629		0.685898
4.6775	2.86005	1.01671	0.976948
1.9857		2.18416	0.622856
1.38334	1.11824	0.667324	1.56365
2.52625	2.03778	0.775574	1.34863
1.86742	1.44775	0.763542	1.95174
4.98049	1.16171	1.95575	1.61
4.5359	1.48949	1.01532	2.58222
	1.92473	1.91517	2.5747
		1.22626	2.40082
6.30909	1.02251	1.22148
	2.14077		3.716
3.0676	1.12436	1.74151
2.78803	2.42285	2.93378	0.76606
	2.72301		0.90501
2.70578	1.63754	2.00935	0.631142
2.26746	1.41875	0.702332	0.917965
2.60083	2.08232	0.86768	0.746284
	1.23164	2.14525	3.40786
2.69859	3.75626	1.36221	2.08118
1.86913	2.35034	1.09291	1.44677
3.68791	1.33368	0.823706	1.90288
1.32368	1.13652	0.946291	3.39615
1.49266	2.41368	1.56307
2.6166	1.12229	1.31403
4.55611	0.692402	2.0089	2.18985
1.99983	4.29379		2.10014
3.11353	0.74704	2.90377	1.18333
4.87262	1.15792	3.49143	1.73125
3.62856	1.27027	1.91401	0.705757
6.25441	3.48625	1.6131	0.856207
5.26257	3.94028	0.99017	1.58519
4.88036	0.722992	1.0032	1.05101
			2.63105
4.62523	3.4882	0.661667	2.29562
2.10789	0.725908
1.19401	5.01367	1.67301	1.39769
2.31935	1.67691		0.630066
2.72445	0.757843	1.26906	2.09549
1.35404	0.634621		2.22454
3.44283	1.53328		0.734016
2.34963	2.65806
2.6254	1.34068		2.89331
5.11093	1.42849		1.29688
3.31091
2.42483	2.21487
1.33463	3.81052		0.844078
2.68415	3.42757		3.12547
	0.815166		2.54453
3.03732	1.53844		1.68421
2.3862	1.03723		0.696671
6.10925			1.40064
2.53532	0.767052		2.54036
	0.599192		0.819187
2.96819	2.59166		0.919292
1.97353	2.02243		1.46501
4.65002	1.82277		1.16893
2.13507	1.62956		1.38225
3.76424	0.938572		0.651405
1.85372	2.32332		1.04684
5.18806
5.21426	1.10196		4.37548
7.21731	0.707024		1.77579
1.72277	1.51712		3.05003
2.05484	0.831121		1.57158
2.05236	0.927057		2.34787
5.03024			2.45223
3.89586	0.837593
1.6813			0.957581
6.56746	1.63379		2.21492
2.65552	1.8022		1.34022
3.87669	4.78325		0.657173
1.95013			0.945396
2.55088	2.10378		1.24293
3.23263	3.92422		2.15141
1.86649	1.49896		2.21698
2.90648	2.45469		2.46684
	4.07028		4.09728
2.59147	1.10256		1.17849
4.68358	1.29108		2.81387
2.72598			3.79757
5.20364	1.63442		0.727877
3.10567	2.12795
4.42796			2.2889
3.11124	2.90875		0.693611
1.20426	3.93727		1.47151
3.27135	1.89346		1.60344
3.51072	0.807082		1.70932
1.57433	1.53368		1.60645
2.13531	0.91362		1.8698
	0.94606		0.843445
5.71753	1.27042
2.15005	2.00045		0.679989
2.68257	1.45429		0.557972
2.05427			4.04902
2.08066	1.53995		1.45502
2.72338	2.16864		0.919369
1.88334	1.95476
3.44046	1.30731		0.686942
1.95804	0.81489		1.179
2.60675	1.6444		0.657387
	1.16864		4.23275
1.92901	0.860691		0.619781
2.82504			0.990589
	2.57011		1.59108
7.16602	4.95464		1.38282
	4.78661
6.19397	0.964424
6.88921	1.40533		0.572647
4.52122	1.28464		1.10182
7.12321			1.09588
	0.61454
3.42963	3.02152
2.17624	1.42954
2.83058	2.71546
1.77654	3.74371
1.41475	3.75912
2.67932
3.66862	0.964813
2.83907	0.824928
2.07518	1.9227
2.27271	2.41795
2.10835
2.34015	0.656548
2.10044	2.28999
2.87932	0.816872
1.63021	1.55468
2.36613	1.59699
3.03654	0.837448
1.61893	1.35675
1.45724	0.836565
3.72267	2.93571
3.30813	1.51667
2.18781	2.24999
5.97856	1.57707
1.47218	1.38894
2.9077	3.99135
2.15967	1.50693
1.62061
1.71002	1.27702
2.21121
2.53769	2.04317
7.05925	1.86588
2.47668	0.809784
2.62928	2.59894
1.61511	1.53126
1.36882	1.27897
4.22759	4.46799
4.87396	0.575447
2.93111	2.78398
2.10821	1.00527
5.03322	4.39452
2.68053	3.15651
6.14778
1.84537	1.40768
5.08703	2.85239
2.53709	1.67793
3.01025	1.04046
4.77371	2.47233
2.70101	0.938576
2.47615	3.23614
2.3968	2.38268
3.5381	3.96479
3.35091	2.09266
5.68348	1.25784
2.09461	1.38422
1.60316
1.83266	1.46416
4.42995	1.65439
2.66874	1.3779
2.13451	0.714706
1.42575	0.948082
2.65972	3.19578
3.3467	1.20283
3.08681
1.69794	0.783278
2.38383	1.71494
1.76584	3.55627
2.97242	0.967258
3.04405
1.64153	2.24394
1.97735
4.07583	0.944347
4.5975	2.33252
	2.09355
5.08453	0.677755
2.19354	1.88873
3.3294	0.711103
2.87545	1.3025
2.38631	1.25576
1.97128	1.40779
2.96849
	2.63617
1.41491	1.39067
3.00336	0.732876
2.5446	1.96894
2.93495	2.12376
1.80161
1.84024	1.88577
1.56269	2.04161
1.44467	1.31525
	1.67802
3.62128	2.0685
1.97231	2.06346
2.8419	3.58795
4.61004	1.1252
1.44807	0.799244
4.56854	0.770271
2.45617	1.9789
2.20176	1.48755
2.4124	1.06663
3.04092	3.81704
3.21985	2.58119
1.21147	2.49686
2.98711	0.956936
4.39495	1.65597
2.34098
3.227	2.61495
2.6874	0.966717
4.08272	4.31631
3.40225	0.897535
2.33763	1.80673
2.18041	1.47273
2.18254
3.53373
1.94195	2.75766
	0.725072
4.02627	1.93452
3.41942	3.84999
2.23421	0.525328
2.36663	2.34966
1.61516
1.86232	4.65105
2.50234	1.6357
1.92871	2.45778
2.06495	1.77788
5.26853	0.714703
2.54733	2.09575
2.39763	2.33164
1.99293	2.07014
4.84611	0.772774
1.73397	1.2374
2.91367	2.36958
1.60316	0.996021
4.09741	0.725641
2.24283	0.659367
	2.06844
4.39044	1.75338
2.12389	3.65902
2.09671	0.94968
1.87496	4.39497
2.00165	1.58126
5.40883	1.26766
5.33522
1.56178
2.2005
2.78101
4.51328
2.03895
1.7704
1.76852
3.17636
1.85165
2.05287
5.73561
4.06109
3.00464
5.43615
1.42814
3.93819
1.59523
4.85786
4.55168
5.54266
2.11338
1.94654
2.11622
2.44875
3.55942
2.70641
1.57751
1.53801
2.03445
1.50043
3.50751
3.12373
3.22066
6.16229
1.32354
4.92203
2.333
3.28518
3.72559
4.01408
3.63504
2.24444
1.8424
5.74797
1.48357
2.07038
1.80658
2.00057
1.73613
6.63022
2.83326
3.69763
1.27398
1.41544
2.73695
3.9413
4.40089
3.39072
1.81308
2.04463
1.62017
5.93991
1.80275
5.7281
6.56045
1.15061
3.66154
5.53329
2.88568
3.01665
5.48396
2.22108
1.79641
1.5464
2.04037
1.24654
3.88688
1.62894
2.41725
2.746
1.28424
2.69579
3.86983
1.94323
2.10123
1.77566
2.83904
2.01731
3.25116
5.1958
2.37084
3.9889
1.90707
2.34661
3.32906
6.92568
2.57642
2.79613
1.902
3.64825
1.80261
3.36765
1.488
2.31377
1.50613
3.9831
3.07574
1.43969
6.82669
1.42171
2.53372
5.72909
5.05634
2.48627
7.23271
5.35263
1.69045
1.49257
3.18921
3.08963
3.50884
1.51662
2.30497
4.0215
1.83911
2.39625
7.14815
2.73214
4.5089
2.63141
3.7095
2.49945
1.92516
1.39463
2.44639
4.23882
2.96607
5.26236
2.77622
3.44213
1.80054
1.9542
2.95284
1.53848
3.51164
6.06227
1.33195
3.49136
2.57805
3.90375
2.59402
2.90498
2.07208
2.62331
2.36087
3.1032
3.7211
2.39806
2.99383
1.22359
4.7711
2.97418
3.17663
1.69716
3.23283
4.13787
1.57214
1.83262
1.64476
3.54679
1.54859
4.23053
1.91868
6.80308
1.37967
2.10293
2.15945
3.78416
3.99822
6.17013
1.81338
5.52235
2.34691
2.63483
4.01869
1.42268
2.00816
3.53139
1.95018
1.28795
4.1163
1.99234
6.76091
2.42945
2.56086
2.68933
2.44597
3.97533
3.85723
1.59378
6.60978
1.66373
3.35602
2.05585
2.82634
1.43122
2.60365
2.99609
4.32413
2.48088
4.81961
4.73104
2.91646
5.90641
3.62463
1.7905
4.40379
3.57068
4.50207
1.48231
5.21719
3.40641
1.72573
2.84904
3.59424
2.78098
3.72149
2.01879
1.84245
1.48719
5.69209
2.53592
2.0599
5.32224
1.68447
2.16734
3.43151
1.91538
1.30843
2.62598
3.12521
3.50156
2.44673
2.17168
1.36807
2.9423
2.21771
4.7501
3.93841
2.26618
6.5954
1.9845
3.38241
2.8506
1.44593
3.06516
3.63036
1.85454
1.82867
4.25459
2.70188
6.06314
3.89708
2.23677
7.24141
1.86015
6.21589
2.75767
1.39924
4.598
2.54389
5.03012
2.18647
3.29496
1.49573
6.35397
6.46188
2.41813
1.91448
4.47511
1.94054
4.16492
4.82325
6.2644
3.12433
6.6331
1.63266
3.21212
2.16006
1.4689
2.14758
7.03648
4.93674
4.81925
3.08618
2.42857
2.35823
4.96588
2.69775
3.92039
1.86009
1.95514
4.17187
2.10027
1.32023
2.76732
3.73449
1.90427
2.0743
6.47903
1.7526
4.8393
3.86264
4.95313
1.34843
6.8586
2.88055
1.20033
2.28427
2.21345
1.66091
1.89574
5.80779
2.58834
2.33784
2.63548
4.96588
3.88211
2.41475
3.01442
4.42741
1.69758
3.41816
1.43957
1.86037
6.59826
2.06003
1.60393
2.31071
1.9263
4.71978
2.28748
1.82901
4.6556
4.86491
3.12848
6.25468
2.00693
1.75986
2.38708
3.57617
5.67618
1.43116
1.55405
3.99719
1.91234
1.59045
2.96899

## Sheet: Figure 3-figure supplement 1B
Veh	Veh-5min	Veh-10min	Veh-15min
2.35764
2.98437	0.783433	3.2598	0.334731
2.65839	3.30772	1.09414	0.779545
7.73385	0.791866	1.29432	2.43376
4.11183	0.516365	0.753611	1.2263
0.963941	1.17331	0.625086	5.31992
1.34443	1.46264	1.7024	0.724608
0.799507	0.728818	0.756613	0.352086
2.79329	0.606281	0.363894	0.486409
1.1352	1.05878	1.58105	1.81885
0.795716	0.595405	0.524855	0.507261
1.7757	0.970907	0.919768	0.948907
2.63234	0.342168	1.06267	1.14647
1.55524	0.755278	0.39864	0.4197
1.38479	0.467292	1.52209	0.414317
1.72864	0.696976	2.65643	0.61947
2.1063	1.84048	1.0183	0.783457
1.05583	1.42665	0.489887	1.22924
1.35446	0.866909	2.57616	0.587042
0.834245	3.53912	1.77891	1.11562
2.7383	1.02224	0.472854	0.747517
0.914564	0.762303	0.703026	4.11883
0.861663	0.682268	3.76463	0.474319
2.08428	2.11034	0.722697	0.457667
1.33199	1.50606	3.06663	1.1845
2.9405	0.676551	0.53689	0.481579
0.886308	0.492744	1.0683	0.508065
2.80396	1.08086	1.80592	0.416612
1.25206	3.26935	0.886261	0.448519
2.60519	0.445236	1.55571	1.62759
1.02304	0.548534	1.10003	0.467552
0.786474	1.53847	1.52235	0.35174
1.67436	1.0733	6.06183	1.24588
0.894638	1.82056	0.573966	0.476983
2.60029	1.31136	1.31468	0.577036
1.34795	0.43831	1.33949	0.71959
0.728436	0.574589	1.67193	1.63478
1.19644	0.699233	1.27313	0.739508
1.69483	0.69063	0.51418	0.634529
1.28217	1.22755	0.961995	1.10996
5.39914	0.726498	0.830716	1.25253
2.38177	2.16124	1.32302	0.75885
1.29053	0.635564	1.27614	0.487521
3.11141	0.762347	0.794939	0.871875
1.43138	0.964755	0.689758	0.421926
1.16572	3.24147	0.957364	1.22152
1.14629	1.46118	0.460618	0.464964
2.42502	1.93438	3.47849	0.717354
0.945589	0.467307	1.33361	0.7427
1.06695	1.19947	0.506832	2.20461
0.911665	2.00111	0.449814	0.5547
4.77999	1.88051	1.35468	1.3075
0.9413	2.74897	1.39043	0.694395
1.06783	4.21513	0.557722	0.725083
0.934751	2.60867	1.44644	0.872953
1.69316	1.59809	0.640945	1.3765
1.17363	0.826493	0.475163	0.525227
0.750416	3.99153	1.19322	0.46601
1.6175	1.13859	0.506334	0.760471
0.901367	0.613648	4.06542	0.744245
0.771269	0.33068	0.486817	0.612197
6.58994	5.20907	6.05351	7.05502
3.06409	1.60739	2.42455	2.78971
1.36058	2.2584	0.40906	1.18405
4.55012	1.31708	1.30866	0.385464
1.24889	0.856184	0.473739	1.45698
4.07673	2.38604	0.541439	1.42604
1.37091	1.07424	1.77108	1.35336
1.66858	1.3931	1.25612	1.06832
1.47184	1.99525	1.48601	0.685732
1.2733	0.84682	3.0716	1.13308
1.21898	0.499625	1.3031	2.44806
1.17014	0.389924	6.01512	2.71565
1.97005	0.431357	0.491726	1.87206
1.55887	1.77469	0.484261	0.424275
2.01961	1.08562	0.407279	0.627918
2.62623	0.457835	1.24943	1.13619
1.78224	0.391006	0.715958	0.795712
6.16746	0.631345	0.498606	0.50333
1.24458	0.41856	0.403854	0.408599
1.45774	1.63351	0.394667	0.610809
1.96482	3.06228	0.672741	2.12778
0.840867	1.40873	1.75337	1.98994
4.97961	0.416153	0.896155	1.69492
2.54403	0.384734	0.640014	0.95057
1.20384	0.644027	2.62051	4.08999
1.03877	1.51863	0.327763	1.41601
0.721447	1.67432	0.671781	0.614448
0.870766	0.650214	0.399526	1.24136
1.02005	0.509516	0.738664	0.676245
3.52491	0.797204	1.44899	4.96116
1.26299	1.15314	1.07636	1.06969
4.28181	0.42038	0.796164	0.705707
0.920675	0.78867	1.34743	5.89009
1.26235	4.22144	1.01404	0.862875
1.18505	0.645737	1.98718	1.01297
1.99458	0.865462	3.24873	1.43434
1.75585	0.77817	1.05642	0.657414
1.23406	0.473078	0.700756	6.14231
1.33939	1.35877	0.887046	0.810895
1.83413	0.953151	0.54217	0.517867
2.09232	0.685411	0.463352	3.81251
1.01883	0.494758	1.46171	3.25385
8.99644	4.68119	0.406247	0.610838
1.73799	0.624948	0.461825	5.95592
1.03638	0.935592	1.37026	1.15105
1.6292	1.16781	0.894758	0.48875
2.44771	0.558079	0.653318	1.04278
1.06839	0.379542	1.18888	0.625385
1.07923	0.833739	4.88868	0.741917
2.20487	0.511734	5.74517	1.5689
0.925906	0.797467	1.91176	1.12899
2.71773	1.23263	0.945215	1.22568
2.38548	1.61331	0.676026	0.746554
0.815094	1.04092	4.9027	1.18482
0.736709	0.849433	1.30405	3.68601
1.42781	1.30909	0.722512	1.62696
3.64559	0.86502	3.8188	2.59788
1.03625	2.54878	0.463776	0.763604
3.11238	2.70977	0.7329	6.8298
0.852362	1.67197	2.08985	0.456373
3.14005	0.48716	1.42045	4.93888
3.05298	2.54934	4.83816	1.46421
2.32871	0.57132	0.503104	0.467163
1.21721	0.555551	0.47943	0.51508
1.50207	0.508684	2.80588	1.83508
0.901925	2.02232	7.92208	2.03866
3.61006	3.12283	1.43725	0.510243
2.33488	5.13725	1.64127	0.508916
1.23062	0.49025	0.35595	0.700579
0.732321	1.08658	1.99384	4.16025
0.75909	0.70395	0.453431	0.921281
1.36752	1.88123	2.94491	1.39361
2.91063	0.809723	0.745695	0.753846
3.98014	0.661654	0.643584	2.59914
1.6528	0.664251	6.04366	0.735051
1.22335	1.21421	0.488926	1.01795
1.03337	0.541564	0.922309	0.497342
4.30951	2.13808	0.391032	0.732005
1.03149	0.809346	0.451309	0.654719
3.63224	1.78142	1.75955	2.44076
3.79133	1.9493	1.80735	6.14366
1.48375	1.5399	0.837709	2.0205
9.24328	2.09199	2.06444	1.40584
1.64163	0.455048	4.13422	0.805353
1.50325	1.33911	0.976054	0.728433
0.86489	2.72172	0.966509	0.52626
1.50989	0.891071	1.50838	0.421987
4.06809	2.11805	0.378566	1.04071
1.26952	0.821978	0.853107	2.62981
2.82132	3.73985	0.668591	0.568304
2.30926	3.17866	2.87238	0.472315
1.53751	1.07674	1.42812	1.84131
4.09494	1.08873	4.4876	0.934154
5.54765	2.73054	0.970677	0.39383
0.740595	0.510431	0.494535	0.55058
4.70099	5.81023	0.827013	0.540863
0.761671	1.71977	7.19485	6.54372
0.859994	0.560905	0.591414	1.15091
1.46043	0.54869	0.544712	0.653068
2.43454	0.724623	4.15996	0.644177
1.53899	0.700439	1.55057	0.468966
4.08234	2.11566	1.10393	0.521123
4.13155	0.408397	2.05314	2.94808
2.99932	4.10992	1.23001	0.421646
1.38552	1.09746	1.50748	0.380847
4.99878	2.52509	1.24782	0.398654
0.998699	1.05783	1.91668	1.13464
0.834144	0.346737	0.74037	0.851063
2.1752	0.480072	2.78601	0.50806
4.17443	0.867414	0.43396	0.66552
1.26954	2.83628	0.354997	0.556232
1.01237	0.992169	0.691308	1.32508
5.60063	0.670193	0.742692	7.13537
2.68422	4.90124	0.715645	4.33277
3.71676	0.71679	0.690931	0.758038
3.47913	1.33774	0.965205	0.769119
3.20991	0.499433	4.11041
1.63795	0.667416	3.57603	1.29746
3.30536	1.11369		0.342217
1.90184	0.451873	1.08457	1.05783
0.748296	0.716224	0.562046	0.47761
1.21384	1.54676	0.569465	1.43298
1.97421	0.691699	1.86862	1.39607
1.08687	2.97191	1.0252	1.50997
2.00003	2.1213	0.802264	2.19512
1.05128	0.488918	0.700105	0.9804
0.673739	3.29394	0.764144	1.66292
1.31618	2.96335	0.891829	0.520305
1.19469	4.94857	0.642812	0.751662
1.37029	2.27996	0.555778	1.03264
2.8901	4.11024	0.561814	3.20566
0.748141	0.698519	0.407851	0.759354
1.60099	0.374562	2.017	0.443838
1.72965	0.797656	0.357497	1.91008
1.94695	3.69053	0.491585	0.850379
0.720237	2.19003	0.56535	0.543761
2.98018	0.423237	2.4435	1.89233
1.51225	1.16208	4.43744	0.478752
0.729696	0.513063	1.33934	0.963481
1.12855	0.742396	4.99439	0.627028
6.71568	0.312441	0.504079	1.58041
1.21086	1.00163	0.894755	1.80814
1.32645	0.446888	0.379821	1.30034
1.68881	1.36591	1.33747	0.560064
1.33294	0.739333	1.01319	0.712009
2.19404	0.330355	1.9549	1.46312
5.18292	4.24232	2.38487	0.693042
2.03108	2.55704	0.341155	1.35725
0.990309	0.492588	6.05604	0.753012
1.46717	0.790596	0.364301	0.889076
3.52447	1.55635	0.491892	6.04122
1.53249	2.1464	0.398596	1.01621
2.18346	3.24779	0.539994	0.705174
1.06099	2.07379	0.571147	1.15708
1.78445	1.37139	0.790128	0.65964
1.86021	0.782543	0.825368	2.84512
1.33705	1.43665	1.72125	1.18331
2.73204	1.46273	1.24684	0.891377
4.25564	1.4597	0.786912	0.521511
3.76696	1.86634	5.15368	2.98221
1.61291	0.635537	0.675364	1.26971
1.30578	0.412374	0.91861	0.52371
1.09154	1.56029	0.471055	0.965377
1.91607	0.798952	1.33457	0.397004
1.74758	2.26663	0.711682	0.81997
1.42346	1.95246	0.517783	0.386353
2.18968	0.758376	1.19425	3.06143
1.39523	0.370932	0.714112	0.73448
1.81704	0.580462	0.507425	0.569326
1.6715	1.83094	0.576775	1.60283
1.39009	0.401925	1.81587	1.29663
2.2638	0.712008	0.503966	1.27504
1.73122	0.413292	0.333027	0.624805
1.46443	0.768562	0.69575	0.400854
1.51628	0.450426	0.455453	1.8446
1.46886	0.553428	0.889277	1.74279
1.38326	1.12528	0.413523	0.409693
0.756314	0.705414	0.466341	1.26516
1.76419	0.408817	0.601165	2.08636
1.39508	1.47012	0.500986	0.371769
2.53888	1.16335	0.38592	0.477366
2.18689	3.90855	0.419572	0.462588
2.13353	0.793579	0.461542	0.317691
3.96766	0.943782	0.830469	0.685036
1.36774	0.459492	1.21787	1.33727
2.06491	1.58597	0.423524	0.824116
1.07407	1.49724	0.481517	0.46988
3.30562	0.682777	0.474666	1.12811
0.644784	0.434322	0.531948	4.69684
2.96973	1.5045	3.22173	3.66097
1.17844	2.07705	0.355299	1.12897
3.79656	1.15399	0.741641	1.21406
1.0961	2.15826	0.366786	0.747348
1.55377	0.446122	2.38926	0.782784
1.22629	2.34946	0.668168	0.494992
1.13032	0.780521	0.413238	0.330183
3.02676	1.14866	6.93789	0.61566
3.96418	0.557142	3.36771	0.962582
4.54624	0.701284	0.899376	3.91061
1.51568	3.84453	0.614588	0.989776
0.767654	3.96687	0.52617	1.39987
1.28107	2.99195	0.73342	0.667134
4.09923	2.47195	0.491348	0.398062
2.57204	3.22658	2.91443	1.12588
2.44437	3.02936	0.479509	0.83299
0.994703	0.557774	0.807974	0.380409
1.52353	0.803151	1.81389	0.573882
2.99716	0.838783	0.494587	0.571462
2.00558	0.672292	0.521322	0.50852
1.39748	1.0584	0.746925	2.92019
2.22501	0.399169	0.655584	0.590156
3.43561	0.715375	1.05818	1.35164
15.1428	0.642191	0.43509	1.25749
4.04935	0.384906	1.93853	1.46442
6.04986	1.42789	0.479274	0.890189
10.4942	2.97879	0.958978	0.6916
3.38365	2.55151	0.587815	0.700822
1.05074	1.2432	1.90059	1.22248
1.27005	2.48537	0.60937	0.625129
5.4065	0.957701	1.12219	4.54192
6.91224		0.599702	0.399473
2.62638	1.44446	1.31003	0.620512
0.611995	1.28289	0.592187	1.84302
1.4347	7.00266	0.40562	0.352833
1.68227	0.846725	5.09634	2.08359
2.10313	1.38244	0.846872	1.49994
1.64445	1.69892	0.573716	1.0603
1.05682	0.986833	0.474117	4.86388
0.778763	0.478599	0.710814	2.13074
1.2519	3.46517	0.895863	1.6692
2.10995	0.431064	0.60059	4.27475
1.96617	0.982895	0.924242	1.35371
2.22152	1.3275	0.451998	0.602138
1.19381	0.66386	0.826639	0.493743
2.86264	1.47096	2.60974	0.758897
2.2147	1.76632	0.425583	2.03661
7.19675	0.736969	6.14995	4.81025
1.666	0.624247	0.921621	0.705374
1.08888	1.54027	0.595172	0.689784
3.32599	0.913123	0.827211	1.3174
1.10768	4.26295	2.5882	0.585242
2.71047	0.900777	0.404768	1.37927
8.55417	0.827241	0.908375	3.11884
5.80693	0.718054	0.324838	4.85295
2.31118	0.724636	5.42432	0.542999
1.12638	3.03533	0.797662	0.727712
1.20376	0.949848	0.513837	3.51569
0.718325	0.67554	0.45304	2.93835
0.741214	0.757061	1.04021	0.797763
2.8586	0.537458	0.375137	0.519312
1.30379	2.55739	3.39634	0.393458
2.68093	1.5158	0.714204	0.515108
1.30612	4.61336	1.23232	0.343725
0.82615	0.685185	0.384495	0.808049
1.59815	1.10791	0.439208	0.774062
1.09754	0.710118	0.427632	0.993695
2.7517	0.723948	1.28152	0.852423
2.88358	0.812074	0.541904	1.17258
8.20057	1.0788	1.19134	1.34172
11.1638	5.40884	0.643402	1.21935
4.14572	0.605861	0.765491	3.03968
8.63667	1.2683	3.66376	2.10854
1.95003	0.610469	0.956144	3.50222
1.15902	1.43323	1.50178	0.454059
9.65649	1.50189	4.50649	0.525939
1.58335	0.888151	1.19295	0.361372
1.49252	0.732778	0.446848	0.511377
1.3998	1.21006	0.544647	0.408841
5.98785	0.636449	1.37002	1.9654
1.70804	1.84876	0.752326	1.03709
1.06114	1.29475	0.637055	0.941641
2.26172	0.822465	0.466718	1.20369
0.764997	0.640303	0.518173	2.05274
0.827639	1.2549	0.972802	4.06992
1.4909	0.574933	0.781081	2.73849
2.35085	0.381935	1.29031	1.14261
1.18425	2.36593	3.26811	1.17206
1.85451	0.449469	1.70864	0.686361
2.91516	0.655956	1.8906	0.953397
2.03158	0.702521	1.07123	0.398997
3.88017	1.71392	0.804653	0.493489
2.94555	1.94802	0.534059	0.840619
2.84242	0.427992	0.594332	0.532906
10.0414	6.25617	3.19074	1.48475
2.57	1.995	0.366012	1.25663
1.12817	0.490818	6.30989	5.20518
0.727991	3.09229	0.974434	0.734936
1.17605	1.05405	4.34702	0.352737
1.57331	0.441649	0.752312	1.19825
0.70865	0.351433		1.37489
1.84937	0.836805		0.410699
1.3118	1.47829		5.71328
1.56719	0.689376		1.5425
2.84696	0.801836		0.817938
2.05344	5.14423		5.12561
1.37751	1.34939		5.61499
0.684536	2.00318		0.452904
1.5144	2.07424		1.71265
5.62804	0.445036		1.45443
1.58699	0.783549		0.93442
1.27611	0.556943		0.39825
3.673	2.86046		0.764365
1.53223	0.442571		1.59657
4.49112	0.330337		0.476713
1.6174	1.46385		0.523439
1.08848	1.15531		0.861627
2.90385	1.01343		0.614624
1.38407	0.997578		0.813886
2.22691	0.665612		0.363029
1.135	1.36531		0.596923
2.94875	5.71542		2.4481
3.10503	0.665346		2.11052
3.84656	0.445024		1.02901
0.90047	0.783886		1.79475
1.10165	0.461477		0.902904
1.13961	0.522677		1.37975
2.72024	4.82096		1.30779
2.14408	0.52803		4.32306
0.990082	3.46829		0.500305
2.89049	0.858099		1.25403
1.50184	1.09578		0.735067
2.41318	2.79621		0.374514
1.22519	3.6113		0.513073
1.25264	1.01961		0.69708
1.72492	2.56905		1.55043
1.08592	0.865214		1.23131
1.67975	1.23431		1.25748
6.28057	2.19049		2.56457
1.41325	0.614142		0.71186
2.81073	0.724011		1.72434
1.65375	4.95957		1.85368
2.7264	0.972728		0.424152
1.69465	1.13806		4.59996
2.83275	3.90915		1.31226
1.5602	1.68571		0.407126
0.681567	2.05021		0.887336
1.98543	1.00874		0.96471
1.89234	0.459256		1.02149
0.893084	0.886606		0.95977
1.194	0.520852		1.00394
7.69862	0.541323		0.467139
3.44418	0.659812		3.12949
1.30493	1.00085		0.394264
1.4745	0.822208		0.322539
1.06228	4.62254		2.13717
0.999353	0.815522		0.867457
1.30242	1.32491		0.526613
0.993157	1.24382		5.56267
1.6761	0.683816		0.457087
0.9841	0.517078		0.641101
1.63323	0.92279		0.369638
4.90126	0.802176		2.41737
0.951815	0.478768		0.371062
1.69313	5.61881		0.512228
6.42581	1.59025		0.767905
4.31681	2.9299		0.841324
14.0484	2.906		4.15257
3.97977	0.541476		3.41085
3.79935	0.76303		0.335064
2.69651	0.68919		0.637969
3.90087	7.15833		0.619879
	0.367646
2.22165	1.56866
1.22907	0.757309
1.55792	1.73513
1.03953	2.23282
0.740197	2.47234
1.4646	2.77025
2.4444	0.500119
1.80081	0.477629
1.01224	1.17575
1.24313	1.35562
1.09887	5.25818
1.46503	0.359385
1.21541	1.2621
1.38693	0.445311
0.920847	0.808091
1.35683	0.90624
2.13052	0.485697
0.870749	0.736343
0.780375	0.49399
2.26839	1.59012
1.99868	0.873453
1.32473	1.25671
3.1907	0.849074
0.717261	0.775521
1.71335	2.155
1.30061	0.771138
0.914119	4.15542
0.938379	0.738939
1.19167	5.33492
1.28001	1.10294
4.37857	1.12623
1.53548	0.440458
1.54103	1.36521
0.870867	0.746512
0.736451	0.692458
2.09021	2.80197
2.65215	0.321679
1.31352	1.54198
1.3626	0.51875
2.42875	2.39834
1.49751	1.98251
3.5183	3.92345
1.16725	0.709486
2.14606	1.58901
1.4206	0.824035
1.55418	0.552352
2.95178	1.39304
1.65264	0.550925
1.18757	1.61004
1.34902	1.42364
1.83218	2.46649
1.98324	1.14605
3.88337	0.678068
1.27255	0.807608
0.855254	2.83267
0.990932	0.762022
2.26282	0.885166
1.4638	0.776918
1.3172	0.414874
0.855771	0.543267
1.44799	2.04127
1.69113	0.72146
1.75829	4.61392
0.914957	0.469244
1.27882	0.955716
0.957769	1.85007
1.42095	0.503644
1.91539	2.90426
0.900391	1.39636
0.967335	4.38194
2.41487	0.534344
2.48802	1.57094
8.65156	1.25558
3.11222	0.446635
1.15607	1.08609
2.0387	0.40195
1.88399	0.675143
1.32842	0.801623
1.08507	0.758469
1.57866	5.05749
11.0574	1.40839
0.87933	0.829486
1.67147	0.46115
1.19006	1.03337
1.85274	1.1132
1.00798	3.12139
1.06572	0.977881
0.856264	1.1265
0.783908	0.715632
7.90855	1.0031
2.18746	1.03838
1.0834	1.0703
1.68064	2.05257
3.04547	0.594023
0.810529	0.47051
2.59072	0.479258
1.40578	1.0475
0.926089	0.849212
1.32018	0.589587
1.75734	2.00055
2.17048	1.36368
0.706041	1.33932
1.6448	0.544736
2.35648	0.838165
1.3615	2.77768
1.61193	1.4131
1.56969	0.556059
2.40332	2.49021
2.23839	0.481213
1.5415	1.0333
1.3116	0.777049
1.06555	4.62717
1.86028	4.89298
1.09889	1.57467
6.02443	0.474743
2.18392	1.02486
1.86342	2.34145
1.19354	0.30894
1.20176	1.38684
0.874939	7.44791
1.06514	2.97039
1.5713	0.827409
1.16042	1.40745
1.0995	0.949112
3.14011	0.3995
1.3015	1.06231
1.42969	1.29903
1.11765	1.27986
2.87012	0.448225
1.14047	0.629543
1.75049	1.20706
0.95308	0.552731
2.16202	0.40488
1.40974	0.426129
4.51846	1.20575
2.69181	0.936861
1.05549	1.8366
1.11175	0.535462
0.93982	2.70257
1.1267	0.833513
2.84591	0.655569
3.0801	5.18641
0.818681	2.8347
1.18642	7.54435
1.5298
2.54563
1.15216
1.01494
0.985985
1.72502
1.04443
1.20074
3.2616
2.21792
1.62949
3.09745
0.754361
2.41464
0.942777
3.14506
2.45855
3.07051
1.11061
0.944647
1.35984
1.48544
1.9826
1.37552
0.960242
0.911434
1.09789
0.902687
2.09225
1.63683
1.80147
3.61406
0.825769
2.6845
1.36827
1.87903
2.16567
2.54975
2.11408
1.13292
0.964275
3.51385
0.8934
1.17935
1.01131
1.02904
1.03457
4.25759
1.70057
2.12248
0.754594
0.731719
1.45171
2.64243
2.46669
2.07657
1.01917
1.00164
5.22796
0.891106
3.48994
0.938386
3.6819
4.52238
0.710429
2.29211
3.1505
1.47486
1.74939
3.27712
1.26461
0.956669
0.757969
1.05904
0.73874
2.22629
0.892457
1.3547
1.40215
0.738134
1.5929
2.58414
1.12683
1.04704
0.888304
1.3657
1.15579
1.72887
2.74553
1.18286
2.10693
1.11606
1.18786
5.43459
1.63458
3.34441
1.20906
1.67021
1.20202
2.25337
1.10225
1.91738
0.817801
1.37846
0.880242
2.64744
1.67128
0.792072
3.13826
0.887141
1.17162
3.1381
2.62747
1.19237
4.63384
3.19346
0.920711
6.39619
0.867045
1.53067
1.98938
1.91343
0.809102
1.41098
2.26682
0.954198
1.50397
4.11394
1.43932
2.37977
1.32537
2.00963
1.24967
1.07575
0.741596
1.34034
2.34207
1.64572
3.14288
1.80253
1.92166
1.02664
3.46449
0.960145
1.78923
0.926033
1.85489
3.72144
0.751983
1.86161
1.48115
2.32476
1.47565
1.66922
1.08936
1.31265
1.16405
1.7624
2.25314
1.28993
1.573
4.05631
0.745059
2.64621
1.87817
7.06207
1.44509
0.919354
1.8728
2.21115
0.758868
1.10673
0.908433
1.95463
0.840056
1.85161
1.09226
3.48568
0.69012
1.31532
1.28918
2.40068
2.02011
3.46853
0.907079
3.53785
1.31043
1.38061
1.84704
0.801288
1.08667
2.05962
0.988473
0.724668
2.85927
1.16771
6.07974
4.40024
1.4982
1.45949
1.48327
1.34615
2.6724
2.31036
0.821695
3.8228
0.887929
1.77788
1.01594
1.53468
0.790667
1.48954
1.43073
2.68333
1.32163
2.67036
2.74357
1.94415
3.49075
2.03295
12.4354
1.00954
2.4649
2.23895
2.33152
0.775537
2.50618
1.94177
1.05689
1.66808
5.19332
2.29749
7.79047
1.62387
2.05404
0.991545
1.02394
0.870992
2.85279
5.62548
1.57508
1.10612
3.49882
0.876249
1.05008
1.93088
1.28686
0.761789
1.39968
1.78577
2.1304
1.32808
5.86661
1.16764
0.830447
1.41742
1.10375
2.67106
6.01648
2.12436
1.34253
3.35976
1.01898
2.14618
1.64169
0.746395
1.71474
1.97957
0.764026
0.991784
2.69703
1.46555
3.56642
1.9338
1.22363
4.18406
1.05183
3.98671
1.59216
10.7664
5.31985
0.700855
2.67977
1.34927
2.66288
1.17744
1.86156
0.873399
3.41763
3.76609
1.17329
0.938666
2.47805
1.0654
4.52719
2.43462
2.71894
6.6668
4.18814
1.82732
3.76195
0.887444
1.87621
1.20937
0.851925
1.10424
4.44865
2.53298
1.94386
1.64761
1.50914
1.31703
4.86191
3.34129
1.54966
1.93807
0.926891
0.98033
2.18556
1.11135
6.6971
0.691109
1.53769
2.12967
0.860838
1.13495
3.26459
5.73288
5.07349
0.916391
2.45845
2.3547
3.03233
0.68405
3.4647
1.59072
0.737895
1.30968
1.22704
0.938668
1.17001
3.69303
1.3704
1.31719
1.33748
2.51765
1.9304
1.14121
1.80999
2.47499
0.925994
1.79384
0.770632
0.966939
3.44426
1.25149
0.931677
1.21085
0.972643
3.01365
9.53898
1.21036
4.52934
5.1898
0.984864
7.10462
2.29095
2.45229
1.71037
3.26141
8.33486
1.05023
12.1683
0.918467
1.39279
1.89632
6.19594
3.50835
0.772878
0.813629
2.05194
1.12119
0.943172
1.56886

## Sheet: Figure 3-figure supplement 1C
Veh-0min	Veh-5min	Veh-10min	Veh-15min
0.524792
0.435654	0.823337	0.513514	0.967885
0.570645	0.483523	0.86009	0.877468
0.289313	0.773144	0.63069	0.558074
0.352618	0.86239	0.890015	0.726626
0.637179	0.741163	0.873603	0.299845
0.561235	0.699568	0.728936	0.779036
0.860902	0.779183	0.739603	0.934139
0.474484	0.840412	0.937414	0.88711
0.789485	0.662093	0.634826	0.589504
0.781278	0.86608	0.932505	0.870349
0.577919	0.723916	0.811572	0.83092
0.586559	0.935809	0.694426	0.686007
0.624244	0.690004	0.942638	0.88545
0.594119	0.959029	0.707776	0.894749
0.588943	0.867779	0.555926	0.840018
0.568007	0.598359	0.745993	0.836246
0.737584	0.706467	0.880135	0.782105
0.69126	0.828724	0.492923	0.906084
0.846509	0.614259	0.672549	0.800696
0.552522	0.749293	0.785045	0.788007
0.763213	0.852665	0.812761	0.346135
0.781501	0.674968	0.481462	0.921445
0.53107	0.609618	0.80712	0.820974
0.752858	0.626119	0.5267	0.733647
0.488813	0.896168	0.552917	0.908212
0.744436	0.846281	0.75099	0.87038
0.541583	0.852699	0.684529	0.927776
0.684973	0.427644	0.851964	0.861377
0.49983	0.95662	0.659663	0.557753
0.670983	0.86956	0.830353	0.960872
0.781404	0.664953	0.604495	0.877754
0.633604	0.697494	0.39661	0.635132
0.72207	0.674394	0.794233	0.895217
0.53701	0.703443	0.787201	0.947584
0.695372	0.746351	0.709441	0.879322
0.797258	0.707789	0.646567	0.585863
0.739824	0.85654	0.829088	0.872943
0.660377	0.775678	0.861907	0.727538
0.732266	0.754679	0.695517	0.785251
0.473618	0.764949	0.84291	0.690824
0.497799	0.621503	0.536632	0.727245
0.723507	0.812419	0.716404	0.938905
0.430382	0.727918	0.897582	0.827255
0.561554	0.758596	0.706201	0.891149
0.827865	0.432182	0.752818	0.730199
0.834973	0.712816	0.917734	0.799837
0.533813	0.637403	0.416106	0.840543
0.671015	0.900485	0.672399	0.836351
0.710592	0.571542	0.857053	0.591785
0.849179	0.692834	0.914669	0.882407
0.321419	0.664565	0.664104	0.760467
0.812877	0.427757	0.782863	0.809961
0.794968	0.337859	0.849515	0.645679
0.776784	0.528929	0.722758	0.761241
0.613177	0.600963	0.732817	0.721165
0.678113	0.769872	0.937398	0.949261
0.895446	0.369606	0.616798	0.957621
0.659058	0.829402	0.920627	0.897551
0.821168	0.85766	0.452118	0.66584
0.805557	0.950259	0.897198	0.890398
0.386289	0.395334	0.48508	0.313461
0.435626	0.671146	0.475768	0.539308
0.735113	0.646781	0.93634	0.683138
0.40277	0.665093	0.708154	0.919704
0.739369	0.685276	0.944886	0.783573
0.470946	0.514846	0.630725	0.560967
0.618179	0.740896	0.581589	0.707872
0.58708	0.668701	0.648576	0.710717
0.659012	0.558892	0.69504	0.921693
0.779601	0.793397	0.475471	0.741664
0.788773	0.914701	0.612552	0.606456
0.745613	0.890478	0.314039	0.546474
0.608825	0.913316	0.918711	0.665896
0.609276	0.642839	0.901045	0.892358
0.512114	0.712892	0.883641	0.929612
0.524273	0.739556	0.796614	0.713632
0.557361	0.549997	0.785082	0.812526
0.34227	0.782751	0.935582	0.877128
0.697773	0.690526	0.896669	0.9164
0.613622	0.746937	0.947338	0.882083
0.526624	0.52491	0.866724	0.651829
0.847902	0.641767	0.534617	0.611128
0.462645	0.886711	0.750178	0.617642
0.545545	0.515709	0.868508	0.794333
0.725042	0.856048	0.480812	0.475481
0.79504	0.596651	0.96687	0.653338
0.859471	0.71012	0.892883	0.890374
0.828044	0.857706	0.877253	0.757325
0.668801	0.953408	0.86617	0.823225
0.476227	0.802354	0.669646	0.398814
0.61466	0.407438	0.784613	0.77749
0.398023	0.857353	0.851221	0.890184
0.778793	0.785883	0.676067	0.381352
0.780217	0.432136	0.755134	0.874625
0.777249	0.693347	0.592656	0.779644
0.55737	0.617741	0.483089	0.721495
0.541409	0.874769	0.795476	0.703786
0.73888	0.601305	0.826271	0.362477
0.76646	0.607732	0.821356	0.827949
0.667701	0.662008	0.902123	0.871152
0.514004	0.804547	0.860539	0.527645
0.75392	0.621591	0.556584	0.477791
0.338179	0.442793	0.929224	0.77465
0.560645	0.613903	0.908671	0.364073
0.711841	0.844536	0.758528	0.788484
0.627822	0.724882	0.811657	0.958129
0.53936	0.604035	0.885111	0.81797
0.777675	0.925349	0.765829	0.803008
0.650473	0.877684	0.374665	0.893567
0.529384	0.679064	0.358158	0.695268
0.710672	0.790866	0.560048	0.862153
0.474483	0.733096	0.781066	0.671468
0.566982	0.72725	0.71927	0.918187
0.773362	0.84353	0.396152	0.820225
0.880696	0.775515	0.641712	0.487138
0.660944	0.65913	0.540272	0.695051
0.440722	0.730097	0.486958	0.598851
0.674938	0.516584	0.908844	0.836835
0.426117	0.415256	0.898466	0.407384
0.734512	0.718366	0.556719	0.860156
0.522644	0.872483	0.675664	0.469985
0.443876	0.593116	0.456557	0.664594
0.599301	0.838363	0.926321	0.943099
0.599815	0.910876	0.905804	0.93892
0.675594	0.485612	0.472289	0.612997
0.866206	0.54589	0.319126	0.678586
0.316011	0.437292	0.704638	0.939235
0.433463	0.317567	0.617858	0.908637
0.694933	0.831217	0.906994	0.920592
0.902043	0.663797	0.543821	0.52195
0.877353	0.601323	0.933037	0.861954
0.668188	0.539009	0.489649	0.665243
0.471782	0.821766	0.813117	0.923073
0.424435	0.877519	0.926295	0.562239
0.519351	0.772355	0.403832	0.852011
0.638818	0.648652	0.927599	0.687337
0.853611	0.927284	0.81288	0.781751
0.394552	0.492326	0.934546	0.788677
0.69561	0.708221	0.903769	0.905256
0.447102	0.622144	0.641088	0.597032
0.41673	0.589266	0.589254	0.424998
0.653243	0.684015	0.68391	0.5967
0.246456	0.561967	0.600446	0.675609
0.559388	0.906876	0.414578	0.842271
0.613917	0.821439	0.791278	0.891401
0.820891	0.533864	0.677303	0.880484
0.717088	0.663463	0.702679	0.950942
0.41428	0.498685	0.890622	0.608955
0.780456	0.784944	0.787658	0.558425
0.445222	0.384598	0.815986	0.881151
0.555528	0.425205	0.44184	0.935753
0.564349	0.56398	0.706901	0.638741
0.453161	0.709683	0.380812	0.820337
0.282735	0.452747	0.702955	0.936835
0.885183	0.695985	0.928998	0.889429
0.359504	0.321198	0.7044	0.904387
0.85695	0.688967	0.340066	0.407205
0.872782	0.83076	0.906606	0.751403
0.579539	0.940647	0.903484	0.923273
0.54976	0.786454	0.388081	0.855822
0.628523	0.899826	0.605322	0.938306
0.404017	0.604543	0.729045	0.89743
0.411205	0.767379	0.671593	0.563057
0.469541	0.541391	0.598261	0.91367
0.628601	0.783922	0.492079	0.927052
0.453649	0.55634	0.80205	0.759358
0.659748	0.801051	0.66709	0.788658
0.776935	0.878677	0.810872	0.813434
0.659615	0.798806	0.54944	0.944763
0.37347	0.784976	0.863015	0.8082
0.668222	0.552608	0.94181	0.910239
0.754678	0.802796	0.827597	0.726095
0.340767	0.732071	0.876636	0.358717
0.59977	0.387402	0.630543	0.431541
0.497318	0.799288	0.584033	0.860767
0.500217	0.708305	0.65542	0.788591
0.404008	0.890915	0.431141
0.583076	0.779646	0.54041	0.779226
0.388135	0.806499		0.9527
0.486242	0.889589	0.823154	0.546442
0.87771	0.782756	0.837792	0.925648
0.717132	0.550486	0.761746	0.666142
0.620451	0.78093	0.604827	0.681244
0.574208	0.439498	0.749254	0.573389
0.688241	0.609509	0.843448	0.538518
0.828396	0.755085	0.868988	0.691587
0.927454	0.505621	0.86475	0.650847
0.72236	0.378631	0.773641	0.771356
0.737326	0.424888	0.794334	0.702129
0.620934	0.680038	0.730582	0.745579
0.524439	0.386351	0.916031	0.530171
0.846282	0.698587	0.942024	0.676772
0.668835	0.861271	0.531758	0.932191
0.571367	0.798338	0.938655	0.64882
0.64744	0.49872	0.917847	0.843343
0.917594	0.635428	0.79206	0.772125
0.484542	0.916552	0.546902	0.669091
0.623915	0.675553	0.381836	0.826325
0.937481	0.892782	0.679533	0.797093
0.717053	0.758635	0.412237	0.74197
0.327849	0.8894	0.889853	0.637136
0.778208	0.778645	0.686899	0.599437
0.68902	0.91984	0.921926	0.560001
0.528667	0.544805	0.633095	0.890038
0.662278	0.815604	0.725342	0.891097
0.462064	0.929208	0.624529	0.635345
0.324823	0.449221	0.556437	0.677894
0.6187	0.579878	0.937462	0.658802
0.804157	0.880793	0.35734	0.874117
0.711682	0.786141	0.962349	0.759473
0.512056	0.742484	0.948901	0.386287
0.627089	0.51018	0.8601	0.823868
0.524596	0.46959	0.859539	0.905977
0.791871	0.672388	0.803421	0.717242
0.695727	0.729438	0.613539	0.88325
0.550768	0.828184	0.789807	0.453972
0.733821	0.671176	0.653094	0.642264
0.487013	0.67936	0.617804	0.773009
0.426572	0.676543	0.880645	0.861058
0.336479	0.581951	0.305262	0.538979
0.635756	0.918359	0.895961	0.733442
0.72194	0.965117	0.810984	0.847151
0.629539	0.665285	0.924319	0.795073
0.635146	0.821202	0.633878	0.916525
0.636797	0.521826	0.858484	0.686308
0.572429	0.606201	0.644633	0.93348
0.401686	0.841404	0.684234	0.466179
0.728577	0.863279	0.604697	0.789186
0.652651	0.722476	0.929205	0.897484
0.644839	0.574021	0.850442	0.684211
0.57539	0.674373	0.585181	0.683539
0.55504	0.866026	0.934422	0.735582
0.474266	0.83278	0.959929	0.853225
0.624138	0.848934	0.898222	0.928959
0.556749	0.881009	0.912791	0.622068
0.739265	0.868902	0.603227	0.639227
0.695939	0.800557	0.886211	0.924286
0.819962	0.920958	0.75057	0.670652
0.622788	0.932877	0.926659	0.611527
0.701792	0.728253	0.812931	0.94338
0.530101	0.770952	0.894172	0.915436
0.523365	0.405156	0.941847	0.736761
0.571207	0.82302	0.877646	0.941218
0.388803	0.794306	0.853354	0.825225
0.663887	0.946961	0.661601	0.6121
0.550511	0.639939	0.870052	0.749116
0.773194	0.720584	0.883849	0.902988
0.333465	0.786183	0.92895	0.69889
0.91163	0.9377	0.863641	0.367864
0.505239	0.522533	0.396728	0.349436
0.634255	0.509604	0.902124	0.694598
0.486151	0.757001	0.900551	0.684372
0.678976	0.540303	0.912254	0.843089
0.656776	0.679608	0.554681	0.649162
0.76881	0.633887	0.868096	0.939974
0.724502	0.872395	0.916472	0.937614
0.461909	0.812898	0.333888	0.908601
0.372627	0.79653	0.557151	0.783865
0.450999	0.82512	0.837967	0.459685
0.58167	0.494441	0.851079	0.764867
0.787931	0.516809	0.946374	0.65413
0.759055	0.572689	0.840353	0.717805
0.461206	0.459713	0.906561	0.924794
0.518214	0.457689	0.506931	0.77125
0.539222	0.439154	0.926801	0.622934
0.68352	0.928537	0.794069	0.968079
0.626506	0.850661	0.716984	0.91549
0.397536	0.818457	0.81322	0.503148
0.591944	0.874254	0.879334	0.92277
0.614959	0.802105	0.705656	0.467681
0.462758	0.834454	0.895638	0.923119
0.371423	0.894026	0.719165	0.749475
0.195585	0.907467	0.893887	0.640929
0.379881	0.859898	0.540711	0.660855
0.337082	0.665069	0.920204	0.823387
0.274122	0.520035	0.770004	0.914934
0.433551	0.575372	0.874345	0.767316
0.597863	0.818148	0.654405	0.700122
0.676505	0.579683	0.819023	0.792991
0.361757	0.747877	0.761224	0.39473
0.274464		0.840503	0.934723
0.477768	0.721919	0.704095	0.864682
0.899348	0.772722	0.788041	0.524086
0.672144	0.386219	0.888636	0.945217
0.525693	0.825596	0.413194	0.549923
0.445277	0.617153	0.781355	0.763411
0.478135	0.608054	0.8934	0.774168
0.78621	0.80622	0.912558	0.321733
0.877142	0.95148	0.810083	0.552462
0.55707	0.368255	0.824569	0.646832
0.579208	0.850796	0.863756	0.344158
0.502911	0.847311	0.797342	0.60489
0.575473	0.760483	0.951454	0.874217
0.805353	0.816623	0.85601	0.908997
0.556027	0.703951	0.618606	0.692199
0.615586	0.619312	0.816982	0.514535
0.361993	0.893142	0.29983	0.329966
0.668146	0.911999	0.766542	0.888246
0.714367	0.718642	0.82021	0.731088
0.500015	0.829091	0.825659	0.637888
0.799076	0.468188	0.433197	0.899557
0.483622	0.874169	0.896811	0.703682
0.337618	0.872638	0.814368	0.396176
0.282577	0.900511	0.942735	0.359202
0.563151	0.781608	0.302723	0.913649
0.815302	0.494868	0.833202	0.889269
0.554611	0.811007	0.786169	0.394595
0.818667	0.778276	0.912359	0.476335
0.912442	0.875598	0.800918	0.817982
0.44984	0.840351	0.851641	0.864066
0.73557	0.586035	0.476831	0.912984
0.532215	0.66996	0.744154	0.850689
0.703847	0.434033	0.779042	0.938674
0.791583	0.863599	0.927878	0.798678
0.664564	0.794301	0.917673	0.791185
0.718832	0.915826	0.827542	0.714703
0.387441	0.808928	0.701014	0.760612
0.603132	0.677722	0.89186	0.730976
0.307464	0.771721	0.665931	0.689919
0.28842	0.472486	0.887542	0.649479
0.407841	0.765156	0.849642	0.379694
0.313717	0.683856	0.449993	0.505404
0.592455	0.815235	0.810898	0.318972
0.651267	0.798229	0.527443	0.869584
0.246283	0.643183	0.346235	0.954329
0.648787	0.853835	0.805055	0.885182
0.594794	0.823434	0.903927	0.940621
0.604211	0.67595	0.834236	0.90786
0.395981	0.91326	0.671345	0.640575
0.59411	0.604444	0.816276	0.723315
0.780462	0.747619	0.811285	0.77757
0.550979	0.659076	0.87517	0.791572
0.895102	0.852729	0.912348	0.565624
0.840816	0.765128	0.757007	0.499853
0.574911	0.915026	0.877345	0.618229
0.460644	0.856439	0.657073	0.641612
0.648472	0.412291	0.447218	0.703488
0.646168	0.795714	0.623364	0.896599
0.482409	0.816087	0.558511	0.794341
0.528825	0.920878	0.711428	0.897595
0.376363	0.642404	0.85277	0.806264
0.515632	0.564782	0.782602	0.798431
0.511082	0.708403	0.534215	0.94637
0.35139	0.356792	0.440241	0.672394
0.43094	0.5947	0.949773	0.761185
0.654402	0.871151	0.372463	0.328956
0.915955	0.51227	0.738312	0.823022
0.739483	0.604775	0.384807	0.93249
0.640971	0.687762	0.678618	0.729592
0.716211	0.912447		0.624904
0.577097	0.800669		0.920744
0.741868	0.711917		0.349717
0.63303	0.903001		0.599141
0.45522	0.729255		0.826784
0.573326	0.464248		0.456125
0.715418	0.812963		0.421558
0.817676	0.563088		0.932577
0.601479	0.655142		0.608698
0.297631	0.889376		0.621176
0.507258	0.839421		0.748267
0.719858	0.901071		0.938245
0.447074	0.521326		0.790752
0.563281	0.905664		0.669206
0.334558	0.848767		0.867266
0.628664	0.650867		0.679226
0.73284	0.808604		0.807445
0.474285	0.726829		0.870081
0.684394	0.687451		0.717489
0.593739	0.722749		0.934802
0.774677	0.715867		0.814037
0.468763	0.337731		0.528446
0.368458	0.930368		0.586706
0.404838	0.942078		0.771965
0.644506	0.850576		0.625028
0.689541	0.91506		0.831358
0.715536	0.858285		0.711958
0.39969	0.346258		0.712933
0.48825	0.677147		0.296336
0.564907	0.497587		0.893751
0.384366	0.798626		0.746197
0.622246	0.62866		0.826204
0.58275	0.498354		0.925968
0.714566	0.436363		0.941553
0.612183	0.817952		0.796768
0.566443	0.556882		0.625776
0.770437	0.789709		0.666711
0.505374	0.666446		0.70246
0.29639	0.506478		0.561236
0.506328	0.942943		0.928619
0.544366	0.818463		0.62857
0.573006	0.35382		0.575013
0.454001	0.710619		0.906186
0.670072	0.642082		0.309774
0.454658	0.487495		0.673566
0.624658	0.693131		0.933111
0.893037	0.56261		0.784402
0.509666	0.715713		0.76868
0.514355	0.952108		0.690545
0.867455	0.71723		0.83256
0.669665	0.88914		0.727018
0.295794	0.921966		0.902735
0.471114	0.881826		0.39791
0.721827	0.794577		0.920675
0.632535	0.857641		0.964832
0.759006	0.379439		0.544618
0.725362	0.86332		0.861177
0.666133	0.77096		0.851526
0.714497	0.788238		0.382253
0.635397	0.883612		0.936245
0.681905	0.9065		0.917637
0.682209	0.811219		0.924247
0.332773	0.738753		0.406696
0.811838	0.921537		0.927913
0.528112	0.413695		0.929815
0.314604	0.701633		0.707698
0.476882	0.467597		0.666853
0.247859	0.589767		0.442283
0.452608	0.938331		0.397999
0.360635	0.89031		0.928635
0.586657	0.899599		0.816608
0.331418	0.264306		0.889817
	0.893231
0.624299	0.586011
0.777088	0.844633
0.606222	0.629905
0.667893	0.654945
0.8782	0.56242
0.535682	0.430878
0.578676	0.85051
0.665699	0.849659
0.688193	0.705002
0.717355	0.673865
0.725757	0.445003
0.741763	0.911209
0.644447	0.685572
0.647231	0.873483
0.851004	0.835688
0.718746	0.785177
0.526877	0.902014
0.810023	0.736702
0.872549	0.907456
0.547227	0.67894
0.614013	0.770793
0.693709	0.656337
0.379508	0.839031
0.887352	0.731556
0.555952	0.544635
0.672937	0.726488
0.76883	0.359871
0.829406	0.781881
0.603941	0.327899
0.802238	0.753965
0.480834	0.814131
0.719869	0.869366
0.67731	0.633768
0.834605	0.850675
0.807272	0.804107
0.521511	0.591699
0.520591	0.937999
0.682269	0.733923
0.642697	0.917697
0.450986	0.609194
0.53686	0.687101
0.548452	0.450048
0.695826	0.903016
0.533011	0.64139
0.736346	0.835177
0.50075	0.82518
0.445463	0.746267
0.647738	0.841131
0.656944	0.620057
0.569324	0.785375
0.45594	0.587138
0.57181	0.808159
0.431815	0.804061
0.71487	0.881834
0.839497	0.516001
0.826356	0.866964
0.561029	0.873051
0.544882	0.890052
0.745126	0.793127
0.788766	0.846911
0.660766	0.587737
0.553668	0.895001
0.518881	0.40897
0.764304	0.916057
0.743157	0.834377
0.78304	0.564961
0.560138	0.935501
0.56522	0.464062
0.841315	0.630516
0.827139	0.449363
0.554676	0.815588
0.549251	0.615705
0.250696	0.77001
0.513098	0.871117
0.683377	0.682815
0.622976	0.913395
0.634987	0.632268
0.730854	0.719826
0.762224	0.836038
0.679961	0.342071
0.26263	0.571556
0.755952	0.780604
0.576053	0.910852
0.557622	0.799701
0.675186	0.687439
0.722897	0.43718
0.815173	0.786141
0.816016	0.589284
0.841706	0.853983
0.348616	0.772875
0.544574	0.685927
0.781443	0.677221
0.628441	0.632553
0.574487	0.910414
0.852173	0.949862
0.49034	0.835621
0.711867	0.825425
0.781592	0.880099
0.651627	0.882925
0.514433	0.558715
0.513962	0.74231
0.906823	0.734905
0.583417	0.848104
0.646813	0.811541
0.738368	0.4061
0.636859	0.741021
0.580196	0.87096
0.521059	0.568639
0.620285	0.869729
0.667758	0.760593
0.724912	0.903175
0.680745	0.385076
0.519961	0.273776
0.816753	0.605945
0.410583	0.912821
0.623106	0.750345
0.603671	0.620143
0.598435	0.729478
0.68635	0.841952
0.799911	0.288537
0.847752	0.521573
0.646577	0.886679
0.824696	0.831407
0.746847	0.738006
0.566447	0.851417
0.731057	0.759631
0.66488	0.757021
0.664974	0.727608
0.59119	0.915758
0.684222	0.915441
0.619352	0.82548
0.828587	0.930752
0.567993	0.884055
0.714171	0.914575
0.358356	0.78018
0.539745	0.866796
0.76588	0.643091
0.73126	0.696169
0.766486	0.523085
0.801626	0.855431
0.511401	0.928273
0.533564	0.33318
0.831664	0.596868
0.744096	0.308851
0.629552
0.497069
0.606058
0.819773
0.842303
0.502782
0.820544
0.742963
0.449727
0.557747
0.661755
0.53628
0.884338
0.534092
0.840805
0.531027
0.514649
0.433609
0.77569
0.784979
0.655994
0.606939
0.533775
0.639942
0.815866
0.784345
0.769408
0.830681
0.485028
0.660482
0.522107
0.428823
0.854614
0.450455
0.655743
0.652039
0.503928
0.505135
0.541004
0.839677
0.802912
0.460987
0.834898
0.785789
0.768607
0.79908
0.78177
0.519406
0.61018
0.532694
0.908511
0.870747
0.600638
0.560865
0.589858
0.599546
0.716819
0.74119
0.351118
0.738405
0.4234
0.795557
0.409895
0.425911
0.790369
0.572588
0.441204
0.624803
0.667434
0.382858
0.66608
0.867028
0.824801
0.692293
0.901011
0.497469
0.91612
0.650177
0.705422
0.818791
0.646177
0.530788
0.85472
0.755815
0.733647
0.595324
0.67694
0.683411
0.592668
0.713517
0.602031
0.726756
0.683408
0.307819
0.505736
0.46157
0.739087
0.619079
0.774468
0.614451
0.761629
0.607352
0.838108
0.650191
0.744748
0.604302
0.614605
0.858191
0.508562
0.737341
0.708344
0.476811
0.565744
0.732152
0.375012
0.484601
0.789702
0.383356
0.833008
0.688232
0.59203
0.658992
0.836748
0.583777
0.499469
0.890583
0.703985
0.433686
0.673341
0.481186
0.692124
0.508829
0.721729
0.629838
0.882871
0.745377
0.5507
0.542627
0.504135
0.603549
0.645421
0.706901
0.403225
0.718707
0.568481
0.626777
0.583742
0.350148
0.837819
0.60807
0.621568
0.485538
0.610833
0.708172
0.615205
0.719992
0.770049
0.545447
0.531119
0.688839
0.741323
0.442708
0.90696
0.503238
0.661686
0.365877
0.590689
0.849252
0.652081
0.616745
0.748584
0.715216
0.834707
0.519044
0.900469
0.537592
0.798963
0.396883
0.807873
0.676914
0.695587
0.56623
0.441094
0.435333
0.77361
0.476842
0.695662
0.744339
0.541928
0.845627
0.749744
0.561989
0.831699
0.882675
0.539835
0.679451
0.32007
0.507611
0.627127
0.771466
0.558062
0.722963
0.454527
0.555864
0.848029
0.518616
0.780962
0.494455
0.77802
0.714147
0.802443
0.690061
0.618651
0.571559
0.729268
0.499661
0.43132
0.592845
0.400395
0.635432
0.262158
0.621548
0.597479
0.604707
0.469198
0.879828
0.492273
0.562678
0.672294
0.645035
0.515939
0.563422
0.325681
0.634971
0.56536
0.722138
0.822289
0.866253
0.497981
0.436728
0.668303
0.631982
0.457263
0.870845
0.749785
0.540696
0.76102
0.915329
0.656757
0.668826
0.628459
0.751281
0.489502
0.874761
0.770392
0.613363
0.676608
0.542252
0.431392
0.679974
0.718791
0.447715
0.87833
0.544058
0.72555
0.869483
0.719592
0.549091
0.706362
0.82976
0.536308
0.71186
0.540537
0.677721
0.773076
0.398443
0.559996
0.457145
0.702351
0.293222
0.342032
0.83386
0.554252
0.677483
0.592886
0.717233
0.500456
0.855222
0.407696
0.404493
0.740461
0.824317
0.465696
0.880318
0.374039
0.571101
0.443588
0.355202
0.493127
0.664793
0.44109
0.799315
0.591209
0.751876
0.843131
0.71317
0.443311
0.467392
0.469454
0.679416
0.692463
0.666997
0.364515
0.433114
0.677125
0.62775
0.876024
0.832485
0.531189
0.76465
0.318268
0.856917
0.661352
0.619699
0.719263
0.778757
0.414191
0.331316
0.432765
0.782119
0.485066
0.600666
0.553439
0.905979
0.414668
0.612594
0.895141
0.715091
0.725062
0.778664
0.761254
0.569053
0.62056
0.683792
0.572956
0.477354
0.508904
0.699485
0.662721
0.525144
0.672816
0.616435
0.922552
0.730603
0.462679
0.783044
0.83821
0.790102
0.871602
0.505671
0.291407
0.856265
0.493142
0.388331
0.785439
0.293595
0.472771
0.515075
0.665007
0.484169
0.318119
0.774871
0.248552
0.833131
0.692372
0.522078
0.311733
0.46195
0.83706
0.735243
0.603268
0.801867
0.799267
0.704
