# Supplementary material for: Pharmacologic activation of integrated stress response kinases inhibits pathologic mitochondrial fragmentation
Source: eLife. 2025 Feb 12;13:RP100541. doi: 10.7554/eLife.100541 (PMC11820110; doi:10.7554/eLife.100541)
Supplement: Figure 3—source data 1. [file elife-100541-fig3-data1.xlsx]

## Sheet: Figure 3B
Veh	Tg-0min	HF-0min	3610-0min	0357-0min		Veh-5min	Tg-5min	HF-5min	3610-5min	0357-5min		Veh-10min	Tg-10min	HF-10min	3610-10min	0357-10min		Veh-15min	Tg-15min	HF-15min	3610-15min	0357-15min
4.36139	3.94804	3.34919
5.11362	3.6272	2.32791	4.14669	2.61906		1.50852	3.51544	3.53702	1.63675	3.14961			1.84782	1.18501	1.28621	4.12535		0.608688	4.05935	1.82289	1.90575	1.46788
4.94933	5.13203		5.3299	3.19413			2.13133	2.10006		1.5155		1.9122	1.76668	1.62246	2.46729	2.35678		1.42599	2.39443	1.91675	1.66695	1.23098
	7.6927	4.32945	5.42818	9.02589		1.34095	1.84217	5.59725	3.68352	1.9905		1.70571		6.73413	1.70603	3.09853		4.14057	1.99201	4.5604	2.78419	1.37922
	3.36465	5.34853	4.13292	9.02059		0.772522	2.89474	4.33524	3.6871	1.78011		1.4157	4.23573	2.00155	2.79694	2.97349		2.73697	1.73325		2.71581	1.79546
2.01923	2.89903	3.56316	2.82965	3.34885		2.1088	1.76039	2.05423	1.74837	4.5263		1.00144	2.2538	1.88412	2.06544				1.42078	4.27641	1.91272	1.23295
2.0562	4.69562	1.88127	4.05389	3.46667		2.76601	4.66735		1.76996	2.42989		2.80711	1.74774	1.90074	2.0265	1.13377		1.35137	1.44014	2.03268	1.31892	1.4494
1.43588	4.48879	5.9313	5.64836	3.2064		1.07461	4.3253	1.80828	4.24302	2.20376		1.21958		4.95644	1.76704	1.66838		0.61454	1.67297	4.94131	1.81944	2.45536
4.54958	2.47296	5.1534	4.22176	2.49235		1.11415	2.08365	1.3768	1.48351	3.72055		0.616806	3.41365		3.99977	2.51674		0.78051	1.01699			2.06194
1.97062	3.87199	3.87492	3.77745	2.93926		1.62863	4.62376	2.43859	2.52261	2.26321		3.29215	3.69196	1.79058	2.13461	1.44342		3.18126		2.22481	1.76099	2.17303
1.58033	8.24889	2.31793	3.80185	3.70358		1.03705	1.80254	1.73647	3.85876	2.05865		0.933456	1.85614	1.96227	3.19267	2.42969		0.811111	1.97574	4.25822	3.11212
3.08116	2.9692	2.71598	3.12606	3.2472		1.90517	1.76447	2.3863	2.34747	5.51106		2.03053	1.68371	1.84537	1.74505	2.31808		1.72472	6.27641	2.16468	2.51343	2.76181
4.76987	4.39474	3.58299	4.70451	2.3083		0.605385	1.83852	3.06735	1.98207			2.08978	3.41119	1.35269	1.97822	1.76163		2.00043	2.80344	2.99523	1.67168	5.83984
2.78809	3.04668	2.31045	3.80283	2.9811		1.42371	2.81123	4.5605	3.0312	2.46947		0.714417			4.83337	3.78171		0.734337	1.55414	2.44757	2.0404	1.2561
2.90653	2.72358	3.81062		5.29216		0.819046	2.48343	4.66785	1.61852	2.04082		2.68006	2.61142	2.50005	1.11687	3.76263		0.753143	2.74951			1.72483
3.08593	2.39177		10.8646	4.70461		1.19043	3.19142	2.61203	2.07137	1.72587		4.06026	2.1889		2.53957	1.52039		1.21242	1.82583	5.0564	3.69846	2.2509
3.58797	3.70242	3.78612	7.36714	5.1273		3.37631	4.37336	2.12991		3.61414		1.87098	2.75302	4.49409	2.00474	1.38192		1.40136	1.47533		1.16444
1.79101	6.08223	3.51753	6.63969	3.17501		2.6419	3.11953	3.44677	1.53892	1.57188		0.811417	1.84642	2.79894		3.87732		2.00088	1.69441	1.45756	2.87545
2.31628			2.59326	4.17228		1.51845	2.22701	3.51704	3.16155	5.07924		4.19733	4.50635	2.28866	2.66371			1.14838	2.52434	1.78453	3.93097	2.68339
1.53311	3.53645		10.2594	2.40751			3.29535		1.34315	1.39476		3.23834	4.13073	2.17966	1.30663	1.8773		1.90719		5.89394	1.75536	2.07727
4.45253	4.18512	3.11904	3.36943	2.49896		1.73141	2.94173	3.02916		1.59485		0.852081	2.8073	4.00187		2.77998		1.34798	3.70618	1.35226	2.24744	2.22611
1.66658	3.09255	3.95226	2.57404	2.689		1.34978	1.91626	1.3762	4.15717	2.08865		1.10643	1.94522	2.31487		1.70972			1.86044		2.17159	2.09457
1.61336	7.81067	3.99401	2.72528			1.09438	1.69737	5.15674	2.81461	2.19257			2.20478	6.28937	4.22342	2.30381		0.715839	1.3873		1.94353	3.51833
4.09563	2.83861	3.10812	4.06897	4.24129		3.76897	2.98768	1.86572	2.64952	2.03637		1.23267	3.30526	1.81865	3.46944	3.35076		0.795105	3.30755	3.61309	3.64091	1.81631
2.62828	2.65852	2.77791	3.77878	3.31134		2.95857	1.64159	1.7861	4.08769	1.46587			1.56908	5.15631	2.0572			2.29376	4.34094		4.37209	2.31764
4.37515	3.76957	3.09001	5.35837	4.94739		1.16887	4.69678	2.15499	2.71519	2.65068		0.910889	4.6826		1.83969	2.13618		0.693665	1.38078		2.0521	5.55518
1.76073	8.46846	4.20517	2.19502	8.26109		0.887039	3.77728	1.62574	1.52184	3.6917		2.29361	2.41584	1.4467		2.00699		0.883995	1.70676	2.95184	1.9194	3.26909
5.03904	2.43108	3.63118	7.01525	2.79385		2.13327	1.6688	2.61171	3.10162	2.48351		3.2422	3.72109	3.13542	1.33821	3.05922		0.690491	3.91705	2.31007	2.23144	2.34579
2.55485	2.28936	2.89445	3.90249	4.61544			3.3242			2.62009		1.73496	1.8452	2.15904	2.22611	1.73677		0.693626	1.85177		1.85159	2.53798
4.58383	4.66998	3.26841	4.02728	2.86528		0.745146	2.16025	3.17194	3.17833	2.94291		2.61557	1.79361	7.82525	1.90363	1.29951		2.99914	3.11701	2.56274		3.96341
2.22305		5.81874		4.37		0.968121	1.55502	2.37329	1.53961	1.92756		2.38577	1.16026	6.95234	1.72841	1.65398		0.74114	4.24569	4.1467	1.61997	1.29549
1.4672	7.16862	5.14666	2.45739	3.14286		2.88163		4.26936	4.7428	1.4493		2.55615	2.26424		1.23547	3.88239		0.626907	4.01314	3.53033	2.44681	2.07651
2.59825	5.7794		9.32381			1.73839	1.5795	3.88869	5.2011	1.72166			4.84339		4.89789	2.89249		2.39675	6.43134	6.18341	1.10213	2.61235
1.65628	3.68782	7.29483	3.45869			3.52181	1.88471	5.65435	1.74738			0.958336		2.01881	1.32027	4.75867		0.907608	3.37715		1.93696	1.5808
4.17868		3.60458	10.1526			2.38766	3.66316	1.75011	1.59111	2.15131		1.99926	1.59727	1.7133		2.06946		1.11798	4.35292	3.08739	2.25818	2.18095
2.22166	3.24388	6.73221	4.72239	6.574		0.772324	2.00717	1.6935	2.20124	1.80873		2.57488	1.51712	1.72482	3.10278	2.16319		1.31774	4.00137	3.38967	4.81601	4.33097
1.41291	4.21896		3.60189	5.69048		1.01146	1.86856	4.71989	3.03209	1.92509		2.41868	2.32565	1.88268		5.18012		2.92918	5.77007	6.3652	1.52716	2.16613
2.28296	5.83784	2.2247		3.00846		1.1397	5.55213		1.99078	1.34301		1.96969	2.75668	3.18541	2.25714			1.3895	5.09986	1.74445	4.16631	2.02686
2.98413	3.37867	3.85104	7.4492	4.13289		1.41599	3.09596	3.70805	2.25529	2.60078		1.03544	1.57732	1.96235	4.39945	2.75646		1.01345	4.54218	4.51347	3.38882	3.8222
2.29126	5.20801	4.20583	8.50167			1.97398	2.33178	3.41636	1.54785	2.97707		1.71707	2.35619	1.91637	2.545	5.80365		1.78965	4.38318	2.58323	4.50196	3.56029
	3.06958	3.44338	3.0936	3.11524		1.36107	1.90983	3.32734	3.05022	1.34782		1.61043	1.98679	3.32549	3.47811	1.66749		2.16499	2.28414	2.67699	3.34938
3.52077	8.5886	5.73511		3.88769		3.95956	1.33351	4.09949		3.14836		2.5379	5.30556	1.58781		1.45122		1.24608	3.59435	3.62445	1.74228	1.24843
2.65274	2.43859	2.40422	3.41703			1.2735	2.25868	1.76434	1.44344	2.94258		2.00284	3.94573	1.68861	3.27662	2.68595		0.920431	1.38398	1.20603	5.3586	1.73442
6.07383		3.56847	3.55722	3.98709		1.29797	2.13238	1.59413	2.21644	2.65739		1.48497	4.31567		3.72438	1.6713		1.7163	1.80048	4.14284	2.14457	1.83539
3.19885	3.57196		3.6156	2.16629		1.51128	2.01014	1.624	5.10197	3.98209		1.20657	4.22153	2.73577	2.26478	3.28724		0.717033	5.57639	1.99188	2.30569	2.4911
1.91262	4.84	2.4097	4.69014	3.84121				1.42873	2.40507	3.10532		1.83255	2.0274	1.7701	2.58662			2.30396		2.01874	2.74898	3.92185
1.8854	2.31177		3.75808			2.44465	2.93196		2.52346	6.23255		0.835403	5.84038	2.14893	2.13028	3.34429		0.841431	2.4958	6.09034		2.15552
3.82957	3.14421	2.89005	6.3069	4.50478		2.97742	4.24083	1.35879	2.60461				4.02841	2.1432	2.16483	2.99615		1.54118	2.42778		2.15216	2.1092
1.69613	8.09233	9.60725	3.1866			0.854769	2.16785		1.67445	3.01944		2.07018	2.54936	1.80838	1.26565	6.1371		1.30885	1.73352	2.78479	2.07951	1.82983
1.97114	2.55732	4.73536	3.21696	2.93189		2.44221	1.65447	1.48154	2.48363	5.71767		0.915234	3.53699			2.43692		3.47516		1.66003	4.20917	4.80338
1.49802	4.00507	3.90601	3.06699	3.02374		3.87946	1.87054	2.0191	2.30645	6.00351		0.748016	2.07697	2.0909	2.90227			1.06776	2.12108		1.73624	2.83389
	2.52879	2.78139	4.92262	2.66783		2.84817	2.02666	1.95835	1.83281	6.18433		1.75509	3.03847	1.75687	1.70007	3.97374		2.00486			3.23455
1.66508	8.85837	10.3312	6.88082	3.8133			3.80374	2.04954	2.72104	1.4565		2.40598			5.15567	2.17817		1.2749	3.50633	3.71476	1.92378	3.59179
1.93728	7.0331	2.93464	9.97144	5.24606			2.10174	1.73715	2.03452	2.20721		0.972824	5.21921	4.02701	5.68436	3.3792		1.24535	4.2095	3.54527	3.51698
1.51933	6.76371	7.12354	5.39779	3.28686		3.79544	4.46443	4.55756	3.08024	2.05077		2.50875	1.27778	2.52614	3.82471	3.61439		1.46679	5.18816		2.66738	2.94422
3.13736	2.56062	2.85489	3.57434	3.44665		3.16133		2.52835	1.39188	2.80386		1.12822	7.14351	1.38818	1.06521	2.23882		2.33365	2.68691	4.26106	3.23141	4.30542
2.41027	3.29556			3.96898		1.47362	2.60735	4.0553	3.22964	1.88695		0.844922	2.70641	1.41943	2.87267	2.99962		0.997669	3.69147		1.78849	2.18684
1.22714	3.89634	2.52452	4.58113	3.04971			2.30389	5.87242	2.48831	3.20856		2.11672	2.91697	2.23927	1.67564	1.58275		0.872055	5.72252	2.28693
2.86066	7.23922	1.85026		4.85947		2.09886	1.44558		3.65366	1.8334		0.814266	1.32309	3.2495	1.80195	1.23228		1.3672	7.07697		2.69167	3.3265
1.60035		3.03415	4.9516	4.69622		1.11909	1.3679	3.15335	1.63977				2.35558	2.006	2.27911	3.52335		1.17796	1.85246	1.86005	3.41361	1.67346
1.4516	3.13066	2.64104	3.04177	4.65125		0.585136	2.02513	1.57193	1.63075	3.54826		0.908379	7.19141	1.3279	2.73137	1.3051		1.05102	5.55969	1.40416	1.67896	1.75094
	2.24057						2.13334		2.23808	2.54979				1.9909	2.76307	1.96599			4.40488	5.98054	2.63811	1.58437
5.93118	2.26236	4.68684	6.67367	3.1804		2.6505	5.83875	1.71251	3.01085	2.58957			2.5843	1.48378	2.24793	4.35482			4.32057	2.32017	1.91702	2.37473
2.47595	8.99838	3.30229	2.38391			4.86344	5.20041	2.42036	1.91484	3.98876		0.715065	3.09143	1.3931	3.21769			2.36627	1.95428	1.93855	3.93311	2.3933
6.72746	4.90379	5.50743	8.61484	2.08536		2.6746	1.58289		2.83202	3.12202		2.66282	5.11376	1.15908	1.98146	4.05933		0.696573	1.28336	2.36752	1.78007	2.91911
2.37074	1.91849	6.17787		8.94206		1.63098	1.61442	2.86089	3.07169	2.15102		0.838284	5.86924	2.19795	2.02277	1.60826		2.3349	2.97761		2.88403
5.59549	4.3554	3.50283	4.0347			4.41724	2.74648	1.98481	1.6928	3.07292		1.05548	1.84418	3.598	2.04565	1.61104		2.66082	2.94173	2.22009	3.41076	4.26527
2.5467	2.27552	2.637	6.3071	2.32463		2.22731	1.56289	1.90377	1.96225	4.19222		3.7203	2.41203	1.48078	2.09007	1.81588		2.37898	1.32962	2.21536	1.79026	2.05862
3.06219		6.97731		7.53712		2.1683	2.49332	2.72202	1.62565	2.92694		2.19368	2.47511	1.92353	5.64549			1.69536	3.67245		3.1047	2.83308
2.59642	3.9157		3.12174	4.31099		3.40649	1.65568		1.18954	1.58611		2.95493	5.64579		1.85977	2.00127		1.31591	2.62003		2.83464	1.76179
2.27052	8.79358		4.05038	7.17994		1.44328	5.93839	2.87984	2.40425				1.59211	1.09585	2.47799	1.13512		1.95435			4.46204	2.98281
2.24392	5.10117		8.0976			0.864178	2.07977	4.15597		2.24284		2.45804	4.6588	2.28087		3.30613		3.80924	1.81959	3.32344	4.56465	3.28981
2.00579	4.38608		4.50568	4.2942		0.704651	1.68517	1.4208	1.96729	1.14815				2.78346	2.62529	5.48491		4.39082	6.26294	2.68222	1.28897
3.16792			5.77299			0.768085	1.40985	1.20315	2.25771			0.938934		1.62324	3.90561	3.40678		3.23151	2.93034	4.08317	1.72638	1.79453
2.58041	2.92573	7.17216	8.22934			3.24138	1.79304	5.1463	3.36181	2.46996		0.852203	2.63414	2.32041	2.92126	1.33916		0.7752	2.94046	4.58819	1.50424	1.86356
3.67308		3.52827	9.73545	9.241		1.92346	1.27187	3.37183	4.45294	3.88978		0.732706		1.83628	1.89658	1.96617		1.21733	1.83861	4.60604	4.55775	1.70769
4.41247	4.30485		2.19614	3.01205		0.837616	2.55289	2.5641	3.32836	6.55515		1.88507	4.57214	3.67145	1.66626			1.95573	4.84315	4.24815	4.62045	3.3341
3.93887		6.48431				0.677834	1.79914	1.53394	5.78798	2.6724		1.06839	1.8121	1.46219	1.96778	2.28302		1.41044	5.31717	3.46339	1.58693	1.5536
	3.80249	2.71602	7.77567			1.25259		1.5576	3.95312	1.90379		1.01424	1.14908	4.91542	2.38123	3.90828		0.916565	4.78221	3.26566	1.78741	2.20575
2.09565	3.77355	2.57321	8.36283	6.51123		0.739727	1.73558	4.4451	2.12589	5.82004		0.710342	2.3394	2.10962		5.01506		0.725687	2.57668	2.09335		4.40202
2.7167	6.19049	4.91781	4.17901	4.09053		3.21384	1.96056	2.27378	2.4928	2.72282		0.713167	2.47105	1.34014	2.85932	2.00311		1.20071		1.9026	1.2079	1.36417
3.68218	3.01254	2.30775	3.79229	2.57265		4.63097	4.69717	2.01078	1.82737	2.10178		1.14204		1.86733	1.83495	2.826		4.16763	2.06469	1.73292	1.53292	2.35757
1.44165	4.67036	5.09514	3.47543	2.5704		2.63256	2.12155		2.72049	6.70097		2.95426	1.27496	1.91167	1.73099	2.37786		3.47961	3.93574	6.27357	2.4867	1.73571
	6.14184	3.30061	2.70595			0.703979	2.06696	2.46425		3.64069		1.80096	2.1479	3.7138		2.74305		3.45116	6.84022	3.40157	1.89822	2.01393
4.20459	3.17522	4.19823	4.4013	6.30782		0.683033	1.99767	1.19486	2.7984	2.12659		1.13995		7.55108	1.46304	2.33176		1.86161	2.36933	4.80916	2.93587
2.27278	4.89736		3.87368	3.54835		1.12022	2.50088	1.76559	4.97377	3.19412			3.04163	5.69997	2.32873					3.40432	1.32542	1.55025
2.0322	5.56722	7.90391		3.27495		2.34047	1.71885		1.91395	3.62118		0.590828	3.56359		3.98733	2.29114		2.60764	2.91787	1.13529	1.61227	2.24884
1.28513		4.32049	5.77399	3.93135		3.2819		1.49525		2.15765		1.09953	2.60992	1.92147	1.71318	2.26196		1.19359	1.51911	3.47922	1.70746	1.89658
1.71682	5.73185	8.10254	3.63799	7.56494		1.04143	3.39265		4.07243			0.725349	2.05766	3.15199	1.48963	1.2955		2.46196		5.88113	1.62612	3.24377
1.96724			5.43922	5.10712		0.930298		2.03808	2.38539	2.84612		1.22075	1.88683	3.3597		2.60773		1.10335	3.94663	4.11307	2.25323	1.35967
5.92266	4.38342	8.76164	9.01917	4.61456		1.29332	1.85476	2.07623	1.98565	1.83521		2.81923	4.00841	1.56748	1.86791	1.38127			1.39624		1.58734	1.61547
2.34806	6.08128	6.57682	2.99353	5.12298		1.67527		1.55066	3.4051	2.20412		1.82607	3.02221		1.73983	4.06583		2.00603	1.50713	2.03311	1.97425	1.66263
	5.25259	4.36803		5.13013		0.758453	2.18143	2.14766	3.60948	3.88246		1.41145	3.14098	1.70809	1.40697	3.2991		1.12793	4.4783	3.72959	1.7296	2.20387
1.97999		3.80401	5.64014			1.47049	1.48472	2.60616	5.24647	2.21904		2.34504	2.61267	2.9189	2.42475	3.64315			2.19167	3.94543	1.70975	4.94227
2.20789	4.21206	3.00085	3.45296	4.55977			2.13083	5.06517	2.45119	3.82626		1.76591	3.03758	2.62559		1.95561		1.70078	4.65026	2.21725	2.01157	1.67015
2.02512	3.20972		7.14072	4.29512		1.09555	2.88266	2.06181	5.46578			3.92009	3.28508	1.9243	3.21433	2.1741		1.73272	1.96418		2.30884	3.70141
3.3393	4.54067	4.87276	2.80095	2.34592		1.44221		1.64474	2.88222	2.50319			1.30689	1.68543	5.00539	2.25988		3.68247	1.76235		1.37133	2.9884
3.03691	6.72837	2.70451	2.79655	5.03809		1.57537	3.19978	1.50597	2.0435	1.56751		1.87378	1.41832	1.5052		1.6611		1.04736	2.53022	2.88748	2.41513	2.23032
2.11122			2.80118	4.80933		0.820038	1.95048	1.86395	1.79875			1.19382	1.7196	1.66655	1.25944	2.33548			1.99865		1.57851	4.68698
2.68858		9.28884	2.44938	3.4015		2.55127	4.40816	1.79761	3.02785	2.97421		1.50813		1.36239	3.2496	2.69073		1.51081	2.03021		3.67513	4.77933
3.0657		2.69186	3.36602	6.59446		1.61691	1.88348	2.19417	3.5971	2.18807		0.906319	1.18284	2.72533	1.58049	3.39384		0.843269	3.51535	3.88689	3.63008
3.67817	5.93693	2.59759	5.77053	11.5433		1.02858	1.38984	2.24692	5.33026	1.37441		0.800468	1.73048		2.47055	1.43829			2.20877	2.44669	2.29554	1.9176
1.7403	2.80901		4.48959	5.11771		0.843971			2.50441			2.40642	3.34499	1.45965	2.99791	3.06758					4.94216	2.1597
	2.4968	2.78481	7.93672	3.51878			2.49848	3.01596	3.45383	3.81123		0.724026	1.79622	3.8194	5.75536	3.06667		0.973198	1.64793	4.818		1.94895
3.65626	4.22646	7.04688	2.52575	2.63095		1.01431		3.61755	2.89254	1.99006		0.88446	4.20907	3.75249	1.77416	1.25529			2.32506		1.5718	4.99744
2.13479			4.88612	2.9524		1.6575	4.25184	3.40532	1.74789	1.60332		2.41292	1.68543	1.42655	2.12257	2.24533		2.2281	7.27771	2.19143	1.21992	1.88679
2.78096	2.83854	3.1366	3.13301	7.79631		2.22541	1.21632	1.77358	3.40542			1.58633	2.62194	2.13178	1.62251	1.55856		0.920845	2.47308	2.02092
4.31865		5.38194	2.51648	4.61055		0.968353	3.25993	1.6362	4.0067	1.90498		1.27612	1.73603		3.40671	1.24271		2.04288	1.17612	2.47901	1.26569	2.08391
1.87159	3.14867	3.7367	5.18363			0.682343	1.34064	2.01959	4.11787	1.42576		1.76051	2.07371	3.51151	1.26805	1.31139		1.24146	2.16395	1.61299	2.62896	1.8663
1.95838	2.04001	2.37146	7.86136	5.43873		1.60919	2.3003	1.33474	2.9988	3.5523			2.94842			1.9417		1.45322	2.30626		5.68114	4.97894
3.89734	3.38746		2.83765	5.01294		0.863853	1.68918	3.60542	5.90202	3.56074			1.63291	1.97677	1.57404	1.86184		2.5381	2.06511	2.88555	4.29052	1.30547
1.82661	4.92321	2.49896	9.8418	5.30167		1.31405	4.00405	4.00609	2.24271			3.19373		7.40943	2.11049			1.98407	6.17552	2.7216	1.30242
6.12616		4.47426	2.85921	2.22026		2.43557	1.55981	2.70988	1.75824	2.27854		1.79381		5.14858	1.85256	4.85735		2.33874			1.20855	6.01485
3.75548	3.89996	7.05966	3.87012	2.68442		2.88234	1.881	1.86878	4.86404	2.73945		0.984411	1.64522	1.61448	4.81283	1.74992		1.38403	1.45702	1.71244	3.35904	1.72104
1.48278	5.4321	2.28528	3.31198			1.82784	1.55808	2.09112	3.24223	2.37616			6.59814	1.4758	2.30054	1.52272		1.98704	7.67778	3.25046	2.14471	2.03992
1.25791	4.27077	9.88236	8.31635	4.62442		1.51346	3.19459	3.08447	3.24467	6.36056		2.27069	3.08889	2.5947	1.73811	1.59863			2.22952		3.22077	1.47103
2.31488	1.96365	3.02477	5.64641	2.00141		2.12098	3.05159	1.2552	1.28471	3.26285		1.15281	4.22814	1.93481	2.24415	5.13906		2.76431	7.27773	1.71249	1.62817
6.49168	3.53396	4.9105	3.74234	9.55251		1.5077	2.40278	1.03046	5.36287	1.97567				6.67666	1.7361	1.17915		4.35336	2.33193	1.98121	2.44704	1.75288
1.8241	2.84344	6.11932	3.75251	5.85225		4.50335	2.8599	1.96597	2.42262	1.96332		0.843796	2.07571	6.32668	1.16236	3.52301		1.35644		2.33959	1.59141	5.27012
5.31517	3.1939	3.88497	4.14154			4.85332	2.8494	1.79314		3.97412		1.16623	3.51421	2.84925	4.15294	1.73366			4.24654	5.60286	2.07389	2.29283
1.34991	4.38397	3.91982	4.70361			2.7134	1.65578	1.93596	2.58777	2.11559			1.69229	2.95358	1.88787	1.43304		0.788712	2.71982		1.62713	4.57635
4.57588	2.40978	3.16573	3.74126	3.38467		0.895737	2.06378		2.61937	2.98682		2.57753			4.98725	1.67066				2.56273	4.60953	1.9715
5.20117	8.48257	2.69263	9.86895	2.51785		4.3582	2.58546	1.58312	4.23569	1.96982			1.64351		2.05839	1.33892		2.68829	1.47634		1.95419	1.86478
3.55837		5.40895	11.2952			1.00999		2.25297	1.5414	1.43423		0.859848		3.29089	2.39176	1.57161		0.850021	1.48834		1.41334	3.48509
2.04662	4.45042	5.1609	4.50313	5.04279		1.02367		1.83374	1.2279	6.09167		0.838737	1.9987		1.70902	2.12595		0.892784	6.55672	5.46616	2.82145	1.88492
2.58212	3.15782	4.52915	2.6926	5.36472		0.801521	3.76502	2.36886	1.99419	3.57834			2.16457	3.38364	4.01547	2.08632		3.29201	1.66951	1.27607		1.34141
1.76872	4.51395	4.07236	3.26563			3.19576	6.48745	1.27295	2.3998	2.19814			1.44886		4.94766	1.44251		3.47886	1.21049		1.78521	2.22755
		1.97802	8.23894	7.01318			2.59305	1.72834	3.49141	1.82441		2.45633	2.9944	2.22177	1.45912	2.33818		0.836838	1.90292	1.96379	1.57299	1.79462
4.58137	4.3163	3.74051	3.12816	3.79024				1.18679	2.32231	1.05158		2.67082	3.24276	2.60789	1.57431	2.63896		0.930618			1.48735	2.31063
2.15076	6.28578	4.81715	4.38672	2.69917		0.902786	3.215	2.95107	4.87777	2.68829		0.638149	2.81083	1.97797	3.60909	1.93136		1.2696	5.7187	5.26717	1.28276	2.83761
1.25409	2.3799	4.51283	2.09529	3.27393		1.76034	1.84372	2.48292	3.10292	1.40558		3.36763	4.80926	3.23727	3.4632	2.25978				1.19604		5.57846
1.46893	6.88697	5.05098	2.47929	4.55055		1.43875	3.14063	2.11039	1.84106	1.58904		0.773717	2.76105	2.3345	1.80487	3.68597		1.70394	5.77537	2.67046	3.74358	1.54079
2.22054	7.8451	5.68809		7.82734		3.15862		6.11086	1.86092	2.53102			2.25804	2.55362	3.06037	1.94991		2.51856	6.57869		1.50857	3.0299
5.09514	4.59456	4.59059	5.01798	4.18397		1.49059	2.47288	2.91789	2.18126			1.22678	3.43518		3.23412	1.4906		1.42422	2.72747	4.61728	1.83324	1.91076
7.20022	8.24454	7.27315		5.22851		1.17276	1.56741	1.83079	2.91033			1.056	2.33209	4.21684	1.57975				2.41263	1.17328	2.70118	1.97256
2.78862	4.25772	3.17252	3.71625	5.60165		1.08282	6.09153	2.64303	1.94761	3.45379			1.54853		4.45811	2.26464		1.23486	2.96136	4.62209	1.30737	2.8522
2.0444	9.29656	6.11799	6.21138	5.58119		2.18337	2.28596		2.82344	2.5517		0.776905	2.79505		3.95134	1.63629		2.07055	6.81506		1.63716	2.55666
1.84863				5.72655		1.05692	1.53394	5.63478	3.9821	2.21296		1.74456	2.1259	3.24707		3.98833		1.02102		2.53296		1.36463
	9.25587		4.6745	5.82059		3.45033	1.27959	2.33663	2.37333	1.90251		0.703407		1.1977	3.04324	1.5125		1.39653	7.27937	3.00069	1.31662	4.73708
2.15356			6.12449	9.71094		1.27114	3.06618		2.27082	2.25312		0.764999	1.68575	1.79415	3.97457	1.42562		1.22511	2.46714	3.38024	3.15588	2.50413
6.34346	3.60422		4.86771	4.17295		2.72437	2.91796		4.46019	4.52098		2.92655	2.43399	5.1315	3.94436	1.87018		4.06101	2.50438		2.52253	4.80364
6.65527			9.75467			3.44923	5.57589	1.67744	2.53872	4.36037		3.50494	7.12573		1.6553	1.73191			2.50969			1.18163
2.4851	4.50553			3.58798		2.68716	4.83638	2.57701	2.67323	1.27294		1.30914		1.50407	5.52432	4.96979		3.25291	2.10022		1.66851	3.09673
			3.00945	3.105		3.95351		1.66827	1.9136	2.63889		3.60192	3.87174	1.57715		1.84529		2.42275	7.46268	2.5824	3.41557	1.90267
3.38734			2.88768			0.777073	2.48711	1.53756	2.72536	2.00705				1.88762	1.82722	3.74031		1.4816	1.80654		2.04882	3.40019
2.73754	3.08803		2.45252	2.87518		2.1884		1.90052	5.80766	1.7249		1.84242	4.83682		5.40257	1.52366		1.26377	3.97739	2.8743	1.37255	1.86835
1.65804	3.50577		2.70333	4.40977		5.06285	2.20998		2.15747	1.33836		1.8675		1.50029	1.69815	1.66902		0.931402		1.90379	1.40831	1.47146
2.67557			2.70464	9.43794		1.63651	3.07837	4.41452	5.29633	2.00163		2.38169		1.5579				0.712158	7.56495	3.79347	3.09096	4.72713
	3.34786		8.92344	5.55789		3.68236		2.38564	4.55363	1.56534		0.658417	2.07452		2.48968	3.74285		1.83486	2.51656	5.89067	2.67565	2.79969
2.18864	2.17566		4.08858	2.7358		1.32679	2.14333	1.54243	2.26369	5.02386		1.76499	1.93694		3.98203	2.29621			1.86792		2.16088	1.48315
5.29332	6.69647		5.49696	10.1189			2.98834	1.89961	5.80767	2.80682		1.1958			3.59635			0.988222	4.00153	4.16374	2.30449
4.25684	2.51881			2.59614			1.38916	3.48018	2.4844	5.56484					2.12152	1.99283		0.735116	1.83549	3.35881	2.71365	1.86831
2.7352			3.64939			1.90603	1.89485	3.89664	1.32113	4.03417		2.60251	4.62827		1.53145	2.98355		2.87296	5.00185	1.74314	1.82592	2.56364
5.99614	2.63803		4.48751	3.60286		2.08726	3.95123	3.81919	2.48525	2.60748			5.5264		2.26926	2.05437		1.80513	2.74277	5.95471		2.52676
	4.28433		4.6916	3.56749			3.98404	1.27307		3.33232		1.61188		2.69653		2.58361		0.691442	1.84761	1.19199		1.62318
1.39671	4.18419		3.38139	10.217		0.92881	3.2422	1.49358	3.41181			0.921799	2.0057	1.57072	2.81376	2.55225		0.863967	7.19559	1.51495	4.31111	1.51484
			4.08201				5.80456	2.16023	2.91985	1.90596		1.49033	1.37971		2.13761	1.82035		0.84202	1.82598	2.1764	1.85949	2.18199
1.38355	4.58859		2.36011	5.45735		2.77387	1.83638	2.16418	3.72087	4.05563			2.63282	1.77666	1.29203	6.07501			2.79781		2.22387	2.78335
1.70188	3.14037		7.98537	11.4782		0.977097	3.99567	2.36565	2.20307	1.71977		1.16634	1.55081		1.35013			1.94346	4.09909	2.27177	6.14159
2.3336	2.3818		3.26038	4.85549		1.06117	3.62148		1.59913	3.39343		0.986351	2.84181	4.98014	2.44431	1.36709		1.16227	3.82319	1.75443	1.52718	2.84356
4.79362			4.85213			1.19411		4.77023	2.2149	2.69427			4.89058	3.74198	5.53887	2.39331		1.19389				1.27657
2.49209	8.73444		5.60778	5.70158		1.12379	2.77003	4.02293		2.30291		2.55263	5.42464		1.878	2.85391		0.731813	1.28445	3.72125		2.40993
6.00872	3.58508		2.90897	2.76974		4.18498	6.43058	4.69444	1.65814	1.88273		1.99541	2.60091	1.8076	1.75573	2.88268		0.917307	3.98018	2.51779	1.52489	4.05782
	3.52047		5.96402	3.24878		0.748774	1.51184	1.18699	1.91322	1.84492		3.45464	2.82617	4.31486	2.28772	1.25343			1.92735	2.32908	2.45033
4.65297	3.65103		5.80571	5.53628			3.91626	1.51056	1.94956	1.75661		2.23982	2.66681	1.35552	3.62296	2.43028		0.773145	1.17089	1.91305	2.11585	1.31605
2.27969			2.37389			1.92979	1.51487	1.91824	2.05175	1.68745		3.15203	1.33975	3.26306	2.29367	5.39306		0.707285	5.52305	2.73881	2.09264
	3.37544		4.7861			4.72863			2.23452	2.59334		2.00329	5.07033	3.08679	2.92337			0.720764				2.99252
2.11261			3.51913	4.99934		1.99429	2.71118	1.72075	4.8138	3.07738		3.01319	2.7071		1.49897	5.8358		1.86189		3.3775	5.23812	1.17573
1.4357	3.52855			2.79465		0.62254	2.04224	3.92739	3.17207	5.24944		1.33739				1.61113		1.61164		1.54922		1.67559
3.52315	9.18935					0.841288	2.2038	1.98458	1.50619	1.76458			3.86586	2.82946	3.12153	3.21893		0.961777	2.91564	2.80812	5.14198	2.80166
6.90725	6.05139		7.26003	3.81249		1.65416	5.46992	5.56293	3.40817			0.847415	1.51705	1.90504	1.4362	1.13478		1.09522		2.1853	3.02583	1.44408
2.38094	4.53266		6.5429	5.37186		4.94408	5.85094	1.73205				0.623619	2.16338		1.48233			1.11612	2.88781	4.8187	1.85385	1.25105
1.73374			3.62209			1.77909	6.53479	1.35167	2.3589			1.30483	2.90033	3.70556	2.26973	3.85078		2.55816	3.40775	2.09505	2.09273
	4.21087		2.94045			1.19622	2.96291	1.37074	3.16405	1.74144		1.33326		2.90276	2.31923	3.34839			2.46918	2.34486	1.3642	1.29065
3.98096	7.00038		2.96518	6.29341				2.31127	1.29188	4.13804		1.18536	2.85447	1.22013	1.41695	1.35871				2.31346	2.16493	3.87277
5.82655	3.44108		4.73957	3.47027		1.20705	3.24917	1.43501	2.40768	6.33164		1.35043	3.77657	4.43305	2.04117	1.20406		1.33549	1.83163	4.72186	1.50815	3.95591
5.95271	3.12189			2.23902		2.6631	1.23005	1.05543	1.95284	3.59951		1.94633	3.36273	2.27806	4.94716	1.4343		1.35742	6.88005	1.68899	1.55216	3.40154
5.77338	3.30837		6.23615	3.83641		0.865692	2.57002	2.25621	4.75407	2.00524			6.71067	1.68648	5.7119	2.81061			4.45146	1.11021	2.15502	3.11571
2.89278	3.77383			4.04455		1.12553	5.02667	1.94331	4.38328	2.04076			2.19939		2.70365	2.123		2.2492	1.50326	2.48311	2.92673	2.20246
5.97705	6.11714		2.25975	5.24888		1.97096	3.31375	2.58766	3.04833	2.62199			1.24861	2.58619	2.94014	4.48271		0.595825	1.90314	2.1769	1.63914	1.48454
2.92591	2.6054		7.32991	2.9139		0.796478	2.14447	2.5274	2.45386	2.88907		1.82526	3.55363	4.35975	2.06992	3.24986		1.72912	1.45867	2.0328	2.53811	4.28994
1.20321	6.49864		5.99194			1.19913		1.51498	1.83762			0.931351	1.41158	1.55392	2.49628	4.30774		0.733616	2.84262	1.59625	2.84067	4.12737
2.18523			6.84094	5.92719		2.82441	1.19895	2.39742	5.4929	3.78549		1.09727	1.82763			4.50486		2.24191	4.31129	1.67827	3.13201	3.43256
3.74645	2.78306		2.84981	7.67969		1.19133	2.06788	1.47042	5.39388	2.0775		3.52456	1.68193	2.9186	1.84504	2.19303		2.56933	1.8473		2.50326	4.21406
2.18361	4.50091			5.86267			3.62444	4.14757	3.00687	3.87666		1.69518	2.88197		1.92535	2.45577		2.50042	3.55487	1.56038	1.69461	3.68582
3.56204			3.2393			3.54766	2.2969	1.70693	3.96371	3.75856		1.575	2.45648	2.98772	1.85811			4.00419		1.47324	1.7781	2.08181
1.89562	3.6067		4.77906			0.858841		1.37346	1.30883	2.07421		1.20302	4.30965	1.47546	2.47009	2.18538		1.66072	1.89017	1.67456	2.2329	2.62163
1.27925	5.90665		4.07348				1.71853	2.04826	2.56284	1.74016		1.41697	2.34739		1.19129	1.79937		3.2438	3.43403	4.14574	5.44888
2.59098	3.34142		3.20598	11.1331			3.03387	5.49595	1.42073	1.93216		1.44246	3.3181	5.79489	1.48161	2.24901		0.961601	2.63564	1.5652		5.94587
2.1335	3.84712		3.64301	2.50818			2.17388	2.49202	2.53542	1.6828		1.04794	1.88208	4.26527	2.67806			1.4431		2.96476	3.7605
2.70192	3.37944		5.33593	4.52213		4.68781	5.63372			1.86482		0.890086	2.40765	2.37796	2.32708	1.57172		1.65337	1.54671	1.64031
4.78968	6.27027		7.90409	5.26779			3.00221	1.46055	1.72315	2.37877		1.00401	5.56942	3.09401	4.43723	1.58881			4.18184	1.86444		1.70269
1.38612	9.0616		5.87279	9.7239		1.18047	1.3313	2.07816	2.23169			0.71302	3.34242	1.57599	3.21856	2.54404		1.18015	2.20237		1.30226	1.61111
2.75141	6.31608		2.86789	5.33355		0.628208	2.22756	1.20602	2.79391			3.78473	7.00793		2.56583	2.71725		0.6173	3.42333	1.88308	2.36136	2.0728
3.35126	7.18469		2.31353	6.30225		1.52353			1.43444	3.8952		0.635376	2.27171	1.78848	1.80141	1.52326		3.30431	4.24393	1.92784		3.30571
3.6544	5.31133		3.79588	2.45077			3.19579	2.22008	2.02525	1.97572		1.0069		7.30989	1.58071	1.56191		1.62088	2.80726	2.41076	2.8989	1.55061
1.21			7.27844	3.54002		3.8283	1.39797		2.24953	1.97088		0.966764	2.2362		2.49641	1.69032		1.00983	1.99904	1.63554	2.69123	2.32642
4.90983	3.10617		9.12459	5.06453		0.750877	3.31358	2.0141	2.33679				2.76655	2.03474	1.7324	2.01123		3.20039	1.62933	1.92747	2.83007	3.35329
3.06123	3.79495		2.1054	6.77905		1.96898		2.15896	1.82263	1.54212				4.64417	2.57306	3.04581		0.852554	1.88737	1.82603	1.76127	3.42194
1.32101	3.07514		8.82416	6.71668		0.954445	4.23793	1.91428	3.16234	1.42992		2.35557	1.46536	2.42268	3.19159	2.29333		1.94745	2.65684		1.81226	3.88284
1.87395			4.77432			0.978695		1.86517	3.30442				1.85384	1.92148	2.04092	2.41216		1.07568	4.69157	3.1622	1.87993	1.5191
	6.81836		2.13383			0.542582	1.2989	3.09148	5.30396	1.47373		0.76873	4.54997			5.43293		2.76678	1.24581	4.62508		3.68144
2.11548	4.22824		6.29788	4.39808		1.78951		2.22506	5.19469	1.59731		1.46409	3.06288	2.9557	2.81626	3.46889		3.10883		6.3917	2.75775	2.96108
1.89181	2.08121		2.84027	4.5571		0.801704	4.44567	1.70107	3.50195	1.65445		0.686035	5.29008	1.51078	1.9694	1.63175		2.59158	1.40558	4.2925	1.25179
2.91479	3.62549		3.14008	3.51588		2.73289	5.9918	1.53507	2.34871	1.69097		2.76868	7.3289	4.78494	4.67265	2.02562		1.02385		3.2416	2.75457	2.12186
2.27032			5.68054			1.28413	2.99341	1.57515	1.75027	4.00154		1.80099	1.78232	4.7277		3.09169		1.22489	3.22948	2.94242	2.43817	1.80769
4.54996			6.64965	4.27332		0.58749	3.26414	1.35826	5.87251	3.0175		3.28629	3.03397	2.73383		3.25943		2.67899	2.87348	1.53339	2.58497	4.79866
	3.16265			2.77332			1.99232	1.41266	4.78981	3.75589			5.01001	2.50049	2.7829	1.97931		1.0807	1.69321	4.61497	2.63498	2.3881
3.39343	9.30888		2.61937	3.33377		4.56326	1.94544	4.75168	1.71002			0.60524	2.19534	3.04264	2.81599	1.45144		2.72683	2.22347			1.89524
1.77098	3.60222		6.24292	4.31131		0.853241	4.68134	2.01926	1.96051	2.30762				1.98486	2.8063	3.67934		1.38654	4.42326	2.36677		1.97612
2.67273	7.86424			4.94598		1.32008	2.86185	1.26156	1.96202	3.47048		0.654198	1.6217	2.76109	1.85761			1.52484	2.72543	2.26835	2.29341	1.45532
5.51756	3.84535		5.07169	5.94732		2.80493	3.71814	3.07287	3.14017	2.32664		0.895967	2.81653	2.01995	2.41486	1.32387				4.65802	1.6098	1.70341
2.85089	2.3819		4.26481			3.79788	3.68852	3.00812				0.764999		1.59551	4.36112	3.36963		1.65413			1.48009
3.78421	2.54377		2.89472			4.87595			1.40515	2.6344		0.957146	2.06287	5.62576	4.5615	2.01028		1.16317	1.27452	3.62949	3.85809	1.71442
1.84029	3.27087		3.75699	6.34764		3.71687		1.99493	1.90491	1.60512		0.840206	1.48904	3.8577	1.77031	3.9596		1.909	2.87492	1.81492		2.32149
3.0634	6.32764			4.59306		2.4616	5.5957	1.65612	2.18837	3.34049		1.45973	1.64568	3.88703		1.80758		1.17048	3.72367	1.55199	3.71595	2.48448
3.7123			2.72961	3.52931		1.3111		2.69282		3.62203		1.71091	3.47151	3.01224	5.10058	2.62806			3.0022	2.22758	2.38008	2.21938
2.14679	4.72968		3.59108			2.54031	1.50354	1.32829	3.04391	1.85855		2.90852	3.33837	2.04408	3.42327	1.15913		2.25256		5.22549	1.78314	1.4286
5.19176			5.09886	3.55175		2.43212	3.26468	4.73802	2.00459	1.30226		2.36212	6.67017	4.27419	1.74556	2.33271		1.49474	6.79716	2.84077	3.30825	2.49698
	2.15691			5.23081		2.51434	1.95553	2.09726	1.51839	2.8728		1.34489	5.13338	3.73611	1.66629	1.62576		0.917755	1.54836		2.43429	2.83433
7.14151	5.91556			8.25112		3.8073	2.4374		3.07376				1.93438	4.18857	1.94538	2.87411			2.24897	1.75217	2.10318	3.53406
2.5647	2.77097		3.95064	2.31573		1.1135	2.68254		1.30688	3.28821		1.39304	5.0367	6.13222	2.00504	4.61516		2.36239	3.70402	2.2449	1.44007	2.73339
2.20393				8.43594		0.725471	2.39384	1.71957	1.69147	2.05154		1.65229	1.938	2.19599	3.47244	1.6759		0.952625	3.04509		2.59454	1.54999
1.72024	4.67485		5.9503	5.07513		2.55117	5.40417	2.85032	1.56984	3.04864		0.735801	2.38567	1.80178	4.04003	1.57314		1.81158		1.61266	1.50437	2.18211
3.81017	4.44465		10.9331	7.41668		1.23116	2.65561	2.64583	2.07291	1.79307		2.51781	1.58556	2.25661	5.11216	3.14077		0.685608	3.31146	3.29183	1.85815	1.77116
3.2074			6.37479	7.91933		4.02691	1.9335	2.50587	3.063	1.90295		1.41875	1.73696	2.03816	3.65486	1.43563		1.60033	2.10085	2.68023		1.34325
2.96806	7.2292		3.3546	1.86477		3.71892	4.21497	2.41561	1.44994	4.11367		0.896088			1.72708	2.6215		0.701504	2.74446	1.82367	5.50734	3.16271
4.15961			4.27982	11.4926		1.29033	1.76744	1.55438	1.97179	3.21746		1.66254	2.74187	2.27043	2.22014				1.71566	2.94818	1.59416	4.26976
2.7019	6.77413		2.93763	10.5305		0.6213	2.97102	2.1846	5.84804	3.84984		1.21848	2.99273	4.40405	1.43416	5.82722		1.17797	1.61196	3.68963	1.84317	2.45674
2.88094			2.10222	6.98059		1.01566		1.9558	3.02432	3.71348		0.838978	2.21997	3.07644	2.1894			1.09208	2.06925	4.03308	1.86469	1.49306
3.07298	3.80848		2.71218	6.17204		3.31895	2.78125	2.87994	2.48461	1.7164		1.0561	3.02042	3.25153	2.74467	1.97747		2.50329	3.55954		1.91008	5.04753
2.90354	9.01278		1.90968			0.682745	6.50867	2.02937	1.53649	2.71404		3.17915	3.28915	2.99905	2.23538	2.00101		2.72442	1.68738	2.05319	1.35169	1.64455
4.54489			4.6819	8.02934		1.29842	2.92226	2.13947	1.48352			0.80087		2.72722	4.23961	3.56606		2.43699				2.24766
3.40632						0.752769		2.07713	4.40151			0.572456	2.32159	3.79562	5.6719	5.2559		1.27618		1.37158	2.20528	1.94417
2.77664			8.03588			1.44784		3.35141	2.70638	3.69047		1.31467	1.76829	2.15456	1.76352			0.665289	2.47827	1.36448	1.32115	1.61678
2.77242	4.32411		7.05826	4.57631		0.663441	1.50681	1.3671	1.56618	2.35296		0.601892	1.20373	7.63585	2.03762			2.91064	1.79742	1.69035		2.11031
2.39447	4.08942		7.34233			0.984474	1.93127	1.24639	5.71134	5.94901		1.5429	2.97859	3.19196	1.75806	2.86378		2.96305	3.55794	1.55191	1.74078	2.5253
2.26059	4.42619		3.02386	7.37859		1.92102	2.80135	1.51838		6.02026		0.739506	1.77219	1.73436	2.15369	2.11267		0.707298	2.75971		3.91388	1.44984
1.52523	2.23974			5.55902		1.38224	2.86887	3.43495	2.61453	6.23474		0.903221	1.96199		3.83177	1.46544		2.30669		2.96131	2.68417	1.76298
3.13511	3.81602		3.84494	2.02029		0.754959	4.4206		2.167			1.19732	3.37353	1.97111	2.03603	2.07296		3.78095	2.6168	2.68068	2.07354	2.28258
2.33039	6.08939		2.95274	5.07858		2.66122	2.89194	2.2007	2.08187	1.97601		0.813095	1.74464	6.56112	1.65873	1.72803		0.63707	3.5466	2.41032	1.552
4.8094	2.7952		3.60331	4.16087		2.03699		2.50105	1.98476	1.83285		0.697704	1.40485		1.97899	3.27471		0.876633	1.62302	5.22856	2.03276	1.68048
4.00933	3.42802		9.99748	4.80202			1.54926	1.6012	4.941	6.61631		0.808083		2.17132		2.19379		0.813919	1.15894		3.99127	4.42538
3.63269	2.87881		6.58			1.39427	3.82973	2.08566		1.80056		0.725273	2.92609	3.3386	1.80428	2.0224		0.574516	2.45675	4.58981	2.30333	1.78305
7.16539			3.27579	2.49879		1.63832	4.61731	4.40272	1.52054	1.65125		1.46273	3.35743		1.42624	4.79677		1.10183	3.14217	1.24137	5.04043
2.35636	5.26616		3.06343	6.34338		0.87664	3.58319	2.14319	1.37056			2.28749	3.2825	1.96162	2.49292	1.59849		2.43649	1.64308			2.41483
3.27209	4.88398		7.30369	4.89081		3.04365	5.27407		2.07218	1.50478		0.761673	4.24896	2.10328	1.82621	1.91971		1.70271	4.29385	1.25559	1.99548	1.61318
1.93743	8.28487		2.87546			2.55745	2.37818	1.45159	3.38233	1.77796		0.854443	2.1757	5.99489	2.51577	1.84551		0.8423	1.59103	2.71085	2.88483	1.45805
6.44865	2.68952		5.71249	3.31863		1.21237	5.32154	3.99758	2.24756	2.84811		0.690582		2.90364	2.85989	2.53292		1.56269	3.24977	5.9424
1.28695			9.34388	5.36699		0.768379	3.16959	2.44428	2.46612			1.02884	2.22849	2.12103	2.39805	1.72009			2.34393	2.2852	2.58858
4.93179			3.67509	2.63718		2.90565	2.31037	4.31051	5.50129	1.13413				1.77826	1.89948	1.65835			1.64841	2.60811	3.70774	1.93564
2.02605	6.49399		3.28607	8.82459		4.08708	4.22111	2.37758	1.49939	1.65514		0.633371	2.17428	2.30171	1.40454	1.92613		1.75364		2.78194	1.27007	6.03596
5.60427	2.46994		3.78816	3.44904		2.22124		1.29104	1.19954	4.65596		1.48181	5.12805		2.12217	3.67509		2.15373	2.01423	1.61089	1.38361	1.88191
1.90602	3.41909		3.34786	3.0737		3.94028	2.43188	2.82801	1.68171			0.641605	1.54281	2.31723	3.15271			1.17619	5.52224	1.17017	1.80986
3.10442	8.33346			3.97501		0.805389	5.9846	2.76534	1.96902			4.11298	2.90939	5.57224	2.81335	1.70255		1.55511	1.59603	3.3494	1.24631	2.84557
1.92955	3.26676		3.43923	3.07426		4.56331	1.94197	4.31017		2.47534		1.22277		1.44083	1.88933	2.1355		0.916908	5.88257	1.43967	1.50912	4.1835
2.24237	2.46359		3.74784			1.28769		2.25246	2.52661			0.72316	5.90415	6.27029	4.30421	2.51415		0.595211	1.32001	2.92872	1.53071	2.88376
5.86921	4.76		4.12225	4.10727		2.25241			2.03174				4.73621	1.99406		1.77994		1.08563	2.92524	1.89095	2.37884	1.52358
6.6549			3.67783	7.94286		0.94783	3.40456	1.39235	1.5003	1.46222			5.15066	2.12241	2.37677	2.10178		1.689	3.91421	1.51216	3.02995	2.06519
	3.33545			3.64847		1.29053		1.28367	1.87859			1.57399	5.58078	1.27159	1.13316	1.78198			1.95168		1.55181	1.82621
2.55103	2.68864		6.26807	3.05067				1.09582	4.30196	2.08506		1.08078	1.94871	2.70154	1.74192	1.72537		1.62428	3.67461	1.33787	1.54082	4.19073
1.66109	4.20352			3.54693			2.79864		2.74573	3.38207		1.07253	2.88044	1.22715	1.68977	1.38596		2.59998		1.98053	1.6868	3.49588
2.2618	2.24063		2.37439	2.88973			2.08935	1.68601	1.37839	5.60439		1.07066	2.18776	1.83825	3.03111	4.74181		1.17556	5.49216	3.90417	1.51298
7.07047			4.25967	3.93625		4.45851	2.03604	1.23465	2.60711	7.0098		0.788593	2.16339	1.54365	2.77378	2.86797		0.716217	3.01852		2.67983	1.7561
4.28423	4.81553		5.26602	3.47305				1.32425		5.17268				5.46763	2.27877	2.80035		1.93707	3.55379		1.63338	2.77942
3.31138	9.2024		7.1963	3.80112			1.18865	3.95465	3.04582	3.9205		0.634645	1.59815	3.06592	2.84984	1.95454		1.48026	1.71849	1.87119	1.27136
1.80126	3.79786		7.60962	3.91428		1.12109	1.62556	2.20151	4.43322	2.47081		1.45833	2.65016	6.45042	1.31605	1.56189		0.672485		4.64073		2.50902
2.7669			2.72215	2.34155		1.52875		1.37215	2.35412	6.49205		3.10676	1.87261			4.67544		1.1667	1.79359		1.5079
6.16634	9.51166		3.72731	4.42023		1.68369		1.89114	1.69944	2.87097		0.858849	5.92452	1.46398	4.27638	4.95699		1.0879		2.24663	2.0427	3.40071
3.78191	3.45937					1.11917	2.02296	1.34651	2.90632	1.74507		0.97628	4.01609	2.41565	2.98227	2.44815		0.849873	2.22182	4.88032	1.51735	3.05551
2.44276	3.69426		3.89833	10.9209		1.8576	2.06338		3.13772			1.30514	1.74229	3.46122	5.0112	5.15935			4.3535	2.1931		1.79666
3.99371	7.81712		2.79949	8.82558		0.686489	2.12434	1.661	2.4255	2.15588		1.11078	5.21248	1.84945	4.48107	3.30271		1.14835	6.74199	2.34941	3.55166
6.05604	5.46943		4.4661	2.76118		1.22738	3.12498		4.1095	3.01062		1.91894						2.65059	4.45406		1.64006	1.57224
	3.7763		5.93767	2.84949		1.22926	2.1935	1.74634	4.01727	4.73683		0.746521	3.87565	1.69942	1.30078	1.36607		2.30637	5.09546	2.0504	3.04404	3.14454
	6.81794		4.15268	2.57539		0.696064			1.74974	2.55459		3.4453	5.46965		1.53121			2.6256		4.85305	3.34586	2.52626
	2.07531		6.85565	3.45611		2.79453	2.382	1.13145		2.51403		0.7275	1.63563	1.60708	2.5691	2.61267		1.56989		1.62945	2.02563	1.62157
	4.97055					4.95628		4.84157	2.80399			1.65257	2.32875	1.64594		2.27283		1.34344			4.59891	1.67191
5.24296	3.21117		5.53612	3.24156		4.58955	1.72202	1.55196	3.37785	4.11903		0.923416	2.83075		1.8566	2.56801		1.16555			1.8106
1.71979			4.4707	2.5144		2.02356	1.77725	2.12311	3.61771	4.13625		3.1857	2.64905		2.02709	1.61025		2.07563			5.4536
2.17096	3.52745		4.16252	8.57544		4.19844	2.72738		4.13618	3.78518		1.11536	4.25378	4.15647	2.08655	5.42179		1.07603			1.55051	5.98146
	3.57018		6.38981	6.15153		1.77713	2.07369	1.46427	3.53823	2.63345		2.00348		1.82054	1.55451						4.33082	1.04432
			4.20596	5.3009			4.33586	4.41422	2.09698	2.26161		1.09711	7.3038		3.94072	4.42117		0.726036			1.57134
5.42445	4.8638		3.13592	3.49639		2.38746	3.02919	1.17895	3.44344	4.92404		2.54862	2.84729	1.49885	1.46357			1.03488			1.84747	2.45965
1.179	2.97621		5.39421	4.76969		2.41083	1.52105	2.6128		2.61776		1.05227	1.71061	1.4238	2.30832			3.48215			2.24299
2.82429			5.23291	3.50781			4.07659	1.22848	2.33205	2.22991		0.710922		1.6548	5.69957			0.618462			4.65364	1.89888
2.62			2.66927	3.56321		1.41611	2.31495	3.83022	3.15487	2.79483			3.78224	2.14913	2.80667	1.99857		3.87415			2.86734	5.08406
3.86131	2.0118		6.98048	3.7248		2.80554	3.14898	1.54703		1.62651		1.39158	3.97019	4.13524	3.86049			2.88602			1.32738	2.26743
3.3325	1.96565		7.03486	4.27026		3.60638	1.42807	1.71819	3.47552	1.49246		1.01421	1.49789	4.40536	1.33444	1.68782		1.9896			3.00452	2.74776
2.00016	1.4556		2.91429	4.23407		1.94997	4.279	1.80919	2.07006			0.720178		4.82791	1.67272	4.10804					3.70258	2.75129
1.53568	1.93768			4.94249		0.814644	1.68774		2.09833	3.51461		1.32984	1.25827		1.3043	1.49265		3.70736			1.26789	2.16041
2.43243	1.7522		3.54516	3.7401			3.30228	2.37685	1.81018	4.91478		1.82598	6.59106	1.87542	1.96991	2.76622		2.94842			2.9377	2.71449
3.23022	2.1681		4.77526	4.44686		0.65485	3.30157	3.73567	1.70296	1.36268		1.06546	4.53054			2.11933					3.63889
3.70371	2.75019			2.84054		1.81964	1.69083	3.44888	2.00066	1.45741		1.94016	3.24487		3.87406	3.63265		2.24379			1.15343	5.86779
3.79483	4.03896		2.97716	2.57396		2.20975	1.47942	1.66422	3.35051	1.65891		0.764984	5.35038		1.07294	4.35712		0.979195			1.49535
1.8665	4.67892			3.67799		1.28761	1.92599	2.11151				1.50466	1.65359		1.59721	3.09878		0.787398			1.80581	2.36268
5.18995	3.74088		2.83213	2.71871		2.37251	1.57259	1.71288		2.88548			3.30108		2.66206	3.36448		1.33127			1.89732	2.65091
3.45079	3.13843		3.52061	2.96821		2.89426			1.83349	3.51266		0.718536			2.8226	1.62452		4.08431			5.06297
	2.16236		3.73383	3.26211		1.44508	1.65305	3.46524	1.49429	3.29946			1.66239		2.12524						3.43222	2.68326
2.58705	2.10933		2.60353	3.07816		1.12227	3.88747	3.49976	1.94273	1.2042		1.61635	1.57078					1.19227			4.02366	1.47274
1.94102	1.19755		2.81259	5.24281		2.81561	2.20998	1.28921	2.871			1.01118	2.30649		1.54706	1.89071		1.06956			2.34233
5.94706	2.24111		3.87725	5.16703		1.6672	5.12109		3.47502	6.09278		1.53242	5.10063		1.88408	1.56875		2.35408			1.65571	1.31312
2.25188	1.8006		8.20528	3.77127			2.69696	5.11549	2.90768	1.18128			1.27866		1.89328	1.78361		0.973885			1.45518
5.10142	1.73685		5.21145	9.64053		1.78313	2.12619	2.14901	5.10283			0.820213	4.59816		4.50668	4.96336		2.01393			2.45085	3.46293
	2.55479		2.70094			1.65248	2.01514		2.64546			1.66765	1.53075		2.86646	1.3339					2.58228	5.5748
	1.51116		5.29762	2.95306		1.24142	4.09397	2.65585	1.64774	1.68161		0.575592	4.76841		2.09688						1.58431
3.90504	1.79302		4.32929	3.1123		1.1949	1.97545	1.76608	3.6528	4.76119			3.52922		2.03305	2.44527		1.13869			2.36551	1.71583
2.02842	3.65792		4.87117	2.73417				2.00639		5.88351		1.55174	3.11955		4.26187	2.69041		1.20207			2.32401	4.45664
2.23976	2.13734		4.16172	3.63355		1.96822	1.46219		2.48034	2.67065		0.85051	3.53053		3.34432	1.83877
1.33021	1.9915		2.72729	4.99024		0.995472	4.45773	2.57509	4.12269	6.03687		0.81531	1.78078		2.19658						1.69131	2.74173
1.28918	2.47432		6.77038	2.98879		1.46954	2.72658	1.25166	1.65364	2.49542		2.02506	2.10425		4.53847	1.32648		1.48875				1.81255
5.96532	2.91348		7.64367	3.79544		1.09534	3.15815	1.23683	2.84342			0.652954			4.785	3.13993		0.866302			2.83892	3.20551
2.29645	1.18918		3.88213	3.75354		3.95629	1.56554		1.75239	5.16674			6.79728		1.72704	3.59361		0.685898			1.55581	1.74111
4.6775	1.82883		2.45143	4.55909		2.86005	1.63638	4.3358		4.797		1.01671	2.84935			4.95477		0.976948			3.90386	1.53036
1.9857	5.7977		2.1268	4.0304			3.02246	1.17881	2.93906	1.39961		2.18416	3.72871		3.78697	1.30798		0.622856
1.38334	1.96909		10.136			1.11824	2.4217	1.67505		1.8174		0.667324	2.7137		1.38188	2.66711		1.56365			3.54382	3.38672
2.52625	1.5074		5.25259	4.84527		2.03778		2.9573	2.10979	1.92002		0.775574	1.83076		2.63572	1.45295		1.34863			1.88692	1.29588
1.86742	1.65474		3.79586	5.5889		1.44775	2.66133	3.72579		2.66753		0.763542	2.04546		1.42786	2.98073		1.95174			3.80063	1.9733
4.98049	1.34683			3.45774		1.16171	2.72008	3.01702		1.63479		1.95575	3.5827			4.48572		1.61			4.40726	1.73732
4.5359	2.62816			3.82181		1.48949	2.35194	3.43408		2.14684		1.01532	2.0313		1.93521	1.1853		2.58222			1.49198	3.73232
	8.91441		2.72068	4.12667		1.92473	3.19495	2.69154	3.9497	2.3287		1.91517			1.2429	1.86416		2.5747			2.00655	2.37604
	3.74194		2.85264	9.25753			3.26048	2.95654		2.13896		1.22626	4.47263		3.41795	1.56894		2.40082				3.51477
6.30909	1.20976		4.22407	2.90938		1.02251	1.43536	1.66978		2.12381		1.22148	5.66261			2.08835					1.39885	1.21568
	1.97729			4.06526		2.14077	4.55882	5.00335	1.61701	1.87943			3.47574		2.18385	2.78326		3.716			2.23201
3.0676	3.25133			3.70278		1.12436	1.91145	5.67988		6.53272		1.74151	3.71156			3.44995					3.00485	1.95576
2.78803	2.71193		3.16754	4.79553		2.42285	2.37189	4.52714	1.67983	1.59021		2.93378	1.49078			2.05659		0.76606			2.82496	5.50046
	1.65324		6.15564	7.34874		2.72301	5.94901		4.12901	2.02038			2.34074		1.56205	2.40568		0.90501			2.37774	2.11161
2.70578	2.0225		8.53179			1.63754	4.96275	2.53265	1.55552	1.28291		2.00935			1.59612			0.631142			1.64447	6.06128
2.26746	4.19874		4.15222	3.90879		1.41875	1.62201		1.92628			0.702332	4.50691		2.04008	1.76521		0.917965			2.52378	1.74392
2.60083	4.34811		8.15954	4.43311		2.08232	1.81446	3.67746	2.42367			0.86768	3.42765		2.5826	1.93725		0.746284			3.83944	3.98804
	4.09453		5.40328			1.23164	3.52083	1.72171	1.58937	2.10544		2.14525	4.96528		1.40462	5.99872		3.40786			2.01574	1.82018
2.69859	6.29824		5.03371	2.86241		3.75626	2.14995	5.22176	2.6293	3.63962		1.36221			1.36423			2.08118			1.68507	1.51966
1.86913	8.12007		2.4448	3.19239		2.35034	3.90266	2.22994	5.12364	2.0329		1.09291	1.58288		2.02629	1.68207		1.44677			2.37305	1.6329
3.68791	7.37988		3.99712	3.37798		1.33368	6.51729	3.49271	2.60675	2.12765		0.823706	2.45431		1.94707			1.90288			1.68256	1.22873
1.32368	1.39637		8.53176	11.1401		1.13652	1.59774	1.56033	3.03614	2.04527		0.946291			2.27568	6.13001		3.39615			5.17931	2.02142
1.49266	1.77393		4.57643	2.61967		2.41368	5.09847	3.84955		2.13783		1.56307	2.51318		1.565	3.55272					2.17683	1.58946
2.6166	3.78845		5.8647	3.80391		1.12229	3.6342	1.99195		2.1638		1.31403	6.70755		1.91874	1.78438						2.62497
4.55611	1.52598		5.6128			0.692402	3.65201	2.1523	2.90989	1.4982		2.0089	2.50056		3.65503	2.5207		2.18985			1.15308	1.52294
1.99983	6.49206		7.6853			4.29379	3.8871		3.75314	1.77129			1.97512		4.4945	1.6237		2.10014			2.30486	1.36703
3.11353	2.12211		3.88196	8.4711		0.74704	3.15805	5.08324				2.90377	1.32064		1.22383	1.86036		1.18333			5.05957
4.87262	3.6885		5.99767	4.14629		1.15792		1.76483	2.01276	3.66334		3.49143	6.52226			1.67125		1.73125			1.53576	3.3889
3.62856	1.68832			7.04575		1.27027	1.82377	2.94488	3.49416	2.42293		1.91401	5.45584		1.53476	2.98009		0.705757			1.16819	1.28658
6.25441	3.06137		3.35543	3.75505		3.48625	2.07801	1.2648	3.47183	2.84429		1.6131	2.66544		4.18472	3.64251		0.856207			3.09599	5.18692
5.26257			3.57001			3.94028	1.28925		3.748			0.99017	5.02589		2.11386	1.75683		1.58519			2.05274	4.68396
4.88036	3.52017		4.82344	3.45957		0.722992	2.38754	1.43896	2.09998	1.35811		1.0032	2.98717		1.47138	3.81336		1.05101			2.23442	4.44851
	6.19702		3.90698	2.59625			2.22099	1.43856	2.21704	3.21957			3.39816		1.53688	2.604		2.63105				1.75536
4.62523	1.55919		9.89049	8.31415		3.4882	1.36577	3.1204	5.3415	2.95399		0.661667	1.75843		2.29938	4.11997		2.29562			2.07515	1.87956
2.10789	1.04983			2.95052		0.725908	3.82119		2.05307	2.03798			2.62619		1.88492	1.55921					2.3978	2.02035
1.19401	2.10242		3.17296	3.59795		5.01367		2.92157	4.68899	1.61259		1.67301	1.59564		2.88084			1.39769			1.51803
2.31935	3.51367		6.19965	3.42852		1.67691	2.16849	3.1007	1.9634	6.68903					2.12522	5.01012		0.630066			2.59927	1.87703
2.72445	1.42865		2.44942	5.04308		0.757843	1.66206	2.10554	3.11532	3.55957		1.26906	1.89665		2.18544	4.66137		2.09549			3.33593	3.79076
1.35404	1.23299		2.59559	6.76331		0.634621	5.68761	1.68687	4.42142	1.26495			2.70227		2.97346	1.37387		2.22454			2.30589	2.18883
3.44283	2.77847		1.96469			1.53328	1.88983	0.990715	2.784	3.95853								0.734016			4.48232	1.58073
2.34963	7.01099		4.53867	6.76151		2.65806		4.55183	2.31477	3.17018			4.50124		2.37459	2.34734					2.28468	2.54444
2.6254	6.03304		4.86908	4.18227		1.34068	4.7221	1.74995		1.97488			4.47641		2.06527	2.85279		2.89331			2.13552	5.88445
5.11093	1.56854		5.38055	4.26402		1.42849	3.87534	2.86529		1.52564						2.0136		1.29688				2.28607
3.31091	1.62457		2.68187				2.64466	2.69481	1.68122	5.18415			2.18885		1.70491	2.76525					1.89269	5.71687
2.42483	1.55121		2.65697	9.0202		2.21487	1.80566	4.1216	3.93557	2.35567			1.564		1.94463	1.49446					2.90398	2.82185
1.33463	5.29877		5.3837	10.564		3.81052	3.70999	1.70477	2.1612	1.56945			1.81342		1.46674	3.28409		0.844078			2.11559	2.81649
2.68415	1.5646		10.8695	10.0704		3.42757	2.71613	3.37211	2.33222	5.8715			1.77687			3.44261		3.12547			4.36409	1.43596
	4.94542					0.815166	2.22206	4.07134		1.61766			6.31612		2.80261	3.87439		2.54453			3.80828	1.90555
3.03732	1.61867		3.98856	11.365		1.53844		2.21495		1.59092			2.14963			5.75234		1.68421			2.22894	2.77604
2.3862	1.56221		3.59489			1.03723	6.63525	2.98272	4.74334	2.72416			6.22713		3.6181			0.696671			1.34251	2.21146
6.10925	2.55573			4.22799			2.75697	4.20932	1.92246	1.47226			1.93116		1.72902	2.36324		1.40064			2.24391	1.03848
2.53532	2.83685			3.79354		0.767052	4.25054		1.83233	5.84875			6.97949		3.01793	3.70234		2.54036			2.02983
			4.18149	3.741		0.599192	2.18834	5.68915	2.3907	2.07455			2.05981		2.75053	2.8757		0.819187			2.02501	1.88365
2.96819	2.93047			3.73524		2.59166	3.91746	3.53852	3.03331	3.97803					2.74804	3.77398		0.919292			2.32046
1.97353	3.54523			3.46669		2.02243	2.24654	1.93718	3.50734	6.15919					3.87196	1.97829		1.46501			1.31621	3.20396
4.65002	1.58072		2.61416	4.86211		1.82277	1.85076	3.55901	1.84754	4.53407			1.76007		1.89504	1.84434		1.16893			2.43027	1.72118
2.13507	2.62099			5.49814		1.62956	2.46494	1.56388		6.59005			3.31017		2.75129	1.68782		1.38225			2.25639
3.76424	1.68335		4.61462	3.03545		0.938572	3.24735	2.39405	3.74214	2.71898			2.40971		2.71326	3.12038		0.651405			4.62914	3.15432
1.85372	2.04846		8.22076	3.23126		2.32332	1.9242	2.65025	1.69699	2.94054			2.43752		2.28928			1.04684			1.23165	5.63468
5.18806	2.77635		8.37615				6.11738	4.37512	2.6057				1.96714		1.47925	4.03199
5.21426	2.29842		2.66488			1.10196	2.41294	2.08123	2.70485	3.70444			2.19636		1.38188	3.52005		4.37548			3.24263	1.46155
7.21731	1.45717			4.3783		0.707024	5.65924	3.16429	2.53863	1.81515			2.29279		2.16161	5.63708		1.77579			1.93993	2.86777
1.72277	2.35178			2.91279		1.51712	2.37028		2.08801	2.73349			3.36478		4.01492	1.91158		3.05003				2.01973
2.05484	4.714		5.25861			0.831121			3.66605				2.35506		1.62937	2.32244		1.57158			3.41772	1.6391
2.05236	2.08711		2.35928	2.62932		0.927057	3.02466	1.84209	1.71069	3.78815			2.57289		1.80508	2.13707		2.34787			3.3783
5.03024	2.46042		3.61786	4.28168			2.3054	3.28148	1.85386	2.05567			3.07465		1.20741	1.78629		2.45223			4.09467	1.63932
3.89586	3.11511		5.57887	2.53922		0.837593	1.49575	2.13339	3.37678				2.822		3.5407	1.43943					1.92256	2.51764
1.6813	4.57726		10.8326	3.79825			6.27208	1.47621	2.28742	2.71381			3.38176		3.32108	2.19092		0.957581			3.02821	3.4408
6.56746			7.83745	2.66556		1.63379	1.83843	1.76316	5.21147	2.56807			2.19578		4.3988			2.21492			1.64792	1.7376
2.65552			2.91232	6.65674		1.8022	1.74123	2.17515	4.85435	2.84781			3.14996		1.85844	3.63661		1.34022			1.86317	3.34995
3.87669	1.47035		4.11926			4.78325	1.62128		2.9597	2.43982			4.12284		2.52253	4.2798		0.657173			4.55872
1.95013	4.13756		2.93806	5.78113			4.73412	5.01568	4.58838				1.84229		1.22662	1.4842		0.945396			6.00748
2.55088				5.98219		2.10378		3.01707	2.97003	2.03384						4.0254		1.24293				1.42235
3.23263	1.50085		2.7933	3.02545		3.92422	5.68745	3.29469	1.47192	2.24055			4.04913		1.36046	3.73816		2.15141			1.93986	2.3914
1.86649	2.19982		6.37703	6.7105		1.49896	2.70082	2.38209	3.79081				2.95848		1.45256			2.21698			2.44135	1.74591
2.90648	3.05443		2.22704	2.95502		2.45469	2.67408	1.68226	1.39318				2.55582		2.08231	2.14805		2.46684			2.3667	3.60738
	1.82503		2.53219	3.8543		4.07028	2.58498	2.56916	1.44743	2.18859			2.71021		1.48614	4.24158		4.09728			2.2148	1.96471
2.59147	3.01702		5.01046			1.10256	1.68026		2.65084	1.79279			1.30382		1.89331	2.89294		1.17849			1.71587	1.1034
4.68358	3.43051		9.71727			1.29108	4.90317	5.63831	3.02084	1.82677			1.40555		5.65261	2.13914		2.81387			1.63496	1.66401
2.72598	3.81557		6.87407	7.89769			3.08576	1.77909		1.86343			2.36706		1.80381	2.09387		3.79757			2.36508	1.44888
5.20364	1.34474		2.4712	5.86409		1.63442	1.76876	4.50711	2.8267	1.92752			1.97973		1.46439	1.44311		0.727877			1.5976	1.37017
3.10567			4.3584	2.45412		2.12795	4.45314	5.80088	1.61275	1.58735			4.61527		1.56173	1.94752					1.88844	2.32621
4.42796	8.88953		4.51663	8.51597			1.24304		3.65961				6.30667		1.49026	4.4169		2.2889			3.66945	4.35396
3.11124	1.49625		4.24248	11.5138		2.90875	1.82885	2.45174	2.53922	2.48912			3.31837		1.25887	2.18859		0.693611			1.6625	2.78196
1.20426	1.59473		3.07623	3.78732		3.93727	5.80876	3.07891	2.55014	4.41073			3.6133		2.137	2.75414		1.47151			5.57939	4.12641
3.27135	6.57268		6.28161	6.47726		1.89346	6.0639	1.55099	1.83184	2.39122			2.13122		4.22828	1.95659		1.60344			1.99216	3.66633
3.51072			4.49561	3.07214		0.807082	2.66257	2.59528	3.66782	1.81474			3.71249		1.79672	2.36732		1.70932			2.20666
1.57433						1.53368	3.33968	2.14798	2.11551				2.4341		1.86852			1.60645			1.77542	2.01305
2.13531	5.24955		3.74657			0.91362	3.91067	2.40928	2.94033	4.5498			1.59332		3.38792			1.8698			3.14096	3.7506
	1.58603		3.6096			0.94606	1.4269	2.55032	1.69729	6.5841			3.91795			2.18822		0.843445			1.1631	1.59724
5.71753	3.9664		4.71232			1.27042	2.82409		2.10573	1.38548			5.16409		1.64791	1.85695					1.81638	2.37692
2.15005	1.55334		8.10594			2.00045		3.98696	2.35951	2.11652			6.92361		4.01962	2.15398		0.679989			2.72724	1.98345
2.68257	3.03882		8.88648			1.45429			1.96195	5.28794			1.73689		2.58554	3.12783		0.557972			5.98932	3.69973
2.05427	2.83931		3.077				3.15439	1.5551	3.93426	4.12542			2.19975		1.88563			4.04902			4.63094	2.41716
2.08066	1.10711		2.77543			1.53995	4.06337	1.60696	1.83906	1.15102			1.87635		3.94395	1.02958		1.45502			1.54514	2.44422
2.72338	1.40524		4.45209			2.16864	1.46516	5.08683		1.96144			2.51933		1.54686			0.919369			3.75484	2.05494
1.88334	1.97664		4.1163			1.95476	5.85986	1.49428	2.0161	1.46308			2.68353		2.18653	2.53384					1.33089	1.43384
3.44046	2.1579		9.93859			1.30731	1.87478	1.30185	2.54951	2.7711			3.0527		1.27515	1.37581		0.686942				1.94553
1.95804	1.51846		6.03043			0.81489	3.48792		1.41243	2.50751			2.51462		2.13694	1.87428		1.179			4.66088	4.68978
2.60675	8.42925		10.8305			1.6444	1.51918	1.16163	2.11044	2.97007			2.55744		1.16167	2.43945		0.657387			1.15317	1.94583
	8.56367		3.36076			1.16864	6.64917	2.71864	5.71814	3.79355			2.45022		2.34152	2.15948		4.23275			2.00235	1.96999
1.92901	2.97453		4.06845			0.860691	1.43386	2.43659	3.38567	7.03114			3.42194			3.65426		0.619781			2.72037	2.09213
2.82504	5.41807		2.72269				3.06808	1.84585		4.71463			1.69572		1.42177	4.2443		0.990589			2.38791	1.32909
	2.21531		2.34827			2.57011	5.59389	1.60072	1.91838	1.68163			7.19534		2.34894			1.59108			6.03705	1.56443
7.16602	2.10196		3.87975			4.95464	1.8833	1.31487	3.71168	2.48836			2.03512		1.41213	1.77547		1.38282				2.56203
	1.7515					4.78661	1.96755			1.69537			2.17255			2.27859					3.58182
6.19397	1.95154		3.03999			0.964424		5.06502	3.72137	1.94711			3.08298		5.23659	2.08487					1.72646	1.19705
6.88921	6.7727		3.26922			1.40533	1.24242	1.66137	1.74888	3.84114						4.99222		0.572647			1.51991	1.66968
4.52122	1.96367		7.0088			1.28464	2.57495	2.51292	3.54581	6.49281			2.27934		2.1195	2.23009		1.10182			4.95342	2.14573
7.12321	2.04321		7.41232				2.67895	1.82911	4.90085				1.91824		1.70782	2.25151		1.09588			4.55037	2.51862
	2.53368		7.48273			0.61454	4.9671	3.40975	1.29994	3.23499			5.77364		2.84035	2.05724					4.71534	5.71773
3.42963	1.84554		4.27778			3.02152	2.04861		2.67682	3.5697			3.66563		1.2366	1.58871						1.2367
2.17624	1.56893		5.05913			1.42954	1.75422		4.13475	5.28181			2.84679		1.43251							1.41875
2.83058	3.87002					2.71546	2.24166	2.511	2.38322	4.01279			3.32271		4.61619						2.19281	1.6881
1.77654	1.27296		8.52538			3.74371	2.02704		1.39601	2.9702					1.18067	3.48864					3.76059	5.12063
1.41475	1.22376		3.55953			3.75912	2.09785		3.15273	1.54974			1.54284		3.58069	1.78492					3.94956	1.908
2.67932			3.12831				2.45572	2.67578	2.09473	3.23626			3.66478		2.15165	1.91482					2.07166	4.63726
3.66862	1.4173		2.33748			0.964813	1.75216		2.86168	4.76853			2.87395		4.76791	3.36658					2.75793	2.91954
2.83907	3.37319		7.0172			0.824928	1.8653		2.59358	1.35764			1.6349			3.76683					4.17544	1.85995
2.07518	4.56122		7.79213			1.9227			2.38449	3.83822					1.80724						4.89849	1.46113
2.27271	7.98221		7.72247			2.41795	1.38797		4.23972	3.17943			2.53694		3.88768	1.70817					1.37116	1.75584
2.10835	3.2213		2.91767						1.63025	3.33702			2.024		3.36743	1.39327					4.04694
2.34015	2.12152		7.07663			0.656548	3.54887		3.33788				1.49381		2.31652	3.35294						1.92834
2.10044	2.29062		4.58472			2.28999	2.38025		3.75317	2.13429			1.57523		2.26091							1.82144
2.87932	4.85887		2.49706			0.816872	3.24339		2.42841				2.90344		1.94763	2.51099					3.40177	5.2217
1.63021	4.4198		5.66679			1.55468	3.27577		3.37195	1.73746			3.23675		1.77455	2.06843					2.17334	5.61943
2.36613	2.38309		5.40154			1.59699	2.94072			4.19991			2.28381		1.26676	3.9486					1.83063	1.68331
3.03654	2.14535		3.54975			0.837448	1.66424		2.01365	4.11092			2.05974		3.00538	1.88635					1.65514	2.40276
1.61893	4.09081		6.09824			1.35675	2.63515		3.12929	1.39973			2.70427		1.41978	5.80337					2.37846	2.18302
1.45724	1.56088		2.9738			0.836565	2.01566		2.17109	1.71644			4.03701		1.7123	1.4134						2.28939
3.72267	6.56566		4.87399			2.93571	2.46459		2.42196	5.15791			3.29106		2.71184	1.49555						2.64839
3.30813	2.09336		8.03345			1.51667				3.12984			6.73726		1.72322	2.24302					1.89628
2.18781			2.73064			2.24999	3.60994		4.64384	2.52702			2.18508		1.6127	1.60109					4.11179	1.84998
5.97856	1.5285		3.78063			1.57707	2.39857		1.1448	5.20601			1.19767		1.74371	1.72008					2.63947
1.47218	2.62428		6.73613			1.38894	1.1957						1.63825		3.02743	1.57204					1.45737
2.9077	2.70044		2.8421			3.99135	4.29891		2.5976	2.47483			1.89661		1.98952	1.8597					1.82668	2.33167
2.15967	1.23562		3.90732			1.50693	3.36934		1.49382				3.03485		1.30207	2.56845					2.02119	2.98413
1.62061	1.64935		5.4565				1.20353		1.98459	3.56065			1.48095		2.98947	2.79467					3.40008	2.44291
1.71002	1.67818					1.27702	2.65012		3.79407				3.5066		2.88536	2.8129						1.28554
2.21121	2.16494		4.46635				2.08021		3.06321	3.52741					1.61436	3.94511					2.90511	2.47629
2.53769	1.25633		4.99406			2.04317	1.44889		3.24192				2.70094		5.3676	1.32257					2.11786	2.52471
7.05925	1.79398		3.23427			1.86588	4.7785		2.50288	2.32201			2.96483		2.93026						5.22789	3.87799
2.47668			6.39112			0.809784	3.73706		2.82932	1.77457					2.31464	1.39277					2.23937	1.43182
2.62928	4.39476		6.6594			2.59894	1.73813		2.31843	1.11018			2.70078		5.77244	1.38509					2.6613	1.89449
1.61511	2.66862		10.9054			1.53126	1.80387		2.71589				4.8082		2.42533						1.30186	5.12303
1.36882	1.9799		3.67395			1.27897	5.24159		5.42347	2.62671			5.06579		2.47538	2.46079						3.77408
4.22759	4.07772		3.22918			4.46799	1.77128		1.8487	5.60485						2.34642						2.53994
4.87396	1.67397		3.17969			0.575447	3.15777		3.82893	2.91697			3.94673		3.28492	2.45715					1.57086	2.63644
2.93111	2.30373		2.63391			2.78398	1.36177		1.83533	1.62453					2.25627	2.11691					1.84519	1.56499
2.10821	7.68533		2.99911			1.00527				2.82726			2.1009		1.63582	2.03355						2.18441
5.03322	2.28271		10.0157			4.39452	1.63499		2.14342				1.62421		3.92458	2.93224					2.09041	4.62277
2.68053	1.44546		5.83661			3.15651	5.28847		1.56816	2.05809			3.21245		1.86403	1.8259					4.20391	2.5477
6.14778	2.39212		5.55832				1.51546		1.51923	1.83065						2.48924						3.99049
1.84537	1.60485					1.40768			4.8567				3.47522			5.14556					2.55006	3.23997
5.08703	4.12923		5.20578			2.85239	1.99791		1.75706	3.78333			1.91114		3.62682	6.0278					1.4509	1.66689
2.53709	1.7915		2.48392			1.67793	2.72873		2.8059				1.91628		3.95002	2.28886					3.9991	1.28684
3.01025	1.73183					1.04046	2.67193		2.16714	1.96307					4.17145	1.26724					2.47847
4.77371	3.11926		4.52376			2.47233	2.84922		4.44915	4.27847			4.28022		2.25225	3.04107					2.51249	1.36283
2.70101	2.38185		2.79607			0.938576	2.60687		1.83351	1.95378			2.70473		2.14463	2.52605					5.12817	3.01189
2.47615	4.06663		4.85815			3.23614	1.45979		4.72287	4.22321			1.82915		1.72364	4.24802					5.91451	2.7667
2.3968	4.20405		6.4016			2.38268			1.66763	2.88804			1.96843		1.19303	3.27879					2.56287	2.18336
3.5381	1.65478		7.8147			3.96479	1.46008		2.543				2.47862		2.32222	1.36236					3.53026	2.55698
3.35091	1.39016		5.61119			2.09266	2.73878		2.02599	4.25201					5.06275	2.48568					1.96617	2.40911
5.68348	1.74486		5.25196			1.25784	3.09594		2.25491	3.30161			4.13157		1.74004	2.17548					5.64762	1.43212
2.09461	4.6831		3.45034			1.38422	2.28359		2.31029	1.72934			2.15421		2.55862	5.24277					3.41732	4.13349
1.60316	1.48751		2.27659				2.53183		4.0108	4.97119			1.81025		2.17161	2.14158					1.58712	1.34268
1.83266	2.9152		4.97059			1.46416	5.20642		3.17014	6.72125			4.28165		3.55223	1.87079					5.29252	1.44021
4.42995	6.44215		7.90495			1.65439	1.90427		1.83527	2.83056			1.68026		1.16631	3.82164					3.41318	1.72573
2.66874	3.64844		3.87506			1.3779	3.86671			4.91711			3.13059		3.32403	1.546					5.26558	4.91199
2.13451	4.29124		3.97882			0.714706	1.62363		1.64504	4.68368			1.67859		2.51299	1.61749					5.81435	2.77135
1.42575	1.43204		11.0436			0.948082	4.77473		1.89504				7.24247		1.88425						1.90271	1.54776
2.65972	1.56057					3.19578			2.2311	3.57022			2.21574		1.42065	3.75071					4.65222	1.50182
3.3467	9.34017		4.1017			1.20283	2.80108		1.55288				3.52352			3.61036					4.69699	3.86514
3.08681	1.66177		6.21815				1.6724		5.40786	2.03585			6.60415		3.6397	2.75152					3.24283	1.41649
1.69794	5.03092		2.39387			0.783278	1.20281		1.68203	3.26203					2.44031						2.33033
2.38383	4.43572		5.90918			1.71494			1.56892	2.31758					3.28578	2.87692
1.76584	2.81838		3.76771			3.55627	2.7403		1.97916	4.97738			3.56733			4.24763					1.86128	3.16534
2.97242	1.86559		2.96869			0.967258	2.17901		4.97199	2.59933			2.8771			2.08628					6.11124	2.26991
3.04405	1.80127		2.74063				1.35503		3.10858	2.13008			4.46453		4.47179	2.05161					4.5575	2.74094
1.64153	2.25193		3.86522			2.24394	1.70764		1.94332				2.18153		2.73011	2.15285					1.97412
1.97735	6.10342		7.5313				2.2124		2.71671	1.51391			2.73973		2.78632	3.30701					3.09001
4.07583	1.73007		3.81547			0.944347	2.99562		2.43939	1.49271			4.36658		1.99719						1.52845	2.8726
4.5975	3.89466		4.48162			2.33252	1.59115		2.54559	2.84196											1.94493	5.94686
	2.94334		6.78458			2.09355	2.31729		1.88636	4.25013					2.33566	1.96267					1.33504	1.49411
5.08453	2.19277		2.16101			0.677755	2.27499		1.4164	2.26337					2.48614	2.67214						3.07244
2.19354	6.11715		2.48536			1.88873	2.33965		2.26884	3.9205			6.17795		3.00805	1.66782					2.03978	1.5874
3.3294	2.4604		2.82651			0.711103	1.83937		2.66795	1.98527			1.54254			1.37969					1.46186
2.87545	3.01604		3.99763			1.3025	3.17589		2.29652	1.44666											2.618
2.38631	5.09844		5.86157			1.25576	5.82578		3.10504	5.20298			6.09829		1.86181	3.61941					3.47932	1.20797
1.97128	4.282		6.43126			1.40779	4.88248		1.8935				4.51724		1.84019	1.50805					4.06046	4.80402
2.96849	1.35731		3.46227				2.4406						5.68843		1.87685	1.61072					5.79111	1.24517
	2.27297		6.90476			2.63617	1.28769		1.95375	1.41802					1.58095	2.63633					1.93938	1.67137
1.41491	5.72353					1.39067	1.50317		1.40261	1.47232			2.2487		1.22638	1.66921					1.86319	2.21261
3.00336	2.61314					0.732876	1.32596		2.03232	5.82304					2.37826						5.11737	2.97476
2.5446	1.4203		2.86108			1.96894	3.11821		1.95488	1.70103					1.05223	6.1155					2.82782	2.61648
2.93495	2.50613		8.34367			2.12376	2.3896		1.87703	2.07307					1.49561	3.06668					5.6332	3.65005
1.80161	1.74779		3.15965				2.38158		5.06604	1.87588					1.62192	3.03768					2.48715
1.84024	1.97017					1.88577	1.32912		1.82567	2.6077					3.69517	1.54891					4.09092
1.56269	1.69302		3.28825			2.04161	4.15937		2.21135	5.26925					4.73468	4.42146					2.62205	1.55547
1.44467	3.28697		2.25964			1.31525	1.8791		2.9845	5.02808					1.25611	1.6413					6.11252	2.06989
	1.79077		6.73386			1.67802	3.80485		3.53518	2.42743					2.30666	2.58623					1.74044	2.71459
3.62128			2.90838			2.0685	1.40055			6.85715					5.0659	4.38803					1.31294	4.5134
1.97231	1.67007		4.65836			2.06346	2.21071		3.50047	2.39458					1.80027	2.28715					1.24927	1.63627
2.8419	2.23392		8.69779			3.58795	1.53663			2.52245					3.50026	1.27632					2.8406	2.0524
4.61004	3.86296		4.21407			1.1252	1.51667		4.00641	2.18256					1.5775	1.63127					1.41515	1.6484
1.44807						0.799244	1.89879		1.7064	2.4573					2.95787	5.95238					3.52175	1.97755
4.56854	2.33337		4.6246			0.770271			4.53534	1.8801					2.27964	2.22079						3.2976
2.45617	1.27367		4.68929			1.9789	2.54197		3.81078	1.72469					3.92515	2.23862					1.46735	4.72102
2.20176	9.13972		5.45988			1.48755	1.23271		1.90019	2.26948					5.35065	1.4398					3.08564	1.56134
2.4124	4.10004		5.87669			1.06663	4.30448		1.78183	4.56296					3.18039						2.50892
3.04092	3.99084		8.94371			3.81704	1.60162		3.6886	2.02512					1.77597	2.86907					1.85734	1.77984
3.21985	3.72		3.18829			2.58119	2.87242		3.43144						2.26656	1.75636					2.95551	3.06197
1.21147			7.52274			2.49686			1.7584	2.31353					5.02108	3.40138					4.9259	1.63919
2.98711	1.21336		2.54611			0.956936	4.72776		3.35445	2.33036					1.96241	3.59825					1.45953	3.32507
4.39495	1.24109		4.28529			1.65597			5.83538	2.52875					2.80391	3.29587					6.03475	1.87054
2.34098	6.3363		10.2502				2.03961		3.06825	1.76446					5.17184	4.59679					2.35293	2.75425
3.227	1.0834					2.61495	1.98283			2.50015					1.80361	3.54189					5.59208	4.34393
2.6874	1.96064		6.30266			0.966717	2.86982		1.72775	2.76999					1.24741	5.45461					2.34856	4.0932
4.08272	2.2644					4.31631	2.02441		2.20818	3.84583					1.49919	1.79108					4.73735	5.88763
3.40225	4.60551		3.40365			0.897535			5.14436	2.10275					1.63701						5.29555	2.02848
2.33763	4.87058		4.51448			1.80673	4.00484		2.34006	1.4928						1.82011					1.43434	1.73625
2.18041	2.17942					1.47273	2.08223		3.1923	2.1315					1.46162							2.33344
2.18254	1.85586		3.47586				1.52886		2.33891	4.31053					4.65755	1.59375
3.53373	6.84079		3.00817				5.19323			3.6654					4.414	2.81537					2.71951	2.80724
1.94195	5.57052		3.02047			2.75766	1.27223		1.95055	2.22556					2.26558	1.29524					1.73147	2.4669
	2.66653		5.87231			0.725072	2.78498		2.18178	3.61195					2.3447	1.71264						2.16827
4.02627	4.32473		4.64994			1.93452	3.04585		2.8174	5.84521					5.56155	5.99805					3.86136	1.95149
3.41942	1.85967					3.84999	2.10336		3.50434	2.6196					2.21458	2.13867					2.21147	3.39621
2.23421	8.59262		5.97206			0.525328			1.74549	2.35883					2.06334	1.66558					2.64254	5.19537
2.36663	1.54473		5.54248			2.34966	2.28094		2.33185	2.49576					3.74142	3.16035					3.21374	1.97493
1.61516	2.69883		3.19267				2.09693		1.3565	4.22264					2.20966	1.81404					1.84763	1.78156
1.86232	1.87151					4.65105	1.93551		3.49296							2.52528					1.09051
2.50234	7.58859		3.11871			1.6357	2.15703		2.01016	5.81335					1.50467	2.30248					5.11741	1.70263
1.92871	1.76982		4.82157			2.45778	3.07693		2.31734	1.78581						2.95587					2.51325	1.17009
2.06495	1.41004					1.77788	2.49469			3.67304					1.40614	5.99559					2.23903	4.28049
5.26853	4.86201		5.65842			0.714703	1.89117		3.5831	1.51197					1.37649						3.75658	2.25204
2.54733						2.09575	1.36675		2.129	2.23267					2.00211	2.78765					2.44733	1.65093
2.39763	8.44644		5.421			2.33164	4.48841			1.48228					4.4314	2.0783
1.99293	7.88246		6.15847			2.07014	4.70238		3.2873						2.07535	2.11274					1.64013	2.74212
4.84611	4.3047		9.05118			0.772774	4.48796		1.50283	2.65814					3.2347	1.89109					2.98033	4.0754
1.73397	2.40971		9.25684			1.2374	1.73038		2.3647	2.0952						1.32841					3.19949	3.99039
2.91367	1.81771		3.17908			2.36958	2.284		3.76346						2.17966	3.33587					5.42738
1.60316	3.72729					0.996021	4.38005		4.40388	2.23371					2.1405						3.80259	1.68684
4.09741			2.39976			0.725641	2.32693		1.67861	1.42799					1.5545							2.03417
2.24283	2.39624		2.91038			0.659367	2.08692		2.64263	4.47523						2.77224						2.14896
	1.87708		3.74533			2.06844	2.77979		1.98518	3.21656					2.35497	3.52402						3.564
4.39044	1.62516		5.26349			1.75338	1.30952		2.74201	4.29893					4.94695	2.71133						4.03653
2.12389	3.43572		2.82417			3.65902	3.02314		3.69664	5.94117					5.09218	1.94609
2.09671	2.86589		4.06233			0.94968			5.24215						1.78551	1.7232						2.17699
1.87496	1.54671		4.88254			4.39497			1.82687	2.63725					2.41375							5.32561
2.00165	2.39686		2.61176			1.58126	4.75224		1.72062	3.16634					2.04662	2.13803						1.73504
5.40883	4.57852		3.0342			1.26766	2.33085		2.55521	3.91234					1.93756	1.92301						4.48566
5.33522	1.0543		7.37787				4.07658		4.36208	2.42365					1.57283	2.18174						3.30373
1.56178	3.7897		6.96728				1.31566		1.85198						1.96752	1.65755
2.2005	3.20889		2.68665						1.5425	2.50743					3.96212	2.74608						2.47138
2.78101	1.97297		5.55398							2.43199					4.7931	3.65845						1.52622
4.51328	3.89576						2.79207		2.10571	6.64611					3.02512							3.45692
2.03895	1.4289		2.91586				3.1115		4.79783	5.27201					3.39973	4.58619						2.59375
1.7704	2.83119		4.558				3.20423		3.82024	1.64033					1.86069	2.66184						3.72817
1.76852	8.77617						6.18457		2.19103	6.67966					1.70692	2.02269						5.2889
3.17636	2.43935		3.17275						1.57859	1.99762						2.46574				1.57859		4.47506
1.85165	8.10672		3.32613						3.64793	4.6873					1.45354	2.43207				3.64793		3.40033
2.05287	4.38783		3.03365						4.51317	4.09601					1.58192					4.51317		2.49802
5.73561			2.71127												4.46959	2.10033						2.43919
4.06109			3.94036						3.099						1.80363	2.41504				3.099		2.46132
3.00464			8.07817						2.62849	3.77625					1.17001	2.41893				2.62849		1.1025
5.43615	3.49553		2.26533						1.613	2.4737					2.98156					1.613		2.84884
1.42814			7.86133							3.42238					4.50395	1.12306						1.35808
3.93819	2.05517		10.9809						1.59585	2.37697					4.11471	4.35267				1.59585		1.74627
1.59523	3.39071		4.50221						4.52135	2.82909					1.6647					4.52135		5.65189
4.85786	1.64559		4.3497						3.32675	5.61512					2.25252	4.02528				3.32675		1.27842
4.55168	3.71454		4.92043						2.21593	6.48371					4.33801					2.21593		1.61037
5.54266	6.46906		10.114						1.78726						1.85851					1.78726		3.20793
2.11338	2.24478		2.55898							4.729					1.25733	2.73357						1.51484
1.94654	5.32207		3.02574						3.7001	1.29852					2.1833	1.78378				3.7001
2.11622	4.42739		3.65004						2.12415						2.85605	1.43809				2.12415		1.66701
2.44875			10.9924							2.68371					2.52378							3.00128
3.55942	3.03688		2.72244						2.87589	6.58443					2.16993					2.87589		2.22884
2.70641	2.80355		7.63317						2.79483	2.53502					4.85842					2.79483		2.19518
1.57751	2.69761		2.54426						2.04352											2.04352		1.17285
1.53801	1.69144								1.70991						2.21371					1.70991		1.44032
2.03445	2.31469		4.23661						2.47369						3.94597					2.47369		2.74489
1.50043	3.04578		2.55846						2.67318						2.16373					2.67318		1.85716
3.50751	5.0099		7.11277						1.48977						2.01006					1.48977		2.55158
3.12373	3.80198		6.48914						1.77724											1.77724		5.7578
3.22066	1.89034		7.60087						2.09146						2.08441					2.09146		4.75027
6.16229	1.96929		3.52658						2.3411						1.41788					2.3411		1.82779
1.32354	3.32073		3.23177												3.52475
4.92203	2.75041		8.56401												1.94309							2.38723
2.333	2.48315		2.5328						2.75045											2.75045
3.28518	2.72748		3.12452												2.22689							2.38503
3.72559	4.792		3.41894						5.96046						4.11992					5.96046
4.01408	2.51215		2.32148						2.46189						3.93249					2.46189		1.78001
3.63504	2.44363		3.52688						3.12094						3.07656					3.12094
2.24444	1.55595		3.84574						2.15411						1.58091					2.15411		2.10303
1.8424	3.41653		3.49311						2.42322											2.42322		3.9053
5.74797	7.26422		3.80357						1.78207						2.2678					1.78207		1.85182
1.48357	1.94801		4.9055												2.09278					6.74277
2.07038	3.06121		2.36404						2.38911						2.43633					2.38911		2.53271
1.80658	5.16878		3.96311						3.30578						1.60699					3.30578		1.45247
2.00057	4.06845		4.34006																	6.69506		2.25551
1.73613	3.30579		9.2107						2.01817						2.64463					2.01817		3.21402
6.63022	1.70524		8.05217						2.1457						1.17153					2.1457		1.76849
2.83326	1.96042		2.4447						1.70635						4.3088					1.70635		2.96125
3.69763			7.32124						1.42903						2.55179					1.42903		5.15406
1.27398	2.79809		3.27698						5.84331											5.84331		4.56184
1.41544	3.06831								1.71957						2.32013					1.71957
2.73695			5.49028						2.10654						3.95105					2.10654		3.05752
3.9413	5.37855		6.93422						1.60658						1.53556					1.60658		1.29879
4.40089	7.69303		3.09488						1.99609						2.35401					1.99609		2.33248
3.39072	1.34033		3.12389						2.09309						2.00427					2.09309
1.81308	4.75454		3.13659						0.97542						2.69699					0.97542
2.04463	2.84991		3.25344						1.34432						1.96184					1.34432
	1.62047		3.20431						3.41771						1.95068					3.41771		1.18826
1.62017	2.68727								3.67016						1.75689					3.67016		1.97498
5.93991	2.16807		3.38919												5.38172					6.62867		2.82292
1.80275	2.28412		2.59485						2.01164											2.01164		1.56833
5.7281	1.94714		4.32523						4.35488						2.61481					4.35488		3.52431
6.56045	1.5065		5.25372						1.9538											1.9538
1.15061	2.18423		2.75383						2.44947						1.1369					2.44947		1.95524
3.66154	1.3289		2.7568						1.47675											1.47675		2.62324
5.53329	1.95116		4.42005						2.47971											2.47971		1.84723
2.88568	1.19921								2.09639						1.86195					2.09639		1.42558
3.01665			10.4758												1.31893							1.84143
5.48396	2.34374		3.9009						1.25524						3.3123					1.25524		1.66273
2.22108									3.08445						1.3613					3.08445		1.2938
1.79641	7.21992														1.90506							2.88665
1.5464	2.62607								2.7119											2.7119		2.17313
2.04037	3.36755								1.53609											1.53609		1.17291
1.24654	1.44573								1.32573											1.32573		4.91338
3.88688	2.0647								1.46573											1.46573		1.11816
1.62894	1.16433																			6.06198		3.56459
2.41725	1.27673								3.7539											3.7539		1.81235
2.746	7.40211								1.25923											1.25923
1.28424									2.79109											2.79109		2.52715
2.69579	4.44791								1.63704											1.63704		1.65953
3.86983	1.14171								3.84332											3.84332		3.82857
1.94323	7.58296								2.77205											2.77205		2.45879
2.10123									1.83358											1.83358		1.37099
1.77566	2.55415								3.38267											3.38267		3.43521
2.83904									3.05139											3.05139		1.54621
2.01731	1.51529								5.71247											5.71247		2.30024
3.25116	1.49344								1.91695											1.91695		1.79295
5.1958	1.30703								3.19583											3.19583		4.75215
2.37084	2.00208								4.58607											4.58607
3.9889	1.92098								2.27191											2.27191		2.40553
1.90707	3.66624																					2.19252
2.34661	2.71432																					2.93963
	1.47135								5.41281											5.41281		2.00816
3.32906	3.14002								3.05905											3.05905		4.50249
6.92568	1.32543								1.98882											1.98882		1.65634
2.57642	2.63168								2.50389											2.50389		3.40507
2.79613	1.24638								1.16286											1.16286
1.902	1.34395																					4.49924
3.64825	1.60825								2.15958											2.15958		1.46459
1.80261	5.46835								3.6661											3.6661		2.46729
3.36765	2.08794								5.18805											5.18805		1.13244
1.488									1.21491											1.21491		5.00888
2.31377																						1.87821
1.50613									1.7278											1.7278		4.80406
3.9831									2.00239											2.00239		1.5704
3.07574									2.44332											2.44332		3.04425
1.43969									1.9121											1.9121		3.75073
6.82669									2.31798											2.31798
1.42171																				6.25954
2.53372									3.86812											3.86812
5.72909									2.01616											2.01616
5.05634									4.16451											4.16451
2.48627									1.66274											1.66274
7.23271									1.34679											1.34679
5.35263									1.63232											1.63232
1.69045									1.52939											1.52939
									2.13932											2.13932
1.49257									2.48667											2.48667
3.18921									1.6515											1.6515
3.08963									3.60445											3.60445
3.50884									1.87583											1.87583
1.51662									1.63214											1.63214
2.30497									3.66758											3.66758
4.0215									2.79798											2.79798
1.83911									3.58874											3.58874
2.39625									4.20612											4.20612
7.14815									3.68097											3.68097
2.73214									1.67008											1.67008
4.5089									4.14178											4.14178
2.63141									1.15646											1.15646
3.7095									1.60716											1.60716
2.49945									3.23033											3.23033
1.92516									3.2522											3.2522
1.39463									1.61644											1.61644
2.44639									2.02282											2.02282
4.23882									1.79329											1.79329
2.96607									2.01768											2.01768
5.26236									1.69911											1.69911
2.77622									1.49264											1.49264
3.44213									3.38223											3.38223
1.80054									1.66651											1.66651
									2.07027											2.07027
1.9542									1.87201											1.87201
2.95284									2.46191											2.46191
1.53848									2.41289											2.41289
3.51164									1.8203											1.8203
6.06227									2.31514											2.31514
1.33195									1.45898											1.45898
3.49136									3.30808											3.30808
2.57805									1.87753											1.87753
3.90375									1.7045											1.7045
2.59402									5.02805											5.02805
2.90498									2.08886											2.08886
2.07208									2.63582											2.63582
2.62331									3.0083											3.0083
2.36087									1.51253											1.51253
3.1032									1.48954											1.48954
3.7211									2.0034											2.0034
2.39806									4.95852											4.95852
2.99383
									2.19018											2.19018
1.22359									3.53216											3.53216
4.7711									2.97595											2.97595
2.97418									1.70704											1.70704
									1.54502											1.54502
3.17663									1.44546											1.44546
1.69716
3.23283									2.49177											2.49177
4.13787									2.31805											2.31805
1.57214									1.48842											1.48842
1.83262									2.15162											2.15162
1.64476									3.62898											3.62898
3.54679
1.54859									2.01341											2.01341
4.23053									3.41188											3.41188
1.91868									1.48764											1.48764
6.80308									5.05501											5.05501
1.37967									1.20823											1.20823
2.10293									2.82479											2.82479
2.15945									1.75527											1.75527
3.78416									3.33649											3.33649
3.99822									4.26453											4.26453
6.17013									4.49286											4.49286
1.81338									1.71258											1.71258
5.52235									1.70889											1.70889
2.34691									2.27484											2.27484
2.63483									3.73033											3.73033
4.01869									1.56695											1.56695
1.42268									2.22951											2.22951
2.00816									2.81905											2.81905
3.53139									1.51984											1.51984
1.95018									4.89847											4.89847
1.28795									2.4458											2.4458
4.1163									1.50182											1.50182
1.99234									2.60408											2.60408
									4.2907											4.2907
6.76091									2.05752											2.05752
2.42945									2.00354											2.00354
2.56086									1.97988											1.97988
2.68933									2.25613											2.25613
2.44597									1.83906											1.83906
3.97533									2.43954											2.43954
3.85723									1.66381											1.66381
1.59378									1.68514											1.68514
6.60978									2.35275											2.35275
1.66373									1.57566											1.57566
3.35602									1.46723											1.46723
2.05585									3.65862											3.65862
2.82634									1.10963											1.10963
1.43122									1.91719											1.91719
2.60365
2.99609									2.50776											2.50776
4.32413									1.80935											1.80935
2.48088									2.31107											2.31107
4.81961									3.02674											3.02674
4.73104									2.02823											2.02823
2.91646
5.90641									2.71848											2.71848
3.62463									1.83691											1.83691
									2.11148											2.11148
1.7905									2.38605											2.38605
4.40379									1.61238											1.61238
3.57068									2.16502											2.16502
4.50207									2.397											2.397
1.48231									1.97846											1.97846
5.21719									2.73985											2.73985
3.40641									1.50507											1.50507
1.72573									2.07475											2.07475
2.84904									2.0974											2.0974
									4.12919											4.12919
3.59424									2.47726											2.47726
									1.4563											1.4563
2.78098									1.98078											1.98078
3.72149									1.36339											1.36339
2.01879									1.68593											1.68593
1.84245									1.99687											1.99687
1.48719									3.52575											3.52575
5.69209									2.5386											2.5386
									1.99082											1.99082
2.53592									3.40638											3.40638
2.0599									5.23297											5.23297
5.32224									4.59152											4.59152
1.68447																				6.19848
2.16734									3.7661											3.7661
3.43151									2.68079											2.68079
1.91538									5.39622											5.39622
1.30843									1.43236											1.43236
2.62598									2.46879											2.46879
3.12521									3.01836											3.01836
3.50156									4.38938											4.38938
2.44673									1.76431											1.76431
2.17168
1.36807
2.9423
2.21771
4.7501
3.93841
2.26618
6.5954
1.9845
3.38241
2.8506
1.44593
3.06516
3.63036
1.85454
1.82867
4.25459
2.70188
6.06314
3.89708
2.23677
7.24141
1.86015
6.21589
2.75767
1.39924
4.598
2.54389
5.03012
2.18647
3.29496
1.49573
6.35397
6.46188
2.41813
1.91448
4.47511
1.94054
4.16492
4.82325
6.2644
3.12433
6.6331
1.63266
3.21212
2.16006
1.4689
2.14758
7.03648
4.93674
4.81925
3.08618
2.42857
2.35823
4.96588
2.69775
3.92039
1.86009
1.95514
4.17187
2.10027
1.32023
2.76732
3.73449
1.90427
2.0743
6.47903
1.7526
4.8393
3.86264
4.95313
1.34843
6.8586
2.88055
1.20033
2.28427
2.21345
1.66091
1.89574
5.80779
2.58834
2.33784
2.63548
4.96588
3.88211
2.41475
3.01442
4.42741
1.69758
3.41816
1.43957
1.86037
6.59826
2.06003
1.60393
2.31071
1.9263
4.71978
2.28748
1.82901
4.6556
4.86491
3.12848
6.25468
2.00693
1.75986
2.38708
3.57617
5.67618
1.43116
1.55405
3.99719
1.91234
1.59045
2.96899

## Sheet: Figure 3C
Veh	Tg	HF	3610-0min	0357-0min		Veh-5min	Tg-5min	HF-5min	3610-5min	0357-5min		Veh-10min	Tg-10min	HF-10min	3610-10min	0357-10min		Veh-15min	Tg-15min	HF-15min	3610-15min	0357-15min
2.35764	2.19188	1.79232
2.98437	1.99731	1.35758				0.783433	1.53933						0.985205	0.708162				0.334731	1.96923	0.941234
2.65839	2.71445		2.58437	1.43081			1.2519	2.00993	1.06284	1.65066		1.09414	0.95432	0.945562	0.678735	2.08076		0.779545	1.49573	1.01257	1.02039	0.89019
	3.81006	2.39441	3.06264	1.72233		0.791866	0.958553	1.00322	3.08074	0.869653		1.29432			1.3628	1.29841			1.16379	2.28484	0.894672	0.745117
	1.92779	3.04711	3.06344	4.43985		0.516365	1.48373	2.65587	2.01554	1.13036		0.753611	2.0708	1.03672	0.981896	1.7965		1.2263	1.03312	3.88089	1.58818	0.675115
0.963941	1.78439	1.77182	2.38245	4.61677		1.17331	0.94118	2.1446	1.95911	0.932236		0.625086	1.32915	0.994478	1.64079	1.51635			0.756	2.51813	1.39831	0.881535
1.34443	2.39256	1.11388	1.60548	2.00389		1.46264	2.37656	1.13764	1.03616	2.8535		1.7024	1.0701	1.04352	1.30643			0.724608	0.842207	1.00175	0.980458	0.613054
0.799507	2.56876	3.57742	2.48938	2.03206		0.728818	2.2407		1.03189	1.19719		0.756613		3.11201	1.14955	0.588285		0.352086	0.969054	3.22456	0.782028	0.763427
2.79329	1.5992	2.7498	2.93491	1.7015		0.606281	1.08898	1.07877	2.55147	1.19427		0.363894	1.80412		0.958155	1.00714		0.486409	0.516801	4.02877	1.02004	1.61019
1.1352	1.88153	2.27391	2.56162	1.53021		1.05878	2.84628	0.819609	0.871178	1.99399		1.58105	1.98379	0.978379	2.09162	1.33047		1.81885		1.09347		1.27706
0.795716	4.53699	1.41215	2.08249	1.44853		0.595405	1.01629	1.08093	1.52182	1.30795		0.524855	1.18073	0.883373	1.19535	0.855292		0.507261	0.970894	2.64124	0.986234	1.15002
1.7757	1.56311	1.40796	2.10095	2.18038		0.970907	0.857967	1.00873	2.18478	1.22477		0.919768	0.938118	0.995521	1.75197	1.32643		0.948907	3.34632	1.31745	1.83391
2.63234	2.39222	1.91628	1.69338	1.72388		0.342168	0.998651	1.3517	1.44406	3.35196		1.06267	1.79431	0.734643	1.02162	1.34614		1.14647	1.89002	1.94129	1.30824	1.46148
1.55524	1.49957	1.43919	2.52733	1.30666		0.755278	1.93392	1.59572	1.12435			0.39864			1.11314	0.951371		0.4197	0.917137	1.31134	0.835197	2.89708
1.38479	1.49673	2.15046	2.11367	1.74163		0.467292	1.42717	2.49859	1.59222	1.29056		1.52209	1.67703	1.5309	2.77303	2.27328		0.414317	1.32983	4.70637	1.04636	0.643798
1.72864	1.26033			3.23187		0.696976	1.96746	2.61162	1.02925	1.16939			1.27625		0.598237	1.98407		0.61947	1.1341	3.27879		0.861275
2.1063	2.3315	2.11405	6.46567	2.22202		1.84048	2.08331	1.28577	1.16671	0.907568		1.0183	1.57806	2.20676	1.42614	0.768419		0.783457	0.739074		2.13478	1.13857
1.05583	3.45531	1.52601	4.56921	2.95201		1.42665	1.7296	1.19994		2.01063		0.489887	0.873238	1.6441	1.13705	0.808998		1.22924	0.856795	0.737568	0.625731
1.35446			3.76329	1.64007		0.866909	1.0506	1.99158	0.839636	0.787737			2.78037	1.28644		2.32136		0.587042	1.49718	0.966541	1.51962
0.834245	1.77208		1.32664	2.68852			2.02202	1.80492	1.84843	2.80153		1.77891	2.41309	1.31954	1.5258			1.11562		2.92562	2.11371	1.51007
2.7383	1.62785	1.34855	6.17727	1.15296		1.02224	1.67828		0.701875	0.762019		0.472854	1.72615	2.09109	0.670199	1.0286		0.747517	2.03124	0.744452	0.949327	1.11528
0.914564	1.90936	2.22481	1.66246	1.33789		0.762303	0.962606	1.80635		0.9094		0.703026	1.20015	1.3529		1.26378			1.06733		1.20803	1.29002
0.861663	4.32476	2.44924	1.39589	1.41235		0.682268	0.890422	0.755676	2.33115	1.19854			1.26033	3.58445		0.941116		0.474319	0.750254		1.29791	1.26793
2.08428	1.37918	1.82737	1.50939			2.11034	1.74868	2.87737	1.3604	1.33712		0.722697	1.87057	0.964695	2.44292	1.27872		0.457667	1.83499	1.7016	0.974814	2.03846
1.33199	1.29668	1.49929	2.00477	2.6152		1.50606	0.914638	0.988118	1.68456	1.29749			0.805325	2.80178	1.79797	1.52723		1.1845	2.30961		1.90517	1.03021
2.9405	2.16032	1.55868	2.0934	1.91808		0.676551	2.71054	0.918382	2.54405	0.886731		0.53689	2.49066		1.14737			0.481579	0.721707	4.54844	2.5228	1.17167
0.886308	4.46249	2.09469	3.38649	3.44361		0.492744	2.30326	1.29535	1.37109	1.39687		1.0683	1.19082	0.76642	0.957505	1.08431		0.508065	1.04538	1.54818	1.14479
2.80396	1.46754	1.94801	1.25663	4.69453		1.08086	0.923241	0.844286	0.79769	2.46988		1.80592	2.02707	1.85526		1.12565		0.416612	2.28241	1.29243	1.1071	1.72303
1.25206	1.20605	1.41946	3.72337	1.47125			2.03212	1.45955	1.95674	1.32955		0.886261	1.03581	1.09823	0.766234	1.65249		0.448519	0.951821		1.42946	1.33888
2.60519	2.4324	1.60803	1.97237	2.42763		0.445236	1.24912			1.31971		1.55571	1.0634		1.22525	0.848666		1.62759	1.70983	1.2571	0.901388	1.3856
1.02304		3.56171	2.23527	1.38529		0.548534	0.776478	1.66792	2.09564	1.91549		1.10003	0.600206	4.21856	1.02308	0.766715		0.467552	2.47566	2.02723	3.205	2.26765
0.786474	4.36864	3.30527		2.36375		1.53847		1.13841	0.910916	0.939268		1.52235	1.15899		0.896065	0.86286		0.35174	2.60815	2.04375	0.907218	0.716523
1.67436	3.93724		1.30508	1.79649		1.0733	0.928512	2.15888	2.34995	0.774554			3.10984		0.691292	2.18156		1.24588	3.8023	2.5538	1.23572	1.10774
0.894638	2.21189	4.04862	5.06496			1.82056	0.967904	2.46824	2.85787	0.847766		0.573966		1.14658	3.07219	1.56574		0.476983	1.91867	4.62686	0.552424	1.18866
2.60029		1.90665	2.0534			1.31136	1.98143	3.08941	0.97419			1.31468	0.888204	0.894896	0.658479	2.91554		0.577036	2.57425	1.6147	1.19034	0.813545
1.34795	1.87309	3.5007	5.29949			0.43831	1.04451	1.05563	0.862023	1.3118		1.33949	0.794477	0.963788		1.05971		0.71959	2.20864	1.78198	1.30773	1.28042
0.728436	1.99738		2.77189	4.03648		0.574589	1.01798	0.883778	1.06552	0.958615		1.67193	1.2945	1.00235	1.67491	1.16726		1.63478	3.47429	3.31456	2.17015	2.41336
1.19644	3.0866	1.30525	1.67762	3.1655		0.699233	3.29111	2.86927	1.7348	1.11673		1.27313	1.43894	1.82907		3.09246		0.739508	2.65344	0.926679	0.892997	1.1492
1.69483	1.76897	2.11998		1.53074		0.69063	1.69495		1.04471	0.794363		0.51418	0.919401	1.14832	1.28539			0.634529	2.34735	2.47002	1.9357	0.973093
1.28217	2.91614	2.27484	4.36369	2.27176		1.22755	1.22628	1.88892	1.21034	1.28603		0.961995	1.21398	1.04971	2.1195	1.60197		1.10996	2.42914	1.3623	1.82019	2.3156
	1.90438	2.10725	4.14828			0.726498	1.07051	2.07413	0.879407	1.85971		0.830716	1.07494	1.78932	1.47753			1.25253	1.40218	1.42565	2.47382	1.88366
2.38177	4.82879	2.98141	1.62784	1.5986		2.16124	0.669682	1.94136	1.55896	0.781195		1.32302	2.92632	0.864595	1.82085	0.841416		0.75885	2.00854	2.25837	1.72465	3.30945
1.29053	1.39094	1.34526		1.92938		0.635564	1.38608	2.31527		1.78037		1.27614	2.30282	0.983649		0.764315		0.487521	0.721045	0.682544	0.942766	0.590525
3.11141		1.95968	1.52938			0.762347	1.19945	1.07083	0.862368	1.64207		0.794939	2.32514	4.37585	1.73503	1.36933		0.871875	1.04746	2.25259	2.88685	0.975554
1.43138	2.24976		1.94743	2.19053		0.964755	1.11362	0.838356	1.22237	1.40388		0.689758	2.31572	1.44446	2.34154	0.839738		0.421926	2.90395	1.05632	1.12945	1.09692
1.16572	2.87579	1.22303	2.11663	1.27			3.67699	0.859021	2.47	2.2257		0.957364	1.24158	0.820218	1.14532	1.93683		1.22152		1.17966	1.31097	1.24218
1.14629	1.37721		2.52627	2.42249		1.46118	1.59043	0.721796	1.28877	1.91746		0.460618	3.82413	1.17172	1.35936			0.464964	1.48742	3.32636	1.50227	2.35725
2.42502	1.49016	1.65856	2.06302			1.93438	2.16621		1.27536	2.99544			2.35622	1.29603	1.24112	1.88763		0.717354	1.34277			1.09251
0.945589	4.99417	5.34452	3.04327	2.63745		0.467307	1.22419	0.798891	1.3955			1.33361	1.46451	1.0436	1.2709	1.49034		0.7427	0.931563	1.5657	1.30296	1.09284
1.06695	1.3929	2.76552	1.85653			1.19947	0.827111		0.99577	1.84916		0.506832	2.24645		0.771086			2.20461		0.904133	1.19846	1.04422
0.911665	1.96544	2.03675	1.45303	1.61424		2.00111	1.0701	0.777179	1.30575	2.63486		0.449814	1.11574	1.14102	3.00625	1.39475		0.5547	1.26967	3.90188	2.4879	2.68766
	1.54214	1.52916	1.70565	1.57074		1.88051	1.12852	1.00402	1.39304	3.12552		1.35468	2.0383	0.891555	1.29699			1.3075			1.05349	1.72903
0.9413	5.00789	6.37873	2.46992	1.47088		2.74897	2.28388	1.07957	0.978101	3.55359		1.39043	4.08826		0.931294	2.19601		0.694395	1.77382	2.21103	1.97334
1.06783	4.43907	1.63789	3.48692	2.08505			1.07188	1.11258	1.4084	0.821654		0.557722	2.9005	2.20953	2.84308	1.42323		0.725083	2.20194	2.05374	1.06935	1.86532
0.934751	3.54421	3.92284	5.27367	2.92804		2.60867	2.76515	0.983108	1.08754	1.29769		1.44644	0.726057	1.52656	2.91188	1.6124		0.872953	2.48289		1.78282
1.69316	1.27399	1.43788	2.8494	1.94774		1.59809		3.20748	1.811	1.03715		0.640945	3.8259	0.754128	2.1072	1.8164		1.3765	1.50493	2.16743	1.4289	1.74005
1.17363	2.21254		1.83546	1.69171		0.826493	1.3292	1.57586	0.743481	1.51751		0.475163	1.81881	0.759735	0.548934	1.18557		0.525227	1.87147	3.92935	1.79151	2.34668
0.750416	2.49407	1.39599		2.40851			1.23835	1.82406	2.00829	1.03865		1.19322	1.73328	1.42702	1.61547	1.85729		0.46601	3.22392	1.23768	1.01596	1.19379
1.6175	4.17121	1.09087	2.29143	1.70539		1.13859	0.869383		1.43673	1.51385		0.506334	0.733864	2.14245	1.0192	0.950182		0.760471	4.12811
0.901367		1.71267		2.47265		0.613648	0.722074		2.19699	1.07868			1.32171	1.15067	1.16982	0.654027		0.744245	1.11256	0.957037	1.70806	1.82572
0.771269	1.47884	1.43112	2.73058	2.92996		0.33068	1.04553	1.63016	0.962629			0.486817	3.27556	0.695322	1.00878	2.11879		0.612197	2.96658	0.721471	1.99334	0.867929
	1.08228		1.58609	2.47475			1.20379	0.86635	0.797745	1.7919				0.977137	1.42379	0.681458			2.21608	3.24894	1.00601	0.883795
3.06409	1.19575	2.34722				1.60739	3.17551		1.34531	1.45919		2.42455	1.69619	0.816888	1.37929	1.15271			2.31663	1.39878	1.30321	0.79558
1.36058	5.14918	1.88609	3.32062	1.8969		2.2584	2.92258	0.978826	1.6418	1.50089		0.40906	1.67512	0.791336	1.28821	2.68099		1.18405	1.0343	1.02093	1.01597	1.37735
	2.77762	3.31059	1.29431			1.31708	0.78227	1.22253	0.954678	2.39538		1.30866	2.84474	0.700351	1.57389			0.385464	0.742554	1.47493	1.8891	1.186
1.24889	1.21989	3.74289	5.02122	1.11202		0.856184	0.875705		1.41034	1.80524		0.473739	3.26444	1.22981	1.15445	2.12089		1.45698	1.5483	4.09345	1.04146	1.75394
4.07673	2.31523	1.77644		5.55133		2.38604	1.43062	1.68269	1.64003	1.32424		0.541439	0.950767	1.96975	0.952121	0.975445		1.42604	1.61346	1.34999	1.56471
1.37091	1.49693	1.42352	2.37186			1.07424	0.755361	1.10278	1.00284	1.9872		1.77108	1.37667	0.848269	1.05472	0.932218		1.35336	0.806673	1.23661	1.91235	2.19001
1.66858		4.50856	3.30254	1.17		1.3931	1.50448	1.07508	0.964846	2.49179		1.25612	1.45545	0.883432	1.08424	0.956127		1.06832	1.85522		1.03859	1.14886
1.47184	2.32901			3.89532		1.99525	0.95223	1.57834	0.88671	1.6527		1.48601	4.20545		2.99342			0.685732	1.45112		1.92876	1.4334
1.2733			1.42861	2.38316		0.84682	2.69016		0.657474	0.79244			0.982344	0.71261	1.07892	0.963375		1.13308			1.49589	1.12969
1.21898	3.03039		2.27058	4.39796		0.499625	1.05348	1.55547	1.10182			1.3031	2.88999	1.35702	1.36233	0.729542			0.993201	2.01161	2.61481	1.79881
1.17014	2.70745		4.14328			0.389924	0.934362	2.52353	3.22584	1.34244				1.48398		1.64208			3.65187	1.32439	2.39746	2.03764
1.97005			2.72324	2.312		0.431357	0.747576	0.779453	1.18029	0.621492		0.491726		0.960783	1.48089	3.1666		1.87206	1.64445	2.17793	0.77373	3.14687
1.55887	1.55676	3.6412	2.97734			1.77469	0.961643	0.618023	1.14169	3.98472		0.484261	1.2195	1.40838	2.05516	1.84114		0.424275	1.54099	2.38109	0.979604	1.10043
2.01961		1.97005	4.85598			1.08562	0.69033	2.82538	1.84799	1.19018		0.407279		0.966536	1.57143	0.699906		0.627918	1.04527	2.59225	0.740832	1.04644
2.62623	2.63097	6.39289	4.77218	5.59481		0.457835	1.46351	1.9445	2.38293	1.91436		1.24943	2.18173	1.65171	1.21896	1.045		1.13619	2.77175	2.29977	2.91736	0.939734
1.78224		3.23963	1.15229	1.73804		0.391006	0.893055	1.53114	1.72142	3.32455		0.715958	1.01313	0.810597	1.05307			0.795712	2.77799	1.74113	2.40992	1.89916
	1.9868	1.421				0.631345		0.900264	3.19164	1.59409		0.498606	0.611616	2.9499	1.11056	1.37363		0.50333	2.32865	1.72597	0.819897	0.809418
1.24458	2.12324	1.45473	4.4801			0.41856	0.951981	0.840819	2.3984	1.00428		0.403854	1.35659	1.18508	1.32519	2.12078		0.408599	1.44068	1.14203	1.05569	1.17824
1.45774	3.61466	2.8087	5.38506	3.67072		1.63351	1.11969	2.87759	1.14523	3.04719		0.394667	1.36279	0.69115	3.2006	2.91312		0.610809		1.14522		2.47233
1.96482	1.52741	1.35592	2.34566	2.12155			2.45088	1.20773	1.31209	1.58065		0.672741		0.890309	1.45021	1.10047		2.12778	1.32092	0.861863	0.667027	0.712834
0.840867	2.78064	2.44153	2.05122	1.34514		1.40873	1.1187	1.17375	0.987203	1.14739		1.75337	0.810932	0.877446	1.05741	1.39444		1.98994	2.08374	3.9533	0.880518	1.39718
	3.95762	1.48807	1.77594	1.36301		0.416153	1.21856		1.53222	3.78147		0.896155	1.31606	1.97105	0.960184	1.37871		1.69492	3.70573	2.10225	1.61723	1.00412
2.54403	1.60703	2.39897	1.38412			0.384734	1.23648	1.27957	3.10502	2.05768		0.640014		4.34617		1.55509		0.95057	1.50062	2.54798	0.992662	1.02557
1.20384	2.61461		2.80893	2.96925		0.644027	1.5421	0.702997	1.7317	1.36119			1.57405	3.37466	0.799634	1.18463				1.91421	1.63306
1.03877	3.01117	5.03108	1.98009	2.06317		1.51863	0.98881	1.04745	2.69294	1.82329		0.327763	2.02057		1.07018			1.41601	1.67119	0.618203	0.766076	0.799122
0.721447		2.44166		1.73844		1.67432			1.04417	2.00783		0.671781	1.42997	1.07424	2.29305	1.21093		0.614448	0.7813	2.06511	0.8572	1.27672
0.870766	2.883	4.14985	3.09447	2.11393		0.650214	1.87271	0.82913		1.13781		0.399526	1.22557	1.84706	1.01398	1.20622		1.24136		3.40901	0.945794	0.979732
1.02005		6.37142	2.23371	5.34723		0.509516			2.46683			0.738664	0.913442	1.8672	0.828117	0.741685		0.676245	1.83107	2.24801	0.931405	1.98366
3.52491	2.58319	4.85548	2.68956	3.01518		0.797204	1.0091	1.22158	1.3178	1.54782		1.44899	2.47067	0.904989		1.30923			0.803617	4.41532	1.29048	0.737509
1.26299	3.45044	3.27583	6.06132	2.56663		1.15314	3.52234	1.0738	1.12469	1.09948		1.07636	1.35743		1.13027	0.790532		1.06969	0.860664	1.18936	0.846151	0.786571
	2.79182	2.48043	1.65857	3.01458		0.42038	1.30134	0.851647	1.89643	1.15559		0.796164	1.86013	0.875869	1.04076	2.39627		0.705707	2.5573	2.18759	1.15228	0.887883
0.920675		2.11601	6.38618	2.47958		0.78867	0.806965	1.20478	2.02065	2.25481		1.34743	1.48849	1.77287	0.760993	1.78342			1.10505	2.55423	0.950605	1.18793
1.26235	2.64861	1.52804	3.18768				1.32691	1.559	3.13728	1.16105		1.01404	1.85375	1.6192	1.17166	2.22674		0.862875	2.56315	1.29356	0.985875	2.72313
1.18505	1.61483		2.10426	2.32468		0.645737	1.64879	2.6841	1.30905	2.03972		1.98718	2.06189	1.06339		1.28572		1.01297	1.17875		1.07106	0.848935
1.99458	2.55208	2.70332	4.6481	2.59778		0.865462		1.31445	3.01943				0.696116	0.892773	1.70685	1.20951		1.43434	0.903587		1.02801	2.26332
1.75585	3.40285	1.48063	1.68814	1.36448		0.77817	1.8029	0.849491	1.50468	1.234		1.05642	0.854776	0.789005	2.75554	1.21596		0.657414	1.43082	1.57259	0.650676	1.38603
1.23406			1.39433	3.20653		0.473078	1.25541	0.788519	1.39957	0.821451		0.700756	0.928878	0.801652		0.890618			1.11703		1.50755	1.25868
1.33939		5.39695	1.4978	3.18338		1.35877	2.82126	0.968391	0.956868			0.887046		0.739898	0.769387	1.50919		0.810895	1.11604		0.79969	3.13682
1.83413		1.48025	1.32303	1.97365		0.953151	1.16207	0.943783	1.69466	1.66929		0.54217	0.640449	1.65579	1.79432	1.28403		0.517867	1.97139	2.24218	2.04836	3.13202
2.09232	3.28808	1.50402	1.98051	3.44276		0.685411	0.720335	1.16877	2.22234	1.07061		0.463352	0.918139		0.890085	1.933			1.33183	1.35033	1.80614
1.01883	1.48601		3.38374	5.3171		0.494758		1.29552	2.52406	0.769864		1.46171	1.89454	0.779983	1.05146	0.759687					1.32301	1.08273
	1.42794	1.40634	2.97632	3.25074			1.43223		1.41595			0.406247	0.94376	1.73502	1.4533	1.90447		0.610838	0.880813	2.45932	2.49726	1.14241
1.73799	2.41982	4.26748	4.14303	1.87798		0.624948		1.75397	1.9635	1.85505		0.461825	2.11772	1.84262		1.72139			1.05285	4.11472		1.06539
1.03638			1.43849	1.42895		0.935592	2.56244	1.92561	1.63541	1.35116		1.37026	0.855355	0.756159	0.905673	0.665596		1.15105		1.30022	0.861002	2.88273
1.6292	1.23535	1.61295	2.53749	1.76282		1.16781	0.66838	2.14351	0.91022	1.00368		0.894758	1.28926	1.15794	1.24338	1.16531		0.48875	1.49666	1.03775	0.727679	0.966206
2.44771		2.80115	2.03424	4.22154		0.558079	1.88014	0.963362	2.01141			0.653318	1.0553		0.954064	0.849736		1.04278	0.677631	1.42985
1.06839	1.69116	2.06978	1.50157	2.6345		0.379542	0.705659	0.896348	2.02919	1.08592		1.18888	1.10993	2.17191	1.9493	0.741747		0.625385	1.32787	0.988607	0.715426	1.30142
1.07923	1.20922	1.37864	3.3144	6.47815		0.833739	1.33455	1.27631	2.03031	0.745825			1.75548		0.657823	0.690309		0.741917	1.34742		1.5722	1.00178
2.20487	1.7636		4.47174	3.89691		0.511734	0.853602	0.725774	1.57379	2.23013			0.845935	1.01085		1.2786		1.5689	1.35466	1.53074	3.19848	2.89797
0.925906	2.62227	1.24793	1.48302	2.86411		0.797467	1.91791	1.83362	3.38539	2.45794		1.91176		4.31139	0.819924	1.07398		1.12899	3.59731	1.64364	2.49919	0.673185
2.71773		2.75377	5.48193	2.67323		1.23263	0.80997	2.53796	1.34583			0.945215		2.95027	1.21099	3.32408		1.22568			0.692545
2.38548	2.30688	3.69996	1.43299	1.28803		1.61331	1.02321	1.65024	0.976168	1.14864		0.676026	0.922544	0.867216	0.922645	2.48991		0.746554	0.753033	0.913679	0.689111
0.815094	2.81245	1.2365	2.05226	1.45985		1.04092	0.813559	1.02069	2.32735	1.80418			3.70214	0.885566	2.68654	0.949245		1.18482		1.7032	1.82915	0.968759
0.736709	2.22446	4.86268	1.60697			0.849433	1.66375	1.18668	1.7757	1.30729		1.30405	1.69718	1.52642	1.17247	0.782166			1.24572		1.22327	0.876639
1.42781	1.29616	1.81156	4.6475	2.91592		1.30909	1.60837	1.71081	1.96753	3.90174		0.722512	2.23951	1.07417	0.922368	0.96478		1.62696	4.28844	0.957529	1.76568	0.76027
3.64559	1.8052	3.11462	3.01533	1.14678		0.86502	1.17672	0.732115	0.700053	2.11618				3.33704	1.1545	3.08149			1.31976	1.00245	0.84459
1.03625	1.64578	3.63606	1.75301	5.01122		2.54878	1.60542	0.532216	2.71709	1.22736		0.463776	0.978879	3.66631	0.96919	0.630543		0.763604		1.16584	1.30039	0.901702
3.11238	1.69827	2.16598	2.34749	3.49699		2.70977	1.73728	1.06672	1.33176	0.887146		0.7329	1.84558	1.49782	0.599067	1.9059			2.67117	3.00462	0.881008
0.852362	2.43408	2.13381	2.30392			1.67197	0.864306	0.896578	2.92015	2.61285		2.08985	0.955	1.61503	2.15005	0.915691		0.456373	1.52167		1.17895	1.19638
3.14005	1.37186	1.54679	2.31207			0.48716	1.13496	0.990808	1.49222	1.02808		1.42045		4.46213	1.16686	0.787936				1.36623	0.796337	2.6498
3.05298	4.87562	1.3428	2.09295	1.77582		2.54934	1.3749		1.34602	1.51522			0.908659		2.93445	0.870975		1.46421	0.776092	4.45676	2.36937	1.01228
2.32871		2.82773	5.74169	1.33618		0.57132		0.897999	2.1223	1.14626		0.503104		2.06773	1.17035	0.677427		0.467163	0.740988		1.09619	1.02258
1.21721	2.37895	2.30572	6.00626			0.555551		1.22189	0.874582	0.827229		0.47943	1.01148		1.38429	0.782011		0.51508	4.13004	3.1632	0.837972	1.93252
1.50207	1.5677	2.83108	2.6159	2.99213		0.508684	2.19728	0.956515	0.644098	3.03744			1.26843	1.97221	0.850736	1.19688		1.83508	0.930913	0.787914	1.40087	1.06407
0.901925	2.72015	2.42224	1.36023	2.98857		2.02232		1.40285	1.03068	1.61624			0.872791		2.0237	1.18901		2.03866	0.647238			0.720448
3.61006		1.01593	1.7788	5.97854			1.46014	0.701783	1.00939	1.24144		1.43725	1.36981	1.30209	2.56084	0.759752		0.510243	1.04891	1.05147	0.919944	1.30938
2.33488	2.58044	1.97254	3.96939	3.31557				0.907998	1.5565	1.04762		1.64127	1.61235	1.4414	0.817644	1.41028		0.508916			0.90497	1.07604
1.23062	3.05668	2.77933	1.82349	2.26041		0.49025	1.57207	0.673836	1.44175	0.532803		0.35595	1.49569	0.974469	0.774076	1.53019		0.700579	3.43839	2.55582	0.913828	1.25405
0.732321	1.15598	2.43471	2.50887	1.44458		1.08658	0.938541	1.81103	2.68774	1.39873		1.99384	2.69232	1.77958	1.76128	1.1527				0.603976	0.77663	1.58112
0.75909	3.82044	2.73174	1.0865	1.83857		0.70395	1.6682	1.22724	1.42065	0.881357		0.453431	1.83606	1.3107	1.91508	1.12453		0.921281	3.47273	1.70051		3.28461
1.36752	4.30447	3.95728	1.34497	2.74478		1.88123		1.22782	1.08373	0.803923			1.32791	1.45895	1.07391	2.30477		1.39361	3.41862		1.69345	0.945357
2.91063	2.59452	2.66556		4.31718		0.809723	1.39983	3.37397	0.906588	1.35624		0.745695	1.49046		1.80127	1.19221		0.753846	1.62585	2.52617	0.727716	1.81727
3.98014	4.96714	4.83613	2.81373	2.29712		0.661654	0.874824	1.57889	1.27648			0.643584	1.23908	2.51733	1.95534	0.753388			1.33326	0.7285	0.923276	1.05612
1.6528	1.86338	1.68176		3.08113		0.664251	3.06492	0.956946	1.55943	3.84384			0.794207		0.891109			0.735051	1.589	2.79691	1.37446	1.0612
1.22335		3.05093	2.14539	2.73635		1.21421	1.25358	1.62894	1.07785	2.05729		0.488926	1.6409		2.82995	1.25605		1.01795	3.25673		0.749706	1.73163
1.03337			3.31309	3.16335		0.541564	0.810591		1.67609	1.59666		0.922309	1.09995	1.62311	1.67587	0.985609		0.497342		1.4364	0.92328	1.32735
				2.95898		2.13808	0.642441	3.47242	2.20688	1.42556		0.391032		0.581785	3.14585	2.20349		0.732005		1.48588		0.80997
1.03149			3.23787	3.57668		0.809346	1.66638	1.43424	1.27366	1.19891		0.451309	0.919284	0.969592	1.72859	0.853745		0.654719	1.40911	1.83868	0.747838	2.77781
3.63224	2.06664		3.18764	6.02529		1.78142	1.51913		1.29148	1.11983		1.75955	1.4336	3.10152	2.14568	0.806569			1.47024	3.89436	1.58743	1.45623
3.79133	4.62557		2.96433	2.33105		1.9493	3.16961		2.1839	2.7158		1.80735	3.39155		2.15495	1.02916			1.29611		1.38186	2.65047
1.48375	2.33891		6.31015			1.5399	2.56491	0.871599	1.44989	2.54838		0.837709		0.780324	0.952237	0.934362		2.0205	1.25961			0.617413
			6.20925	2.10447		2.09199		1.59859	1.75991	0.719124		2.06444	2.45636	0.860587	2.60744	3.35521		1.40584	3.93236	1.35283	0.969991	1.62279
1.64163			1.69594	1.99483		0.455048	1.52627	0.936562	1.03662	1.52889				1.1822		1.06133		0.805353	1.04153		1.7254	1.05692
1.50325	2.06546		1.55162			1.33911		0.856423	1.32865	1.29641		0.976054	2.9321		0.941459	2.27612		0.728433	2.16354	1.68775	1.055	1.90458
0.86489	2.13742		1.15767	1.52555		2.72172	1.25151	1.18761		0.885167		0.966509		0.86421	2.63855	0.880453		0.52626		1.02449	0.788626	1.1204
1.50989			1.38487	2.35557		0.891071	1.50611		1.22516	0.699235		1.50838		0.770894	0.93796	0.89548		0.421987		2.24871	0.733056	0.741062
4.06809	1.52305		1.39318	4.83449		2.11805		2.73839	2.67915	1.27312		0.378566	1.02944					1.04071	1.29551	2.9948	1.58282	2.58947
1.26952	1.31799		5.03674	2.87838		0.821978	1.15486	1.11297	2.3436	0.880063		0.853107	1.12156	4.3604	1.27532	2.23288			1.11433	4.31033	1.58488	1.59797
2.82132	3.53123		2.21144	1.50511			1.68258	0.938801	1.0514	2.94464		0.668591			2.52008	1.33395		0.568304	1.82703	2.58453	1.30145	0.89306
2.30926	1.51228		2.82409	5.26066			0.714805	1.19624	3.21251	1.64525					1.7938			0.472315	1.20843	1.79065	1.30875
1.53751				1.1694		1.07674	1.02794	1.79194	1.27559	3.40029		1.42812	2.46289		1.23199	1.22847		1.84131	2.5836	0.918017	1.41916	1.02598
4.09494	1.44553		2.27001			1.08873	2.17174	2.55987	0.679805	2.21623			3.56238		0.888676	1.6066		0.934154	1.63988	3.52055	0.976843	1.57505
	2.2588		2.2057	2.30752		2.73054	2.27006	2.07099	1.40185	1.52432		0.970677		1.46579	1.41786	1.05205		0.39383	1.0564	0.715128		1.60988
0.740595	2.21968		2.93995	1.87316		0.510431	1.53169	0.710601		1.79985		0.494535	1.17217	0.776523		1.3967		0.55058	3.52138	0.748703		0.833569
			1.9102	5.43858			3.0338	0.861998	1.43639			0.827013	0.789535		1.40797	1.28453		0.540863	0.964465	1.247	2.65587	0.84137
0.761671	2.57684		2.07411			1.71977	0.961109	1.19957	1.43083	1.02404			1.39002	0.908211	1.36139	1.02785			1.59986		1.24815	1.21193
0.859994	1.44399		1.21997	3.18712		0.560905	2.1268	1.30625	1.48867	2.59929		0.591414	0.90559		0.688755	3.31015		1.15091	2.13304	1.49664	1.33203	1.71816
1.46043	1.47268		4.70892	6.56331		0.54869	1.99305	1.31605	1.27012	0.927004		0.544712	1.73291	2.82331	0.771502			0.653068	1.88309	0.925215
2.43454			1.83475	3.37637		0.724623			0.804397	1.99465			2.41662	1.94578	1.37337	0.734907		0.644177		4.49399	0.83769	1.54837
1.53899	4.92076		2.80954			0.700439	1.28988	3.05159	1.16391	1.19681		1.55057	2.79741		2.6751	1.18425		0.468966	0.68289	2.11616		0.648285
4.08234	1.65996		2.66738	3.0971		2.11566		2.06559		1.27999		1.10393	1.21479	0.9319	1.09719	1.77554		0.521123	2.07259	1.58111		1.25799
	1.98407		1.59969	1.56341		0.408397	0.847056	2.79676	1.08146	1.08441		2.05314	1.59343	2.46559	0.91881	1.76476			1.28956	1.1122	0.908905	2.62306
2.99932	2.13137		3.28493	1.80745			2.1724	0.724666	1.03922	1.19082		1.23001	1.48764	0.703094	1.23613	0.695879		0.421646	0.684123	1.13654	1.26775
1.38552	5.28486		3.40096	3.21501		1.09746	0.827934	0.741402	1.03284	0.954941		1.50748	0.763707	1.99974	2.06456	1.42688		0.380847	3.35981	1.54191	1.11711	0.704809
	2.06796		1.26786			2.52509		1.16566	1.15393	0.956438		1.24782	2.96093	1.86609	1.2271	2.8052		0.398654			1.27815
0.998699			3.00206			1.05783	1.46057		1.25111	1.689		1.91668	1.41094		1.6979			1.13464		1.62976	3.08862	1.78432
0.834144	1.90242		1.75436	3.27542		0.346737	1.02678	0.922264	2.42448	1.74409		0.74037			0.811786	3.00105		0.851063		0.90692	2.74188	0.65195
2.1752	5.18398		6.61473	1.47772		0.480072	1.21803	2.22615	2.06255	2.92454			2.28158	1.29762		0.846839		0.50806	1.63118	1.59808		0.987385
	3.37973		5.74196			0.867414	2.86508	1.20423	0.834512	1.02104		0.43396	0.828848	1.10867	2.01545	1.86316		0.66552		1.20408	3.10846	1.44684
1.26954	2.35652		3.75319	2.14924			2.8258	3.413	1.54783			0.354997	1.16047		0.7751	0.597175		0.556232	1.25666	3.14545	1.52537	0.805473
1.01237			3.72051	3.54441		0.992169	3.67901	0.931666		3.97791		0.691308	1.58944	2.25504	0.734302			1.32508	1.93463	1.12677	1.02357	0.737092
	2.37099		2.10239			0.670193	1.72399	0.761014	1.28081			0.742692		1.63705	1.27606	1.88487			1.39121	1.4915	1.22322
2.68422	3.61264		1.59546					0.809833	1.79531	1.02765		0.715645	1.53266	0.666063	1.42186	1.87386				1.2699	0.709602	0.675881
3.71676	1.79714		1.72775	4.08719		0.71679	1.83651	1.14866	0.732511	2.64929		0.690931	2.00097	3.00278	0.852261	0.721685		0.758038	0.996713	2.71481	1.27652	2.43008
3.47913	1.63165		2.39844	1.80213		1.33774	0.644441	0.819426	1.23059	3.41983		0.965205	1.7357	1.29939	1.13444	0.61776		0.769119		0.96443	0.775253	2.16525
3.20991	1.63867			1.19458		0.499433	1.45152	0.536892	0.979663	1.77146			3.54328	0.959328	2.73901	0.745517			2.32542	0.653761	0.890997	1.907
1.63795	2.1343		3.02614	2.24564		0.667416	2.4938	1.36527	2.7584	1.10727			1.05984			1.32707		1.29746	0.771295	1.47782	1.23713	1.76609
3.30536	2.9681			2.13303		1.11369	1.96266	1.30826	2.64431	1.22266			0.649258	1.45309	1.52029	1.16112		0.342217	0.808736	1.21898	1.74025	1.30796
1.90184	1.57181		1.38355	3.08069		0.451873	1.34999	1.64799	1.6497	1.45784		1.08457	1.85999	2.92295	1.56125	3.00653		1.05783	0.743364	1.17906	0.917099	0.887495
0.748296	4.02064		4.25577	1.83707		0.716224		1.46296	1.40963	1.49072		0.562046	0.686123	0.834109	1.1377	1.90768		0.47761	1.4994	0.902779	1.25226	2.55331
1.21384			3.49351			1.54676	0.672111	0.936338	1.00357			0.569465	1.00985		1.23	2.49095		1.43298	2.3055	0.86529	1.48098	2.57963
1.97421	1.54873		4.16045	3.47084		0.691699	1.12579	1.44		2.1615		1.86862	0.926989	1.29877		2.89257		1.39607	1.03797	4.20629	1.56224	1.7869
1.08687	2.87028		1.46482	5.27664			2.23053	0.754062	3.27121	1.06565		1.0252	1.81681		1.0599	1.36627		1.50997	2.45293	0.844076	1.55764	2.23336
2.00003				3.10161		2.1213	1.31648	2.33248	1.75271	1.90356		0.802264	1.38063	1.71959	0.966771	1.28465		2.19512		0.786741	1.00352	2.10247
1.05128	2.08106		1.90165			0.488918		1.02044	2.41892	2.28681		0.700105	2.1065	0.763676	0.967647			0.9804	1.0249	0.90027	0.974421	1.11277
0.673739	3.52232		2.61073				1.05207	0.731956	0.675843	1.20514		0.764144	1.28501		1.43501	1.16512		1.66292	2.11473	2.23189	1.37364	1.65065
1.31618	1.97468		2.50745	5.73637			1.68118	1.21108	1.33487	0.892468		0.891829	1.80056	2.86952	0.638877	1.1318		0.520305	1.48781	0.842688	2.82805
1.19469	1.53155		1.70936	5.63144			1.12368	3.25457	0.771136	1.16327		0.642812	0.983814	2.26559	0.8062	1.15275		0.751662		1.5624
1.37029	2.00563		2.02636	1.38593		2.27996	3.22938	1.41396	1.63813	1.05411		0.555778	1.1901	1.37069	1.54372			1.03264	1.00964	1.00082	1.90114
2.8901	3.29942		2.63851	2.8835			1.6525			1.08325		0.561814	2.83642	1.90339	1.4156	0.834879			2.48676	1.01143
0.748141	4.82565		4.76792	3.12339		0.698519	0.839659	0.764198	0.890496	1.45554		0.407851	1.76192	0.765029	2.64659	0.825145		0.759354	1.11213			0.954938
1.60099	3.7354		3.349	6.20933		0.374562	1.13921	1.2399	1.14753			2.017			1.58775	1.39856		0.443838	1.8868	1.08526	0.681826	0.787749
1.72965	3.65113		1.56323	3.19274		0.797656		0.682138	1.50474			0.357497	1.30645	0.971107	1.29564	1.43481		1.91008	2.48891	0.963695	1.34306	1.18301
1.94695	3.36329		1.20417	3.35818			1.76816		0.776931	2.23073		0.491585		3.83895	1.05753	0.860423		0.850379	1.59929	1.3242		2.15864
0.720237			2.33504	1.50292		2.19003	0.736262	1.31834	1.13583	1.13084		0.56535	1.24991		0.896632	0.81221		0.543761	1.09517	0.759213	1.6542	0.815075
2.98018	1.95465		3.77984	2.3334		0.423237	1.60558		1.32469	1.01131			1.63136	1.30645	1.35836	0.940792		1.89233	0.939403	1.0303	1.63182	1.27704
1.51225	2.00535		4.57743	2.9506		1.16208		1.20982	1.26834					2.40855	0.906077	1.04258		0.478752	1.02581	0.925663	1.67505	1.82251
0.729696	1.59525		1.19655	3.96882		0.513063	2.5181	1.1135	0.944584	0.853189		1.33934	0.801931	1.20881	1.37232	1.69049		0.963481	1.3776		1.16827	1.92407
1.12855			5.12286	3.94128		0.742396		1.03226	1.86084	0.75716			1.06513	0.89125	2.11926	1.11606		0.627028	2.54185	1.76041	0.997829	2.42738
	4.50998		2.4867			0.312441	0.70122	1.04176	1.93845			0.504079	2.35447		1.2676	1.38557		1.58041	0.710433	2.59829	0.963778	0.822625
1.21086	2.37724		1.33111			1.00163		1.65112	2.89629	0.867841		0.894755	2.06837	1.73842		2.54839		1.80814		3.37466		2.19753
1.32645	1.26055		4.07968	2.3936		0.446888	2.60287	1.34674	2.91989	0.912818		0.379821	2.66354	0.796097	1.51368	1.85862		1.30034	0.762736	1.9502	1.42311	1.87186
1.68881	1.89166		1.56079	2.48955		1.36591	3.50132	0.951632	1.68574	0.851143		1.33747	3.97766	2.56854	1.10947	0.891556		0.560064		1.69548	0.719491
1.33294			1.64017	1.88846		0.739333	1.49508	0.820395	1.20634	0.919935		1.01319	1.02251	2.30988	2.6049	1.12177		0.712009	1.77584	1.56511	1.49437	1.1182
2.19404	4.6993		2.99307			0.330355	1.84295	0.866438	0.903449	1.99767		1.9549	1.7178	1.54576		1.5852		1.46312	1.6543	0.814631	1.42405	0.952401
	1.9451		3.59516	2.45224			1.13536	0.750487	2.77258	1.59916		2.38487	2.10027	1.28707		2.07341		0.693042	0.837456	2.77265	1.4602	3.00441
2.03108			6.17283	1.48691		2.55704	0.983316	0.738368	2.45899	1.96884		0.341155	1.29084	1.64485	1.65372	1.0017		1.35725	1.36957		1.27717	1.23571
0.990309	2.32791		1.57366	1.99915		0.492588	2.83261	2.7897	0.867912					1.053	1.36075	0.846235		0.753012	2.25534	1.32867		1.01437
1.46717	4.67295		3.20182	2.3586		0.790596	1.57315	1.10177	1.03992	1.22997		0.364301	1.04895	1.59778	1.58774	1.87329		0.889076	1.35137	1.08775		1.02936
3.52447	2.08235			2.529		1.55635	2.0661	0.703527	1.09338	1.94801		0.491892	1.72568	1.12192	0.91579					2.04944	1.33381	0.783375
1.53249	1.4083		2.94694	3.66085		2.1464	2.41585	1.86313	1.93222	1.27414		0.398596		0.848951	1.34317	0.690383		1.01621			0.941438	0.869389
2.18346	1.3099		2.40887					1.48871	2.8764	3.82945		0.539994	1.24522	3.28009	2.27087	1.89225		0.705174	0.709221	2.21089	0.850201
1.06099	1.81062		1.65723			2.07379			0.785153	1.36558		0.571147	0.741273	2.18077	2.50613	1.30297		1.15708	1.88163	0.974913	2.06244	0.924598
1.78445	3.58132		1.80453	3.96562		1.37139	3.02291	1.27674	0.95342	0.821268		0.790128	0.829263	2.11585	0.964087	2.25669		0.65964	1.96841	0.890734		1.12966
1.86021				2.46162		0.782543		0.829679	1.1737	1.84668		0.825368	1.67011	1.74392		0.914676			1.77986	1.15428	2.35287	1.40953
1.33705	2.97794		1.42881	2.1323		1.43665	0.732854	1.41605	3.32215	1.82021		1.72125	1.9483	1.18188	2.84077	1.20929		1.18331		3.30087	1.1224	1.09994
2.73204			1.90269			1.46273	1.96604	0.764085	1.82589	1.06418		1.24684	3.95603	2.59531	1.76616	0.596506		0.891377	3.48494	1.27471	1.02959	0.770658
	1.12589		2.94977	2.05305		1.4597	1.12462	2.72029	1.11201	0.710776		0.786912	2.86528	2.40306	0.936519	1.40506		0.521511	0.82309		2.01908	1.44341
3.76696	3.17895		6.19762	3.02124		1.86634	1.22801	1.10416	0.776868	1.59106			1.11313	2.3329	0.927824	0.849774			1.18849	1.04028	1.32701	1.53041
1.61291	1.68765			4.26737		0.635537	1.57662		1.48145			0.675364	2.64786	3.13444	1.1722	1.6108		1.26971	2.25924	1.10859	1.03489	2.19977
1.30578			1.91824	1.23301		0.412374	1.15082		0.750879	1.5627		0.91861	1.13361	1.087	1.09372	2.37358		0.52371	1.61408	4.4563	0.713587	1.68043
1.09154	2.5368			4.58383		1.56029	2.80186	0.966041	1.00427	1.22743		0.471055	1.54195	1.00784	2.05266	0.880493		0.965377		0.913623	1.49786	0.87347
1.91607	3.04701		3.04806	3.28598		0.798952	1.60455	1.77064	0.78827	1.79829		1.33457	0.846019	1.16076	2.14141	0.898955		0.397004	1.93439	2.01227	0.80807	1.15633
1.74758			5.85844	4.51892		2.26663	0.99895	1.59651	1.09629	1.0219		0.711682	1.02237	1.22728	2.73112	1.62301		0.81997	1.08291	1.3916	0.896187	1.02502
1.42346	3.20098		4.04237	4.26307		1.95246	2.4278	1.43533	1.61485	1.04989		0.517783			2.03459	0.755806		0.386353	1.77868	0.999361		0.690679
2.18968			1.61189	1.03408		0.758376	1.13979	1.50716	0.789301	2.54862		1.19425	1.45677	1.2451	0.875528	1.57198			0.995419	1.68776	3.2688	1.92891
1.39523	3.26777		2.47344			0.370932	2.01561	0.884021	1.04429	1.89155		0.714112	1.86067	3.03855	1.10108			0.73448	0.979324	2.248	0.811493	2.56143
1.81704			1.49568	5.8575		0.580462		1.15645	3.35624	2.08849		0.507425	1.15761	1.60857	0.80274	2.90856		0.569326	1.11275	2.22621	1.03815	1.47659
1.6715	2.10249		1.2432	4.06165		1.83094	1.83122	1.03167	1.82153	2.3186		0.576775	1.89725	1.93988	1.19819			1.60283	2.24455		1.09161	0.815225
1.39009	5.19845		1.51357	4.09799		0.401925	3.78009	1.59614	1.4323	1.02996		1.81587	2.09775	1.40692	1.4754	1.08441		1.29663	0.965054	1.30835	1.03804	3.2662
2.2638			1.0532			0.712008	1.82038	1.09236	0.826284	1.34785		0.503966	3.76409	1.40043	1.27039	1.18554		1.27504			0.661249	0.999512
1.73122			2.63739	3.79984		0.413292		1.12905	0.845973			0.333027	1.31929	2.13567	2.5204	1.89907		0.624805		0.711798		1.16957
1.46443						0.768562		1.19141	2.52363			0.69575	0.854001	1.16539	3.15815	3.22203		0.400854	1.55511	0.715256	1.35419	0.962666
1.51628	2.60617		5.34707			0.450426	0.848789	1.73531	1.63339	2.1859		0.455453	0.671809	4.24622	0.832924			1.8446	1.0238	0.850697	0.622394	0.850421
1.46886	2.14202		3.8124	2.37069		0.553428	1.01907	0.66233	0.854178	1.31607		0.889277	1.56225	1.77216	1.09127			1.74279	2.44745	0.916629		1.19087
1.38326	2.39554		4.32342			1.12528	1.45648	0.662638	2.88551	3.6629		0.413523	0.891282	0.995143	0.988211	1.44529		0.409693	1.48784	3.89122	0.97542	1.51832
0.756314	1.28552		1.61454	4.14322		0.705414	1.66974	0.870783		3.25777		0.466341	1.11233		1.21033	1.23663		1.26516		1.49648	2.58012	0.790636
1.76419	2.2504			3.34052		0.408817	2.3806	2.1947	1.42602	3.49676		0.601165	1.90885	0.986495	2.03858	0.688819		2.08636	1.55135	1.48653	1.3293	1.01147
1.39508	3.88562		2.20904	1.2328		1.47012	1.83433		1.28098			0.500986	1.05026	2.94455	1.11329	1.0872		0.371769	1.4717	1.38411	1.15921	1.33692
2.53888	1.77469		1.6945	2.99504		1.16335		1.40777	1.32642	1.19551		0.38592	0.858746		0.850386	0.928322		0.477366	0.849288	3.07192	0.802994
2.18689	1.87916		1.85635	2.78801			1.01117	1.20158	1.14055	0.950528		0.419572		1.33943	1.0933	1.75738		0.462588	0.700064		1.16203	0.811702
2.13353	1.47258		4.69688	2.87331		0.793579	2.19536	0.892079	2.86039			0.461542	1.50991	1.6107		1.27446		0.317691	1.32609	2.39047	2.05776	2.56166
3.96766			3.76733			0.943782	2.50086	1.09942		1.00813		0.830469	2.02597		0.913345	1.25175		0.685036	1.71774	0.685507	1.24033	0.961434
1.36774	2.8604		1.76217	1.48109		0.459492	1.80681	2.05651	0.818696	0.964119		1.21787	1.88001	1.0912	0.843027	2.46473		1.33727	0.943544		2.90158
2.06491	3.15883		1.71128	3.67468		1.58597	3.08972	1.26316	0.756769			0.423524	2.51431	1.31038	1.25875	0.880893		0.824116	2.33347	0.744475		1.35455
1.07407	4.56529		4.13974	2.42592		1.49724	1.46467		1.27952	0.840875		0.481517	1.25173	3.49409	1.04573	1.03319		0.46988	0.96401	1.34232	0.868805	0.935116
3.30562	1.51656		1.51542			0.682777	3.31918	0.789549	1.83427	1.04544		0.474666		1.38634	1.2882	0.893239		1.12811	1.85004	3.39788	1.62561	0.792793
0.644784			3.3499	1.5944		0.434322	1.7721	2.16503	1.47126	1.54702		0.531948	1.18259	1.24673	1.60205	1.41968			1.42657	1.15862
2.96973			4.84848	2.37205		1.5045	1.3649	1.18754	1.69703					1.05709	1.23082	0.975853			0.962993	1.32364	1.08528
1.17844	4.07242		2.24888	1.52238		2.07705	2.6247	2.49187	3.13091	0.689305		0.355299	1.28476	1.35322	1.10111	0.961606		1.12897		1.56606	1.84791	1.04207
3.79656	1.37006		1.98395	4.86162		1.15399		1.39659	0.893855	0.805307		0.741641	3.12453		0.748529	1.07559		1.21406	1.07067	0.950369	0.626314	3.41051
1.0961	1.9264		2.19633	2.09797		2.15826	1.35942	0.779317	0.693428	2.93725		0.366786	0.799417	1.33177	1.1758	1.92661		0.747348	3.55021	0.73819	0.719746	0.970957
1.55377	4.44423		1.86383	1.38825		0.446122	3.6966	1.46171	0.854933			2.38926	1.58495	3.66014	1.83295			0.782784	0.84	1.73892	0.942102
1.22629	1.74798			1.96213		2.34946	0.970242	1.58059	1.15309			0.668168		0.749677	1.47529	0.928038		0.494992	3.30024	0.895716	0.686213	1.72272
1.13032	1.23059		1.86158	1.70642		0.780521		2.41644	3.36766	1.28393		0.413238	3.60673	3.53944	1.08354	1.20689		0.330183	0.718353	1.66368	0.857684	2.37202
3.02676	2.50713		2.23277			1.14866		1.19932	1.45604				2.55352	1.11517	2.61659	1.49685		0.61566	1.76069	0.909295	0.815432	1.67366
3.96418			2.14289	2.45072		0.557142	2.18935		1.16243				3.1605	1.26086		0.952839		0.962582	2.01451	0.955014	1.24849	0.804081
	1.8212		1.78585	5.46378		0.701284		0.666369	0.905356	0.859768		0.899376	3.31663	0.679439	1.33945	1.02916			1.20227		1.64941	1.14041
1.51568	1.51992			1.91538				0.680906	1.07495	3.70126		0.614588	0.966148	1.55584	0.591778	0.987152		0.989776	2.09332	0.757486	0.80379	1.03162
0.767654	2.40576		3.81847	1.75166			1.51352	0.596201	2.43614	1.21197		0.52617	1.55876	0.625696	0.933126	0.944571		1.39987		1.07755	0.760902	2.69655
1.28107	1.26472		6.01222	1.86791			1.1344		1.39665	2.08099		0.73342	1.29895	1.0334	0.916344	0.745685		0.667134	3.25457	1.99889	0.933095	1.89639
4.09923			1.39219	1.48371		2.47195	1.02842	1.03981	0.703234	3.85245		0.491348	1.21556	0.867803	1.79878	2.49116		0.398062	1.80399		0.773873
2.57204	2.68877		2.47639	2.27875				0.727821	1.2381	3.82055				2.61251	1.49355	1.88769		1.12588	1.85924		1.28246	0.955142
2.44437	4.49585		3.06038	1.71006			0.646652	0.739253		2.8455		0.479509	0.913489	1.48188	1.36222	1.56289		0.83299	1.01232	0.934903	0.914438	1.27809
0.994703	2.07934		3.95561	2.26323		0.557774	0.846671	2.39633	1.47753	1.79522		0.807974	1.28278	4.00819	1.78126	0.968331		0.380409		1.9113	0.625564
1.52353			4.16481	2.06719		0.803151		1.42888	2.58314	1.47376		1.81389	1.00744		0.751775	0.784657		0.573882	1.0885			1.40679
2.99716	5.00611		1.50241	1.39596		0.838783		0.748033	1.23318	2.92445		0.494587	3.23304	0.772978		3.10661		0.571462		1.15971	0.859204
2.00558	1.86126		2.23246	2.47537		0.672292	1.1768	1.41939	0.993651	1.65945		0.521322	2.42943	1.22932	2.62891	2.65505		0.50852	1.30634	2.81826	1.29056	1.7609
1.39748	2.19756					1.0584	1.27875	0.712334	1.78979	0.94781		0.746925	1.0081	1.94162	1.58596	1.25384			2.60278	1.10319	0.839899	1.76826
2.22501	4.21575		2.18596	6.40606		0.399169	1.20361		1.81036			0.655584	2.63275	1.11173	2.42531	2.87302		0.590156	4.18579	1.17169		0.950029
3.43561	3.76855		1.56219	4.73336		0.715375	1.9571	0.797609	1.17968	1.19586		1.05818	4.18629		2.67188	2.15898		1.35164	2.12626		1.8648
	2.19889		3.10816	1.46177		0.642191	1.11621		2.1876	1.60717		0.43509	2.18443	1.00479				1.25749	2.83583	0.875759	0.969161	0.833257
4.04935	3.39804		3.51818	1.62044		0.384906		0.969578	2.2807	2.50812		1.93853	3.40398		0.699256	0.747022		1.46442		2.90145	1.6888	1.69579
	1.10235		2.32118	1.33755		1.42789	1.34735		1.00619	1.49229		0.479274	1.0119	0.916004	0.833452			0.890189		0.79748	1.62824	1.24914
	2.96127		4.10357	2.10628			3.77822	0.561164		1.31138		0.958978	1.3346	0.936118	1.29661	1.37042		0.6916			1.05395	0.88988
3.38365	1.92626					2.55151	0.940859	2.82661	1.54107			0.587815	1.43869			1.24297		0.700822			2.21415	0.893425
1.05074			3.36604	2.02301		1.2432	0.972274	0.79854	1.58451	2.36091		1.90059	1.59346		1.10108	1.48425		1.22248			0.921115	2.98059
1.27005	2.05067		2.49499	1.4128		2.48537	1.55519	1.24798	2.0375	2.76576		0.60937	2.51509	2.33231	1.03694	0.928069		0.625129				3.43508
	1.86588		2.3076	4.32304		0.957701	1.19028		2.37673	2.03455		1.12219		1.02338	1.24999	3.17183					0.925118	3.32244
			3.98856	3.17199			2.53878	0.806308	1.98448	1.37993		0.599702	4.21691		0.890351			0.399473			2.00033	0.688086
2.62638	2.6513		2.43717	2.80276		1.44446	1.63933	2.94135	1.18554	1.22434		1.31003	1.81295	0.79276	2.45466	2.62551		0.620512			0.911162
0.611995	1.44619		2.04043	1.85944		1.28289	0.808676	0.707061	2.21138	2.71351		0.592187	0.958537	0.831121	0.862581			1.84302			0.999654	1.36378
1.4347			3.17085	2.25346			2.33019	1.53028	3.42236	1.57895		0.40562		0.862392	1.0679			0.352833			1.15018
1.68227			2.86603	2.06122		0.846725	1.33478	0.650015	1.25928	1.06032			1.97395	1.07038	3.08177			2.08359			2.5477	0.994692
2.10313			1.63196	2.10085		1.38244	1.65182	2.14417	1.9399	1.58399		0.846872	1.94836	2.50059	1.42259	0.959497		1.49994			1.57297	2.6443
1.64445	1.06392		3.79718	2.10259		1.69892	0.750843	0.820528		0.890176		0.573716	0.73288	2.8808	2.20603			1.0603			0.764854	1.32862
1.05682	1.26296		4.06608	2.34935		0.986833	2.22457	0.877181	1.82708	0.763091		0.474117		3.06529	0.77774	0.851778					1.90612	1.4813
0.778763	0.736712		1.62521	2.16345		0.478599	0.787504	0.963301	1.23286			0.710814	0.720932		0.924397	2.3857		2.13074			1.99257	1.55251
1.2519	1.16989			2.96165			1.99253		1.16433	1.79712		0.895863	3.9983	0.911532	0.708677	0.773433		1.6692			0.7082	1.37192
2.10995	1.0276		1.87966	2.22874		0.431064	1.77036	1.2594	0.955543	3.11835		0.60059	2.43712		1.00398	1.63752					1.54851	1.47179
1.96617	1.20938		2.43665	2.36929		0.982895	0.862073	2.01552	0.938534	0.698862		0.924242	1.33334			1.21743		1.35371			1.74753
2.22152	1.61523			1.45659		1.3275	0.872853	1.84263	1.00292	0.789364		0.451998	2.901		2.08213	1.80816		0.602138			0.738465
1.19381	1.98304		1.55069	1.41765		0.66386	1.04155	0.998208	2.065	0.9107		0.826639	0.946851		0.558865	2.34996		0.493743			0.819427
2.86264	2.99161			2.07208		1.47096	0.891452	1.10511					1.61384		0.791428	1.60559		0.758897			0.933623	1.4369
2.2147	2.44042		1.42638	1.41896		1.76632		0.981495		1.74186		0.425583			1.51537	2.37065		2.03661			1.07904	1.49375
	1.91916		1.78367	1.60761		0.736969	0.985589	2.97087	1.16604	1.95082			1.04339		1.71072	0.930797					2.78902
1.666	1.24158		1.98944	1.92086		0.624247	2.60055	1.75317	0.705434	1.57241		0.921621	0.910152		1.3192			0.705374			1.7564	1.45949
1.08888	1.18373		1.49132	1.49292		1.54027	1.12941	2.11081	1.06829	0.667844		0.595172	1.25169					0.689784			2.38024	0.803442
3.32599	0.739249		1.51008	3.38273		0.913123	2.67451	0.778744	1.50011	3.74664		0.827211	2.42939		0.868997	1.09672		1.3174			1.38047
1.10768	1.35438		2.15106	2.68824			1.4639		1.72917	4.00015			0.663105		1.01766	0.754266		0.585242			0.957551	0.74847
2.71047	1.05705		5.23477	2.0889		0.900777	1.06884	3.18462	1.80268	0.711935		0.404768	2.62069		1.07965	0.942039		1.37927			0.834621
	0.955438		3.08875	5.35734		0.827241	1.11359	1.33721	2.87675			0.908375	0.907937		2.66154	2.48924					1.25375	2.13859
	1.33115		1.50606			0.718054	2.26606		1.60084			0.324838	2.65099		1.80736	0.769274					1.33738	2.92851
2.31118	0.919379		2.79337	1.55921		0.724636	1.15906	1.52383	0.878155	0.843163			2.06471		1.07114			0.542999			0.86037
1.12638	0.992565		2.30273	1.79054				0.934448	1.98608	2.91089		0.797662	1.6513		1.24108	1.31094		0.727712			1.22934	0.824944
1.20376	1.86393		2.9969	1.70304		0.949848	0.854362	1.09606		3.46866		0.513837	1.89236		2.30039	1.41992					1.2978	2.38113
0.718325	1.24009		2.2923	2.28295		0.67554	2.04624	3.30788	1.16655	1.45716		0.45304	0.962938		1.9208	0.91348
0.741214	1.20334		1.61136	3.0218		0.757061	1.66901	1.37167	2.269	3.46918		1.04021	1.15274		1.10172			0.797763			0.938832	1.61621
2.8586	1.46253		3.73847	1.77775		0.537458	1.78634	0.667033	1.07118	1.29502		0.375137			2.78079	0.655449		0.519312				1.05746
1.30379	1.57188		3.38214	2.33051		2.55739	0.924582	0.713877	1.50865				3.42843		2.77044	1.8967		0.393458			1.30079	1.98541
2.68093	0.620558		2.49522	2.18706		1.5158	0.887465		0.996631	3.04076		0.714204	1.41998		0.875228	2.2185		0.515108			0.912461	0.953795
1.30612	1.17537		1.33367	2.69438			1.82393	2.66781		3.50066		1.23232	2.41578			2.95184		0.343725			2.41677	0.87916
0.82615	2.97082		1.15807	2.49165		0.685185	1.28291	0.672759	1.82804	0.769349		0.384495	1.66694		2.09378	0.732246		0.808049
1.59815	1.15652		6.47367			1.10791		0.823899		0.991659		0.439208	0.945637		0.847706	1.52524		0.774062			2.43409	1.76441
1.09754	0.74794		3.04005	2.60019		0.710118	1.6509	1.77037	1.08088	1.1818		0.427632	1.12561		1.45104	0.738211		0.993695			1.05098	0.764725
2.7517	0.851225		1.93533	3.05		0.723948	1.56167	2.07831		1.2846		1.28152	1.94835		0.752019	1.94129		0.852423			2.09075	0.933638
2.88358	0.740666			2.0615		0.812074	1.29099	1.68103		0.852441		0.541904	0.981502			2.59322		1.17258			2.18421	0.994514
	1.60512		5.77653	2.61153		1.0788	1.50192	2.18792		1.23987		1.19134			1.21898	0.602683		1.34172			0.78748	2.12752
			1.5513	2.34889			2.10525	1.4155	2.18236	1.49433		0.643402	2.2476		0.724299	1.23374		1.21935			1.27466	1.28352
	1.82755		1.31681	5.43847		0.605861	0.832246	1.67885		1.21067		0.765491	3.41025		1.79346	0.83344						1.88166
	0.660833		2.28043	1.56843		1.2683	2.48094	0.786518		1.26477			1.6372			1.1441		2.10854			0.755241	0.711881
1.95003	1.06159			2.42905		0.610469	1.13381	3.05604	0.885692	1.04141		0.956144	1.9195		1.24695	1.39958					1.24989
1.15902	1.96333			2.17035		1.43323	1.23279		3.3131	3.52808		1.50178	0.832255			1.74349		0.454059			1.7741	0.988573
	1.44244		1.7629	2.89035		1.50189		2.11334	0.932373	0.962582			1.19879			1.082		0.525939			1.52177	3.14065
1.58335	0.850078		3.28835	3.64613		0.888151	2.83188		1.97449	1.04415		1.19295			0.788601	1.39148		0.361372			1.28398	1.19141
1.49252	1.07134		4.32727			0.732778	0.932029	1.34817	0.905682	0.740178		0.446848	2.71165		0.895223			0.511377			0.884902	2.74758
1.3998	2.23546		2.12036	2.11557		1.21006	0.862045		1.04421			0.544647	2.08654		1.2488	0.962177		0.408841			1.36857	0.935433
	2.22607		4.68709	2.51288		0.636449	2.16437	1.95893	1.31914			1.37002	3.00272		1.41429	1.13722		1.9654			1.86383	2.25709
1.70804	1.73109		3.54182	5.38184		1.84876	1.26336	0.921928	0.98713	1.13244		0.752326			0.805517	2.93629		1.03709			1.02611	0.970985
1.06114	3.98141		3.1189	1.5704		1.29475	2.07046	3.33778	1.46452	1.92056		0.637055	0.904653		0.648439			0.941641			0.830075	0.774287
2.26172	4.05981		1.35457	1.62286		0.822465	3.53807	1.11887	3.17873	1.15348		0.466718	1.34464		1.03581	0.93113		1.20369			1.18642	0.865078
0.764997	3.49194		2.1663	2.07639		0.640303	0.785441	2.03836	1.5278	1.2775		0.518173			1.20469			2.05274			0.796734	0.709487
0.827639	0.705616		5.26803	6.06024		1.2549	3.23988	0.797838	1.65305	1.37254		0.972802	1.50381		1.30135	3.16266					2.54993	1.18042
1.4909	0.936308		2.64914	1.37677		0.574933	2.2255	2.6085		1.21316		0.781081	3.95378		0.823845	1.83876					1.17467	0.803291
2.35085	1.97262		3.37501	2.20231		0.381935	2.42512	0.918198		1.26375		1.29031	1.36251		0.955938	1.01224		1.14261				1.75962
1.18425	0.796369		2.73861			2.36593	1.97286	1.19979	1.64157	0.936636			1.0958		2.24561	1.19586		1.17206			0.589296	0.760685
1.85451	4.03549		4.08803			0.449469	1.94502		2.1273	0.985745		1.70864	0.742909		2.62037	0.857841		0.686361			1.15567	0.763489
2.91516	1.37513		2.06498	4.96878		0.655956		2.90661				1.8906	2.94362		0.615822	1.085		0.953397			2.81761
2.03158	2.07914		3.5834	2.13453		0.702521	0.907717	1.01153	1.01955	2.5996		1.07123	3.12238			0.935174		0.398997			0.883395	2.11704
3.88017	0.996068			3.66204		1.71392	1.12438	1.56426	1.51101	1.33373		0.804653	1.32343		0.925968	1.58011		0.493489			0.619269	0.710205
2.94555	1.72712		1.74503	2.09915		1.94802	0.679263	0.720773	2.18876	1.72097		0.534059	2.69101		2.27572	1.87598		0.840619			1.80076	2.54556
2.84242			2.05856			0.427992	1.39725		2.10232			0.594332	1.52139		1.23504	1.0494		0.532906			1.26534	2.69388
	2.21144		3.08291	1.71663			1.34458	0.718437	1.1748	0.777482			2.13459		0.740415	2.32827		1.48475			1.12633	2.51714
2.57	3.13314		2.10553	1.44392		1.995	0.799548	0.735985	1.18202	1.54931		0.366012	1.08075		0.868048	1.39694		1.25663				0.965735
1.12817	0.823952		5.22373	4.13022		0.490818	2.48645	1.61921		1.6067			1.5112		1.36356	2.40188					1.17704	1.09857
0.727991	0.560801			1.55503					1.12218	1.19533		0.974434	0.982581		0.916423	0.836408		0.734936			1.33439	1.1537
1.17605	1.24054		1.69537	2.3626		1.05405	1.28063	1.36601	3.00383	0.886732					1.49224			0.352737			0.787184
1.57331	1.45269		3.13098	2.1898		0.441649	0.835965	1.43792	1.24216			0.752312	1.06699		1.25922	2.76505		1.19825			1.36599	1.18452
0.70865	0.828191		1.35582	3.1578		0.351433	2.62809	1.18439	1.78275	1.83742			1.24396		1.13411	2.90653		1.37489			2.13694	2.33418
1.84937	0.703805		1.5087	3.75041		0.836805	1.06799	0.941159	2.26146	0.710319					1.32988	0.740546		0.410699			1.37873	1.23925
1.3118	1.28608		1.18769			1.47829		0.517937	1.55905	2.17114			2.32083								2.70238	0.891585
1.56719	3.45629		2.52168	3.25613		0.689376	2.61993	2.94621	1.25751	1.77517			2.24873		1.13244	1.14442		1.5425			1.25564	1.36941
2.84696	3.11901		2.45676	2.78967		0.801836	2.39021	1.10634		1.05449					1.0332	1.72527		0.817938			1.14843	3.40511
2.05344	0.908307		3.12061	2.38958			1.36574	1.5296		0.783473			1.05297			0.951723						1.29315
1.37751	0.837972		1.51482			1.34939	0.966484	1.38541	0.981289	3.02377			0.826097		0.938561	1.54595					1.16483	3.25393
0.684536	0.896464		1.44744	5.64288		2.00318	2.27785	2.13936	2.14482	1.28245			1.09107		0.996902	0.778126		0.452904			1.40509	1.76033
1.5144	3.07108		2.75487	6.34884		2.07424	1.58417	0.990104	1.31395	0.746511			1.0307		0.855661	2.1365		1.71265			1.13989	1.6459
	0.898625		4.89508	5.93267		0.445036	1.14407	1.96337	1.24533	3.69954			3.6348			1.89732		1.45443			2.04452	0.830999
1.58699	2.8277					0.783549		1.73955		0.936576			1.15487		1.54904	2.33397		0.93442			2.22352	1.12196
1.27611	0.862191		2.13611	6.27469		0.556943	3.45439	1.10567		0.891092			3.84125					0.39825			1.30671	1.78487
3.673	0.910146		1.91634				1.53459	1.59246	2.55329	1.80526			1.06713		1.6636			0.764365			0.714955	1.30671
1.53223	1.45222			2.53939		0.442571	2.57573	2.63508	1.05729	0.829813					0.965	1.30113		1.59657			1.39204	0.505993
	1.41609			2.14672		0.330337	1.23203		1.0616	3.16976			1.08359		1.72131	1.92697		0.476713			0.999139
1.6174			2.17818	2.03094		1.46385	2.03171	3.08548	1.42995	1.1804					1.48834	1.50971		0.523439			1.10409	0.975505
1.08848	1.79371		6.13164	2.10061		1.15531	1.49368	1.759	1.80173	2.13344					1.65639	1.96871		0.861627			1.29595
2.90385	2.186			1.9273		1.01343	1.06117	1.28079	1.86122	3.12763			1.03261		2.11248	1.04262		0.614624			0.749763	1.65731
1.38407	0.801275		1.57689	2.7124		0.997578	1.50585	2.18937	0.941804	2.65538			1.75015		1.11198	0.910928		0.813886			1.30224	0.900933
2.22691	1.52407			3.39166		0.665612	1.93533	0.857707		3.48624			1.14582		1.38712	0.857342		0.363029			1.08163
1.135	0.868823		2.51594	1.8713		1.36531	1.10779	1.298	2.07971	1.38818			1.33416		1.51831	1.66572		0.596923			2.60191	1.9615
2.94875	0.918352		4.4966	1.65052			2.82264	1.43184	0.859474	1.59916			1.19268		1.28047						0.731
3.10503	1.5506		4.79351			0.665346	1.46553	2.57299	1.71937				1.11336		0.786785	2.18746		2.11052
3.84656	1.3956		1.33225			0.445024	3.14134	1.04752	1.57824	2.31816			1.30453		0.754343	2.04757		1.02901			1.89948	0.858431
0.90047	0.762415			2.38629		0.783886	1.36142	1.59845	1.23336	1.00862			2.0216		1.24618	2.9291		1.79475			1.00373	1.48504
1.10165	1.30649			1.68499		0.461477			1.19393	1.66742			1.45956		2.18826	1.12832		0.902904				1.13403
1.13961	2.93657		3.02705			0.522677	1.99279	3.3007	1.98729				1.47647		0.841204	1.46075		1.37975			1.84276	0.973029
2.72024	1.11109		1.27584	1.48345			1.34991	1.04508	0.914472	2.09333			1.62795		0.939003	1.14556		1.30779			1.85988
2.14408	1.38135		1.83352	2.86914		0.52803	0.855764	1.80906	0.985942	1.18021			1.63865		0.73353	0.85388					2.3848	0.857777
0.990082	2.01614		3.72553	1.41007			3.5012	1.3569	1.95064				2.00462		2.16259	0.823886		0.500305			1.08288	1.41166
2.89049	2.14693			2.11333		0.858099	1.13131	0.806846	1.37804	1.58837			1.14039		1.70331	1.14758		1.25403			1.59519	1.86694
1.50184			3.75761	1.32177		1.09578	1.0025	0.898226	2.912	1.49066			1.47002		2.48718			0.735067			0.994924	0.990489
2.41318			1.51906	4.18103		2.79621	0.889252	1.21787	2.66267	1.62955			2.37885		1.0632	2.2893		0.374514			1.0468	1.62019
1.22519	0.789957		1.86974				3.4056		1.44909	1.26737			0.917966		1.14614	2.32449		0.513073			2.93826
1.25264	1.82371		1.34313	3.31811		1.01961		2.64151	2.19128						0.629442	0.859005		0.69708
1.72492				3.72282		2.56905	3.56759	1.63621	1.65781	1.02035			2.53677			2.16905		1.55043				0.737629
1.08592	0.898731		1.7246	1.76089		0.865214	1.7393	2.01219	0.782538	1.10163			1.64993		0.727755	2.45142		1.23131			1.11135	1.11681
1.67975	1.11086		3.80381	3.40094		1.23431	1.59621	1.43982	2.2622				1.26272		0.735572			1.25748			1.37948	1.0907
	1.51973		1.30219	1.78095		2.19049	1.48874	0.93794	0.743076				1.55		1.18109	1.23099					1.19306	2.29367
1.41325	1.09353		1.36353	2.00086		0.614142	0.868158	1.39903	0.766793	1.24227			0.760003		0.783528	2.25602		0.71186			1.23199	1.03022
2.81073	1.76879		3.19039			0.724011	2.75722		1.3838	1.01561			0.755464		1.2742	1.57393		1.72434			0.917065	0.570948
1.65375	1.71734		5.4277				1.26475	3.19432	1.52942	0.968779			1.34847			1.24249		1.85368			0.877161	0.879665
2.7264	2.09839		3.82998	4.40431		0.972728	1.0274	0.946372		1.04221			1.11431		1.10623	1.03206		0.424152			1.14865	0.738213
1.69465	0.703733		1.29901	3.3851		1.13806	2.41355	2.5622	1.71879	1.04118			2.62585		0.816988	0.742638					0.87645	0.82781
2.83275			1.98889	1.32134			0.642932	3.29209	0.984944	0.941727			3.34268		0.815137	1.01663		1.31226			1.02452	1.33685
1.5602			2.58832	4.15482		1.68571	1.13337		2.1483	3.67989			1.97473		0.870531	2.34415		0.407126			2.33189	2.64255
0.681567	0.735173		2.69655	5.97802		2.05021	3.68189	1.23538	1.42705	1.41586			2.36138		0.766003	1.1484		0.887336			0.968991	1.58338
1.98543	0.939287		1.57519	2.08088		1.00874	3.51028	1.55077	1.2692	2.22408			1.20789		1.15631	1.50651		0.96471			3.12031	2.28713
1.89234	3.7875		3.89513	3.77645		0.459256	1.8206	0.80734	1.06907	1.32862			2.17499		2.34765	1.16568		1.02149			1.13733	2.47358
0.893084			2.73109	1.69029		0.886606	1.67051	1.56437	2.11071	0.893882			1.26621		0.972134	1.22929		0.95977			1.23725
1.194						0.520852	2.40553	1.13114	1.19488				0.798385		1.14761			1.00394			0.967268	1.16377
	3.20185		2.17416			0.541323	0.7476	1.44695	1.47974	2.77147			2.4068		1.6277			0.467139			1.68868	2.14776
3.44418	0.800466		2.04359			0.659812	1.52794	1.36235	0.929652	3.64839			3.38589		3.26059	1.3658					0.586117	0.876787
1.30493	2.37146		2.8941			1.00085			1.04793	0.709369			3.07755		1.01044	1.0747		0.394264			0.996485	1.36886
1.4745	0.911181		4.76802			0.822208		2.37166	1.32361	1.17333			0.956074		2.18569	1.3059		0.322539			1.57427	1.06569
1.06228	1.7654		5.51237				2.0987		1.14205	2.87659			1.23899		1.36801	1.86201		2.13717				2.29506
0.999353	1.48111		1.73974			0.815522	2.16679	0.827318	2.40277	2.18839			1.1212		0.985537			0.867457			2.72494	1.26029
1.30242	0.628994		1.55613			1.32491	0.820178	0.910017	1.14588	0.697321			1.31114		2.35555	0.564776		0.526613			0.80359	1.43659
0.993157	0.785015		2.77389			1.24382	3.08948	2.5846		1.07422			1.69638		0.74962						2.04775	1.28688
1.6761	1.13444		2.80965			0.683816	1.06765	0.794773	1.18926	0.819296			2.01047		1.29958	1.58718		0.457087			0.724172	0.868512
0.9841	1.19112		5.9017			0.517078	2.16231	0.704573	1.44199	1.36649			1.18471		0.730899	0.772932		0.641101				1.17195
1.63323	0.744146		3.51707			0.92279	0.868345		0.846637	1.35017			1.61159		1.45167	1.03204		0.369638			2.76709	2.54173
	5.01875		5.29244			0.802176	3.56366	0.621103	1.03088	1.84316			1.41714		0.584113	1.2538					0.722626	1.15749
0.951815	4.7779		2.0517			0.478768	0.771161	1.57284	3.31023	2.35279			1.79542		1.37617	1.29412		0.371062			1.24371	1.0201
1.69313	1.67516		2.41443				1.8594	1.3451	1.85344	3.77696			0.847017			2.13777		0.512228			1.45241	1.08122
	2.70177		1.55743			1.59025	2.9457	0.968353		2.70564			3.61516		0.726983	2.65571		0.767905			1.28906	0.752129
	1.39959		1.32019				0.942975	0.843902	1.09363	0.978456			1.16248		1.31676			0.841324				0.705895
	1.43871		2.23988				1.10224	0.768358	2.45557	1.34093			1.35553		0.74694	1.02535						1.5105
3.97977	0.913406					0.541476				0.75653			1.61393			1.23068					1.64434
3.79935	1.06393		1.696			0.76303	0.668155	3.14144	2.08341	1.14733						1.09238		0.335064			0.977999	0.630931
2.69651	3.70183		1.82011			0.68919	1.50764	1.02218	1.01309	2.23			1.17389			2.38012		0.637969			0.893629	1.05514
3.90087	1.16824		3.77874				1.62237	1.55787	1.82773	3.2068			1.27138		1.21172	1.13474		0.619879			2.66113	1.13839
	1.18214		4.83689			0.367646	2.33848	1.07918	2.69016				3.5458		0.981829	1.30594					2.50935	1.30309
2.22165	1.3797		3.5437			1.56866	1.31569	2.03214	0.651658	1.96573			2.10491		1.57904	1.17395					2.14687
1.22907	1.17264		2.48875			0.757309	1.01973		1.66928	1.88682			1.56042		0.68086	0.858692						0.642546
1.55792	0.837399		2.93535			1.73513	1.07775		2.44585	3.07502			1.84665		0.807247							0.808946
1.03953	2.36685		5.51232			2.23282	1.0024	1.30136	1.2301	2.23013			4.16602		2.47281						1.28658	0.910561
0.740197	0.731722		4.78592			2.47234	1.06335		0.724107	1.5441			0.904804		0.60155	1.96923					2.02845	3.13487
1.4646	0.716242		1.87268			2.77025	1.30132		1.81689	0.789163			2.38613		1.97375	0.942587					1.87375	1.10623
2.4444			1.82818			0.500119	0.975971	1.35713	1.03739	1.97771			1.80178		1.29904	1.07778					1.25842	3.26716
1.80081	0.783435		1.12112			0.477629	1.00643		1.54375	3.04995			0.879691		2.75878	1.69654					1.37662	1.71818
1.01224	2.23897		3.26128			1.17575			1.32854	0.692074						2.30681					1.95599	1.14746
1.24313	2.57022		4.45233			1.35562	0.844826		1.40648	2.1312			1.41871		1.09922						2.94372	0.819821
1.09887	4.92624		4.62066						2.12851	1.84718			1.07741		2.22387	0.875663					0.699465	1.03761
1.46503	1.7627		1.3733			0.359385	1.65631		0.933593	1.77701			0.797574		1.64585	0.670948					2.14425
1.21541	1.07335		3.94087			1.2621	1.51098		1.85517				0.894188		1.26177	2.04569						1.02012
1.38693	1.44705		2.43941			0.445311	1.62349		1.9043	1.35013			1.58276		1.20435							1.06904
0.920847	2.59518		1.30719			0.808091	1.97272		1.27531	3.78716			1.64492		1.10847	1.47945					2.20652	3.03172
1.35683	2.10349		2.76929			0.90624	1.54997		2.16491	0.980406			1.16592		0.952127	1.07321					1.24593
2.13052	1.43882		2.68559			0.485697	0.813525		3.00825	2.8583			1.17858		0.717511	2.24996					1.00291	0.957672
0.870749	1.24231		2.15662			0.736343	1.49999		1.32239	2.26022			1.3012		1.67364	1.08669					0.97859	1.46017
0.780375	2.70638		4.35674			0.49399	1.15695		1.57158	0.723383			2.37509		0.73679						1.19532	1.33675
2.26839	0.81518		1.51398			1.59012	1.26505		1.22945	0.871257			1.57624		0.893083	0.745262						1.38227
1.99868	4.15759		3.04917			0.873453			1.25536	2.99445			4.03842		1.65192	0.763765						1.35176
1.32473	1.23662		4.6371			1.25671	2.49889			1.74771			1.04058		0.866612	1.18061					1.15399
3.1907			1.44179			0.849074	1.25898		2.60275	1.2038			0.644045		0.768885	1.01509					2.4088	0.98926
0.717261	0.807916		2.32843			0.775521	0.733778		0.553979	2.55847			0.927694		0.905613	0.966384					1.41535
1.71335	1.29751		3.88847			2.155	2.04217						1.06882		1.68761	0.779658					0.830621	3.41999
1.30061	1.59961		1.49785			0.771138	2.21153		1.34485	1.30926			1.72899		0.962987	1.03531					0.99612	1.30192
0.914119	0.650728		2.24633				0.668565		0.802929				0.858537		0.721023	1.42359					1.15425	1.63512
0.938379	0.902542		3.46508			0.738939	1.50656		1.05711	2.16307			1.9178		1.92628	1.4793					2.06667	1.38422
1.19167	1.00609						0.99643		1.69976						1.5548	1.47493						0.728817
1.28001	1.20251		2.54915			1.10294	0.807601		1.63648	1.96705			1.5407		0.851742	2.22268					1.39384	1.53927
	0.700474		3.03581			1.12623	2.88697		1.32923				1.54811		3.24024	0.777057					1.25277	1.55002
1.53548	0.973232		1.78288			0.440458	2.09547		1.72723	1.38079					1.67443						3.08526	2.27039
1.54103			3.66245			1.36521	0.946868		1.76549	1.02841			1.66866		1.18503	0.720862					1.35058	0.751351
0.870867	2.59555		4.0318			0.746512	1.04175		1.40929	0.599571			2.56232		3.19688	0.732414					1.30428	1.06909
0.736451	1.36149		6.62935			0.692458	3.03557		1.45728				2.62223		1.43373						0.73636
2.09021	1.08302		2.21279			2.80197	0.829529		3.31145	1.40436					1.38847	1.31042						2.09791
2.65215	2.05137		1.82136			0.321679	1.78		1.007	3.44665			2.52759			1.32723						1.32902
1.31352	0.868258		1.76897			1.54198	0.805327		1.83323	1.51736			3.77125		1.6083	1.17742					0.88063	1.56951
1.3626	1.47932		1.61049			0.51875			1.06663	0.965204			1.12959		1.18599	1.20571					1.06502	0.874213
2.42875	4.2212		1.53324			2.39834	0.889222			1.576			1.032		0.893674	1.15886						0.994847
1.49751	1.45942		6.24149			1.98251	2.62319		1.29363				1.84234		2.41193	1.64067					1.10189	2.5717
3.5183	0.712576		3.12937				0.75249		0.847222	1.03539					1.00767	1.08388					2.38236	1.49765
1.16725	1.33916		3.39716			0.709486			0.768906	1.05717			1.85874			1.4408						2.419
2.14606	0.85116					1.58901	0.972536		2.94188				1.05338			3.08758					1.34021	1.71011
1.4206	2.49527		2.53026			0.824035	1.43221		1.07958	1.97665			0.974365		2.00516						0.881992	0.989392
1.55418	1.06502		1.5279			0.552352	1.61411		1.74571						1.99242	1.15131					2.31087	0.779166
2.95178	1.03512					1.39304	1.64852		1.43872	1.08488			2.35103		2.0662	0.773594					1.27181
1.65264	1.8629		2.32862			0.550925	1.6287		1.94618	2.71445			1.46701		1.29272	1.56009					1.55885	0.723745
1.18757	1.43535		1.57778			1.61004	0.902616		0.981892	1.10772			1.21921		1.1014	1.28859					2.5761	1.65975
1.34902	2.39978		2.69656			1.42364			2.36975	2.39134			1.19277		0.932491	2.09422					3.24994	1.36407
1.83218	2.67767		3.4172			2.46649	0.895445		0.910658	1.78312			1.32572		0.662666	1.87788					1.52515	1.26816
1.98324	0.853581		4.71138			1.14605	1.47928		1.39321						1.54937	0.764724					1.7593	1.34312
3.88337	0.703402		3.21028			0.678068	1.93382		1.11846	2.03161			2.56295		2.74453	1.29741					1.06115	1.28722
1.27255	0.987932		3.15123			0.807608	1.08204		1.33532	1.81581			1.19455		0.895202	1.26215						0.843402
0.855254	2.86581		1.98302				1.33543		1.26478	0.95017			0.984467		1.57648	2.90944					1.69364	2.29539
0.990932	0.762381		1.24128			0.762022	3.36475		2.14397	2.91507			2.01212		1.28937	1.34587					0.923398	0.764573
2.26282	1.72402		2.8442			0.885166	1.0268		1.95714				0.884774		1.75751	0.942935					2.85516	0.73816
1.4638	3.93499		4.18054			0.776918	2.09747		1.126	1.46983			1.86492		0.7215	2.01532					2.03215	0.898698
1.3172	2.15697		2.0331			0.414874	0.91928			3.15575			0.987444		1.76025	0.852684					2.72808	2.67066
0.855771	2.69244		2.24723			0.543267	2.59554		0.925861	2.26786			3.91594		1.26373	0.892655					3.05326	1.57428
1.44799	0.687886		6.41934			2.04127			0.93292				1.07431		1.10346						1.00525	0.816982
1.69113	0.78117					0.72146	1.58978		1.41801	2.14239			2.10408		0.842991	2.15921					2.76238	0.777295
1.75829			2.17446				0.860913		0.76957				3.19413			2.36645					2.27283	2.78002
0.914957	0.906566		3.40223			0.469244	0.684178		2.9127	1.14035					2.23257	1.48969					1.67917	0.790028
1.27882	2.63283		1.11043			0.955716			1.05818	1.98974					1.29175						1.30965
0.957769	2.42489		3.20936			1.85007	1.39817		0.82084	1.38236			2.06448		2.07787	1.43507
1.42095	1.51949		1.87478			0.503644	1.03791		1.21571	2.80706			1.55008			2.36139					1.03352	1.80223
1.91539	1.07874		1.61732				0.743653		3.12429	1.42021			2.6827			1.03972						1.22872
0.900391	1.11267		1.57117			1.39636	1.00202		1.70552	1.1179			1.1041		2.18762	1.18465					2.74637	1.53673
0.967335	1.36487		2.20725				1.29559		1.02231				1.68878		1.54722	1.23616					0.970968
2.41487	3.20474		5.16575			0.534344	1.45535		1.28737	0.893666			2.30594		1.54933	1.68245					1.63151
2.48802	0.939181		1.94215			1.57094	0.930308		1.38143	0.808268					1.26375						0.789217	1.46254
	2.37085		2.32495			1.25558	1.32183		1.42005	1.80333											1.1114	3.47862
3.11222	1.79078		3.75328			0.446635	1.28102		1.26884	2.17608					1.17133	1.17931					0.781874	0.763895
1.15607	1.15514		1.05138			1.08609	1.38853		0.843922	1.22981			3.57758		1.48152	1.49413					2.93519	1.38414
2.0387	3.41767		1.25959			0.40195	0.921486		1.30947	2.35546			0.880997		1.70516	0.966736					0.996847	0.885859
1.88399	1.47383		1.50857			0.675143	2.04835		1.82114	1.11215						0.703693					0.815417
1.32842	1.53809		2.26743			0.801623	3.26173		1.35352	0.734718			3.63036								1.67361
1.08507	3.0139		2.64156			0.758469	2.63127		1.92782	3.14987			2.38361		0.983971	2.01315					2.21667	0.68372
1.57866	2.32472		3.61297				1.26415		1.11212				3.41098		0.874901	0.790588					1.99313	2.45717
	0.715634		2.05023			1.40839	0.730722								1.09078	0.772993					3.23492	0.68389
0.87933	1.46754		3.73335			0.829486	0.850668		1.21479	0.701667			1.07675		0.900118	1.53988					1.09531	0.94452
1.67147	3.41675					0.46115	0.745879		0.706861	0.787624					0.627898	0.891351					0.91617	1.2596
1.19006	1.24808					1.03337	2.09264		1.1529	3.15513					1.29681						2.83715	1.91708
1.85274	0.818017		1.39042			1.1132	1.2531		1.00235	0.915959					0.580817	2.91666					1.64555	1.56428
1.00798	1.2439		4.55304				1.50663		0.975596	1.30024					0.849313	1.67872						1.93782
1.06572	1.00606		1.74192			0.977881	0.768075		2.60745	1.15185					1.06448	1.80167					1.50457
0.856264	1.0738					1.1265	2.52409		1.15478	1.67356					2.05694	0.813244					2.56771
0.783908	0.927666		1.8203			0.715632	0.980623		1.15148	3.21142					2.73926	2.83143					1.35569	0.839481
	2.00183		1.14565			1.0031	2.13878		1.50062	3.03865					0.682498	0.864112						1.27315
2.18746	1.11545		4.12557			1.03838	0.738902		2.15117	1.3041					1.49708	1.47269					0.866619	1.83062
1.0834			1.44548			1.0703	1.33436								2.9258	2.50815					0.722666	2.37439
1.68064	0.932211		2.52013			2.05257	0.928598		2.1819	1.43789					0.906085	1.14663					0.663808	0.810673
3.04547	1.26427		5.57783			0.594023	0.850484			1.49274					2.05852	0.756447					1.45878	1.03247
0.810529	2.14955		2.56056			0.47051	1.03977		2.32628	1.17558					0.923531	0.870658					0.716093	0.843681
2.59072						0.479258			1.02918	1.24489					1.67829	2.7562					2.18871	1.1327
1.40578	1.39364		2.59772			1.0475	1.50279		2.37501	1.15518					1.32356	1.22542						1.66391
0.926089	0.694502		2.79914			0.849212	0.724814		2.04743	0.960954					2.4818	1.19987					0.772955	2.39738
1.32018	5.11568		3.05287			0.589587	2.71181		1.17283	1.26982					2.75143	0.79048					1.6598	0.882961
1.75734	2.47466		3.27386			2.00055	0.894085		1.05307	2.16137					1.67874	3.17915					1.45312
2.17048	2.21362		5.81456			1.36368	1.89576		1.86186	0.988199					0.904537	1.63548					1.11478	1.05237
0.706041	2.07689		1.66947			1.33932			1.76672						1.23644	0.933187					1.55198	1.9047
1.6448			4.58739			0.544736	2.96707		0.97197	1.38868					2.7809	1.90043					2.88724	0.955867
2.35648	0.707189		1.43781			0.838165			1.81282	1.26433					0.973839	1.78231					0.791367	1.58322
1.3615	0.753436		2.71405			2.77768	1.30464		2.66507	1.47871					1.52848	2.17553						0.923455
1.61193	3.53025		5.10511			1.4131	0.899199		1.80972	0.995457					2.69555	2.67506					1.19171	1.36614
1.56969	0.633251					0.556059	1.64694			1.33061					0.902208	2.03819					3.0554	2.87844
2.40332	1.0836		3.48524			2.49021	1.27702		0.903614	1.41028					0.653664	3.29364					1.23948	2.38801
2.23839	1.11767					0.481213			1.42317	1.77203					0.905176	1.18351					2.36571
1.5415	3.14666		2.05162			1.0333	2.78393		2.55975	1.15225					0.97599						3.09647	1.10547
1.3116	2.34002		2.5571			0.777049	1.23657		1.1339	0.859058						1.00264					0.833053	1.07284
1.06555	1.29018						0.883696		1.78026	1.14355					0.737967	3.06708						1.45593
1.86028	0.964864		1.95301				3.32415		1.56582	2.80859					2.12658	0.816244
1.09889	3.63729		1.83633			1.57467	0.773096			1.83114					2.26721	1.41807					1.52165	1.71885
	3.0039		1.83696			0.474743	1.77636		1.09144	1.11373					1.14546	0.669096					0.961139	1.53112
2.18392	1.71749		3.55913			1.02486	1.75312		1.19647	2.17601					1.25417	0.955385						1.25853
1.86342	2.46376		2.92473			2.34145	1.24463		1.39933	3.41086						3.39545					2.43046	0.974401
1.19354	1.09379					0.30894	3.65645		1.96479	1.34888					1.2719	1.20608					1.29533	1.63962
1.20176	4.93402		3.81681			1.38684	1.10545		0.863271	1.28304					1.19783	0.909884					1.28789	2.90078
0.874939	0.858255		3.46099				1.27243		1.29913	1.40863					1.6545	1.86315					1.86431	1.10445
1.06514	1.38712		1.56761				1.18642		0.744658	2.40051					1.18822	1.00169					1.16558	1.08925
1.5713	1.19007					0.827409	1.20087		1.823							1.53997					0.584803
1.16042	4.30684		1.60899			1.40745	1.6993		1.08946	3.35499					0.759237	1.26885					2.98909	1.01627
1.0995	0.960269		2.57324			0.949112	1.50529		1.3006	0.993792						1.74603					1.33613	0.645476
3.14011	0.761388					0.3995	1.13753			2.10901					0.715516	3.10208					1.16192	2.35798
1.3015	2.63073		2.62006			1.06231	0.768421		2.07811	0.864204					0.756499						1.86542	1.20869
1.42969						1.29903	2.72187		1.26759	1.29527					0.995211	1.658					1.45651	0.871238
1.11765			3.12977			1.27986	2.43624		3.28817	0.754981					2.32985	1.11944
2.87012	4.3339		3.39639			0.448225	2.22423		1.6265						1.13147	1.15412					0.898311	1.47615
1.14047	2.99574		4.99506			0.629543	0.99048		0.774818	1.29363					1.75168	1.0228					1.55415	2.25783
1.75049	1.34067		5.0603			1.20706	1.18246		1.49076	1.34549						0.763123					1.80676	2.28332
0.95308	1.11525		1.91931			0.552731	2.76091		2.26863						1.22474	1.92461					2.90459
2.16202	1.96189		6.20739			0.40488	1.36453		2.33697	1.27878					1.22253						2.11566	0.945303
1.40974			1.22957			0.426129	1.10249		0.8889	0.804663					0.848832							1.10355
	1.42549		1.65304			1.20575	1.57311		1.42485	2.48589						1.49455						1.18891
2.69181	0.967798		2.09911			0.936861	0.701174		1.18056	1.64481					1.30183	2.24521						2.06945
1.05549	0.983189		3.09803			1.8366	1.64218		1.55786	2.3845					2.62415	1.53684						2.04497
1.11175	1.80246		1.5481			0.535462			2.04158	3.64906					3.23444	1.08669
0.93982	1.73964		2.53371			2.70257			2.32999						0.913086	0.973025						1.07645
1.1267	0.888396		2.65953			0.833513	3.10613		1.00442	1.5923					1.28072							3.26214
2.84591	1.26439		1.42488			0.655569	1.56757		0.984523	1.60998					1.14885	1.22933						1.0036
3.0801	2.64264		1.50487				2.12095		1.22214	1.93451					1.27833	1.08262						2.64713
0.818681	0.555131		4.16285				0.757094		2.09178	1.34565					0.82575	1.14394						1.9371
1.18642	2.32907		4.5316						1.03856						1.29052	0.788415
1.5298	2.0188		1.52536						0.847187	1.42899					2.1038	1.56985						1.2329
2.54563	1.25944		3.54335				1.50826			1.28831					2.38147	1.86968						0.788403
1.15216	2.20875						1.60779		1.27426	3.96439					1.69631							2.2245
1.01494	0.899706		1.68542				1.93327		2.85364	2.80557					2.12286	2.57472						1.47123
0.985985	1.43851		2.29903				3.48067		2.31184	0.980657					1.05493	1.46676						1.9752
1.72502	4.98984								1.3693	3.99961					0.935764	1.00654						2.80903
1.04443	1.13024		1.96238						0.986347	1.08873						1.33868						2.49936
1.20074	4.34973		1.77173						2.45252	2.19317					0.818741	1.53165						2.02036
3.2616	2.48145		1.68836						2.41132	2.32323					0.865677							1.56882
2.21792			1.49684												2.64059	1.23088						1.34655
1.62949			2.42002						1.70474						1.00712	1.45114						1.41102
3.09745			4.31002						1.18594	2.06182					0.724905	1.21782						0.577693
0.754361	1.77795		1.26865						0.954151	1.32907					1.48777							1.61369
2.41464			4.65132							2.17246					2.85478	0.691097						0.699088
0.942777	1.16614		5.97251						0.855963	1.76854					2.30775	2.17111						1.09627
3.14506	1.76221		2.68759						2.46135	1.54845					0.930632							3.47238
2.45855	0.864706		2.75196						1.718	2.77496					1.18602	2.29918						0.693916
3.07051	2.38221		2.86571						1.28757	3.87966					2.289							0.925014
1.11061	3.39866		5.93703						1.05978						1.05037							2.01123
0.944647	1.09869		1.48863							3.01033					0.641008	1.57783						0.822639
1.35984	3.87955		1.83035						2.14455	0.848881					1.11477	0.898387
1.48544	3.0746		1.99732						1.2663						1.40782	0.884947						0.966605
1.9826			5.19534							1.35511					1.36876							1.78746
1.37552	1.48545		1.59223						1.51532	3.63915					1.35906							1.26721
0.960242	1.5788		4.60439						1.59907	1.35351					2.72843							1.27767
0.911434	1.92444		1.42316						1.23726													0.617915
1.09789	1.00283								1.05811						1.1694							0.75871
0.902687	1.32236		2.37084						1.37627						2.33191							1.46083
2.09225	1.63795		1.43477						1.58108						1.14671							1.01755
1.63683	3.59543		3.98181						0.794151						1.06246							1.29677
1.80147	2.07192		3.22628						1.0485						3.01321							2.80263
3.61406	1.08635		3.76188						1.14458						1.23998							2.53598
0.825769	1.04386		2.13448						1.3612						0.763061							0.948807
2.6845	1.86329		1.72656												2.01614
1.36827	1.64997		4.99131												0.976822							1.24086
1.87903	1.29297		1.4112						1.52502
2.16567	1.46051		1.63539												1.13742							1.32088
2.54975	2.73525		1.98399						3.20209						2.55272
2.11408	1.47634		1.14177						1.49766						2.0447							0.855984
1.13292	1.49168		1.81143						1.52899						1.71831
0.964275	0.81167		1.88412						1.46318						0.826277							1.26575
3.51385	1.91911		2.0915						1.34501													1.77557
0.8934	3.99275		2.09159						0.966601						1.10295							1.02657
1.17935	1.062		2.91792												1.14921
1.01131	1.79586		1.26056						1.50022						1.30462							1.43656
1.02904	2.77909		2.67062						1.83657						0.919618							0.707631
1.03457	2.00462		2.50314																			1.3519
	1.51007		5.73548						1.10506						1.43112							2.04287
1.70057	0.92429		4.41062						1.35664						0.657293							0.95943
2.12248	1.02842		1.29523						0.919103						2.10274							1.56477
0.754594			4.03045						0.794552						1.44395							2.98879
0.731719	1.51606		1.89225						3.33854													2.32656
1.45171	1.36486		6.32247						0.95527						1.41231
2.64243			3.39203						1.29517						2.62176							1.52155
2.46669	2.83486		3.97923						0.885128						0.823852							0.652142
2.07657	4.31692		1.748						1.13892						1.37083							1.16397
1.01917	0.72187		1.59403						1.18965						1.20399
1.00164	2.72588		1.64334						0.523058						1.59873
	1.78478		1.81469						0.780305						1.00472
0.891106	0.84952		1.84344						1.99502						1.24787							0.688064
3.48994	1.24953								1.88038						0.860154							1.20939
0.938386	1.25459		1.86939												3.06273							1.57646
3.6819	1.51465		1.3963						0.994852													0.816283
	1.13376		2.36096						2.43411						1.60231							1.57893
0.710429	0.741313		2.68281						1.12841
2.29211	1.36938		1.35166						1.211						0.601691							1.20798
3.1505	0.625884		1.53589						0.813654													1.51493
1.47486	1.03007		2.17437						1.36948													1.03944
1.74939	0.747433								1.11616						1.10356							0.795214
3.27712			6.02822												0.705554							0.877612
1.26461	1.45985		1.8434						0.597596						1.73371							0.87569
0.956669									1.74285						0.817451							0.734317
0.757969	4.33032														1.01776							1.70411
1.05904	1.43912								1.59537													1.19959
0.73874	1.90398								0.795552													0.641167
2.22629	0.762289								0.767403													2.6806
0.892457	1.2434								0.701235													0.573797
1.3547	0.696018																					2.28481
1.40215	0.702261								2.15654													0.938072
0.738134	3.59632								0.632475
1.5929									1.48166													1.55341
2.58414	2.60353								0.884755													0.929049
1.12683	0.682657								1.97536													1.94008
1.04704	4.30924								1.42363													1.55382
0.888304									1.06028													0.716605
1.3657	1.44405								2.26684													2.08143
1.15579									1.63219													0.886778
1.72887	0.770229								3.14812													1.34115
2.74553	0.813454								1.125													0.981088
1.18286	0.670159								1.71409													2.52702
2.10693	1.01139								2.60747
1.11606	1.07566								1.38548													1.35751
1.18786	2.12429																					1.22773
	1.7678																					1.92836
1.63458	0.705142								3.18804													1.24873
3.34441	1.80202								1.71736													2.7851
1.20906	0.777732								1.30409													0.861015
1.67021	1.29447								1.08138													1.89074
1.20202	0.699444								0.628797
2.25337	0.681026																					2.70902
1.10225	0.815555								1.32665													0.888399
1.91738	2.8819								2.11176													1.49115
0.817801	1.16013								2.74192													0.650758
1.37846									0.647917													2.47943
0.880242																						1.00207
2.64744									0.936576													2.48678
1.67128									1.24775													0.947417
0.792072									1.29145													1.66095
3.13826									0.922304													2.00921
0.887141									1.2378
1.17162									3.32204
3.1381									2.17821
2.62747									1.13093
1.19237									2.26087
									0.924425
3.19346									0.836008
0.920711									0.909372
									0.799463
0.867045									1.28893
1.53067									1.52442
1.98938									0.945608
1.91343									2.18338
0.809102									0.973171
1.41098									0.99113
2.26682									1.81736
0.954198									1.48485
1.50397									1.87858
									2.41913
1.43932									1.99488
2.37977									0.952676
1.32537									2.08138
2.00963									0.630215
1.24967									0.918385
1.07575									1.67663
0.741596									1.67651
1.34034									0.992519
2.34207									1.24029
1.64572									1.11861
3.14288									1.20555
1.80253									0.849102
1.92166									0.94951
1.02664									1.99854
3.46449									1.03555
0.960145									1.19501
1.78923									1.02124
0.926033									1.30922
1.85489									1.53687
3.72144									1.01759
0.751983									1.33738
1.86161									0.81396
1.48115									1.88591
2.32476									1.04635
1.47565									0.966124
1.66922									3.21221
1.08936									1.1833
1.31265									1.44705
1.16405									1.88699
1.7624									0.80659
2.25314									0.731012
1.28993									1.28589
1.573									3.29021
4.05631
0.745059									1.18676
2.64621									2.00428
1.87817									1.57338
									0.968383
1.44509									0.846015
0.919354									0.827843
1.8728
2.21115									1.43559
0.758868									1.3078
1.10673									0.766953
0.908433									1.34498
1.95463									1.95271
0.840056
1.85161									1.1588
1.09226									2.12267
3.48568									0.86197
0.69012									2.57246
1.31532									0.603036
1.28918									1.55914
2.40068									1.00454
2.02011									2.18015
3.46853									2.23598
0.907079									2.54881
3.53785									0.947264
1.31043									0.953006
1.38061									1.45271
1.84704									2.01725
0.801288									0.930892
1.08667									1.08592
2.05962									1.52269
0.988473									0.782022
0.724668									2.46698
2.85927									1.3677
1.16771									0.764079
									1.48281
									2.50334
1.4982									1.14274
1.45949									1.11713
1.48327									1.03362
1.34615									1.21975
2.6724									1.09179
2.31036									1.21333
0.821695									0.89891
3.8228									0.968182
0.887929									1.26233
1.77788									0.858892
1.01594									0.769815
1.53468									2.07893
0.790667									0.589656
1.48954									1.09904
1.43073
2.68333									1.46207
1.32163									1.00527
2.67036									1.31659
2.74357									1.93004
1.94415									1.14273
3.49075
2.03295									1.82082
									1.05546
1.00954									1.10359
2.4649									1.37948
2.23895									0.871173
2.33152									1.18866
0.775537									1.41768
2.50618									1.07237
1.94177									1.63441
1.05689									0.930327
1.66808									1.12886
									1.24677
2.29749									2.2896
									1.27485
1.62387									0.758502
2.05404									1.18725
0.991545									0.709921
1.02394									0.834757
0.870992									1.11144
2.85279									2.25885
									1.33388
1.57508									0.971321
1.10612									1.68893
3.49882									2.93277
0.876249									2.66999
1.05008
1.93088									1.80952
1.28686									1.66137
0.761789									2.98436
1.39968									0.913532
1.78577									1.36198
2.1304									1.67467
1.32808									2.52382
									1.09118
1.16764
0.830447
1.41742
1.10375
2.67106
2.12436
1.34253
3.35976
1.01898
2.14618
1.64169
0.746395
1.71474
1.97957
0.764026
0.991784
2.69703
1.46555
3.56642
1.9338
1.22363
1.05183
3.98671
1.59216
0.700855
2.67977
1.34927
2.66288
1.17744
1.86156
0.873399
3.41763
3.76609
1.17329
0.938666
2.47805
1.0654
2.43462
2.71894
1.82732
3.76195
0.887444
1.87621
1.20937
0.851925
1.10424
2.53298
1.94386
1.64761
1.50914
1.31703
3.34129
1.54966
1.93807
0.926891
0.98033
2.18556
1.11135
0.691109
1.53769
2.12967
0.860838
1.13495
3.26459
0.916391
2.45845
2.3547
3.03233
0.68405
3.4647
1.59072
0.737895
1.30968
1.22704
0.938668
1.17001
3.69303
1.3704
1.31719
1.33748
2.51765
1.9304
1.14121
1.80999
2.47499
0.925994
1.79384
0.770632
0.966939
3.44426
1.25149
0.931677
1.21085
0.972643
3.01365
1.21036
0.984864
2.29095
2.45229
1.71037
3.26141
1.05023
0.918467
1.39279
1.89632
3.50835
0.772878
0.813629
2.05194
1.12119
0.943172
1.56886

## Sheet: Figure 3D
Veh-0min	Tg-0min	HF-0min	3610-0min	0357-0min		Veh-5min	Tg-5min	HF-5min	3610-5min	0357-5min		Veh-10min	Tg-10min	HF-10min	3610-10min	0357-10min		Veh-15min	Tg-15min	HF-15min	3610-15min	0357-15min
0.524792
0.435654	0.521986	0.550369		0		0.823337						0.513514						0.967885
0.570645	0.672524	0.680166	0.53846	0.678188		0.483523	0.623245	0.640385	0.659833	0.556078		0.86009	0.775719	0.90678		0.547288		0.877468	0.544919	0.823188	0.752159	0.787245
0.289313	0.525806	0.34325	0.527556	0.668774		0.773144	0.652082	0.769674	0.397466	0.756614		0.63069	0.79312	0.845469	0.829229	0.618471		0.558074	0.686032	0.781707	0.854163	0.905276
0.352618	0.460804	0.594265	0.465797	0.441678		0.86239	0.824308	0.586417	0.576233	0.730051		0.890015	0.307581	0.49841	0.736779	0.557917		0.726626	0.750953	0.565275	0.663659	0.92355
0.637179	0.507061	0.469163	0.488151	0.331871		0.741163	0.672893	0.650936	0.554339	0.655665		0.873603	0.493104	0.729301	0.875055	0.60645		0.299845	0.715742	0.469359	0.747086	0.855854
0.561235	0.46186	0.480751	0.632297	0.536744		0.699568	0.780218	0.795989	0.722953	0.476692		0.728936	0.505903	0.652498	0.555954	0.316862		0.779036	0.86718	0.580604	0.795441	0.924869
0.860902	0.558503	0.88698	0.517297	0.48886		0.779183	0.501458	0.359818	0.776186	0.66512		0.739603	0.752538	0.819153	0.751129	0.916257		0.934139	0.744397	0.745036	0.821357	0.888087
0.474484	0.48238	0.544127	0.48505	0.518145		0.840412	0.53408	0.839798	0.421724	0.66864		0.937414	0.257857	0.549931	0.805303	0.83313		0.88711	0.779291	0.531393	0.798022	0.699588
0.789485	0.588658	0.465626	0.53879	0.710466		0.662093	0.766368	0.863875	0.73137	0.596486		0.634826	0.59	0.281718	0.825088	0.685532		0.589504	0.962628	0.436347	0.388807	0.656544
0.781278	0.455634	0.619132	0.516473	0.6884		0.86608	0.486164	0.671772	0.585934	0.739506		0.932505	0.426294	0.716867	0.535409	0.703299		0.870349	0.365279	0.677872	0.72916	0.649173
0.577919	0.380491	0.671408	0.598972	0.509038		0.723916	0.7153	0.788133	0.550496	0.640601		0.811572	0.80408	0.682042	0.754518	0.647476		0.83092	0.772197	0.540339	0.629721	0.34346
0.586559	0.640155	0.706209	0.635019	0.65328		0.935809	0.749903	0.621934	0.601584	0.518984		0.694426	0.660746	0.751648	0.606054	0.613726		0.686007	0.445989	0.652641	0.759227	0.655868
0.624244	0.439377	0.584266	0.470513	0.630001		0.690004	0.667759	0.6618	0.695615	0.327477		0.942638	0.588651	0.692104	0.66613	0.789045		0.88545	0.654992	0.593978	0.870196	0.541759
0.594119	0.577062	0.702569	0.620346	0.697147		0.959029	0.587321	0.599348	0.63626	0.706753		0.707776	0.390585	0.306113	0.718565	0.575542		0.894749	0.848479	0.721651	0.828486	0.802091
0.588943	0.659438	0.466327	0.294667	0.51187		0.867779	0.705117	0.555452	0.779313	0.749453		0.555926	0.587102	0.586264	0.438024	0.562598		0.840018	0.648046	0.495547	0.356759	0.902327
0.568007	0.614434	0.322253	0.369771	0.520362		0.598359	0.643761	0.665825	0.705953	0.848722		0.745993	0.65821	0.297249	0.921117	0.866126		0.836246	0.657818	0.57101	0.552032	0.774977
0.737584	0.587655	0.589189	0.375687	0.497114		0.706467	0.516456	0.604782	0.270223	0.571913		0.880135	0.6508	0.48108	0.670279	0.80095		0.782105	0.854652	0.440048	0.906581	0.47659
0.69126	0.428847	0.770112	0.540164	0.661035		0.828724	0.666081	0.628445	0.780048	0.861739		0.492923	0.841794	0.645984	0.682799	0.583625		0.906084	0.855679	0.72578	0.623491	0.411286
0.846509	0.239182	0.241549	0.691279	0.555449		0.614259	0.705006	0.681115	0.592559	0.551905		0.672549	0.462709	0.768289	0.381673	0.538444		0.800696	0.632646	0.786822	0.623118	0.676256
0.552522	0.521549	0.420196	0.364832	0.779652		0.749293	0.56138	0.370707	0.894553	0.868472		0.785045	0.489731	0.667277	0.585218	0.803573		0.788007	0.348345	0.500261	0.808074	0.832619
0.763213	0.568162	0.721319	0.631707	0.726404		0.852665	0.650869	0.563147	0.355995	0.79423		0.812761	0.651648	0.473446	0.914928	0.588275		0.346135	0.539125	0.91184	0.789535	0.726028
0.781501	0.616087	0.628084	0.58998	0.680659		0.674968	0.668597	0.831982	0.438303	0.742646		0.481462	0.636044	0.668772	0.294652	0.804319		0.921445	0.673243	0.26938	0.653821	0.739362
0.53107	0.446519	0.611373	0.66493	0.381248		0.609618	0.790277	0.543989	0.625381	0.575227		0.80712	0.648864	0.513665	0.488451	0.771134		0.820974	0.818648	0.475482	0.873301	0.587968
0.752858	0.496305	0.582926	0.485115	0.583322		0.626119	0.586955	0.703256	0.620098	0.647155		0.5267	0.623711	0.797953	0.527902	0.60419		0.733647	0.634193	0.605261	0.592055	0.759506
0.488813	0.687315	0.702229	0.52064	0.685363		0.896168	0.709142	0.789161	0.438748	0.793272		0.552917	0.773522	0.493614	0.638755	0.470435		0.908212	0.513403	0.207035	0.590856	0.823429
0.744436	0.510665	0.673335	0.472672	0.536522		0.846281	0.449738	0.720445	0.597091	0.753893		0.75099	0.415161	0.394308	0.659523	0.724535		0.87038	0.844867	0.446449	0.687488	0.548389
0.541583	0.37098	0.534644	0.714954	0.412964		0.852699	0.541099	0.881939	0.83737	0.528554		0.684529	0.775016	0.753782	0.732231	0.762074		0.927776	0.806409	0.583506	0.68922	0.681332
0.684973	0.509744	0.552107	0.46586	0.591217		0.427644	0.487696	0.697237	0.620045	0.702398		0.851964	0.587273	0.586525	0.347103	0.711475		0.861377	0.57912	0.609435	0.631325	0.740098
0.49983	0.732441	0.693351	0.569711	0.513674		0.95662	0.453975	0.394839	0.401001	0.541846		0.659663	0.706552	0.780781	0.838877	0.870058		0.557753	0.82415	0.32738	0.892494	0.692839
0.670983	0.486735	0.607289	0.66222	0.689981		0.86956	0.74946	0.590894	0.587709	0.596006		0.830353	0.806703	0.482787	0.738321	0.863162		0.960872	0.632726	0.691788	0.437704	0.467622
0.781404	0.215595	0.53917	0.258463	0.656359		0.664953	0.898018	0.730636	0.793494	0.701843		0.604495	0.890749	0.487477	0.728928	0.867818		0.877754	0.542636	0.621577	0.792001	0.903303
0.633604	0.416494	0.467725	0.687507	0.70298		0.697494	0.204299	0.643829	0.478549	0.888984		0.39661	0.644351	0.381109	0.814276	0.580056		0.635132	0.55498	0.672315	0.702164	0.656899
0.72207	0.523513	0.312965	0.410003	0.225177		0.674394	0.787998	0.544607	0.561949	0.798145		0.794233	0.567148	0.304376	0.902342	0.650041		0.895217	0.513749	0.422798	0.947875	0.668587
0.53701	0.476052	0.55748	0.523276	0.194558		0.703443	0.815499	0.532906	0.758107	0.336974		0.787201	0.290421	0.750329	0.613837	0.55455		0.947584	0.727285	0.370604	0.829844	0.835809
0.695372	0.300485	0.653173	0.358365	0.263049		0.746351	0.491677	0.781936	0.885067	0.729073		0.709441	0.797513	0.816993	0.901951	0.75438		0.879322	0.525149	0.61851	0.758089	0.723237
0.797258	0.628347	0.429448	0.57589	0.433072		0.707789	0.60201	0.846514	0.677986	0.817264		0.646567	0.887099	0.725138	0.389418	0.74229		0.585863	0.547499	0.54047	0.543809	0.667296
0.739824	0.447329	0.331401	0.528725	0.482518		0.85654	0.794763	0.461701	0.627097	0.653032		0.829088	0.719408	0.657983	0.637045	0.467413		0.872943	0.445767	0.420975	0.833687	0.663536
0.660377	0.412057	0.661892	0.288455	0.757682		0.775678	0.447885	0.46915	0.753611	0.865512		0.861907	0.538272	0.649133	0.423032	0.438406		0.727538	0.474272	0.793985	0.599298	0.739367
0.732266	0.638372	0.597889	0.339056	0.617848		0.754679	0.668366	0.571423	0.774033	0.747324		0.695517	0.667224	0.774161	0.744214	0.600699		0.785251	0.529553	0.52454	0.675677	0.549666
0.473618	0.447274	0.539874	0.428034	0.275487		0.764949	0.693781	0.622437	0.73098	0.644693		0.84291	0.692306	0.701238	0.527576	0.50561		0.690824	0.506471	0.651959	0.564394	0.551878
0.497799	0.626406	0.591875	0.556163	0.580405		0.621503	0.682284	0.522294	0.482403	0.897139		0.536632	0.723613	0.644735	0.703545	0.837999		0.727245	0.785609	0.667657	0.571972	0.460764
0.723507	0.385431	0.512288	0.235612	0.592934		0.812419	0.869129	0.551031	0.299322	0.636861		0.716404	0.429585	0.842229	0.634542	0.831341		0.938905	0.669264	0.615398	0.83129	0.936225
0.430382	0.607116	0.779193	0.686956	0.261728		0.727918	0.722098	0.68986	0.726789	0.611534		0.897582	0.620856	0.797304	0.347711	0.701029		0.827255	0.777202	0.879316	0.437353	0.784462
0.561554	0.200811	0.527337	0.561125	0.628849		0.758596	0.69416	0.738373	0.803427	0.663665		0.706201	0.475769	0.348714	0.533691	0.778845		0.891149	0.820744	0.547351	0.759997	0.75634
0.827865	0.571353	0.178582	0.635024	0.774069		0.432182	0.596242	0.887145	0.446684	0.535283		0.752818	0.498203	0.694731	0.576966	0.659286		0.730199	0.349002	0.757994	0.746336	0.64429
0.834973	0.512898	0.789651	0.484586	0.558901		0.712816	0.375284	0.884808	0.745313	0.538065		0.917734	0.701919	0.797	0.656604	0.290375		0.799837	0.159775	0.722962	0.56704	0.516531
0.533813	0.71126	0.324218	0.570687	0.268331		0.637403	0.633411	0.347396	0.716982	0.454214		0.416106	0.510873	0.786851	0.666675	0.627941		0.840543	0.74537	0.510591	0.287849	0.788684
0.671015	0.575106	0.55308	0.410035	0.625836		0.900485	0.478108	0.821287	0.620196	0.251817		0.672399	0.524307	0.717476	0.531784	0.647301		0.836351	0.704136	0.20891	0.710504	0.845457
0.710592	0.364434	0.382806	0.668802	0.211178		0.571542	0.652202	0.422626	0.697968	0.614205		0.857053	0.655832	0.712819	0.78739	0.531393		0.591785	0.749995	0.713448	0.753508	0.745019
0.849179	0.673726	0.506105	0.524161	0.720749		0.692834	0.852124	0.907762	0.625505	0.473541		0.914669	0.470169	0.38112	0.821631	0.739682		0.882407	0.293014	0.578131	0.52128	0.564953
0.321419	0.550725	0.571762	0.556239	0.556603		0.664565	0.691712	0.77036	0.66922	0.471643		0.664104	0.729893	0.704046	0.503963	0.286263		0.760467	0.628439	0.383924	0.739883	0.576192
0.812877	0.605037	0.654399	0.562007	0.722862		0.427757	0.675897	0.791652	0.777796	0.408826		0.782863	0.588821	0.887389	0.59521	0.537676		0.809961	0.470012	0.368975	0.546437	0.30683
0.794968	0.310614	0.452531	0.431529	0.586893		0.337859	0.556494	0.855039	0.690303	0.8762		0.849515	0.428644	0.194366	0.708322	0.693529		0.645679	0.544165	0.55841	0.764612	0.548409
0.776784	0.462571	0.663739	0.419609	0.479572		0.528929	0.708088	0.824886	0.704299	0.740734		0.722758	0.449892	0.596441	0.543172	0.644081		0.761241	0.593829	0.607742	0.637301	0.337458
0.613177	0.406946	0.364362	0.43844	0.594363		0.600963	0.488944	0.501141	0.529159	0.781189		0.732817	0.872883	0.677074	0.40897	0.635863		0.721165	0.524421	0.344914	0.758532	0.528692
0.678113	0.747945	0.649088	0.620038	0.661622		0.769872	0.325397	0.705998	0.834517	0.683469		0.937398	0.443799	0.860836	0.578141	0.707773		0.949261	0.694614	0.504547	0.644065	0.532941
0.895446	0.61448	0.272368	0.281357	0.628985		0.369606	0.65	0.566888	0.560455	0.640262		0.616798	0.562474	0.836857	0.950799	0.670104		0.957621	0.517916	0.389501	0.654575	0.736881
0.659058	0.47224	0.649197	0.544525	0.667425		0.829402	0.723534	0.471763	0.55627	0.685442		0.920627	0.5415	0.634459	0.510661	0.686334		0.897551	0.418701	0.734425	0.313137	0.524859
0.821168	0.361323	0.760671	0.266263	0.474978		0.85766	0.820059	0.282988	0.563146	0.726599		0.452118	0.905448	0.606011	0.785044	0.913719		0.66584	0.470924	0.354563	0.659712	0.569151
0.805557	0.322663	0.611917	0.49835	0.534176		0.950259	0.869586	0.70871	0.726983	0.381704		0.897198	0.664549	0.731325	0.659585	0.628473		0.890398	0.813837	0.829849	0.682209	0.826533
0.386289	0.543326	0.758773	0.551883	0.618575		0.395334	0.755177	0.848253	0.846016	0.66598		0.48508	0.428736	0.855256	0.686755	0.897099		0.313461	0.510985	0.763798	0.793808	0.713983
0.435626	0.684757	0.247928	0.26174	0.25866		0.671146	0.686216	0.384882	0.700593	0.696278		0.475768	0.186626	0.75251	0.648552	0.790348		0.539308	0.572626	0.482969	0.609845	0.879396
0.735113	0.711994	0.457304	0.374476	0.638644		0.646781	0.482834	0.831077	0.586096	0.755294		0.93634	0.643536	0.826457	0.635974	0.606696		0.683138	0.548427	0.633941	0.772445	0.70621
0.40277	0.332817	0.65564	0.745599	0.295333		0.665093	0.495226	0.72734	0.61862	0.605707		0.708154	0.624842	0.823361	0.656352	0.483884		0.919704	0.7767	0.796485	0.530053	0.740377
0.739369	0.452138	0.49855	0.463686	0.735326		0.685276	0.853944	0.528828	0.541636	0.655964		0.944886	0.613631	0.920619	0.492952	0.503135		0.783573	0.886637	0.709054	0.803225	0.609619
0.470946	0.799003	0.534709	0.287676	0.421203		0.514846	0.828001	0.654301	0.566288	0.681937		0.630725	0.47015	0.655846	0.609003	0.726625		0.560967	0.748086	0.342699	0.695698	0.369828
0.618179	0.482081	0.58317	0.559776	0.285029		0.740896	0.671595	0.74185	0.712718	0.529428		0.581589	0.756931	0.49265	0.715358	0.839333		0.707872	0.662411	0.710394	0.539142	0.406122
0.58708	0.688509	0.593148	0.4436	0.659117		0.668701	0.859129	0.700153	0.782854	0.564227		0.648576	0.567644	0.815536	0.698246	0.88107		0.710717	0.736564	0.708767	0.793162	0.678666
0.659012	0.299958	0.441439	0.273404	0.431134		0.558892	0.603701	0.656831	0.682746	0.577146		0.69504	0.618956	0.833224	0.64234	0.253425		0.921693	0.53374	0.27958	0.650116	0.742853
0.779601	0.543382	0.329394	0.59153	0.591831		0.793397	0.614774	0.389996	0.864154	0.78029		0.475471	0.452797	0.293224	0.443208	0.68512		0.741664	0.664781	0.279533	0.563935	0.739067
0.788773	0.360244	0.193924	0.605105	0.477661		0.914701	0.524434	0.675025	0.731394	0.337829		0.612552	0.775652	0.927979	0.741437	0.917687		0.606456	0.276237	0.20602	0.553962	0.719367
0.745613	0.530125	0.162755	0.358134	0.145979		0.890478	0.696769	0.59511	0.385461	0.630765		0.314039	0.583485	0.686688	0.7055	0.746218		0.546474	0.817226	0.647281	0.584929	0.622634
0.608825	0.580915	0.120404	0.625794	0.497437		0.913316	0.822146	0.877635	0.672486	0.890656		0.918711	0.463172	0.756961	0.316669	0.535921		0.665896	0.533093	0.611755	0.85329	0.443984
0.609276	0.306016		0.436419	0.139735		0.642839	0.869839	0.912983	0.8036	0.384604		0.901045	0.342941	0.75189	0.678811	0.630047		0.892358	0.686549	0.478169	0.798004	0.690007
0.512114	0.676419	0.367763	0.36441	0.179192		0.712892	0.783239	0.571139	0.636092	0.655955		0.883641	0.558814	0.646776	0.558363	0.881106		0.929612	0.690825	0.446541	0.850168	0.678995
0.524273	0.257554	0.633438	0.342937	0.318237		0.739556	0.92341	0.654423	0.500893	0.599287		0.796614	0.321272	0.790479	0.540886	0.792617		0.713632	0.742078	0.536578	0.59401	0.80012
0.557361	0.543115	0.315569	0.801187	0.513405		0.549997	0.526046	0.647238	0.690695	0.418749		0.785082	0.433569	0.584849	0.752308	0.396987		0.812526	0.413937	0.483112	0.516434	0.517369
0.34227	0.3629	0.463196	0.248547	0.200348		0.782751	0.887721	0.832107	0.333894	0.552342		0.935582	0.802305	0.896295	0.70804	0.737265		0.877128	0.43103	0.630097	0.894113	0.791931
0.697773	0.613916	0.748838	0.391484			0.690526	0.318029	0.877409	0.550176	0.752619		0.896669	0.92752	0.55465	0.753013	0.613893		0.9164	0.450397	0.546557	0.823023	0.718446
0.613622	0.609175	0.696598	0.443781	0.501899		0.746937	0.722809	0.566259	0.647824	0.480987		0.947338	0.572981	0.703446	0.648325	0.481197		0.882083	0.668955	0.728858	0.367091	0.497535
0.526624	0.345184	0.447084	0.597959	0.485621		0.52491	0.770819	0.658125	0.653943	0.663112		0.866724	0.632076	0.940294	0.438141	0.808488		0.651829	0.452895	0.758707	0.881797	0.909083
0.847902	0.595922	0.749972	0.565658	0.698068		0.641767	0.486037	0.744741	0.774014	0.674908		0.534617	0.236064	0.804774	0.533785	0.561049		0.611128	0.63302	0.760014	0.863903	0.625882
0.462645	0.469508	0.531227	0.610325	0.728405		0.886711	0.693807	0.47315	0.581707	0.426534		0.750178	0.819478	0.833161	0.83005	0.641545		0.617642	0.642494	0.512927	0.636035	0.751946
0.545545	0.503361	0.585906	0.756254	0.259703		0.515709	0.604971	0.596039	0.376731	0.625133		0.868508	0.648721	0.572745	0.772682	0.583456		0.794333	0.44237	0.678472	0.842361	0.762999
0.725042	0.631785	0.502215	0.610834	0.53052		0.856048	0.693786	0.941068	0.634319	0.647856		0.480812	0.394548	0.487356	0.487616	0.698101		0.475481	0.692729	0.602325	0.57021	0.465576
0.79504	0.512085	0.366203	0.547799	0.645856		0.596651	0.700029	0.746702	0.466073	0.673473		0.96687	0.514871	0.51825	0.741106	0.365592		0.653338	0.441754	0.695887	0.808897	0.833967
0.859471	0.407857	0.388436	0.347986	0.670026		0.71012	0.789884	0.458338	0.810024	0.672876		0.892883	0.623953	0.256294	0.707355	0.728945		0.890374	0.638532	0.890817	0.836262	0.742094
0.828044	0.378659	0.583457	0.555646	0.643164		0.857706	0.275106	0.775321	0.334698	0.792118		0.877253	0.528085	0.784742	0.585502	0.75346		0.757325	0.84278	0.656567	0.836169	0.77718
0.668801	0.576701	0.361065	0.63846	0.452317		0.953408	0.655715	0.429529	0.496148	0.401895		0.86617	0.569969	0.630993	0.752523	0.905873		0.823225	0.38256	0.497745	0.877653	0.611093
0.476227	0.313996	0.332197	0.421448	0.57119		0.802354	0.286759	0.741611	0.644967	0.691651		0.669646	0.786245	0.547491	0.824324	0.633503		0.398814	0.679322	0.460394	0.751471	0.847204
0.61466	0.505771	0.429929	0.394694	0.59833		0.407438	0.785104	0.843986	0.685634	0.775884		0.784613	0.509703	0.79787	0.404767	0.830242		0.77749	0.799618	0.38547	0.663858	0.864495
0.398023	0.439227	0.469945	0.654813	0.547855		0.857353	0.378633	0.748016	0.587953	0.754902		0.851221	0.554887	0.3788	0.849559	0.499343		0.890184	0.87397	0.782538	0.689736	0.750882
0.778793	0.545569	0.544515	0.307417	0.502409		0.785883	0.692835	0.780888	0.499779	0.509995		0.676067	0.625828	0.764468	0.72185	0.592656		0.381352	0.531846	0.602334	0.711113	0.634484
0.780217	0.2949	0.520111	0.478993	0.318169		0.432136	0.885169	0.656923	0.520895	0.657384		0.755134	0.625612	0.634685	0.90693	0.695578		0.874625	0.738562	0.519688	0.82961	0.427968
0.777249	0.547131	0.723414	0.608927	0.541806		0.693347	0.752808	0.470216	0.621352	0.677967		0.592656	0.621146	0.545589	0.767579	0.732268		0.779644	0.578432	0.667485	0.7583	0.850783
0.55737	0.513657	0.365662	0.460122	0.550546		0.617741	0.650362	0.80443	0.439251	0.32468		0.483089	0.629706	0.706906	0.538575	0.660972		0.721495	0.661961	0.326724	0.766207	0.563451
0.541409	0.556515	0.496007	0.642431	0.682221		0.874769	0.145927	0.838974	0.493326	0.709487		0.795476	0.858815	0.82743	0.605184	0.707955		0.703786	0.78947	0.29132	0.926301	0.645806
0.73888	0.406005	0.574483	0.629106	0.487644		0.601305	0.638948	0.860018	0.706669	0.765911		0.826271	0.732979	0.856852	0.462175	0.834522		0.362477	0.563319	0.560137	0.758359	0.722642
0.76646	0.370232	0.242707	0.679308	0.47708		0.607732	0.751643	0.803392	0.752286	0.368739		0.821356	0.789859	0.888116	0.296549	0.734712		0.827949	0.8457	0.34181	0.752906	0.596305
0.667701	0.254895	0.420383	0.616759	0.675179		0.662008	0.541012	0.781753	0.599911	0.580149		0.902123	0.296771	0.863536	0.863245	0.599401		0.871152	0.815232	0.286783	0.478367	0.477624
0.514004	0.403112	0.559271	0.549668	0.431199		0.804547	0.655611	0.841219	0.551456	0.725316		0.860539	0.887066	0.70504	0.613771	0.63013		0.527645	0.549036	0.514184	0.53906	0.428737
0.75392	0.592708	0.69687	0.566987	0.283428		0.621591	0.876483	0.719457	0.412173	0.769394		0.556584	0.72635	0.339551	0.815253	0.907745		0.477791	0.708116	0.711005	0.613257	0.743861
0.338179	0.676076	0.340321	0.413548	0.531363		0.442793	0.337287	0.509771	0.521198	0.44691		0.929224	0.72232	0.84256	0.817537	0.593437		0.77465	0.246624	0.402406	0.482457	0.728912
0.560645	0.728374	0.674268	0.391489	0.624966		0.613903	0.690072	0.625196	0.478952	0.534703		0.908671	0.829666	0.503323	0.678659	0.62334		0.364073	0.829699	0.644542	0.333119	0.822163
0.711841	0.565394	0.497373	0.650684	0.675975		0.844536	0.389409	0.632817	0.68514	0.542554		0.758528	0.53064	0.596788	0.501285	0.914635		0.788484	0.688001	0.496047	0.793026	0.466232
0.627822	0.240187	0.271935	0.597326	0.603425		0.724882	0.588048	0.664775	0.86846	0.70942		0.811657	0.900707	0.68798	0.82173	0.71946		0.958129	0.400823	0.713737	0.912941	0.76311
0.53936	0.74324	0.645912	0.479583	0.478403		0.604035	0.9339	0.756942	0.448451	0.36507		0.885111	0.784015	0.710084	0.698392	0.800593		0.81797	0.640831	0.777978	0.405299	0.476671
0.777675	0.289057	0.523596	0.719884	0.553929		0.925349	0.63518	0.79917	0.515866	0.726576		0.765829	0.675949	0.289538	0.810991	0.924459		0.803008	0.851834	0.631692	0.921123	0.701852
0.650473	0.639127	0.583093	0.446568	0.334176		0.877684	0.860174	0.813238	0.574433	0.883587		0.374665	0.726373	0.609967	0.613836	0.905149		0.893567	0.757918	0.737126	0.548673	0.730386
0.529384	0.865644	0.676943	0.412825	0.505725		0.679064	0.665486	0.830872	0.593915	0.587642		0.358158	0.620337	0.283592	0.917197	0.661782		0.695268	0.747048	0.302076	0.593143	0.495623
0.710672	0.534726	0.309875	0.607213	0.561563		0.790866	0.831966	0.51461	0.415917	0.544749		0.560048	0.773313	0.79927	0.47859	0.800476		0.862153	0.640206	0.663247	0.471983	0.85658
0.474483	0.461659	0.609023	0.358447	0.54342		0.733096	0.52997	0.58431	0.718015	0.446339		0.781066	0.346868	0.36979	0.886238	0.48134		0.671468	0.395414	0.677994	0.884511	0.236912
0.566982	0.222957	0.581138	0.572341	0.762296		0.72725	0.814502	0.515033	0.851663	0.75675		0.71927	0.241551	0.569609	0.763119	0.471586		0.918187	0.359041	0.284386	0.861211	0.426818
0.773362	0.55816	0.422664	0.450958	0.646582		0.84353	0.562368	0.744909	0.458212	0.636847		0.396152	0.798552	0.758862	0.758762	0.724249		0.820225	0.81985	0.8108	0.694352	0.778438
0.880696	0.458273	0.768788	0.512067	0.315045		0.775515	0.875821	0.750136	0.633637	0.569972		0.641712	0.385743	0.821404	0.501616	0.880358		0.487138	0.347104	0.603698	0.831005	0.893482
0.660944	0.44766	0.359271	0.341132	0.520274		0.65913	0.555066	0.58167	0.617042	0.495952		0.540272	0.716065	0.693278	0.743084	0.855058		0.695051	0.648883	0.428007	0.613545	0.861665
0.440722	0.788225	0.630607	0.47282	0.745844		0.730097	0.691253	0.905702	0.923878	0.585128		0.486958	0.483425	0.705264	0.754931	0.488883		0.598851	0.441676	0.809678	0.848654	0.276265
0.674938	0.484174	0.53691	0.571295	0.414786		0.516584	0.706074	0.948504	0.52669	0.747633		0.908844	0.296	0.439141	0.76908	0.934624		0.836835	0.729435	0.796964	0.650878	0.849018
0.426117	0.682956	0.49488	0.58863	0.52815		0.415256	0.582665	0.693587	0.78501	0.725938		0.898466	0.876584	0.396468	0.824709	0.658576		0.407384	0.313549	0.743539	0.862489	0.550379
0.734512	0.572416	0.59776	0.608219	0.230883		0.718366	0.637653	0.736803	0.504919	0.585577		0.556719	0.658401	0.555144	0.926524	0.809538		0.860156	0.569785	0.492309	0.751237	0.780925
0.522644	0.533291	0.64596	0.463465	0.155464		0.872483	0.790969	0.768519	0.582986	0.759568		0.675664	0.701266	0.706599	0.48904	0.913262		0.469985	0.617659	0.354937	0.905935	0.483188
0.443876	0.722957	0.713693	0.578076	0.561775		0.593116	0.669611	0.193301	0.642129	0.638004		0.456557	0.219107	0.402303	0.765713	0.838839		0.664594	0.429148	0.748828	0.602897	0.805228
0.599301	0.410944	0.736829	0.347694	0.656553		0.838363	0.645064	0.768404	0.589364	0.751541		0.926321	0.866807	0.425531	0.507929	0.932556		0.943099	0.889692	0.480221	0.696087	0.789642
0.599815	0.430005	0.530158	0.333918	0.295194		0.910876	0.341346	0.682929	0.724967	0.798004		0.905804	0.419704	0.585881	0.67891	0.864035		0.93892	0.903875	0.482929	0.795229	0.547008
0.675594	0.520157	0.54764	0.538964	0.518825		0.485612	0.188792	0.794875	0.931035	0.395145		0.472289	0.726044	0.385919	0.588281	0.737159		0.612997	0.448609	0.533118	0.696596	0.806307
0.866206	0.542975	0.625936	0.64982	0.484541		0.54589	0.582559	0.75806	0.669532	0.676136		0.319126	0.694566	0.642378	0.837557	0.684088		0.678586	0.784058	0.773285	0.26691	0.922475
0.316011	0.533176	0.581339	0.626798	0.293767		0.437292	0.500785	0.916893	0.674956	0.721435		0.704638	0.646619	0.327545	0.516946	0.932327		0.939235	0.881579	0.163943	0.822121	0.705038
0.433463	0.273821	0.911853	0.438607	0.428407		0.317567	0.66266	0.782516	0.580825	0.760906		0.617858	0.686902	0.730104	0.623615	0.647283		0.908637	0.736626	0.813676	0.852086	0.732837
0.694933	0.606822	0.577375	0.585587	0.519536		0.831217	0.308581	0.822013	0.718438	0.935147		0.906994	0.67106	0.672908	0.864312	0.696721		0.920592	0.306249	0.245435	0.773833	0.690014
0.902043	0.469357	0.549687	0.457072	0.781407		0.663797	0.606898	0.651521	0.389103	0.701043		0.543821	0.681545	0.774806	0.82448	0.794071		0.52195	0.540934	0.494171	0.903323	0.670379
0.877353	0.679869	0.524969	0.835936	0.592943		0.601323	0.767682	0.704666	0.647694	0.809314		0.933037	0.546384	0.581149	0.538787	0.764412		0.861954	0.221314	0.839596	0.298884	0.442966
0.668188	0.4143	0.499223	0.667582	0.526752		0.539009	0.643052	0.615066	0.777205	0.888222		0.489649	0.665664	0.595818	0.625775	0.657898		0.665243	0.438214	0.631782	0.615271	0.818637
0.471782	0.381731	0.507989	0.341889	0.369837		0.821766	0.234445	0.434475	0.834603	0.671449		0.813117	0.612737	0.764932	0.835717	0.737761		0.923073	0.452331	0.318799	0.838039	0.645461
0.424435	0.437937	0.581912	0.557736	0.490641		0.877519	0.616846	0.693896	0.550376	0.287051		0.926295	0.663786	0.164688	0.63643	0.859605		0.562239	0.703576	0.490683	0.817902	0.679778
0.519351	0.41871	0.471183	0.198611	0.474485		0.772355	0.816194	0.785286	0.588506	0.43333		0.403832	0.769833	0.576256	0.557592	0.315011		0.852011	0.669534	0.899766	0.734228	0.782782
0.638818	0.580875	0.608929	0.543949	0.492337		0.648652	0.409868	0.66737	0.769599	0.541821		0.927599	0.826531	0.344706	0.801806	0.599508		0.687337	0.617424	0.578137	0.909642	0.58662
0.853611	0.460593	0.497873	0.432248	0.526834		0.927284	0.723631	0.311531	0.616723	0.660756		0.81288	0.602909	0.450577	0.524533	0.846908		0.781751	0.414986	0.349472	0.754341	0.769687
0.394552	0.133114	0.241664	0.263401	0.485982		0.492326	0.824838	0.491713	0.613982	0.643402		0.934546	0.609525	0.561611	0.665401	0.504797		0.788677	0.460281	0.718679	0.352819	0.854826
0.69561	0.362586	0.24372	0.570235	0.507532		0.708221	0.913115	0.712033	0.676924	0.761849		0.903769	0.317347	0.816838	0.543792	0.802		0.905256	0.484218	0.664803	0.812969	0.531676
0.447102	0.235876	0.113771	0.401259	0.451634		0.622144	0.651661	0.441726	0.602289	0.787359		0.641088	0.81697	0.816368	0.602367	0.858114		0.597032	0.704853	0.647895	0.720342	0.608217
0.41673	0.580786	0.364282	0.550439	0.655917		0.589266	0.551824	0.42995	0.581138	0.482711		0.589254	0.741068	0.503197	0.496498	0.789938		0.424998	0.691632	0.481496	0.735134	0.519726
0.653243	0.379224	0.154273	0.338656	0.27437		0.684015	0.461896	0.767725	0.57199	0.614602		0.68391	0.476315	0.425488	0.623591	0.867668		0.5967	0.539971	0.385062	0.40254	0.941055
0.246456	0.494428	0.138656	0.254654	0.662157		0.561967	0.442897	0.627378	0.601984	0.894107		0.600446	0.276511	0.85505	0.804057	0.51585		0.675609	0.704423		0.822602	0.737471
0.559388	0.267219		0.611012	0.637792		0.906876	0.351961	0.834868	0.804054	0.612405		0.414578	0.524383	0.873987	0.588475	0.680673		0.842271	0.458838	0.634241	0.647338	0.638964
0.613917	0.320409		0.749575	0.179731		0.821439	0.61382	0.848629	0.701481	0.654681		0.791278	0.27911	0.731189	0.417019	0.599045		0.891401	0.653573	0.359808	0.793085	0.554308
0.820891	0.619804		0.730101	0.607674		0.533864	0.370422	0.829935	0.396297	0.829703		0.677303	0.569047	0.428342	0.870336	0.751992		0.880484	0.519069	0.672148	0.861969	0.710483
0.717088	0.603079		0.748374	0.520529		0.663463	0.653471	0.297184	0.686062	0.82981		0.702679	0.262392	0.74837	0.493094	0.766395		0.950942		0.783909	0.816512	0.882441
0.41428	0.181769		0.600043	0.35465		0.498685	0.676399	0.523323	0.430168	0.713363		0.890622	0.303731	0.866043	0.803508	0.319488		0.608955	0.394165	0.635595	0.697275	0.547693
0.780456	0.556742		0.38927	0.42664		0.784944	0.260458	0.742504	0.512253	0.85225		0.787658	0.750761	0.496066	0.445226	0.634512		0.558425	0.716323	0.52143	0.653651	0.727947
0.445222	0.810773		0.565157	0.646413		0.384598	0.715908	0.738728	0.666954	0.471203		0.815986	0.782959	0.428282	0.716194	0.593828		0.881151	0.732357	0.489673	0.652492	0.841227
0.555528	0.422898		0.456897	0.376816		0.425205	0.663393	0.640385	0.489621	0.70315		0.44184	0.376351	0.308791	0.504988	0.437662		0.935753	0.626704	0.585568	0.721394	0.318672
0.564349	0.645148		0.320285	0.791763		0.56398	0.922477	0.691024	0.593425	0.564944		0.706901	0.399075	0.430333	0.615403	0.782762		0.638741	0.766503	0.504693	0.675717	0.82884
0.453161	0.193957		0.490838	0.213275		0.709683	0.805281	0.548422	0.760025	0.553492		0.380812	0.608118	0.457042	0.733331	0.563931		0.820337	0.483893	0.544526	0.785694	0.602256
0.282735	0.691034		0.465195	0.564726		0.452747	0.600695	0.571948	0.651286	0.669914		0.702955	0.531187	0.350812	0.823665	0.774549		0.936835	0.659789	0.48201	0.425169	0.682635
0.885183	0.578342		0.558599	0.691025		0.695985	0.541669	0.851715	0.327473	0.67068		0.928998	0.401881	0.601248	0.800677	0.708117		0.889429	0.771913	0.923842	0.239384	0.787274
0.359504	0.519168		0.630262	0.354407		0.321198	0.510573	0.77443	0.531556	0.328602		0.7044	0.765488	0.87313	0.396269	0.755485		0.904387	0.411409	0.850214	0.530367	0.859849
0.85695	0.247713		0.52163	0.206947		0.688967	0.451905	0.790091	0.536534	0.689902		0.340066	0.849701	0.313057	0.619577	0.763616		0.407205	0.79028	0.725795	0.801152	0.736865
0.872782	0.586317		0.767923	0.512765		0.83076	0.838766	0.754936	0.576527	0.537833		0.906606	0.634176	0.847524	0.689513	0.441197		0.751403	0.73755	0.371119	0.632425	0.716687
0.579539	0.577873		0.388282	0.323912		0.940647	0.551081	0.653508	0.783463	0.804445		0.903484	0.821761	0.311903	0.924564	0.361529		0.923273	0.550399	0.729112	0.440336	0.304089
0.54976	0.75867		0.697542	0.499678		0.786454	0.693341	0.487982	0.885499	0.515988		0.388081	0.627793	0.588869	0.811759	0.911427		0.855822	0.632836	0.725131	0.85491	0.728551
0.628523	0.291062		0.517711	0.28149		0.899826	0.229565	0.436827	0.607595	0.634805		0.605322	0.532345	0.515833	0.668981	0.616946		0.938306	0.331149	0.495332	0.485887	0.933514
0.404017	0.411986		0.479101	0.577559		0.604543	0.643773	0.588204	0.428798	0.661165		0.729045	0.54449	0.37187	0.404605	0.670266		0.89743	0.903141	0.668089	0.4096	0.726183
0.411205	0.543513		0.645338	0.712821		0.767379	0.474508	0.465987	0.740661	0.744785		0.671593	0.777989	0.815861	0.751351	0.72096		0.563057	0.659616	0.685073	0.699858	0.491778
0.469541	0.554501		0.418404	0.6511		0.541391	0.812255	0.915081	0.785612	0.733466		0.598261	0.677445	0.498204	0.799878	0.889168		0.91367	0.68683	0.700271	0.695516	0.486258
0.628601	0.602963		0.450595	0.48456		0.783922	0.520714	0.845821	0.810383	0.720301		0.492079	0.654153	0.807165	0.741089	0.721704		0.927052	0.892422	0.830949	0.783915	0.904858
0.453649	0.349311		0.5943	0.44417		0.55634	0.746911	0.748168	0.754198	0.809797		0.80205	0.879521	0.614631	0.62413	0.48937		0.759358	0.50622	0.563931	0.7021	0.445901
0.659748	0.591179		0.432739	0.252973		0.801051	0.288886	0.500684	0.662364	0.637437		0.66709	0.540693	0.598461	0.810494	0.392628		0.788658	0.354604	0.336826	0.455397	0.586124
0.776935	0.293957		0.656711	0.592421		0.878677	0.656803	0.851169	0.478201	0.672583		0.810872	0.647169	0.277086	0.603186	0.450051		0.813434	0.406432	0.565475	0.504912	0.912216
0.659615	0.589407		0.333284	0.732261		0.798806	0.765887	0.617893	0.570929	0.529272		0.54944	0.371159	0.153915	0.832709	0.822623		0.944763	0.382738	0.709182	0.446147	0.830371
0.37347	0.404386		0.368448	0.266243		0.784976	0.709063	0.869692	0.800351	0.727768		0.863015	0.597848	0.647501	0.294527	0.640906		0.8082	0.612853	0.616297	0.426245	0.65621
0.668222	0.525067		0.334846	0.634065		0.552608	0.445744	0.417292	0.625735	0.492603		0.94181	0.868917	0.673788	0.631865	0.93917		0.910239	0.314148	0.662717	0.617499	0.812712
0.754678	0.47329		0.468392	0.561452		0.802796	0.431761	0.784013	0.453988	0.442865		0.827597	0.697239	0.413444	0.854688	0.297769		0.726095	0.596043	0.51118	0.722713	0.901184
0.340767	0.249906		0.510642	0.2122		0.732071	0.480293	0.879991	0.62088	0.196994		0.876636	0.595152	0.604194	0.901951	0.621155		0.358717	0.573186	0.697966	0.839054	0.292608
0.59977	0.518775		0.60319	0.271703		0.387402	0.634171	0.873312	0.60718	0.735923		0.630543	0.477473	0.591608	0.686577	0.616813		0.431541	0.590976	0.564713	0.888641	0.904117
0.497318	0.530631		0.675476	0.525391		0.799288	0.385335	0.709608	0.84385	0.606043		0.584033	0.650879	0.904537	0.770278	0.911409		0.860767	0.298366	0.752367	0.679181	0.52321
0.500217	0.539648		0.448467	0.598913		0.708305	0.635407	0.841778	0.813847	0.383099		0.65542	0.563112	0.522288	0.819163	0.943638		0.788591	0.81534	0.602807	0.876006	0.504557
0.404008	0.593456		0.235032	0.701633		0.890915	0.910731	0.944129	0.681488	0.570742		0.431141	0.570858	0.685746	0.774876	0.841478			0.520104	0.72261	0.862373	0.558915
0.583076	0.582573		0.411193	0.592668		0.779646	0.663493	0.646739	0.551125	0.767623		0.54041	0.422807	0.852069	0.5057	0.635519		0.779226	0.55381	0.895346	0.775096	0.679544
0.388135	0.482245		0.358327	0.580861		0.806499	0.516874	0.588894	0.468479	0.754041			0.771819	0.265261	0.511381	0.732199		0.9527	0.864849	0.696917	0.634675	0.71157
0.486242	0.391258		0.6432	0.564154		0.889589	0.537777	0.661073	0.560882	0.746799		0.823154	0.898784	0.714901	0.746755	0.571943		0.546442	0.798527	0.527686	0.776435	0.729315
0.87771	0.627406		0.478695	0.680409		0.782756	0.622862	0.605855	0.683226	0.525004		0.837792	0.720399	0.572181	0.483414	0.55145		0.925648	0.879886	0.804676	0.598749	0.498475
0.717132	0.39374		0.472932	0.290628		0.550486	0.308825	0.863993	0.757843	0.24381		0.761746	0.877511	0.848355	0.813538	0.591981		0.666142	0.751358	0.740439	0.675205	0.609676
0.620451	0.177036		0.478415	0.442629		0.78093	0.923081	0.609447	0.440265	0.559343		0.604827	0.792555	0.509019	0.716614	0.55581		0.681244	0.533399	0.824153	0.577081	0.614193
0.574208	0.635746		0.594235	0.466755		0.439498	0.636177	0.912305	0.581389	0.780957		0.749254	0.861933	0.779458	0.465288	0.636623		0.573389	0.764692	0.506739	0.739599	0.535572
0.688241	0.452217		0.303175	0.425387		0.609509	0.500429	0.468905	0.681606	0.549972		0.843448	0.666856		0.781698	0.647741		0.538518	0.552187	0.862971	0.805639	0.652687
0.828396	0.247453		0.626154	0.278405		0.755085	0.788412	0.794651	0.600209	0.612563		0.868988	0.693496	0.628014	0.64783	0.504285		0.691587	0.37804	0.835977	0.823779	0.797007
0.927454	0.428057		0.510906	0.258697		0.505621	0.456619	0.901249	0.853517	0.750891		0.86475	0.572851	0.850698	0.790892	0.754854		0.650847	0.792717	0.824585	0.599483	0.704894
0.72236	0.50467		0.590529	0.262991		0.378631	0.807316	0.767757	0.812566	0.786604		0.773641	0.663737	0.388267	0.676785	0.659922		0.771356	0.629243	0.506701	0.458837	0.272001
0.737326	0.555279		0.617381	0.356934		0.424888	0.668708	0.47175	0.869893	0.759651		0.794334	0.582788	0.553428	0.92252	0.757821		0.702129	0.711407	0.79242	0.186462	0.496403
0.620934	0.569883		0.563952	0.693112		0.680038	0.622939	0.630801	0.611526	0.703501		0.730582	0.83441	0.485029	0.766338	0.378317		0.745579	0.329474	0.691272	0.477951	0.426947
0.524439	0.518736		0.51875	0.510817		0.386351	0.535133	0.395106	0.418486	0.826488		0.916031	0.711992	0.643569	0.719137	0.80913		0.530171	0.772806	0.658912	0.354721	0.237935
0.846282	0.406625		0.344605	0.567315		0.698587	0.639747	0.904059	0.613306	0.677566		0.942024	0.423085	0.668337	0.719765	0.82589		0.676772	0.496263	0.668662	0.350629	0.74006
0.668835	0.356206		0.436556	0.435091		0.861271	0.798207	0.761857	0.790692	0.372669		0.531758	0.631816	0.795641	0.532305	0.730358		0.932191	0.756156	0.329345	0.902671	0.876918
0.571367	0.448614		0.667175	0.552876		0.798338	0.690293	0.895379	0.696764	0.271762		0.938655	0.482224	0.348997	0.639808	0.778696		0.64882	0.552188	0.783717	0.624451	0.797801
0.64744	0.532643		0.701681	0.544908		0.49872	0.314571	0.276455	0.884191	0.642646		0.917847	0.668561	0.812696	0.549005	0.836214		0.843343	0.520287	0.810349	0.292937	0.603048
0.917594	0.570335		0.61608	0.647622		0.635428	0.601893	0.770755	0.780728	0.772284		0.79206	0.404443	0.480428	0.796371	0.839098		0.772125	0.674271	0.723837	0.582847	0.867981
0.484542			0.501563	0.646941		0.916552	0.819172	0.374406	0.595255	0.721397		0.546902	0.632492	0.303524	0.799035	0.87142		0.669091	0.848185	0.844499	0.599839	0.729973
0.623915	0.553846		0.397887	0.529821		0.675553	0.569562	0.79654	0.690545	0.304289		0.381836	0.731391	0.725451	0.591829	0.869526		0.826325	0.744804	0.727415	0.732179	0.555425
0.937481	0.496754		0.880396	0.527393		0.892782	0.407435	0.774507	0.869429	0.70532		0.679533	0.391364	0.537291	0.865674	0.635145		0.797093	0.745716	0.728059	0.766271	0.600626
0.717053	0.53039		0.495622	0.476478		0.758635	0.53883	0.839792	0.527796	0.774385		0.412237	0.884089	0.727169	0.741599	0.774721		0.74197	0.687056	0.283761	0.730149	0.631522
0.327849	0.321797		0.575086	0.292445		0.8894	0.29453	0.723515	0.609576	0.412456		0.889853	0.738336	0.720423	0.593114	0.751727		0.637136	0.462418	0.71138	0.786041	0.813928
0.778208	0.421548		0.830034	0.192151		0.778645	0.84617	0.74511	0.43897	0.696093		0.686899	0.508115	0.254612	0.688756	0.470388		0.599437	0.894431	0.548797	0.443848	0.633382
0.68902	0.48178		0.51233	0.475973		0.91984	0.248417	0.816928	0.451672	0.846055		0.921926	0.599555	0.637514	0.280316	0.630387		0.560001	0.297031	0.538234	0.778203	0.611304
0.528667	0.770559		0.714505	0.605404		0.544805	0.483871	0.869343	0.563773	0.825253		0.633095	0.430501	0.90244	0.639573	0.899381		0.890038	0.859027	0.501035	0.930376	0.36059
0.662278	0.587502		0.661601	0.637796		0.815604	0.442246	0.852455	0.676764	0.818274		0.725342	0.46891	0.553652	0.776788	0.797163		0.891097	0.200804	0.527598	0.613796	0.761812
0.462064	0.355084		0.473706	0.202518		0.929208	0.556179	0.819524	0.687387	0.530278		0.624529	0.689664	0.430078	0.557231	0.580262		0.635345	0.549952	0.628308	0.702032	0.820887
0.324823	0.308441		0.461582	0.541852		0.449221	0.659692	0.889915	0.396888	0.658026		0.556437	0.612088	0.668375	0.411666	0.64984		0.677894	0.59092	0.793141	0.640318	0.544164
0.6187	0.63593		0.327696	0.710897		0.579878	0.735088	0.898759	0.453029	0.63007		0.937462	0.49689	0.671583	0.432195	0.86695		0.658802	0.831436	0.586049	0.674967	0.697794
0.804157	0.391487		0.603138	0.559414		0.880793	0.560943	0.581475	0.830844	0.258223		0.35734	0.673382	0.562888	0.708052	0.788037		0.874117	0.675328	0.405515	0.420789	0.762432
0.711682	0.602494		0.403766	0.553827		0.786141	0.458131	0.731599	0.743425	0.746967		0.962349	0.440257	0.656629	0.613984	0.567035		0.759473	0.647583	0.754784		0.812148
0.512056	0.370993		0.325219	0.545871		0.742484	0.683624	0.836524	0.62626	0.530356		0.948901	0.770457	0.676206	0.635063	0.241354		0.386287	0.610451	0.806944	0.552072	0.8744
0.627089	0.628219		0.567149	0.460386		0.51018	0.52454	0.662684	0.494586	0.667147		0.8601	0.630032	0.712802	0.775908	0.929712		0.823868	0.318797	0.589578	0.811951	0.82277
0.524596	0.75694		0.496131	0.133336		0.46959	0.483796	0.549973	0.462671	0.3585		0.859539	0.239141	0.817648	0.682329	0.505216		0.905977	0.293102	0.439696	0.795342	0.509387
0.791871	0.65654		0.675554	0.315642		0.672388	0.280523	0.319793	0.880415	0.597694		0.803421	0.64546	0.425321	0.582229	0.785006		0.717242	0.918117	0.551532	0.59702	0.831235
0.695727	0.580169		0.576994	0.515946		0.729438		0.783523	0.807053	0.833102		0.613539	0.847858	0.624663	0.452538	0.631217		0.88325	0.619672	0.855027	0.455967	0.630108
0.550768	0.42567		0.265272	0.492837		0.828184	0.408489	0.848382	0.691443	0.476549		0.789807	0.788827	0.597762	0.751741	0.796204		0.453972	0.591293	0.882746	0.61317	0.737128
0.733821	0.28513		0.650899	0.614603		0.671176	0.369861	0.70205	0.492072	0.491801		0.653094	0.556263	0.597894	0.338393	0.643436		0.642264	0.670419	0.768784	0.810448	0.723954
0.487013	0.586538		0.573238	0.215266		0.67936	0.827385	0.822747	0.590087	0.755925		0.617804	0.510726	0.727362	0.52963	0.925904		0.773009	0.346438	0.514037	0.820198	0.797018
0.426572	0.371203		0.525776	0.541535		0.676543	0.671328	0.550911	0.728607	0.870749		0.880645	0.444851	0.493466	0.586589	0.732787		0.861058	0.507395	0.719234	0.639146	0.661607
0.336479	0.814174		0.310128	0.510494		0.581951	0.735427	0.694678	0.819793	0.703113		0.305262	0.525773	0.57295	0.860164	0.82597		0.538979	0.847303	0.293015	0.696044	0.670564
0.635756	0.453003		0.210965	0.344883		0.918359	0.74039	0.297275	0.571272	0.253646		0.895961	0.791026	0.530738	0.741636	0.60347		0.733442	0.703068	0.802876	0.807703	0.623218
0.72194	0.611146		0.541553	0.700172		0.965117	0.635756		0.906615	0.611807		0.810984	0.519909	0.436526	0.746665	0.506722		0.847151	0.532524	0.758502	0.89887	0.633035
0.629539	0.405992		0.252039	0.44698		0.665285	0.752629	0.767316	0.687226	0.745128		0.924319	0.786449	0.765597	0.655571	0.865899		0.795073	0.567337	0.481658	0.754201	0.843849
0.635146	0.622112		0.538503	0.510271		0.821202	0.472281	0.642235	0.833516	0.597628		0.633878	0.607051	0.735415	0.634779	0.683613		0.916525	0.17651	0.841342	0.885637	0.682356
0.636797	0.600812		0.336306	0.41696		0.521826	0.655161	0.73187	0.73768	0.804185		0.858484	0.769914	0.700192	0.521504	0.581627		0.686308	0.587658	0.588777	0.83214	0.775239
0.572429	0.304279		0.367289	0.389556		0.606201	0.608429	0.728279	0.523944	0.687761		0.644633	0.781359	0.778402	0.476809	0.851999		0.93348	0.729413	0.654179	0.435941	0.937055
0.401686	0.384122		0.571686	0.711756		0.841404	0.523758	0.634687	0.839568	0.563139		0.684234	0.457435	0.223531	0.551388	0.60532		0.466179	0.682724	0.77124	0.528945	0.676863
0.728577	0.217135		0.612619	0.342503		0.863279	0.672375	0.835585	0.75034	0.646125		0.604697	0.668482	0.782656	0.770107	0.398081		0.789186	0.846632	0.629822	0.874739	0.593802
0.652651	0.376874		0.611179	0.361832		0.722476	0.623697	0.66882	0.411795	0.534188		0.929205	0.642551	0.558814	0.693505	0.505586		0.897484	0.737064	0.630792	0.794883	0.699725
0.644839	0.175814		0.636347	0.488352		0.574021	0.470627	0.824077	0.67639	0.481527		0.850442	0.725864	0.552082	0.868382	0.386586		0.684211	0.731072	0.609994	0.739717	0.86833
0.57539	0.463644		0.568525	0.545888		0.674373	0.615118	0.555066	0.665785	0.743002		0.585181	0.628133	0.59694	0.633074	0.651429		0.683539	0.588574	0.388939	0.824223	0.470411
0.55504	0.352502		0.832181	0.27066		0.866026	0.531352	0.790395	0.880005	0.670459		0.934422	0.58898	0.66651	0.589995	0.737852		0.735582	0.831087	0.775181	0.922048	0.732968
0.474266	0.330518		0.413658	0.418331		0.83278	0.6315	0.785667	0.829356	0.311479		0.959929	0.382787	0.754761	0.749667	0.58392		0.853225	0.352527	0.217015	0.38235	0.751516
0.624138	0.409492		0.264491	0.175095		0.848934	0.39215	0.656653	0.386067	0.297536		0.898222	0.676961	0.604593	0.547167	0.403544		0.928959	0.202376	0.895929	0.808726	0.782882
0.556749	0.283705		0.417049			0.881009	0.431486	0.575673	0.605902	0.670583		0.912791	0.871195	0.775564	0.52277	0.429615		0.622068	0.682053	0.835598	0.919526	0.844024
0.739265	0.593215		0.378234	0.590969		0.868902	0.857417	0.923075	0.712311	0.700728		0.603227	0.908888	0.339254	0.829048	0.333364		0.639227	0.551798	0.878644	0.540743	0.692785
0.695939	0.48594		0.458487	0.299217		0.800557	0.772852	0.884229	0.540066	0.482972		0.886211	0.66003	0.654023	0.663166	0.629665		0.924286	0.548151	0.805989	0.722641	0.641666
0.819962	0.536767		0.629215	0.476665		0.920958	0.691797	0.87864	0.230802	0.369434		0.75057	0.869602	0.778066	0.771043	0.675905		0.670652	0.709099	0.546165	0.586148	0.661668
0.622788	0.752857		0.264661	0.508769		0.932877	0.678934	0.621241	0.673163	0.52165		0.926659	0.699059	0.173621	0.777483	0.872014		0.611527	0.229707	0.626317	0.7284	0.812027
0.701792	0.620128		0.580793	0.749854		0.728253	0.465276	0.483613	0.716861	0.181352		0.812931	0.540258	0.736634	0.651358	0.826818		0.94338	0.680671	0.669842	0.774306	0.744164
0.530101	0.473413		0.629565	0.555826		0.770952	0.624562	0.638827	0.607961	0.694067		0.894172	0.724951	0.42085	0.678044	0.781018		0.915436	0.70858	0.723003	0.880592	0.359581
0.523365	0.511017		0.608901	0.519186		0.405156	0.424855	0.599681	0.753073	0.72789		0.941847	0.685552	0.384762	0.700153	0.663589		0.736761	0.825347	0.571336	0.710883	0.758731
0.571207	0.530727		0.27745	0.619639		0.82302	0.689416	0.869633	0.526824	0.357128		0.877646	0.389346	0.640599	0.774532	0.683655		0.941218	0.861554	0.325089	0.588526	0.547186
0.388803	0.701993		0.47474	0.323819		0.794306	0.506418	0.815753	0.251958	0.861437		0.853354	0.59011	0.679494	0.38793	0.734858		0.825225	0.710547	0.597574	0.74226	0.792121
0.663887	0.19507		0.585625	0.72568		0.946961	0.554236	0.506137	0.830076	0.779432		0.661601	0.552973	0.336129	0.760556	0.501071		0.6121	0.57949	0.928523	0.464819	0.373522
0.550511	0.435		0.51439	0.537559		0.639939	0.513724	0.728572	0.874511	0.181936		0.870052	0.609471	0.704122	0.771296	0.845044		0.749116	0.815468	0.379673	0.252578	0.713279
0.773194	0.490997		0.392515	0.503654		0.720584	0.521303	0.343322	0.685832	0.785775		0.883849	0.518527	0.671306	0.572083	0.805034		0.902988	0.602531	0.891036	0.881664	0.737679
0.333465	0.452623		0.475596	0.304573		0.786183	0.696639	0.842076	0.610509	0.766314		0.92895	0.577291	0.427939	0.760176	0.878455		0.69889	0.792592	0.787339	0.644179	0.855237
0.91163	0.7181		0.499796	0.579945		0.9377	0.542149	0.519653	0.645492	0.625544		0.863641	0.275263	0.723493	0.655959	0.742994		0.367864	0.577269	0.451696	0.407102	0.353598
0.505239	0.138295		0.320836	0.460266		0.522533	0.600024	0.605662	0.649933	0.367982		0.396728	0.734853	0.657911	0.674495	0.825832		0.349436	0.708192	0.787694	0.824309	0.284431
0.634255	0.190624		0.51674	0.689408		0.509604	0.598428	0.554763	0.472233	0.934616		0.902124	0.32119	0.778644	0.793588	0.832103		0.694598	0.723885	0.673827	0.682752	0.74041
0.486151	0.554573		0.600489	0.312525		0.757001	0.475122	0.735087	0.858705	0.827811		0.900551	0.670921	0.705793	0.765903	0.696075		0.684372	0.293489	0.570258	0.918968	0.518908
0.678976	0.764926		0.481715	0.568449		0.540303	0.258178	0.881074	0.864843	0.620111		0.912254	0.553829	0.332209	0.889912	0.612966		0.843089	0.708847	0.870241	0.820688	0.75324
0.656776	0.566175		0.676658	0.578312		0.679608	0.674866	0.704048	0.654839	0.291941		0.554681	0.832682	0.662761	0.730541	0.348294		0.649162	0.534287	0.886293	0.785768	0.392407
0.76881	0.352404		0.264072	0.538281		0.633887	0.482757	0.653164	0.733519	0.232236		0.868096	0.578893	0.535303	0.573552	0.833831		0.939974	0.809664	0.689062	0.893524	0.690174
0.724502	0.598076		0.518784	0.696567		0.872395	0.695891	0.539409	0.409254	0.619284		0.916472	0.445415	0.799457	0.661554	0.70268		0.937614	0.407864	0.705479	0.819344	0.605456
0.461909	0.725718		0.481696	0.310578		0.812898	0.357284	0.770347	0.659691	0.283034		0.333888	0.473645	0.333203	0.712769	0.59816		0.908601	0.80793	0.576487	0.842667	0.680644
0.372627	0.609297		0.48416	0.559439		0.79653	0.219505	0.374172	0.693417	0.462874		0.557151	0.518693	0.729474	0.550147	0.815028		0.783865	0.485917	0.744389	0.670904	0.884195
0.450999	0.387508		0.518018	0.380028		0.82512	0.593487	0.798156	0.77459	0.869768		0.837967	0.429284	0.736491	0.311885	0.744263		0.459685	0.568183	0.862293	0.686951	0.726327
0.58167	0.545117			0.564055		0.494441	0.251058	0.819873	0.745778	0.358738		0.851079	0.476263	0.864311	0.668023	0.789982		0.764867	0.621159	0.324907	0.872987	0.806084
0.787931	0.606025		0.507218	0.571143		0.516809	0.431094	0.910179	0.592675	0.644255		0.946374	0.739362	0.649472	0.942346	0.883153		0.65413	0.636851	0.903887	0.828774	0.565712
0.759055	0.593918		0.29747	0.563614		0.572689	0.625188	0.379733	0.673066	0.512768		0.840353	0.636176	0.905536	0.748252	0.83756		0.717805	0.281176	0.744169	0.82726	0.660975
0.461206	0.802595		0.664384	0.591431		0.459713	0.705589	0.658058	0.793756	0.475814		0.906561	0.670587	0.697934	0.830277	0.517528		0.924794	0.45493	0.493235	0.85323	0.41409
0.518214	0.191789		0.50389	0.457764		0.457689	0.785812	0.914107	0.59068	0.395675		0.506931	0.768493	0.877795	0.517822	0.680608		0.77125	0.537945	0.38859	0.749835	0.835732
0.539222	0.49747		0.469176	0.57438		0.439154	0.410222	0.892221	0.405789	0.515089		0.926801	0.234785	0.462411	0.763558	0.712786		0.622934	0.560981	0.345673	0.692304	0.671987
0.68352	0.362645		0.310544	0.52794		0.928537	0.934706	0.583815	0.613735	0.537451		0.794069	0.810778	0.616927	0.750853	0.701124		0.968079	0.845588	0.834037	0.864017	0.247301
0.626506	0.52896		0.368197	0.59964		0.850661	0.829157	0.597816	0.494045	0.692197		0.716984	0.565923	0.573299	0.610147	0.832118		0.91549	0.404641	0.647053	0.339601	0.728691
0.397536	0.144654		0.681619	0.654292		0.818457	0.395996	0.881086	0.596899	0.389952		0.81322	0.67619	0.353278	0.902772	0.625555		0.503148	0.791967	0.19768	0.781911	0.372098
0.591944	0.328015		0.477688	0.542848		0.874254	0.217028	0.685317	0.743342	0.690423		0.879334	0.400133	0.861228	0.408733	0.508885		0.92277	0.362834	0.717133	0.729967	0.706949
0.614959	0.646634		0.169441	0.307462		0.802105	0.523552	0.920757	0.628511	0.755965		0.705656	0.624953	0.800147	0.452425	0.781825		0.467681	0.593082	0.538601	0.910731	0.584147
0.462758	0.578399		0.571732	0.318243		0.834454	0.600435	0.421159	0.691169	0.314515		0.895638	0.715187	0.617211	0.63293	0.453568		0.923119	0.588568	0.746594	0.313363	0.8855
0.371423	0.338695		0.627605	0.373188		0.894026	0.724976	0.885654	0.707298	0.784878		0.719165	0.460034	0.703217	0.526286	0.631973		0.749475	0.462025	0.680165	0.662549	0.42838
0.195585	0.409545		0.503114	0.677454		0.907467	0.523771	0.382401	0.42424	0.599131		0.893887	0.383404	0.307463	0.447712	0.354344		0.640929	0.598168	0.481872	0.835288	0.868064
0.379881	0.648939		0.528389	0.64529		0.859898	0.691791	0.830518	0.495138	0.45632		0.540711	0.520069	0.746387	0.221491	0.773247		0.660855	0.612769	0.792134	0.524065	0.692441
0.337082	0.422811		0.600032	0.649057		0.665069	0.365903	0.345235	0.766139	0.676593		0.920204	0.45439	0.207755	0.901186	0.128709		0.823387		0.478728	0.669691	0.645042
0.274122	0.806752		0.527548	0.701015		0.520035	0.62828	0.925994	0.201715	0.70565		0.770004	0.639328	0.863819	0.79519	0.711771		0.914934		0.816449	0.770507	0.862504
0.433551	0.447672		0.275976	0.139157		0.575372	0.409796	0.557419	0.59402	0.389217		0.874345	0.724465	0.78433	0.605945	0.735543		0.767316			0.594243	0.856069
0.597863	0.654828		0.454216	0.522961		0.818148	0.750098	0.896278	0.511871	0.577072		0.654405	0.576815	0.374227	0.25535	0.691265		0.700122			0.773252	0.459193
0.676505	0.324747		0.59613	0.61351		0.579683	0.69347	0.814144	0.521522	0.52929		0.819023	0.561548	0.38611	0.774648	0.754195		0.792991			0.481358	0.435758
0.361757	0.52728		0.555241	0.331505		0.747877	0.574505	0.415023	0.600848	0.523208		0.761224	0.532583	0.589733	0.731718	0.548706		0.39473			0.785355	0.494604
0.274464	0.488681		0.463055	0.427352			0.79427	0.854968	0.446551	0.661457		0.840503	0.355382	0.798813	0.720313	0.354907		0.934723			0.548089	0.910902
0.477768	0.152378		0.515369	0.444354		0.721919	0.580393	0.513153	0.711356	0.669391		0.704095	0.383406	0.277963	0.818109	0.540118		0.864682			0.834989	0.318343
0.899348	0.502538		0.601054	0.64097		0.772722	0.565763	0.920792	0.540299	0.464945		0.788041	0.617564	0.854766	0.526489	0.494452		0.524086			0.736838	0.608618
0.672144	0.641187		0.450239	0.434878		0.386219	0.857587	0.644259	0.482228	0.645381		0.888636	0.653406	0.832807	0.685069	0.478571		0.945217			0.700847	0.47699
0.525693	0.309737		0.453044	0.55364		0.825596	0.521162	0.903726	0.760091	0.74874		0.413194	0.186911	0.865934	0.700846	0.412853		0.549923			0.604584	0.857472
0.445277	0.304726		0.695111	0.502419		0.617153	0.652985	0.476153	0.677137	0.689272		0.781355	0.653672	0.694477	0.489762	0.83972		0.763411			0.689018	0.440715
0.478135			0.342675	0.581922		0.608054	0.655268	0.828387	0.314632	0.84492		0.8934	0.575434	0.538736	0.700858	0.34363		0.774168			0.884509	0.763395
0.78621	0.69185		0.530479	0.581449		0.80622	0.778021	0.888586	0.686027	0.883743		0.912558	0.763009	0.577007	0.544712	0.766154		0.321733			0.693755	0.716878
0.877142	0.726268		0.602084	0.493341		0.95148	0.521707	0.813843	0.73947	0.380282		0.810083	0.193993	0.456494	0.660749	0.599154		0.552462			0.555933	0.647509
0.55707	0.759987		0.277979	0.43518		0.368255	0.842097	0.376786	0.735161	0.584963		0.824569	0.828267	0.227741	0.852167	0.847896		0.646832			0.914032	0.773064
0.579208	0.680609		0.636796	0.513428		0.850796	0.575376	0.750206	0.799925	0.531808		0.863756	0.424873	0.797781	0.779473	0.669105		0.344158			0.654594	0.667383
0.502911	0.716497		0.492899	0.611982		0.847311	0.531484	0.647502	0.771702	0.826479		0.797342	0.54189		0.74853	0.838441		0.60489			0.636762	0.301373
0.575473	0.743708		0.368105	0.66121		0.760483	0.737741	0.612371	0.742304	0.8058		0.951454	0.491275			0.635962		0.874217			0.908695	0.534315
0.805353	0.680535		0.5853	0.645391		0.816623	0.918573	0.776476	0.45887	0.753422		0.85601	0.518316		0.51336	0.496072		0.908997			0.694943	0.460128
0.556027	0.607054		0.241287	0.589456		0.703951	0.745594	0.660357	0.32407	0.355561		0.618606	0.766244		0.947987	0.552327		0.692199			0.862261	0.498971
0.615586	0.518878		0.564579	0.71337		0.619312	0.827606	0.819966	0.171389	0.605495		0.816982	0.621946		0.885019	0.601554		0.514535			0.747714	0.744009
0.361993	0.54702		0.610895	0.571573		0.893142	0.300095	0.525049	0.603004	0.612332		0.29983			0.719507	0.793362		0.329966			0.468004	0.469147
0.668146	0.686961		0.48194	0.662649		0.911999	0.786366	0.636824	0.807835	0.508915		0.766542	0.760481		0.629751	0.341161		0.888246			0.607595	0.636267
0.714367	0.604068		0.690207	0.560939		0.718642	0.549578	0.558386	0.839464	0.892568		0.82021	0.731071		0.794606	0.728213		0.731088			0.512257	0.85736
0.500015	0.795789		0.639909	0.440539		0.829091	0.578208	0.838997	0.671257	0.385373		0.825659	0.720679		0.270198	0.807246		0.637888			0.68742	0.465719
0.799076	0.887483		0.607078	0.433756		0.468188	0.408913	0.38543	0.513371	0.456676		0.433197	0.513334		0.894224	0.801107		0.899557			0.794413	0.876308
0.483622	0.600884		0.507371	0.490901		0.874169	0.585124	0.512755	0.605793	0.830908		0.896811	0.862266		0.827496	0.560346		0.703682			0.856296	0.398158
0.337618	0.761142		0.563933	0.309307		0.872638	0.747417	0.727733	0.564575			0.814368	0.410624		0.771006	0.868966		0.396176			0.654855	0.571191
0.282577	0.854611		0.708032	0.166779		0.900511	0.7035	0.230292	0.645479	0.353972		0.942735	0.73252		0.585659	0.418829		0.359202			0.757269	0.400625
0.563151	0.743492		0.448963	0.69436		0.781608	0.487924	0.7519	0.661135	0.732042		0.302723	0.405266		0.685779	0.729029		0.913649			0.811967	0.426728
0.815302	0.870607		0.528775	0.600727		0.494868	0.690314	0.767641	0.611494	0.515979		0.833202	0.550787		0.704059	0.686131		0.889269			0.812776	0.831698
0.554611	0.756795		0.548768	0.615412		0.811007	0.346512	0.781809	0.419344	0.466771		0.786169	0.567307		0.786229	0.930766		0.394595			0.75695	0.499291
0.818667	0.524995		0.490388	0.562474		0.778276	0.796341	0.512687	0.551764	0.726477		0.912359	0.572432		0.544476	0.41285		0.476335			0.444846	0.456738
0.912442	0.620636		0.650405	0.569398		0.875598	0.525697	0.724488	0.56162	0.418985		0.800918	0.752267		0.56004	0.862612		0.817982			0.905998	0.668645
0.44984	0.707718		0.372967	0.56492		0.840351	0.631687	0.911367	0.756754	0.610794		0.851641	0.722572		0.785345	0.59021		0.864066			0.376662	0.698605
0.73557	0.646301		0.409051	0.545881		0.586035	0.618384	0.94491	0.700036	0.385581		0.476831	0.299082		0.43615	0.622825		0.912984			0.731189	0.622998
0.532215	0.60694		0.610549	0.56803		0.66996	0.651065	0.393048	0.846983	0.462413		0.744154	0.443107		0.465739	0.45116		0.850689			0.643807	0.695958
0.703847	0.935476		0.66549	0.586949		0.434033	0.870961	0.601912	0.343339	0.52388		0.779042	0.6505		0.836606	0.863941		0.938674			0.543785	0.864068
0.791583	0.765052		0.739141	0.606997		0.863599	0.628078	0.917955	0.587708	0.882227		0.927878	0.411364		0.364391	0.660852		0.798678			0.326847	0.436859
0.664564	0.473043		0.423278	0.129874		0.794301	0.836331	0.896619	0.335552	0.754308		0.917673	0.531131		0.51368	0.817457		0.791185			0.571791	0.581004
0.718832	0.698437		0.471437	0.500155		0.915826	0.367576	0.638478	0.64302	0.733643		0.827542	0.83661		0.755188	0.586246		0.714703			0.839099	0.884802
0.387441	0.907344		0.518282	0.468794		0.808928	0.621428	0.545889	0.340153	0.757942		0.701014	0.649906		0.564808	0.500447		0.760612			0.606805	0.920638
0.603132	0.791232		0.316085	0.562455		0.677722	0.678835	0.77322	0.377941	0.787732		0.89186	0.545874		0.915739	0.933979		0.730976			0.433755	0.696937
0.307464	0.902884		0.348651	0.551921		0.771721	0.642056	0.591961	0.263889	0.757881		0.665931	0.808598		0.326858	0.737781		0.689919			0.854635	0.605188
0.28842	0.66904		0.699592	0.60133		0.472486	0.697491	0.69748	0.571453	0.61134		0.887542	0.226641		0.75805	0.801952		0.649479			0.81728	0.719327
0.407841	0.383743		0.719428	0.337366		0.765156	0.58387	0.69006	0.359636	0.728603		0.849642	0.604245		0.892529	0.666388		0.379694			0.42618	0.704886
0.313717	0.619207		0.523902	0.696173		0.683856	0.8179	0.815739	0.357104	0.815258		0.449993	0.497449		0.650318	0.748727		0.505404			0.78088	0.90914
0.592455	0.919801		0.199575	0.559982		0.815235	0.433039	0.582979	0.857626	0.786614		0.810898	0.507376		0.403485	0.6896		0.318972			0.745509	0.307058
0.651267	0.806419		0.201569	0.586985		0.798229	0.736761	0.468936	0.453142	0.395932		0.527443	0.595263		0.78034	0.707886		0.869584			0.610501	0.836437
0.246283	0.611862		0.514543	0.563548		0.643183	0.705524	0.602865	0.695768	0.721052		0.346235	0.751432		0.393406	0.691016		0.954329			0.69652	0.585402
0.648787	0.558834		0.492568	0.442916		0.853835	0.461192	0.45281	0.586909	0.76179		0.805055	0.637048		0.333269	0.331901		0.885182			0.702636	0.905874
0.594794	0.818518		0.40882	0.184813		0.823434	0.44475	0.727666	0.730875	0.918461		0.903927	0.253518		0.819017	0.834651		0.940621			0.926641	0.475477
0.604211	0.706278		0.563169	0.502453		0.67595	0.704124	0.473934	0.761686	0.382258		0.834236	0.426242		0.827545	0.669705		0.90786			0.688228	0.78534
0.395981	0.452792		0.318782	0.458618		0.91326	0.795144	0.582928	0.709735	0.287955		0.671345	0.58129		0.66822	0.404566		0.640575			0.537417	0.541205
0.59411	0.502472		0.448259	0.34769		0.604444	0.603534	0.812582	0.693784	0.797045		0.816276	0.457526		0.699398	0.399291		0.723315			0.805745	0.682372
0.780462	0.658288		0.535273	0.645044		0.747619	0.694845	0.561992	0.729241	0.592563		0.811285	0.378876		0.883364	0.798051		0.77757			0.736176	0.88952
0.550979	0.45834		0.628568	0.621759		0.659076	0.520173	0.766154	0.453236	0.740112		0.87517	0.74019		0.874462	0.419547		0.791572			0.736216	0.823968
0.895102	0.394608		0.571663	0.652067		0.852729	0.385413	0.608324	0.689163	0.781068		0.912348	0.702717		0.724205	0.409714		0.565624			0.833745	0.858579
0.840816	0.441773		0.425308	0.36697		0.765128	0.809204	0.761882	0.528455	0.577697		0.757007	0.283973		0.810042	0.620575		0.499853			0.572819	0.727282
0.574911	0.894729		0.535873	0.595517		0.915026	0.516012	0.574063	0.379238	0.73076		0.877345	0.589801		0.625116	0.826922		0.618229			0.815952	0.874785
0.460644	0.775956		0.455438	0.50544		0.856439	0.5029	0.890497	0.411377	0.747039		0.657073	0.510192		0.873553	0.755019		0.641612			0.45048	0.659478
0.648472	0.63015		0.475599	0.289486		0.412291	0.528604	0.84404	0.634213	0.85192		0.447218	0.6739		0.816859	0.792879		0.703488			0.936411	0.832896
0.646168	0.801192		0.452446	0.389617		0.795714	0.429773	0.507032	0.501145	0.680915		0.623364	0.668456		0.558225	0.835131		0.896599			0.761265	0.879181
0.482409	0.505657		0.507706	0.379348		0.816087	0.658136	0.55045	0.3165	0.393457		0.558511	0.88994		0.611711	0.768118		0.794341			0.554616	0.372191
0.528825	0.732125		0.454539	0.480009		0.920878	0.39193	0.856979	0.710975	0.547343		0.711428	0.40286		0.921692	0.59192		0.897595			0.816873	0.669596
0.376363	0.638774		0.324316	0.474578		0.642404	0.738937	0.605868	0.526049	0.74279		0.85277	0.530524		0.303732	0.541933		0.806264			0.936636	0.923268
0.515632	0.765622		0.651266	0.520214		0.564782	0.776228	0.894405	0.622606	0.66805		0.782602	0.657398		0.868965	0.80367		0.798431			0.685135	0.460087
0.511082	0.700014		0.59081	0.286942		0.708403	0.887588	0.335941	0.577567	0.32883		0.534215	0.49921		0.628229	0.643247		0.94637			0.834157	0.493943
0.35139	0.236107		0.538046	0.521991		0.356792	0.674805	0.894523	0.700323	0.901138		0.440241	0.520973		0.669859	0.627942		0.672394			0.723687	0.550483
0.43094	0.544548		0.473746	0.696733		0.5947	0.570194	0.829802	0.758159	0.533078		0.949773	0.603353		0.859082	0.602861		0.761185			0.489386	0.814559
0.654402	0.481142		0.331295	0.465112		0.871151	0.779753	0.633151	0.461557	0.594379		0.372463	0.706718		0.839335	0.829351		0.328956			0.777117	0.727662
0.915955	0.834328		0.140985	0.703008		0.51227	0.642577	0.388533	0.722899	0.558583		0.738312	0.634444		0.728096	0.255113		0.823022			0.685472	0.69843
0.739483	0.969103		0.530352	0.587148		0.604775	0.394174	0.757249	0.49321	0.794567		0.384807	0.658915		0.842007	0.60206		0.93249			0.774457	0.307215
0.640971	0.72259		0.393558	0.542247		0.687762	0.689164	0.723067	0.715577	0.501528		0.678618	0.378948		0.624082	0.500753		0.729592			0.667548	0.708902
0.716211	0.610629		0.739846	0.432593		0.912447	0.785664	0.75422	0.730253	0.555127			0.676789		0.639898	0.876675		0.624904			0.6314	0.624288
0.577097	0.809608		0.683375	0.479672		0.800669	0.470276	0.826736	0.586259	0.873521			0.741879		0.779587	0.433587		0.920744			0.657681	0.631798
0.741868	0.88429		0.811501	0.158079		0.711917	0.662014	0.947985	0.677601	0.453969			0.243029		0.634141	0.765182		0.349717			0.604557	0.83246
0.63303	0.74387		0.533605	0.423632		0.903001	0.25229	0.543802	0.672096	0.547136			0.504882		0.296319	0.611796		0.599141			0.704408	0.827718
0.45522	0.515354		0.432138	0.589598		0.729255	0.494897	0.734506	0.523522	0.678213			0.510442		0.745217	0.680885		0.826784			0.792331	0.527982
0.573326	0.423		0.462204	0.506451		0.464248	0.419973	0.648519	0.320598	0.781903			0.426714		0.771165	0.664456		0.456125			0.249279	0.796887
0.715418	0.840169		0.733812	0.157723		0.812963	0.508132	0.759722	0.773683	0.541392			0.749292		0.432846	0.785956		0.421558			0.819632	0.560875
0.817676	0.860088		0.545935	0.485653		0.563088	0.748162	0.525322	0.542657	0.651797			0.782848		0.780381	0.608676		0.932577			0.78461	0.698403
0.601479	0.834445		0.516999	0.380678		0.655142	0.526405	0.842199	0.669236	0.88738			0.63985		0.893386	0.537521		0.608698			0.765943	0.68657
0.297631	0.594869		0.309552	0.442507		0.889376	0.664447	0.579651	0.679836	0.440846			0.688545		0.86048	0.591049		0.621176			0.555742	0.703361
0.507258	0.857951		0.27142	0.226608		0.839421	0.693677	0.581092	0.467854	0.701237			0.352356		0.365752	0.489788		0.748267			0.563273	0.6959
0.719858	0.470758		0.634752	0.374944		0.901071	0.500776	0.823273	0.366724	0.797585			0.692316		0.594255	0.288161		0.938245			0.642134	0.591842
0.447074	0.856626		0.571262	0.210992		0.521326	0.437687	0.66006	0.468342	0.620421			0.440504		0.492289	0.632549		0.790752			0.932837	0.73485
0.563281	0.76691		0.353584	0.540581		0.905664	0.54953	0.589222	0.783886	0.761816			0.729135		0.512362	0.590202		0.669206			0.710283	0.951938
0.334558	0.70273		0.211365	0.548519		0.848767	0.580149	0.185251	0.76131	0.388255			0.431948		0.823593	0.720656		0.867266			0.804314	0.335412
0.628664	0.701813		0.551782	0.610512		0.650867	0.604689	0.489022	0.607309	0.735815			0.792529		0.707218	0.610116		0.679226			0.797394	0.811787
0.73284	0.250054		0.390163	0.573264		0.808604	0.53861	0.684328	0.638231	0.635895			0.242873		0.664938	0.679845		0.807445			0.741804	0.334181
0.474285	0.649098		0.316127	0.559505		0.726829	0.650949	0.698896	0.614068	0.426679			0.251503		0.576737	0.83417		0.870081			0.903685	0.65698
0.684394	0.659058		0.666933	0.513705		0.687451	0.81669	0.600334	0.84622	0.548982			0.75086		0.648425	0.792102		0.717489			0.68272	0.737447
0.593739	0.758232		0.243713	0.532599		0.722749	0.581951	0.858494	0.384315	0.36742			0.624988		0.832766	0.626523		0.934802			0.708847	0.396703
0.774677	0.622721		0.514896	0.579772		0.715867	0.541244	0.837469	0.475478	0.717383			0.556641		0.562546	0.313046		0.814037			0.5369	0.509472
0.468763	0.843797		0.336771	0.716355		0.337731	0.718363	0.700346	0.829525	0.675091			0.63239		0.708356	0.585231		0.528446			0.887634	0.510034
0.368458	0.685073		0.446498	0.152728		0.930368	0.536168	0.617618	0.627117	0.268367			0.752491		0.743377	0.470506		0.586706			0.465988	0.352561
0.404838	0.659122		0.651641	0.233931		0.942078	0.607101	0.752671	0.547624	0.538773			0.718084		0.858145	0.580268		0.771965			0.712533	0.82547
0.644506	0.740504		0.16275	0.542634		0.850576	0.406516	0.658959	0.591657	0.688796			0.751337		0.896075	0.691007		0.625028			0.785164	0.668428
0.689541	0.909772			0.572266		0.91506	0.595017	0.369047	0.776736	0.635045			0.591509		0.756858	0.718321		0.831358			0.324049	0.664849
0.715536	0.757311		0.468231	0.207498		0.858285	0.469575	0.463549	0.574911	0.320432			0.554249		0.411225	0.785452		0.711958			0.550247	0.799344
0.39969	0.526752		0.786598	0.741503		0.346258	0.588265	0.772872	0.859872	0.614293			0.509524		0.812673	0.82295		0.712933			0.507128	0.342427
0.48825	0.785812		0.522368	0.579358		0.677147	0.637679	0.494825	0.739771	0.659439			0.631157		0.79795	0.807506		0.296336			0.515406	0.78326
0.564907	0.720181		0.594782	0.714076		0.497587	0.760728	0.797125	0.543571	0.28288			0.547515		0.867065	0.657123		0.893751			0.774267	0.745182
0.384366	0.587482		0.341263	0.568751		0.798626	0.448196	0.835987	0.643786	0.668653			0.501335		0.674732	0.426042		0.746197			0.529326	0.603127
0.622246	0.525681		0.418947	0.662711		0.62866	0.791021	0.784443	0.55113	0.690624			0.733748		0.513103	0.626069		0.826204			0.804648	0.801269
0.58275	0.274207		0.588928	0.538305		0.498354	0.674723	0.619647	0.504649	0.673389			0.6593		0.495468	0.465641		0.925968			0.834509	0.569957
0.714566	0.265642		0.572967	0.24667		0.436363	0.748687	0.462713	0.491939	0.657829			0.56082		0.738526	0.852239		0.941553			0.540985	0.49816
0.612183	0.769563		0.655367	0.411386		0.817952	0.491609	0.467574	0.437823	0.218939			0.758659		0.711494	0.508533		0.796768			0.466559	0.460237
0.566443	0.550004		0.331823	0.51271		0.556882	0.187673	0.570845	0.540096	0.811724			0.205298		0.930933	0.585551		0.625776			0.312308	0.897835
0.770437	0.317397		0.595185	0.659965		0.789709	0.532915	0.547845	0.773348	0.624833			0.40568		0.410918	0.42635		0.666711			0.709663	0.754549
0.505374	0.803709		0.484566	0.429124		0.666446	0.693454	0.716846	0.451178	0.401842			0.578541		0.899521	0.760275		0.70246			0.699017	0.717246
0.29639	0.697867		0.765983	0.631349		0.506478	0.668093	0.79339	0.91094	0.47245			0.575749		0.856687	0.611994		0.561236			0.733441	0.602144
0.506328	0.572128		0.637163	0.651471		0.942943	0.548425	0.631101	0.88943	0.685905			0.636957		0.779397	0.666423		0.928619			0.714732	0.814476
0.544366	0.738729		0.544074	0.245674		0.818463	0.640917	0.440566	0.619338	0.728996			0.845712		0.839927	0.731214		0.62857			0.840528	0.926866
0.573006	0.679737		0.396873	0.281742		0.35382	0.453853	0.475214	0.530656	0.81159			0.812345		0.780009	0.67339		0.575013			0.794683	0.839577
0.454001	0.674747		0.451228	0.418945		0.710619	0.692169	0.791202		0.762193			0.547212		0.527777	0.896478		0.906186			0.624136	0.895664
0.670072	0.589568		0.712799	0.506043		0.642082	0.646169	0.570387	0.588448	0.728308			0.673328		0.760535	0.82991		0.309774			0.803475	0.823443
0.454658	0.894274		0.470729	0.700848		0.487495	0.428466	0.457434	0.798352	0.823666			0.569268		0.89742	0.447599		0.673566			0.817553	0.657729
0.624658	0.35945		0.585831	0.385083		0.693131	0.900102	0.511456	0.521915	0.383855			0.433171		0.872568	0.63975		0.933111			0.531235	0.473019
0.893037	0.413485		0.495116	0.338588		0.56261	0.706705	0.672144	0.702523	0.677536			0.496588		0.847226	0.646727		0.784402			0.705567	0.631599
0.509666	0.914034		0.53871	0.586369		0.715713	0.46434	0.555493	0.758244	0.497958			0.478701		0.820956	0.734961		0.76868			0.485682	0.53583
0.514355	0.851583		0.421042	0.461151		0.952108	0.465693	0.843429	0.77096	0.65411			0.705031		0.78144	0.68187		0.690545			0.701232	0.547744
0.867455	0.470068		0.614568	0.609192		0.71723	0.662749	0.690155	0.59524	0.695662			0.585616		0.449964	0.291042		0.83256			0.734591
0.669665	0.444765		0.350775			0.88914	0.628834	0.78629	0.797658	0.397887			0.651263		0.760147	0.360859		0.727018			0.722239	0.63509
0.295794	0.200891		0.487854			0.921966	0.496304	0.68784	0.568344	0.506278			0.844616		0.804712	0.631387		0.902735			0.640819	0.594304
0.471114	0.424548		0.582726			0.881826	0.796737	0.64111	0.806738	0.399952			0.533263		0.493829	0.81441		0.39791			0.945288	0.79513
0.721827	0.833798		0.522506			0.794577	0.656306	0.380336	0.681225	0.928031			0.465028		0.452366	0.675144		0.920675			0.881707	0.712288
0.632535	0.554887		0.486524			0.857641	0.323556	0.619949	0.620781	0.712513			0.406635		0.789821	0.67473		0.964832			0.620303	0.678912
0.759006	0.767346		0.492747			0.379439	0.289745	0.292472	0.616135	0.517262			0.826082		0.481334	0.365907		0.544618			0.417091	0.568874
0.725362	0.719618		0.672339			0.86332	0.53542	0.824338	0.556739	0.537551			0.617268		0.614755	0.902371		0.861177			0.526339	0.617154
0.666133	0.663244		0.769408			0.77096	0.553168	0.769024	0.844787	0.901423			0.675946		0.763172	0.38197		0.851526			0.823872	0.709181
0.714497	0.947999		0.527329			0.788238	0.799609	0.502488	0.317077	0.752055			0.646907		0.621609	0.733943		0.382253			0.603078	0.604301
0.635397	0.890972		0.621072			0.883612	0.529528	0.845807	0.749078	0.850587			0.682177		0.867751	0.828962		0.936245			0.915062	0.800418
0.681905	0.769274		0.400929			0.9065	0.724571	0.92167	0.608342	0.632798			0.569898		0.724089	0.81809		0.917637			0.370908	0.716479
0.682209	0.733231		0.500946			0.811219	0.505122	0.253348	0.741226	0.696914			0.672014		0.84426	0.790867		0.924247			0.487137	0.651434
0.332773	0.911854		0.301111			0.738753	0.775113	0.873178	0.787908	0.673445			0.640384		0.667935	0.654283		0.406696			0.856543	0.623275
0.811838	0.445004		0.656297			0.921537	0.412835	0.677064	0.545967	0.577056			0.543766		0.922087	0.580707		0.927913			0.716201	0.757105
0.528112	0.434118		0.489929			0.413695	0.848321	0.66798	0.566728	0.462156			0.5933		0.714765	0.574596		0.929815			0.682321	0.756494
0.314604	0.697164		0.626899			0.701633	0.581973	0.778008	0.379674	0.426276			0.812454		0.439563	0.512868		0.707698			0.707896	0.886201
0.476882	0.603213		0.796608			0.467597	0.426738	0.799643	0.765978	0.692222			0.330869		0.873671	0.778294		0.666853			0.501993	0.850868
0.247859	0.736584		0.504668			0.589767	0.692688	0.917135	0.536707	0.708377			0.669476		0.697778	0.791988		0.442283			0.45041	0.66543
0.452608	0.69674		0.248456			0.938331	0.582525	0.251041	0.325844	0.820543			0.611029		0.850627	0.763979		0.397999			0.554364	0.25038
0.360635	0.824647		0.708946			0.89031	0.349672	0.560173	0.573222	0.675078			0.583222		0.354053	0.543189		0.928635			0.751223	0.92746
0.586657	0.672298		0.572043			0.899599	0.881557	0.773535	0.7601	0.584669			0.27664		0.437092	0.820525		0.816608			0.898256	0.706378
0.331418	0.461479		0.467468			0.264306	0.70441	0.727189	0.50754	0.342412			0.634097		0.321651	0.707885		0.889817			0.567401	0.796628
	0.787131		0.307459			0.893231	0.676352	0.745588	0.508138	0.328056			0.687307		0.821136	0.907529					0.470293	0.742386
0.624299	0.74712		0.462069			0.586011	0.427489	0.560037	0.885498	0.61071			0.469814		0.765071	0.827395					0.541514	0.535486
0.777088	0.644672		0.618993			0.844633	0.592521	0.242761	0.620929	0.596718			0.584697		0.643197	0.253296					0.486445	0.89261
0.606222	0.738898		0.457707			0.629905	0.74406	0.260922	0.468328	0.480145			0.641523		0.910182	0.475891					0.449277	0.765085
0.667893	0.834022		0.350583			0.654945	0.707762	0.698516	0.771568	0.41967			0.608241		0.89871	0.710537					0.783087	0.791006
0.8782	0.503341		0.376633			0.56242	0.721021	0.208668	0.781909	0.602864			0.392452		0.422299	0.746586					0.617707	0.499112
0.535682	0.871254		0.608637			0.430878	0.603896	0.517497	0.599742	0.902169			0.774059		0.943361	0.82238					0.573368	0.771468
0.578676	0.861492		0.563047			0.85051	0.5556	0.565418	0.697051	0.635639			0.55962		0.579996	0.668844					0.836928	0.524799
0.665699	0.268982		0.839052			0.849659	0.66267		0.665156	0.47724			0.679183		0.824179	0.489778					0.657001	0.683411
0.688193	0.819556		0.425673			0.705002	0.737729		0.711304	0.896343			0.703282		0.466342	0.40107					0.526138	0.655651
0.717355	0.589556		0.398902			0.673865	0.277019		0.701693	0.533642			0.230928		0.418943	0.799038					0.456943	0.759568
0.725757	0.492028		0.424948			0.445003	0.749238		0.428203	0.660293			0.753422		0.743822	0.868338					0.879937	0.657677
0.741763	0.373804		0.777011			0.911209	0.234686		0.863571	0.577006			0.685388		0.688644	0.551486					0.621539	0.240585
0.644447	0.683945		0.57593			0.685572	0.582567		0.639684	0.400848			0.759875		0.706826	0.42478					0.385101	0.8232
0.647231	0.714925		0.455808			0.873483	0.707286		0.661629	0.651868			0.743155		0.670544	0.610209					0.520743	0.723897
0.851004	0.681386		0.724887			0.835688	0.553056		0.637477	0.421273			0.593441		0.767695	0.803509					0.540905	0.545432
0.718746	0.491399		0.402947			0.785177	0.581441		0.579816	0.776843			0.497933		0.559115	0.620087					0.81845	0.517333
0.526877	0.568386		0.580925			0.902014	0.664475		0.524271	0.518086			0.725203		0.814843	0.760509					0.805771	0.764644
0.810023	0.679394		0.610551			0.736702	0.851437		0.681382	0.471545			0.853362		0.930374	0.513005					0.759206	0.714979
0.872549	0.598316		0.467556			0.907456	0.605472		0.584071	0.881196			0.663527		0.688762	0.883657					0.759843	0.78183
0.547227	0.542304		0.721563			0.67894	0.657653		0.711297	0.796841			0.567366		0.926954	0.920162					0.394656	0.675443
0.614013	0.852539		0.547862			0.770793	0.565004		0.68615	0.441476			0.651221		0.836539	0.733359					0.455498	0.734349
0.693709	0.510991		0.41194			0.656337	0.354855		0.429881	0.57301			0.396722		0.668582	0.701145					0.761156	0.475439
0.379508	0.539471		0.6207			0.839031	0.529544		0.617524	0.752767			0.714011		0.811826	0.84286					0.572638	0.61819
0.887352	0.280172		0.510144			0.731556	0.652577		0.930318	0.442648			0.905574		0.900286	0.8642					0.61688	0.394241
0.555952	0.822469		0.482891			0.544635	0.856243		0.397734	0.205541			0.736022		0.883787	0.815796					0.857309	0.428545
0.672937	0.788201		0.698079			0.726488	0.490915		0.711794	0.675995			0.741282		0.596087	0.580254					0.750513	0.719485
0.76883	0.695349		0.527215			0.359871	0.505555		0.778803	0.457456			0.642045		0.616712	0.729355					0.753695	0.689546
0.829406	0.911816		0.55443			0.781881	0.925454		0.748645	0.539427			0.813798		0.913259	0.662542					0.540345	0.688989
0.603941	0.850973		0.32168			0.327899	0.690623		0.515523	0.335594			0.526676		0.676107	0.497227					0.253169	0.835473
0.802238	0.81273		0.545815			0.753965	0.676608		0.654038	0.504608			0.166872		0.685515	0.790136					0.786329	0.72336
0.480834	0.759467		0.528049			0.814131	0.589072		0.664953	0.458869			0.703385		0.798682	0.500429					0.65199	0.70142
0.719869	0.813356		0.636295			0.869366	0.570993		0.699337	0.725305			0.634313		0.507414	0.926118					0.519077	0.569677
0.67731	0.795916		0.407731			0.633768	0.506603		0.598915	0.687273			0.328762		0.63672	0.904859					0.736047	0.911594
0.834605	0.310588		0.454298			0.850675	0.77935		0.672114	0.949305			0.650301		0.782212	0.221604					0.749626	0.771723
0.807272	0.590758		0.339097			0.804107	0.744371		0.602928	0.336477			0.447592		0.39037	0.658334					0.871749	0.496765
0.521511	0.673831		0.672375			0.591699	0.396844		0.489187	0.665861			0.536336		0.743091	0.716929					0.446875	0.587652
0.520591	0.830259		0.613392			0.937999	0.812674		0.78315	0.453901			0.357274		0.553936	0.564326					0.442186	0.640368
0.682269	0.62216		0.715528			0.733923	0.571977		0.574879	0.604383			0.549642		0.270669	0.764017					0.667013	0.585679
0.642697	0.771383		0.583892			0.917697	0.824969		0.727704	0.798515			0.542136		0.614666	0.828887					0.587939	0.86679
0.450986	0.577817		0.655783			0.609194	0.358386		0.464897	0.717191			0.760135		0.760321	0.637796					0.313224	0.766869
0.53686	0.466815		0.41078			0.687101	0.820759		0.648454	0.255092			0.648458		0.875341	0.706438					0.821594	0.431722
0.548452	0.634229		0.467724			0.450048	0.449091		0.8055	0.780026			0.519819		0.5216	0.625246					0.54887	0.671463
0.695826	0.843098		0.5668			0.903016	0.880152		0.798307	0.689359			0.209913		0.764511	0.530708					0.314591	0.547537
0.533011	0.662283		0.400685			0.64139	0.339776		0.477023	0.362601			0.528045		0.54185	0.549468					0.671016	0.518846
0.736346	0.782689		0.486291			0.835177	0.812062		0.710746	0.55878			0.699861		0.491462	0.73963					0.737009	0.815708
0.50075	0.599678		0.71089			0.82518	0.511393		0.673158	0.36951			0.72514		0.631236	0.821108					0.640226	0.894255
0.445463	0.718091		0.425465			0.746267	0.659335		0.75608	0.830916			0.236096		0.564876	0.558264					0.668262	0.414716
0.647738	0.665249		0.510344			0.841131	0.590252		0.472061	0.502998			0.544946		0.664313	0.680418					0.611891	0.890531
0.656944	0.677695		0.665838			0.620057	0.695668		0.685111	0.694295			0.64244		0.697392	0.469671					0.552422	0.685627
0.569324	0.666477		0.52171			0.785375	0.661083		0.531525	0.451337			0.661618		0.703908	0.590104					0.546977	0.619398
0.45594	0.406884		0.494093			0.587138	0.149382		0.817298	0.63616			0.763182		0.809496	0.87397					0.680448	0.723357
0.57181	0.620977		0.372429			0.808159	0.770452		0.69637	0.284588			0.63912		0.895781	0.585949					0.552864	0.730094
0.431815	0.73873		0.434842			0.804061	0.647769		0.755888	0.526789			0.213111		0.736428	0.662316					0.766693	0.671722
0.71487	0.908744		0.507826			0.881834	0.612882		0.740066	0.536027			0.497411		0.478732	0.528849					0.486815	0.781189
0.839497	0.585857		0.684927			0.516001	0.7397		0.648677	0.768566			0.671892		0.837142	0.760731					0.682142	0.455985
0.826356	0.423239		0.679944			0.866964	0.66917		0.510894	0.542992			0.710991		0.700507	0.755249					0.693474	0.866568
0.561029	0.850147		0.566753			0.873051	0.390556		0.646182	0.431049			0.556287		0.663829	0.50883					0.510754	0.898737
0.544882	0.642079		0.445776			0.890052	0.766593		0.710041	0.644462			0.746959		0.52033	0.85269					0.636578	0.827185
0.745126	0.388898		0.68663			0.793127	0.5589		0.453036	0.567317			0.510437		0.91954	0.710437					0.5347	0.465801
0.788766	0.632443		0.591053			0.846911	0.700978		0.833487	0.454262			0.747922		0.542376	0.323931					0.438927	0.552546
0.660766	0.603692		0.415217			0.587737	0.495256		0.834666	0.412665			0.365442		0.726704	0.571838					0.542151	0.850214
0.553668	0.813454		0.299815			0.895001	0.21035		0.749595	0.537367			0.749235		0.787673	0.611703					0.47717	0.887537
0.518881	0.692405		0.557551			0.40897	0.579341		0.705067	0.244516			0.563728		0.757113	0.640982					0.566109	0.578179
0.764304	0.450768		0.412364			0.916057	0.810183		0.556005	0.677276			0.409256		0.238035	0.311125					0.564988	0.911988
0.743157	0.801649		0.776133			0.834377	0.912977		0.775774	0.629746			0.168654		0.62237	0.673492					0.558843	0.401629
0.78304	0.541591		0.47897			0.564961	0.214701		0.796978	0.718998			0.198186		0.733728	0.572087					0.294176	0.355412
0.560138	0.474341		0.713941			0.935501	0.72691		0.693134	0.499712			0.523083		0.681159	0.725336					0.766546	0.469659
0.56522	0.736814		0.678781			0.464062	0.775866		0.480316	0.51291			0.721117		0.337098	0.741322					0.500024	0.550492
0.841315	0.75422		0.713885			0.630516	0.825541		0.687651	0.776916			0.517841		0.317818	0.737794					0.494028	0.66383
0.827139	0.748865		0.675975			0.449363	0.785457		0.719869	0.262924			0.664353		0.475059	0.629853					0.778614	0.22254
0.554676	0.706778		0.485605			0.815588	0.683697		0.635529	0.829879			0.651428		0.679546	0.33444					0.666548	0.393606
0.549251	0.406239		0.550127			0.615705	0.606342		0.620984	0.826062			0.441573		0.558967	0.347308					0.871464	0.606247
0.250696	0.723303		0.582034			0.77001	0.840938		0.682255	0.588788			0.23583		0.575058	0.793307					0.672761	0.516934
0.513098	0.621525		0.357538			0.871117	0.682619		0.665225	0.534913			0.413235		0.320739	0.665085					0.800514	0.815683
0.683377	0.660434		0.83889			0.682815	0.703744		0.86073	0.797478			0.231383		0.678456	0.792227					0.39447	0.670474
0.622976	0.735112		0.785754			0.913395	0.707084		0.739427	0.543164			0.484477		0.679746	0.833415					0.748248	0.80995
0.634987	0.357957		0.698207			0.632268	0.838612		0.636227	0.758098			0.711088		0.519856	0.280924					0.894881	0.291334
0.730854	0.696744		0.627474			0.719826	0.626841		0.710134	0.804269			0.281894		0.397173	0.604181					0.603689	0.409718
0.762224	0.596545		0.604285			0.836038	0.447927		0.548582	0.524607			0.489297		0.289972	0.842087					0.536634	0.904069
0.679961	0.484581		0.441681			0.342071	0.495055		0.710665	0.480753			0.425678		0.775251	0.891346					0.499741	0.424336
0.26263	0.455839		0.625783			0.571556	0.707544		0.237652	0.297931			0.316551		0.785192	0.640025					0.515757	0.944545
0.755952	0.905838		0.436236			0.780604	0.887793		0.753626	0.885326			0.349982		0.871834	0.829662					0.700194	0.844447
0.576053	0.685109		0.296825			0.910852	0.857978		0.881411	0.794318			0.662492		0.909492	0.344825					0.722984	0.704621
0.557622	0.553613		0.29257			0.799701	0.8397		0.729266	0.373379					0.938982	0.406954					0.507791	0.648612
0.675186	0.7191		0.603589			0.687439	0.579408		0.823417	0.817917					0.727734	0.630182					0.619398	0.697418
0.722897	0.903631		0.423953			0.43718	0.75755		0.767005	0.707824					0.924611	0.544777					0.464871	0.570573
0.815173	0.62294		0.711904			0.786141	0.638031		0.431702	0.743375					0.830785	0.786436					0.571695	0.343866
0.816016	0.734046		0.21535			0.589284	0.816248		0.75443	0.592833					0.82676	0.469076					0.484153	0.435812
0.841706	0.629334		0.621338			0.853983	0.570728		0.731394	0.496765					0.61375	0.824989					0.687272	0.856728
0.348616	0.844326		0.733907			0.772875	0.658228		0.558136	0.571712					0.399578	0.702534					0.460564	0.715591
0.544574	0.521736		0.555931			0.685927	0.499843		0.601933	0.630491					0.817024	0.59345					0.838704	0.648914
0.781443	0.703505		0.602988			0.677221	0.924612		0.303918	0.391388					0.653672	0.613161					0.774749	0.64742
0.628441	0.239132		0.51269			0.632553	0.579787		0.485016	0.69003					0.457696	0.890451					0.905927	0.82295
0.574487	0.807994		0.467214			0.910414	0.692276		0.367463	0.624046					0.852233	0.821508					0.629406	0.680047
0.852173	0.719309		0.613851			0.949862	0.750904		0.533974	0.733056					0.642856	0.377455					0.916809	0.843205
0.49034	0.544026		0.276981			0.835621	0.794073		0.693591	0.653919					0.823397	0.636972					0.630919	0.760287
0.711867	0.310021		0.549703			0.825425	0.238032		0.44252	0.731382					0.55896	0.774013					0.536558	0.551744
0.781592	0.721634		0.554898			0.880099	0.652379		0.515159	0.790553					0.687782	0.85646					0.814506	0.574953
0.651627	0.814267		0.541124			0.882925	0.866144		0.729585	0.661061					0.619663	0.387559					0.546413	0.770044
0.514433	0.350117		0.487338			0.558715	0.523958		0.821545	0.416993					0.503762	0.560651					0.729711	0.403528
0.513962	0.594641		0.439397			0.74231	0.793343		0.573915	0.78973					0.733999	0.876018					0.73276	0.773111
0.906823	0.537243		0.54261			0.734905	0.585301		0.544258	0.211036					0.848505	0.546473					0.699355	0.596632
0.583417	0.56518		0.538849			0.848104	0.403049		0.807621	0.686969					0.808208	0.636668					0.565904	0.804626
0.646813	0.262987		0.66931			0.811541	0.471608		0.621073	0.708304					0.42712	0.569428					0.893611	0.6949
0.738368	0.898399		0.567971			0.4061	0.351683		0.428395	0.606031					0.828755	0.480057					0.547375	0.813526
0.636859	0.908161		0.300245			0.741021	0.653376		0.473069	0.791314					0.618857	0.648776					0.780152	0.689035
0.580196	0.471447		0.319362			0.87096	0.829174		0.470695	0.638428					0.479103	0.540704					0.483552	0.616063
0.521059	0.903677		0.386406			0.568639	0.629508		0.789903	0.656383					0.840988	0.679285					0.808488	0.512064
0.620285	0.832586		0.233574			0.869729	0.671662		0.553574	0.454983					0.833116	0.229416					0.458507	0.572411
0.667758	0.597547		0.547979			0.760593	0.197051		0.431473	0.601224					0.878479	0.810993					0.509239	0.771752
0.724912	0.535287		0.624312			0.903175	0.568421		0.735221	0.760259					0.860666	0.410019					0.813192	0.73867
0.680745	0.417066		0.381158			0.385076	0.694113		0.562348	0.715957					0.467548	0.788624					0.351331	0.689901
0.519961	0.699678		0.525574			0.273776	0.851361		0.688802	0.54443					0.900784	0.695819					0.510892	0.270884
0.816753	0.807426		0.745448			0.605945	0.471942		0.347119	0.473294					0.58714	0.931176					0.684951	0.609939
0.410583	0.384547		0.644751			0.912821	0.64488		0.765551	0.682619					0.596956	0.80796					0.735689	0.649093
0.623106	0.426222		0.494508			0.750345	0.513772		0.717855	0.515887					0.776316	0.523363					0.413066	0.780719
0.603671	0.644632		0.439734			0.620143	0.588423		0.682691	0.377735					0.695717	0.722187					0.638961	0.703539
0.598435	0.530567		0.178982			0.729478	0.674558		0.59806	0.630229					0.435186	0.733647					0.793556	0.646776
0.68635	0.741982		0.422101			0.841952	0.484971		0.758874	0.68071					0.657387	0.68646					0.71003	0.455989
0.799911	0.446685		0.510995			0.288537	0.619839		0.677741	0.702854					0.712602	0.7734					0.579765	0.716265
0.847752	0.650736		0.575816			0.521573	0.753774		0.883566	0.495604					0.688535	0.661616					0.801447	0.733952
0.646577	0.724452		0.313698			0.886679	0.557346		0.544035	0.360606					0.688693	0.704675					0.863102	0.389869
0.824696	0.736727		0.650415			0.831407	0.706822		0.809292	0.406062					0.407078	0.655686					0.478278	0.763338
0.746847	0.384921		0.51752			0.738006	0.503756		0.694532	0.613674					0.904303	0.508185					0.832911	0.913736
0.566447	0.728769		0.290475			0.851417	0.613393		0.361259	0.536658					0.508784	0.377609					0.744562	0.579607
0.731057	0.91904		0.476944			0.759631	0.719178		0.644904	0.803066					0.931287	0.714737					0.757124	0.798452
0.66488	0.491391		0.273634			0.757021	0.753161		0.701665	0.722975					0.893342	0.760704					0.627603	0.825209
0.664974	0.219153		0.433488			0.727608	0.490618		0.459368	0.876619					0.832223	0.766368					0.46911	0.409112
0.59119	0.333438		0.452239			0.915758	0.468595		0.587689	0.186807					0.511331	0.812659					0.804324	0.538094
0.684222	0.422129		0.379813			0.915441	0.42689		0.75539	0.68557					0.696493	0.901483					0.670826	0.615383
0.619352	0.502246		0.432872			0.82548	0.756426		0.692316	0.670111					0.544564	0.625481					0.65386	0.627694
0.828587	0.642538		0.673781			0.930752	0.704114		0.479093	0.292734					0.45927	0.47769					0.386368	0.415557
0.567993	0.614553		0.289916			0.884055	0.471671		0.528437	0.601942					0.679581	0.403821					0.666051	0.813005
0.714171	0.616978		0.698533			0.914575	0.691041		0.764274	0.824157					0.786296	0.732264						0.816314
0.358356	0.332026		0.722859			0.78018	0.658843		0.515104	0.410477					0.884482	0.638875						0.642761
0.539745	0.748857		0.541306			0.866796	0.644071		0.672158	0.513085					0.503792	0.621027						0.647326
0.76588	0.821729		0.506033			0.643091	0.803066		0.767769	0.443922					0.632791	0.707058						0.600841
0.73126	0.725421		0.689279			0.696169	0.589868		0.562491	0.365709					0.447502	0.68716						0.240074
0.766486	0.558353		0.561826			0.523085	0.21896		0.359595	0.292478					0.542282	0.315147						0.611303
0.801626	0.667723		0.571697			0.855431	0.391713		0.758914	0.588869					0.825152	0.738937						0.541956
0.511401	0.791387		0.646781			0.928273	0.465615		0.744275	0.584923					0.755812	0.769776						0.756819
0.533564	0.703366		0.570521			0.33318	0.653784		0.652004	0.459259					0.706048	0.671079						0.634443
0.831664	0.474858		0.455074			0.596868	0.457574		0.425694	0.61189					0.765605	0.861745						0.583547
0.744096	0.922401		0.426201			0.308851	0.749562		0.741389	0.41526					0.845166	0.639933						0.353592
0.629552	0.571072		0.824652				0.25507		0.697062	0.621716					0.773315	0.532972						0.753986
0.497069	0.583806		0.545058				0.209355		0.356261	0.645417					0.522081	0.191042						0.86505
0.606058	0.780737		0.434644				0.584263		0.625397	0.399722					0.504468	0.533652						0.63616
0.819773	0.523128		0.558248				0.593554		0.542601	0.484892					0.639462	0.712268						0.670286
0.842303	0.703596		0.510077				0.50764		0.524837	0.804964					0.508032	0.758145						0.657242
0.502782	0.614471		0.2456				0.38464		0.624301	0.315136					0.738237	0.734885						0.518954
0.820544	0.351787		0.708309						0.743966	0.757144					0.774254	0.682067						0.523576
0.742963	0.706436		0.711283						0.50309	0.491302					0.352242	0.334588						0.689084
0.449727	0.435799		0.638933						0.472259	0.654014					0.856835	0.81279						0.675252
0.557747	0.541025		0.616549						0.318411	0.294593					0.836073	0.703579						0.707291
0.661755	0.339965		0.61535						0.630219	0.450927					0.512033	0.559385						0.694337
0.53628	0.271746		0.457879						0.596663	0.530343					0.716166	0.251429						0.940794
0.884338	0.308932		0.755162						0.737198	0.672406					0.901701	0.869827						0.69693
0.534092	0.518941		0.360664						0.45541	0.580413					0.721143	0.507066						0.896661
0.840805	0.462928		0.39089						0.849104	0.634637					0.547606	0.363185						0.722293
0.531027	0.647296		0.542945						0.571493	0.640427					0.555111	0.576181						0.580265
0.514649	0.65482		0.546657						0.57755	0.404286					0.850119	0.26933						0.901656
0.433609	0.820691		0.566366						0.752015	0.454021					0.729935	0.32566						0.835855
0.77569	0.551476		0.34916						0.751004	0.258466					0.471823	0.664888						0.649602
0.784979	0.449446		0.694595						0.254717	0.526254					0.671828	0.795632						0.831676
0.655994	0.577811		0.602698						0.632768	0.812138					0.892543	0.810115						0.445589
0.606939	0.502184		0.585596						0.679645	0.304377					0.7974							0.805144
0.533775	0.479271		0.310745						0.380842	0.638371					0.563675							0.63671
0.639942	0.172542		0.721323						0.718361	0.432944					0.734961							0.612465
0.815866	0.567842		0.451843						0.679373	0.557575					0.766462							0.707172
0.784345	0.594147		0.733485						0.694727						0.492279							0.908091
0.769408	0.558111		0.267836						0.718127						0.38882							0.716194
0.830681	0.748417		0.608034						0.720436						0.707093							0.742624
0.485028	0.745494		0.756253						0.612129						0.51457							0.791874
0.660482	0.56965		0.469838						0.841817						0.813126							0.656397
0.522107	0.536687		0.389837						0.731051						0.83184							0.527547
0.428823	0.510585		0.433482						0.737639						0.433054							0.443323
0.854614	0.718409		0.567372						0.619055						0.808455							0.836546
0.450455	0.831481		0.675696						0.393505						0.868153							0.400727
0.655743	0.572483		0.395699						0.186082						0.51556							0.670845
0.652039	0.641443		0.778627						0.570769						0.836476							0.179388
0.503928	0.633737		0.611108						0.444061						0.411516							0.731721
0.505135	0.691963		0.528938						0.41825						0.707763							0.258261
0.541004	0.446491		0.775034						0.547882						0.616255							0.872251
0.839677	0.58659		0.582965						0.595318						0.495444							0.351065
0.802912	0.667884		0.53322						0.661814						0.648379							0.754285
0.460987	0.863223		0.584552						0.546196						0.795143							0.581696
0.834898	0.542777		0.621118						0.842713						0.554839							0.756231
0.785789	0.403535		0.593436						0.368818						0.777872							0.361326
0.768607	0.827292		0.776251						0.67142						0.808215							0.576257
0.79908	0.599646		0.610868						0.499011						0.689125							0.896612
0.78177	0.428511		0.571511						0.336005						0.854992							0.758466
0.519406	0.526445		0.36484						0.583298						0.278526							0.636739
0.61018	0.601495		0.362516						0.697789						0.752587							0.838864
0.532694	0.796788		0.787678						0.760114						0.907312							0.669181
0.908511	0.746024		0.42518						0.730532						0.652766							0.496064
0.870747	0.243628		0.620885						0.467752						0.707129							0.460026
0.600638	0.659056		0.298187						0.750037						0.350895							0.24823
0.560865	0.638676		0.550741						0.701843						0.686083							0.513393
0.589858	0.331428		0.40392						0.851921						0.616952							0.922488
0.599546	0.456548		0.734797						0.691595						0.861664							0.667183
0.716819	0.395109		0.611542						0.779902						0.6971							0.421883
0.74119	0.939291		0.570452						0.94766						0.749381							0.400907
0.351118	0.452031		0.649438						0.86846						0.683517							0.437148
0.738405	0.679011		0.645645						0.523719						0.7088							0.898226
0.4234	0.740589		0.393311						0.639644						0.751292							0.727413
0.795557	0.779578		0.595948						0.330633						0.897362							0.618275
0.409895	0.689647		0.636397						0.65762						0.570628							0.829395
0.425911	0.688231		0.579909						0.575849						0.246781							0.560848
0.790369	0.707413		0.460922						0.686673						0.747095							0.289748
0.572588	0.897034		0.620542						0.725122						0.419832							0.644461
0.441204	0.740989		0.645512						0.739172						0.942134							0.699372
0.624803	0.913873		0.530472						0.639739						0.441344							0.684079
0.667434	0.677393		0.320869						0.772855						0.36451							0.879062
0.382858	0.872597		0.324931						0.417469						0.785382							0.721136
0.66608	0.302363		0.531158						0.867472						0.841654							0.783851
0.867028	0.74151								0.507719						0.600551							0.72819
0.824801	0.26897								0.299894						0.864218							0.693747
0.692293	0.335001								0.58213						0.781922							0.725864
0.901011	0.584699								0.860375													0.79071
0.497469	0.46925								0.802428													0.471784
0.91612	0.822149								0.907617													0.946179
0.650177	0.737088								0.433975													0.513273
0.705422	0.944997								0.58181													0.837318
0.818791	0.911487								0.929827													0.17201
0.646177	0.468426								0.565713													0.665162
0.530788	0.245025								0.842393													0.869788
0.85472	0.468679								0.60141													0.549774
0.755815	0.943247								0.526966													0.705143
0.733647	0.492129								0.790405													0.90468
0.595324	0.378777								0.570185													0.646982
0.67694	0.659125								0.617175													0.71658
0.683411	0.196212								0.458846													0.712018
0.592668	0.806322								0.748956													0.829984
0.713517	0.885052								0.567715													0.644948
0.602031	0.928809								0.438652													0.357791
0.726756	0.827858								0.700109													0.741852
0.683408	0.795961								0.245638													0.768452
0.307819	0.590551								0.35279													0.617403
0.505736	0.59935								0.458409													0.670978
0.46157	0.935959								0.570824													0.498756
0.739087	0.633647								0.62274													0.853999
0.619079	0.798045								0.673818													0.633391
0.774468	0.600457								0.879218													0.32342
0.614451	0.912019								0.366842													0.53378
0.761629	0.924134								0.762276													0.787869
0.607352	0.871773								0.524103													0.719797
0.838108	0.524187								0.456222													0.90416
0.650191	0.695205								0.874575													0.493171
0.744748									0.407229													0.672142
0.604302									0.776858													0.517547
0.614605									0.690568													0.862185
0.858191									0.680905													0.664177
0.508562									0.756388													0.449015
0.737341									0.611787													0.345572
0.708344									0.455565
0.476811									0.522752
0.565744									0.726889
0.732152									0.517111
0.375012									0.835653
0.484601									0.731249
0.789702									0.827996
0.383356									0.788509
0.833008									0.665326
0.688232									0.602742
0.59203									0.653102
0.658992									0.569011
0.836748									0.812508
0.583777									0.809971
0.499469									0.472272
0.890583									0.588376
0.703985									0.613201
0.433686									0.57685
0.673341									0.551645
0.481186									0.727982
0.692124									0.507331
0.508829									0.912744
0.721729									0.806181
0.629838									0.622264
0.882871									0.653395
0.745377									0.791365
0.5507									0.672145
0.542627									0.688302
0.504135									0.668627
0.603549									0.781886
0.645421									0.783925
0.706901									0.487915
0.403225									0.7224
0.718707									0.598854
0.568481									0.709863
0.626777									0.624409
0.583742									0.672613
0.350148									0.615463
0.837819									0.633493
0.60807									0.779766
0.621568									0.590094
0.485538									0.659902
0.610833									0.761616
0.708172									0.478044
0.615205									0.699948
0.719992									0.738002
0.770049									0.711678
0.545447									0.853046
0.531119									0.801606
0.688839									0.747556
0.741323									0.476784
0.442708									0.364418
0.90696									0.615613
0.503238									0.552115
0.661686									0.526046
0.365877									0.818326
0.590689									0.626298
0.849252									0.884908
0.652081									0.340385
0.616745									0.676821
0.748584									0.632011
0.715216									0.786809
0.834707									0.672938
0.519044									0.523301
0.900469									0.415818
0.537592									0.663977
0.798963									0.534558
0.396883									0.753366
0.807873									0.430391
0.676914									0.910108
0.695587									0.598091
0.56623									0.717453
0.441094									0.626378
0.435333									0.417361
0.77361									0.513236
0.476842									0.871929
0.695662									0.746855
0.744339									0.709847
0.541928									0.468762
0.845627									0.769721
0.749744									0.789281
0.561989									0.66108
0.831699									0.791094
0.882675									0.378195
0.539835									0.649536
0.679451									0.765812
0.32007									0.61056
0.507611									0.509789
0.627127									0.719562
0.771466									0.632106
0.558062									0.682674
0.722963									0.731978
0.454527									0.814877
0.555864									0.625642
0.848029									0.818976
0.518616									0.751918
0.780962									0.629174
0.494455									0.87579
0.77802									0.874627
0.714147									0.579147
0.802443									0.940897
0.690061									0.810222
0.618651									0.303697
0.571559									0.634554
0.729268									0.759926
0.499661									0.704126
0.43132									0.610316
0.592845									0.801516
0.400395									0.284301
0.635432									0.58597
0.262158									0.792225
0.621548									0.733444
0.597479									0.655446
0.604707									0.768092
0.469198									0.712484
0.879828									0.694555
0.492273									0.709977
0.562678									0.54016
0.672294									0.836768
0.645035									0.769391
0.515939									0.711147
0.563422									0.561245
0.325681									0.710695
0.634971									0.832312
0.56536									0.64018
0.722138									0.909637
0.822289									0.802981
0.866253									0.696367
0.497981									0.523675
0.436728									0.596283
0.668303									0.827298
0.631982									0.467323
0.457263									0.378631
0.870845									0.388951
0.749785									0.355459
0.540696									0.570048
0.76102									0.597975
0.915329									0.44849
0.656757									0.773013
0.668826									0.662821
0.628459									0.595178
0.751281									0.482145
0.489502									0.810092
0.874761
0.770392
0.613363
0.676608
0.542252
0.431392
0.679974
0.718791
0.447715
0.87833
0.544058
0.72555
0.869483
0.719592
0.549091
0.706362
0.82976
0.536308
0.71186
0.540537
0.677721
0.773076
0.398443
0.559996
0.457145
0.702351
0.293222
0.342032
0.83386
0.554252
0.677483
0.592886
0.717233
0.500456
0.855222
0.407696
0.404493
0.740461
0.824317
0.465696
0.880318
0.374039
0.571101
0.443588
0.355202
0.493127
0.664793
0.44109
0.799315
0.591209
0.751876
0.843131
0.71317
0.443311
0.467392
0.469454
0.679416
0.692463
0.666997
0.364515
0.433114
0.677125
0.62775
0.876024
0.832485
0.531189
0.76465
0.318268
0.856917
0.661352
0.619699
0.719263
0.778757
0.414191
0.331316
0.432765
0.782119
0.485066
0.600666
0.553439
0.905979
0.414668
0.612594
0.895141
0.715091
0.725062
0.778664
0.761254
0.569053
0.62056
0.683792
0.572956
0.477354
0.508904
0.699485
0.662721
0.525144
0.672816
0.616435
0.922552
0.730603
0.462679
0.783044
0.83821
0.790102
0.871602
0.505671
0.291407
0.856265
0.493142
0.388331
0.785439
0.293595
0.472771
0.515075
0.665007
0.484169
0.318119
0.774871
0.248552
0.833131
0.692372
0.522078
0.311733
0.46195
0.83706
0.735243
0.603268
0.801867
0.799267
0.704
