# Supplementary material for: Pharmacologic activation of integrated stress response kinases inhibits pathologic mitochondrial fragmentation
Source: eLife. 2025 Feb 12;13:RP100541. doi: 10.7554/eLife.100541 (PMC11820110; doi:10.7554/eLife.100541)
Supplement: Figure 4—figure supplement 1—source data 1. [file elife-100541-fig4-figsupp1-data1.xlsx]

## Sheet: Figure 4-figure supplement 1A
Control	D414V
1.5556	1.7341
7.00479
	3.49783
2.47371
2.96082	2.84421
2.55157
3.11145
1.79927	2.70343
2.01158	4.73012
4.10388
2.12357	3.34111
	2.91838
4.7731
	2.12527
2.24469	1.9821
2.06026	1.82518
5.83905	2.21595
2.70396	4.71471
2.26788	2.6268
4.29562	3.41647
2.55695	5.99731
6.90323	1.92463
2.70599	2.00717
3.54517
3.7998
3.06085
2.58139
2.28534	4.23454
2.38318	2.99121
6.70673
2.82928	3.18782
1.63663	3.62398
1.97383	3.37161
5.4243
5.41745
7.18454	5.01163
2.15645	4.15487
2.01406	5.62687
3.10931
1.97285
2.57877
7.13753	3.03809
3.63042
7.77209	3.94705
1.9263
1.90654	2.4419
3.22847
1.87241	3.93947
7.29832	2.94348
	2.14638
1.82566	4.1166
1.8441
2.78654	3.43656
5.63931	2.94421
3.27171	4.16253
1.73924	4.54165
1.53312	3.7978
2.59495	2.12046
2.56984	5.91161
5.2966	3.26061
5.96048	2.89152
	4.30029
2.71713
2.7242	2.19328
2.60046	2.46402
1.7186	2.6156
1.80191	2.99877
2.45969
2.84111	2.98054
6.03105	2.73712
2.86354	2.63605
	2.31418
2.02998
7.57893
4.42551	3.52891
1.67018	3.14299
3.60379	1.54095
2.16121	2.09693
1.90018	2.20009
3.5273	1.72404
2.35509	0.924423
2.48726	1.62349
2.24717	3.13826
2.58218	2.56724
2.53083
2.72346	1.64034
1.88261	1.50566
1.36181	2.62126
3.24637	1.49385
1.85471	1.10184
2.50163	2.56126
2.23843	1.79346
7.08595	2.26834
2.45206	1.61281
2.07103	4.12056
6.70551	3.81876
2.00034	5.83848
5.50932	1.78662
7.82245	1.99916
2.7149	2.39952
2.3427	1.58104
5.6174	3.03644
4.92603	1.13048
1.87864	2.32847
2.93925	1.37628
	2.54425
4.74841	1.88194
3.25637	1.71901
4.78389	1.62598
	0.950912
3.62556	2.6389
1.98662	4.38968
7.65941	1.19174
2.07347	2.36684
6.54853	1.89445
2.83665	3.37852
1.79277	1.09557
	1.33524
3.2653	4.13808
	0.980438
2.288	1.20911
2.76947	1.70668
2.8325	1.78713
5.66357	3.50128
2.27656	1.123
	3.77473
3.59758	1.60479
4.27946	1.40028
3.50121	1.93328
2.43619	2.11401
1.87399	1.53035
5.43703	2.84574
3.1178	1.18417
2.38205	4.90555
2.37747	1.70461
2.39924	3.87186
4.72197	2.0082
3.45667	2.717
2.89413
2.07094	1.89451
2.86009	2.29634
4.18933	4.80376
2.64111	2.64686
1.52892	1.94178
2.42103	3.00386
2.15875	0.933868
2.18274	1.80809
7.47623	1.96621
2.967	5.03246
5.06268	2.05315
4.56664	3.31956
2.05005	3.88601
2.28165	1.68295
2.92809	1.50439
1.78835	4.77385
	1.66952
3.66774	1.46783
1.74741
1.50122	3.87907
3.72447	4.0741
1.96899	1.21481
2.58272	1.63802
1.84839	2.37878
	2.34126
1.7977	4.04101
2.18984	4.0788
6.35558	1.89524
2.54812	4.21751
1.6861
2.24796	4.11737
	3.43486
1.49841	2.95725
2.24358	1.77145
	3.79904
3.38647	3.28395
2.34297
1.83406	2.41544
1.96572
3.10338	2.28667
4.07491
	1.69324
3.75932	1.98817
3.48933	2.50969
6.99724	2.93002
2.16199	1.85615
3.62413	1.99524
1.93767	1.25343
3.35976	1.39258
2.89777	3.12215
	2.28222
2.88797	1.45725
2.96546	2.17062
5.87241	2.46825
3.19307	1.72641
2.45967	1.89777
	1.71078
	1.36119
2.48005	1.57008
2.99748	1.43066
3.27068	1.41537
3.62752	2.50401
5.4018	3.67503
3.65752	4.06299
7.5871	1.03985
3.54506	1.33644
3.07487	1.67789
2.89176	2.24309
	1.15136
2.73949	4.1931
	2.55924
2.27213	2.09596
5.81717	1.31647
2.73056	1.32715
2.64116	2.93259
2.61393	1.31773
2.33942	2.66573
	1.50548
1.93344	1.02664
5.26379	1.57024
3.55252	1.14068
5.72702	1.40861
2.59423	2.68425
2.93479	1.08064
7.94205	1.51864
5.98996	1.86951
4.73003	1.14268
2.3997	1.64833
2.87877	1.17664
4.03151	2.01876
2.89507	3.36238
2.37148	1.33535
2.90916	1.64243
	1.37829
7.28922	1.21971
3.61998	1.79945
2.52045	2.58713
	2.8736
1.49255	3.44063
2.65739	2.28047
5.66489	1.45898
3.98421	2.9157
3.60732	2.6576
3.09398	1.32887
1.96863	2.80824
2.72197	1.32771
3.99423	2.0673
5.39339	2.64568
2.5181	3.43051
	4.21422
1.76704	5.09495
	1.18114
4.62715	2.21095
3.5468	1.35893
2.20911	3.88403
3.13834	1.92669
3.44335	1.57141
1.6945	2.59673
3.19855	3.75803
2.70963	1.17339
2.6398	1.94147
2.55359	1.77204
5.18159	1.89183
5.66368	1.18026
3.67175	3.67733
6.07689	4.52347
2.22278	2.67386
6.61543	1.79122
1.86031
4.8801	2.59101
1.77071	1.8825
5.70966	1.71541
1.82536	2.65204
3.26636	1.40604
4.45642	3.46778
	1.79925
2.1256	3.82444
2.08733	2.06952
5.56293	3.89353
2.22444	2.48891
4.25027	3.31191
2.74903	3.98836
5.66464	2.89264
3.70444	2.12057
2.96973	1.88212
2.29577	1.96523
	1.14719
3.05809	2.0032
	3.65719
2.18168	1.24435
4.27281	2.20059
2.65121
4.54137	5.6932
5.19765	2.908
	1.8295
6.40942	2.44663
5.16483	1.84818
	3.46993
3.80331	3.05889
	5.43128
4.8027	2.13697
2.84738	1.7442
4.52693
2.37801	1.19428
1.59407	2.82063
2.06036	4.3812
1.89142	1.32211
3.03124	1.98901
	3.75091
7.47633	1.94006
4.52183	1.61094
	1.29074
	1.07139
2.77027	1.49245
1.81923	3.80056
1.53701	3.21376
3.37154
2.3746	2.5396
7.79901	2.51345
3.95302	1.33011
6.57652	1.52537
3.4155	3.64322
2.32985	2.86687
6.27124	1.43652
2.37135
1.54402
	1.4195
2.32408	3.3165
3.64142	1.8278
1.51851	1.54026
2.2292	1.36233
3.04095	1.54067
	2.73654
3.87128	3.54207
1.88249	3.61275
4.55224
2.72803	1.54652
2.17438	1.61497
2.18903	2.98405
3.01237	1.39337
2.95901	4.91055
2.80257	2.1839
1.67165	1.62001
3.06911	1.53692
1.72796	1.52046
1.86897	2.1821
	1.68373
2.44454	6.01779
3.40628	1.85179
6.85338	1.04198
2.25676	1.05949
2.74088	3.10893
	5.81102
3.8456	1.29758
2.91209	4.62366
3.8004	1.51122
4.73221	2.85048
3.64404	2.726
2.94871	2.47881
2.40841	2.76521
2.98939	3.61191
1.50607	1.80421
1.72092	1.7104
	4.10857
	1.43953
2.45697	1.48197
4.66845	1.71697
2.15934	1.41523
2.3709	1.65163
	5.73364
4.08511	3.14445
1.81614	1.24871
7.89648	1.74971
5.93201	1.82552
2.18311	1.52574
5.45277	2.75038
1.73772
2.2584	4.31068
2.83095
2.57784	1.94961
	2.34793
6.3597	1.98146
	1.17139
2.52258	3.21884
2.35572	1.90763
2.3636	3.9864
2.37915	2.04797
	1.37083
2.39228	1.87202
2.23267	1.93446
1.75469	3.64881
1.33209	3.05607
4.02187	2.07893
	1.9017
5.06498	1.84881
2.47021	2.20027
1.7968	3.47597
4.23866	2.58379
1.7998	2.08581
6.77291	2.98019
2.19622	5.04306
	1.60833
1.96838	1.43257
2.82458	1.90552
	2.55064
2.08301	1.60472
4.51243	2.7546
	5.31296
3.27656	1.3906
5.4454	2.30997
5.99434	2.58878
3.82644	2.3965
2.10557	1.19531
2.17672	2.43702
1.98309	1.85966
	3.89144
2.70782	2.24734
2.06235	4.3839
4.93967	2.24813
	1.28087
5.24467	2.0627
1.96479	2.93551
1.75982	5.28067
2.76119	2.93806
4.41608	2.55236
2.38282	4.70946
2.85795	1.59783
3.10469	1.96413
	2.96825
1.68157	2.40721
4.02673	2.78974
1.66666	2.33727
2.67106	3.72558
	1.45985
3.75499	1.57183
	4.93126
2.11312	5.59068
2.26272	3.017
1.47232	1.57767
	1.83693
1.77483	2.84881
1.43137	1.39628
2.19098	4.2539
1.58204	3.60715
3.07565	1.99988
2.63312	4.00757
2.88461	2.40002
3.30405	2.17776
2.07645	1.72382
	2.0773
2.17116	3.29382
3.74562	2.34431
2.63455	2.02712
7.49388	1.72108
2.37075	1.29781
2.40108	1.68093
1.94714	1.87757
3.9928	1.47088
2.32642	2.36724
1.95387	3.17944
2.15464	4.18389
3.18651	2.94027
3.16586	2.24313
2.07599	1.97008
7.84293	1.87637
6.07498	3.15582
4.96785	1.46439
2.27661	1.08709
1.92397
3.03938	3.3919
4.57098	1.79961
2.4332	1.66685
3.30835
3.43423	2.23202
3.15015	1.7888
4.88962	2.96602
2.34045	1.58327
2.36115	2.08057
	4.85886
4.71764	2.87495
2.47882	3.56283
1.94501	2.10029
2.09681
5.98099	5.05553
7.05769	2.31668
2.32264	1.15597
6.13486	1.78751
1.39028	1.8484
1.44292	1.5775
1.90709	2.55135
	2.25668
2.74889	1.47166
3.45816	3.7687
2.48017	1.45459
5.01587	1.6716
3.30028	2.36085
1.73113	2.8467
1.63695	1.60794
3.85272	4.3596
1.76596	1.68705
2.63696	2.29805
2.58348	3.03059
3.72417	2.31441
2.19766	2.53892
2.19963	5.15802
1.68756	2.60122
5.04597	1.62901
2.99045	1.22902
	2.14074
3.95288	1.01446
2.65791	2.30532
	1.70595
3.17858	1.9059
4.16962	1.11448
6.28045	3.215
	3.87782
2.92007	1.27288
2.19131	3.28365
	2.98782
7.33297	1.85883
2.91843	3.48242
2.53925	1.39035
1.78528	2.85071
1.79901	1.45305
1.22924	2.18588
3.4773	3.07274
	1.90427
7.91194	4.34011
	1.72544
2.82306	2.37753
2.80907	1.91746
2.35699	1.34039
2.122	1.34858
	2.40275
1.57444	1.50864
3.00686	1.69598
1.66235	1.21722
1.83304	2.68748
7.4085	2.23639
7.78226	1.6517
3.14165	1.36901
1.62675	5.40202
3.08673	1.24105
1.97081	2.6397
3.54998	4.01583
	2.28449
	4.85089
	1.89646
1.46037	2.58876
2.31985	2.61241
	4.9134
	1.43008
6.93144
	2.34865
	1.28656
2.09669	2.0312
4.6379	2.13561
3.58416
2.82893	1.43687
6.06322
5.33887	1.88385
1.79007	1.62139
	2.03568
4.51006	1.83817
5.34099	1.24943
2.17687	1.15492
6.06687	1.6484
5.34514	2.17445
4.47295	3.75465
1.36877	4.68173
2.18156	5.95107
2.21033
5.61029	2.88266
2.25743	1.53555
1.65879	4.90146
2.03181	1.71545
1.58488	3.86698
1.88763	3.35678
2.84294	5.49296
2.9004	2.01724
	2.13718
3.4583	2.02137
	2.06086
3.46132	5.08227
	2.15723
1.98877	1.56515
2.769	2.50134
3.47811	3.1059
	1.6039
	2.47433
2.27702	3.59381
6.8006	5.05218
4.71484	3.14456
3.89163	3.61083
3.46474	1.46134
1.55089	2.24213
3.22607	4.2108
2.93066	3.46789
2.86847	2.06383
	2.07863
2.76831
3.2901	1.8275
5.70016	1.77512
2.51779	1.63527
4.27432
1.63174	2.39658
2.99376	1.76902
6.54416	2.18232
2.98259	3.5654
1.78348	3.58421
4.59488	3.73764
1.50926
5.40282	1.9031
	2.72544
7.43776	3.08983
1.9655	1.6095
3.09444	2.89386
2.192	1.95803
2.80559	3.05623
1.5145	5.56629
	3.02827
2.40431	2.73246
2.79984	5.82958
1.71043	1.89294
2.47646	4.29011
	2.08463
5.4429	5.65722
	2.3469
2.30226	3.39387
2.68335	1.45925
2.07248
4.20988	2.07845
3.06171	5.02369
2.03248	1.45773
2.86075	2.9814
2.58859	1.6141
2.47198	1.47496
2.73791	1.54509
3.18352	2.25992
2.50751	2.04179
3.19879	5.80806
3.41519	2.23859
2.46947	2.52443
5.08961	1.31247
2.07903	1.84108
1.63875	1.40046
	1.82672
1.81897	1.50227
4.31033	4.50277
2.57756	1.53828
3.73961	6.0587
1.52012	1.62926
7.1738	2.58506
2.18066	2.2334
2.48588	2.73977
1.97997	2.52825
1.94662	2.29715
7.61915	2.08373
	1.7098
1.89232	5.3276
	1.13898
3.45944	1.18628
2.83695	5.82753
2.08691	1.68731
1.63565	1.35721
1.4864	1.26396
	3.78923
4.38474	1.96422
2.15638	5.20667
1.55911	1.78512
6.23141	2.21561
1.8022	1.69439
	2.21493
1.60905	4.93198
2.92505	2.69642
3.33107	1.58208
5.58751	3.4715
1.38362	1.50947
4.64272	2.08591
4.57269	1.25674
2.45386	2.11535
1.65622	2.70491
1.67746	3.89326
1.95664	1.9893
2.76101	1.99693
3.35612	1.75525
2.16423	1.25193
3.6042	3.44839
4.42696	1.32269
2.4662	1.87687
2.10986
	1.21736
3.63121	1.72621
2.68995	2.8483
	2.20842
4.54871	2.38661
	1.7969
2.58347	4.64741
2.70699	4.17058
	2.68917
1.19332	1.53533
3.14571	1.3904
	1.28549
5.03173	2.52275
4.65606	2.72324
2.11683
	1.79925
2.1598	4.0376
2.00286	2.6373
2.70641	3.92059
	1.25877
5.27605	2.50045
5.43921	2.39783
2.30103	1.33087
1.73872	2.54851
3.65845	1.64733
2.58559	2.49294
	2.83327
	3.17831
3.43723	1.72499
2.02989	1.74789
2.90006
4.2229	3.04316
1.98093	3.42814
1.88545
3.08148	4.26706
3.32808	1.79784
2.57224	1.78879
1.72663	2.07919
2.17907	1.2137
1.4365	3.38675
3.42137	2.06821
2.59759	2.20839
2.23051	1.68136
3.31327	1.7064
2.34882	3.71848
3.21386	1.52376
1.61921	2.15223
1.88921	2.30127
2.14781
4.75212	1.49167
1.5282	3.82726
6.93205	3.59726
	1.68024
6.272
	1.96884
2.50772	2.28351
2.4848	1.76715
2.54105	2.37493
	1.17913
	1.98171
2.70979	1.58586
1.96796	1.47743
5.49516	2.04026
2.11388	1.58556
1.44566
5.94928	3.73714
4.63158	1.98809
4.59164	3.71969
2.55833	4.68897
2.80849	1.8673
1.84804	1.90445
5.78198	1.60607
4.27039	1.32143
	1.22956
	3.11102
3.479
4.51756	4.915
4.0743
4.12927	3.46576
4.80101	1.90433
6.62513	1.29432
2.04527	2.67184
	5.61447
2.70531	1.94304
4.68057	3.55514
3.29642	3.09904
3.16655	2.04896
2.74834	4.1547
3.08733	1.43742
3.61431	2.73022
3.11237	5.02402
4.35964	2.26799
3.64262	3.44268
3.76928	1.2828
3.56821	2.20486
2.2395	1.77117
3.3127	2.53028
1.99779	2.90272
5.06964	3.11553
3.14716	5.26675
4.63906	5.36219
2.53208	1.46514
4.21842	3.21102
3.02812
3.69633	1.37269
7.08565	2.9659
4.335	2.70532
4.21564	3.6204
3.98207	2.58973
3.47443
5.39343
6.43031	6.00972
2.22624	2.98954
3.01497	3.53498
5.82991	3.83119
5.00981	2.72056
6.21159	3.41475
2.6165	2.35495
	2.05957
2.8389	1.43776
	5.82059
4.71523
4.59677	2.81015
3.24336	1.76077
3.77045	1.18334
2.84161	3.94777
5.00845	4.90738
6.20683	1.99129
2.19005	2.48394
	1.57667
7.94016	1.30872
3.91777
4.19252	2.67002
3.91574	3.90281
5.31468
6.61617	2.76442
	2.53458
3.06804	2.29693
5.38834	1.62259
5.07899	3.8047
2.31457
4.49541	5.35569
7.76659	1.98764
2.58734	2.36701
3.41878	3.01633
4.41685	1.35545
2.47688	2.72498
7.72065	5.106
3.43378	1.5011
2.24507	2.30665
6.53255
3.68013	1.81767
	3.14642
4.86008	3.33294
	2.58832
4.37703	2.48226
2.21623	3.75449
4.52659	3.88723
7.7378	3.20527
2.53932
2.61916	3.0464
4.55507	5.98598
4.32193	2.14539
4.1008	3.33393
	1.74664
1.95998	2.6423
6.41526	1.24467
	4.00932
4.90407	2.24091
2.83447	1.74052
2.27618	2.58143
4.6078	4.74112
2.81262	1.866
4.05645	2.9869
3.82448	1.9728
2.74736
2.3844
2.58701	4.20895
	4.28776
2.71507	2.51488
4.89056
	1.83259
2.54803
	2.17908
1.67247	1.45739
3.15784	1.95358
2.87778	3.62302
3.84355	2.67071
2.93857	2.47853
4.99777
1.74034	1.7527
	2.53569
2.77181
2.90549	5.01847
	3.58092
2.3728	2.31544
2.33661	2.27589
4.01953	3.06602
2.56624	2.43799
	4.75599
4.2851	1.84404
	3.03186
5.27733	2.46831
5.65468	2.52656
3.6071	2.24226
	1.59855
5.46574	3.28963
3.7941
4.10002	1.70243
4.46658	4.95782
3.41162	1.71071
3.42532	3.43789
2.50616	3.36073
5.52567	1.77357
2.23825	2.68711
2.00294	1.84526
4.8571	1.90104
3.45468	1.59041
4.08026	2.11084
3.3271	1.82061
1.72298	5.63081
6.02848	1.98878
	2.45947
	3.42682
2.19129	1.76376
2.54299	1.48934
2.4996	1.85209
4.5581	2.55053
3.13	2.02401
2.01237
7.57494	2.08912
2.89943	4.54425
4.25174
2.38573	1.20969
4.31655	1.97781
4.00616	3.53896
	4.83962
3.22414	2.94546
2.35569	3.2413
3.1781	1.61301
4.33537	3.03544
4.18176	2.48667
3.94785	1.73975
3.42067	3.49698
3.84657	2.25566
3.1448	2.39596
	3.71433
4.09897	1.64257
1.51759
6.83307	1.42784
2.24673	5.2305
2.57593	1.7361
6.76498	1.46903
4.28436	1.81233
3.1896
4.95024	1.69962
4.03999
2.13084	1.49909
1.79816	2.9321
7.30858	2.37399
1.97928	3.62083
3.35338
4.53544	4.4462
3.01834	2.53619
7.30746	2.26895
5.60474
6.42368	2.61314
4.24021	4.03807
	2.21055
4.18117	1.51096
	5.06941
3.92032	2.12411
2.40826	2.24847
3.49492	2.68389
4.37648
1.93817	1.65303
1.76598	0.838364
2.01141	1.61666
3.49535	1.95518
6.55389	2.07383
2.99315	1.93525
2.9287	1.44576
3.68619	1.20186
1.73357	1.40881
7.95453	2.152
4.09407	1.88526
2.87409	1.48439
1.72689	1.88301
3.83186	2.06233
1.87791	2.0395
4.32713	3.00442
5.58498	2.06087
3.36594	1.9303
3.42872	1.92771
	1.33153
3.58303	3.75996
1.72858	2.31602
1.98523	4.54245
6.12344	1.68507
1.9917	3.10513
2.22552	1.82755
5.47967	3.52854
2.2756	4.19247
1.80519	1.99929
2.15083	2.11847
2.83735	1.96011
2.18409	1.63461
2.09737	1.69043
6.19793	3.22863
2.26968	1.83678
2.33156	1.41848
1.72522	2.84731
	1.84956
2.71327
2.90891	1.89877
3.32899	3.1167
1.89637	2.31528
1.73245	2.32018
	1.08306
	1.6811
	1.37708
7.30293	1.93453
2.56662	1.63273
4.93768	3.23068
6.91031	2.02559
3.71216	2.39203
	2.03457
2.57306
5.06992	2.30635
	2.422
	2.30556
2.51542	2.26361
2.29344	2.257
	1.36795
4.5383	3.02206
5.63832	5.25321
6.42987	4.59795
	3.74503
3.2067	1.6452
4.84679	2.43231
6.66817	1.67182
6.67889	2.49822
3.98081	1.89565
1.53545	5.12138
1.79087	2.81582
3.88787	2.14416
3.60487	1.44427
	1.78088
2.30224	1.88263
	3.01317
	1.78984
	2.18074
3.35803	3.17742
2.24652	1.2873
2.11448	1.70001
	1.1567
2.01987	2.92018
4.97995	1.0556
2.521	2.03207
2.15613	1.44735
4.34787	1.50146
2.42236	1.48045
3.55698	3.52392
3.18091	1.25907
3.0275	1.69038
5.06158	1.82054
4.07129	1.1035
4.58643	1.81645
6.44188	1.49918
1.84607	3.16826
4.20978	4.3562
4.48325	1.6668
6.45206	1.418
4.48828	1.46887
1.66385	2.67518
4.53986
3.72159	1.77434
3.48959	1.42198
6.31436	1.36472
	2.18799
5.4838	1.82065
	1.78803
4.17438	1.63325
2.79169	1.67351
2.86563	2.86648
3.84174	1.26872
	1.91509
1.91429	1.15509
2.01266	1.82245
	1.55766
3.35243	1.69106
2.46057	3.68646
1.54659	1.35634
3.44443	3.57616
	2.58932
1.80496	1.70311
4.60703	1.77762
3.44221	4.23022
6.38651	2.91307
4.25017	1.47729
1.91614	1.80998
	1.80015
2.42297	3.12198
3.19556	2.13523
1.74967	2.77017
	1.54801
2.59338	1.3493
5.82056	2.01634
2.20362	1.19274
4.55151	5.14859
1.66313	1.15957
	2.39013
4.45471	1.16493
3.90564	2.16752
	1.48065
2.62668
	1.80893
2.45137	3.40428
2.24893	1.91557
	2.68814
1.85303	1.18466
3.31281	2.56975
6.15831	1.33637
1.62132	1.36469
2.70328
2.38559	1.44962
6.03543	1.66243
4.27147	1.81903
6.54243	3.44814
2.26887	2.06117
	1.75726
	1.46837
2.6487	1.37976
6.79823	2.63099
6.27625	3.66126
	1.71967
3.86214	1.94765
2.76086	2.44453
1.64308
5.58501	2.71144
	2.60658
2.66252
2.54382
	5.59985
3.83278	1.74309
2.44859	1.51633
	2.4202
1.97321	1.78012
5.35924	2.33134
2.84325	1.22127
3.28522	2.74001
5.3633
2.3588	2.86673
5.4424	2.67786
3.64676	1.21135
2.27076	1.86558
3.22847	2.28021
4.10219	2.26495
4.90408	1.51097
	1.68016
2.37926	1.91985
4.70801	1.90594
	1.53011
5.99503	2.21159
4.18237	1.83218
4.16385	1.85768
3.07939	2.06546
	1.17248
2.05405	3.59622
5.67332	1.4911
	3.87292
1.42418	1.43817
4.95161	1.91364
	1.60596
2.81082	1.76865
3.10609	2.64617
	3.92868
5.19777	1.68341
1.9607	2.11189
1.67773	2.03632
2.48394	2.95102
3.14726
	4.27036
3.16304	1.75369
6.91879	1.31225
3.914	2.05447
1.90477	2.05066
5.98611	2.4635
2.10339	2.42833
2.84221	1.97256
	1.55315
2.97719	2.3149
2.82996	2.36539
2.88177	3.5333
3.82294	2.03943
4.70921	3.64008
1.92193	1.27598
1.45972	3.03474
	4.40179
1.75116	2.07013
2.40267	1.1427
1.90172	2.03542
5.47192	1.81436
5.36883	2.09888
2.25709	5.63621
3.3303	1.57112
5.07172	1.53285
2.46025	1.50258
5.5069	1.13224
	2.00412
7.49972	2.4397
7.95147	5.83899
2.86905	2.43406
2.17018	2.01526
4.89105	2.36438
2.63254	1.62102
3.02959	1.96244
4.73744	1.70517
6.05782
5.52945	5.4111
4.01504	1.13793
6.69333	2.55732
1.78377	2.06615
1.9547	3.49322
1.78601	2.25816
2.08965	2.10589
2.38889	2.9753
4.58721	3.68199
2.39096	2.26715
6.10246	2.0815
1.81338	1.55246
1.59671	3.32358
5.67537	1.87413
3.03228	1.59125
	2.55617
4.92865	1.98705
3.45724	2.53793
5.6004	2.68701
3.34705	1.75206
5.85424	2.01946
4.59255	3.2261
2.56143	2.13013
1.82159	2.32526
5.3809
2.56076	2.11279
2.76215	1.75615
2.89283	1.44264
	2.67441
2.1843	1.57301
	5.32014
2.54779	1.30966
2.56448	1.36871
3.00656	3.26239
3.17612	1.46307
4.1954	1.91855
2.45251	2.79523
2.27747	1.69136
2.63699	2.10519
2.6249	4.32001
4.91209	2.50417
6.66263	3.3118
3.48865	3.25008
4.8828	2.22475
	3.79827
2.44742
7.78487	1.83974
2.71233	2.37859
	2.41025
	2.52045
2.31415	1.25394
4.77694	1.68412
3.04752	5.77313
2.27838	2.67116
3.53036	1.71729
1.5288
2.95628	2.11494
2.21473	2.38652
2.9119	2.44605
2.46887	2.23128
1.90354	3.4208
5.92921	2.70401
2.04789	1.72325
1.69878	1.4454
3.17346	3.28554
1.91629	3.18277
5.26836	2.90627
1.81365	2.93909
	1.4133
1.82541	1.52122
2.30458	1.38455
	5.49092
2.58908	2.28593
2.7578	5.25758
2.08782	2.61989
1.74721	2.06297
3.28303	2.59158
1.92291
3.43933	2.37166
2.74559	1.983
2.05515	4.53514
2.43839	5.08696
4.03927	2.90433
1.99323	3.35789
2.56253	2.15086
2.56814	3.35153
3.8215	2.25181
2.48444	2.09982
7.2767
2.13063	2.2883
2.87805	1.75519
2.04453	2.39796
3.73376	1.64694
3.0741	2.65216
2.6909	2.44427
7.18758	2.31574
2.11918	4.02008
3.79429	3.52275
	2.14565
1.6431	2.47981
6.00098	2.36171
1.88153	1.07903
5.85489	3.21934
3.21093	1.20316
	1.86475
	1.39816
2.57501	1.88494
	1.75462
	1.1139
2.84666	1.80989
2.49582	2.11491
4.31697	2.06873
	4.02469
1.33153	2.14851
2.78787	2.00082
3.42037	3.25584
5.21768	2.14699
4.45575	1.82675
4.41166	2.6053
1.9497	2.22753
3.13483	2.04462
4.03424	1.62009
	1.06834
1.91161	1.49475
4.24286	0.938264
1.56963	2.61646
2.72794	1.60323
	1.14286
2.4827	3.8737
	1.97055
	1.77168
2.79352	1.13663
2.10773	1.15361
	1.52213
2.43511	5.48106
2.89798	2.86829
2.42834	2.7362
3.21695	2.15942
6.76126	3.66583
3.70949	2.3155
4.79081	2.85948
2.98994	0.942848
6.21471	1.56277
3.37209	1.37361
	2.44189
5.86365	1.76116
4.43454
	2.98058
4.4312	1.13138
2.15002	2.87742
3.45352	2.49184
5.43914	2.5833
3.74764	1.84793
3.34261	1.69941
3.86368	1.41585
2.23953	3.47812
2.77235	4.66002
	2.20904
1.96379	2.22597
3.80023	4.91346
7.15403	1.52426
1.92174	1.32928
7.004	3.89903
	2.19397
4.54192
4.69377	4.91492
1.77647	2.30997
5.03272	1.52654
3.28112	2.5779
	1.52542
4.63923	1.73073
2.66322	1.73376
3.42297
2.78596	2.0322
	2.81296
2.69756	3.35891
2.02404	1.08452
2.69202	1.62547
7.34937	2.16954
7.15044	2.20279
6.08684
7.51572	2.91563
3.97706	1.63543
3.23192	1.53038
2.54398	3.9093
3.1727	2.09648
7.54931	2.14456
4.37037	5.22967
	2.23927
6.62883	1.4166
3.66344	3.69057
1.91994	1.95876
7.60696	2.851
2.11272	1.78532
2.57145	1.98621
2.02736	1.01884
3.38458	2.21079
3.96761	4.27554
3.07324	2.18133
4.90125	1.84361
	0.918923
3.54914	5.8817
5.53374	2.15857
2.40837	5.98026
6.62638	2.66195
	2.99413
7.77632	2.15593
5.9487	3.03689
2.78412	5.26066
5.29269	4.65238
2.13027	1.98548
	2.2657
2.04237	4.76149
2.53745	6.01124
2.94063	1.60369
5.11703	1.32023
	2.35838
	1.44957
3.1692	2.82265
	1.99005
6.21975
	1.90773
2.79825	4.04543
3.79063	2.52313
4.30415	3.2219
2.1805	1.1508
1.9988	1.02232
6.10933	2.49502
	3.30299
3.2995
2.47717	4.92657
	1.65977
	1.75667
3.49731	2.25424
4.41968	3.03046
2.63561
1.73009	3.60357
1.89041	2.78032
2.02004	2.20055
3.02052	1.61441
1.81146	5.08712
3.27435	2.43388
1.86198	2.21124
2.97295	2.26297
2.72332	1.33849
3.21566	2.50631
3.70179	2.64763
1.97601	1.3663
2.24275	1.96185
2.93429	2.15068
6.87729
2.35317	1.40186
4.83412	1.8757
2.39281	2.13478
1.99705	1.53026
5.17039	2.2161
2.40786	1.30407
2.71536	2.1555
3.26353	2.015
3.89544
1.89842	1.86261
2.42153	4.66722
4.24823	2.2216
7.28922	3.0878
6.04936	5.44919
2.87222	3.17953
1.98582	4.29245
2.63408	1.39356
2.72142	2.2068
2.37398	2.50312
4.86785	1.33816
7.50515	5.55611
2.49223	1.73337
3.13603	4.03593
3.99336	1.16841
	2.37874
1.73687	2.04247
4.70506
3.34486	3.75215
2.13554	1.3976
1.98582	1.72104
	1.58061
2.59472	3.2419
2.93953	4.24503
1.70184	0.917287
6.26323	2.72015
	1.33896
7.73931	3.327
1.80637	1.60785
2.50227	2.15308
6.37656	2.69398
2.49811	2.62576
1.73706	2.22563
1.75377	3.61724
3.45562	5.22418
3.31209	3.30044
3.61423
5.47758	2.02395
4.37115	3.94072
3.27879	2.6218
3.46475	2.45461
4.60464	3.4647
4.16793	2.17668
2.64625	1.43345
1.8873	1.21143
	2.04546
7.36873	4.88638
2.71217	3.30433
2.83858	5.68114
4.25019	1.7978
	1.75517
2.65449	1.85944
7.33884	4.59867
7.23058	4.6541
3.27723	2.63126
2.49709	2.71236
2.42733	2.31693
3.40179	2.57771
4.02266	4.1886
3.63982	2.48795
1.57114	1.98906
	3.95624
5.39378	1.97441
7.12355	1.83973
	2.82133
2.15596	2.2207
7.13109	1.93913
	1.37716
4.37371	1.75785
2.14451	1.8027
3.31733	5.60583
6.84256	3.78224
	2.24841
3.51156	2.11911
	3.98115
	2.53608
2.92169	2.35397
2.30729	1.86583
6.54352	1.71399
2.86866
6.66872	2.92963
3.80495	1.63111
3.18335	2.73627
6.62971	4.938
	4.79806
2.37405	1.5555
	1.88088
3.19245	2.1898
4.16662	4.77077
5.03045	4.26153
3.83798	1.82192
	2.69136
1.72878	1.95175
2.1739	3.2178
2.34147	4.32152
	3.01782
3.56852
2.21016	2.09914
2.58509	2.53655
2.80224
1.52656	3.19625
3.95028	2.6257
4.19675	2.08237
2.2291	2.17404
1.56018	5.09969
3.97635	4.96745
1.69744	2.04866
2.65509	2.18118
4.123	1.29097
2.9731	2.48975
1.85921	3.50514
2.82513	3.18743
4.25839	2.32198
2.48713	3.13071
5.24236	3.1846
2.8985	2.89766
2.18266	1.82095
1.94261	1.3786
2.00956	2.24232
3.0926	1.89503
2.11216
3.18428	2.99097
1.86358	1.74684
3.07215	1.95436
3.32273	1.70482
3.24405	1.62955
2.78226	2.14338
6.87603	4.57639
2.4631	2.33138
1.86886	5.12544
3.76898	2.47525
2.54148	2.03827
2.25518	2.29688
1.88435	2.59119
3.68336	1.05533
2.72058	2.0941
2.50791	1.99437
2.672	1.93526
3.51297	3.36974
4.20378	2.10999
2.53197	2.3737
2.44534
2.50315	2.55798
6.11845	2.45849
2.18334	2.04174
4.95991	1.73085
5.94806	3.13879
2.13798	3.04047
3.47221	4.28704
2.72122	2.5768
2.20619	5.21358
3.83881	3.67134
	2.58326
2.78993	5.82484
2.34353	2.85042
1.38656	1.81473
1.73658	1.58218
1.60864
1.86972	2.48833
3.26941	2.37111
2.02596	3.64654
1.9843	1.91058
1.90541	2.05504
4.35581	5.39365
2.01828	4.1156
2.19331	3.25398
1.98802	3.12838
1.6171	3.38699
2.22169	2.30714
2.38025	2.15374
2.75327	2.26717
3.65946	3.14638
1.65492	4.66246
2.8079	2.39465
1.66286	4.41097
1.63332	2.45652
2.35827	5.05917
3.26394	1.86601
2.15701	2.0395
1.78418	2.71303
2.04741	2.19815
2.77018	1.59589
1.79175	2.06876
1.70036	4.37583
2.07393	3.77122
1.6723
2.11556	3.99596
1.9301	1.7949
2.34241	1.4324
1.60184	5.24696
2.22785	2.20859
1.6661	3.6881
2.34079	3.66168
1.8486	5.27277
2.35105
2.29693	5.151
1.84092	1.67798
1.69936	3.13618
2.24645	1.56725
2.2533	1.72089
1.72927	2.02178
1.56506	3.14023
2.20856	3.93684
1.60207	3.25667
2.60277	2.40035
3.44798	2.56584
2.44471	2.58582
1.49474	4.37152
2.90248
1.81425	2.58134
1.68781	2.03526
1.7961	1.62001
2.36968	3.27868
2.47091	2.23679
2.23955	1.34969
1.96797	4.48471
1.57016
2.37078	2.93394
2.29717	3.3315
1.59366	2.91599
2.19309	2.55849
1.92242	2.23003
1.79409	1.92606
2.08018	3.11839
2.37752	3.39367
2.15264
2.21361
5.74981	3.61308
1.70523	3.76098
3.51227	2.00608
3.65966	3.26704
1.72156
2.07858	2.98925
2.13526	1.66806
1.84808	3.40662
	3.99496
	2.93714
2.85718	3.38658
2.03837	2.05716
3.94138	2.28571
3.15201	1.80754
2.47635	3.92423
3.4502	2.53217
2.11416
2.55377	3.88931
1.7901	1.82992
2.00298	2.1527
2.69275
3.33423	1.84502
2.65702	1.94151
3.4161
2.76589
4.2562	5.05196
5.42293	2.0351
2.80051	1.31404
2.68852	1.89886
2.91607	5.78986
3.27222	2.90036
2.17398	3.98486
2.40324	1.72758
3.21314
2.17058	2.41751
2.10913	1.69856
1.9846	3.55826
2.73092	3.09553
2.49636	4.86574
5.73091	5.87112
	3.18417
2.63412	2.64708
3.38232	1.77857
2.55482
2.8664	2.19492
5.35921	2.48989
3.53501	2.27633
5.41345	2.50522
4.43088	6.06919
2.13631	3.57102
2.99736	2.26894
4.06709
2.39053	2.24021
2.40642	3.34969
2.29332	1.58414
2.07307	2.15205
2.93984	2.86544
3.05146	2.69881
2.34363	1.91992
3.3665	1.81026
3.59229	3.06212
1.81471	2.92753
3.0834	2.03681
3.95792	3.62495
2.89193
7.13905	2.05972
2.74184	4.45389
3.76023	3.25013
4.29459	1.90044
2.5986	2.72015
	2.35189
2.13414	2.80176
2.49018
4.53048	1.66576
2.23586	1.6647
1.52632
4.30896	2.62959
4.71104	2.45942
6.15188	4.49384
2.70753	2.80345
2.46219	2.37742
2.66856	5.50061
1.64878	2.1536
5.21054	2.38668
3.10969	1.48777
4.93016	3.31212
2.86397	2.73062
6.78224	1.95749
4.1713	2.16623
2.32616
2.43532	2.25885
2.97796	2.21919
2.18301	4.16995
3.24928	2.3634
2.8289	2.35866
2.50321	2.50182
	1.52658
2.51263	2.7957
1.73946	2.61169
2.97476	3.08439
3.57461	2.06634
2.22943	3.47534
	2.31966
	2.16601
2.83847	3.24046
2.28702	4.30231
3.73421	4.88104
4.05183	3.63657
7.63736	2.52867
3.21898
5.47014	1.89435
4.03386	3.22325
5.51654	1.64305
5.855	2.24889
	2.16119
3.18869	5.67993
1.89836	2.12104
	2.9335
	1.83548
3.24073
3.82176
3.52979
	2.14602
3.16136	2.0533
2.31199	1.67476
4.0491	2.31198
2.64114	4.35393
3.71283	2.68855
4.36907	1.6388
5.77681	5.25544
4.71982	2.76804
2.32941	5.33012
	3.31946
3.09917	5.60947
2.67242	2.7392
4.33966	2.20842
2.77156	1.90676
2.91605	2.21096
6.26355	2.1742
2.67798	1.82958
3.19031	2.7371
2.15062
7.55492	1.98965
1.60639	1.71535
6.25249	2.15331
2.09135	3.93423
2.78132	2.46434
2.74889	2.01596
1.75731	1.84882
2.01923	3.95885
3.95461	2.41017
3.40845	2.8381
6.21884
2.42553	5.38234
2.67275
	1.92292
	2.47211
6.78337	2.25227
7.67727	2.53278
5.71449	2.77841
6.05061
3.19179	2.32294
	1.81725
1.86599	4.73318
2.49538	3.79877
	2.65263
2.095	2.28127
1.97948	2.54296
	1.51898
5.55222	5.69145
	2.1167
4.20255	1.86697
1.85814	1.63563
3.53036	3.28898
	3.20874
1.78262
3.32562	2.41237
6.94089
2.40721	3.61423
	1.84594
3.23314	4.10013
3.55421	2.14633
4.50122	4.15176
	2.4506
2.43318	3.56178
3.79674	2.59485
	4.09446
6.64697	2.26585
2.41927	2.01835
2.14389	5.14922
1.80663
3.34984	5.48338
	2.81568
2.3992	5.33075
1.63856	3.87115
2.66725	1.9361
3.12302	2.01966
2.94827	6.04208
	2.13702
	1.59834
3.88594	3.61987
3.73137	2.37408
5.91805	2.01408
	1.74503
2.53614	2.66972
	3.5779
3.91267	2.1824
7.46918	3.85735
2.53387	2.10275
	2.00594
	2.78278
6.06821
6.95668	3.60745
3.34746	5.54841
1.9818
	2.11429
3.63121	2.1759
3.23048
3.38541
1.75655	2.56042
1.73648	1.76427
2.08597	2.57087
	3.44803
3.06488	2.25702
2.72306	3.02325
2.00224	3.64005
2.32968	3.9125
	3.14778
4.27865
1.98509	6.04399
	4.40909
2.68312	3.00002
1.93746
	2.39488
3.40264
	4.23416
1.86077
4.87877	2.97092
	2.47975
	5.53024
	2.99116
1.96025	1.88962
3.94833	2.45008
2.49954
4.95451	2.91324
6.3168	2.32734
	2.20631
1.55449	1.81908
2.32421	1.70979
1.93626
3.58041	3.64131
2.49829	2.31268
5.65353	2.1186
3.97241	4.5781
3.75243	4.09344
2.8266
2.47041	2.05642
4.1315	2.25006
2.10845	2.24777
2.44745	1.63906
7.16103	3.97093
2.74423	2.3401
7.29807	3.58929
4.9171
1.84256	2.46718
6.51385	3.13441
2.07617
5.35977
3.80482
2.37309	5.04582
1.43474	3.66513
2.73949	2.56258
2.20808	1.95017
1.8687	2.43283
2.39754	3.99536
1.79921
2.48611	2.34243
2.04543	2.48703
3.24302	2.18636
3.55438	2.08016
2.96165	2.97947
3.86578	3.38345
2.2686	2.4477
2.0023
3.05296	2.73333
2.11791	4.21702
	2.09669
	2.1019
3.73933	4.11541
	1.97612
6.11574	2.81346
2.30334	5.20421
2.18687	3.40035
1.95935	1.525
1.88025	2.39377
3.46631	4.33134
2.86403	2.20392
	1.84782
2.40323	3.06393
1.67604	4.0919
3.46848	4.72145
2.3821	2.90909
	2.9037
[truncated: 2,033 more rows]

## Sheet: Figure 4-figure supplement 1B
Control	D414V
0.768581	0.930622
3.73408
	2.18323
1.46087
1.54599	1.59254
1.29693
1.45288
0.999374	1.40256
1.09168	2.56054
2.40887
1.03512	1.89701
	1.60937
2.53402
	1.10725
1.22997	1.006
1.10422	1.01851
3.03759	1.16402
1.64324	2.79262
1.2471	1.44168
2.55747	2.27924
1.39425
3.90631	0.963362
1.38964	1.03582
2.23623
1.90553
1.49197
1.41013
1.48703	2.75877
1.38894	1.63838
4.16287
1.52229	1.83735
0.924789	1.88656
1.01972	1.8865
2.79371
3.24186
4.51629	3.0089
1.13056	2.56389
1.20635
1.72324
1.0533
1.29022
4.50283	1.60888
2.24972
	2.38876
1.05865
1.03478	1.17292
1.68487
1.00136	1.70549
4.36394	1.51383
	1.24406
0.742486	1.98197
0.935479
1.51591	2.29229
2.81916	1.76328
1.71868	2.68459
0.955576	2.80074
0.794143	2.31396
1.39111	1.08535
1.49433
3.29126	1.64489
3.32839	1.66815
	2.07414
1.45062
1.68956	1.3138
1.34874	1.33009
0.96985	1.34597
0.887861	1.44459
1.38909
1.49819	1.79674
3.19292	1.51511
1.40152	1.39402
	1.06207
1.08574
2.62813	1.80558
0.944786	1.77194
1.86531	0.999187
1.16064	1.21609
0.942318	1.2396
2.107	0.981771
1.10945	0.474008
1.41093	0.884242
1.15802	1.85141
1.19674	1.29546
1.34121
1.55447	0.916687
0.967042	0.736986
0.747554	1.23962
1.28299	0.731107
1.10052	0.559474
1.33393	1.42809
0.956135	0.9471
3.99891	1.37671
1.30148	0.800025
1.01052	2.1382
3.99765	2.40511
1.04986	3.13306
3.49995	1.01232
3.71137	1.02343
1.46491	1.13265
1.37148	0.84625
3.1561	1.61096
3.06744	0.594718
0.947223	1.25766
1.68761	0.711081
	1.24926
2.42822	1.07721
1.86867	0.882144
2.82088	0.978803
	0.516041
2.35074	1.52364
1.13668	2.69534
4.54828	0.639223
1.11934	1.39196
3.99729	0.981853
1.45801	1.93012
0.920025	0.560087
	0.645449
1.89137	1.97347
	0.576654
1.18034	0.690214
1.36962	0.902198
1.40498	0.930379
2.83466	1.7021
1.20095	0.600846
	1.85577
1.69749	0.890319
2.69005	0.748464
2.02702	0.98521
1.16205	1.11745
0.947348	0.79465
3.0331	1.46998
1.82641	0.564653
1.74398	2.91108
1.31782	0.903169
1.45103	1.98632
2.75914	0.990598
2.25633	1.50318
1.55839
1.05578	0.945434
1.86052	1.14962
2.01264	2.4463
1.37069	1.6139
0.757592	0.95967
1.40094	1.44388
1.1233	0.459221
1.12512	0.938674
3.79478	1.20353
1.64735	2.8548
2.90876	1.09899
2.87089	1.95224
1.04039	1.95827
1.3249	0.862351
1.66913	0.808376
1.03287	2.7726
	0.875234
1.96122	0.756154
0.932736
0.77128	2.26797
1.9853	2.11758
1.10452	0.597989
1.4161	0.792863
0.981479	1.2911
	1.28941
1.0502	2.26402
1.16255	1.78398
3.30082	1.04639
1.29573	1.57818
0.952276
1.18901	1.88573
	1.73515
0.834097	1.68299
1.1948	0.89806
	2.30102
1.78758	1.82921
1.31871
0.870463	1.4648
1.03473
1.7707	1.1387
2.15056
	1.01653
2.07012	1.14398
1.65215	1.49095
4.35089	1.9079
1.20459	0.953629
2.16174	1.04744
1.10286	0.687016
1.96539	0.740703
1.79168	1.95608
	1.16283
1.30186	0.833791
1.3464	1.05298
3.55437	1.28886
1.89936	0.880896
1.49519	1.01053
	0.94862
	0.712812
1.46217	0.828858
1.51843	0.757191
1.71573	0.751297
2.28484	1.40494
3.28952	2.3654
1.9998	2.44514
3.72986	0.550898
1.95764	0.732638
1.47207	1.0412
1.52341	1.26838
	0.65828
1.49647	2.19798
	1.43908
1.11559	1.13034
3.31394	0.722684
1.61076	0.666441
1.4095	1.80747
1.04297	0.677619
1.03657	1.40904
	0.839319
0.962289	0.506121
3.05895	0.833771
1.92946	0.631374
4.00938	0.785996
1.2654	1.65218
1.5434	0.580062
4.57229	0.8544
3.30582	0.977005
3.06212	0.628087
1.46968	0.969153
1.45113	0.668136
2.68305	1.05261
1.69956	1.96881
1.07421	0.741166
1.51055	0.927201
	0.749216
	0.689386
1.90114	0.937769
1.37613	1.28962
	1.51959
0.728027	2.04726
1.75047	1.11582
4.00871	0.835224
2.51105	1.81727
2.12129	1.43835
1.82164	0.720632
0.968721	1.59992
1.47103	0.724645
2.30002	1.16699
3.35677	1.52985
1.46867	1.5649
	2.87755
0.967994	2.33888
	0.561932
2.35016	1.1793
1.79673	0.738052
1.33758	2.27214
1.53686	1.0535
1.84834	0.790194
0.966484	1.31023
1.89294	1.90797
1.30486	0.676142
1.51062	1.01405
1.48749	1.02684
2.947	1.10608
3.49928	0.646645
2.15799	1.64765
3.4609	2.78347
1.04954	1.62856
3.07911	0.93399
0.940012
2.70499	1.36207
0.955365	1.07506
3.77374	0.874433
0.933948	1.49362
1.75864	0.739054
2.6304	1.85022
	0.900075
1.16124	2.08521
1.05119	1.10656
2.71374	2.12769
1.08095	1.36268
2.16555	1.83356
1.43914	2.34908
3.27715	1.35149
1.97934	1.09592
1.71236	1.02766
1.24237	1.00576
	0.652662
1.71307	1.14441
	2.18754
1.24878	0.685844
2.56471	1.36676
1.49096
2.42406	3.22407
2.71717	1.56471
	0.993995
3.92549	1.33494
2.6057	1.05519
	1.4275
2.31787	1.94646
	2.77826
2.85629	1.12987
1.52478	0.884824
2.72353
1.13044	0.591101
0.820937	1.53197
1.07036	2.60606
0.912376	0.745761
1.69486	1.07699
	2.21738
4.03435	1.09941
2.84353	0.839365
	0.671731
	0.572538
1.73967	0.854767
0.972522	2.21228
0.848887	1.83509
1.94845	2.96268
1.36622	1.18601
	1.52212
1.98536	0.730981
3.48907	0.863261
2.07148	2.00459
1.35094	1.44591
4.54425	0.817153
1.12047
0.841065
	0.736313
1.09957	1.96191
2.11094	1.01663
0.792894	0.821805
1.21353	0.711581
1.69096	0.77847
	1.70201
1.94843	2.34891
1.08737	2.18589
2.55872
1.40911	0.821043
1.14321	0.92345
1.09417	1.61376
1.60821	0.699587
1.83868	3.01763
1.23141	1.23781
0.898946	0.818691
1.63235	0.806463
0.936777	0.986348
0.946035	1.17794
	0.886996
1.08123	3.07631
1.85068	1.02804
3.77203	0.535069
1.23899	0.536113
1.47338	1.77696
	3.1931
2.48562	0.622181
1.73253	2.34787
2.39539	0.769927
2.8992	1.27143
2.09241	1.49492
1.25173	1.21695
1.45957	1.47402
1.73219	1.91395
0.75746	0.885894
0.834669	0.755766
	2.46034
	0.742643
1.11352	0.731504
2.69096	0.845502
1.09959	0.762793
1.30884	0.921539
	3.16674
2.19481	1.91005
0.962184	0.694713
4.41229	0.886276
3.56316	0.921434
1.0925	0.740369
3.19606	1.46
0.809068
1.06324	2.49588
1.35302
1.14344	1.05983
	1.29929
3.71319	1.08431
	0.590743
1.32212	1.80922
1.37492	0.994895
1.13824	2.75138
1.43501	1.15697
	0.738772
1.40378	0.975135
1.26856	1.00906
0.942249	1.94597
0.720959	1.56017
1.72949	1.13611
	1.1001
3.20487	0.948665
1.38198	1.12109
0.891153	2.0328
2.63217	1.34284
0.959756	1.2045
4.18532	1.60553
1.20359	2.92273
	0.823303
1.10641	0.752531
1.39866	0.933129
	1.26299
1.10645	0.797962
2.73025	1.57668
	3.28465
1.81459	0.686819
3.62914	1.29264
3.23909	1.35014
2.08609	1.30624
1.14201	0.61251
1.1676	1.37234
0.916192	0.938695
	1.82893
1.56282	1.26816
1.10553	2.52639
3.20246	1.18328
	0.695903
3.17161	1.09254
0.929598	1.77967
0.826495	2.3412
1.5817	1.4412
2.36311	1.37907
1.34634	2.73476
1.56224	0.898103
1.82979	0.995735
	1.50669
0.798585	1.40695
2.16666	1.43284
0.994265	1.29581
1.37225	2.23899
	0.755748
2.29214	0.857977
	3.02395
1.21435	2.64764
0.983847	1.91092
0.836464	0.852543
	0.999141
0.877225	1.38193
0.776262	0.675477
1.02439	2.34317
0.826653	1.88249
1.5823	1.18142
1.65857	1.87932
1.34406	1.13345
2.04324	1.23106
1.0428	0.984886
	1.13095
1.11199	1.76277
2.19895	1.15374
1.46847	1.14109
	0.890298
1.2546	0.65055
1.274	0.962176
0.961012	1.06371
2.17931	0.838322
1.12926	1.12798
0.974881	1.83437
1.15427	2.57147
1.97115	1.46452
1.71558	1.18499
1.05976	0.99108
	1.05295
3.85587	1.58559
3.249	0.685878
1.2363	0.588573
0.976956
1.71557	2.04434
2.58421	0.929691
1.37575	0.941382
2.20297
1.54369	1.16385
1.7139	0.984931
2.6114	1.72466
1.31058	0.796478
1.30517	1.13054
	2.99791
2.83677	1.47157
1.33549	2.0117
0.98934	1.09503
1.02082
3.36267	3.05257
4.58879	1.12905
1.18287	0.671712
3.29478	0.816618
0.729358	1.04415
0.731931	0.780633
1.05246	1.2854
	1.30575
1.53535	0.733495
1.36407	2.38758
1.35215	0.829471
3.03163	1.01268
1.69644	1.16398
0.816875	1.51451
0.943419	0.801853
2.17218	2.20374
0.87558	0.976389
1.52205	1.3254
1.33086	1.58559
2.10914	1.2165
1.21588	1.31633
1.32638	3.1759
0.869784	1.45612
3.28653	0.888368
1.49319	0.681378
	1.30855
1.8646	0.541865
1.39989	1.50694
	0.882408
1.74733	0.974498
2.62361	0.635023
3.47585	1.51481
	2.10503
1.66705	0.69143
1.25817	1.68745
	1.47834
3.61608	0.921741
1.45129	1.88059
1.42114	0.695912
0.991026	1.59402
0.931049	0.747407
0.640771	1.14499
2.08564	1.29049
	0.950821
4.34409	2.54474
	0.967528
1.88049	1.22345
1.66928	1.14963
1.10532	0.69867
1.1623	0.750139
	1.32607
0.811071	0.81793
1.53654	0.890583
0.935552	0.713192
0.932566	1.26312
3.57058	1.10446
	0.89014
1.98134	0.694205
0.789839	3.04019
1.35685	0.659981
1.04348	1.59396
2.09983	1.92113
	1.26732
	2.47212
	1.10061
0.758423	1.38794
1.1515	1.58906
	2.26733
	0.689901
3.79382
	1.28427
	0.643232
0.900396	1.03972
2.55853	1.0671
2.06716
1.56857	0.705823
3.72179
3.26803	0.85253
0.923308	0.796931
	1.28771
2.45221	0.956055
3.39046	0.595619
1.08231	0.567244
3.99285	0.889449
3.16964	1.16441
2.50676	1.74705
0.680308	2.43768
1.28572
1.14928
2.5929	1.54312
1.18448	0.772419
0.871208	2.30362
1.10926	0.948922
0.803607	1.87508
0.929281	1.95071
1.77054	2.47675
1.72759	1.20434
	1.14259
1.5973	1.13981
	0.937585
1.71206	3.22352
	1.13578
1.00211	0.841551
1.48385	1.30507
1.69095	1.64823
	0.850036
	1.13808
1.23894	1.96283
3.89417	3.13577
3.07089	1.55911
2.56961	1.98332
1.77943	0.815318
0.816416	1.25074
1.87456	2.04157
1.3144	1.88731
1.45309	1.07372
	1.11944
1.37975
1.78465	0.987243
3.08958	0.97809
1.43873	0.921264
2.21887
0.812483	1.42716
1.74027	0.773468
3.76904	1.19558
1.60178	1.98998
0.934847	1.71504
2.74554	2.25917
0.815846
3.16795	1.03734
	1.38981
4.60041	1.52643
0.946646	0.934802
1.88778	1.48487
1.20912	1.05965
1.73443	1.5964
0.780103	2.84312
	1.67545
1.27732	1.45031
1.72674
0.790903	1.03343
1.19	2.24113
	1.41275
3.60431	3.05497
	1.30341
1.34255	1.86616
1.63202	0.816115
1.07169	3.0493
2.61674	1.18564
1.77455	2.9953
1.00552	0.795684
1.40217	1.77565
1.13418	0.850813
1.41525	0.734239
1.81334	0.759136
1.79645	1.15429
1.50283	1.12459
2.04297	3.11187
2.30259	1.4258
1.24813	1.74003
2.64533	0.608733
1.04087	0.940258
0.894508	0.799741
	0.933898
0.983148	0.820945
2.60331	2.29395
1.33988	0.781062
2.26545
0.762564	0.987715
3.7948	1.38183
1.01703	1.18062
1.1863	1.51762
0.974193	1.31245
1.04529	1.14473
	1.23655
	0.807714
0.994018	3.0342
	0.61907
1.78331	0.63699
1.50814	2.81428
1.08956	0.827386
0.871498	0.669965
0.792181	0.621807
	2.40963
2.67375	1.16535
1.07898	2.68417
0.77059	0.903695
3.31707	1.08445
0.897268	0.947833
	1.13518
0.919178	2.17788
1.4262	1.30999
1.72118	0.781743
3.4154	2.01508
0.708871	0.786318
2.84801	1.10392
2.58018	0.590831
1.3921	1.0339
0.838407	1.52103
0.890329	2.24366
0.975209	1.09274
1.50363	0.910802
1.94565	1.02391
1.29581	0.708405
2.0313	1.94673
2.72936	0.679772
1.32004	0.941697
1.08711
	0.600875
2.20616	0.827441
1.51465	1.34467
	1.25717
2.36766	1.53768
	0.993963
1.52859	2.48991
1.18296	2.52965
	1.6204
0.652825	0.862286
1.74535	0.757478
	0.741314
2.93797	1.28519
2.64901	1.59564
1.29494
	1.01327
1.27437	2.14154
0.987749	1.62863
1.47683	2.16564
	0.722364
2.97198	1.5173
2.89196	1.28791
1.0914	0.755925
0.889584	1.20696
1.86273	0.925989
1.56383	1.23029
	1.53238
	1.68931
2.26594	0.961192
0.976525	0.984164
1.63892
2.59653	1.70487
0.838275	2.04301
0.956593
1.54624	2.14405
1.62578	0.923773
1.26357	0.986008
0.840802	1.00788
1.17991	0.628765
0.733485	1.66846
1.82409	0.977993
1.16644	1.2357
1.30431	0.837144
1.90132	0.941935
1.19725	1.93334
1.57798	0.748086
0.854084	1.2269
1.00154	1.24352
1.03563
2.66351	0.89198
0.832665	2.43195
4.131	1.34411
	0.781258
3.22776
	0.987037
1.32892	1.2238
1.29976	1.03373
1.28502	1.2482
	0.667872
	1.08612
1.65091	0.946808
0.983071	0.797714
3.50376	1.1305
1.009	0.890265
0.716585
3.42354	1.62202
2.87687	1.09831
2.51391	1.52161
1.3538	2.69592
1.44404	0.887178
0.888233	1.12784
2.93338	1.04057
2.55921	0.749238
	0.666677
	1.85167
2.27637
2.54066	2.58103
2.4929
2.06557	1.92673
3.3931	1.08162
4.01515	0.610899
1.00645	1.48299
1.36382	1.0848
2.31372	2.18419
1.7807	1.5743
1.73671	1.14055
1.57532	2.46304
1.48595	0.815713
2.24429	1.73043
1.74779	2.87985
2.51818	1.38082
2.11431	1.46845
2.25581	0.675402
2.39636	1.07134
1.31033	0.9192
1.58781	1.30945
0.982104	1.65753
2.67928	1.66678
1.67386	3.27519
2.61984	2.53773
1.29848	0.798069
2.24832	1.96357
1.6919
1.78475	0.791812
3.36811	1.49478
2.08221	1.35544
2.97073	2.35157
2.39458	1.45639
1.96374
3.16563
2.88798	3.19993
1.23482	1.42423
1.47562	2.12807
3.42627	1.95284
2.73808	1.26785
3.28518	1.91655
1.52885	1.28446
	1.07034
1.26665	0.774686
3.84528	3.28908
2.4438
2.5945	1.50368
1.87116	0.944292
1.77975	0.582552
4.54298
1.40797	2.68318
2.21748	2.56452
3.64932	1.0456
1.18584	1.36222
	0.891625
3.92828	0.711824
2.07947
2.29256	1.44738
2.49825	1.91052
2.64799
2.8854	1.4908
	1.37047
1.65225	1.06914
3.0724	0.751977
2.46515	1.98425
1.12755
2.4956	2.78956
4.22062	0.978579
1.12373	1.14983
1.81653	1.82172
2.55826	0.747264
1.2599	1.43721
4.0574	3.25322
1.66745	0.798676
1.06957	1.11658
3.33982
1.97498	0.930148
	1.59953
2.94148	2.0201
	1.50942
2.10098	1.26075
1.25206	1.70278
2.35608	2.12587
3.3736	1.56401
1.4735
1.30473	1.5874
2.53207	2.80348
2.26138	1.11978
1.93432	1.44173
	0.874066
0.949834	1.31847
3.96879	0.671648
	2.01664
2.74766	1.38788
1.72244	0.862504
1.34781	1.35386
2.51293	2.0498
1.42395	1.03244
2.3567	1.41546
2.13793	1.01487
1.32766
1.23633
1.21081	2.18535
4.49246	2.14605
1.24158	1.14464
2.73909
	0.979037
1.35945
	1.06529
0.822708	0.760255
1.51523	1.09604
1.3246	2.07524
1.93818	1.27816
1.46506	1.53421
2.1715
0.904451	0.960947
	1.3796
1.54285
1.58556	2.343
	2.10413
1.20213	1.18123
1.28369	1.30219
	3.12984
1.94301	1.49232
1.25712	1.41703
	2.66659
2.28037	0.893855
	1.79524
2.58704	1.4563
2.89147	1.13068
1.88042	1.0233
	0.763534
3.07894	1.63795
1.8872	2.83308
2.53383	0.928508
2.17765	2.53357
1.68983	0.969029
1.59943	2.35333
1.28653	1.72625
2.87139	1.00376
1.17178	1.35824
1.01833	1.10774
2.75994	1.09441
2.06217	0.825689
2.01929	1.02415
1.5517	1.05851
0.916338	2.88024
3.6139	1.04731
	1.22944
	1.63198
4.24287
1.25093	0.984202
1.57254	0.838729
1.34323	1.03953
2.65533	1.39491
1.59295	1.00084
0.967711
	0.975372
1.44044	2.64835
2.39043
1.2139	0.570849
2.19421	1.12949
1.92967	2.08624
	2.33986
1.9504	1.34759
1.04256	1.69686
1.55409	0.787735
2.55533	1.51193
2.28277	1.35826
1.96819	0.955152
1.59724	1.8273
2.43221	1.22685
1.60208	1.41108
	1.90653
2.08384	0.834455
0.707415
3.65833	0.694342
1.09616
1.12422	0.863107
3.54106	0.805872
2.24401	1.00789
2.06549
2.69553	0.95166
2.08392
1.21467	0.860448
0.930654	1.75375
4.35902	1.10625
1.00518	2.20485
1.64515
2.45261	2.17024
1.3537	1.50047
3.81973	1.30259
2.85309
3.19481	1.33595
2.20666	1.78043
	1.26701
2.17835	0.833661
	3.03764
2.26973	1.31312
1.41969	1.10395
1.95721	1.35914
2.76458
0.999792	0.9631
0.940195	0.515256
0.981995	0.841978
1.82212	1.13001
3.746	1.03423
1.45333	1.13585
1.5396	0.82092
1.74151	0.702055
0.840786	0.75695
4.52999	1.24024
2.06268	0.991894
1.52092	0.734495
0.900481	1.00309
2.0575	1.04618
1.01896	1.18372
2.24878	1.50505
2.68194	1.05645
1.86577	1.0071
1.93072	0.958693
	0.730019
1.97433	1.57973
0.879714	1.19542
1.02617	2.52896
3.53806	0.946709
1.14475	1.52912
1.27689	0.979817
2.90567	2.00847
1.27905	2.21414
0.957469	0.947339
1.10326	1.11237
1.45518	1.08759
1.09815	0.909722
1.024	0.808817
4.17554	1.75937
1.13945	1.03393
1.12301	0.840763
0.845075	1.39663
	1.00853
1.46348
1.6522	0.998625
1.94501	1.63659
1.00984	1.19174
0.859416	1.21105
	0.577617
	0.877399
	0.726067
3.7054	1.1409
1.39921	0.909322
2.97361	1.67772
3.63952	0.979103
2.09401	1.29066
	1.02697
1.38058
2.93492	1.4095
	1.25939
	1.19092
1.32121	1.11316
1.17473	1.36527
	0.714101
2.65462	1.51943
3.38949	2.85489
3.23438	2.49318
	1.89625
1.84682	0.955499
2.48617	1.25146
3.15395	0.954007
2.91423	1.30926
2.26802	1.02005
0.826391	3.02396
1.032	1.48913
2.46899	1.05425
2.09682	0.800903
	0.94697
1.08804	1.12712
	1.82307
	0.908765
	1.18506
1.80973	1.97994
1.19495	0.678062
1.05804	0.945536
	0.655869
1.17411	1.7298
2.138	0.529795
1.19836	1.0394
0.979012	0.80238
2.45261	0.808529
1.33361	0.835017
1.85865	2.19669
1.74405	0.666906
1.23136	0.946913
2.43559	0.929756
1.95249	0.598187
2.17258	1.02501
3.32933	0.905312
0.862459	1.4912
2.50417	2.42006
2.14745	0.969261
3.41964	0.853871
2.49278	0.772407
1.00739	1.45649
1.77638	3.03345
2.55507	0.900312
1.66887	0.728102
3.80057	0.761165
	1.14229
2.9985	0.926156
	0.979538
2.36719	0.792706
1.45951	0.927975
1.62652	1.44852
2.16769	0.712039
	0.997349
0.930057	0.577985
1.03523	0.949307
	0.829893
1.77742	0.861694
1.03684	1.88183
0.857934	0.733323
2.13346	1.58242
	1.49871
0.893556	0.91173
2.56455	0.930881
2.16112	2.60832
3.70499	1.63303
2.66139	0.695171
1.02694	0.944463
3.94444	0.913455
1.43738	1.70289
1.65027	1.09745
0.928505	1.52803
3.73829	0.786523
1.35227	0.747609
2.75474	1.16021
1.06673	0.648534
2.62828	3.20111
0.840158	0.659578
	1.20407
2.68669	0.682303
1.70099	1.10902
	0.769384
1.58537
	0.975195
1.48453	1.86574
1.47408	0.963471
	1.29456
0.974364	0.693518
1.69764	1.32122
3.39005	0.804215
0.83471	0.740193
1.63245
1.37119	0.783256
3.72595	0.901108
2.57296	0.967255
3.69119	2.09665
1.2029	1.03614
4.33694	0.898171
	0.752133
4.22882
1.47527	0.73221
4.10857	1.25816
3.79264	2.01147
	0.990377
2.31373	1.15649
1.38072	1.40705
0.92984
3.22548	1.52471
	1.4012
1.61539
1.16641
2.31839	0.837809
1.31668	0.828955
	1.34804
1.04359	1.09798
3.15611	1.38073
1.43251	0.858929
2.0368	1.57522
3.47287
1.16577	1.48922
2.99202	1.40063
1.81609	0.715693
1.27111	0.959522
1.85245	1.18587
2.4761	1.17381
2.62749	0.755094
	0.919571
1.19317	0.912646
3.03696	0.950304
	0.793462
4.09748	1.20561
2.32767	1.00488
2.42886	0.882653
1.69255	1.14126
	0.620608
1.32222	2.01006
2.62581	0.803835
	2.39029
0.701851	0.645221
2.48512	1.15997
	0.965692
1.56601	0.960946
1.89404	1.66757
4.2508	2.47667
3.09795	0.928227
1.05342	1.19223
0.805044	1.21102
1.25146	1.50089
1.70155
	1.89817
1.75498	0.925792
4.20473	0.762865
2.07392	1.23457
0.990583	1.17303
4.44646	1.39428
1.24933	1.4259
1.79925	1.13075
	0.842776
1.47643	1.1512
1.46884	1.22317
1.65705	2.02151
1.73774	1.22338
2.42206	1.85954
0.928782	0.762271
0.703473	1.49398
	2.01947
0.88975	1.33065
1.3956	0.598761
0.885544	1.03861
3.1433	1.06444
3.5783	1.19453
1.38153	2.80948
1.92522	0.880103
2.98314	0.927902
1.4485	0.83339
3.38289	0.697357
	1.08926
3.58604	1.3456
1.80204	1.3565
1.19957	0.998093
2.98502	1.4463
1.93821	0.865376
1.82566	1.15541
2.49917	0.838383
3.27542	3.2054
3.54431	3.16408
2.05128	0.703772
4.1892	1.73527
0.861541	1.1135
0.997686	1.71155
0.914866	1.12669
1.12981	1.17631
1.40698	1.45504
3.11592	2.26692
1.41275	1.43538
2.99329	0.942347
0.975948	0.760048
0.805036	1.56807
3.34083	1.02586
2.08364	0.891103
	1.12357
2.27242	1.08205
2.05173	1.30324
3.12431	1.42123
2.42519	0.857598
2.92033	1.23565
2.40033	1.70147
1.07084	1.12412
0.907554	1.26784
3.1312	2.95002
1.64427	0.904988
1.54853	0.872465
1.83865	0.794443
	1.33163
1.08896	0.876593
	2.75849
1.45951	0.69829
1.51543	0.682765
1.71424	1.93513
1.77578	0.930567
2.79288	1.08031
1.3101	1.81425
1.19465	0.916901
1.15016	1.20772
1.35068	2.73472
2.44903	1.20378
4.21005	1.82065
1.66077	1.82162
3.22848	1.06987
	2.16154
1.1967
3.60457	0.859707
1.48293	1.33999
	1.5363
	1.69122
1.10631	0.736167
3.10093	0.805532
1.75019	3.00382
1.14792	1.21381
2.15157	0.842927
0.857906
1.69712	1.30514
0.969004	1.48082
1.60421	1.26054
1.26572	1.20353
1.03228	2.21707
3.06748	1.78663
1.13056	0.910798
0.95403	0.764821
1.61662	1.52138
1.1	1.65947
3.49037	1.56707
0.957671	1.82635
	0.874715
0.888926	0.681747
1.12292	0.693059
1.4935	1.37804
1.2458	2.77318
1.12802	1.27534
0.887932	1.12393
1.6722	1.52431
0.976798
1.94238	1.55186
1.52718	1.08763
0.976588	2.49089
1.28614	2.21135
1.99406	1.67739
1.13262	1.53303
1.47083	1.13835
1.44626	1.58527
2.00214	1.09423
1.27861	1.21693
4.30009
1.12046	1.29151
1.44889	0.792802
1.13768	1.3535
2.04513	0.963238
1.58226	1.57891
1.57501	1.4453
4.25737	1.11344
1.1242	2.1511
2.74181	1.89936
	1.09702
0.889181	1.26649
3.46499	1.49215
1.01861	0.576611
3.08902	2.17026
1.43219	0.691115
	0.820929
	0.799386
1.49949	0.979418
	0.796707
	0.672462
1.30833	1.03006
1.24061	1.09268
2.57218	0.99604
	2.06677
0.690915	1.15726
1.49191	1.01135
1.89377	2.07434
3.28039	1.13109
2.89014	0.957792
2.8303	1.3947
0.972518	1.16911
1.63736	1.06795
2.34521	0.820091
	0.532482
1.06503	0.802377
2.30922	0.563015
0.874466	1.54247
1.25062	0.913547
4.27465	0.646177
1.30674	2.13714
	0.960464
	1.11385
1.55498	0.572641
1.09885	0.707549
	0.781499
1.37674
1.46806	1.45417
1.33728	1.73867
1.84788	1.28619
4.30945	2.19506
2.2808	0.996938
2.86518	1.43174
1.82158	0.477406
3.81979	0.83862
2.08901	0.809136
	1.30207
3.66697	1.16346
2.70413
	1.73214
2.45183	0.662825
1.31169	1.84958
2.07896	1.32602
3.68196	1.50635
1.89742	1.12033
1.4088	0.887932
2.19332	0.861214
1.19589	1.77825
1.65117	2.758
	1.06567
1.09817	1.32865
2.25716	2.4974
4.44527	0.654217
0.993572	0.702193
4.20586	2.33998
	1.12084
2.91371
2.78121	2.38836
0.984774	1.42337
3.04454	0.807767
1.9029	1.36934
	0.875973
2.50399	0.929293
1.53894	0.905935
2.22348
1.64079	1.12328
	1.48471
1.6753	1.74865
0.99572	0.575629
1.56347	0.819501
	1.09311
4.52486	1.3518
3.30987
	1.77138
2.11732	0.967914
1.95641	0.808652
1.18066	2.10836
1.77608	1.06691
	1.11804
2.58918	2.96189
	1.41623
4.18664	0.713178
1.76314	2.30153
1.07822	1.15318
3.90022	1.32828
1.26014	0.956828
1.39624	1.04741
1.02889	0.529964
1.99789	1.23482
2.40581	2.07846
1.5591	1.15991
2.97644	0.98731
	0.559821
1.95872	2.71979
3.64878	1.30609
1.52692	3.14896
4.27479	1.51398
	1.69709
4.26367	1.27589
3.84558	1.55413
1.54574	3.0931
3.16321	2.63407
1.1207	0.972837
	0.995301
1.12552	2.95323
1.39895	2.86904
1.4227	0.924564
2.79292	0.722652
	1.11382
	0.938413
1.77026	1.39251
	1.18765
3.30665
	1.03135
1.50486	2.09448
2.21684	1.40379
2.40618	1.65651
1.17117	0.581871
1.07549	0.572407
3.91538	1.3394
	1.78413
2.01816
1.38681	2.82576
	0.879096
	1.02775
2.01959	1.14385
2.80526	1.90912
1.50653
0.80955	1.87666
0.910429	1.42852
1.04612	1.33893
1.38397	0.908063
0.969618	2.90179
1.97028	1.45083
1.04597	0.995384
1.41857	1.30746
1.77625	0.704657
1.94451	1.3009
2.01725	1.47854
1.0558	0.719542
1.184	1.0307
1.39579	1.20116
4.06078	3.09681
1.31919	0.83934
2.66449	1.01908
1.16047	1.05189
1.1293	0.854743
3.43778	1.01265
1.16206	0.711599
1.4563	1.08877
1.654	1.22851
2.14205
1.06162	1.12141
1.22699	2.70214
2.58527	1.18061
4.4857	1.91495
3.43819
1.54091	1.59982
1.09267	2.75194
1.41452	0.759998
1.39225	1.01495
1.29815	1.21039
3.18905	0.725444
	2.89252
1.25086	0.976133
1.53889	2.09378
1.90932	0.656987
	1.54854
0.89745	0.997641
2.58571
2.0723	2.03525
1.11749	0.786634
0.99611	0.982493
	0.931759
1.51401	1.87908
1.3675	2.45669
0.89489	0.573966
3.81822	1.62552
	0.857436
	1.76006
1.00743	0.818809
1.38523	1.31761
3.44159	1.4707
1.42947	1.39755
0.968128	1.21339
0.87408	2.29519
2.07044	2.72365
1.83654	1.66497
2.0474
3.27924	1.05347
2.29366	1.91282
1.81311	1.46333
1.90701	1.28909
2.39302	2.02412
2.64164	1.24285
1.24347	0.773938
1.00174	0.599791
	1.16214
3.7693	2.7246
1.35957	1.91914
1.60847
2.27563	1.05458
	0.989548
1.5704	1.13844
	2.29753
4.00651	2.71008
1.97053	1.60265
1.35556	1.40415
1.20774	1.20877
2.26784	1.41503
2.53228	2.1881
2.06192	1.46508
0.785022	1.13656
	2.35957
2.87845	0.992014
4.11304	0.921631
	1.45657
1.15288	1.50695
4.04441	1.10867
	0.758812
2.62692	0.905579
1.06955	1.21804
1.8695
4.05986	1.97926
4.52365	1.25268
2.13186	1.36458
	2.14902
	1.29548
1.6085	1.27947
1.19551	0.952494
3.89415	0.849876
1.83918
4.41368	1.60906
1.99533	0.919942
1.73529	1.69006
3.78627	3.09971
	2.92409
1.2658	0.786051
	1.02808
1.96073	1.25215
2.15986	2.64932
2.88063	2.11463
2.08848	0.771814
	1.34317
0.921534	1.10865
1.21481	1.72804
1.15998	2.1845
	1.70338
2.03352
1.16142	0.917754
1.35555	1.40572
1.51391
0.870122	1.62917
2.12845	1.56749
2.5145	1.13826
1.10168	1.28287
0.832898	2.98872
2.30134	3.08813
0.98794	1.23754
1.42355	1.2133
2.38072	0.645316
1.70451	1.66771
1.01879	1.75963
1.66287	1.60643
2.5182	1.23998
1.2701	1.69762
2.59986	1.76376
1.47213	1.28916
1.24784	0.89127
1.00447	0.837427
1.11373	1.1979
1.70271	1.06879
1.01989
2.09453	1.78205
1.16482	0.832028
1.77525	1.26577
1.89441	1.03981
1.94934	0.85114
1.3641	1.26626
4.1052	2.36082
1.4625	1.31537
0.986105	2.84565
2.19914	1.26745
1.30662	1.10064
1.23208	1.22591
1.08083	1.43381
2.5408	0.529998
1.69468	1.2331
1.31788	1.0976
1.33147	1.09735
1.6736	1.8833
2.61743	1.18092
1.25343	1.15214
1.25189
1.29231	1.50192
3.55702	1.46639
1.23477	1.20345
2.27783	1.06321
3.84955	1.63087
1.05956	1.853
1.72695	2.68727
1.73956	1.49641
1.18957	2.87197
2.1817	1.71649
3.77371	1.61235
1.83598	3.2726
1.20503	1.6282
0.741592	0.937789
0.959087	0.763714
0.865498
0.956598	1.1768
1.86826	1.1644
1.04471	2.28072
1.03334	0.93145
1.04468	1.08322
2.17723	3.07343
1.13003	2.17695
1.13861	1.79547
1.1111	1.60892
0.859387	1.77277
1.27061	1.31702
1.34563	1.2248
1.49938	1.12237
2.20683	1.5994
0.962949	2.61791
1.46777	1.27934
0.99815	2.51229
0.945317	1.30772
1.25898	2.61722
1.95673	1.06903
1.18794	1.02147
0.866338	1.47574
1.15479	1.18184
1.57729	0.777012
1.01878	1.12996
1.00265	2.37615
1.12596	2.14987
0.900115	3.14694
1.17615	2.43306
0.996981	1.04852
1.12074	0.796372
0.880903	2.92225
1.21402	1.24898
0.957076	2.00359
1.38083	1.84549
1.026	2.84506
1.1594
1.19553	2.53936
0.993157	0.858517
0.873004	1.68476
1.36393	0.899953
1.1382	1.03646
0.849954	1.20663
0.886756	1.90013
1.11865	2.21962
0.872973	1.63964
1.56062	1.24116
2.2327	1.53134
1.48645	1.12879
0.850713	2.55163
1.74803
0.93304	1.43647
0.97921	1.04157
1.01934	0.870912
1.32868	2.05258
1.20627	1.23605
1.08774	0.677276
1.02454	2.70633
0.874668
1.10216	1.63098
1.12442	1.60845
0.898149	1.69024
1.19501	1.31408
1.03561	0.946428
1.01638	1.02224
1.17199	1.86165
1.37166	1.88272
1.02987
1.21159
3.67914	1.77287
0.927174	2.15798
2.0815	1.25013
2.11158	1.96372
0.890525
1.1037	1.79254
1.08896	0.907716
0.970901	2.18796
	2.21912
	1.43127
1.79243	2.10261
1.11289	1.15631
1.76491	1.26185
1.90394	0.945065
1.206	2.29623
2.11399	1.3465
1.26483
1.12641	2.11046
0.959595	1.00799
1.02133	0.945863
1.30753
1.70232	1.01711
1.57984	1.29854
1.9105
1.63475
2.25438	3.01903
2.794	1.15989
1.51307	0.709942
1.38809	1.15856
1.66309	2.91707
1.87505	1.72206
1.10574	2.54064
1.24683	0.900126
1.68669
1.26248	1.26756
1.11524	1.00913
1.0469	2.32994
1.55237	1.64975
1.29611	2.73512
2.97566	3.29035
	1.70376
1.53777	1.33648
1.75196	0.96902
1.36348
1.77329	1.26816
3.04866	1.44155
2.22773	1.00624
3.35488	1.43021
2.9027	3.17477
1.16066	1.92271
1.60683	1.24667
2.35664
1.48878	1.23208
1.43089	1.75237
1.35036	0.895225
1.19814	1.33672
1.66048	1.70087
1.67804	1.45592
1.32621	0.989283
1.91496	0.887345
1.9251	1.85147
0.876327	1.52822
1.77796	1.01315
2.11534	2.20379
1.58546
3.81778	0.952665
1.33822	2.30337
1.95214	1.74354
2.36341	1.0885
1.32585	1.3433
	1.4362
1.13285	1.38566
1.23134
2.387	0.765372
0.965872	0.934056
0.749048
2.2568	1.21865
2.52582	1.16139
2.83142	2.91555
1.44911	1.39401
1.3387	1.53132
1.26855	3.21206
0.917916	1.30112
3.29714	1.36899
1.80501	0.80735
2.56692	1.39095
1.67116	1.38895
4.30471	1.05444
2.32647	0.969579
1.21252
1.37554	1.18095
1.50107	1.19291
1.13871	2.43277
2.00538	1.2565
1.59298	1.24504
1.26088	1.26878
	0.801345
1.31495	1.63786
0.94044	1.31134
1.6249	1.58757
1.72665	1.02209
1.04639	1.72834
	1.38788
	1.1482
1.62693	2.05454
1.1854	2.54935
2.23029	2.80258
2.26313	1.98307
4.25328	1.18146
1.55998
2.84077	1.07554
2.24759	1.51808
3.39247	0.86792
3.47364	1.18766
	1.11381
1.41086	3.01645
1.11753	1.18026
	1.8872
	1.13488
1.72547
2.02868
2.17428
	1.09918
1.50621	1.0563
1.23772	0.950926
2.35697	1.24717
1.37871	2.65267
2.19267	1.47876
2.81477	0.887562
3.1562
1.73045	1.48524
1.31294	3.04647
	2.11307
1.59663
1.31683	1.46664
2.344	1.13865
1.35681	1.03957
1.39534	1.07009
3.30201	1.18567
1.1775	0.983642
1.47613	1.44241
4.23464
1.00365	3.22705
4.18696	1.00993
0.846344	0.928059
3.68735	1.12541
1.3305	2.13178
1.4279	1.23369
1.40037	1.06677
0.988506	0.944302
1.07489	2.30082
2.46666	1.19731
1.78085	1.72587
3.69119
1.0126	3.1189
1.37358
4.50537	0.858613
	1.20089
3.68598	1.09395
4.39542	1.25439
2.90389	1.58697
3.22177
1.74261	1.1641
	0.891664
0.777075	2.90358
1.16993	2.27318
	1.2468
0.927217	1.29649
1.04825	1.37893
	0.848263
3.47993
	1.07939
2.14678	1.01754
0.945504	0.911713
2.37012	2.1081
	1.53246
0.99432
1.90073	1.40754
3.8336
1.22161	2.28185
	0.963411
1.81801	2.06067
2.10333	1.16756
3.31358	2.69699
	1.32657
1.53399	1.96848
2.30776	1.66451
	2.07328
3.62973	1.18195
1.22188	1.19074
1.05479	2.51907
0.949159
1.74315	3.10364
	1.47101
1.30893	2.90803
0.859905	2.33133
1.15247	1.03017
1.42958	0.973837
1.55802	2.98591
	1.0691
	0.817801
2.05143	1.9688
2.26855	1.14912
3.29896	1.07829
	0.908173
1.50394	1.39965
	1.92989
1.9837	1.09103
4.27898	2.32485
1.29294	1.14611
	0.958104
	1.70505
3.20294
3.92124	2.00095
1.68112
1.04227
	1.2293
2.19181	1.1777
1.6518
1.9989
0.866755	1.24459
0.86206	0.928373
1.32229	1.49269
	2.01756
1.7845	1.19444
1.30135	1.50675
0.854674	2.0373
1.19534	2.25419
	1.77808
2.17508
0.934334
	2.325
1.37232	1.51709
1.02199
	1.30998
1.69425
	2.38189
1.02639	2.99601
2.09271	1.60514
	1.13553
4.50705	2.90051
	1.5207
1.04208	1.0118
1.83266	1.21643
1.28774
2.21498	1.43689
3.22196	1.15173
	1.29338
0.787288	0.959436
1.10641	0.918273
0.910712
2.12394	1.74918
1.45957	1.20955
2.53172	1.07921
2.47458	2.87835
2.19723	2.43903
1.53886
1.43521	1.12563
2.72452	1.25369
1.04107	1.27696
1.36523	0.938605
4.04582	2.20453
1.61412	1.24939
	2.25073
2.99265
0.94805	1.30835
4.12493	1.84327
1.11874
2.66551
1.85618
1.15069	2.90725
0.719664	1.93513
1.26811	1.34232
1.12797	1.07026
0.968288	1.46611
1.27177	2.07024
0.89959
1.47025	1.233
1.01359	1.65631
1.60964	1.11894
1.70925	1.13675
1.45039	1.41829
2.25342	1.56392
1.2464	1.30103
1.10925
1.41776	1.17242
1.0366	2.12567
	1.06616
	1.06784
1.85718	2.1525
	0.983823
2.83861	1.31437
1.13101	2.62395
1.13207	1.90194
1.02182	0.849728
0.961827	1.26724
1.76197	2.57686
1.70194	1.26144
	1.03041
1.2784	1.67506
0.802687	2.23284
2.09092	2.55211
1.2729	1.4901
	1.4431
[truncated: 2,015 more rows]

## Sheet: Figure 4-figure supplement 1C
Control	D414V
0.941232	0.794479
0.774609	0.372712
0.520667	0.595354
0.528098	0.497605
0.545155	0.754946
0.762515	0.551107
0.892067	0.486836
0.75042	0.418271
0.71447	0.829006
0.709649	0.675371
0.481146	0.479163
0.851691	0.670359
0.893455	0.722817
0.868185	0.597817
0.641134	0.887354
0.697607	0.772593
0.603487	0.850973
0.684132	0.918089
0.756307	0.633721
0.758229	0.726058
0.745185	0.657653
0.58539	0.574974
0.94003	0.909159
0.765179	0.887818
0.605204	0.257159
0.766735	0.389281
0.521972	0.420161
0.525101	0.549826
0.893124	0.700071
0.572234	0.804391
0.831042	0.462045
0.607906	0.725432
0.689807	0.620072
0.906337	0.751956
0.946511	0.341672
0.892772	0.229375
0.897496	0.658699
0.909108	0.558764
0.920813	0.588761
0.928389	0.306537
0.735026	0.549857
0.890438	0.377547
0.836364	0.738264
0.7293	0.434415
0.751033	0.607075
0.73162	0.581572
0.844894	0.502314
0.90368	0.420155
0.763464	0.687579
0.926909	0.637789
0.299153	0.759547
0.540816	0.688252
0.792497	0.459604
0.550853	0.529475
0.664128	0.376022
0.7575	0.553163
0.829037	0.417242
0.867501	0.586543
0.904319	0.795723
0.578456	0.529301
0.796345	0.557247
0.487552	0.370146
0.777799	0.733894
0.909342	0.386589
0.694924	0.573469
0.887996	0.597925
0.466932	0.78256
0.932954	0.548628
0.629515	0.41572
0.584551	0.672192
0.844733	0.706979
0.870975	0.731832
0.931135	0.701132
0.898444	0.374564
0.880379
0.482777	0.886952
0.725273	0.483281
0.607317	0.547003
0.704594	0.647392
0.907037	0.809281
0.605806	0.767651
0.757566	0.943938
0.707435	0.915928
0.608355	0.704059
0.809502	0.866865
0.811131	0.316043
0.606562	0.767313
0.598536	0.866725
0.790835	0.522667
0.741234	0.857278
0.772464	0.924389
0.701573	0.782649
0.879228	0.489918
0.848335	0.454715
0.886048	0.908215
0.842507	0.693402
0.592336	0.675969
0.556043	0.676125
0.934222	0.831505
0.890603	0.932006
0.657164	0.5318
0.683674	0.668625
0.923838	0.60124
0.928438	0.895679
0.844896	0.537999
0.936867	0.916525
0.549281	0.713055
0.822748	0.547889
0.934337	0.69133
0.825424	0.464346
0.930182	0.804368
0.467079	0.772094
0.898045	0.612956
0.921002	0.934527
0.755489	0.455461
0.391974	0.592656
0.777166	0.692465
0.746215	0.842893
0.642045	0.891027
0.678553	0.765475
0.30332	0.89045
0.919299	0.854527
0.576856	0.929396
0.901654	0.870121
0.91331	0.752784
0.793794	0.894729
0.571434	0.71019
0.574136	0.845555
0.910327	0.870202
0.919609	0.86284
0.753676	0.701935
0.910261	0.847838
0.950522	0.690858
0.792407	0.925086
0.142891	0.678453
0.451805	0.832584
0.839214	0.697717
0.883991	0.83721
0.886039	0.793485
0.91188	0.639784
0.94254	0.887606
0.94195	0.782603
0.758637	0.687135
0.613393	0.739518
0.688197	0.905507
0.525934	0.825093
0.741082	0.929164
0.790159	0.801657
0.814015	0.731141
0.915075	0.68845
0.659963	0.763278
0.68344	0.7177
0.917738	0.689719
0.33165	0.926636
0.842917	0.80277
0.747876	0.541284
0.643549	0.634965
0.836919	0.869244
0.650412	0.845852
0.940938	0.498706
0.941333	0.712342
0.662087	0.790327
0.789531	0.875225
0.679304	0.872265
0.724116	0.436591
0.871531	0.717093
0.927285	0.757704
0.232391	0.711935
0.696466	0.462868
0.687778	0.761044
0.941851	0.59243
0.490475	0.480045
0.432756	0.45645
0.951108	0.478467
0.587717	0.580887
0.624607	0.378827
0.2886	0.472569
0.568476	0.316497
0.331973	0.431636
0.927107	0.282951
0.868913	0.449364
0.743186
0.566325	0.703444
0.858907	0.710122
0.851102	0.687865
0.46919	0.585743
0.943803	0.896568
0.883317	0.746652
0.843869	0.790379
0.459454	0.760517
0.542021	0.621822
0.851761	0.751611
0.396749	0.904004
0.491111	0.718287
0.738347	0.641631
0.748371	0.764362
0.657044	0.849869
0.325959	0.774735
0.760582	0.817664
0.522676	0.877613
0.782279	0.903044
0.613264	0.851441
0.878433	0.628838
0.532237	0.5353
0.882061	0.566071
0.70342	0.901123
0.812447	0.868064
0.648782	0.730343
0.640969	0.647241
0.645095	0.893916
0.685985	0.560283
0.772211	0.649768
0.675769	0.816149
	0.884385
0.589295	0.775592
0.413641	0.625768
0.59786	0.895696
0.778921	0.633004
0.577584	0.87259
0.465617	0.881501
0.844498	0.855618
0.662959	0.877725
0.59605	0.794804
0.644831	0.707288
0.425304	0.943089
0.575731	0.71141
0.589353	0.824684
0.508393	0.930662
0.381622	0.753163
0.623185	0.82353
0.688785	0.74304
0.291189	0.724619
0.503828	0.758111
0.658718	0.773419
0.802216	0.821757
0.800373	0.846126
0.737369	0.766557
0.421086	0.71306
0.616539	0.577755
0.847681	0.520313
0.732612	0.74323
0.682236	0.897079
0.66052	0.71896
0.404182	0.758397
0.340111	0.88743
0.682485	0.607281
0.655585	0.835442
0.544617	0.712964
0.488897	0.677259
0.675415	0.568917
0.46103	0.59863
0.645114	0.597978
0.506709	0.882095
0.614377	0.699477
0.194604	0.800393
0.425531	0.589776
0.489996	0.754726
0.476593	0.861862
0.598597	0.751816
0.737332	0.519865
0.35208	0.89158
0.578476	0.757212
0.587395	0.691411
0.625192	0.688201
0.830464	0.895764
0.853665	0.613286
0.558775	0.537106
0.112793	0.674825
0.564628	0.810109
0.619044	0.451717
0.768277	0.761724
0.667082	0.811192
0.212372	0.829097
0.682422	0.800764
0.786024	0.842875
0.399529	0.630098
0.374949	0.816802
0.725793	0.55356
0.731465	0.718606
0.4507	0.584603
0.659976	0.596218
	0.673942
0.109271	0.617242
0.752881	0.787536
0.655593	0.845412
0.528972	0.891725
0.513878	0.833574
0.300921	0.866166
0.581077	0.661156
0.475666	0.612215
0.454043	0.895874
0.520354	0.706608
0.441747	0.328787
0.339214	0.409987
0.607852	0.691651
0.824447	0.72971
0.348339	0.797876
0.28084	0.790763
0.839916	0.690801
0.721808	0.627133
0.504894	0.510228
0.495309	0.835179
0.641345	0.880257
0.801133	0.395113
0.634032	0.838495
0.78761	0.779054
0.658935	0.539474
0.424765	0.891642
0.639325	0.842584
0.680828	0.595941
0.789691	0.879694
0.348939	0.761973
0.697154	0.907023
0.769633	0.8689
0.704475	0.914029
0.618716	0.515441
0.744062	0.605162
0.626748	0.424432
0.457376	0.778952
0.831517	0.646672
0.642305	0.8177
0.578569	0.918773
0.852618	0.64108
0.61153	0.763903
0.855299	0.870084
0.662637	0.30367
0.586716	0.325643
0.715133
0.6442	0.921592
0.774899	0.592813
0.842774	0.817317
0.497693	0.956473
0.7349	0.874214
0.539545	0.861076
0.677954	0.61502
0.66274	0.62798
0.559028	0.576047
0.46768	0.583479
0.525511	0.873007
0.581557	0.687197
0.585664	0.659869
0.585635	0.759487
0.578892	0.451156
0.381093	0.677348
0.844397	0.737186
0.709527	0.878315
0.384419	0.702892
0.500594	0.755348
0.829153	0.784469
0.898549	0.54439
0.530921	0.749343
	0.908652
0.0927392	0.84783
0.677911	0.597116
0.770139	0.59102
0.361081	0.500782
0.649146	0.875577
0.726799	0.463199
0.556959	0.905818
0.796689	0.611062
0.69504	0.641458
0.54783	0.793679
0.681711	0.636833
0.598846	0.5643
0.540277	0.834419
0.636084	0.815406
0.640919	0.567901
0.632898	0.622466
0.477463	0.887235
0.428986	0.850114
0.576403	0.858187
0.613106	0.860795
0.612139	0.877272
0.687066	0.565395
0.67729	0.65064
0.60285	0.940486
0.55475	0.911379
0.720861	0.858293
0.834601	0.875041
0.832366	0.740104
0.620799	0.417482
0.704469	0.547632
0.446825	0.500462
0.328969	0.869502
0.489398	0.752713
0.500968	0.791521
0.61549	0.866063
0.607286	0.708358
0.395177	0.872793
0.620151	0.510629
0.419307	0.853664
0.564753	0.889178
0.71906	0.508753
0.633012	0.773759
0.426724	0.886662
0.750962	0.688148
0.761151	0.646135
0.736063	0.752209
0.669851	0.875947
0.739787	0.902807
0.6592	0.781252
0.614965	0.49554
0.708622	0.697751
0.648062	0.762566
0.824228	0.832717
0.754292	0.699568
0.606291	0.613289
0.729953	0.831001
0.36676	0.886509
0.680699	0.85056
0.717294	0.88522
0.646615	0.893671
0.833836	0.750611
0.340315	0.612986
0.800186	0.920543
0.853673	0.720331
0.668454	0.75964
0.810428	0.846675
0.892268	0.909837
0.652907	0.697421
0.463986	0.854705
0.533823	0.710815
0.793248	0.784619
0.804498	0.524706
0.7994	0.700561
0.815005	0.774436
0.630654	0.90659
0.698456	0.576325
0.593098	0.488473
0.745061	0.66998
0.483172	0.828697
0.577379	0.51829
0.765411	0.876508
0.796061	0.788258
0.822299	0.536895
0.840164	0.68282
0.571458	0.715106
0.790242	0.803048
0.792365	0.558141
0.421107	0.860162
0.815055	0.892401
0.836513	0.565358
0.50383	0.520444
0.541169	0.624852
0.54884	0.909813
	0.875436
0.65138	0.778348
0.59055	0.808534
0.59371	0.723634
0.634012	0.598456
0.646795	0.625355
0.479089	0.521259
0.482672	0.702321
0.637617	0.771995
0.725435	0.816273
0.525374	0.635839
0.372763	0.648234
0.559452	0.710412
0.597606	0.830367
0.763947	0.726369
0.793435	0.911507
0.806392	0.915856
0.858883	0.844031
0.590862	0.757012
0.812917	0.772706
0.65152	0.655669
0.854176	0.588728
0.48253	0.701255
0.585961	0.856624
0.580168	0.85302
0.641976	0.799037
0.780377	0.621788
0.656681	0.871575
0.726746	0.860757
0.541159	0.495853
0.812564	0.67296
0.484876	0.872003
0.719073	0.835864
0.69277	0.396161
0.530893	0.836107
0.786245	0.863351
0.652599	0.606677
0.683715	0.849316
0.597721	0.787107
0.713387	0.569102
0.764887	0.810516
0.609307	0.624033
0.46633	0.810861
0.405771	0.187768
0.668141	0.585204
0.899829	0.835444
0.756775	0.923359
0.866791	0.743833
0.630372	0.873258
0.595899	0.871134
0.534164	0.825825
0.714514	0.736733
0.438614	0.781066
0.597627	0.706515
0.320096	0.736301
0.852928	0.729396
0.53475	0.887508
0.576338	0.811917
0.838134	0.801632
0.795649	0.744616
0.447451	0.882493
0.833112	0.777008
0.604643	0.698221
0.841433	0.770944
0.54874	0.773514
0.316161	0.562377
0.511252	0.710321
0.843009	0.854069
0.802226	0.877681
0.568306	0.630748
0.718374	0.91722
0.862119	0.677115
0.771626	0.779263
0.601501	0.80895
0.548165	0.884038
0.695486	0.553103
0.543032	0.575401
0.643887	0.886679
0.748845	0.756554
0.641861	0.684712
0.592098	0.810214
0.577108	0.574046
0.752958	0.735665
0.796893	0.598805
0.383733	0.811014
0.433746	0.77975
0.8233	0.661003
0.61678	0.741978
0.586217	0.53467
0.367699	0.809103
0.783966	0.826557
0.514251	0.642993
0.471944	0.838535
0.60418	0.804827
0.774353	0.815602
0.778433	0.765112
0.575555	0.739094
0.687151	0.887266
0.555304	0.643586
0.856012	0.727332
0.421017	0.810754
0.579647	0.862537
0.564719	0.536014
0.414592	0.868592
0.733201	0.677571
0.527968	0.605738
0.332002	0.634002
0.670188	0.528509
0.824546	0.749821
0.703946	0.690544
0.596843	0.705886
0.45531	0.503904
0.680826	0.820332
0.367261	0.444786
0.390015	0.724097
0.708032	0.834008
0.777012	0.782015
0.580213	0.800144
0.701704	0.502336
0.55614	0.845169
0.71334	0.45021
0.685429	0.777019
0.506576	0.800498
0.44581	0.687245
0.836259	0.620703
0.206933	0.878928
0.698325	0.891791
0.642562	0.86345
0.566132	0.686395
0.63245	0.374654
0.430739	0.71224
0.854316	0.421662
0.706912	0.386336
0.930056	0.448035
0.13073	0.652309
0.638055	0.774272
0.822033	0.448251
0.795711	0.904873
0.66614	0.570245
0.865474	0.616415
0.672612	0.415209
0.591112	0.687366
0.70718	0.749017
0.817533	0.752209
0.647687	0.773158
0.873419	0.489825
0.757867	0.707887
0.567402	0.881711
0.638244	0.733548
0.834197	0.506702
0.658286	0.899272
0.565948	0.738929
0.718449	0.691694
0.508019	0.546043
0.67714	0.673616
0.837048	0.574974
0.821827	0.856354
0.80239	0.61392
0.683727	0.595079
0.79329	0.560094
0.639419	0.776705
0.75245	0.80431
0.646829	0.447484
0.63553	0.860871
0.636304	0.721685
0.689959	0.885613
0.488585	0.498444
0.578687	0.740288
0.755466	0.762123
0.6189	0.740883
0.827209	0.704007
0.808115	0.66037
0.805656	0.565113
0.5838	0.305618
0.693031	0.7316
0.725026	0.630365
0.71052	0.556178
0.623391	0.657117
0.579278	0.613538
0.60805	0.862115
0.84191	0.643054
0.688083	0.51866
0.527104	0.60982
0.777531	0.638536
0.522101	0.489809
0.528356	0.662838
0.714603	0.540833
0.589308	0.636656
0.562975	0.505265
0.783982	0.825803
0.661684	0.627492
0.430909	0.766437
0.649621	0.60475
0.812474	0.804063
0.887023	0.574108
0.816678	0.893541
0.855	0.597865
0.812797	0.694744
0.691605	0.869466
0.772621	0.721984
0.737075	0.670905
0.743757	0.725515
0.540264	0.528712
0.77958	0.539143
0.675073	0.67879
0.776677	0.790972
0.775382	0.909915
0.667457	0.83502
0.677798	0.810384
0.659639	0.73676
0.578804	0.697391
0.820327	0.767622
0.721782	0.50141
0.866397	0.686022
0.861534	0.781863
0.715198	0.850702
0.551759	0.808773
0.72868	0.773927
0.780529	0.748416
0.824236	0.559118
0.635257	0.683471
0.814684	0.553475
0.881935	0.88777
0.785309	0.920189
0.855092	0.520236
0.778046	0.772926
0.801798	0.870271
0.771849	0.864548
0.886928	0.455492
0.799009	0.762716
0.880668	0.621743
0.702506	0.793792
0.745171	0.780493
0.753801	0.837904
0.738695	0.832268
0.903603	0.586469
0.839926	0.743945
0.700037	0.768798
0.717275	0.626812
0.779319	0.826632
0.884021	0.789123
0.779289	0.782787
0.880287	0.812383
0.589932	0.692503
0.638003	0.689234
0.670142	0.690582
0.825525	0.829807
0.600113	0.732729
0.855761	0.8238
0.882923	0.643584
0.875736	0.871769
0.670843	0.878802
0.707727	0.376249
0.755442	0.890247
0.809634	0.863488
0.872929	0.634478
0.873868	0.630668
0.814421	0.601191
0.839514	0.774916
0.726837	0.552893
0.774543	0.561229
0.869632	0.627586
0.670479	0.786345
0.592284	0.801273
0.853043	0.89935
0.700584	0.70858
0.529526	0.663986
0.87275	0.412493
0.619566	0.696537
0.587615	0.582697
0.781316	0.607739
0.783163	0.519393
0.716619	0.842269
0.771423	0.509704
	0.876754
0.0883903	0.77363
0.743896	0.719052
0.757418	0.779003
0.331929	0.792037
0.685069	0.483743
0.7036	0.447646
0.697546	0.817687
0.708631	0.749477
0.558221	0.328537
0.666937	0.659387
0.547709	0.649055
0.588977	0.273369
0.594553	0.630998
0.624239	0.834191
0.406818	0.85902
0.596574	0.734927
0.664009	0.790236
0.484406	0.53817
0.648873	0.718926
0.736185	0.568026
0.568799	0.676875
0.398926	0.721199
0.627589	0.558285
0.644048	0.663288
0.614551	0.73004
0.869529	0.717158
0.691454	0.467455
0.493063	0.853478
0.861106	0.528063
0.679522	0.58217
0.541882	0.74736
0.818167	0.374176
0.573497	0.767238
0.385779	0.592015
0.606623	0.681222
0.644057	0.706734
0.914274	0.864062
0.603875	0.617815
0.732283	0.743605
0.421007	0.848431
0.532444	0.782102
0.747123	0.800906
0.604184	0.492888
0.733352	0.581896
0.364091	0.872711
0.725431	0.769034
0.76962	0.612456
0.71205	0.718171
0.49903	0.661087
0.504526	0.711653
0.485932	0.719962
0.52618	0.822089
0.762896	0.667128
0.69104	0.445004
0.775773	0.539136
0.584962	0.35556
0.470618	0.60658
0.578018	0.806808
0.303285	0.778867
0.517707	0.664448
0.605519	0.487576
0.914535	0.580219
0.490173	0.474953
0.772718	0.629343
0.694492	0.540383
0.843601	0.562948
0.724011	0.884898
0.677107	0.532637
0.676634	0.464309
0.583979	0.596284
0.230563	0.672503
0.596828	0.778538
0.550989	0.675584
0.678665	0.741109
0.539857	0.814445
0.189757	0.796563
0.479637	0.844098
0.49285	0.587551
0.733779	0.571563
0.569433	0.799099
0.861385	0.549353
0.273617	0.396538
0.689871	0.848214
0.83444	0.765845
0.714999	0.667959
0.552572	0.453592
0.424901	0.629602
0.232258	0.423531
0.825482	0.458263
0.352035	0.505052
0.495246	0.629101
	0.530961
0.721342	0.573566
0.252842	0.699877
0.759427	0.631404
0.776429	0.656359
0.576251	0.727152
0.616192	0.837066
0.557157	0.514069
0.649529	0.301553
0.6911	0.591772
0.629589	0.653
0.855643	0.829728
0.590976	0.470915
0.556728	0.496104
0.61484	0.483946
0.601276	0.803254
0.32217	0.694717
0.814616	0.761186
0.421706	0.760231
0.625952	0.451814
0.134784	0.852699
0.52902	0.583484
0.815772	0.280938
0.594133	0.640026
0.676641	0.665168
0.663617	0.785078
0.67109	0.87481
0.895601	0.636717
0.738606	0.234877
0.793884	0.429832
0.646022	0.663809
0.677503	0.648357
0.862401	0.548687
0.634703	0.836814
0.842763	0.671385
0.88543	0.5302
0.795294	0.839593
0.780377	0.810032
0.628247	0.34354
0.878588	0.857182
0.505738	0.640116
0.719193	0.584071
0.702586	0.692901
0.402657	0.796295
0.792311	0.475264
0.783814	0.555274
0.609661	0.626384
0.776756	0.321145
0.583057	0.730766
0.810364	0.516413
0.521776	0.732399
0.62269	0.7084
0.712462	0.772765
0.653651	0.729041
0.669086	0.8699
0.736253	0.593846
0.637568	0.580766
0.764199	0.814165
0.672649	0.78406
0.827854	0.451662
0.577399	0.697492
0.839018	0.724894
0.674229	0.693389
0.803626	0.416233
0.673253	0.442531
0.633408	0.483598
0.836446	0.527122
0.497035	0.801182
0.785618	0.475554
0.613461	0.66535
0.345602	0.472776
0.836513	0.495394
0.598479	0.79721
0.821399	0.687067
0.546982	0.570987
0.711458	0.69531
0.500457	0.652598
0.473112	0.417407
0.8334	0.769437
0.231679	0.573195
0.400458	0.428886
0.730596	0.528608
0.722865	0.531571
0.680132	0.6285
0.446833	0.621817
0.910459	0.468333
0.743962	0.645598
0.725699	0.788948
0.605899	0.557969
0.636139	0.737715
0.632079	0.548664
0.692182	0.701275
0.730891	0.691811
0.695014	0.704502
0.0938465	0.811386
0.81518	0.590443
0.642225	0.45327
0.846792	0.688234
0.822586	0.571576
0.510825	0.67992
0.707134	0.581475
	0.540335
0.627247	0.824674
0.629927	0.636322
0.687861	0.820707
0.775597	0.654596
0.562558	0.856795
0.650979	0.795508
0.589377	0.797396
0.563084	0.459482
0.7308	0.693469
0.54302	0.731643
0.549531	0.655991
0.570587	0.22656
0.49615	0.702336
0.771849	0.786964
0.505064	0.675647
0.584467	0.710809
0.449612	0.678627
0.616151	0.316755
0.660573	0.639795
0.560167	0.427131
0.620881	0.420841
0.650144	0.830817
0.571136	0.843368
0.381083	0.520626
0.635265	0.4997
0.402584	0.544339
0.601036	0.568135
0.675057	0.824733
0.627059	0.552918
0.633158	0.578816
0.392082	0.815758
0.731563	0.474586
0.90086	0.787989
0.381692	0.751034
0.654794	0.59838
0.753651	0.849949
0.851833	0.385878
0.6052	0.820625
0.366706	0.461342
0.857159	0.788476
0.578544	0.835106
0.602445	0.751885
0.534451	0.222622
0.544711	0.733651
0.848044	0.448826
0.563827	0.785291
0.689906	0.663524
0.757263	0.615913
0.819307	0.549637
0.411788	0.500549
0.69327	0.476556
0.518758	0.527345
0.712089	0.746457
0.597241	0.330867
0.787075	0.602297
0.379736	0.588467
0.546433	0.720252
0.706384	0.773636
0.411464	0.431205
0.698836	0.773948
0.388779	0.69893
0.613546	0.833805
0.632379	0.335889
0.342784
0.821574	0.854986
0.592817	0.832976
0.554031	0.859102
0.814198	0.675892
0.641456	0.70807
0.789909	0.858058
0.5551	0.882251
0.557677	0.761663
0.51782	0.89811
0.681227	0.856194
0.471796	0.859851
0.203307	0.793042
0.412552	0.845999
0.561699	0.763471
0.461074	0.731007
0.486591	0.868577
0.420056	0.857117
0.603215	0.782113
0.594533	0.754135
0.877962	0.840618
0.533983	0.718329
0.410449	0.758671
0.828176	0.60886
0.73832	0.850504
0.462865	0.692724
0.402923	0.772436
0.523877	0.632613
0.749789	0.619801
0.26789	0.845512
0.820404	0.864693
0.561128	0.769426
0.684618	0.847581
0.604387	0.813083
0.550461	0.623768
0.769509	0.73663
0.544652	0.880621
0.656283	0.698427
0.750406	0.882733
0.639371	0.358434
0.56817	0.860793
0.589146	0.613683
0.167716	0.856167
0.794102	0.893806
0.559061	0.894757
0.372244	0.842382
0.533469	0.891146
0.538564	0.757882
0.624564	0.883048
0.458447	0.693796
0.453044	0.81141
0.711668	0.787375
0.50346	0.804444
0.296194	0.417741
0.469789	0.682025
0.904275	0.814024
0.56251	0.670796
0.398392	0.718293
0.688076	0.690215
0.675296	0.844366
0.520239	0.622554
0.57843	0.427322
0.895195	0.542332
0.836132	0.549482
0.858105	0.84759
0.699036	0.782601
0.326955	0.814156
0.685058	0.800528
0.52369	0.868921
0.621107	0.489058
0.780616	0.632889
0.547585	0.906981
0.79071	0.912718
0.692367	0.86124
0.41426	0.668269
0.703572	0.612347
0.73828	0.866773
0.652971	0.814414
0.679067	0.572237
0.598625	0.841222
0.81019	0.803145
0.90685	0.852165
0.28083	0.636826
0.866463	0.912703
0.678783	0.801846
0.774779	0.891469
0.545647	0.871753
0.556589	0.880649
0.654689	0.57083
0.595994	0.881083
0.600297	0.870474
0.662579	0.852677
0.423683	0.846664
0.118904	0.737242
0.426328	0.69704
0.459998	0.586172
0.6772	0.559239
0.348499	0.834491
0.714261	0.870422
0.582292	0.806309
0.582697	0.663642
0.628292	0.457282
0.562173	0.855698
0.543705	0.921285
0.529594	0.870464
0.632095	0.81256
0.56964	0.785999
0.757231	0.846179
0.775286	0.845862
0.840136	0.832264
0.613706	0.693514
0.715976	0.898313
0.474271	0.864407
0.632858	0.818222
0.550594	0.837359
0.783584	0.808203
0.855301	0.780682
0.535381	0.560521
0.677317	0.875842
0.314589	0.668597
0.607914	0.581471
0.609608	0.869058
0.367894	0.843234
0.582192	0.559827
0.470104	0.743585
0.70111	0.823746
0.68987	0.875622
0.732261	0.86651
0.538634	0.604848
0.642092	0.705755
0.681616	0.594569
0.489452	0.826031
	0.861982
0.83804	0.733299
0.696092	0.877057
0.797857	0.447529
0.756847	0.900743
0.589321	0.706625
0.698754	0.897673
0.673354	0.752669
0.738339	0.864653
0.898443	0.413187
0.553151	0.845005
0.649435	0.686135
0.769568	0.775793
0.905446	0.627973
0.754136	0.911398
0.862442	0.588262
0.647549	0.793761
0.562908	0.87063
0.799027	0.350281
0.702179	0.894111
0.493437	0.864479
0.75919	0.846834
0.849532	0.599782
0.791574	0.912149
0.495065	0.85206
0.77998	0.880409
0.758131	0.247809
0.573369	0.920293
0.784985	0.742723
0.878289	0.595228
0.891462	0.883974
0.829847	0.438335
0.797239	0.3379
0.812571	0.335799
0.541408	0.493933
0.819531	0.502833
0.849817	0.226765
0.928371
0.408371	0.0618091
0.783751	0.366707
0.734503	0.690249
0.726117	0.579251
0.836022	0.581286
0.923917	0.580241
0.432906	0.472223
0.488143	0.593292
0.467209	0.461282
0.503538	0.300256
0.753536	0.588453
0.554624	0.540523
0.536147	0.718902
0.656893	0.633836
0.483085	0.443666
0.746212	0.433566
0.535371	0.727801
0.42051	0.514851
0.13738	0.717311
0.811471	0.615148
0.735702	0.714235
0.467015	0.472867
0.642937	0.646334
0.598126	0.651655
0.491773	0.686348
0.370678	0.791157
0.71068	0.40313
0.654042	0.815095
0.553387	0.469227
0.503889	0.299327
0.570394	0.699422
0.764556	0.586558
0.697105	0.710703
0.506128	0.526601
0.668324	0.550965
0.21054	0.4947
0.770981	0.64909
0.564608	0.587501
0.511543	0.552755
0.415771	0.531268
0.707652	0.306555
0.860395	0.488762
0.859373	0.602831
	0.795407
0.614222	0.61112
0.508392	0.627487
0.460099	0.60258
0.45099	0.5779
0.582039	0.652529
0.573132	0.707771
0.49621	0.687493
0.505174	0.446081
0.58	0.512037
0.460615	0.537925
0.495976	0.434065
0.447062	0.72747
0.522555	0.586316
0.563642	0.4483
0.879528	0.596473
0.532052	0.796802
0.556526	0.575678
0.558213	0.578546
0.592524	0.666665
0.644551	0.368549
0.465496	0.56827
0.349308	0.595978
0.322555	0.695203
0.570707	0.681257
0.513243	0.63062
0.437275	0.531641
0.52297	0.383785
0.447857	0.556547
0.488202	0.4623
0.749592	0.479865
0.633622	0.599386
0.357957	0.669634
0.507685	0.613716
0.436395	0.710453
0.598199	0.353321
0.432337	0.355929
0.697828	0.716807
0.494436	0.390569
0.599356	0.601342
0.449654	0.500047
0.693093	0.685129
0.572233	0.572755
0.319476	0.55113
0.713778	0.561609
0.458887	0.479651
0.432714	0.640002
0.777163	0.702879
0.390897	0.457103
0.44887	0.697501
0.396942	0.689392
0.467704	0.569608
0.457443	0.599909
0.457298	0.481846
0.479527	0.400082
0.379252	0.570981
0.495988	0.589704
0.454384	0.433887
0.456016	0.573147
0.75787	0.620838
0.460084	0.385179
0.376585	0.790994
0.773621	0.707973
0.569166	0.580138
0.507499	0.58683
0.683284	0.418718
0.426559	0.389929
0.646594	0.819627
0.812326	0.680727
0.510549	0.490905
0.679029	0.624806
0.340011	0.614959
0.565763	0.392283
0.379617	0.803932
0.851973	0.639454
0.705518	0.202923
0.500184	0.614634
0.520089	0.374277
0.596074	0.432035
0.5725	0.592466
0.478197	0.382046
0.504236	0.198356
0.757701	0.803216
0.158125	0.334367
0.706839	0.499109
0.411145	0.491522
0.445063	0.625951
0.680157	0.680478
0.503552	0.285484
0.624901	0.459136
0.457081	0.739629
0.612207	0.243215
0.392831	0.537263
0.456093	0.462752
0.603038	0.380232
0.742029	0.5035
0.593053	0.470329
0.49348	0.434179
0.603012	0.757815
0.449063	0.69593
0.330898	0.462594
0.617937	0.480857
0.528368	0.60273
0.900457	0.256195
0.575294	0.605947
0.811911	0.741897
0.552128	0.707768
0.691656	0.37773
0.676301	0.52189
0.876623	0.375713
0.471439	0.606512
0.604672	0.498519
0.84686	0.43718
0.382159	0.105924
0.707836	0.512771
0.585134	0.488391
0.490162	0.368988
0.746264	0.416417
0.759489	0.573296
0.396731	0.576062
0.667352	0.782866
0.464879	0.502097
0.391979	0.655228
0.660202	0.579756
0.848299	0.181916
0.497643	0.349361
0.56958	0.560007
0.727359	0.473848
0.471722	0.602259
0.725177	0.553968
0.536093	0.2047
0.519322	0.849313
0.81514	0.567767
0.664183	0.3743
0.866788	0.826477
0.83239	0.483579
0.683844	0.627406
0.472082	0.885269
0.7059	0.273494
0.802884	0.875238
0.784566	0.759157
0.57775	0.839122
0.376062	0.780411
0.478585	0.636898
0.577328	0.870158
0.653277	0.318634
0.593779	0.781081
0.796327	0.771364
0.425024	0.620835
0.742852	0.510309
0.828711	0.767214
0.559126	0.472028
0.832284	0.793642
0.691099	0.676302
0.639793	0.528877
0.343151	0.774835
0.722276	0.770045
0.542528	0.505704
0.486419	0.913481
0.709447	0.762631
0.539079	0.921747
0.477564	0.466417
0.436651	0.742617
0.649418	0.925579
0.572085	0.573418
0.566332	0.665516
0.439391	0.305963
0.526992	0.923928
0.749326	0.907609
0.905828	0.899301
0.433912	0.423759
0.878043	0.377756
0.784955	0.677553
0.493938	0.482397
0.7425	0.59853
0.448176	0.708933
0.636459	0.700852
0.630306	0.92455
0.72701	0.821767
0.858057	0.680794
0.503239	0.656961
0.827884	0.518478
0.687496	0.342242
0.414544	0.360638
0.543149	0.903228
0.333627	0.557891
0.723106	0.393984
0.595399	0.420669
0.568061	0.594178
0.475332	0.813849
0.517533	0.729308
0.127445	0.525933
0.456419	0.450244
0.633929	0.689215
0.511158	0.427997
0.50085	0.261077
	0.854008
0.78196	0.901373
0.537118	0.640102
0.622151	0.757632
0.589583	0.326024
0.814168	0.374311
0.884196	0.650897
0.627982	0.585226
0.704761	0.417483
0.775482	0.566659
0.547956	0.805099
0.724772	0.740446
0.67952	0.261444
0.571281	0.428024
0.779732	0.412544
0.71876	0.546727
0.856337	0.908347
0.705347	0.781749
0.536914	0.737747
0.708881	0.29943
0.858221	0.300818
0.684049	0.464125
0.904511	0.625461
0.556474	0.732451
0.508476	0.436463
0.566996	0.660241
0.869105	0.571979
0.727444	0.434431
0.79769	0.39448
0.756783	0.824863
0.794429	0.467456
0.507223	0.548376
0.849053	0.408843
0.642878	0.429461
0.835511	0.706404
0.779306	0.905741
0.450637	0.816421
0.486266	0.300518
0.426969	0.515187
0.757361	0.832382
0.708131	0.886974
0.820107	0.377472
0.546957	0.293121
0.678545	0.286092
0.882466	0.680671
0.809658	0.335384
0.828083	0.460043
0.7364	0.721312
0.641361	0.52718
0.62963	0.310756
0.678836	0.769233
0.662947	0.602754
0.630243	0.395956
0.76121	0.261606
0.524707	0.759645
0.70336	0.714378
0.896562	0.791454
0.348443	0.319997
0.847105	0.725535
0.568649	0.363705
0.768006	0.230632
0.655061	0.655128
0.887054	0.576033
0.614359	0.462793
0.798552	0.634528
0.701368	0.829471
0.801514	0.86619
0.84582	0.740594
0.506666	0.651045
0.339603	0.255487
0.842578	0.509547
0.380138	0.356047
0.631291	0.470905
0.737559	0.374973
0.823001	0.434598
0.822267	0.348001
0.901093	0.271321
0.427053	0.363898
0.507989	0.536135
0.859401	0.88484
0.911175	0.414491
0.509887	0.34964
0.856777	0.792343
0.499347	0.768248
0.880599	0.805108
0.75117	0.425231
0.652564	0.500712
0.607711	0.771101
0.906495	0.375911
0.587085	0.362347
0.622939	0.234544
0.834706	0.897848
0.830906	0.58748
0.784538	0.372606
0.876613	0.820262
0.710017	0.83602
0.585384	0.861417
0.743687	0.693993
0.583408	0.455934
0.597	0.184574
0.773895	0.333409
0.777778	0.26964
0.366822	0.732911
0.642317	0.386597
0.672442	0.249437
0.499908	0.502888
0.566919	0.259556
0.546245	0.858531
0.6069	0.473404
0.8172	0.565784
0.440072	0.901897
0.910992	0.367586
0.758325	0.655504
0.129925	0.467925
0.492379	0.890312
0.565192	0.456457
0.636463	0.835112
0.339242	0.215124
0.752679	0.281999
0.870576	0.910269
0.799104	0.545191
0.38667	0.675478
0.548416	0.564388
0.537292	0.465705
0.785535	0.877937
0.90535	0.447084
0.570895	0.806168
0.753788	0.254493
0.357113	0.819276
0.441321	0.48321
0.513155	0.504107
0.815758	0.324007
0.74698	0.611452
0.455588	0.370373
0.847176	0.294488
0.836074	0.358252
0.573791	0.214765
0.684457	0.809735
0.613077	0.265853
0.887138	0.587074
0.778234	0.709792
0.795052	0.315428
0.670179	0.489071
0.708973	0.64456
0.841679	0.861449
0.644062	0.600497
0.820943	0.38275
0.806698	0.580523
0.894642	0.286775
0.867604	0.450784
0.81526	0.49186
0.658752	0.466814
0.899651	0.325477
0.640371	0.353588
0.154014	0.341868
0.519148	0.549564
0.495807	0.542353
0.718758	0.509119
0.827381	0.362419
0.892991	0.494938
0.529927	0.498969
0.502161	0.390285
0.747712	0.790338
0.887575	0.47633
0.643281	0.352513
0.904798	0.34312
0.915694	0.651066
0.647955	0.900187
0.64816	0.823457
0.697338	0.569804
0.82139	0.272567
0.847202	0.463475
0.867044	0.385193
0.504252	0.308295
0.630779	0.360907
0.355434	0.278937
0.559908	0.414864
0.661683	0.374679
0.59166	0.794164
0.625305	0.221731
0.694623	0.222186
0.569678	0.890962
0.565421	0.324264
0.845109	0.316814
	0.434674
0.835335	0.621038
0.65321	0.530083
0.690715	0.447553
0.478542	0.260488
0.840292	0.363756
0.619657	0.641112
0.764006	0.412924
0.502121	0.543248
0.864627	0.385704
0.893241	0.348375
0.921282	0.264165
0.667884	0.440344
0.645151	0.794287
0.893341	0.537801
0.495471	0.232044
0.566524	0.296707
0.623402	0.435085
0.783791	0.291878
0.888507	0.389812
0.704182	0.252467
0.610745	0.300861
0.796469	0.538741
0.614788	0.560199
0.710997	0.783166
0.623535	0.350251
0.593461	0.322886
0.671846	0.322223
0.773426	0.518492
0.484104	0.367083
0.659965	0.47572
0.674805	0.602218
0.929842	0.774229
0.880576	0.677328
0.528038	0.299389
0.542105	0.691957
0.688271	0.236603
0.545078	0.442506
0.911893	0.612651
0.920472	0.589217
0.85916	0.696164
0.365433	0.612821
0.679592	0.357919
0.75596	0.336894
0.765321	0.54969
0.680276	0.390907
0.684346	0.25384
0.895854	0.28772
0.926001	0.463301
0.638275	0.350307
0.950865	0.85528
0.736874	0.585794
0.800517	0.423801
0.638458	0.337284
0.821781	0.341177
0.800998	0.543643
0.869125	0.405429
0.579709	0.175155
0.774298	0.323619
0.341018	0.341614
0.710672	0.457997
0.731669	0.733868
0.456861	0.329146
0.73055	0.471925
0.648029	0.314293
0.626995	0.505628
0.527906	0.290756
0.786333	0.2984
0.563146	0.515364
0.507629	0.294043
0.574323	0.452804
0.642916	0.335022
0.751216	0.774849
0.749677	0.179989
0.951644	0.596022
0.951397	0.374192
0.704618	0.274183
0.384549	0.545473
0.517164	0.66505
0.528163	0.292723
0.721552	0.431363
0.725864	0.364555
0.715576	0.297944
0.796088	0.324691
0.340931	0.4738
0.918076	0.436336
0.649354	0.619806
0.833579	0.316445
0.916508	0.3735
0.583468	0.581965
0.510584	0.27488
0.716204	0.370317
0.905539	0.265276
0.752012	0.356954
0.787139	0.569698
0.676749	0.629268
0.390468	0.446236
0.494262	0.817276
0.51573	0.637562
0.916084	0.313589
0.845963	0.361486
0.41024	0.286454
0.373247	0.242715
0.596771	0.387148
0.47137	0.688713
0.415069	0.284441
0.841589	0.435607
0.660335	0.389367
0.782026	0.323574
0.656512	0.333067
0.607747	0.229691
0.644268	0.359918
0.931722	0.67792
0.101429	0.358762
0.713267	0.573614
0.612072	0.612672
0.898859	0.369334
0.516354	0.393508
0.634494	0.337878
0.389331	0.447416
0.605378	0.461498
0.91128	0.392374
0.740927	0.600652
0.849543	0.270346
0.697823	0.212411
0.848703	0.396806
0.894557	0.411269
0.845369	0.399819
0.875849	0.419691
0.869775	0.337447
0.734974	0.735578
0.645363	0.417653
0.289909	0.244373
0.724899	0.408515
0.46167	0.303107
0.732192	0.348143
0.516899	0.447707
0.831494	0.575877
0.814353	0.49347
0.692043	0.435988
0.439282	0.359302
	0.295785
0.809849	0.251656
0.403711	0.442793
0.330667	0.415801
0.856482	0.475195
0.650852	0.381827
0.285874	0.249033
0.732594	0.59192
0.521688	0.629178
0.796872	0.422462
0.722409	0.349897
0.592973	0.422376
0.751983	0.383386
0.485721	0.431108
0.48778	0.521222
0.44691	0.627836
0.715363	0.266906
0.724086	0.428049
0.649261	0.192865
0.524993	0.311817
0.687425	0.388604
0.539946	0.786019
0.666921	0.351441
0.513173	0.457452
0.726083	0.460856
0.610547	0.312171
0.583961	0.179444
0.622757	0.311624
0.646901	0.405001
0.617781	0.500573
0.845835	0.535161
0.537867	0.322142
0.72527	0.379514
0.796418	0.375644
0.774765	0.704377
0.579053	0.464414
0.551988	0.550824
0.508801	0.645956
0.659932	0.380809
0.7134	0.384651
0.680753	0.330888
0.874332	0.301042
0.654986	0.422146
0.517062	0.345454
0.624092	0.435654
0.501476	0.0468266
0.815241	0.462832
0.81531	0.398227
0.65702	0.479194
0.805643	0.381081
0.506532	0.278766
0.299571	0.291549
0.85422	0.31335
0.774816	0.220825
0.662087	0.426664
0.596681	0.253322
0.548982	0.359568
0.863601	0.475678
0.850887	0.246922
0.651996	0.238858
0.641159	0.662542
0.545731	0.577735
0.557592	0.421019
0.354483	0.441333
0.688029	0.353646
0.682285	0.373289
0.642229	0.262787
0.902928	0.653385
0.774782	0.462146
0.758733	0.435155
0.756115	0.515283
0.484268	0.534214
0.762199	0.528285
0.464046	0.636142
0.839092	0.3787
0.401324	0.634449
0.610597	0.436508
0.8635
0.525609	0.795564
0.796557	0.840515
0.886661	0.537567
0.510851	0.801747
0.771623	0.754299
0.69394	0.557807
0.801073	0.800463
0.702368	0.870716
0.623448	0.920749
0.698976	0.691095
0.830594	0.837711
0.924747	0.869767
0.655211	0.717031
0.634206	0.528013
0.658778	0.854761
0.680778	0.874724
0.50415	0.65548
0.688055	0.805281
0.778654	0.711873
0.545017	0.839571
0.781932	0.897254
0.522	0.739969
0.406697	0.762821
0.6196	0.693271
0.791062	0.738771
0.507887	0.782148
0.603481	0.752436
0.765883	0.795921
0.618184	0.54996
0.424607	0.585878
0.486556	0.530715
0.67007	0.623883
0.553819	0.796326
0.368138	0.436939
0.600748	0.836535
0.746185	0.67726
0.451055	0.878623
0.728015	0.791352
0.528318	0.823572
0.557151	0.645935
0.75433	0.804459
0.377828	0.530415
0.639027	0.659483
0.402218	0.3377
0.814352	0.49741
0.670306	0.343162
0.511928	0.858975
0.514812	0.697237
0.815631	0.710861
0.396668	0.831645
0.59909	0.606133
0.564325	0.74686
0.553718	0.884608
0.735003	0.526164
0.716126	0.771193
0.54889	0.583636
0.635283	0.497237
0.618982	0.614781
0.696941	0.630394
0.879748	0.885613
0.545347	0.6621
0.576555	0.86589
0.73101	0.862495
0.742223	0.856125
0.689969	0.64699
0.568581	0.367802
0.671749	0.448752
0.875784	0.453049
0.69861	0.881623
0.802706	0.919503
0.729147	0.828851
0.372323	0.655664
0.559311	0.681762
0.580159	0.857828
0.51779	0.887615
0.720873	0.49941
0.736572	0.775148
0.582185	0.575752
0.469197	0.504944
0.728778	0.520853
0.384035	0.438588
0.60712	0.892147
0.826893	0.755987
0.920785	0.813248
0.619994	0.846994
0.879835	0.679023
0.742381	0.469493
0.763738	0.937727
0.256797	0.892936
0.813178	0.576563
0.791282	0.768676
0.396859	0.492094
0.685145	0.781949
0.856892	0.803815
0.854916	0.879937
0.364705	0.914382
0.861207	0.460957
0.780134	0.629918
0.3263	0.840242
0.680514	0.73441
0.664276	0.889131
0.81897	0.515666
0.899562	0.628088
0.637905	0.235373
0.457733	0.804235
0.446612	0.459716
0.577051	0.688376
0.605747	0.881677
0.410224	0.590455
0.771258	0.83377
0.518008	0.568623
0.801642	0.909569
0.643186	0.55395
0.690008	0.485709
0.402909	0.628675
0.598654	0.878153
0.652951	0.685059
0.591128	0.508265
0.608345	0.366119
0.697643	0.601236
0.325078	0.820592
0.38563	0.688093
0.672423	0.638371
0.719737	0.890477
0.596257	0.838283
0.607636	0.508583
0.474576	0.886064
0.667324	0.925839
0.358932	0.678709
0.626049	0.849097
0.664611	0.894125
0.491384	0.857933
0.450625	0.801716
0.647763	0.773321
0.393471	0.870905
0.775344	0.711509
0.440882	0.77406
0.750211	0.906473
0.79639	0.65884
0.741018	0.417675
0.702791	0.684578
0.404312	0.639362
0.855847	0.564484
0.596136	0.703496
0.557637	0.839595
0.520128	0.467942
0.762913	0.550725
0.62427	0.795804
0.548028	0.839896
0.455944	0.763038
0.51843	0.750212
0.850195	0.848209
0.59873	0.753523
0.612757	0.602117
0.695993	0.717289
0.726482	0.672066
0.763898	0.454693
0.412677	0.567699
0.516708	0.685557
0.570993	0.575959
0.786595	0.781149
0.309955	0.298619
0.892188	0.770871
0.630298	0.597594
0.574779	0.65973
0.565516	0.572036
0.614026	0.765807
0.576573	0.784009
0.827109	0.519964
0.547445	0.843097
0.641061	0.821704
0.589324	0.849418
0.583789	0.53881
0.356622	0.864467
0.892605	0.824086
0.402377	0.76266
0.552913	0.85459
0.657237	0.886507
0.786521	0.606756
0.642105	0.753992
0.614879	0.8311
0.756363	0.848148
0.51155	0.615424
0.647582	0.472114
0.671708	0.61902
0.725469	0.79216
0.515692	0.706125
0.554802	0.754175
0.62919	0.817237
0.440395	0.710562
0.72133	0.844999
0.498886	0.696862
0.749063	0.456188
0.568062	0.790098
0.799481	0.750642
0.481654	0.592796
0.828278	0.479884
0.731436	0.20793
0.671227	0.688441
0.22868	0.72988
0.829613	0.895401
0.643805	0.891717
0.603987	0.864608
0.797743	0.748108
0.542096	0.383903
0.661871	0.864639
0.567737	0.647443
0.539682	0.804357
0.621956	0.782977
0.848507	0.698165
0.383329	0.76263
[truncated: 2,291 more rows]
