# Supplementary material for: Pharmacologic activation of integrated stress response kinases inhibits pathologic mitochondrial fragmentation
Source: eLife. 2025 Feb 12;13:RP100541. doi: 10.7554/eLife.100541 (PMC11820110; doi:10.7554/eLife.100541)
Supplement: Figure 4—source data 1. [file elife-100541-fig4-data1.xlsx]

## Sheet: Figure 4B
Veh	Veh+I	HF	HF+I	3610	3610+I	0357	0357+I
1.5556		4.69324		2.71267
7.00479	3.99574	12.5129	3.96335	6.99545	1.6923	8.29654	5.62846
	2.66339	5.70336	4.41512	8.68927	4.92136	7.51863	5.85324
2.47371			3.23795	5.92245	6.19569	6.4201	4.43441
2.96082		7.47798	3.51631	7.76041	6.13794		7.45782
	2.36702	3.64143	3.16431	7.56778	3.94703	12.0818	4.5225
2.55157	4.3791		3.48457	5.58008	3.52054	4.39061	4.50903
3.11145	3.39296	6.60136	3.74258	3.22294			4.787
1.79927	3.29742	6.82362	4.86375	8.06104	1.80095	8.65462	5.16016
2.01158	2.61995		2.49419	4.7778	3.05303	9.46817	4.1499
4.10388	4.22014	5.40078	3.40131	8.17685	4.78323	6.33803	4.47474
2.12357	2.8158	3.37	5.54189	2.85837	1.97064	8.26926	6.11499
		6.80064	7.6889	2.7332	2.7617	4.66499	4.56537
4.7731	2.17611	12.2983	5.11363	12.1857	1.54031	6.79211	9.94537
	3.55574	9.3933	3.53837	4.83817	7.23695		4.39386
2.24469	5.65329	5.97293		2.53233	2.55345	12.1603	4.01871
2.06026	3.10876	10.6879	3.31192	4.68253	2.21001	3.31044
5.83905	2.78114	4.60533	4.52151	8.97408	3.07143		4.96999
2.70396	3.12857	9.46844	3.2138		2.24814	6.8623	2.87355
2.26788	3.06458	13.236	2.71819	3.61513	2.49611		9.18146
4.29562	2.19424	3.18611	6.89005	6.56764	1.9698	5.11438	8.93668
2.55695	3.11082	3.23112	2.2114			8.32236	4.90378
6.90323		4.89453	5.13324	2.842	2.00514	4.76567	3.65757
2.70599	3.43639	10.4549	2.79273	5.9086	2.49658	7.00975	3.19932
3.54517	9.37573	7.47092		11.7632	2.795	3.72174	5.40343
3.7998	3.17799	6.20126	6.14534	3.75286		5.10683	4.03767
3.06085	4.84824			9.10759	1.55329	4.79378	5.96658
2.58139	4.98869	6.68708	2.53564		8.21843	4.65828	4.34693
2.28534		8.77564	3.9137	2.79301	8.38976	4.50941	3.27272
2.38318	1.99734	6.70658	8.06253	7.61674	2.88525	6.3157	7.78827
6.70673		6.66878	6.61282	4.56155		5.76387	3.6468
2.82928			2.34367	3.5593	2.95826	2.90454	2.63118
1.63663	4.82472	10.8068	4.21934	8.21614	3.04471	6.48303
1.97383	8.38506		4.11964	4.86412	5.05415	2.93596	5.14014
5.4243	1.79285	10.4094	4.02996	8.3952		12.9126	4.56049
5.41745	3.67367		5.14378	3.20813	5.19463	6.32198	4.51604
7.18454	3.46403	3.21642		2.72754	2.46956	4.00398	2.74286
2.15645	4.80773	11.0954	8.52455	2.97047	3.16855	4.2748	5.43644
2.01406	2.42824	3.84197	4.93375	7.10097	3.59344	7.00961	4.45391
3.10931	4.85855	7.09087		9.17297	2.94638	9.3577	4.55143
1.97285	3.21286	2.80831	5.68269	3.10264	4.32625	5.89275	4.85902
2.57877	3.01143	3.57573		7.24728	3.85205	3.88	4.09348
7.13753	8.97615	7.16316	2.62061	4.69557	4.0928	7.9695	5.63734
3.63042	5.22554	11.9823	5.42774	6.4407	4.60942	3.05046	5.09914
7.77209	2.59386	12.097		6.07492	2.65044	3.53061
1.9263	2.35019	7.51273	4.64468	10.3129	5.93927	12.8437	2.94604
1.90654	4.1042	16.127	3.38863	5.26938	6.32614	2.65354	5.0179
3.22847	4.51581	5.97097	3.33619	8.58241	3.6261	15.2335	3.39898
1.87241	2.83023	4.55116	4.22978	3.79384	3.93695	4.21147	3.31702
7.29832		9.273	8.18413	3.991	2.43011		2.85898
	3.62674	7.47952	3.73837	4.40535		14.9334	9.29633
1.82566	4.18559	3.95215	3.64611	6.57704	2.52699	3.42244	2.68154
1.8441	4.16736	3.91152	2.70231	10.7533	2.49699	7.03201
2.78654	6.21971		5.77798	4.67349		4.59204	3.21991
5.63931		5.88602		3.52838	2.60569	6.55029	5.29565
3.27171	2.56838	11.359				6.49295	2.90727
1.73924	2.28913	2.75263	3.68901	6.72098	6.3817	12.7232	3.68339
1.53312	8.1935	11.106	6.59541	4.73824	3.84315	3.51703	1.99925
2.59495	9.14664	5.17618	3.3187	4.46921			2.84108
2.56984	2.14332	5.18477			1.82815	9.23502	3.65889
5.2966	4.767	4.78599	3.95895	6.88741	3.18531	8.57761
5.96048	5.63034		6.23352	4.22427	5.5265	6.68574	3.21826
	7.16945	4.40924	4.39244	5.54568		5.75607	4.68089
2.71713	3.52714	3.00087		7.48059	5.564	4.75805	4.58865
2.7242	7.56918	8.995	8.9207	5.06865	2.48555	8.82545	3.93845
2.60046	2.44916	9.53071	3.77891	5.96635		8.91239	7.21391
1.7186	3.26964	10.0141		6.40526	4.78303	6.87772	3.61342
1.80191	8.70442	12.769	3.29351	2.87941	3.2588	5.57969	3.82944
2.45969			2.98365	4.38353	2.18251	11.7208	4.45114
2.84111	1.86022	7.98822	2.1103	8.19547	2.74136	5.48983	4.39315
6.03105	2.45757	6.52788	3.94919		5.22666
2.86354	3.94801		5.3669	3.23256	2.17223	2.41336	3.74458
	7.1898	5.83872	3.16455	2.70815	1.69371	12.768	2.38164
2.02998	4.63103	7.53897	3.42249	6.56828	4.84301	5.71371	2.90487
7.57893	6.7684		2.95795			3.17257	3.53206
4.42551	1.89742		3.33751	3.54735	1.73869		4.09178
1.67018		12.0565		4.37581	3.22713	10.7327	3.40207
3.60379	2.23432	3.8867	2.41238	7.83781	2.71259	3.53865	5.20543
2.16121		6.80009	2.98518	7.08438	2.67475		3.45853
1.90018	2.49971	6.50227	2.69227	3.75048
3.5273		4.68799	5.47775	5.61685	1.53973
2.35509	6.51813	10.5573	4.7674	6.77695		4.70337	6.44208
2.48726	6.24252	5.39747		12.7193	2.21287	3.85786	3.31165
2.24717	4.94089		3.97451	5.9857	1.45661	12.3278	3.28069
2.58218	8.04884		3.53159	3.53778	3.77022	3.46119	3.06671
2.53083	3.55573	10.5128	7.92917	8.9502		5.123	4.65343
2.72346	4.18833	3.1748	3.86348		3.23066	5.07777	6.34688
1.88261	7.71384	4.99923	5.97393	4.36604	4.91694	4.72622	5.58753
1.36181	3.00326	4.02744	3.45933	4.87656	2.36465	10.3953	4.00069
3.24637	7.5782	9.06283	2.28342	3.99171	7.92432		3.8571
1.85471	3.9969	2.58888	1.88282	4.82378	1.8342	10.7684	2.01862
2.50163		4.61867	7.97231	4.78926	2.41322	7.84849
2.23843	4.70387	3.54636	2.23056	4.50975	5.84612	6.67152
7.08595	8.10696	2.77029	5.95747	3.91939		7.55903	4.28907
2.45206	8.36784	3.51079	3.01009	5.37238	2.22388	5.45726	4.51994
2.07103	4.12221		3.58053	10.1344	2.92169	8.05951	6.35469
6.70551	3.80272	11.4554	3.91972	5.75586	1.83885		4.43463
2.00034	2.47174	10.6047		7.75633	6.10181	7.05822	6.11481
5.50932	9.11523	3.88715	3.35837	3.33696	6.43739	8.31704	3.56682
7.82245	2.47977	5.74817	1.95051	3.3696		10.1176	3.87516
2.7149	2.74088	6.84984	3.27533	4.19687	3.59385	6.15623	4.75247
2.3427	5.90382	7.75704	5.90626	4.28073	3.54987	6.48276	3.7036
5.6174	2.85776	5.75558	3.36245		1.91426		3.14085
4.92603	2.78401	5.92717	1.80819	6.90816	4.5826	6.8418	7.91283
1.87864	7.33475	8.37509		3.83798	2.09141		3.41071
2.93925	7.24722	4.96069	2.07755	4.89355	9.03967	7.45304
	3.51163	15.967		3.84117	2.8239		2.72335
4.74841	2.91426		4.0607	3.87033	6.96881		5.51939
3.25637		3.77218	4.63777	4.50256	3.06194	6.18259	10.0847
4.78389	3.49135	4.24309	3.65434	3.29187		5.90451	4.53637
	2.92395	15.1473	2.74853	5.97356	2.88923	3.93039
3.62556	2.06665	3.22297	10.0492	4.40952	3.93864	12.264	8.40692
1.98662	3.48265	15.1498	2.0289	6.75999	3.84971	4.25171	2.23206
7.65941	2.37378	5.80828		3.85873	2.99986	11.5713	4.01972
2.07347	2.14848		3.66187	6.52069	3.99057	3.2052	2.89874
6.54853	2.94572	10.0265	2.43628	4.51597	3.47472	4.52234	6.05661
2.83665	5.04971	2.98381	4.32726	10.9084		3.95657	4.52537
1.79277	2.6386	9.34504	3.44593	4.01756	4.90385	11.6775	4.31179
	3.96951	7.02899	3.08749	9.07682	2.26982	4.24196	4.7682
3.2653		12.7287	3.97598	5.99054	2.39588	9.55914
	2.12956	8.11923	7.26184	3.28379	4.83456	5.35463	5.68016
2.288	5.77296	10.2669	1.84299	5.04092	8.81212	4.08183	4.66545
2.76947		6.15484	3.18421	3.01693	1.54668	4.11194	4.51987
2.8325	1.5273		1.82304	4.53874	3.59521	10.1482	4.56078
5.66357		3.77972	1.82767	6.80354	8.17334	7.0909	3.43323
2.27656		2.82898	3.45569	5.64619	2.16715	5.10982	3.40641
	4.39384	2.7828	3.17027	4.85307	3.33725	5.3412	2.65577
3.59758	2.46695	4.49666	2.45154	2.26771	4.62706	3.95433	4.52678
4.27946	7.47488	4.78269	2.11818		4.15024	5.96809	3.07019
3.50121	1.69271	3.04023	6.02267		3.43831	7.09967	8.0551
2.43619	4.95455	4.82709	2.17557	3.38939			4.51589
1.87399		3.02396	3.35684	3.7236	3.63972		2.39992
5.43703	3.62393	3.46598	3.40388	4.11326	4.00131	4.70647	4.59317
3.1178	2.89828	4.04683	5.35366	8.40053	4.41797	3.89802	3.52092
2.38205	2.18448	3.94739		7.40991	3.64843	3.62668	4.39003
2.37747	6.94805	4.17094	2.95818	6.91791	2.43923	6.97565	2.3945
2.39924	2.7702	5.71741	6.39017	3.72929	3.6304		2.21339
4.72197	2.85532	4.13045		9.06628		5.52083
3.45667	2.34883	3.44038			4.72405	7.3387	4.69917
2.89413	3.29344	4.85538	4.2438	4.36302	2.74115		3.07469
2.07094	8.52222	3.4995		2.72132	4.52867	9.46338	3.56156
2.86009	5.42392	3.19936	5.40538		2.951	9.76222	2.88986
4.18933	4.7448	4.42555	7.37601	3.97069	9.40152	4.55178	4.51298
2.64111	6.3998	3.27132	5.42604	9.69296	2.86037	10.1723	3.22964
1.52892		3.8214	5.24803	4.87446	1.51279	5.07912	4.74897
2.42103	4.80173	9.5777	4.07729	7.79935	3.70081		4.88033
2.15875	2.72919	4.74272	5.62924	3.87553	3.4733	6.1208	6.57175
2.18274	4.33792	6.23486		4.98438	3.615	12.6036	4.94477
7.47623	2.44818	4.38105	8.38225		5.42874	4.92889	4.84466
2.967	2.22797	5.16362	5.34935	12.097	8.85797	14.3728	3.47071
5.06268		5.50757	4.04993	3.03214	5.68129	12.4564	3.04546
4.56664	4.75186	6.90228	4.3103	5.93068	3.54492	6.63351	3.17365
2.05005	4.35916	3.2151		8.73829	4.43782	6.96237	5.30578
2.28165	2.20037	2.87602	2.8686		7.67146	9.36514	2.60966
2.92809	2.39938	3.58373	3.06104		2.77666	3.6419	6.46832
	2.18985	2.95384	5.89157	5.56381		8.85893	3.40134
1.78835	3.61381	2.57703	7.79131	6.65249	3.46263	10.7843	5.12808
		10.8878	5.82078	7.67339	2.78569	2.20955	7.02525
3.66774	3.86511	16.1161	5.96117	10.0554	2.80151	5.12665	6.10582
1.74741	2.96686	3.4724	2.43592	6.78338	4.36584	3.96336
1.50122	3.73991	10.7539	9.98074	11.3072	4.14969	4.52307
3.72447	4.6097	4.41273			3.47908	9.76128	3.4886
1.96899	4.50914		3.17974	3.20813	3.77443	3.77215	4.9548
2.58272	2.92701	5.7202	2.3593	6.39052	6.68283	14.0838	4.09739
1.84839	3.85889	5.3176	4.58824	3.32787	3.71432	6.50491
	1.77759	2.5385		8.76908	2.41864	5.45427
1.7977		5.44879	5.17873	8.86573		5.43141	4.52578
2.18984	6.06615	4.07059	3.01845	6.13662			5.95209
6.35558	3.84981	7.7527	3.57113	9.35677	2.59494	3.03221
2.54812	8.02808	10.2464	4.18021				4.43064
1.6861	1.7479	3.65469	4.17032			4.81227
2.24796	6.27222	4.00232	3.00686	8.72925	2.77775	7.55539	7.86024
	4.77935	3.0893	4.46793	7.26672	6.23837	4.01173
1.49841	2.46309	7.35512	1.99031	6.13267	2.50712	3.74377	7.41118
2.24358		4.58215	5.40628	8.1986	3.47826	12.3996	4.44541
	3.12061	2.65828	2.50024		3.08674
3.38647	3.13927	2.92534	3.79378		4.95252	9.20946
2.34297	8.11861	3.43404	5.50725	3.48829	5.29541	3.23357	4.93344
1.83406	4.98404	2.60477	4.01132	3.60902	4.10944	13.3382	4.33688
1.96572	2.22101	2.3813	2.63353	3.77633	2.57317	4.01051	6.51611
3.10338	3.08123				8.29372	5.69559	4.55542
4.07491		3.28259	3.30565	9.63295	3.09735	12.1729
	2.19863	11.735	4.51274		8.93628	10.8525	11.2153
3.75932	3.43359		2.96429	2.95164	1.90377	3.61134	4.67981
3.48933	4.67506	12.9271		4.80272	5.75732	3.84309	9.17508
6.99724		4.20801	6.39349	7.21687	3.12475	4.4835	6.34836
2.16199	5.84717	8.53165		4.59393	3.08216	5.20372	4.5661
3.62413	2.98245	9.0798		3.78066	8.64293	5.31608	4.35004
1.93767	3.78586	10.2073		8.24924	2.77545	4.73571	1.97192
3.35976	4.68887	7.43392	3.34805	3.05501	2.58766	4.28283	3.87343
2.89777	3.19682		2.721	8.10685	4.0196	9.87646
	3.2551	6.95513	2.5589	6.2227	2.13698	4.17473	6.49564
2.88797		5.03885		7.98865	2.33015	3.59717	9.24164
2.96546	2.18754	9.70678	4.1013		4.30897	6.21557	2.36415
5.87241	6.95262	6.71899	3.88202	9.19624	8.54062	5.74413	4.71187
3.19307	2.28499	3.00456		4.26222	6.25846	5.91486	2.19471
2.45967	4.74768	3.30348	4.59437	6.78805	2.50445	4.47775	1.62659
	6.06993	5.05737	4.56435	3.46587	4.63535	7.60102	2.50964
	4.2487	7.3615		3.83689	5.34059
2.48005		5.22823	4.5745	4.32527	3.27787	6.75571	1.80087
2.99748	3.6344	7.41813	4.36588	4.43983	3.28021		1.97623
3.27068	5.76845	6.16871	5.24886	4.81371	3.62307	5.33156	1.93597
3.62752	6.13299	4.76373	5.6074	6.22994	3.41414	6.64039	2.04685
5.4018	1.80799	5.53674	3.27746			6.14371	2.60443
3.65752	2.06535	7.66274	5.57618	3.87543	3.46242	4.07357	2.64905
7.5871	1.93482	8.32174	3.21899	6.35171		6.05596	3.03924
3.54506	2.29086	5.2506	2.17225	4.70854	2.67185		2.59326
3.07487	1.91497	10.0689		3.53961	3.13379	3.39142	5.32486
2.89176	6.7067	3.39281		3.01979	5.92929	2.92997	2.72665
		5.86174		6.91396	2.71745	7.91011	2.27037
2.73949	3.92677	9.84753		3.88836	2.7495	7.1425	3.08924
	4.59877	12.6414	6.81718	8.48295	3.64889	8.89959	2.1637
2.27213	1.7127	7.44379		4.71245		12.2787
5.81717	3.72546		2.45288	4.1713	2.45596	6.16296	3.88744
2.73056		6.75677	2.62165		3.70929	3.85608	4.96658
2.64116	5.72203		5.94975	6.27487	3.08741	4.91065	4.45079
2.61393		3.99363	4.97442	3.86695	6.91864	3.3968	1.46592
2.33942	4.15268	9.38535	3.23389	5.90544	4.29395	3.78021	2.35623
	2.87778	3.18605	3.35841	4.21308	3.28305	3.26562	5.60562
1.93344	2.47738	5.59401	7.24114	3.98717	4.04201	3.92696
5.26379	3.12657	5.05009	3.77647				2.78287
3.55252	4.15742			4.97073	3.66356		3.96165
5.72702	2.17891	10.3117	3.98852	5.18099		7.1635	2.58842
2.59423		12.4257	3.30916	5.64579	2.19767	8.08456	3.88017
2.93479	3.57708	4.48174	7.43545	5.43507		3.29555	2.02625
7.94205	2.04992	8.14577	3.22161	2.88916	7.46381	6.82428	3.05015
5.98996	3.26428	6.25471	7.51997	3.42628	3.971	8.09761	2.11416
4.73003	6.41266	10.7203	5.57355	5.75584	5.44949	4.09836	6.13422
2.3997	2.02002	10.9024	6.71566	6.72304		7.42336	3.15041
2.87877	2.70736		3.5247	6.90151	4.50082	4.33852	3.09858
4.03151	2.66753	14.4429	7.5381	7.58689		4.7668	3.20253
2.89507	2.28506	4.0593	4.06756		2.37737		3.61748
2.37148	4.60435	11.0214	3.23982	5.33208	3.45442	3.44296	3.93937
2.90916	2.72377		4.41857		3.79803	13.2301	1.67335
	2.81812		3.50906	4.27385	6.2959	3.33082	2.44104
7.28922	3.79012	6.1851	4.00902	6.96827	7.10092	6.46326	3.10464
3.61998	2.24991	6.36259	5.06101		4.90813	3.25864	1.8474
2.52045	3.09853	4.71512	3.72831		2.47252	6.64539	5.59781
	4.54488	6.1708	2.69234	4.21181	2.30315	3.55697
1.49255	5.92343	3.44413	4.8703	7.84871	2.23289	11.2149	3.93521
2.65739	3.81487	2.66845	5.99975	3.53775	2.79466	3.03346	2.9324
5.66489	4.05053	7.9838		3.08829	4.23138	3.76387	3.55119
3.98421	6.45427	4.60052	6.02665	7.12741	7.82954	6.56482	5.40953
3.60732	1.95901	8.05043	3.91118	3.21149	2.76497		3.81982
3.09398	2.90714	8.87368	8.57234	3.57164	7.46979	6.59344	3.17871
1.96863	2.78769	3.08435	6.33719	4.89082	3.65989	6.3488	2.55911
2.72197		8.38868	3.112	3.21165	7.08411	4.93315	2.51392
3.99423	2.0034	4.10602		5.17743	3.95944	9.54633	2.51892
5.39339	2.56028	6.12231	5.91047	9.11363	5.63798		4.73459
2.5181	2.5967	10.1587	8.39233	3.76964	1.94707		5.23849
	4.03642	7.08291	3.64618	3.14326	3.45572	4.59206	3.4715
1.76704	2.29448	6.2699	2.92328	4.68053	5.10397	4.9191	3.23886
	1.99947	2.82454	2.81429	4.31855	2.23297	8.53011	1.90807
4.62715	3.04414	4.81248	3.98444	5.65608	2.30648	13.383	2.94102
3.5468	5.84523	10.087	5.16708	3.60086	8.00418		1.87474
2.20911	5.11578	6.80175	8.65775		3.28864	3.8754	10.4812
3.13834	8.64052	13.767	4.13713	4.97142	3.35554	13.1401	3.69684
3.44335	4.25131	3.91472		5.81796	4.22849	4.13184	8.90114
1.6945	3.14101	7.62045	8.76799	3.91907	2.4898	5.42548	8.1049
3.19855	5.55738	2.8721	5.99163	4.46924	2.05959	3.14357	2.28578
2.70963	3.37651	3.86535			6.12468	4.56938	2.95934
2.6398		3.34017	3.07218	3.09637	3.47368		3.02889
2.55359	7.575	8.62241	3.51562	4.19542	2.89764	6.85031	3.45168
5.18159	1.95993	7.89487	3.34028	7.28648	6.56859	3.72473	3.07187
5.66368	3.49976		2.92195	4.87007	6.14566		1.85931
3.67175	1.78203	7.93749		2.40024	1.92183	2.93536	8.26842
6.07689	2.70151	10.0337	3.89094		1.84718	2.94862	3.84355
2.22278	2.57271	2.93198		12.8149		6.20947	9.87666
6.61543	1.91662	4.80061	4.16563	4.75281	8.68384	6.49483	5.08554
1.86031	5.50854		4.13705	2.52465	3.4182	11.9131	10.0498
4.8801	2.00859	4.14199	2.50925	5.66426	6.68645	10.9709	1.95851
1.77071	3.33762	5.76955		8.74237	1.82442	6.82867	5.34362
5.70966	4.13371		5.97778	3.2621	6.97712		5.80667
1.82536	2.26593	11.624	2.44364	2.61447	6.43323	8.95712	3.3587
3.26636	3.36155	13.9785	6.25089	4.70529	2.76392		6.70541
4.45642	4.278	4.68079	3.47397	4.19308	3.94439	3.13846	10.3476
	1.87506	6.06811	4.95755	11.502	3.17326	3.30603	2.26096
2.1256	3.88992	9.46643	3.43296	3.7408	5.15801	4.12836	2.35805
2.08733	3.12061	4.8697	3.68468	7.91275	3.0425	6.29456	1.21136
5.56293	3.49954	3.51535	6.81527	3.69968	3.34493	2.98353
2.22444	3.92221	4.26967	3.1895	4.17959		10.6154
4.25027		2.76624	2.35798	9.81746	2.20227		1.74463
2.74903	6.30811	5.30018	3.42466	6.44665	1.9516	3.59447	5.29372
5.66464	3.42299	12.7285	2.68392	5.80849	2.66419	10.3286	1.37851
3.70444	3.22449		3.80329		2.58653	13.9617	3.50212
2.96973	4.65413	7.12516		3.42091	4.21191	6.09796
2.29577	1.77691	6.24529		7.36185	5.03153		7.83017
	6.10831	4.75279	1.72095	12.1338	3.48469	10.4173	3.89226
3.05809		6.21272	4.82713	3.49049	2.55662	2.91196	7.74247
	5.47781	11.172	4.03049			14.2387	2.90771
2.18168	5.57675	6.01345	1.86441	8.83457	2.7178	8.07588
4.27281	2.39604	6.11075	1.59936	4.18409	2.42449	6.56828	9.22589
2.65121	2.29952	3.39965	1.85347	10.9033	6.09276		6.35257
4.54137	3.74232	8.08574		6.8613	3.78	7.17057	2.99564
5.19765	2.21485	5.76324	4.54996	7.95999	5.40828	3.65926	10.2378
	4.28654	9.82809	2.56097	7.25216		7.31242
6.40942	3.09483		3.1519	3.02787	3.16607	9.00143
5.16483	2.11376	10.9806	6.88228	6.10969	2.67488	3.53729	6.11261
	6.65032	4.4906	2.32359			6.22136	2.48847
3.80331	2.18948	8.43618	4.78593	4.5549	1.97535		1.28292
		11.0408	1.89734	4.93449		5.06798	2.3793
4.8027	3.80669	6.81165	1.98151	5.32191	3.51537	6.7953	2.76118
2.84738	2.75766	4.99712		2.49185	4.27814	3.64264	1.75914
4.52693		10.1895	2.77644	5.2358		3.68304	5.92008
2.37801	3.86347	5.13268	5.99551	4.63786	5.25455	13.753
1.59407		12.5465	2.62634	3.77167	2.66783	8.12236	1.57491
2.06036	3.49223	5.17221		3.66536	1.66199
1.89142	1.80104	6.96784	9.40559	2.96715		6.45525	3.46434
3.03124	3.50765	8.54411	5.88547	8.24383	4.34711	2.78598	5.34761
	6.15544	6.46545	1.62442	3.97527	6.79444	3.51875	5.82923
7.47633	1.70606	4.26412	3.15085	2.48345	1.96025	3.89883	3.20824
4.52183	8.79922	3.32451	2.05629	10.1495	7.43616	3.52634	2.96111
	4.24291	3.31172	1.83684	6.98904	3.65242		3.96007
	4.48308	4.73615	5.17769	2.87585	2.31598	4.39371	3.45257
2.77027	5.02659	3.20705	3.25272	3.04613	2.30884	2.828
1.81923	4.22765	11.9355	9.25994	4.38576	6.34909	8.24199	1.33663
1.53701	7.55734	4.67101	3.2915	7.18317	2.96427		4.03514
3.37154		5.91331	3.6803		4.1367	6.16151	2.43009
2.3746	2.81355		3.35709	4.38671	2.72914	3.47548	2.86127
7.79901	2.62906		6.18907	4.51775	2.13495		7.82011
3.95302	2.717	6.28476	1.64939	4.05362	8.38632	8.50339	2.71036
6.57652	1.97979	14.3116	2.12759	10.3106	8.2271		10.6636
3.4155			6.93288		2.27769	3.56853	4.94966
2.32985	2.28004	5.7003		2.78062	6.60924	12.2881	4.23888
6.27124	7.35442	4.26765		12.6259	2.95462	4.19479	3.37067
2.37135	5.27557	8.63528	8.03581	2.3989	3.04372		4.07447
1.54402	3.65509		2.39679	4.52049	1.97411	8.04907
		8.2105		4.04686	5.77439	3.51705
	4.86783	11.7985	6.61742		7.68076	8.11652	4.57563
2.32408	4.96317	3.95873	3.59556		5.79944	4.73913	3.65443
3.64142	5.38911	8.43058	7.17534	7.90982			10.1103
1.51851	6.00404		4.85717	3.88802	3.72013	3.70367	2.31204
2.2292	2.7876	3.23921		3.12124	3.21656	4.1361	4.90756
3.04095	2.45057	15.8921	3.05208	2.67433	2.05202	11.331	1.94418
	1.86448	11.5479		5.75025	8.18652	7.96014	3.15888
3.87128		5.75559		7.44151	2.81834	7.68378	5.70959
1.88249		2.66838	6.67583	6.9028	2.62621	9.4136	2.24094
4.55224	2.62275		7.42211	6.57782	3.20511	4.44878	6.25373
2.72803	3.05708	2.5475		6.67474	5.10695	4.6313
2.17438	3.07745	3.39273	8.02773	4.78335	5.62961	8.21714	5.56022
2.18903	2.46851	2.90197	6.29083	11.0858	4.01331	5.32322	1.80435
3.01237	2.02224	5.34371	7.73974	3.82236	8.12516	8.57829	7.11978
2.95901	2.2871		5.16108	3.26294	3.70181	12.2269	3.76789
2.80257	2.50592	4.84576	6.51953	10.4554	8.40109	10.1759	4.1258
1.67165	5.51051	3.26747	7.31514			4.95032	3.55282
3.06911	3.85913			8.5667	3.9201	6.13964	4.10604
1.72796	1.82533			2.78524		5.32058	1.8199
1.86897	4.8503	3.65332			5.01221	3.96166	3.43181
	3.25978	11.6538	3.08576	9.64709			3.29693
2.44454	2.99812	10.8679	3.11138	7.76306	2.6524	9.34804	7.03383
3.40628	5.97177		2.02927	2.68412	2.96667	14.6882	4.61337
6.85338		4.42658	3.24646		3.1506	4.61348
2.25676		3.20515	3.1572			2.85773	1.90199
2.74088	7.20898	6.12153	1.94901	4.6562	2.24088	13.0051	2.33484
	2.72765	2.88962	2.52641	5.77541	1.316		2.68575
	2.555	6.57317	2.13377		5.47522
3.8456	3.12081		3.02203	4.28117	5.10658	5.48346	5.45983
2.91209	3.57788	7.66703	3.23379	8.42032	1.77216	4.45042	2.34992
3.8004		10.3279	2.13737		2.6127	13.2428	1.82532
4.73221	5.31355	14.8447	1.96759		2.19519	3.04158
3.64404		13.3063	2.84035	4.69063	2.38641	6.05615	1.90869
2.94871	2.58166	6.02443	2.91223		2.32494	8.40495	1.7705
2.40841	1.87645		2.40922			4.91078	1.67332
2.98939	5.98114		3.13218	6.70062	3.93153	2.73248	2.50808
1.50607			3.0332	3.93764		4.44046
1.72092	2.09655	5.12419	5.09208	4.75629			2.84346
	4.15112	3.45093	3.44701	6.28426	2.46325	6.17722
	2.4847	3.6604	3.20053	4.47249		4.02158	2.19687
		5.43471	8.08518	3.91711			2.14621
2.45697	4.96126	11.1107	2.63146	10.0621	9.06978	7.12996
4.66845	2.37021	3.98301	2.88476	4.91862	2.8576	9.33054	2.39046
2.15934	9.19712	6.08084	4.3587	3.82616	5.44914		3.13394
2.3709	1.98475	10.5009	7.80521	4.5349	2.13935	6.82454	5.15472
	6.28877	3.83209	2.36504	5.7305	5.34096	8.66801	2.10019
4.08511		6.42628	3.12359	3.9826	2.42912		6.89701
1.81614	6.78535		2.64172	7.51727	2.07861	5.33775	2.86598
7.89648	4.9817	3.32269	5.02823	8.70659	6.26476	4.23448	2.21554
5.93201	4.79694	5.66138	2.93863	12.9995	2.34558	4.72939	3.10654
2.18311		9.70247	3.10412		1.96149	2.6386	4.16811
5.45277	1.95367	4.48271	2.04593	6.87325	3.71832	3.90218	4.27094
1.73772	2.35445	6.44398	3.11306		2.30124	8.61012	2.07928
2.2584	2.59918		2.89259	6.06263	3.05928	5.27219	2.30089
2.83095	8.74792	3.2583	2.86086	7.55208	3.45796		2.21474
2.57784		2.92107	6.00069	4.20177	3.51014	4.7798	1.77222
	3.88852	3.31403		2.98526	5.29379		4.03277
6.3597	3.0506	3.52153	4.64624	3.35089	2.79869	9.79471
			1.642	5.4908	1.49846	4.08328	3.93399
2.52258	3.62289	3.92593	4.53014		5.57833	4.23083	2.07436
2.35572	3.08074	3.93781	4.29829		3.54544	3.10037	3.00593
2.3636	2.25334	8.09941	3.12267	3.95969	3.58642	6.34032	2.63844
2.37915	2.30516	4.47189	2.23022	3.86181	1.91767	4.23247	6.39845
		11.3745	8.46095		5.15656	3.50154
	2.24902	4.01295	2.40596	6.92532	2.94972	11.7257
2.39228	3.97226	3.37692	1.48235	7.14905	4.59529	7.216	2.23111
2.23267		3.79401	2.94507		2.73244	3.71602
1.75469	6.22652	4.63394	8.24922	3.70651	3.69685	5.6175	4.76104
1.33209	6.0806		5.95035	4.54326	6.97638	3.77783	7.5251
4.02187	8.71401		2.86962	7.84299	5.66155	3.94911	5.87499
	4.83393	12.2066		3.6215	3.83981	4.24432	3.21013
5.06498		9.11236	5.3186	3.7331	2.51186	3.29367
2.47021	9.14197	3.40505	3.50092	6.80446	3.29064	4.14987	2.38181
	5.26543	2.81616	6.24802	5.06361	3.22444	7.51276	5.37663
1.7968	2.02917	10.7694	4.06336	8.04904	2.30121	4.18581	2.72029
4.23866		5.74289	4.00921	4.07713	5.1003	5.17717	4.60152
1.7998		12.414	2.97526	4.7653	8.18289	3.8136	4.40244
6.77291	4.19452	3.51842	5.25603	4.35173	1.59843	2.81954	2.10034
2.19622	3.66696	8.39415	5.61438	7.80257	2.2643	4.86029
	2.45146	15.8718	2.17336	3.02356	4.04462
1.96838	3.60498	9.40466	3.01215	4.42316	8.1978	4.84724
2.82458	2.75345	12.7536	3.39361	3.84656	4.26077	3.75298	3.54932
	1.51378	4.16155	3.37688	3.55042		3.26807	3.5471
2.08301	2.58682	6.48814	3.43405	7.75717	1.96441	3.15115	2.20692
4.51243	5.35033	3.26302	5.31469	5.15527	4.64221	3.40317	2.34783
	2.72205	8.29825	3.60739	5.42152	2.42712	3.56482	4.31809
3.27656	6.65543	8.57677	1.56716	9.38984	4.82729	3.88655	2.45592
5.4454			4.7621	5.01344	5.49518	6.09952	2.39047
5.99434	4.78352	3.87012	1.66867	3.38499	2.19498	5.76942	5.5128
3.82644	7.62335		1.65198	5.20819	1.50842	10.9242	2.51372
2.10557	6.91449	4.68178	3.18318	2.48415		2.67491	2.66975
2.17672		5.41306	3.00609	4.79784	5.28423	5.46337	2.12857
1.98309	2.88837	9.74174	9.55879	10.9723	3.80215	6.57973	4.23218
	3.08594		1.59159	3.24857		2.90915	4.51981
2.70782	6.50681	4.50421	2.43549	3.07313	4.74508	3.75088	2.6207
2.06235	4.23166	4.37051	4.01462	4.92447	2.63801		2.90366
4.93967	2.34241	15.7546		3.69815	3.23718	4.8835	6.47797
	2.63998	4.00385	4.8726	4.97522	2.7553	9.39114	6.8701
5.24467	2.78619	6.60849	1.78539	5.11882	2.09696	7.55287	5.07411
1.96479	4.27493	5.71788	5.82266	6.16565	1.83188	8.66719	2.86171
1.75982	1.97781	15.3784	5.38529	3.90159	6.76714	6.78889	4.47435
2.76119	4.72385		4.08842	4.95686	2.24304	3.03165
4.41608	3.94447	13.8985	6.05705	4.8466	2.03281	10.7348	2.03703
2.38282	2.13077	4.88399	1.75637	4.68071	2.53032	4.77144	10.2298
2.85795		4.62941	7.23279	9.22812	2.17423	3.327	4.70754
3.10469	2.12122	3.03421	1.8005	3.66105	5.35107	3.56919	4.07403
	2.74483	5.89786	3.26842	2.7474	4.73892	2.86925	2.4052
1.68157	5.85225	4.98657	3.60052	5.51472		11.932	1.79419
4.02673		3.89163	2.73171	2.9872	7.03896	7.1441	2.99828
1.66666	3.95056	3.71443	3.64735	3.46122	6.47339	4.49617	2.41866
2.67106	3.40243	5.51295	6.72363	3.62816	1.99752	13.1011	1.60775
	5.6376	4.21301	2.97518	4.21202	2.18322		1.8708
3.75499		3.20998	3.25276	4.35057	2.61278	3.33359	1.90456
	7.0941	2.85071	4.54731	6.62524	2.13819	14.3548	4.25226
2.11312	7.18393	5.73483	2.47167	3.99039	7.26247	4.09044	1.8722
2.26272	3.48334	15.3918	4.99548	7.35193		5.51297	2.51374
1.47232		4.66385	2.16772		6.32312	5.6983	2.61666
		5.57129	2.62665	6.51062			2.26637
1.77483	8.95877	7.64047	6.42541	5.59796	2.00442	11.3526	2.57296
1.43137	2.53761	6.08184			1.73799	3.55363	2.87122
2.19098	6.93057	4.86227	1.73654	8.16851	5.44772	3.69508	5.2784
1.58204	3.88351	4.25603	1.90553	6.00775	3.05301	5.41132	2.40122
3.07565	5.93845	10.4342	3.804			7.84044	2.81977
2.63312	2.63336	7.47348	1.7326		2.17881	7.90277	3.82991
2.88461	3.58722	7.31461	5.95628	3.27162	4.1902	4.61322	8.92109
3.30405		7.44919	1.85082	3.56191	2.96781	4.17624	6.85807
2.07645	1.80731		2.79416	6.16875	2.33027		1.87006
		4.35599	3.26495	5.81013	2.65766	7.19804
2.17116	4.73027	6.69881	2.37182	2.64254			1.98317
3.74562	4.99947	5.21266	9.02156	4.16226	5.22356	5.24609
2.63455		5.78885	4.5435	8.08136		11.1579	2.33519
7.49388	6.08987	2.79323	2.86727	3.33817	3.27942	4.47791	4.12051
2.37075	5.00414	5.60631		10.4115	1.61344	13.8614	3.37764
2.40108	7.60733	7.63437	4.23977	7.01332	1.86286	2.95892	4.08723
1.94714	2.02081	9.98273	3.74921	5.67741	6.4258	3.70056	3.55281
3.9928	6.06383	5.84262		3.40112	1.99583	3.86877
2.32642	5.66104	2.99611	2.01783	2.91349	3.06841	6.48542	2.6253
1.95387	3.43938	6.25565	2.08263	3.01714	2.8533		2.05807
2.15464		3.43757	8.41645		3.49712	4.26446	6.26383
3.18651		4.97992	2.13218	5.28197	4.56802	3.79789	2.85792
3.16586	4.16084	5.49683	6.77267	3.76323	3.51691	4.86353
2.07599	5.21286	3.58009	5.91534	10.8761	4.29779	3.66147	3.51536
7.84293		3.28515	3.95168	4.11882	5.60541	7.19897	2.19289
6.07498	9.08763	7.38372	3.00987	3.8475	7.89179	4.33018	2.70976
4.96785	2.98087	4.07162		5.74681	5.21436	4.60392	1.51554
2.27661	4.89243	2.9044	4.25722	4.78267	3.71854	7.02838	5.69479
1.92397	2.43486	3.8792	2.27592	3.34615	2.08707	2.78375	4.87037
3.03938	8.12448	3.73537	3.83667	5.24712	1.94602	6.25108	3.54799
4.57098	2.17467	7.63851	4.45929	6.9954	3.02809	10.983	6.86812
2.4332			1.56149		3.54392	6.69652
3.30835	2.18241	3.18298	2.147		1.99788	5.77765	3.37783
3.43423	5.412	4.22038		11.1138	4.13596	6.24641	2.92227
3.15015	4.02728	7.40432	2.50461	3.53236	3.95148	3.95792
4.88962	3.65483	5.70384	2.44989	9.57339	4.26138	11.8481	9.67012
2.34045	5.58708	7.03298	2.54644		4.29726	3.63179	3.65968
2.36115	2.78519	8.22002	2.96141	6.20559	7.43834	8.79512
		11.7528	2.86139		2.73708	7.35156	11.0973
4.71764	9.30458	5.67915	5.83708	9.80343	4.49893	5.89295	9.02375
2.47882	1.5856	7.52049	3.28979	5.02914	1.88405	4.50505
1.94501	2.62658	4.25285	1.76917	9.30029	2.2162		4.01891
2.09681	1.85722	11.6446	3.17903		2.27489	4.20923	10.9381
5.98099	5.17537	4.03864	2.63245		2.85937	6.42522	4.65263
7.05769	2.33298	3.81346	3.29739	4.90292	3.7568	4.08966	5.8949
2.32264		5.4064	2.38175	3.00099	2.38579		2.8528
6.13486		4.28608	1.71053	4.6657	1.88045	4.12761	4.01596
1.39028	3.89371	5.22028	3.04692	8.16254	2.60413	8.67689	5.77106
1.44292	7.69955	8.76357	3.2946	9.81818	7.42858	3.16579
1.90709	2.04668	5.3391		4.88452		7.23124
	6.50647	2.94169	3.14516	7.37329	2.06319	11.975	2.48362
2.74889	4.72174	3.44912	2.88473	10.3961		4.87428	7.81718
3.45816	4.12947	4.3476	4.96413	8.53842		8.38313	2.73136
2.48017	2.25023	3.95647	5.05113	5.39005	3.08584	7.18566	3.66594
5.01587	7.37845	13.6233	3.9402	6.57622	6.9497	9.10632
3.30028	6.26617	3.50305	1.41179	5.54988	1.93401	6.63309
1.73113	1.8517	4.66074	2.99491	10.9896	3.61488	8.44826	2.94214
1.63695	2.65077	4.50529	5.97564	4.23201	5.0931	7.5366	5.47321
3.85272	1.7951	6.4082	3.30403	3.92523	2.13046	5.28598
1.76596	1.99358	5.7327	1.73972	8.50902	6.56742	5.48922	2.93518
2.63696	3.59335	6.51824	2.06205	9.33771	1.83368		5.54938
2.58348	8.57339	15.4597	5.59776	4.1723	6.03511		4.08466
3.72417	5.12126	10.0826	2.80933	6.24031	8.86744	6.28995	2.54707
2.19766	5.55092	3.05141	5.22539	7.76965	3.16633	10.8372	3.47905
2.19963	2.79671	10.5319	5.66856	4.12662	1.91995	13.6799	2.96466
1.68756	4.06213	2.83364	2.59341	4.82568		4.76538	2.91273
5.04597	5.89461	11.3251	2.27004			7.22174	1.72009
2.99045	4.96718	4.66758	2.56602	7.79041	2.53851	14.8356	2.59011
	5.69064	4.7029	1.99742	8.77847	3.50513	4.26338	2.78529
3.95288	3.1882	8.0242		6.68958	3.24289	5.83948	2.75328
2.65791		9.20967	5.27061	8.14778	2.37134	6.77373	2.3308
	5.43767		3.00899		6.13015	6.12244	2.65
3.17858	2.54028	5.29031	3.38832		2.02236	8.87197	1.27143
4.16962	2.12796		4.87407	3.33092	6.6636		2.11752
6.28045		12.2801	2.54201	7.19255	2.25446	7.8271	5.27142
	3.06274		3.51774	12.121		6.25455	5.02269
2.92007	3.30112	4.97967	2.63281	7.67123	6.25694	5.38879	9.02003
2.19131	7.91948	3.45351	6.33218	9.22775	5.26297	11.9778	2.32162
	4.86401	6.68578	3.09364	9.02534	7.99824	4.73945	3.00706
7.33297	3.27718	4.49448	5.70801	5.60457	3.92118	6.49258
2.91843	2.6396	10.3205	2.30148	6.63673	6.91501	4.74309	2.41898
2.53925	3.13811	11.2529	3.58158	3.70259	8.53372	4.88096	3.94893
1.78528	6.5397	8.71491	3.04361	9.26794	2.8869		2.66116
1.79901	2.40817	6.62889	3.19651	4.03792	2.31161	15.2039	5.84403
1.22924	2.09367	15.8311	3.00091	7.40057	2.42472	4.19839	11.2148
3.4773	2.74823	11.4918	6.67033	9.08815		5.02149	2.16522
	2.7233	5.91628	3.11981		2.69325	10.5145
7.91194	5.89769	6.67906	7.50791	9.60831	1.8935	3.90727	2.84871
		14.9473	9.64508	9.96043		8.90165	2.76191
2.82306	4.88887	7.23342	2.8929		3.11141	13.6107	2.81177
2.80907	2.13687	3.50109	6.77869	5.45934	5.65657	3.37124	2.89892
2.35699	2.70468	7.29366	2.65927	11.8093	3.02061	6.45027	2.4943
2.122	3.73477	4.15292	2.44963		2.88052	3.44195	4.33737
	1.97919	9.26931	3.14299	7.58113		6.58951	4.01331
1.57444	2.76321		3.57542	3.95653	8.48266	3.85157	2.45467
3.00686	8.13461	15.1976	2.92939	6.36871	4.50121	3.24814
1.66235	4.93291	13.1811	10.0668		2.75308	2.99128	3.55181
1.83304	5.01234	6.69971	4.83521	9.61716	2.20038	3.7039	4.65099
7.4085	4.80939	3.85957		6.11052	2.99729	5.38684	3.0694
7.78226	3.88374			6.10541	4.89018		3.88957
3.14165	2.99675		5.47136	10.9403	3.05726	7.33134	9.24888
1.62675	2.75218	7.68073	2.75314		2.80195	4.38979	3.10073
3.08673	2.80757	3.69603	3.97549	9.00484	8.35689	6.75318	2.65556
1.97081		6.93494	3.22636	6.35838	4.42982	7.22326	9.44984
3.54998	3.01308	8.3032	2.19546	7.08577	3.9942	10.9373	1.5882
	8.29163	6.18385	2.79064		7.70786	4.33618	2.09637
	1.55849	5.28931	3.78902	7.85233	5.0481	11.4827	3.5309
	3.97267	7.21101	3.31031	8.17915	5.20557	6.94796	7.93802
1.46037	2.37366	12.0232	4.22205	6.62975	6.82084		2.22924
2.31985	1.83889		3.31478	3.51218	7.12981	3.32581
	1.71814	6.88196	2.20684	3.30676		8.09245	5.58638
		10.3881	4.84267	3.87775	1.85189	5.21173	3.62175
6.93144	2.38501	2.46965	3.87581	12.0496	3.39534		3.29135
	4.50369	7.83569	4.14052	4.32184	1.88966		11.2243
	3.59723	3.04465	3.92437	6.66064	2.68541	7.64603	2.08862
2.09669	4.1702	10.0909	3.25038	5.60078	5.29751	8.03305	2.22914
4.6379	3.136	11.8232	6.64124	6.34395	4.59691	7.38562
3.58416	1.82071	8.49464	3.20694	11.2574		8.12404	5.93709
2.82893	2.03749	9.75637	2.9946		7.01822	7.49217	8.3067
6.06322	2.93591	6.2251	3.27606	4.13632	7.54692	8.64409	10.0473
5.33887	3.35268	3.31245	2.27406	5.34088	4.59318		5.18294
1.79007		5.17575	8.19229	5.07861		8.09598	8.21924
		7.84164	8.71544	7.23825	2.70689	7.41364	2.42643
4.51006	2.64697		3.58589	12.4467	4.30775	11.4878	11.0145
5.34099	5.05928	8.88947	3.56049		4.16464	8.21317	8.04857
2.17687	2.23467	6.19164	2.35909	5.35272		5.52757	3.86927
6.06687	4.62822	5.93081	3.86848	4.75125	1.74166		2.34251
5.34514	4.56734		2.22833			7.26538	3.60046
	4.0965		2.73159	5.91653	2.02491	6.83359	8.38925
4.47295		8.63539	5.51051	9.10537	6.83276	14.8267	5.67189
1.36877	1.61308	4.61732	2.5322	3.38258	6.49427		1.88867
2.18156	6.1929	7.58369	4.00188	4.12669		5.17906	2.2094
2.21033	3.11739	6.41035	6.54282	9.16948	8.89523		2.21539
5.61029	7.78893	8.48728	3.62735	4.17115
2.25743	2.16011	8.84842	5.22421	3.79022	8.07868	8.9963	4.02556
1.65879	4.21825	7.82925	9.81833	2.54123		5.45483	3.9157
2.03181	2.96017	6.46055	5.04498	4.17156	5.34337	4.86935	7.04665
1.58488	3.80482			4.9332		3.48734	4.11981
1.88763	2.27667	3.71572	2.68547	12.105	2.914	5.09185	4.14278
2.84294	3.73465	4.76923		10.5345	5.38179
2.9004	5.42258	5.43486	2.7872	6.16815	4.76799	3.49452	5.69788
		6.82595		3.98095	1.43238	5.12359	3.05181
3.4583	2.19394	6.28799	7.63303	8.09556	1.95185	3.47754	5.82504
	1.67987	4.61797	6.24545	7.36039	8.24309	6.74568	2.82885
3.46132	2.58678	8.27267	4.35273	7.89796	2.18789		3.19689
	3.26559	5.38764	7.88612	4.49088	3.24478	5.78886
1.98877	8.1864		2.03563	3.83524	6.66475	6.63796	2.48251
2.769	3.12244	4.40839		6.50978	2.67994	4.13001	2.53914
3.47811	2.94006	5.11876	4.0724		6.80782	9.72584
	1.72131		9.09113	3.83441	2.12701	7.79824	5.66098
	6.3029	5.95437	3.11564				2.56865
2.27702	2.31343	3.21826	7.56374	6.72705		3.91363	4.49123
6.8006	3.2787	6.60929	1.7831	10.947		7.08974
4.71484	1.93571	5.52404	9.25871	5.1034	5.99865	7.55217	1.69903
3.89163	1.71735	6.19773	7.70148	6.38814	3.64694	5.45457	2.78256
3.46474	3.05443	8.903	3.23325	7.85547	6.59304	10.8267	6.22874
1.55089	1.89674	10.5819	2.27969	3.70578	3.82919	8.40641	5.16614
3.22607			4.44406	6.12057	5.30036		1.98579
2.93066	6.66043	5.0928		3.86709	2.35611	13.3005	5.59364
2.86847	6.67743	2.85945		6.15752	3.10585	4.40069	6.14636
	2.02976	4.24979	3.206				3.14145
2.76831	2.34718	5.23373	3.13495	4.93221	7.5817
3.2901	4.50488	5.77399	5.89719	4.13947	5.78561	11.2605	3.84274
5.70016	2.22927	4.75795	9.59395	6.11008	3.63636	2.6967
2.51779	1.88332	3.42809	3.01244	5.02406	8.85955	2.80758	3.36206
4.27432	7.70132	12.8469	3.18056	6.18059			3.08373
1.63174	7.37138	4.69376	6.04457	3.82489	4.94319	5.1017	2.12173
2.99376	1.94518	6.19316	3.53986	5.15307		4.88729	5.08786
6.54416	3.04121	3.28277	3.3146	7.85981	7.17142	7.83691
2.98259	2.95992		3.46651	8.70702	2.9427	7.2282	3.52878
1.78348		3.89523		4.73627	5.08294	10.1926	9.54149
4.59488	4.92671	3.87659	3.93287	8.01541		6.89556	4.45164
1.50926	3.92984	6.24872	3.66566	3.46577		8.73592	2.20683
5.40282	4.22672	9.2625	6.77197	9.80697	3.79861		2.04501
	1.68187	5.51376	3.34753	4.54198	1.9253	12.621	3.24762
7.43776	2.14295	2.93354	2.87862	8.21517	2.62621	13.4798	2.91259
1.9655	3.97711	2.92544		5.77237	3.12445	6.95632	3.62679
3.09444	5.11252	2.76401			2.06622	6.39445	7.7616
2.192	5.92635	4.3628	3.91457	3.15281		7.38662
2.80559	1.72501	5.8595	2.88879		2.33783	6.67136	2.30816
1.5145	4.22701	2.70466		5.2424	4.33137	4.52855	1.94211
		9.94571	2.48233	6.66059	2.86043
2.40431	4.47758	10.7874	2.96591		6.43741	9.26849
2.79984	3.23837	5.25504	6.73926	3.77176	2.10731	2.87381
1.71043	2.50969		2.08093	5.7562		4.43229	2.57883
2.47646	2.58266		1.65			5.13484	5.79836
	2.54344		2.6907		3.58305	9.16478
5.4429	2.16139	12.347	7.45172		3.30626
	1.92064		5.61221	5.18698	9.15497	15.1891
2.30226	2.63305	6.80651	4.166	9.03329	2.84688	4.24727	2.1001
2.68335	6.48569	9.99568		7.43685	3.29086	8.28419	11.0619
2.07248	2.90987		7.23384		4.41509	11.4392	1.68341
4.20988	2.12239	5.96796	2.46455	7.37157	4.26304	4.09823	5.12037
3.06171	3.80846	8.7211		3.57639			2.21535
2.03248	2.54597	5.75883	4.22475	4.54737	1.66209	4.0694	6.82249
2.86075	1.72066	3.09943	4.84499	8.84947	4.60452	4.2998	2.71585
2.58859		2.94052	6.42241		2.15155		1.97568
2.47198		3.58154	6.98639		3.55693	2.63831	3.6916
2.73791	2.05911	8.228	1.88561	9.99608	1.72452
3.18352	2.163	4.10439	8.39867	7.55547	3.35074		4.23187
2.50751	1.69058	5.58828	1.81445	9.8556	1.55721	3.14924	1.98187
3.19879	2.78682	6.72711	3.23839	5.04589		6.01486	5.15851
3.41519	2.2383	15.3388		5.04911	2.20995	2.70627	2.12051
2.46947	2.04949	7.14815		4.66232	2.32645	6.71567	9.51408
5.08961	3.84887			3.87082	2.09586	4.34294	11.225
2.07903	4.79439		1.90799	8.66447	6.91623	4.61894	4.79309
1.63875			2.05539		6.60321	4.73344
	8.09824	10.8647	6.64195	5.81516	2.25211	6.80679	1.70854
1.81897	2.47808		2.52766	6.12399	6.00078	3.5452	2.30903
4.31033	2.00445		2.99588	4.77307	3.72174	3.56787	7.76001
2.57756	3.31172		1.86764	6.70726	1.8189	4.69899	3.69157
3.73961	3.69393	13.6977	3.3941	7.99415	1.45333	3.12204	2.39742
1.52012			1.93261	4.54844		4.33026	3.45195
7.1738	2.03722	15.658	2.31735	4.44565		9.49733	2.51491
2.18066	2.23706	14.5444			1.71049	4.28598	3.32215
2.48588	2.23206	6.51513		4.94871	1.63258	4.24043	2.99202
1.97997	3.7145		3.01689	2.44216	1.48274	2.36973
1.94662	2.96489	6.51389	4.82692	2.46714	4.2713		9.98883
7.61915	3.15573	7.22598	2.30191		3.6602	8.16936	2.96855
	1.62213	9.67712	3.02923		5.10628	7.83754
1.89232		9.37114	4.3996	3.02615	2.75333	7.46526	3.54866
	3.77768	4.47593		3.87949	7.23779	7.67897	2.21988
3.45944	2.91767	4.97608	1.60117	10.9214		5.85475	2.58843
2.83695	2.72762		2.7805	7.26435	4.07956	8.61205	3.60421
2.08691	2.55381	5.02655	2.64368	5.92688	4.35222	2.9088	3.26665
1.63565	7.42329	2.66549	2.50303	8.40793	2.72528	6.92015	2.35923
1.4864		7.44371	3.90405	6.04905	1.678	3.25223	6.62408
		11.8643	2.99489	6.3531	2.77306	4.47269	1.74233
4.38474	3.11696	5.14795		3.07718	1.66882	7.20806	4.19646
2.15638	2.4772	3.8733		11.4316	2.54527		3.46439
1.55911	3.97247	4.67057	3.50026	7.73985	1.87216	5.94998	2.16747
6.23141	1.89266	10.4179	3.69313	7.25506	3.341	4.28984	3.06277
1.8022	2.41695	7.91471	2.32511	3.93185	1.99386		8.28207
	3.01672	6.64667	1.79858	5.2163	4.14055	14.1357	1.95844
1.60905	1.88405	5.28909	2.36002	3.00368		4.29941	6.11491
2.92505	1.92342	6.43036	2.65897	13.0485	6.20575	13.8667	3.59982
3.33107	6.93792	6.13974	3.97734	2.96614		4.92007	2.86548
5.58751	1.85972	4.80877	3.28441	2.71705		8.77597
1.38362		6.70781	1.61102		3.6991	5.49895
4.64272	2.24526	8.24543	1.77106	6.58369	2.09175	5.05069	3.36018
4.57269	1.82649	12.0342	2.02132	3.67638	1.85755	3.93562	2.83105
2.45386	8.95526	6.6127		5.7617	2.23698	3.14761	7.75323
1.65622	3.44273		3.95321	10.4742	2.57846	2.0738	3.19849
1.67746		7.43122	5.67511	7.9762	2.5166	5.29643	9.40663
1.95664	3.31586	12.637	3.72561	7.92812	1.61763	5.46602	2.42376
2.76101	4.31915	6.21114	2.64695		4.59944	2.9926	2.17148
3.35612	8.75719	6.27964	3.21691	9.20388	6.22821	5.19257	4.49162
2.16423	1.62693	5.54576	4.295		5.38834	4.45351	1.75998
3.6042		8.75594	1.68752	10.2626	1.93164	8.21066	4.27721
4.42696	2.56715	8.4015		5.45856	2.08845	4.68582	1.51031
2.4662	2.16267		4.17399	11.3525		4.67426	2.342
2.10986	1.74838	7.20475	3.59068	11.5393	2.32787	5.63527	4.79148
	7.89645		3.1171		3.08328	12.13	1.35929
3.63121	3.96304	2.61916	3.52705			2.58672
2.68995	3.09066	5.98288	3.6661	6.11895	2.29936	2.76849	2.22838
	2.01833	3.5513	6.35366	7.77534	1.7551	5.74202	3.50609
4.54871		2.7924	3.23016	5.56746	2.99429	5.35304	8.1497
		3.41251	4.23476	9.71075	1.81254	4.90408	2.75645
2.58347	2.47145	4.37466	3.59944		2.03511	4.02119	3.6402
2.70699	2.54576	4.15961	3.21176	3.86868	2.11196	5.03949	9.26219
	1.79378	2.89582	1.95311	5.58944	2.06535	4.23338	2.2146
1.19332	6.82687	2.44325	2.93892	3.9596		6.92053	2.53022
3.14571	2.27851	2.78987	4.02941	3.51458	2.10452	3.26517	2.50517
	4.26952	2.18922	1.8068	3.62161	3.65622	5.03924	3.9445
5.03173	2.54994	2.34646	3.26693	7.67451		3.6837	3.45863
4.65606	5.23054	4.31704	4.78891	9.38961	2.23901
2.11683	3.14143	2.89025	3.01409		3.93578	2.54695	2.57297
	3.01009	3.23173	3.4648	3.92447	1.96455	11.2932	4.22014
2.1598	4.66248	2.51856	5.686	4.97206	5.34822	5.28491
2.00286		3.03549	3.90808	8.49107		3.9008
2.70641	7.46454	4.72326		4.98198		6.58093
	1.95913	3.06638	1.99407	9.15046	2.05114	3.62221	3.63582
5.27605	5.34164	3.81206	6.00258			6.15223
5.43921		3.22972	8.28224		1.45079	13.3624	1.98276
2.30103	6.45074	2.88218	3.09352	12.5997	5.32182	4.13631	7.6588
1.73872	3.17943	5.0039	3.30671	5.14381	4.06738	6.54889	6.57975
3.65845	3.68366	2.60173	2.57219	7.99671	2.33616	6.7448
2.58559		11.9758	3.9776		1.51178	6.8317	4.15335
	6.22486	3.41412	3.19133		3.6684	7.59834	3.4917
	2.10174	4.27882	4.14302	5.49906	2.74628	6.83327	4.63784
3.43723	4.60018	6.92902	3.06488	2.86777	2.0787	4.39922
2.02989	5.71087	6.14336	2.83531	2.73288	2.16989	7.08716	2.65895
2.90006	2.75848	9.44759	2.43859	3.52864	7.48116	3.74862
4.2229	2.85272	3.03331		5.02333		6.18292	3.66712
1.98093	2.4412	3.75853	3.38248	5.03322	6.36118	10.5105	7.59983
1.88545	2.17384	4.74409		3.59771	6.56454	4.81223	3.30286
3.08148	4.18127	8.07365	6.07612	4.70059	3.60051	7.54333	2.48323
3.32808	1.77259	5.2101		2.90067	2.45157	3.42957	4.99568
2.57224	2.20296	5.19205	3.93095	5.58382	3.22252	3.42257
1.72663	3.77754	4.35696	3.41558	3.97586	2.81317	9.43935	1.89979
2.17907	5.39565	2.90136	4.01316	2.26668	2.86351	3.70636	2.2285
1.4365	3.71906	6.60402	4.73478	8.07515		3.78165	5.91585
3.42137	3.99502	2.76682	5.5386	2.8961	1.95313	2.53069
2.59759	3.24389	4.22523		2.28593	2.05429	4.20757	3.22147
2.23051	2.68382	8.64432		4.07671		9.73705	3.61227
3.31327	3.02425	4.46041	1.99591	5.34004	2.76538		3.8094
2.34882	2.36431	4.65855	3.47502	3.16742	1.868	4.24883	7.30552
3.21386	3.19012	7.26054		5.9847	5.72659	6.01282	3.59256
1.61921	8.34764	7.65515	3.31832	3.19325		4.89201	3.75533
1.88921		3.59574	3.07029	2.66057		8.5519	3.31765
2.14781	7.97233	10.8961	2.75578			5.46023	9.3629
4.75212	2.2793	4.2988	4.0814		8.02255
1.5282	2.72229	2.97911		2.70794	2.106	9.44611	6.5524
6.93205	3.84242	2.61165	9.10458	2.54784	5.06363	8.43463	4.43913
		2.21294	4.24509		8.6375	8.53546	10.7814
6.272	3.45876	14.1999		2.52817	6.17528	3.69151	3.2292
	2.56741	3.80507	3.74036	3.39615	3.0518	9.31428	5.11208
2.50772	4.92324	10.8306	4.96972	6.19861	2.2718	7.28915	9.15834
2.4848	8.02463	6.44871	3.53977	4.37436	1.56956	8.53741
2.54105	2.29385	4.82907	8.3572	3.18886	2.29386	6.09175	4.72013
		5.97588	3.39699	4.77722	3.63177	13.1057	5.4534
	3.31701		3.14564	5.27637		2.56265	4.30418
2.70979	2.3569	3.97679	2.53204	3.40701	6.98955	5.09496	2.45949
1.96796	1.85219	5.29587	6.52767	2.63815	6.36671	2.81758	5.55396
5.49516	2.8864	12.8392	8.53192	6.2298	3.25194	4.14369	8.07949
2.11388	1.77568		3.01937		2.18216	7.90463
1.44566	3.33064	2.77968	3.02198	3.83908	1.839	2.59444
5.94928	5.51477	4.53668	3.06266	4.44012	3.89041	2.99313
4.63158		2.94037	2.69937		4.82372	2.3302	2.1094
4.59164	6.39046	7.10474	3.03023	3.45203	1.68262	4.6136	3.90555
2.55833	3.77909	13.134		6.30154	3.55702	4.02347
2.80849		5.80913		2.75652	2.02877	4.33719	5.41974
1.84804	4.63668	5.18733	2.98468	6.87184		5.4926	3.82514
5.78198	7.7917	4.26569	3.48433	4.29915	7.67708	7.90527
4.27039	1.96561	5.86526	2.10097	3.13605	1.67911	5.33568
	1.96179	2.83073	3.80835		4.51804	3.58492	5.0089
	2.66827	3.41183	2.64322	5.0822		8.21016	2.96684
3.479	3.46613	5.03874	2.99089	4.82243	8.81233	7.27298	3.3484
4.51756		6.11914	2.79864	6.61291	6.26004	3.77258	4.01817
4.0743	4.65506	5.10886	2.17935		1.70346	5.27119	2.65471
4.12927	6.04666	2.58058	3.31235	10.186	5.32801		3.03535
4.80101		6.1076	2.36864	4.43356	2.83165	14.3389	2.2607
6.62513		7.51381	2.1893	4.10313	4.64981	4.40005	9.3047
2.04527	3.02648	7.56162	1.98483	4.06519	3.11653	3.48239	11.2723
	1.88905	5.68825	6.48343	9.43419	2.05595	6.47064	2.60561
2.70531	5.08659	8.13004	5.01564	7.13247	3.78355	6.21373	6.65851
4.68057	3.12863	1.69347	3.21782	2.06379	2.40752	2.75401
3.29642	2.00879	2.26575	2.0264	3.82484		6.00615
3.16655	3.65932	2.10802	3.95361	2.66548	6.56335	3.66037	5.39194
2.74834	2.40752	3.26228	3.55846	9.83964	3.36745	5.9257	1.98878
3.08733	2.66753	6.16806	1.8514	5.65724	3.89824	14.0514	2.48491
3.61431	2.32875	6.88512	2.5177		4.5034	9.07005
3.11237	2.77881	9.47681	7.58252		6.77576	9.57048	2.27931
4.35964	2.22078	5.53349	3.37068	3.4366	3.15169	11.6205	1.97728
3.64262	3.55928	7.19597	2.31736	3.9852	2.0089	3.6193	2.96956
3.76928		2.78331	3.27779	5.96903		3.02168	6.69003
3.56821	4.43748	4.80669	4.08322	5.80525		9.13901	6.25922
2.2395	2.87556	11.7707	3.58958	2.75452	2.01313	11.5325	7.17142
3.3127	2.06248	2.2326	3.69968	7.6407	1.5092	3.37348
1.99779	2.2808	1.87561		9.5773		3.88261	5.04045
5.06964	5.0567	6.62088	3.56481		3.39483	3.26178	4.12698
3.14716		1.77785	7.74902	7.55647	1.55643	4.86359	4.04001
4.63906	1.9653	2.09715	2.37741	5.84379	2.83541	4.59538	2.59355
2.53208	1.97543	8.0363	2.7674	4.28281	3.73698	6.13541	4.71425
4.21842		13.403	2.01571	2.02728	1.62182	7.57838
3.02812		4.27814	8.52164	2.87117	2.75664	6.5642	3.55322
3.69633	3.85178	8.25092	2.17226	12.8328	2.68108	8.55999	7.14038
7.08565	3.12376	2.72445	3.35503		4.01888	2.86882	2.82184
4.335	2.91867	6.21132	2.80054	4.33577	2.39648	13.5216	6.34879
4.21564	8.64294	3.14201	2.71551	6.40399	2.4524	5.37378	4.48065
3.98207	5.85853	9.45954	3.6999	3.06804	3.57321	8.99733	4.87244
3.47443	6.99644	2.96449	1.97099	7.85433	3.40572	2.4407	2.70074
5.39343	4.17669	3.30302	4.60855	3.30316	4.1871	2.99687	6.38577
6.43031		3.05392	3.28592		1.33728	7.49261	9.80792
2.22624	4.0215	7.46048	3.08212			4.04739
3.01497	1.93409		5.84354	3.79308		3.50722	9.40274
5.82991	8.78104		2.04843		2.40052	6.31385	4.35988
5.00981	4.67113	8.34999		5.68466	3.01438	2.50481
6.21159	2.20265	8.38898	7.23087		1.85664	6.02763	4.88069
2.6165	2.6744	3.72302	4.01289	5.60423		3.56529	2.37772
	4.80101	5.94507	3.4895	4.54675	9.18082	12.4299	3.91486
2.8389		3.79591	6.3588	6.47858	1.99124	6.04987	6.80733
		3.32941	5.09337	5.45493	2.97002		2.5403
4.71523	1.91104		2.5971	3.07323	1.7341	4.4921
4.59677	2.60476	4.48817	8.52756	7.52457	1.80202	4.29015
3.24336		7.363	3.18976	8.55019	3.92762	3.37569
3.77045		4.68779	5.3777	5.19789	4.35352	6.29932	5.24959
	6.52673	10.44	3.89493	4.89078		2.81032	2.93074
2.84161	3.78124	5.38096	2.80877	2.20393	2.1471	11.3894	4.84412
5.00845	3.84854	2.33357	2.69544	6.50189	2.49551	4.46029	11.1781
6.20683	4.85263	2.31662	4.03636	3.4975	1.79629	6.75514	4.03934
2.19005	5.28098	2.624	7.13139			11.3685	2.84924
	3.47277	5.13557	2.31141	2.41284		3.99255	9.38188
7.94016	4.1782		3.56874	11.796	4.56177	3.57805	2.26106
3.91777	4.71134	5.13424	4.34355		4.85519	4.04774	3.47995
4.19252	2.93778	6.75121		2.10363	3.24716	4.13599	3.74148
3.91574	7.79704	6.00568	8.35651	3.80934	2.5379	4.89387
5.31468	3.43326	4.22575	1.7071		2.7367	8.60903
6.61617	2.76666	2.87936	2.08824	12.8512	3.69012	3.04485	5.30401
	3.27758	3.03649	4.15698	3.39331	2.30046	4.04618	2.621
3.06804	2.51627	2.97025	2.18476	10.3445	3.94377	12.7904	2.75992
5.38834	2.43651	8.28558			4.46332		3.076
5.07899	1.92674	2.46123	4.30539	8.71757	3.19273	7.39087	11.3187
2.31457	4.47755	5.16039	5.84369	8.42709	6.07635		3.34936
4.49541	2.44654	2.76614	7.07909	10.8551	2.20402	3.92782	8.08076
7.76659		9.99309	5.74207	5.29555	2.04122	5.79546	4.719
2.58734	2.14758	4.30051	2.40576	9.08739	3.76843	9.07745	2.41945
3.41878	2.20346	2.01136	3.073		2.23824	10.8763	2.05817
4.41685	3.74238	9.60039		5.42395	2.34761	10.0485	7.27214
2.47688	4.55226	4.92031	6.34113	4.98072	3.55136	7.76441	6.56137
7.72065	5.59773	4.06442	1.59898	9.29987	3.03477	8.46454	2.30505
3.43378	4.59583	3.31618	4.50323	6.29369		7.7534
2.24507		4.90493	5.10165	5.24724	2.63347	9.42763	3.30589
6.53255	5.10674	11.0986	5.56448	6.6554	2.25595		3.53256
3.68013	6.21447	2.95868	2.12842	6.36713		7.65372	5.17973
	1.86819	4.80345	3.20149	5.8488	3.34151	5.23398	4.91906
4.86008	6.37399	4.22823	3.15219	9.42783	3.37038	2.84104	3.53305
	1.9993	3.04993	4.69743	11.3667	4.88498	3.78926	1.76559
4.37703	2.94955	2.19911	3.45802	4.84074	2.95139
2.21623	3.80873	7.68709	3.84093	6.63199	3.16382	3.3507	2.24352
4.52659	2.58146	3.18713	5.29782	5.50661	6.47459	4.54794	4.55117
7.7378	2.70015	9.52318	7.16519	4.10661	2.64971	2.75613	1.76718
2.53932	2.78033	7.19774	3.09556	5.9085	2.9668	5.87862	2.20673
2.61916	6.18798	7.35338	3.45227	5.73568	2.02164	6.49972	1.83718
4.55507	2.40658	4.10522	2.13544	6.67807	8.26855	4.76595	2.74406
4.32193	2.99338	5.97173	2.162	8.97602	7.68606		7.68379
4.1008	1.69331	5.68377	2.56569	9.917		7.07923	3.64644
	4.17143	11.8911	1.95326	6.0867	3.05446	3.61598	2.51163
1.95998	2.05216	12.1271	1.97797	6.7385	2.45	7.18892	5.97868
6.41526	3.76573	3.452	1.79325	5.77575	5.59037	2.8823	4.49434
	4.49312		1.92633	6.06113	1.51848	3.63058	3.95882
4.90407		4.32951		5.76149	2.06407	6.53567	1.7233
2.83447	4.01843	4.72153	4.42803	10.5664	2.76996	13.1149	3.49046
2.27618	1.96241	5.14586	2.65776	5.30297	4.05592	4.85704	3.94179
4.6078	4.0248	10.5695	1.92062	5.9247	2.02008	3.59808	3.29916
2.81262	3.15653	3.16597	2.2368	5.0134	2.53628	11.6477	5.18337
4.05645	5.09546			6.12828	7.0157	4.86583	3.84685
3.82448	2.00974	2.00899	6.23645	5.6697	4.02231	4.63646	2.53047
2.74736	5.36812	3.10068	3.04133	6.40576	3.25772	7.58768	2.65826
2.3844	4.84804	9.37328	4.80185	5.62978	3.72384	11.664	3.49243
2.58701	3.1646	15.8951	6.07447	5.49198	3.40071	7.30779	2.60038
	4.63292	15.6502	2.56397	9.57962	1.65077	7.75342	7.12347
2.71507	3.02702	5.97198	1.90157	4.99218	5.48569		1.81312
4.89056	3.3712	6.81627		6.60425	5.45545	6.57133	5.16473
	2.77069	3.19153	5.52631	7.09074	2.16057	3.57854	1.9673
2.54803	2.5147	3.83057	5.59891	5.63635	4.58663		6.3422
	2.40343	3.6147		6.15036	8.80325	11.3339	2.45176
1.67247	2.51208	3.07132	3.81805	6.34505		3.97121	4.57068
3.15784	2.65446	4.18433	1.95325	6.975	3.5762	8.97231	1.8684
2.87778	2.30577	10.1117	2.55347	4.56115	2.46953	5.36788	3.69458
3.84355	3.15167	7.75861	1.79886	4.85228	2.16431	8.82114	3.23344
2.93857	3.00948	7.20112	8.46739	5.13798	2.46825	4.05833	3.73561
4.99777	2.42906	6.25287		12.6755	4.92162
1.74034	3.08457	11.7271		4.88616	1.46835	6.64404	1.88562
	2.57869	7.25166	1.73299	11.8099	2.03913	5.8387	4.4279
2.77181	1.87784	12.5815	2.17955	4.9088		9.03783	5.89906
2.90549	3.3399	5.33864	1.61614	4.79731	3.10806	5.15341	4.74409
	2.95871	9.4003	2.77999	4.14341	9.38473	2.25623	3.03042
2.3728		6.81646	2.10039	5.80352	3.49421	6.32249
2.33661	4.61273	5.03886	3.45725	8.00138	2.2206	12.2735	5.35171
	9.14208	5.16292	4.29088	4.83484		6.54752
4.01953	7.85939	4.27521		5.06674	4.31086	13.5244	6.18568
2.56624	5.25078	10.1332	2.33094	4.87112	5.29563	5.19755	2.04227
	6.83714	9.98988		5.41848	4.73055	4.16547	5.93599
4.2851	8.672	4.66213	9.41492	3.95814	2.03931	8.11875	5.43218
	3.04878	5.8481		3.84184	5.64869	7.72573	8.94095
5.27733	2.92696	5.01643	2.60191	5.32919		2.40967	2.74202
5.65468	1.63852	9.36644		5.81253	4.31125	3.28856	6.97046
3.6071	5.25114	5.56931	7.82095	7.01502	3.89068	8.6113	2.4475
	5.13731	7.45355	1.73566	5.58355	3.30431	7.59505	2.12578
5.46574	3.95602	2.45627	5.76108	4.89941		2.71729	1.9683
3.7941	8.94106		2.25255	4.43445	3.76036	5.59914	3.8605
4.10002	4.73319	9.36511		5.58456	2.72511	4.66843	7.15339
4.46658	3.414	3.63018	2.07377	5.51931	2.66623	8.70545	1.44052
3.41162	3.89992	5.94513		4.96743		5.81996	4.49037
3.42532	2.48178	2.33038	4.25445	6.9624	1.79216	6.51015	8.15954
2.50616	2.74199	2.97608	4.41123	5.19307	8.48489	12.0684	1.98246
5.52567	1.6637	6.23289	1.7052	5.32597		3.39053	2.70782
2.23825	6.75468			5.78883	3.4694		6.19855
2.00294	4.2471	3.09143	2.89827	5.01965		3.77779	8.7277
4.8571			2.46887	5.96248		3.44822	9.25624
3.45468	5.94136	4.20014	3.32418	4.45551		3.59733	4.11825
4.08026	2.18029	5.11471	5.51051	5.58784	2.02368	4.4052
3.3271	5.80675	5.89135	3.28035	6.39143	3.4699	6.74888	5.43606
1.72298	6.68646	13.8999		5.54417	1.62247	5.05556	3.05956
6.02848	6.57093	7.45577	8.70319	5.48596	2.62098	5.41781	2.57875
	2.50471	6.72437	3.16028	7.32739	2.60385	6.44817	3.25019
	1.88299	4.83836	4.69118	9.91904	1.86111	10.3282
	2.03236	2.74743	4.21109	5.05802	3.10727	5.78637	5.21494
2.19129	4.39941	3.88853	7.30431	5.25926	1.74784	10.9153
2.54299		2.16187	3.20419	9.62682	5.11859	3.83463	2.16632
2.4996		2.62919	1.9621	5.42645	1.54368	11.6038	3.62715
4.5581	2.97135	14.3017		6.76673	2.7625	6.97297	3.9605
3.13	4.45361	3.39921	2.14102	4.74558	2.61181		4.61831
2.01237	3.47128	7.04199	9.02659	5.09969	1.65189	9.86625	1.59212
7.57494	1.80675	2.30038		8.2258	2.83113	5.11337	7.40077
2.89943	8.29688	4.51477	3.71213	4.44323	2.4261	3.75753	8.24595
4.25174	3.27	2.86573	5.20842	6.14745	2.36913		3.23197
2.38573	1.87472	2.77743	6.22284	6.69331	1.77419	3.7302	6.91467
4.31655	4.35181	7.92762	2.40469	4.41892	7.32164		7.34423
4.00616	6.84581	5.36815	4.58543	5.78797	1.36932	11.8701
	2.1965	2.22178	4.65482	5.54581		4.29866
3.22414	2.08062	3.33448	2.73378	5.68909	4.9953	6.22538	3.36479
2.35569	2.99056	2.61206	7.5292	10.9622	1.60978	4.57812	1.73238
3.1781	4.62862	2.06554		6.18915	2.34507	8.43499
4.33537	1.43677	5.45809	6.65239	5.05949	5.67746	6.57841	8.1227
4.18176	1.92412	6.06575	5.97186			6.25084	11.1376
3.94785		5.37198	6.26081	4.51681	4.03009	4.58253	1.84764
3.42067	5.32098	7.8084	2.65569	5.55182	4.99626	4.80196	5.17174
3.84657	8.14819	3.11624		6.09247		4.99518
3.1448	3.37498	2.5431		5.14347	3.34229	10.7983
	4.41159	14.9668	6.7435	3.82823	7.82453	3.87765	4.67606
4.09897	3.37009	13.6402	1.45208	5.35751	1.778	5.49373
1.51759	4.82376	3.06681	7.14515	5.20439	8.27446	5.33454	8.47632
6.83307			3.30205	4.59067	1.46097	12.1903
2.24673	2.0185	8.77717	2.62072	4.85756	4.85654
2.57593		3.05034	8.17877	4.32456			4.60527
6.76498	7.62897	3.25378	6.44817	4.75036	6.74976	3.79588
4.28436	2.68834	11.829	4.60025	5.27384	2.58823	2.69525
3.1896		13.8956	6.5249	3.96321	8.08521	3.89136
4.95024	2.1148		5.67529	5.72591	8.94205	3.05113	7.67348
4.03999	2.71907	2.30478	2.47318	5.01636	8.6376	4.23101	5.28031
2.13084	1.75121	15.9406	1.64377	4.43309		3.56824	2.09387
1.79816	3.6107	2.80374	3.84535	6.2013	1.45275	3.77553
7.30858	3.89981	8.95593	2.71642	5.39444	4.28986	4.45312	1.5832
1.97928	2.75394	2.17258	2.80237	5.34852	3.86011	2.95663
3.35338	3.31643	8.50387		4.2308	1.79933	3.5921
4.53544	1.78998	4.32906	2.91299	9.54865	4.45206	5.77913	2.07583
3.01834	3.94431		5.12984	6.01793		3.43102
7.30746	6.80366	3.31416	2.25253	5.16274	2.53164	6.13037	5.65027
5.60474	6.25417	9.58511		4.95358	1.803	2.97589
6.42368	3.42487	4.56802	3.65382	5.55756	4.8204	6.49377
4.24021	2.0724	13.3346	7.17104	5.02861	2.40731	4.18329	3.31625
	2.2119	5.2031	2.34711	5.76624		2.69162	2.26912
4.18117	3.64417		4.50506	9.19573	2.74261	5.02742	2.33317
	2.30546	4.64332	4.79083	4.80701	4.18393	4.56201	4.36617
3.92032	5.63264	10.6357	4.49068	12.9441	6.92806	7.00352	4.62038
2.40826	4.71938	8.6598	3.09897	4.48567	1.93792	11.3898	1.76834
3.49492	3.38237	11.0355	4.37698	5.42526	4.49269	3.55535	2.69387
4.37648	4.43581	2.83582	7.00303	5.18361	1.50301	5.82944
	4.36469	3.07676	3.35796	4.04977	2.12708	3.97319
1.93817	3.6584	2.34534	8.3764	3.62856	7.9628	7.82603	1.76255
1.76598	1.98122	12.213	3.97914	5.34479	1.56865	12.0229	2.84211
2.01141		3.929	1.99169	4.58204		4.6015	2.81914
3.49535	3.02883	13.1952	2.13026	7.97276	7.90035	4.98058	2.23517
6.55389	2.39471	6.8464		5.90977	8.53217	3.76634	2.14439
2.99315	2.15336	5.19005	4.60446	4.19106	2.09404	11.1456
2.9287	6.247	6.3038	3.97574	3.6554	1.68823	3.02702	3.89684
3.68619	2.41412	12.4219		5.2266		5.56767	1.60097
1.73357		10.6395	4.43478	4.51206	2.43452		3.1718
7.95453	1.87929	6.18028	3.21233	3.79929	2.25642	6.64513	2.18995
4.09407	2.33209	2.88437	2.64652	6.8665	3.65621		3.20917
2.87409	2.42234		8.38599	4.78195	7.67709	3.47224	5.539
1.72689	3.49157		6.73514	8.74907	2.88675	5.93929	5.21821
3.83186		6.12844	3.20904	5.5265	2.09912	7.69128	3.03576
1.87791	1.98864	6.48661	6.02461	4.38668		4.84777	7.69421
4.32713	2.67583	1.90512	4.29096	8.9463	2.93224	4.77443	4.21119
5.58498	5.80184	4.39439	2.82627	5.61897	2.92784	2.83117
3.36594		2.81413	7.68753	3.86136	3.26128	4.47141	6.51792
3.42872	2.41688	3.70667	1.7568	4.01357	5.02797	11.8812	4.24821
	2.68326	6.87498	2.47239	7.31723	2.67229	5.08438	1.94655
3.58303	4.11929	2.01731	2.04282	4.39594	2.27145	7.1691	6.21476
1.72858	2.37212	15.5309	2.13742	7.02641	4.18162	5.50812	2.49834
1.98523	2.12514	8.47368	4.37869	5.4882	2.99316	2.9203	2.96456
6.12344	7.82594	4.41783		5.47647	3.4049	7.80646	4.90495
1.9917	7.91852	4.70527	2.68671	11.2036	2.4926	6.21161
2.22552		5.50055	4.48338	5.00011	2.70357	5.47716	11.1292
5.47967	2.72961	8.38586	4.86699	4.79483	7.75731	10.3058	5.77468
2.2756	3.75471	2.11538	5.18229	5.62885	4.59367	9.26848
1.80519	3.758		3.25444	7.73727	4.18105	13.5518
2.15083	1.91908	13.8095	4.82957	4.84377	2.93956	3.32455	3.98449
2.83735	3.93987	2.31135	5.80028	6.72549	4.14687	6.15968
2.18409	4.74968	2.81038	5.30315	5.80724	3.76726		1.89049
2.09737	2.99207	6.79314	4.37927	6.38466	3.20912	4.98969	2.80813
6.19793	2.64301	1.78987	2.93007	5.12344	6.40581	4.37102	11.3106
2.26968	5.80041	2.98575	5.74778	5.40817	2.11356	5.30592	6.96901
2.33156	1.64399	3.28073	7.61524	6.50018	2.5725	7.68235	5.12167
1.72522	2.66913	3.79547	5.21872	5.89438	2.58408	3.13046
	5.48206	6.09247	3.34301	5.83028	4.1926	13.7531	3.90176
2.71327	7.54276	9.09219	3.64832	4.4312	1.91084	3.89854	2.31279
2.90891	2.49895	4.8269	4.11603	4.13581	5.32977	3.33643
3.32899	2.99685	2.43704	7.72522	6.07508	2.03253	3.17869
1.89637	2.60885	4.20779	5.48021	5.34603	6.49247		3.30392
1.73245	2.37934	15.8003	3.39544	6.40375	3.71821		10.7668
		6.13973	2.8773	11.9837	4.82055	4.9669	3.12143
		5.77991	7.07089	5.44515	4.22122	3.89852	2.91479
		8.58354	4.14896	6.40316	4.0082	8.24989	2.12995
7.30293	2.46849	4.0008		4.7162	3.1622	6.28279	4.12253
2.56662	2.57317	3.60194	2.59569	5.6737	2.56357	5.25338	3.18022
4.93768		8.3068	1.98069	4.46907	3.77707	14.1737
6.91031	4.74293	2.11722	2.87652	7.0607	2.51975	9.65994
3.71216	2.79165	3.36091	5.50507	4.90486	3.52345	5.76311	6.93493
	6.75265	3.96692	3.15644	4.1746		7.16859
2.57306	3.35248	7.42412		6.35581	2.39393	3.20979	4.45873
5.06992	3.8556	3.48693	2.54795	6.95693	2.45446	3.28668	4.99852
	1.88367	10.8151	1.82775	11.3899		3.03605	7.77539
	3.98762	3.79004		5.5493		4.21798	2.73682
2.51542	2.68407	2.65918		4.57097	2.40619	4.06879	3.16032
2.29344	2.33112	4.72603	4.20398	4.97925	4.40102	8.69453	5.24253
		13.5483		4.61885	2.33942	3.85954	2.73489
4.5383	4.11607	3.1395	2.89423	5.87276	5.80405	5.85026
5.63832	2.94614	3.85195	5.4848	4.78717	3.92529	10.8967
6.42987	1.93902	2.82961	3.10361	4.01889	2.6963	2.59462
	5.68516	2.4432	1.92072	6.17855		3.31166	3.5957
3.2067		4.68056	2.03558	5.77473	6.41991	4.69398	2.37804
4.84679	3.46605	7.80862	1.88014	5.56172	4.51497	14.4907	7.61589
6.66817		7.61846	1.89111	5.46123	3.52066	8.68318	2.82434
6.67889		6.0981	6.7908	10.743		5.18347	3.31136
3.98081		3.85888	1.88271	7.75178	4.37724	3.23118	4.88263
1.53545	4.31489	3.79968	2.99185	3.94793	8.89666	5.16238	3.43416
1.79087	5.42589	4.38146	3.31937	5.64509		13.9377	2.591
3.88787	3.27477	3.33762	2.98187	6.37486	3.21445	3.19247	3.44423
3.60487	5.99553	4.56516	9.6456	3.88465	3.22906	5.32227	2.58449
	2.06407	3.20733	1.98616	5.89589	4.01476	2.47764	7.05238
2.30224		2.36808	2.26582	3.8799	3.54834	11.4318	3.00795
	1.93409	2.75335	6.85698	5.193	8.87074	2.63501	6.5359
			5.54499	4.64432	4.55875	4.69012	2.82186
		2.4159	2.95772	10.7488	5.46219	5.48892	3.50005
3.35803	3.82001	10.875	4.35739		5.81873	3.95136	4.29267
2.24652	3.17512	4.75367	6.67538	5.53215	4.60749	7.98679	2.88306
2.11448	2.18208	2.23099		4.39946	3.54432	3.44118	2.8721
	2.20217	6.10082	5.70055	6.74047		8.6553	6.7505
2.01987	1.95455	2.52843	2.58052	6.13152	2.72925	3.85922
4.97995	4.10416	3.39709	1.82806	5.24871	4.02639	5.16714	3.06082
2.521	2.1822	3.12425		5.28175	5.37804	8.91719	3.65568
2.15613	1.84247	2.30038	4.67669	4.60826		3.17055	8.21106
4.34787		2.48882	3.28819	5.26087	3.51651	2.64934	1.91008
2.42236		4.60918	1.91434	5.38567	2.24142		4.85333
3.55698	3.33893	4.69488	3.34162	5.10346	4.06999	3.93904	7.40812
3.18091	3.42429	5.69545	2.32445	6.12926		3.18776	3.9743
3.0275	5.43208	2.50933	2.81131	5.84619	8.11374	11.3042	9.65695
5.06158	4.06119	5.54469	7.37509		6.32015	5.77621
4.07129	2.18465	8.28419	2.84355	6.05316	2.44329	3.18629	9.29211
4.58643		2.29293	2.78135	5.4106		11.1926	5.20107
6.44188		2.58478	6.0049	4.97868	4.0416	4.01054	5.03473
1.84607	5.47787			7.88326	6.28418	9.93139	5.3634
4.20978		10.506	3.09984	6.55236	2.95955	5.46995
4.48325	7.88174	2.12114		12.3867	5.05777	5.18881	8.16059
6.45206	2.75833	3.48012	2.613	5.62141	3.13461	8.83832	7.23579
4.48828	2.59398	4.11844	2.13785	5.83282	4.53907	10.0239	3.18517
1.66385	2.20072	6.48247	5.91112	6.3449	5.10719	5.00627	3.2283
4.53986	5.89812	8.43459	2.56046	5.39076			7.91422
3.72159				4.44501	2.68875	4.25227	3.40118
3.48959	2.401	3.92366	2.40549	3.97169	5.49617	11.7822	3.63702
6.31436		4.64386	1.83379	5.99843	1.93756	4.20232	9.68292
	3.8726	3.83812	3.08425	5.98175	1.71084	7.40755	2.5704
5.4838	3.48744	2.88668	1.81834	8.40393	6.39214	4.48391	3.29587
	2.11122		2.68623	4.54151	3.7588	9.07816	6.66978
4.17438	5.2422	6.50105	3.21645	9.16864	3.02483	3.07356	5.38972
2.79169	2.56316	2.20089	2.44379	5.64687	6.33566	7.12328	4.66986
2.86563	1.96288	2.54248	6.00133	5.3086	6.74637	6.18366	3.41017
3.84174		3.55893	2.16901	5.30931	5.41697		3.13953
	2.2341	2.87054	5.05003		2.41974		9.81731
1.91429	4.31725	3.68371		6.83683	2.42924	2.65185	5.56363
2.01266	2.09682	3.06985	2.2128	4.75466	2.095	8.29153
	5.27654	2.84481	3.45058	5.09167	2.16119	6.61857	1.98468
3.35243	1.82585	4.13018	4.255	6.66812	2.1323	3.00081	4.67278
2.46057	5.47188		3.04263	11.4475	4.35891	3.97994	6.84412
1.54659	6.87798	12.3742	1.93184	5.49043		9.71372	3.06699
3.44443	2.1953	2.11929	9.74501	5.61995	5.79001	3.39394
	1.91673	8.89275	3.17127	3.66324	2.19769		1.76625
1.80496	4.8479	3.24279	6.59224	8.84846	2.86237	5.03641	8.28296
4.60703	4.58295	3.51704	1.68404	4.70133	2.44742		3.30178
3.44221	2.84515	2.37364	2.61712	5.69072	6.00741	6.79519	2.23872
6.38651	4.63602	3.23002		5.00649	2.72678	5.87797	7.27222
4.25017	1.9486	5.98191	2.21458	5.86968	6.26682	13.9604	2.57146
1.91614	5.85241	4.36219	4.51057	5.70025	4.25677	7.76324
	1.49494	13.0828	4.36948	4.45022	1.56872	6.42383	7.94011
2.42297	2.12367	14.0184	8.78264	4.63306	3.06445	14.809
3.19556	4.82642	8.4771	3.85263	5.55127	2.33775	14.6019	7.82993
1.74967	6.13258	2.27336	2.92992	4.93355	4.65271	14.2621
	3.55916		5.05646	4.93779	4.02613		5.385
2.59338		3.07823	2.75783	12.3308	3.50172	4.65397	5.43845
5.82056	6.34765	2.507		4.76601	4.56695		6.37163
2.20362	3.06479	6.54006	2.75858	6.79156	4.15352		6.26735
4.55151		7.13547	5.77798	4.36261	4.64758		6.56976
1.66313	4.36607		4.634	5.92457	1.9252	7.43613	7.28152
	6.1468	2.58185	4.5008	5.75736	2.11159	15.0636	6.97162
4.45471	4.11709	2.26345	2.77747	5.33026	5.46634	5.27475	8.0918
3.90564	3.49651	4.17677	3.5575	4.42458	2.7187	5.89847	8.71094
	1.68656	6.93838	1.62298	4.5466	4.93996	14.2677	1.87834
2.62668	5.22622	2.85861	3.42068	5.656	8.39108	5.99893	5.72186
			7.14194	3.93257	6.57738	6.80499	6.52657
2.45137		3.83928	2.85725	7.76654	4.48328	14.7837	2.10233
2.24893	3.01561	9.19831		5.58163	3.48949	7.55072	2.04744
		2.97068		5.44727	2.29216	6.48524
1.85303	2.17568	1.93832	2.01402	5.92762	3.61456	4.9664	2.69064
3.31281		3.28571		8.58949	1.84187	6.65259	3.92798
6.15831	3.09181	2.67974	3.2339	5.11574	1.91069	3.18847	3.98439
1.62132		10.2827	3.64558	5.30006	7.06311	12.7781	7.82088
2.70328		2.65736	1.80968	4.97114	8.09276	3.3452	2.07972
2.38559	2.09911		2.47441	5.30175	2.95195	7.22293	3.33455
6.03543	5.78955	4.33762	5.46708	7.49205	2.61983	14.9321	3.19347
4.27147	5.25087	2.90621	2.86957	9.26467	6.08666	4.4147	8.07536
6.54243	2.64773	3.60236		4.95095	3.97263	5.3186	2.11894
2.26887	3.00776	2.70436		5.10769	4.22482	4.43336	1.72712
	1.92742	6.11252	3.98349	4.92285	2.27482	9.37779	7.62139
	2.19274	4.59213	1.81306	5.38139	4.38231	10.9444
	2.81766		9.83549	4.3496	3.05113	4.03454	5.99161
2.6487	2.05459	2.69551	9.77206	5.40542		12.0417
6.79823	2.12065	2.0235	7.95947	5.80466	3.72426	6.98019	5.41177
6.27625	3.81281	6.76102	2.84306	5.81456	1.78805	5.53864	2.50539
		2.60661	1.28971	7.17049	5.70099	5.22665	5.06795
3.86214	2.86211		7.22588	5.78897		6.2457	8.28036
2.76086				4.36994	2.28737	9.30214	2.61193
1.64308	2.20758	9.65961	6.23798	5.8705	6.78266	7.24464	4.18427
5.58501	2.80566	2.95584	2.17004	5.44716	2.33218	11.1414	2.65881
		7.07666	4.03215	6.54613	2.11831	10.3265	2.79245
2.66252	3.51364	4.80237		3.9929	4.14214	4.35167	1.82201
2.54382	2.00711	3.72923	2.99052	4.33894	6.28368	4.36961
	9.11237	3.73381	6.73215	6.54068	3.00349	3.78063	7.04823
	6.15597	3.11394	3.04968	6.64592	3.44147	11.3101	2.04269
3.83278	4.0921	3.88157	7.7898	8.77835	2.10122	9.67863	2.52443
2.44859	2.08426	8.46918	4.89965	3.88667	3.089	4.68416	2.01147
	4.77951	3.24022	5.81699	5.31671	3.93727	7.93483	1.87811
1.97321		3.29341		3.92246	2.14985	10.0798	2.59884
5.35924	3.12624	4.50053	1.45392	5.48618	2.98666	4.47128	2.16
2.84325		7.01889	2.37632	5.79544	2.13824	5.66618	9.57524
3.28522	2.18105	4.93791		4.59087	1.85613	6.33348	2.6786
5.3633	2.98367	5.63315	2.01785	4.61919	2.01711	8.45874	5.01112
2.3588			1.9241	4.73132	2.3273	3.21762	1.90559
5.4424		3.26593	2.07138	5.22133	2.51028	8.10245	9.30257
3.64676	2.91059	11.3227	2.09578	6.16599	5.17016	8.01151	5.8419
2.27076	3.21189	2.97635	2.58476	5.78327	1.86776	6.63754	7.56076
3.22847	3.03654	3.74109		7.34746	5.42605	4.5239	4.789
4.10219		4.41884	8.18404	8.11987	1.64378		6.8905
4.90408	3.04983	13.1573	9.51867	5.27027	3.09452		10.3384
	6.67444	2.99957		5.3972	3.7909	10.4435	9.45573
2.37926	3.42952	3.96875	4.68928	5.41511	2.69376	10.1217
4.70801	9.2326	8.73108			4.9213	5.45021	3.03499
	4.7056	9.32327	1.92734	11.2777		12.7279
5.99503	3.3311	4.40226	7.01605	6.34659	2.0128	5.68782	5.62784
4.18237	3.52078	5.41505	2.63025	6.80412	6.8009	4.17374	2.18648
4.16385	8.12444	6.47333	7.24788	6.59501	9.01917	8.4343	2.37252
3.07939	3.60254	4.18195		5.16606		3.40794	7.76481
	6.25033	3.11061	5.98829	5.46834	4.7622	8.69252	7.45665
2.05405	3.53008	10.0545	6.17224	4.72006		4.16673
5.67332	3.79072		2.31178	5.815	2.41734	5.25684
	8.90183	6.71651		6.18277	2.67558	5.96936	3.47651
	2.02477	3.20856		6.44591	3.61011	3.61096	2.14753
1.42418	4.65826	14.6162		5.66499	2.40847	5.2571
4.95161	3.23941	9.35569	6.6986	6.00786	7.27008	7.55673	2.5279
		3.11672		4.9099	4.00174	6.19481	4.42314
2.81082		7.37508		6.01787	8.67305	13.2951	5.07095
3.10609	1.5101		4.18027	5.90633	4.29385	6.34601
	3.62118	10.7188	2.09806	6.85872	5.66434	3.35594
5.19777	1.72961	14.6648	1.72281	5.72233	2.48568	5.7653	8.1546
1.9607	1.85157	3.26439	4.00233	6.42099	8.28719	4.06538	7.90825
1.67773	5.50419	6.48819		11.5733	5.13775		9.11731
2.48394	1.71981	7.71266		4.99712	6.75757	7.75761	2.62378
3.14726	2.5972	6.29951		4.91159	8.18114	8.38193	10.3134
	4.1892	9.66261	4.9929	4.97782	2.82004	10.363	1.93596
3.16304	5.72209	4.11095		11.9129	3.35365	10.9105	2.5791
6.91879	2.73066	5.0118	2.1599	5.24193	1.97693	6.4101	4.02144
3.914	2.98209	4.89903		6.69762	2.97677	3.45937	9.45952
1.90477	8.63393	10.6809	6.91632	6.29766	7.80993	4.08395	1.69053
5.98611	3.49167	5.0439	3.48886	6.10759	3.67096	12.2378	8.83981
2.10339	2.2728	4.24359	3.66347	5.75639	2.21504	8.25507	6.22882
2.84221		4.15206		6.03627	2.43543	5.28319	3.98344
		3.4953	3.15379	8.44958	2.81879		4.7607
2.97719	8.77702	9.18959	7.78968	5.90667	4.45355	6.10936	4.81229
2.82996	2.21267		4.26842	5.19867	2.10365	13.9413	1.48882
2.88177	2.20389		2.87431	6.07383	1.86393	6.85878	4.20049
3.82294		5.36177	2.30486	4.5116	5.3726	9.99864	3.65234
4.70921	7.43202	9.25839	2.52315	5.48077	2.97304	8.19571
1.92193	3.03512	13.5127	8.11618	5.06634	4.89642	9.42413	4.47684
1.45972	3.02209	5.6423	2.93025	5.62075	2.11629	3.19484	3.65219
	5.097	4.60397	2.03202	5.97187	2.73095	4.01491
1.75116	1.96062	4.14244	2.04312	5.58501	4.30813	3.48674	3.20775
2.40267	9.22686	11.3321	3.08512	5.5493	2.68127	3.45703	5.40842
1.90172		7.75953	1.58445	4.63284	4.19225	6.64348
5.47192	5.87535	3.93427	3.08771	5.11003	3.01251	6.1812	4.54965
5.36883	1.7393	6.22078	2.42469	5.67105	5.08772	8.42329	3.39915
2.25709	2.86525	7.3215	5.87836	5.1799	5.62782	6.12442	4.99316
3.3303	2.00969	5.40753	2.65272	6.76794	2.31324	3.41028	7.38483
5.07172		3.4431	9.6884	5.6418	2.58343	4.30334
2.46025			3.05284	5.56407	3.27349	12.3482	3.61079
5.5069	6.07091	3.78359	4.23886	5.53911	2.33928	3.39436	1.60873
	4.48673	5.42108	3.87234	5.9575	2.7769	3.79562	7.7231
7.49972	4.23828	11.6655	2.98294	5.59829	2.40361	5.52385	1.82832
7.95147	4.25812	6.034	2.5497	5.24196	2.78147	11.9477	2.32066
2.86905	2.2189	5.1721	5.30182	5.46252	2.58216	3.85271	4.48669
	3.62374	5.73694		4.64062	1.96426	4.85609	4.34694
2.17018	4.25276	10.8253		4.0509	3.25327	3.85246	5.3932
4.89105	3.80974	4.17407	6.99575	8.35335	3.70461	4.68845
2.63254	3.58876	5.85832	7.91809	5.62556	3.74517	5.08736	2.48139
3.02959	4.1145	5.8513	7.85929	4.76112	5.12004		1.71544
4.73744	4.89477	3.75602	1.69224	6.58546	9.11047		3.61401
6.05782	5.40859	12.0148	2.06487	7.07738	2.80614	5.9978	1.86862
5.52945	1.36703	4.96372		5.66605	2.04092	9.09047
4.01504	6.81946	6.15167	4.52424	5.40802	5.2438	4.8013	3.46904
6.69333	2.75581	8.06732	4.03981	5.65034	2.6534		3.29174
1.78377	4.14789	13.3146	4.38193	7.37158		7.10759	1.87469
1.9547	7.47267		1.93727	5.16528	4.0509	8.14615	8.32902
1.78601	2.30863	5.95841	2.76012		3.78631	6.85703	4.04684
2.08965	2.47829	5.86362	7.3323	4.93465	2.94944
2.38889	6.58457		4.27636	4.97193	2.11462	5.51337	3.82266
4.58721	4.99862			4.55687	2.11945	4.92639	5.67137
2.39096	3.81725	5.6156	1.93437	5.33992	2.31176	10.4238	3.89468
6.10246	3.10221	5.69067	2.65147	6.46269	2.17568	3.79797	3.60617
1.81338	9.31128	5.6246	2.21477	5.24239	2.49733	3.84968
1.59671	2.35809	9.78275		4.64217	2.93026	4.44704	3.87367
5.67537		6.03552		5.54677	4.34348	10.3237	3.43043
3.03228	2.41371	4.24394	2.41358	4.74318	3.06719	4.69296	3.16578
	1.83455	3.96414	3.7818	5.10746	2.93313	5.26097	3.00397
4.92865		7.00665	2.41383		2.71235		2.31492
3.45724	2.46477	14.781	1.38781	5.17856			2.11
5.6004	6.55451	4.21335	1.66443	5.19291	2.79915	4.70232	4.15248
3.34705		7.13168	4.72261	5.70824	4.98889	6.34673	4.7567
5.85424	1.96665	14.8104	1.98763		4.64911	13.7369	1.97237
4.59255		6.38965	3.32518	4.6654	2.78363	3.50763	8.00801
2.56143	4.03481	5.43568	3.22657	4.85448	6.2731	3.93987	2.72756
1.82159	6.51048	4.24312	1.534	5.34306	4.02716	7.23344	2.0752
5.3809	1.77559	5.70987		5.0063	2.26721	5.37206	2.29665
2.56076	2.81191	3.26982	3.2041	11.8794	4.34914	6.60634	2.24339
2.76215	1.74387	12.0788	2.10586	5.47516	3.09801	3.46834	1.96544
2.89283		3.08809		8.98671	2.56088	3.39803	2.07558
	1.79411	5.14957	1.84719			14.4035	2.62822
2.1843	2.1981	5.09338	2.15999	5.55002	5.13142	3.06018	3.11315
		4.95554	9.05656		3.70929	6.74003	4.74387
2.54779	5.7941	4.7854	6.56828	6.33475	2.14478	4.51947	3.44983
2.56448	3.25706	4.33603		7.02813	5.9492	6.37907
3.00656		3.10699	8.33469	3.99513	2.51825	11.6486	5.85428
3.17612	7.95808	10.4059	2.5844	5.29006	2.97748	4.08032	8.06192
4.1954	2.76959	5.35744	3.03917	4.45877	2.27747	4.7233	9.61717
2.45251	2.87203	4.79073	6.02278	4.99272	3.48072	3.21791	2.06332
2.27747	1.73367	3.60416	2.88661		2.37687	4.95589
2.63699	4.64533	4.87467	2.18481	5.38852	3.36377	3.24957	2.07141
2.6249	7.91576		2.40826	8.26264	3.43364		2.19347
4.91209	2.86897	4.95211	2.91529	4.335	6.05202	4.55879	4.08849
6.66263		7.6142	1.9818	6.85594	8.71001	8.39668	4.79469
3.48865	1.61383	3.06157	2.34282	4.86359	3.77391	2.92766	2.01517
4.8828	6.72874	12.5373	6.06724	4.90837	2.83733	4.52819	5.50128
	2.05222	4.19946		6.43886	2.96309	3.79888	3.073
2.44742	2.73822	6.68443	2.12537	5.16187	2.69154	7.7635	3.49864
7.78487	5.24548		3.94711	4.92118	4.75445	8.22147	4.21687
2.71233	4.68215	8.63753	1.62002	4.93078	3.86978	9.80861	4.25819
	2.13667	15.8495	3.21718	4.73689	3.26318	11.0131	5.71439
	3.39028	11.1877	5.99158	9.1805	5.44501	7.10544	7.30503
2.31415	2.3654		4.45168	4.0247	2.91941	5.73991	5.17963
4.77694	3.71883	3.02806	3.45255	4.16119			3.64096
3.04752	2.60081	7.25832	4.09376	5.18625	4.20041	11.1155	9.21024
2.27838	8.30412	8.16551		4.36824	3.34189	3.59761
3.53036	2.21225	3.49037	5.66589	11.8849	6.03759
1.5288		11.3189	7.87211		6.9965	4.47046
2.95628				4.3844	4.94538	7.82004	3.18873
2.21473	2.71027	2.58876	1.63917	10.4454	3.34934	6.30965	6.45685
2.9119	4.00083		4.561	5.49935			9.51627
2.46887		3.95612	4.67005	4.21588	2.95125	4.3247	3.29173
1.90354	3.2388	3.545	1.40832	13.0044	4.52277		5.33475
5.92921	3.22579	3.58824		5.09021	3.09212		3.08942
2.04789	6.49875	3.60872		5.18504	2.12415	4.79643	8.42938
1.69878		5.01347	2.25134	5.20503	4.41893	4.07714	1.53091
3.17346		15.8722	1.90832	7.86885		3.08661	4.52864
1.91629	2.69991	5.31271	1.71745	6.06985		2.94714	6.35713
5.26836	5.71998		2.97927	3.96183	3.12306	3.18557	3.41637
1.81365	2.77809	2.49498	3.53034	4.05239	2.83939	10.8886
	2.15029	4.29179	7.57553	4.88282	3.81659	3.08263	5.23952
1.82541	2.69073	3.36227	2.42994	4.70578	3.4884	4.7272	2.27538
2.30458	2.99131	2.56138		4.949	3.74174	3.82069	6.51723
	3.45222	7.56596	7.18295	6.40692	7.10069	6.47018	2.69747
2.58908		4.08587	4.41142		3.06348		3.35095
2.7578		2.92215		5.49373	3.10181	3.81503
2.08782	8.3703	2.97439	5.03253			7.66167
1.74721		9.32305	5.33229	6.59692	6.08632		2.13488
3.28303	2.63493		6.44129	4.80147	2.64429	4.69116
1.92291	2.75678	3.88314	1.87514	5.17468		2.96521	3.71898
3.43933	3.13512	3.87622	6.39688	5.40355	3.45355	9.68136	4.2359
2.74559	3.03768	15.3947		5.12344	2.7933	3.32845	7.07249
2.05515	3.39705	5.6242	5.53274	4.09836	3.12646	3.36473	2.85754
2.43839	3.19793		1.98356	5.82179			2.96783
4.03927	2.38909	2.35546	3.26792	4.95735	2.41252	12.1232	8.01981
1.99323	2.49202	5.40392	5.54404	4.88969	6.92365	5.07043	1.63091
2.56253	3.36471	12.3649	6.7413	4.56764	3.11362	5.10611	2.30966
2.56814	2.82347	5.50937	6.11883	4.28463		15.0591	6.80151
3.8215	1.40878		3.43835	4.88491	7.24242	10.8529	3.71967
2.48444	6.66431	5.90679	7.36599	4.91643	6.23192		6.27709
7.2767	3.20675	5.24487		8.35918	8.39648		6.01003
2.13063		5.67314	3.32526	12.4729	4.26127	3.82187	4.57109
2.87805		8.42588	2.12471	3.9833	2.93967	7.24158	3.93301
2.04453	5.8875		3.69288	6.14242	4.00976	4.20639
3.73376	4.18661	7.72699	5.9205	11.5042	3.07444	12.0493	2.57853
3.0741	3.43858	7.90023	4.21037	4.60774	4.60304	8.69996	4.87459
2.6909	2.88931	4.00117	5.39404	4.24617	2.43757	7.62158	3.19737
7.18758	1.99788	6.62899	4.77054	3.96262	2.60251	7.33369	4.03413
2.11918	3.31856	5.86194	4.78712	4.93341	4.29788	9.5953	3.48018
3.79429	2.12931	9.57837	4.94281	7.04851	4.36434	3.19191	7.77643
	4.13041	4.0466	1.76163	7.32782	8.83661	13.1708	2.74814
1.6431	3.20979	4.45528	3.38323	3.74912	3.1897	2.52731	3.06767
6.00098	2.37903	2.62023	4.37159	9.53062	7.6172	4.01896	4.93341
1.88153	2.15512	3.437	2.72034	3.61102	9.28314	3.38683	6.88365
5.85489	2.05176	4.50183	4.16883		4.91064	2.95982	1.97694
3.21093	4.39392	9.70369	4.99734	6.57842		10.0139	2.64452
	2.27981	3.44712	5.42609	5.37618	7.40587	10.3738	2.76453
	3.08687	7.34257	2.97541	9.36658	3.90527	3.01832	9.47953
2.57501	3.44912	3.82273	5.58073	4.67096	4.25937		4.36406
		6.24323	4.06296		2.26291	4.83261	3.44471
	3.04196	7.40481	3.82333	7.11684	9.38738	5.71663	2.6394
2.84666	3.81124		2.99593	9.36658	2.87482	3.598	10.6107
2.49582	4.06858		3.08287	3.55027	8.06726	3.4212	3.07426
4.31697	2.2161		2.64073	4.68712	3.63528	5.80351	2.72671
	7.16374	15.5197	3.33812	2.93491	5.25452		3.41811
1.33153	2.05038		4.51482	2.95551		3.58042	2.90172
2.78787	1.85624		3.47308	8.56451	5.76119	3.73307	7.48535
3.42037	2.67817	3.87959	4.28073	5.26266	3.45032	10.5111	8.45219
5.21768	4.90772	3.65829	6.01588	4.42847	3.47213	9.10362	3.73491
4.45575	4.11497	3.58025	1.75368	10.4673	2.36057	8.80965	5.74849
4.41166	2.13768	5.16672	5.57353	3.8096	4.24142	4.71205	2.41321
1.9497	5.0733	6.26633	2.88334	5.24929	2.5279		7.75058
3.13483		9.85263	5.35728	5.57135	4.24869	5.54564	3.05489
4.03424	2.14187	3.07255	4.77317	3.55914			4.8353
	2.8596	3.6228		8.1067	5.54276	5.14117	5.83173
1.91161	1.74433	3.36519		11.5544	2.77822	5.68078	2.66762
4.24286	2.12838	6.35838	6.29495	5.60603	2.03632	3.9917	6.87914
1.56963	3.98714	7.88808	3.08772	8.51912		3.91151	3.13267
2.72794	4.12033	4.9986	6.46756	3.16426	3.87354	5.42566	4.19186
	3.55673	5.97714	3.33206	4.64371	2.71602	4.01381
2.4827	5.50257	7.09709	3.15034	5.53802	3.52831	3.18503	2.83445
		2.57499	3.83434	7.69194	2.57585	3.95882
		7.72983		3.60487	3.04247	8.38233	1.93453
2.79352	1.51077	9.17683	2.33789	8.17926			3.27939
2.10773	2.67726	8.30854	3.61407	3.56978		2.85607
		5.75484	6.74316	3.73047		3.03409
2.43511	8.55251	2.73264	2.7244	5.54968	5.69193	4.26374	7.44865
2.89798	5.15471	11.4701	4.62716	6.9933	5.7515	4.88327	2.137
2.42834		3.98014	1.90175	5.50682	3.63703	4.74466	10.7393
3.21695	2.25369	4.32729	3.62001	10.1314	4.22822	5.5343	6.76254
6.76126	2.78878	7.82178	5.9024	7.6606	6.93603	6.94006
3.70949	6.45477	5.20906	3.64511	4.27849	6.3961	3.5701	6.29832
4.79081	2.19049	14.3196	4.19277	3.90021	3.0684		10.3664
2.98994	2.8089	10.5517	4.52164	4.94119	2.43746	5.1756
6.21471	3.56381	3.1617	3.6115	5.14722	2.71399	5.90463
3.37209	3.44441	4.424	4.36945	4.77344	3.01739	2.7023	2.70039
	1.80328	4.00896	3.71591	4.45638	6.6442	5.78595	3.70085
5.86365	2.25204	5.10896	3.20304	4.50284	6.42725	9.495
4.43454	3.92922	13.8674	7.43414	3.71268	2.31785	4.51605	4.35315
	2.65841	3.61695	9.99875	6.18315		11.3861	6.0621
4.4312	4.43956	8.37131	1.81828	10.254	5.40118	3.80157	2.32474
2.15002	2.06803	8.40939	3.876	4.2686	2.14414	4.50166	4.65014
3.45352	1.91394	4.09668	2.27412	4.68484	5.59123	8.92148
5.43914	2.45547	4.95169	3.09567	3.7634		6.09744	2.49998
3.74764	4.94398	4.73598	5.73839		7.55507	4.74535	2.6833
3.34261	2.57146	5.49261	4.33071		2.48798	11.9733	2.70692
3.86368	9.02753			4.21833	2.63442	4.41492
2.23953	1.71189	9.37149	5.56587	4.40185	2.67219	4.06009	1.78094
2.77235			6.92901	7.56233	5.44949	2.96417	4.67471
	6.2276	5.01385	5.95237	3.97685	6.31244	4.29584	2.92039
1.96379		4.55508	2.86612		2.23323	4.49084	7.13094
3.80023	2.68513	3.9631	6.35643	3.83551		4.35503	4.57645
7.15403		12.7498	2.24351	4.07922		3.34096	2.79086
1.92174	2.75023	9.92831	3.93188	3.10205	2.54954	2.73906	6.78232
7.004		14.5696		4.56486
	4.97224	4.39661	3.10477	2.84512	2.6097	6.79742	11.1756
4.54192	3.20201	6.7459	8.47014	4.47752	4.52607	15.2286	10.0064
4.69377	1.60505	5.35123	4.69812	5.03638		4.33014	9.94272
1.77647	1.87496	9.13885	3.26499	4.69553	4.21152	6.01671	4.34849
5.03272	3.28232	3.41222	2.20641	3.41925	4.79858		4.24968
3.28112		4.14259	3.72611	3.10564		5.65118	3.1737
	3.28885		5.26733	5.21658	2.7138	4.59874	3.48711
4.63923	5.71355	5.00586	3.00591	8.05013	4.23772	10.9256
2.66322		8.62733	4.20874		2.53195	4.07326	2.73499
3.42297	3.47218	9.907	6.76834		5.39251	8.75801	4.80928
2.78596		5.82458	2.44462	10.8013	4.39259		9.96049
	7.18761	5.90459	3.03159	4.49273			2.52756
2.69756	3.99813	4.64365	4.24165		6.22254	4.82416
2.02404	2.15784			5.23227	4.03722	14.384	2.90372
2.69202	2.10063	6.21213	4.14945			5.44235	7.04636
7.34937	2.119	15.9029	5.54088	7.83784	2.25281	5.81714	2.61211
7.15044	1.98752	13.4284	7.64891	5.00349	2.38345	4.29251	3.83359
6.08684	3.25381	9.33428	4.345	8.82544		6.17715	3.79482
7.51572	4.65774	5.4873	4.30729	3.89555	5.48783	12.2893	3.26985
3.97706	1.49607		8.448	6.15584	2.9437	3.6853
3.23192	3.34209	15.7042	1.5777	3.94533	5.81934	5.75507
2.54398	2.76343	5.74423	3.33829			7.41302	10.729
3.1727	6.18013	7.1343	2.63046	3.64146			4.11427
7.54931	2.11409		7.12271	5.52024	3.37851	5.674	1.96511
4.37037	2.17602	7.6349	9.92962	2.76475	5.90399	5.03017	1.91636
	2.53431	5.54045		4.92191	2.90021	9.46512	4.10773
6.62883	1.91341	3.67863	4.55994	3.52358	2.87955	5.57277	3.28963
3.66344	1.95539	9.85521	5.45517	3.71772	2.2421	10.4438	8.53661
1.91994	2.69293	9.41847	2.18955	4.22507	2.36517	10.4568	2.44563
7.60696	2.31858	6.18133	5.01794	5.80611	6.64786	8.00403	3.66448
2.11272	4.11798	8.84985	9.73684	4.83117	2.9808		2.42839
2.57145	2.24448		4.35084	4.55436	2.80943	7.25058	6.20968
2.02736	2.0244	7.80137		10.6859	2.38876	10.8767	2.50241
3.38458		12.5883	2.66093	9.104	2.84297	14.9719	6.62711
3.96761			2.28854	3.18311		6.79368
3.07324	1.84951	5.7365	3.89748	4.46465	2.97198	8.71577	3.59069
4.90125		6.40086	5.31935		3.72693	6.04012	6.44054
	5.41346	4.10185		3.62941	3.13968		2.53198
3.54914	2.25605	4.50983	4.11802	5.88184	5.547	13.8016
5.53374	2.39933	10.1843	2.81377	5.30582	7.939		3.5384
2.40837	7.45414	5.21323	7.18486		7.38586	5.70068	2.90079
6.62638	3.5065	6.36463		5.55357	5.04117	6.05048	5.51593
		12.3856	3.85945	3.42409	7.87418	3.79128	10.073
7.77632	2.5641	2.90509	6.18016	3.87443	3.34485	3.90951	2.52039
5.9487	2.4912	9.45785	5.5031	4.21472	3.01645		3.22125
2.78412		8.31911	2.53035	5.0247	4.74631		5.04428
5.29269	2.43297	3.79483	9.83014	3.94553	2.83476
2.13027	6.83988	2.85683	2.73044	3.92564	2.26514	4.25822	4.52712
		12.0289	5.19331	4.11684	2.05447	10.2654	11.3149
2.04237	2.24463	4.4022	3.08168	4.70801	2.53548	12.407	4.15297
2.53745	4.38697	8.97852	4.49865	11.7773	1.66141	14.1323	2.48105
2.94063	1.83956	14.1495	5.17979	5.03497	8.28514	5.08322	3.09358
5.11703		15.6527	3.70225	7.92057	2.64186	11.4911
	1.80333	3.2422	2.46993	4.76158	3.28387	2.61397	5.14268
	4.484	3.34299	5.87618	5.42783	4.07091	7.70086
3.1692	2.86833	5.356	1.95682	4.68551	3.50735	5.30194	3.09071
		3.1219		4.66641	8.4747	8.35416	5.27406
6.21975		6.27714	3.07339	7.34437	2.14236	3.06337	5.56812
	3.70132	4.6301	6.07198	10.0549	7.72015	8.56196
2.79825	6.79274	4.07639	2.5144	5.73917	3.67709	4.27606
3.79063	2.06303	15.9782	7.95999	6.04152		7.62862	2.21754
4.30415	2.2363		3.05692	3.42406	1.59467	4.49612	1.66186
2.1805	2.11088	3.20146	4.58608	7.33775	2.52031	7.21257	1.83764
1.9988	4.37923	3.45226		4.15192	2.09097		3.00316
6.10933	2.30546		9.70593		4.52325	9.85575	2.81754
	7.45057	5.98184	5.81457	7.40775	5.01807	4.32246	1.60205
3.2995	8.05599		2.43198	3.85393		8.61394	5.46738
2.47717		6.03371	3.62119	3.86853	2.39188	12.9155	10.6749
			6.96656	8.79148	1.909	12.1951	1.72902
	5.7551	4.91635	2.91075		1.65504	5.81766	3.21986
3.49731	1.87961	4.78482	2.74741	3.71776	2.8085	10.2818	7.27792
4.41968	4.05918	3.15468		6.34805	5.3587	9.03153	2.85524
2.63561	5.86243	2.89044	4.44804	5.33069	2.29268		2.55591
1.73009	2.01919	14.7448	4.19644	3.70462	2.35747	4.70467	2.83428
1.89041	9.41723	9.40119	2.10734	7.38691	2.22688	7.56746	5.16928
2.02004		5.14285	2.95809	4.10722	1.95029	3.75505	3.95126
3.02052	2.14882	3.32427	4.26949	5.42503	1.49492		5.75835
1.81146	2.07553		5.64784	4.74279	2.91887
3.27435	4.14669	8.17031	2.54082	5.23137	3.69997	8.49915	1.63661
1.86198	1.77908	3.69542	2.74731	10.6087	2.06465	9.9101	3.68976
2.97295	3.0715	4.81658	7.35299	3.75864	2.55168	4.31751	1.75114
2.72332	1.53018	5.62925		4.36954	4.3863	3.63777	7.04321
3.21566	1.94096	15.5705	3.28067	4.68447	2.80182	2.60292	2.6723
3.70179	3.55002	3.51475	4.57086	4.51413	6.39512	4.58569	2.08078
1.97601	1.30442	4.10483		8.49634	2.689	5.80828	2.50124
2.24275	3.57584	2.9309	3.15803		2.75998		5.22052
2.93429	2.48926	9.89503		4.02928	2.10433	11.1602	11.1151
6.87729	2.51504		2.44451	2.94456		15.1086	1.76596
2.35317	1.94134	7.5489		4.13861	8.58385	5.63384	4.00906
4.83412	2.3597	9.23516		6.52656		4.01642
2.39281	3.5069	5.17072		4.43674	7.09588		1.80031
1.99705	5.73611	5.55531		4.42139	4.13308	9.3082	4.04558
5.17039	5.41849	2.6964	4.33087	3.64699		10.8134	2.49002
2.40786	4.07585	8.07203	6.40155	3.26613	2.58707	10.773	1.81776
2.71536	4.65352		3.65161	4.79184	1.85382	4.38015	2.53733
3.26353	2.82186	8.10855	6.37473		5.80004		2.90672
3.89544	6.23381		2.48791		2.67625	4.69975	6.98117
1.89842	2.40314	7.02217	2.11572	4.27249	2.9972	13.2553	3.65178
2.42153	2.59953	8.22202	2.37362	3.88727	3.99116	4.12653	2.65429
4.24823	6.82285	7.24261	3.63351	5.4677	3.32006	8.93556	2.15833
7.28922	4.85747	5.29748	2.21141	6.14714	1.84218	6.07425	5.03664
6.04936	5.33622	10.3247	3.32092	5.49596	8.89705	11.9646	2.44085
2.87222	4.30406	4.73537	2.73396	7.17477	4.57105	4.51418	1.53505
1.98582	6.96299	4.02666		4.78554	5.11142	4.51721	3.61325
2.63408	3.63795		6.97877	6.07295	2.896	4.743	3.88321
2.72142	8.21326			6.92963	3.11142	5.22476	7.42464
2.37398	4.19487	5.56413	5.87482	3.78893	4.2187	11.4746	2.70473
4.86785	2.63557	15.7883	7.68982	9.53302	4.80466	5.51936	4.10864
7.50515	5.9492	10.2295	2.03016	3.17587	7.78582	4.45845
2.49223	3.16987		2.79347	4.06906	6.83094		8.04422
3.13603		10.2489	7.95178	9.61403	2.0659		2.28315
3.99336	3.04732		6.00813	5.05124		4.02289	2.02761
	2.84432	5.63368	4.5112	5.66563	2.23652	6.0817
1.73687		4.986	3.67465		1.68825	6.8196	1.8478
4.70506	3.41628		2.73195	3.76263	4.76674	12.8819	1.97637
3.34486	8.10809		2.64049	6.49368	3.86378	11.421	3.97314
2.13554	1.98708	6.02661	7.25697	3.60473	4.45288	11.8539	7.0833
1.98582	1.87452	7.68537	4.16203	4.7987	3.55223		2.63119
		8.18699	2.15552	4.7926	2.99569		1.71447
2.59472	3.74789			3.0847	2.73415	4.29655	4.9595
2.93953	2.34084	2.69919	4.68033	2.78842	2.73924	3.30571	4.41757
1.70184	4.71925	10.745	4.69154	5.90639	5.7492		8.18677
6.26323		5.50034		3.30502	4.38619	2.91603
	5.57474	9.55119	6.82573	3.95081	2.65902	5.67561	4.48128
7.73931		16.1431	4.40102	5.99126	2.53346	6.68477	2.35026
1.80637	5.93958	10.2588	2.86859			11.3233	2.65029
2.50227	2.4806	4.76984	2.64817	2.44032	4.92369	4.57132	2.5557
6.37656	2.59342	8.56272	3.30339	4.43364	2.51541	3.5625	4.89269
2.49811	3.46966	15.6455		5.38576	2.04565	7.06871	3.69289
1.73706	2.59944			10.021	3.19518	4.0773
1.75377	2.71601		6.41811	4.78987	3.40647	3.76733	3.13154
3.45562	6.18875	9.46936	2.1306	2.70427	2.60452	10.1965
3.31209			3.47763	3.36912	1.87388	3.99355	2.68982
3.61423	4.09587	3.76591	2.6499	4.703	4.90273	5.86179	1.74275
5.47758	7.63004	3.88806	3.50702			3.47819
4.37115	2.73866		3.13625	3.86869	2.79311	2.87601	3.33174
3.27879	2.6347	5.18169	2.56167	5.54025	5.67921	6.99507	4.06299
3.46475	2.70583	7.02268	3.46539	5.98302	7.99474	5.04315	1.82422
4.60464	6.37638	13.0869	2.75313	6.61108	2.78874	5.93451	7.72809
4.16793	3.79004	6.39747	5.20006	8.38623	1.61241	2.99721	1.96379
2.64625	2.44	3.61909	3.31497		3.05173	12.7452
1.8873		7.66592		10.0522	5.35841	8.04446	4.00011
	3.81251	4.62252	4.02165	2.68766	4.88072	3.48005	4.06726
7.36873		8.93362		2.83152	1.59875	9.6125	2.56435
2.71217	5.86008	6.4168	2.05994	7.87706	7.425	5.19064
2.83858	3.95256		2.59911	4.97678	7.87712		4.62517
4.25019	3.69296	3.62386	1.96804	3.22104	2.51425	6.40279	2.22452
	2.74425	3.62687	2.95799	4.34693		4.02499	1.90892
2.65449	4.2891	3.08498	2.71803	3.4825		3.36977	5.06616
7.33884	3.43469	13.0625	4.03847	5.08801	1.59561	8.65294	6.24431
7.23058	2.63132	3.69882	5.56615	6.31096	5.40067	4.0226	5.32037
3.27723	5.20173	6.99582	6.10666	10.0743		3.61122	3.27467
2.49709	3.85155	5.03358	2.51511	4.34546	3.92848	5.59558	1.60032
2.42733	9.04055	7.54023		9.72342	2.33686		4.10677
3.40179		11.7375	2.70863	3.71208	2.21368	3.25559	1.56677
4.02266	3.96053	4.98526	3.38849	3.64964	8.97454	4.42915	1.86424
3.63982	2.90271	5.00962		5.91457	1.7233	8.58755
1.57114	3.43171		2.38446	3.10242	3.03577	2.78822	3.74399
	2.5285		2.12067	12.3794	2.90779	4.29314	3.70147
5.39378	6.52683		5.17725	3.92713		8.26158
7.12355	8.34954		4.50468	4.35269	4.69899	3.13649	1.69198
	5.86914		3.53987	7.13369	4.67987		2.29735
2.15596	2.62096	3.6806	3.06418	3.65562	2.83318	4.91954	3.21491
7.13109	3.55085	9.94737	8.70949	4.84839	2.31338	5.00537	1.71965
	4.62715	4.65596	2.18168	6.27969	2.64304	5.99265	3.42696
4.37371	2.82812	5.37683	3.09084	6.01884	1.63425	4.81274	1.75545
2.14451	5.23948	7.66045	4.01494	7.11596	2.65812	8.99149	2.33865
3.31733	3.28151	4.83436	2.11094	2.87268		3.07662	1.44481
6.84256	8.65413	12.1426		2.62887	3.20643	2.86253	7.19659
	2.32602	3.16864	2.50006	5.38504	2.53497	4.97369	4.38429
3.51156	4.04169	4.01776		8.85936		3.31081	3.21427
	3.50031	8.20891	2.01052	3.61803	2.29427	3.9592	2.47547
	2.41692	11.6417	1.98975	6.69873	7.36169	4.23787	2.41682
2.92169	3.72956	6.36302	1.92171	3.03432		3.21379	4.74387
2.30729	4.83842	3.04286	2.28511		1.87609	3.97504	1.84499
6.54352	2.90417	8.30745	9.32352	2.80893	5.71327	5.23705	2.36164
2.86866	2.49374	3.22684		3.74104	8.96236	4.1983	2.58385
6.66872	8.91539	4.11674	1.89889	7.67606		5.29914	3.0931
3.80495		4.23805	3.65247	4.60577	1.96427		1.85329
3.18335	1.63321	7.13364	2.62649	3.03909	2.91949	7.44243	2.50239
6.62971	3.83325	5.85095	2.70158	4.73117	3.74813	4.87927	1.87245
	7.21207	8.08748	2.87044	3.73637	2.08785	11.802
2.37405	3.98834	5.2561	2.66153	5.39893	2.82265	8.19895	3.14566
	4.9516	6.00902	7.69081	2.72415	2.94699	2.83557
3.19245	1.80716	2.9252		3.9474	6.29267	3.34751
4.16662	3.51247	5.16243	4.03424	6.79972	2.38115	3.45086	5.3539
5.03045	2.41508	10.4346		6.25519			2.42023
3.83798		8.31924	2.5206	2.39635	2.25337	2.91668	2.44888
	6.35971	11.0238	3.078	2.73584	2.73519	7.43724	2.06937
1.72878			3.46925	10.9191	2.04276		1.68984
2.1739	3.60822	5.24338	4.61758	2.86139	3.91458	6.6917	4.44287
2.34147	1.63482	5.60822	2.59454		2.57471	12.1207	2.20776
	5.8798	5.48639		4.82197	7.46319	7.19391	1.85094
3.56852	1.86861	4.47596	3.80624	3.8866	2.36259	2.96449	2.29339
2.21016	3.4979	14.2363	2.64712	3.95349	6.39375	3.37479
2.58509	3.97693	12.2117	2.55024	8.74083	1.89933	5.16193	4.89816
2.80224	2.82192	7.38106	2.94439	11.0835	3.1249	3.17799	1.8074
1.52656	3.11204	4.32478	1.83992		2.94884	6.27559	1.42089
3.95028	2.36691	2.8836	1.75388	3.13097	6.90107	6.45413	1.64147
4.19675	5.93676	4.98222	2.60445	6.67415	4.96245	3.87063	3.34505
2.2291	1.90671	5.7661	2.27105	3.09811	2.9059	3.03296	4.80732
1.56018	2.04009	12.8777	5.03879		2.3385	3.42508	4.34061
3.97635		8.86223	2.45022	3.62508	2.36757	4.50841	3.09023
1.69744	7.46032	7.49696	1.85817	3.10168	6.75337	5.30729
2.65509	1.38844	5.60464	4.17482	9.22684		3.61973	1.81808
4.123	2.68203	7.17308	1.96638	2.69395	3.46375	6.15797	9.45238
2.9731	2.65604	3.80324	5.19312	11.9845	4.81498	3.83917	2.18627
1.85921	3.22052		2.65984	6.99571	5.75772	12.1898	1.26189
2.82513	2.55963	4.69153	2.82742	2.98474	8.53257
4.25839	2.44239	7.27715	1.88712		2.24096		6.56731
2.48713	3.45205	9.06778	4.31881	5.02718	2.61482	3.95366	4.13813
5.24236	2.0208	7.41544	1.71557	2.82001	4.72169	3.13564	7.13081
2.8985	4.97331	5.94661	9.89507	2.7996	6.14156	8.40218	1.73107
2.18266	2.35905	6.24037	3.8525	8.94864		4.61571	3.57391
1.94261	5.13818	5.50368	2.45728	4.30271	4.51187	3.07944	2.33767
2.00956		11.444	1.51183	3.49292	4.02874	8.40114	3.41964
3.0926	1.68427	4.37576	7.67037	3.58975	9.12358	11.9301
2.11216	2.45939	4.46043		4.29235	1.98056	4.49994	5.916
3.18428	4.45756	4.09117	1.82605	2.55208		3.90616
1.86358	1.85103	12.8989	2.10548	6.23433	2.8469	5.96599	8.58057
3.07215	3.50912	2.79925	3.20364	9.18725	7.57867	4.27066	2.26526
3.32273	3.15973	4.26638	2.12411	5.85199	7.03528	4.65646	2.48734
3.24405	6.38037	15.5448	4.07806		3.10931	5.44441
2.78226	1.48115	2.86523	7.31361	3.24052	3.93364		11.0511
6.87603	4.53175	5.27921	2.18097		9.33936	4.71478	5.3744
2.4631	1.79515	5.539	2.22192	3.99742	4.47989	7.67294	10.8783
1.86886	7.77338	4.39192	2.58766	3.00372		3.45728	4.07773
3.76898	2.34777		2.3417	5.21172	8.50281	3.19231	8.47497
2.54148	4.65695	8.87292	3.92845	11.3396	2.70934	3.79015	5.31971
2.25518	7.24911	2.8828	3.53281	5.86528		4.75945	1.94265
1.88435	4.51307	4.33096	3.08786		3.72287	2.39304	1.6211
3.68336	5.20918	5.81517	1.67756	6.01025	5.30221	7.14082	10.9699
2.72058	2.34932	3.16885	3.46707	4.83662	3.02879	4.439	5.6715
2.50791	6.00256	4.23161	1.84139	4.86047	5.22462	3.6314	5.80899
2.672	2.52069	8.16907	2.16006	7.17397		6.15282
3.51297	3.24641	4.76012	2.78996	4.59525	4.43014	7.925	2.80994
4.20378	7.93427	3.44093	2.48971	3.78046	4.85743	3.0247	2.27911
2.53197	4.53398		4.46931	4.01002	4.80753	9.4343	6.16525
2.44534	6.66759		1.63239	2.5671		3.24284	3.46313
2.50315	1.92025		3.19167			7.50157	6.62993
6.11845	8.04934	4.15767	8.89062	4.59558	2.76002	3.13977	2.44778
2.18334	5.89826		6.59576	4.76493	7.80998	7.36103	2.92816
4.95991		3.68318	1.42208			4.13955
5.94806	8.92218	7.6642	3.12785	4.47592		3.03022
2.13798	2.42303	14.7625	3.33819	5.22215		11.9752
3.47221	2.75225	12.1461	1.76825		3.25352	3.54616
2.72122	3.9118	8.83919	4.1066	6.4362	7.87799	4.65725	1.81396
2.20619	4.9471	4.06973	1.86712	4.03564		14.3606	4.50924
3.83881	1.95763		4.35291		2.95862	3.79027	3.96188
	2.17905	3.48601	7.44362	6.17745	5.14719	4.22273	4.32664
2.78993	5.94781	9.08617	5.88647	5.24057	1.89143	14.8732	4.20341
2.34353		7.08214	3.80638	7.39905		7.62164	3.70572
1.38656	3.99951	5.55203	3.81523	5.07711	8.71376	7.658	3.61148
1.73658	4.11103		6.1668		4.59726	4.62064	3.50646
1.60864	2.23122	4.78932	1.93101	4.52363	2.06843	2.91665	2.40417
1.86972	2.97438	5.13893	6.47511	4.38144	1.49448	8.88966	4.38468
3.26941	6.11941		2.47832	3.50716	5.97478	2.72717	6.57503
2.02596	2.84102	7.73027	1.98607	7.59309	3.50108	3.82132	10.3601
1.9843	3.14369	3.84206		3.79288	4.50845	6.3917	2.77586
1.90541	1.79856	2.78517	5.30041	7.10453		3.8111	8.87506
4.35581	4.7278	15.2729	4.19079		5.69823	2.85787	2.53721
2.01828	1.89759	7.3296	1.80046	4.94068	2.97429	2.95847	2.39287
2.19331	3.19273	7.2435	5.1387	3.41912	2.68058	4.2224	5.81783
1.98802	4.08293	3.28175	4.43933	4.52474	5.12291	2.91956	4.78791
1.6171	3.97239	4.56823	2.54621	7.86775	2.0148	3.22065	9.24156
2.22169		8.6304	3.20682	4.16505	1.46695	3.0331
2.38025	3.08138	5.03647	2.18673	4.15221	4.62331	8.72948	2.52019
2.75327	4.32585	8.92293	5.05489	6.73578	2.40822	4.53208	3.22536
3.65946		5.47655	3.47851	4.87725	4.46277		2.95374
1.65492	2.53837		3.86388	3.51547	1.69942	3.44124	1.80834
2.8079	4.93616		2.54473	12.5575	3.50246	8.35629	3.59013
1.66286		4.14606	2.41397	2.28851		3.98087	6.18124
1.63332	1.77933	4.57912	4.04929	7.21637		9.87989	3.52438
2.35827	7.67891	4.35814	2.74439	4.21083	1.62136	4.43101	3.82758
3.26394	3.94887	4.31084	6.53036	5.2884	2.60957	10.0256	2.64702
2.15701		8.87323	6.97211	6.63808		2.57782	3.61036
1.78418	3.18993	5.00108	4.1286	4.75761	3.0926	9.55255	3.65397
2.04741		9.476	3.56219	3.66379	2.54693	4.06923	6.03265
2.77018	7.40689	2.60818	1.90008	3.36847	1.43203	4.83888
1.79175	5.36916	9.7095	4.45357	4.00596	1.61929		4.24185
1.70036	2.78168	10.8845	4.86005	5.67535	1.67681	9.26034	3.91682
2.07393	3.16402	2.49324	9.93774	5.25792	5.84472	8.57024	2.31252
1.6723	2.52298	5.8942	2.74024		2.38585	4.23178	5.26028
2.11556	6.29784	13.8714	3.37052	3.71615	1.52223		4.62733
1.9301	4.757	6.59503	6.99339	3.10136	2.86558	13.7454	9.0134
2.34241	2.83136	5.91725	1.9245	5.06167		5.08141	8.46104
1.60184	1.92176	5.43038	1.85268	3.84977	6.44451	6.86286	11.29
2.22785	2.1962	11.6663	5.8282	6.01099	2.57108	7.88711	3.10901
1.6661	1.49123		2.84753	6.91668	2.56139	4.31602
2.34079	2.33206	14.6823	3.30879		1.93937	7.98912	4.24208
1.8486	1.54736	11.3786	2.71939	12.9765	6.57781	7.68125	8.47916
2.35105		5.09348		7.03864	1.87863	4.12877	2.6635
2.29693	3.2232		2.78562	4.37041		4.27602	2.8131
1.84092	2.65535	7.92511		11.8235	2.22318	7.41311	4.12532
1.69936	2.92596	9.62982	5.15205	4.95433	5.41006	6.89207	5.33798
2.24645	3.59394	7.20437	5.51548			7.77764	4.92224
2.2533	3.72831		3.59021	2.80423	2.489	6.01081	3.61627
1.72927	3.82008	5.35574	7.05073	6.97264	2.60743	3.17762	1.95224
1.56506	4.04884	5.21772	2.10066	3.68204	2.23158	3.92978	1.77437
2.20856	4.74391	3.6966	3.26792	11.8832	7.35753	4.64154	4.74422
1.60207	1.90944	6.18605	2.16552	3.44868	1.67079	3.56557	2.04898
2.60277		8.90739	3.84786	8.25574	6.04555	3.14761	10.4834
3.44798	3.93043	4.33275		2.87365	5.80461	14.4775	3.85683
2.44471	1.95071	2.50411		10.5419	4.17799	2.41791	1.82608
1.49474	9.40218	15.4382	2.64527	11.86	2.96862	8.08764	3.84657
2.90248	5.59632	3.96992		8.57739	2.62138	5.37609	3.22256
1.81425	2.12905	15.4889	4.04812	10.7784	2.62871	3.85462	1.7275
1.68781	1.97672	7.2233	1.61493	3.32167	3.09513	4.89739	3.72917
1.7961	3.75261	5.20834	3.17311	7.09457	5.20643		1.81972
2.36968	3.473	5.60319	3.96101	3.75987	4.65923	13.9819	6.7601
2.47091	3.60254		2.85043	7.90823	8.11359	2.99999
2.23955	9.36732	5.39941	2.58778	10.0558	2.73515	3.02241	9.18927
1.96797		3.42091	2.50406	9.90436	2.95438	6.85071	2.44374
1.57016	9.23015	2.45888		6.64528		3.15338	4.67249
2.37078	1.97304	3.31999	4.38694	4.34622		3.51697
2.29717	5.69606		4.5791				7.61336
1.59366	1.8229	13.2118	3.4351	4.88768	3.87106		2.1649
2.19309	6.39165	2.8971	4.09428		3.65939	5.47575	1.85105
1.92242	2.60137	6.67675	1.40248	4.50298	3.92606	9.11734	3.75832
1.79409	4.65303	3.36635	2.35973	5.79173	2.60606		8.12331
2.08018	1.70309	13.898	4.42227	2.92422		5.93039	4.25443
2.37752	4.14081	4.90598	2.22619	4.59203	5.96339	13.705	2.07075
2.15264	2.12512	3.85143	2.40897	6.01364		4.51315	6.18185
2.21361	2.99775	5.09792	2.03888	6.18311	2.73792	5.17542	7.53915
5.74981		6.14097	3.56789	3.56622	2.5993	4.25034	4.0748
1.70523	2.98453	4.26689	2.25587	7.16978	2.69223		5.68858
3.51227	3.82762	3.63638	1.80698			6.2007
3.65966	5.62191	5.61445	3.94096	2.83451		4.58794	2.24835
1.72156	2.93753	8.89841	1.64268			9.52432	3.64867
2.07858		2.56723	3.5562	9.4652	3.0274	6.26067	3.18167
2.13526	6.24427	3.04552	2.51759	3.96042	2.78636		2.12234
1.84808	8.67322	2.7663	4.09759	4.08841	3.40071	6.06903	7.09285
	1.99046	4.97235	3.64959	4.78514	1.97544	7.8761
	2.71781	14.8162	2.99728	4.38262	2.93009	11.5235	2.55119
2.85718	4.33155	3.04649	1.89231	3.93007	2.68927	8.5767	7.1354
2.03837	3.45949	3.94526	7.54585	4.75652	2.72113	5.08826	2.57979
3.94138	3.13583	6.3285			2.74291	6.40192	3.46751
3.15201		5.3932	6.61674	3.46097	3.57846	5.53328
2.47635	1.81592	2.85612	2.51768	5.05968	6.33928		3.16031
3.4502	1.72546	7.00483	1.72131	6.25914	2.47652	3.86876	3.44877
2.11416		4.12605	3.77395	5.34097	3.44559
2.55377		5.22224	5.56047	4.71124	4.58913	2.94978	6.61734
1.7901	3.38093	9.2532	3.85757	5.35089	3.11978	7.37347	6.01067
2.00298	5.66254	8.32884	6.17061	6.29512	4.73825	3.70203
2.69275	2.92961	3.32347	3.58762	5.17557	3.08528	7.25289	3.55388
3.33423	7.10766	2.63407	3.38969	2.61481	6.22539	12.1899	2.2367
2.65702	5.99488	3.57543	9.10699	11.1902	4.54491	2.48097	3.27234
3.4161			1.96104	2.88291		4.5218	2.26874
2.76589	6.08172			3.27359	3.34605	9.02555	2.01377
4.2562	3.37966	4.64499		5.65017	2.74894	3.54143
5.42293	3.32448	6.87029		4.00519	2.61514	6.48115	4.38441
2.80051	6.5327	4.76697	1.74231	3.62038	2.1867	4.94503	2.13894
2.68852	2.24012	3.99986	1.97786	4.63725
2.91607		6.64208	7.99703	7.56887	2.27253	9.13861	2.74527
3.27222		9.12939	2.47012	4.79251	8.01808	13.2962	4.27235
2.17398	5.39447	9.79227	2.92603	2.69531	2.85847	2.96271	2.52736
2.40324	6.00478	5.2674	4.45081	2.78889	2.5368	4.74239	3.33044
3.21314	1.96313	6.7356	1.75785	3.68997	3.19955	14.3995	3.40335
2.17058		5.17771		6.03078		4.78435	6.5567
2.10913	8.05492	8.39069	4.8646		2.31025	4.69958	2.33067
1.9846		4.66789	3.33882		3.80981	9.45146	2.27665
2.73092	4.91888	7.88622	2.05771		2.45004	2.81723	2.59344
2.49636	2.19864	5.06217	1.72243		2.86343		1.95442
5.73091	5.91893	3.5228	2.38685	5.47676	1.84494		3.33673
		13.0785	1.86283	3.51318	3.26783	5.7272	9.17945
2.63412	2.18702	6.59666	2.70924		4.88918		6.47301
3.38232	7.3383	4.14483	5.06904		8.19542	3.02248	9.55815
2.55482	1.50882	6.77181	4.80933	3.41727	3.12585	7.47232	10.2768
2.8664	2.67398	5.44009	1.84431	4.28143	4.20111	2.61457	3.28993
5.35921		3.81906	2.14154	7.814	6.26144	8.68639	3.9949
3.53501	2.32474		4.60438	4.05956	2.65888	3.32234	5.28686
5.41345		3.66373	3.43895	3.16484	3.87778	6.09313	7.20413
4.43088		6.73715	2.51571	5.09474	4.15761	3.93509	3.91977
2.13631	1.75628	3.05827	2.4157	5.95188	2.63211	5.20399	4.59924
2.99736	5.00121		1.89137		7.12198	6.95657	2.91724
4.06709	6.55092		6.0043	4.53693		8.25122	1.51642
2.39053	4.07251	6.5974	3.05357	5.61218	2.67329	2.93195	5.90547
2.40642	3.68408	6.06194	1.7261	2.97727	2.69028	6.98149	3.02269
2.29332	2.32365	4.32874	5.58839	3.16491	6.99378	3.83098	5.22983
2.07307	2.95998	2.51077	1.75796	3.62354	4.17997	10.6289	4.11928
2.93984	2.44444	4.94018	3.82169	4.89533	2.84228	5.65685
3.05146	1.3806	3.8792	3.9934	4.05932	2.55369	8.59766	2.02604
2.34363	6.83294	2.53574	5.15117	3.07641	2.53664	5.02635
3.3665	2.43997	5.86543	7.94571	3.865	7.11583	6.00529	3.84231
3.59229	1.67707	11.8304	2.51136	5.60332	1.80138	3.17032	2.17175
1.81471	4.49474		3.21158	6.13467		9.47101	5.55628
3.0834	2.40724	6.21432	9.37609	5.4471	5.26523	7.41302	6.56031
3.95792	7.30093	6.04547	5.02276		2.23455	4.49751	4.86596
2.89193	3.83195	4.9078	2.42258	7.9756	5.40982	13.9563	8.84366
7.13905	5.50097	4.8056	3.89579	2.40372	6.8924		5.94238
2.74184	1.74014	3.20029	4.09634	4.58792	2.12028	6.48563	2.7632
3.76023	2.78217	4.20663	3.15736	12.392	2.32376	2.60094	7.56058
4.29459	1.8186	2.84071	1.76096	8.46741	3.05099	5.50647	6.18813
2.5986	2.17981	8.00178	3.47375		2.38511	4.0162	3.39986
	1.90847	3.23429	3.79828	3.36012	2.83125	8.25978	8.79267
2.13414	5.7495	5.25296	1.95659	5.68829	2.28877	3.76402
2.49018		3.75301	2.36872			4.77838	5.08368
4.53048	1.52464	9.57838	6.19475	3.99866		5.91025	3.18301
2.23586	6.02184	3.7817	3.84504	3.63125	3.41809		8.49702
1.52632		4.36823		4.50716	2.7694	5.40549	6.35125
4.30896		2.9024		4.24318	2.01309		5.07707
4.71104	2.97187	5.38013	4.62199		7.98075	9.02658	3.88808
6.15188	9.35031		5.7858		2.64042	7.45071	3.04526
2.70753		5.37953	3.55299		5.84393		5.09917
2.46219		8.44307	3.56203		2.90203	3.05829	8.71762
2.66856	3.00185	6.27769	4.33876		5.47227	6.07671
1.64878	3.53799	6.29662	2.27504		2.53127	5.67232	4.99474
5.21054		3.86756	1.83994		3.18929	11.2387	2.00603
3.10969	2.27026	8.74977	2.29299	4.2254	2.49216	3.26642
4.93016	1.67689	4.06641	4.6258	3.57196	2.92762	5.11839	2.74676
2.86397	5.09074	4.04912	1.61946	5.25509	6.29007	13.8495
6.78224	8.21606	13.5108	2.51802	4.95624	3.30345	10.0492	6.45044
4.1713	4.72858	3.55169	3.06392	7.99054	3.30654	3.44987	2.8614
2.32616		4.26622	7.52044	13.0367	2.78907	13.4043	6.34311
2.43532	2.7837	3.40098		3.07947	7.32202	4.5152	6.77341
2.97796	2.15973	6.24713				4.63503	5.89802
2.18301	4.4379	5.93173	3.99767	7.44839	4.23156	3.25085	2.09906
3.24928	2.97333	11.589	5.18875		2.45393		1.42175
2.8289	4.67139	6.03125	4.54043	7.46396	2.25768	5.61571	2.73267
2.50321		4.34893	4.59363	6.07056	5.88407	2.60165	2.41956
	2.12413	3.21533			6.37725	3.12659	6.57796
2.51263	2.75733	3.14996	1.73871	7.81506	3.18902	3.16208	7.15991
1.73946	3.30847	6.53012	2.633	6.67755		4.19879	5.95103
2.97476	1.85992	8.59306		6.42123		7.34596	9.42424
3.57461	7.52588	9.58786	2.76603	6.10629	2.64996	5.27921
2.22943		7.11398		6.10805		7.99504	2.47098
		4.20049	9.65783	4.18906	4.51216	10.0058	6.93426
		3.8162		9.62823	1.70632	9.98083	2.17896
2.83847	6.10494	3.3117	7.52114	3.49944	2.61444	2.70901	5.72151
2.28702	5.99534	3.69218	7.99598	5.73407	1.82007	7.97691
3.73421	4.24868	10.7451	8.15867	3.65515	2.63	8.812	2.66995
4.05183	3.13046	10.5424		4.42052	4.95087		8.093
7.63736	3.97802	11.5159		4.28022		8.31963	3.29638
3.21898		8.82974		6.40929	6.83432	2.65006	2.36354
5.47014	8.57189	8.106	3.89428	6.57616	2.40636	5.31512	1.72079
4.03386	2.16545	6.35317	4.17657	5.53299	3.15247	13.8808	7.57777
5.51654		12.6192	5.28239	6.65431	4.14354		7.50014
5.855	3.90194	5.59909	4.8557	4.41976	2.08028	7.02301	4.55247
	4.37691	7.74278	8.37607	12.4947		5.94888	2.37968
3.18869	2.50917	5.42629	7.73927	4.1331	4.14116	2.74834	4.12834
1.89836			5.24968	6.2384	2.38578	6.38635	4.26057
		8.25081	4.08699	2.78954	4.76588	3.33549	2.59978
		5.15373	3.02795	3.00248		4.25688	5.00002
3.24073	3.39207	4.54633	5.80914	6.67605	4.44009	2.77841
3.82176	2.07557	13.1607	3.82457	5.00568	3.90313	6.06	2.33845
3.52979		4.93056	2.89459	4.40173		11.0239	2.78028
	5.8657	7.13992	3.28661	3.39267	4.24984		10.5262
3.16136	3.03093	2.80468	3.02618	3.93314	2.95068	5.05162	2.44335
2.31199	4.21284	13.7658	8.50314	6.03597	2.68459	3.362	2.38341
4.0491	2.64293	13.8996		6.49447		3.81271	8.08321
2.64114	3.20198	8.09064	2.09863		8.27827	5.95626	4.7629
3.71283	3.77967		6.54031		4.44376	14.0552	1.676
4.36907	3.04508	4.5542	7.28687	6.54694	2.27786	3.43092	5.21484
5.77681	2.79112	10.391	2.08719	3.65518		7.65327	7.61869
4.71982	3.14095	4.19658		3.14975	2.35873	7.53747	5.5665
2.32941	2.10397	3.77727	7.0181	6.64293		4.41228
	2.45087	6.27475	2.46863	3.18616		3.21782
3.09917		5.55023	3.29576	6.32637		7.5128	5.57268
2.67242	2.08326	3.76467	3.99156	5.54105	2.57177	2.61187	3.75507
4.33966	2.72919	13.3866	3.17379	8.09683		6.30209	7.36469
2.77156	2.70966	7.84837	2.30127	5.3822	4.46507	3.52036	3.71932
2.91605	2.19428	8.87955	2.99727	10.788	2.535	7.04394	3.76953
6.26355	4.22568	6.51381	1.985	4.47592	2.68629	5.30174	2.57896
2.67798	2.97034	2.84041	3.48457	7.74777	4.09053	3.43846	4.97848
3.19031	7.10068	7.71948		3.64598	2.57426	4.48386	5.73131
		4.6176	3.6563	3.88562	2.99084	2.75543	3.80559
	2.77052	3.51357	2.79823	3.8931	2.92206	3.55917	2.36637
2.15062	3.35617	5.83813		8.14043	3.10215	3.70874	2.32512
7.55492	3.14845	9.51797	1.67131	4.2016	9.06169	12.2979	2.62795
1.60639		12.2532	3.36185	5.50107	3.6516	13.7551	3.62073
6.25249	4.65149	5.34571		4.8727	4.8355	6.84361	3.31042
2.09135	4.50888	4.10457	2.25311	8.45615	3.21457	3.4029	2.19472
2.78132	5.74847	3.74432			3.50348	6.27426	3.84906
2.74889	2.99905	4.43076	8.26625	3.39577	4.01581	4.6959	6.19534
1.75731	2.44278	4.02794	6.73799	3.56265	5.71922	3.18815	2.48034
2.01923	2.53319		1.80595	7.45937	5.76904	2.40645	4.13181
3.95461	3.723	3.99556	3.73296	5.593	5.01558	5.45053	2.78351
3.40845	4.33798	3.21509		6.29564	2.53666
6.21884		3.45951		3.55029	2.67623	5.38523	2.34665
2.42553	2.24776	4.3171		2.85991	3.58914
2.67275	7.05573	9.19593	4.95589		4.81055	9.96189	3.03346
	2.74179	11.4675		5.13858	6.6552	4.3168	6.19166
	4.52014	3.96459	3.42574	5.32787	2.76372	5.52135	4.91202
6.78337	3.7957	8.98585	9.10599	3.43478	3.46297	4.35986	3.26611
7.67727	2.09994	14.2341	3.73944	3.13454	4.77786		2.24197
5.71449	4.94028		4.79895	8.19717	2.51931	4.15504	4.60385
6.05061	3.26199	5.64516		4.0184	2.72952	2.55646
3.19179	2.1696	5.58665	1.84174	3.11028	5.92332	4.41166	6.46539
	4.5737	5.67417		7.39664	5.00102	3.76634	2.41252
1.86599	1.90582	8.40247		3.54987	4.92537		2.47161
2.49538	2.56064	8.93857	9.47888	5.11009	3.17891	3.93042	3.71742
	3.45532	5.01286	6.93343	6.6051	2.22568	3.4249	2.75629
		5.69447	7.27467	6.73482	2.60165	10.5442	3.00023
2.095	2.4406	4.98491	1.51779	4.73886	8.8218	2.82208	3.87392
1.97948		14.6127	2.32021	3.38303	5.2094	14.4212	3.18227
	6.60706	6.25809		7.50697	4.38029	5.32723	6.07433
	2.57532	7.47116	2.33144	2.44781	4.37427	12.3532	9.06455
5.55222	7.82481	3.44631	2.03151	4.28021	7.1924	9.02727	3.06593
	4.34406	9.68297		8.63072	2.50352	9.89523
4.20255	3.54254	5.23492	2.22055	2.62716	6.71252	2.72428	10.3983
1.85814	2.63232		2.27309	2.6394	3.71579	9.18176	5.17835
3.53036	2.59575	2.89095	5.89198	4.82841	2.50339		4.19684
		3.65754	5.43982	4.26273		4.60892	2.69083
1.78262	2.12724	4.18874	4.84839	6.27176	4.8441	4.39783
3.32562	3.95078	6.77718	9.74904	4.72882	2.49182	4.66217	2.48238
6.94089	2.1947	13.1372		9.83034	4.03917	2.77548	6.81081
2.40721	2.44766	15.7705	2.20613	3.54706	2.27621	9.3447	2.43507
	3.7411	6.69296	3.91302	8.24081	2.7652	11.3255	6.17647
3.23314	8.9324	9.29355	2.25386		4.1908	4.58517	9.14891
3.55421	3.00114	4.13229		6.48187	2.96921		2.34732
4.50122		12.0931	2.17937	4.27925	3.94138	7.40141
	3.03339	5.27112	2.44401	6.45334	5.65245	4.75684	4.41105
2.43318	2.38884	10.4089	3.88301	4.435		14.5132	7.96098
3.79674	2.70836	4.36713		8.88748	3.74109	4.73581	2.54894
	3.70774		4.71422	7.30383	2.98961	7.43514	3.05201
6.64697		6.48974	1.54936	3.11214	6.99275	4.24701	2.22292
2.41927	4.79047	3.70801	5.10172	5.13791	8.68416	7.84958	7.90723
2.14389	2.87102		3.60163	7.83815		6.00275
1.80663	3.81148	5.10775		8.22754	5.85767	11.956	3.21142
3.34984	3.06732	3.87219	3.65604	7.85916	6.06189	3.17248	10.0399
	5.30174	2.7971		6.37993	3.87399		5.00035
2.3992	7.16405	5.96838	7.80386	3.16599		9.98914	3.39937
1.63856	3.31665	8.6454	9.72231	3.205		12.9894	2.70784
2.66725	4.26447			5.38556	3.15298	4.72082
3.12302		13.5402		4.7101	3.75331	8.01004	5.2013
2.94827		14.447		2.77238	5.12004	5.16852
	1.91267	6.08052		3.54584	1.83333	3.87294	2.29532
	3.65614	8.92044	2.00648	10.9404	9.30259	6.77321	1.73502
3.88594	4.1794		2.78868	5.5206		6.90327
3.73137	3.74963	2.80917	8.24041	2.82091	2.54265		2.99023
5.91805		2.19298	3.03342	6.10262	2.79938	6.8167	4.61422
	6.62254	10.9853	2.05894	4.09465	6.59097	10.3219	4.76703
2.53614			10.0181	4.1633	4.34382	11.0443	2.77251
	2.16742	5.09274	8.80843	3.99055	3.00042	8.53661	2.75047
3.91267	3.61748	9.57068		3.20973		9.99162	2.50203
7.46918	3.41493	8.02472	4.38908	3.31943	2.89638	4.68372	4.67037
2.53387	2.6242	7.42709		5.16941	3.64951	5.04046
	3.90161	11.6143	6.49104	8.25105		6.11784	3.09071
		3.18616	5.83253	4.59384	6.37225	3.9669
6.06821		7.04674	2.04668	3.66739	3.96994	3.75729
6.95668	7.02091	14.2534	2.89084	4.90546	2.2956	7.91586	8.68233
3.34746		9.2525	6.72542	11.8805	2.72431	10.3457	2.60199
1.9818	4.02599	7.28653	2.55039	4.58839	5.64609	5.38354	1.46937
				4.35881	8.3396	13.095
3.63121	2.36348	7.03703	3.01583	3.56747		3.49323	3.09396
3.23048	3.93997	10.4652		4.78247		4.32169	2.97795
3.38541	5.7352	6.44139	4.21457	2.9165	4.33365	7.43286	10.8311
1.75655	4.42609	7.54208	2.57809	6.30221	3.1767	5.35394
1.73648	6.52601	5.71065	3.17714	8.84385	5.38547	5.5817	7.29344
2.08597	2.26243	5.60721		4.11884	4.91417	7.15047	5.43069
	3.03519	10.1983	4.83994	2.31366	2.06373	4.79865	3.80032
3.06488	5.21611	9.92543		7.80011		3.40633	3.99988
2.72306	2.40773	12.0155	2.51562	4.61865		4.14695
2.00224	3.19308	4.00311	4.25555	10.0247	6.60744	2.88007
2.32968	2.94333	5.41452	4.38792	8.04783		10.2346	1.61125
	3.0026	12.9803	7.77476	2.70333	2.22603	5.94991	3.41264
4.27865	2.65295	7.45018	4.67761		2.57585	5.40864	5.68295
1.98509	5.04881	9.34309	5.10466	11.8529	2.58225	5.23414	5.10281
	1.97104	3.36572	1.97568	4.09657	5.60948	5.85468	6.90622
	6.92539	12.4233	1.65668	12.9855	1.63399	9.9845
2.68312	4.34129	10.8111	2.47735	4.10895	5.52396	12.9746	2.87315
1.93746	6.89839	7.43509		4.69525	5.20218	5.90486	3.7552
	6.28076	4.27115	3.21412	4.11487	1.94176	4.49846	10.4825
3.40264		11.1564	6.49722	6.03403	5.91195	9.50064	2.60081
	5.07755	6.57654	2.74043	4.02454
1.86077	8.72089		3.42234	7.94972	2.54167	3.73686	3.85222
4.87877	2.08801	10.0377	1.95647	4.75504	7.31726	3.10883	2.29681
	9.2729	11.6684	5.53204	4.33796	3.0777
	3.34825	3.32141	5.08677	12.8395	4.62188		1.76006
		6.77798	1.8978	3.46627	5.82716	8.10092
1.96025		12.6444		2.62001	5.4584	2.90334	3.3069
3.94833	2.65596	9.6279		4.15397	6.3531	3.45703	4.51492
2.49954	2.21193	3.91975	8.90601		2.53969	2.6596	1.67307
4.95451	2.06113	13.1159	2.46666	3.21005	5.79352	4.88091	2.12778
6.3168	6.72757	9.4332	2.74678	5.26158	4.938	10.6924	3.1292
	3.29947	7.97937	9.34148		4.6366	6.95768	3.45531
1.55449	3.50094	8.10492	2.92038	2.57988	2.46806	2.94696	5.8728
2.32421	7.05309		2.44833	4.87235			2.33525
1.93626	3.88205	6.41068	3.31152	7.09816	2.08579	9.11423	8.9265
3.58041	5.15865	7.02486	5.86658	6.36814	2.55685	3.46176	2.4371
2.49829	2.42232	16.0237		3.04042	2.52447	13.3569	1.64743
5.65353	4.10187	3.60027		6.89507	3.03745	4.43201	3.89384
3.97241		4.48399		5.37985	5.80195	3.44077	2.62987
3.75243	5.58823	13.1377	1.986	4.18578	5.86448	13.1169	4.39796
2.8266	3.75432		5.41648	3.96556	4.36523	4.28261	6.94104
2.47041	5.27915	6.64471	2.92754	5.34978	6.51399	5.36699	2.32328
4.1315	2.28484	14.2109	3.42046	2.91039		8.41499
2.10845	4.57183	4.81822	3.50139	11.1637	3.18187	11.7557	3.06311
2.44745	2.82738		2.47718	5.53311	8.93834	3.57031	2.98555
7.16103	4.57714	7.43355	2.20587	5.56877			2.58299
2.74423	4.06154	3.52644	6.42461	8.21834	2.74341	3.42892	5.37938
7.29807	3.80927	7.44301		4.09229		4.27663	2.79308
4.9171		7.71623	2.5288	3.11523		4.69579	1.90717
1.84256	3.25027	3.86209	7.57123	2.63368	1.95508	3.38509	2.62359
6.51385	3.45243	3.46059	1.70314	3.01114	6.11147	3.9385	3.69067
2.07617	5.13962	11.2854		3.03706	2.20272	4.56003	2.933
5.35977	4.02111	4.72487	4.6549	3.73341	2.54478	4.55402
3.80482		4.65248	4.36079	7.52339	3.47273	10.165	3.72991
2.37309	8.06075	4.29846	4.6762	4.62465	6.58878	4.91499	2.71292
1.43474	4.80767	8.5554	3.43544	4.37796	5.40662	11.585	2.58797
2.73949	4.84483	6.88419	7.59035	7.71426	6.13013	12.4006	3.05945
2.20808		7.7635	2.46294	5.86804	5.59846	3.34713
1.8687	5.94812	8.04985	2.08256	8.20312	2.57967		3.12502
2.39754	4.01036	4.84352	2.61848	6.12917	2.81875	10.108	2.27208
1.79921	6.43883			9.03292	2.07869	3.97862	2.60324
2.48611	6.17761	5.13631	1.91504			3.61433	1.83025
2.04543	7.24883	7.06697	1.43229	6.34268	2.80453	10.9527	1.59673
3.24302	2.24751	6.56577	5.06918	2.98898	2.55446	6.63855	4.6476
3.55438	2.4309	3.56065	4.3446	5.44637		7.06424	9.61227
2.96165	4.77806		6.81084	4.52618	3.30731	4.57153	2.96355
3.86578	5.48856	8.32043	1.70019		2.85023	3.84514	2.79525
[truncated: 3,823 more rows]

## Sheet: Figure 4C
Veh	Veh+I	HF	HF+I	3610	3610+I	0357	0357+I
0.768581		3.05849		1.34344
3.73408	2.13696	7.14174	2.23358	4.32693	0.856631	4.54314	3.51889
	1.22446	3.49631	2.60009	5.22114	3.11713	4.83226	3.30174
1.46087			1.64001	3.30039	2.95279	4.09058	2.52071
1.54599		4.1159	2.02793	4.24986	4.12912		4.32006
	1.3207	1.69323	1.93633	5.40181	2.1846	5.60345	2.49853
1.29693	2.60082	8.82096	2.00976	3.59981	2.18835	2.38742	2.8779
1.45288	1.60482	3.53812	1.80538	1.95923			3.0136
0.999374	1.95276	3.5713	2.67805	4.4781	0.994121	5.65998	2.93278
1.09168	1.43136	8.25461	1.19511	2.882	1.62618	5.60267	2.35997
2.40887	2.3412	2.70372	1.64992	5.09683	3.10308	4.08196	2.86041
1.03512	1.71783	1.92117	2.71642	1.74255	1.16482	5.05911	3.89767
		4.04208	4.11515	1.49487	1.28217	2.73959	2.84718
2.53402	1.22734	7.84501	2.63109		0.748356	4.52826	5.35683
	2.04716	5.97977	2.07773	2.96262	3.775		2.55631
1.22997	3.15072	2.86224		1.22979	1.27705	6.1766	2.31027
1.10422	1.68833	4.7302	1.79078	3.00819	1.06073	1.65761
3.03759	1.38134	2.14468	2.62456	5.17531	1.6761		2.95071
1.64324	1.76303	5.05405	1.50263		1.24793	4.10068	1.60176
1.2471	1.85418	6.86771	1.63831	2.00193	1.39029		5.70252
2.55747	1.27535	1.71151	4.14	3.90179	1.15283	2.77818	5.19999
1.39425	1.65033	1.71443	1.10209			5.74782	2.85857
3.90631		3.13198	3.13544	1.7675	1.1048	3.01438	2.06803
1.38964	1.78561	5.89837	1.47475	3.57059	1.31564	3.62272	1.79913
2.23623		3.59616		7.34569	1.38365	2.14523	2.75432
1.90553	1.71461	3.6204	3.09543	1.67564		3.1217	2.6396
1.49197	2.90639			4.28214	0.877052	3.09889	3.73074
1.41013	2.55812	3.92687	1.31578		4.62275	2.81536	2.20024
1.48703		4.67754	1.88106	1.37507	4.89089	2.64549	1.83867
1.38894	1.13214	4.08776	4.90792	4.9353	1.48237	3.57151	4.26963
4.16287		3.96714	2.82812	2.80481		2.82164	2.16419
1.52229			1.17859	2.13907	1.50868	1.50432	1.29071
0.924789	2.78438	6.59553	2.16572	5.296	1.41823	3.94058
1.01972	4.82581		2.30409	3.09985	2.69316	1.48492	3.24237
2.79371	0.930862	6.2353	2.08836	4.8734		8.07351	2.82304
3.24186	1.85308		2.80311	1.70224	3.10015	3.79452	2.93212
4.51629	2.01099	1.71268	5.29092	1.44263	1.27138	2.51858	1.62566
1.13056	2.47474	7.33189	4.78483	1.58661	1.58784	2.58417	2.36588
1.20635	1.2709	1.89631	2.44269	4.52565	2.05841	3.65828	2.88825
1.72324	2.57214	4.02523		6.09685	1.64301	5.35349	2.4733
1.0533	1.80369	1.35985	3.52182	1.78597	2.49776	3.09557	2.69352
1.29022	1.49442	1.64632	5.58779	4.81729	2.2178	1.9948	2.25694
4.50283	5.01419	4.45851	1.42417	3.01353	2.57541	4.95352	2.85855
2.24972	2.80018	8.02129	2.66686	3.76156	2.54317	1.61096	2.94913
	1.56496	7.71476		3.99304	1.31585	1.72455
1.05865	1.32077	4.11732	2.35258	6.27959	3.20076	8.20368	1.76188
1.03478	2.46693	9.58503	1.70739	3.32563	3.75198	1.33827	2.72894
1.68487	2.36994	3.22155	1.56627	5.02139	2.11743		2.00325
1.00136	1.42864	2.28179	2.30082	2.32611	2.06018	2.34236	1.68951
4.36394		5.5258	4.03577	2.12292	1.37953		1.77378
	2.0542	4.38888	1.89165	2.87433		8.64998	5.72154
0.742486	2.54415	1.69369	2.25977	3.80082	1.34201	1.68519	1.57123
0.935479	2.15461	2.18862	1.63256	5.21135	1.3696	3.91192
1.51591	3.86211		3.30504	2.54265		2.85457	1.84261
2.81916		3.4556		2.09694	1.45783	3.78335	3.41949
1.71868	1.2403	7.22875				3.6277	1.60208
0.955576	1.14069	1.3219	1.67227	3.19608	3.7045	8.36986	2.24719
0.794143	5.12335	7.29252	3.95417	2.34768	2.1529	1.69538	1.02552
1.39111	4.98409	2.66217	1.84369	2.55198			1.70581
1.49433	1.23225	3.09454			1.06831	5.75183	2.34494
3.29126	2.5317	2.83008	2.33444	4.58563	1.77749	5.24702
3.32839	3.39766		3.18488	2.58124	3.131	4.25584	1.90252
	4.38213	2.95658	2.47907	3.34526	5.02467	3.54205	2.53349
1.45062	2.13911	1.57253		3.88192	3.27672	2.65173	2.61163
1.68956	4.51391	5.26946	4.65842	3.18675	1.28161	5.27299	1.99286
1.34874	1.26526	6.32701	2.15546	3.9467		5.81473	4.55331
0.96985	1.72852	5.62479		3.9258	2.56268	4.83385	1.90085
0.887861	5.1229	8.09285	1.63229	1.77364	1.60344	3.21214	2.30108
1.38909			1.55969	2.67263	1.29101	7.22499	2.36138
1.49819	0.989131	5.15684	1.08865	5.83493	1.4319	3.24041	2.11486
3.19292	1.27398	4.20865	2.03784		2.83058
1.40152	2.39737		2.82063	1.60143	1.30173	1.37876	2.19755
	4.24942	2.62576	1.6041	1.51787	0.909322	7.38362	1.129
1.08574	2.46578	4.51095	2.07986	3.58082	2.87789	3.36048	1.7199
	2.76223		1.62477			1.70401	2.22987
2.62813	1.15016		1.72149	2.07086	0.954547		2.34925
0.944786		7.56933		2.56528	1.79289	6.734	2.0934
1.86531	1.17074	1.6587	1.41472	3.37724	1.40407	2.29223	3.33082
1.16064		4.61445	1.50591	4.57523	1.39813		1.92539
0.942318	1.17667	3.95809	1.53143	1.65394	5.27008
2.107		2.89717	3.24787	3.48237	0.871126
1.10945	4.23015	6.91298	2.46602	3.81315		2.87343	4.16059
1.41093	3.86829	3.40951			1.13733	1.8936	1.88539
1.15802	2.91634		2.04865	3.44719	0.822341	8.06586	1.73702
1.19674	2.99998		2.11235	2.00516	2.31893	1.75202	1.83271
1.34121	1.76944	5.94153	5.26923	5.01665		3.47967	2.32429
1.55447	1.83435	1.55104	1.77535		1.77293	3.12019	3.40965
0.967042	4.96308	2.9916	3.23032	2.56457	2.85629	3.05481	2.80096
0.747554	1.42849	2.34687	2.01812	3.39919	1.31385	6.42115	2.38364
1.28299	4.31704	5.19676	1.33192	2.31445	5.08981		2.16025
1.10052	2.5585	1.37921	0.971835	2.92847	1.00187	7.0424	1.18168
1.33393		2.83693	4.68549	2.75467	1.37451	5.03392
0.956135	2.43096	1.96604	1.12405	2.40126	3.25891	3.77552
3.99891	4.07361	1.47891	3.12597	2.39386		4.05692	2.42391
1.30148	5.12534	1.87677	1.48037	3.8641	1.06593	3.27804	2.57292
1.01052	2.27008		2.09274	6.56367	1.672	4.53941	3.41698
3.99765	2.33827	7.55625	2.24512	3.66832	1.07686		2.57917
1.04986	1.27122	5.16374		4.4152	2.96301	4.64095	3.04074
3.49995	4.76169	2.09376	2.00071	1.79265	3.80015	5.20908	1.89454
3.71137	1.24809	3.07385	1.10225	1.53953		4.92581	2.25571
1.46491	1.51524	3.82255	1.66364	2.3873	1.7606	3.30016	2.12177
1.37148	2.99456	4.92461	3.16876	2.36681	1.62517	3.15929	2.04666
3.1561	1.66648	3.21899	1.71769		1.07384		1.54171
3.06744	1.58858	3.75661	0.954808	3.09098	2.72262	3.90768	4.76424
0.947223	3.03248	5.55928		1.9094	1.21729	8.29826	1.90083
1.68761	3.59032	2.95119	1.08913	3.43623	5.27127	4.54898
	2.11404			2.11967	1.84606		1.71314
2.42822	1.59135		2.49974	2.43708	4.79355		3.34233
1.86867		2.20034	2.42623	3.0218	1.72645	3.01917	5.03756
2.82088	1.76376	2.47471	2.30279	1.63876		2.8591	2.74568
	1.56647		1.5519	3.40529	1.58524	2.28088
2.35074	1.1243	1.69103	5.63303	2.84683	1.77166	7.13245	3.80463
1.13668	2.10886		1.17458	4.29279	1.99863	2.73954	1.29026
4.54828	1.15635	3.52099		1.93644	1.35086	6.96047	2.03448
1.11934	1.0921		1.7923	3.73462	2.20103	1.65217	1.52685
3.99729	1.63383	6.25243	1.49249	2.65891	1.82316	2.26038	3.37224
1.45801	2.78695	1.4993	2.85975	5.88533		2.33191	2.83173
0.920025	1.30288	5.71384	1.69634	2.2704	2.91019	7.06744	2.47493
	2.71368	4.02106	1.64045	5.67114	1.29697	2.37467	2.23926
1.89137		7.66782	2.21104	3.63194	1.22759	5.33682
	1.24715	5.21393	4.38241	1.72702	2.83787	3.27733	2.35741
1.18034	2.96965	5.55159	1.00606	2.91923	5.42626	2.46745	2.68401
1.36962		2.76345	1.73091	1.73171	0.894593	2.61164	2.79426
1.40498	0.780078		0.924308	3.41387	2.15354	6.03127	2.72395
2.83466		1.74959	0.951683	3.96846	4.78182	4.70111	1.83072
1.20095		1.76638	1.56885	3.10323	1.17613	2.8553	1.91744
	2.36579	1.5307	1.72371	2.32531	1.79236	3.35201	1.36965
1.69749	1.32354	2.20986	1.34958	1.20809	2.23705	2.49637	2.61368
2.69005	4.36558	2.61477	1.18053		1.90899	3.57164	1.85632
2.02702	0.818906	1.49594	3.79714		1.93572	4.13962	4.61993
1.16205	2.77559	2.32259	1.05713	2.05291			2.61113
0.947348		1.54011	1.99118	1.85031	1.98924		1.3916
3.0331	2.33532	1.70443	2.02804	2.46029	2.21128	2.7276	2.86629
1.82641	1.5949	2.27096	3.378	5.34243	2.44116	2.11545	1.70319
1.74398	1.07251	1.97211		4.33531	2.17949	2.15883	2.48541
1.31782	3.52988	2.19218	1.55793	4.39202	1.40097	3.72899	1.37917
1.45103	1.43615	3.04977	4.16822	2.21856	2.0943		1.28972
2.75914	1.64061	1.7971		5.24795		3.18044
2.25633	1.22155	1.68426			2.38684	4.05238	2.24831
1.55839	1.88442	2.80071	2.19812	2.26544	1.45907		1.50647
1.05578	4.33379	2.04754		1.30182	2.63293	5.33697	2.08199
1.86052	3.29035	1.60705	3.067		1.76436	6.09267	1.58588
2.01264	2.81165	2.33447	4.8209	2.24993	5.07048	2.46598	2.91261
1.37069	3.4994	1.83493	2.44198	6.3942	1.41824	5.39147	2.3102
0.757592		2.01201	2.47476	2.46292	0.873266	3.05097	2.45174
1.40094	2.75932	5.12997	1.99348	4.94673	2.05561		2.41104
1.1233	1.56698	2.66268	3.26599	2.37501	1.65608	3.41852	4.16022
1.12512	3.03249	3.13256		3.14067	2.26684	6.52723	2.96334
3.79478	1.29016	2.06811	4.12722		2.89505	3.09058	2.63609
1.64735	1.1854	2.75277	2.88174			8.23328	1.97085
2.90876		3.84499	2.37196	1.53007	3.64293	7.62008	1.69998
2.87089	2.82268	3.10538	2.38652	3.0339	2.18382	4.597	1.91503
1.04039	2.38428	1.66729		5.4172	2.73306	3.6111	2.74191
1.3249	1.25316	1.46459	1.57421		4.10057	5.78634	1.40474
1.66913	1.19634	2.00793	1.71307		1.47792	2.07936	2.93071
	1.08437	1.47532	3.62639	2.74067		4.35118	1.89879
1.03287	1.80021	1.31821	4.18243	4.12053	2.08301	6.04724	2.60466
		5.26012	3.476	4.22332	1.59591	1.16471	4.4009
1.96122	2.28586		3.27853	6.66754	1.4436	3.17458	2.88593
0.932736	1.62647	1.84468	1.51111	3.79781	2.41577	2.1792
0.77128	2.14433	6.68855		7.4142	2.30268	2.60663
1.9853	2.42852	2.20824			1.75929	5.34123	2.0745
1.10452	2.29708		1.82439	1.67465	1.75617	2.02892	2.36371
1.4161	1.51808	3.22016	1.35679	3.22255	3.30002	7.81049	2.40457
0.981479	2.01345	3.1244	2.84716	1.95207	1.90063	3.32156
	0.908124	1.38494		5.10004	1.22308	3.63943
1.0502	4.09257	3.10353	2.79679	5.77024		3.24284	3.07079
1.16255	3.7005	1.92031	1.65625	3.90675			2.971
3.30082	2.10158	5.39264	1.97685	5.08612	1.38128	1.54555
1.29573	5.06268	6.27941	2.28348				2.71099
0.952276	0.80602	1.97574	2.43621	7.50229		2.90215
1.18901	3.62804	2.46721	1.83919	5.27194	1.57239	3.74112	4.8998
	2.94248	1.60455	2.57024	4.26102	3.02193	2.73942
0.834097	1.2831	5.0264	1.04049	3.42433	1.12208	2.38008	4.11055
1.1948		3.00444	2.78269	4.12266	1.63814	8.11754	2.9473
	1.75027	1.42066	1.38063		1.56284
1.78758	1.80657	1.44182	1.76066		2.75824	5.06134
1.31871	4.5116	1.86393	3.09276	1.68357	3.06318	1.84058	3.19759
0.870463	3.15905	1.37366	2.18932	1.58125	2.46006	7.80475	2.40112
1.03473	1.26308	1.28848	1.46361	2.55436	1.32281	1.80451	3.54369
1.7707	1.45873				4.92803	3.66636	2.79245
2.15056		1.93504	1.70327	6.55131	1.77701	7.31213
	1.12526	8.08393	2.93948		5.39121	6.53469	6.1111
2.07012	1.70596		1.37301	1.52157	1.0109	1.96372	2.69523
1.65215	2.39387	6.9808		3.09095	3.23765	2.23466	4.5592
4.35089		1.93044	3.54594	4.99336	1.45869	2.64544	3.68923
1.20459	2.98461	5.67381		2.81014	1.65892	2.97914	2.52919
2.16174	1.67911	5.85963		2.51388	3.99508	3.07247	1.94084
1.10286	2.32939	5.67487		5.02304	1.59727	2.37954	1.01222
1.96539	2.21052	4.27914	1.93944	1.4091	1.39657	2.54794	2.10945
1.79168	1.62		1.53969	4.64786	1.98755	5.28227
	1.98625	4.54997	1.49889	3.48494	1.21813	2.62546	4.1911
1.30186		2.81318		4.22234	1.35381	1.78399	5.23563
1.3464	1.06468	6.17665	2.41408		2.15208	3.66623	1.11156
3.55437	4.26398	4.35505	1.84594	6.25671	4.97337	3.49603	2.69124
1.89936	1.09938	1.53801		3.08417	3.74872	3.12439	1.2451
1.49519	2.56117	1.80336	2.70585	3.9312	1.48592	2.44409	0.816029
	3.64994	3.02151	2.23802	1.71847	1.93767	4.36381	1.35071
	2.44034	4.19174		1.97434	3.13475
1.46217		2.98742	2.22713	2.26893	1.8115	4.33919	0.918754
1.51843	2.18094	4.53041	2.4541	2.82733	1.79576		1.01428
1.71573	3.17316	3.51413	2.73955	2.62314	2.16341	2.72105	1.08534
2.28484	3.21992	2.9171	2.60743	3.96852	1.94332	3.80923	1.19411
3.28952	0.928546	3.25794	1.85078			3.87503	1.52979
1.9998	1.17915	5.19152	3.06492	2.20532	1.73898	2.62761	1.64211
3.72986	1.02415	4.70493	1.8436	3.86245		3.4564	1.56959
1.95764	1.33434	2.92119	1.1223	2.902	1.62044		1.46421
1.47207	1.00249	5.52047		1.65086	1.92395	1.80759	2.89501
1.52341	4.20797	2.00545	5.13963	1.52094	3.29691	1.5966	1.50515
		3.72409		3.42596	1.52654	4.44546	1.31663
1.49647	1.99177	5.52142		2.0649	1.58716	4.10183	1.8385
	2.70393	7.72869	3.75323	4.19862	2.19183	4.76077	1.03426
1.11559	0.859661	4.5546		2.69804		7.04475
3.31394	2.25923		1.32998	2.14413	1.31529	3.5493	2.11783
1.61076		4.038	1.39845		2.30256	1.86614	2.52236
1.4095	3.39544		2.8828	3.71435	1.74539	2.7611	2.27629
1.04297	4.67668	2.07954	2.60125	2.10933	4.47469	1.95858	0.754022
1.03657	2.65735	5.93945	1.99839	3.49587	1.99818	1.88711	1.38877
	1.50839	1.67729	1.90274	2.39688	1.67508	1.76438	2.83557
0.962289	1.31449	3.43845	3.58679	1.94413	2.15947	2.09102
3.05895	1.66835	2.66008	2.34306	6.38659			1.68112
1.92946	2.26458	9.5908		3.36709	1.85052		1.86606
4.00938	1.10199	6.30163	1.74255	3.07969		4.03228	1.2742
1.2654		6.51473	1.74782	3.06265	1.39611	4.40695	2.19974
1.5434	1.91982	2.58674	4.75764	3.45138		1.63708	1.20908
4.57229	1.03428	4.8228	1.81244	1.51344	3.98702	3.51548	1.85834
3.30582	1.8585	3.87133	4.5201	2.08676	2.13092	4.49125	1.13287
3.06212	3.76008	5.45305	3.23143	2.76986	3.23974	2.53376	3.52267
1.46968	1.07226	6.26292	3.68001	4.50246		3.66899	1.87148
1.45113	1.45167		1.90326	4.31702	2.3692	2.77065	1.86334
2.68305	1.34717	8.57432	4.06254	4.84938		2.03444	1.85275
1.69956	0.991699	2.19568	2.42065		1.25573		2.23008
1.07421	2.23318	6.31223	1.86148	2.5725	2.27916	2.12113	1.80291
1.51055	1.28416		2.5294		2.09076	6.57653	0.892679
	1.64745		2.1012	2.80239	3.2823	1.65059	1.38883
	1.76874	3.53724	2.22569	3.74772	4.5511	4.50809	1.95146
1.90114	1.17233	3.96267	2.77985		3.04939	1.54037	0.999288
1.37613	1.61836	2.62766	2.23639		1.27342	3.98913	3.27727
	2.53153	3.39489	1.54199	2.04987	1.02493	2.26359
0.728027	2.86263	1.81161	2.55919	3.58198	0.976014	6.31116	1.90181
1.75047	1.77323	1.39156	3.38116	1.8724	1.56496	1.61444	1.39216
4.00871	2.19393	3.99199		1.55957	1.9866	1.77422	1.73861
2.51105	3.48604	2.63749	3.13682	3.33218	4.60365	3.12104	3.19472
2.12129	0.996364	5.52835	2.00328	1.65709	1.54127		2.37126
1.82164	1.70948	4.8261	4.40702	1.88015	4.71659	3.95312	1.77045
0.968721	1.50916	1.68253	2.66276	2.9026	1.80494	3.90283	1.38821
1.47103		4.7147	1.71434	1.5623	4.62577	3.01452	1.27232
2.30002	0.945819	2.16296		2.82639	1.9992	5.83748	1.27257
3.35677	1.37266	3.57537	3.07224	5.03055	3.07581		2.5919
1.46867	1.29808	6.01327	4.1344	1.63197	0.996173		2.33437
	2.1334	3.45862	2.15246	1.71936	1.7163	2.77044	2.04483
0.967994	1.21315	3.73964	1.59099	2.6464	3.19123	2.60805	2.02327
	1.0896	1.38123	1.58552	2.06015	1.11843	4.73098	1.07564
2.35016	1.76446	2.97928	1.92514	2.66051	1.17549	6.57882	1.41725
1.79673	3.3323	6.09663	2.54522	1.78944			1.02864
1.33758	2.81187	3.26324	5.67083		2.16102	2.11726	5.75807
1.53686	4.59297	8.39208	2.22019	2.67388	1.71536	7.28333	2.29215
1.84834	2.17439	2.14463		3.07666	2.82723	2.47231	5.41056
0.966484	1.70849	4.64778	5.02374	1.86089	1.52404	2.89996	4.65151
1.89294	2.89809	1.43227	2.76516	2.34474	1.045	1.60129	1.30603
1.30486	1.97246	1.93179			3.71913	2.55781	1.34946
1.51062		1.87511	1.59672	1.72934	1.86926		1.63944
1.48749	4.82533	5.70913	1.59163	2.25134	1.61724	3.81354	2.24597
2.947	0.927127	4.85665	2.0123	4.84693	3.52824	2.04977	1.45447
3.49928	1.8336		1.23927	2.49054	3.90765		0.989764
2.15799	0.879416	4.93093		1.32749	1.06221	1.51665	4.32861
3.4609	1.40635	5.91569	2.00131		0.96567	1.45489	2.21733
1.04954	1.30122	1.48764				3.42239	4.86845
3.07911	1.08159	2.86796	2.36124	2.61515	5.28824	3.7976	2.8627
0.940012	2.786		2.28645	1.23335	1.94506	7.48791	5.96116
2.70499	1.18457	2.03901	1.43464	3.81957	3.33271	6.49771	1.1106
0.955365	1.68794	3.46567		5.33912	1.01751	3.70009	2.85582
3.77374	2.22585		3.32702	2.10027	4.41431		3.30148
0.933948	1.36535	6.54517	1.37449	1.40107	3.62537	5.4955	1.90475
1.75864	1.42488	8.20313	3.99599	3.04656	1.44224		3.96253
2.6304	2.55445	2.63053	1.73745	2.32662	2.05118	1.54107	5.42289
	1.0776	3.63518	2.39728		1.89917	1.55	1.26895
1.16124	2.53991	5.31317	1.95704	1.96117	3.35711	1.99959	1.36057
1.05119	1.48399	2.83116	1.96377	4.65505	1.7557	3.9517	0.694223
2.71374	2.04393	1.86947	3.75478	2.15277	1.83885	1.53851
1.08095	2.14429	2.33582	1.63692	2.60143	4.89507	7.32247
2.16555		1.61239	1.37834	6.5946	1.26939		0.879124
1.43914	3.68746	3.24533	1.63383	3.87766	1.07962	2.04073	3.08334
3.27715	2.01382	8.5526	1.41132	2.9918	1.34531	6.71697	0.728145
1.97934	1.61087		1.88526		1.35582	8.16934	2.00697
1.71236	2.35155	3.55282		1.76936	2.3438	3.29355
1.24237	0.977451	3.53596		4.84136	2.94095		5.0916
	3.52045	2.32302	0.96151		2.15058	5.96063	2.39225
1.71307	5.33458	3.47756	2.64415	1.65227	1.29821	1.52196	5.12176
	2.4867	6.92565	2.08087			7.3874	1.6472
1.24878	2.82071	3.62999	1.06863	5.39512	1.19229	3.72621
2.56471	1.12117	3.66072	0.832741	2.22056	1.48252	3.47884	5.16054
1.49096	1.14921	1.92835	0.991748	7.42104	3.38301		3.88474
2.42406	2.13266	4.74766		4.37617	2.43931	4.40996	2.07612
2.71717	1.1378	2.75238	2.76206	4.88215	3.05194	2.00404
	2.48744	5.89224	1.25698	4.22082		3.94275
3.92549	1.79984		1.70207	1.5634	1.61172	6.05412
2.6057	1.12378	5.748	3.72844	3.99523	1.67584	1.78719	3.7146
	3.67246	1.97802	1.19139			3.60159	1.41807
2.31787	1.19571	5.5192	2.58694	2.55704	1.10209		0.736639
		7.0731	0.955976	2.65019		2.59888	1.27878
2.85629	2.05524	3.88093	1.04471	2.60234	1.68647	3.85337	1.67648
1.52478	1.60594	2.9093		1.18634	2.57474	2.30363	1.03121
2.72353		6.62292	1.5517	2.79754		2.12033	3.29133
1.13044	1.99837	2.7955	3.05098	2.83606	2.9738	6.8527
0.820937		6.51195	1.55019	2.08336	1.32464	4.18683	0.827166
1.07036	2.07445	2.96794		1.7832	0.909016
0.912376	0.904308	4.53644		1.48502		3.63164	1.98118
1.69486	2.09219	3.69308	3.51162	4.94108	2.81882	1.36859	3.01748
	3.91151	3.11543	0.892074	2.17259	3.64658	1.50964	3.45189
4.03435	0.917126	2.34908	1.84233	1.26728	1.00932	1.94132	1.64039
2.84353	4.65797	1.72999	1.04273	5.32458	4.78762	1.90441	1.35815
	2.38331	1.7134	1.02166	3.53888	1.98096		2.04987
	2.79262	2.38709	2.92867	1.39991	1.2885	2.6468	2.20881
1.73967	2.83088	1.66533	2.01939	1.68032	1.37225	1.75431
0.972522	2.55408	6.4681		2.28865	3.61144	4.70415	0.790432
0.848887	4.6647	2.33481	2.03038	3.81663	1.65304		2.38751
1.94845		3.79448	2.27837		2.49994	3.8153	1.0578
1.36622	1.65865	8.9364	2.12299	2.53295	1.35559	2.08817	1.64203
	1.51783	7.31465	3.81747	2.52371	1.0853		4.07826
1.98536	1.6015	4.30422	0.906933	2.45335	5.28572	4.74308	1.68501
3.48907	1.14328	8.95126	1.24638	6.02197	5.27165
2.07148			4.27464		1.32405	1.75647	2.67455
1.35094	1.14949	3.20058		1.40497	4.04493	6.83097	2.47689
4.54425	4.67849	2.12486			1.70697	1.89305	1.91869
1.12047	3.3104	4.37438	4.75738	1.16939	1.71641		2.45707
0.841065	2.15009		1.3936	2.16027	0.981057	4.34743
		4.80007		1.97148	3.52475	2.1279
	2.65637	6.05126	3.92865		4.13088	4.06393	2.78991
1.09957	2.6057	2.00626	1.7487		3.43569	2.46475	2.09234
2.11094	2.96782	5.05834	4.66805	3.91006			6.21044
0.792894	3.56432		2.67417	2.14556	1.83178	1.96673	1.05558
1.21353	1.46999	1.71719		1.52349	1.85078	2.34467	2.59165
1.69096	1.29596		1.46288	1.43152	1.09655	5.84222	1.12294
	1.22169	7.20524		3.00568	4.27775	4.20691	1.84019
1.94843		3.65464		4.03173	1.60783	4.80765	3.46514
1.08737		1.53807	4.03982	4.2115	1.40596	5.05044	1.36342
2.55872	1.27162		4.6422	3.81891	1.94808	2.28984	3.54013
1.40911	1.75479	1.3568		4.28048	3.18406	2.42328
1.14321	1.71417	1.59544	4.69796	3.12156	3.31033	3.76472	3.41163
1.09417	1.43166	1.43703	3.91814	6.76369	2.28513	2.79611	1.01058
1.60821	1.22795	3.11254	4.49747	2.19543	5.24685	4.79127	4.32507
1.83868	1.29479		2.7974	1.65447	2.21652	6.07408	2.21865
1.23141	1.39273	2.338	3.91955	5.9614	4.84269	6.62183	2.36572
0.898946	3.08688	1.84155	4.22421			2.59695	1.78315
1.63235	2.3227			4.37614	2.49163	3.44533	2.04988
0.936777	0.888083			1.43242		3.0186	0.811684
0.946035	3.08163	2.21247			2.95893	2.20616	1.86572
	1.61922	7.20065	1.80959	5.84664			1.97334
1.08123	1.61915	7.14404	1.87721	3.68473	1.49811	3.6989	4.55049
1.85068	3.27487		0.993915	1.48918	1.53183		2.90131
3.77203		2.69345	1.89252		1.40378	2.69236
1.23899		1.61226	1.83004			1.59518	0.964378
1.47338	4.10778	3.27298	1.00304	2.86962	1.29646	7.39496	1.15684
	1.48663	1.52552	1.34091	2.97271	0.650124		1.66551
	1.463	3.5842	1.17335		2.75465
2.48562	1.78926		1.49516	2.71785	3.33092	3.31939	2.88532
1.73253	1.97536	4.42832	1.61187	4.54609	0.97057	2.57947	1.17164
2.39539		5.302	1.12683	7.61728	1.24935	8.69064	0.893226
2.8992	2.87632	8.01503	0.906083		0.999356	1.604
2.09241		6.97496	1.60648	2.57381	1.25393	3.13348	1.09046
1.25173	1.37264	3.34243	1.43763		1.19902	4.68597	0.959089
1.45957	0.939942		1.49376			2.75173	0.938374
1.73219	3.60119		1.8205	3.47245	2.15431	1.59943	1.22148
0.75746			1.71868	1.81687	4.55517	2.35749
0.834669	1.17075	3.15109	2.6565	2.48239			1.64414
	2.30435	1.63848	2.39428	2.55561	1.21349	3.58683
	1.36903	1.97929	1.89075	2.4064		2.25365	1.09486
		2.34647	4.24261	2.20768			1.31657
1.11352	2.37208	6.30481	1.48563	5.38753		3.58607
2.69096	1.26671	2.03511	1.67521	2.88295	1.82086	6.08447	1.22177
1.09959	5.17245	3.42608	2.43174	1.59739	3.56942		1.50612
1.30884	1.19906	5.23788	4.24942	2.47383	1.10514	4.47425	3.13443
	3.50988	2.60328	1.41786	3.75209	3.43737	5.24789	1.06891
2.19481		2.92605	1.85173	1.92785	1.3187		3.68643
0.962184	3.87208		1.52418	4.16503	1.21909	3.02977	1.51221
4.41229	2.83459	1.62234	2.16841	5.7913	4.0989	2.21579	1.21929
3.56316	2.48392	2.84796	1.56745	6.72364	1.45595	2.25165	1.91403
1.0925		5.45683	1.86874		0.867591	1.34629	2.46765
3.19606	1.20719	3.04032	1.15462	4.60789	2.02698	1.80135	2.40648
0.809068	1.23082	3.96973	1.76848		1.25808	4.38271	1.22051
1.06324	1.35466		1.50148	3.75978	1.64333	3.21111	1.11593
1.35302	5.26704	1.89093	1.64468	4.20448	1.8254		1.24532
1.14344		1.49662	2.63751	1.9822	1.68804	2.49548	0.860367
	2.30624	1.78348	5.15131	1.45669	2.98527		2.3595
3.71319	1.55479	1.74882	2.79572	1.89517	1.66524	5.92683
			0.93264	3.26149	0.771519	2.1817	2.44499
1.32212	2.00816	2.1063	2.28923		3.73664	2.38806	1.00284
1.37492	1.60872	2.15079	2.20921		2.09446	1.94473	1.54717
1.13824	1.16731	4.54469	1.4247	2.13769	2.34407	3.18585	1.48781
1.43501	1.24152	2.87606	1.24093	2.05818	1.0559	1.88769	3.99817
		5.7531	3.82792		3.12254	1.64229
	1.14185	2.2239	1.33097	3.36655	1.76556	7.9832
1.40378	2.07423	1.74846	0.748375	3.46512	2.78897	3.64176	1.43779
1.26856		2.05422	1.71005		1.50593	2.06429
0.942249	3.25651	2.23294	4.36834	2.08636	1.77346	2.8461	2.58607
0.720959	3.45885		2.87353	2.43058	3.79712	2.18621	4.51648
1.72949			1.52227	4.38361	3.71606	2.35441	3.15536
	2.61554	7.31272		2.02098	2.22489	2.62288	1.6586
3.20487		4.72442	3.28145	2.07217	1.31564	1.76941
1.38198	5.19241	1.85249	1.684	3.61146	1.68327	2.65246	1.22554
	3.00255	1.55894	2.84335	2.83796	1.72017	4.71504	3.02236
0.891153	1.01924	5.5174	1.77097	4.39071	1.22339	2.54656	1.37825
2.63217		3.44907	2.38983	1.87703	2.59963	2.76367	2.43652
0.959756		8.19493	1.48643	2.23592	5.19879	1.78974	2.6061
4.18532	2.05329	1.9029	2.7622	2.41441	0.774309	1.3607	1.23464
1.20359	2.16436	5.22548	3.02382	4.54635	1.24038	3.05238
	1.23335		1.256	1.54162	2.59617
1.10641	1.74268	6.53503	1.61219	2.30476	5.19203	2.47783
1.39866	1.20876	7.33052	1.81312	2.20902	2.65734	1.99565	1.9408
	0.833212	2.34714	1.89512	1.79568		1.97729	1.87563
1.10645	1.31835	3.80386	1.86737	4.47227	1.14791	1.59063	1.10461
2.73025	3.12062	1.67541	3.06818	2.73907	2.98396	1.96982	1.27264
	1.18233	3.59706	1.58517	2.18246	1.42007	2.30176	2.24849
1.81459	3.23511	5.41567	0.843542	5.75028	3.17722	2.24648	1.34385
3.62914			2.21706	3.01901	3.61138	3.56725	1.26876
3.23909	2.88484	2.07343	0.878651	1.8707	1.27421	2.85418	3.00719
2.08609	3.15099		0.836856	2.26832	0.708367	6.69913	1.28349
1.14201	3.73862	2.31566	1.52844	1.24856		1.7124	1.39016
1.1676		2.96716	1.64146	2.50795	3.35138	3.14273	1.15424
0.916192	1.48989	5.10992		6.22935	2.03837	3.37476	2.41267
	1.54242		0.808867	1.71438		1.56034	2.67139
1.56282	3.90459	2.82113	1.3686	1.66714	2.87987	2.06064	1.47107
1.10553	2.58819	2.5952	1.92366	2.58301	1.54851		1.67259
3.20246	1.14139	9.46364		2.04371	1.64214	2.84486	3.56191
	1.45909	1.97631	2.95638	2.74009	1.58744	5.88759	3.42207
3.17161	1.37539	3.25155	0.847344	2.93662	1.20369	4.85572	2.93246
0.929598	1.95233	3.38881	3.42413	3.68011	0.954066	4.52441	1.3157
0.826495	1.03518	8.4144	2.36035	2.04237	4.21715	4.00596	2.67093
1.5817	2.62544		2.16577	2.79812	1.11176	1.60527
2.36311	2.16535	7.52662	3.3209	2.47808	1.14958	6.33087	0.962572
1.34634	0.934386	2.41096	0.99736	2.40953	1.36441	2.83464
1.56224		2.73578	4.0747	6.14096	1.0883	1.81905	2.92981
1.82979	1.18567	1.71789	0.975987	2.12019	3.43048	1.99914	1.81047
	1.83606	3.7049	1.61142	1.32754	2.88973	1.38324	1.34252
0.798585	3.92342	3.03857	1.98109	2.8663		8.26455	0.938794
2.16666		2.15571	1.51607	1.52349	4.83073	3.9866	1.33799
0.994265	2.2411	2.21833	2.13321	1.7598	3.41657	2.88407	1.21197
1.37225	1.7797	2.22439	3.93042	1.97482	1.15099	7.44046	0.891534
	3.35641	2.5552	1.42092	2.18958	1.16619		0.916535
2.29214		1.64549	1.69173	1.98716	1.59006	1.95324	0.962988
	3.49403	1.8625	2.81884	3.53081	1.19288	7.82178	2.58664
1.21435	3.33972	3.57553	1.36033	2.08188	4.20709	2.44299	0.985888
0.983847	1.76749	8.9407	2.35533	5.04493		3.46316	1.40202
0.836464		2.813	1.16533		3.33384	3.20123	1.49315
		3.07249	1.24841	3.62402			1.20818
0.877225	5.30335	4.17403	3.95137	3.34279	1.05749	7.33162	1.38446
0.776262	1.25419	2.8301			0.944416	1.92961	1.69372
1.02439	3.8712	2.6954	0.903962	4.53936	3.4593	1.97026	3.20945
0.826653	2.17826	2.45361	1.06826	2.72118	1.88056	3.27721	1.37246
1.5823	3.68683	6.90246	2.43519			4.85732	1.62061
1.65857	1.16137	4.67673	0.989263		1.14044	4.79807	2.23292
1.34406	1.65945	4.13741	3.15677	1.67107	2.56777	2.20118	5.57846
2.04324		3.49858	0.88908	1.86292	1.77018	2.06416	4.08773
1.0428	0.984651		1.3912	3.60537	1.3074		0.967149
		2.31391	1.96073	3.37561	1.46703	4.57826
1.11199	2.60254	3.78687	1.14527	1.46666			1.11277
2.19895	2.8092	2.92558	4.65132	2.30963	2.78376	2.87851
1.46847		3.4489	1.99394	4.42879		6.42436	1.40568
	3.75017	1.39326	1.26139	1.62744	1.56848	2.67652	2.20048
1.2546	2.99035	3.09616		5.81216	0.740702	8.01453	1.72622
1.274	4.3918	4.7462	2.17366	3.33581	0.97233	1.52739	2.39483
0.961012	1.07035	5.82687	1.68396	3.6393	3.8743	2.20466	2.19508
2.17931	3.93467	3.88892		1.71677	1.03329	1.84504
1.12926	3.05236	1.48588	0.945998	1.37176	2.06906	4.16877	1.49624
0.974881	2.03722	3.81745	1.04616	1.45305	1.62354		1.10496
1.15427		2.02904	4.33288		1.76	2.32799	3.94394
1.97115		2.81161	1.02056	2.61965	2.72251	1.67919	1.62313
1.71558	1.98564	3.07603	3.65267	1.89664	1.84504	2.56946
1.05976	3.16044	1.96815	3.26371	6.28033	2.76998	1.8269	2.03608
		1.9887	1.84773	1.81113	3.36809	4.77537	1.17178
3.85587	5.12343	4.13377	1.50313	1.72765	4.48214	2.31612	1.45096
3.249	1.69815	2.07504		3.38543	3.15512	2.32365	0.765837
1.2363	2.42058	1.4186	1.97191	2.79484	2.01741	4.28856	3.59927
0.976956	1.39752	1.84774	1.35287	1.85047	1.16994	1.54956	2.76066
1.71557	3.81739	2.0109	1.94742	3.07832	1.07194	3.31747	2.11342
2.58421	1.10494	5.06324	2.20231	3.2977	1.57734	6.10947	3.24096
1.37575			0.866481		2.17609	4.52732
2.20297	1.12288	1.51566	1.26784		1.08522	3.24857	1.7295
1.54369	3.04384	2.72287		6.23205	2.61201	3.40956	1.56405
1.7139	2.20606	4.56539	1.44196	1.78456	1.98352	2.18241
2.6114	2.08512	3.15993	1.3672	4.2306	2.23863	6.15179	6.21953
1.31058	3.24902	3.76485	1.24596		2.19342	1.971	2.05344
1.30517	1.40716	5.40222	1.51679	3.05169	4.40223	5.55581
		7.53647	1.59065		1.52959	4.33557	5.61592
2.83677	5.00512	3.11404	3.73787	5.10098	2.60116	3.31176	4.7086
1.33549	0.881507	5.41879	2.27974	2.24885	1.07062	2.2225
0.98934	1.31483	2.68503	0.90424	4.98866	1.2846		2.27063
1.02082	0.951814	5.52347	1.61741		1.28997	2.26057
3.36267	3.12632	2.04036	1.33611		1.42734	3.74805	2.32108
4.58879	1.0869	2.44383	1.66478	2.61522	2.3107	1.95155	3.56285
1.18287		3.64061	1.30867	1.33355	1.31668		1.67181
3.29478		2.09731	0.898236	2.38685	1.19331	2.78283	2.12864
0.729358	2.04565	3.19669	1.6283	3.84692	1.62051	4.88628	3.46445
0.731931	5.0487	4.81753	1.50901	5.79575	4.16748	1.81441
1.05246	1.00168	2.69519		2.58357		4.32516
	3.7773	1.52316	1.61758	3.44244	1.13973	7.14632	1.45935
1.53535	2.44646	1.67921	1.64953	5.68256		2.89933	3.73894
1.36407	2.26582	2.22548	2.9347	3.99129		4.94227	1.38918
1.35215	1.3069	2.23368	2.65224	2.77118	1.55635	4.52169	2.00704
3.03163	4.59833	5.97477	2.1181	4.00385	4.03328	5.75447
1.69644	3.67692	1.7554	0.736058	2.60948	0.929627	4.33147
0.816875	0.950175	2.72864	1.46381	6.11909	1.83601	5.499	1.31222
0.943419	1.28595	2.4841	3.41499	2.38447	2.8696	4.55419	2.94329
2.17218	0.888913	4.21004	1.45557	2.30648	1.15602	3.4983
0.87558	0.996833	3.72524	0.908563	4.24721	3.54166	3.71428	1.61302
1.52205	2.0375	3.91278	1.16406	4.37794	0.900332		2.57406
1.33086	4.77113	7.86779	2.62095	2.21306	3.67614		2.08434
2.10914	2.70545	5.88944	1.41798	3.38263		3.29583	1.50379
1.21588	3.05116	1.39946	2.7491	4.33634	1.80444	6.41023	2.0342
1.32638	1.62148	6.90943	3.0156	1.98458	1.16295	7.49577	1.70638
0.869784	2.07309	1.56039	1.56275	2.55228		2.72128	1.63679
3.28653	3.43187	6.67558	1.21675			3.87668	0.892653
1.49319	2.58864	2.35356	1.40358	4.85212	1.28422		1.55458
	3.66322	1.91915	1.04031	5.09998	2.25107	2.23159	1.49692
1.8646	2.01016	3.83274		4.72238	1.83789	3.41778	1.37351
1.39989		4.80661	2.96838	5.59434	1.24773	3.52847	1.23389
	2.81038		1.64477		3.82175	3.16228	1.24651
1.74733	1.50561	2.32128	1.62895		1.09473	5.05734	0.632898
2.62361	1.17161		2.02804	1.69062	3.80453		1.22074
3.47585		7.20743	1.41025	3.85636	1.11138	4.70213	3.38827
	1.68459		1.8858	6.84271		3.5866	2.45375
1.66705	1.8791	2.78855	1.60834	3.81715	3.44294	2.9003	5.0435
1.25817	4.5715	1.95439	2.83252	4.53733	2.99004	7.02905	1.13655
	2.80234	4.22703	1.67887	5.14485	4.28965	2.77031	1.62743
3.61608	1.63897	2.49923	2.45779	3.49529	2.54864	3.31458	5.48386
1.45129	1.71321	6.48767	1.35153	3.66802	4.37121	2.93265	1.18413
1.42114	1.81328	5.57309	1.85685	1.74775	4.60222	3.03773	2.0866
0.991026	3.74219	4.19584	1.68648	5.76847	1.55427		1.31543
0.931049	1.16902	3.74676	1.7269	2.55004	1.43002	7.61629	3.24847
0.640771	0.915201	8.46128	1.45889	4.43394	1.2714	2.45838	6.04036
2.08564	1.60254	6.37808	3.58635	4.41844		3.08443	0.956256
	1.53031	3.89309	1.9533		1.71266	6.44418
4.34409	2.95212	3.83483	4.07621	5.42043	1.09304	2.17245	1.59185
				6.40266		5.84071	1.50969
1.88049	2.14506	4.14227	1.57222		1.67819	8.00116	1.51735
1.66928	1.21148	1.85312	3.37284	2.53449	2.69255	1.48574	1.68698
1.10532	1.58137	4.79965	1.41819	6.13	1.83999	3.83771	1.26879
1.1623	2.11764	2.25543	1.18281	6.88358	1.66875	1.65471	2.55875
	1.00053	6.07283	1.83356	3.68715		3.87606	2.50877
0.811071	1.40347		1.97931	1.95895	5.07716	2.23642	1.36079
1.53654	4.11306		1.47759	3.52397	2.47019	1.67727
0.935552	2.89637	7.87481			1.5843	1.73181	1.69797
0.932566	2.67375	3.73053	2.65173	4.57203	1.2828	2.14988	2.75725
3.57058	2.31716	2.45828		4.21297	1.51358	3.32453	1.37926
	2.19851	9.00556		3.21387	2.55746		2.68241
1.98134	1.64057		2.64973	6.65106	1.76464	4.8203	5.00059
0.789839	1.22991	4.33122	1.53406		1.34871	2.56917	1.48493
1.35685	1.60705	2.17068	2.35218	5.43315	4.80355	4.06186	1.45187
1.04348		3.62266	1.52625	3.1701	2.80632	3.97667
2.09983	1.32709	5.01535	1.27166	3.81346	2.0302	6.76126	0.83487
	5.24776	3.25707	1.46602		4.39245	2.57454	1.0947
	0.818414	3.07098	2.0455	4.53508	3.03231	6.34559	1.67077
	2.29219	4.2747	1.78998	5.27291	3.01943	4.18626	4.8261
0.758423	1.52224	7.29189	2.20048	3.46596	3.98531		1.30917
1.1515	0.928428		2.01339	1.76218	4.36204	1.62422
	0.796307	4.19732	1.16555	1.6536		4.83409	3.40412
		5.32114	2.21206	1.62407	0.938674	2.74893	2.05605
3.79382	1.24549	1.1592	2.31728	6.73361	1.77965		1.82497
	2.31888	3.13524	2.46396	2.64455	0.987294
	1.93933	1.75794	2.41878	4.6223	1.51152	4.47992	1.21564
0.900396	2.34413	5.52358	1.79434	3.59993	3.11048	4.155	1.20296
2.55853	1.66849	4.33108	3.6895	3.36813	2.68694	4.34504
2.06716	1.07254	3.70406	1.76743	7.06274		4.28603	3.50358
1.56857	1.39144	4.70391	1.64505		4.67052	3.80082	5.42074
3.72179	1.91721	3.20354	1.89573	2.4356	4.12614	5.29737	5.1896
3.26803	1.7039	1.8707	1.1057	3.23928	2.70684		2.94177
0.923308		2.50192	4.96297	3.27269		4.92889	4.12032
		4.67374	5.32109	4.13761	1.23648	4.88923	1.39735
2.45221	1.57137	9.3952	1.87046		2.59881	7.78673
3.39046	3.07084	4.99346	1.88535		2.44791	4.91967	5.10148
1.08231	1.15428	2.74482	1.25892	3.18689		3.24238	2.27463
3.99285	2.54521	2.32816	2.3585	2.90575	0.862287		1.29434
3.16964	2.53391		1.12137			4.27696	2.20179
	2.20661	9.42381	1.53279	3.18314	1.14538	4.19815	4.69158
2.50676		4.61168	3.29728	5.7656	4.32502	7.89055	3.22135
0.680308	0.840345	2.72458	1.28849	2.1279	3.37801		1.17609
1.28572	3.42523	4.53164	2.42171	2.16254		2.71953	1.31591
1.14928	2.03414	3.35215	2.71616	5.65239	4.60337		1.20329
2.5929	4.70389	4.26083	2.06096	2.15971
1.18448	1.1746	5.35027	2.6039	2.00757	5.1541	5.06176	2.5212
0.871208	2.50996	5.2109		1.39133		2.56486	2.40352
1.10926	1.37557	3.47771	3.01791	2.65056	3.36505	2.69284	3.71562
0.803607	2.2334			2.57096		1.96809	2.67409
0.929281	1.30897	1.85001	1.39328		1.46588	2.85114	1.94185
1.77054	1.94576	2.35093		5.50849	3.02436
1.72759	3.49903	3.02259	1.37874	3.64267	2.82143	1.74503	3.40246
		4.28384		2.26854	0.719517	2.7487	1.5728
1.5973	1.26355	3.69496	4.17934	4.98011	1.05371	1.94616	3.13062
	0.862092	2.36032	3.56918	4.00479		4.04449	1.61753
1.71206	1.1923	4.08739	1.95277	4.75779	1.24598		1.91303
	1.81811	2.55199	4.54075	2.77692	2.04338	3.29169
1.00211	4.51346		1.05817	2.00755	4.46562	3.67145	1.25516
1.48385	1.85263	2.15322		3.38983	1.33994	2.38323	1.39301
1.69095	1.78223	3.43804	1.87341		4.0796	5.92474
	0.982233	8.01505	4.94918	1.96961	1.16187	4.3744	3.42299
	2.79479	4.16027	1.4967	7.32319			1.24573
1.23894	1.23764	1.5947	4.40616	4.04731		2.18607	2.48715
3.89417	1.7987	4.22253	0.886239	7.01145		3.90252
3.07089	1.0459	2.35465	5.3487	3.0631	3.75346	4.51178	0.950666
2.56961	0.894697	3.27559	4.60176	3.55923	2.02877	3.08306	1.51851
1.77943	1.7736	4.06906	1.97871	5.20023	4.28276	7.1718	3.77165
0.816416	0.940665	6.42364	1.14385	2.08626	1.82418	5.48726	3.15834
1.87456			2.24619	3.85046	3.54104		1.06934
1.3144	3.31021	2.49802		2.48522	1.29507	7.05605	3.34376
1.45309	4.57116	1.46932		3.54603	1.99224	2.31057	3.68638
	1.05859	1.88305	1.57835				1.85155
1.37975	1.25962	2.72783	1.64227	2.99565
1.78465	2.61463	3.23751	2.73126	2.68508	3.54989	7.14054	2.31998
3.08958	1.63967	2.47284	5.21952	3.53005	2.14153	1.70634
1.43873	0.980441	1.75141	1.55426	2.75032	5.16185	1.51466	1.83202
2.21887	4.6074	7.6248	1.76434	3.29154			1.73116
0.812483	4.50007	2.74479	3.28946	1.90937	2.91263	2.885	1.21407
1.74027	0.997984	4.01421	1.71077	3.21507		3.07277	3.15012
3.76904	1.54475	1.8049	1.79612	4.98688	4.82481	4.74373
1.60178	1.43012	9.5004	2.09761	5.06102	1.55061	3.4713	2.10261
0.934847		1.71867		2.50244	2.93557	5.69641	6.03478
2.74554	2.52653	1.79049	2.16422	4.46558		4.74109	2.63153
0.815846	2.22137	2.697	2.20852	1.73378		5.32433	1.26553
3.16795	2.54752	6.3601	3.46911	6.8058	2.26765	8.72096	1.19666
	0.866217	3.1237	1.83763	2.22968	1.16209	7.38414	1.73181
4.60041	1.07856	1.54322	1.71871	4.4229	1.26933		1.46794
0.946646	1.8467	1.69165		3.82647	1.7597	3.7761	2.17472
1.88778	2.70988	1.4196		6.86226	0.989797	3.76745	4.90314
1.20912	3.09476	2.31633	1.92787	1.95414		4.59924
1.73443	0.896309	3.48559	1.86456		1.27483	3.85281	1.18879
0.780103	2.2932	1.46963		2.70596	2.6483	2.49104	1.14405
		6.07487	1.26235	3.35715	1.42705
1.27732	2.78208	6.1684	1.46235		2.50354	5.87055
1.72674	1.79616	3.10468	3.06242	2.18097	1.2835	1.46879
0.790903	1.40486		1.15415	3.06536		2.59635	1.31439
1.19	1.45782		0.879895			3.14017	3.44736
	1.17768		1.38891		1.87571	5.52362
3.60431	1.18411	6.02058	4.30727		1.59674
	1.0096		3.26474	3.39654
1.34255	1.3642	3.54128	2.46724	5.80368	1.61676	2.18645	1.27939
1.63202	3.52939	5.906		4.71031	1.77048	3.78651
1.07169	1.65079		4.00789		2.38233	7.19729	0.948599
2.61674	1.13383	2.7263	1.22988	4.81439	2.39059	2.10814	2.74516
1.77455	1.97161	4.653		2.12725			1.4314
1.00552	1.38788	2.11971	2.68695	3.00709	0.883259	1.80195	3.64578
1.40217	0.907963	1.55987	3.08958	5.62616	2.55932	2.26405	1.41232
1.13418		1.5519	4.09155		1.16882		0.896309
1.41525		1.80652	3.93105		1.71271	1.38232	2.20713
1.81334	1.15913	5.51728	1.03801	5.62742	0.869329
1.79645	1.21923	1.75273	4.56372	4.64271	2.01531		2.15321
1.50283	0.931902	3.19328	0.940551	5.08135	0.868151	1.52724	1.14045
2.04297	1.44556	4.18165	1.69121	3.05613		3.44557	3.14762
2.30259	1.25244	9.32299		2.78677	1.25508	1.24138	1.07805
1.24813	1.15217	4.73116		2.91716	1.25397	4.38893	5.98499
2.64533	1.71718		5.31796	2.23288	1.1838	2.33192
1.04087	2.43736		1.0635	5.5282	3.5702	2.32235	2.69808
0.894508			1.1449		4.09543	2.49993
	4.90337	6.70102	3.77737	3.51672	1.24511	3.90964	1.00765
0.983148	1.2289		1.48491	3.72847	2.82845	1.56792	1.22057
2.60331	1.0613		1.92761	2.55298	1.96852	1.89983	4.53926
1.33988	1.77373		1.0231	4.05875	0.97671	2.7607	1.99597
2.26545	2.21185	7.85976	2.02756	4.45498	0.74352	1.80083	1.20827
0.762564			0.989607	2.82447		2.35539	2.06114
3.7948	0.970168	8.46692	1.13968	2.51906		3.80379	1.29973
1.01703	1.20538				0.845638	2.2369	1.63666
1.1863	1.38974	3.92535		3.19536	0.8347	2.01305	1.5081
0.974193	1.95039		1.81426	1.49938	0.841753	1.31525
1.04529	1.78073	3.95409	2.84514	1.31419	2.27285	7.69723	5.93609
	1.51416	4.33039	1.31173		2.12943	4.20103	1.57965
	0.942487	6.75345	1.56894		2.80152	3.57427
0.994018		5.13757	2.6349	1.63115	1.34858	3.65306	1.95494
	1.95323	3.0155		1.97192	4.44513	5.21731	1.10865
1.78331	1.66636	2.91051	0.924817	6.96845		2.69884	1.26995
1.50814	1.49669		1.47095	4.9564	2.34047	5.09751	1.83654
1.08956	1.31339	2.4749	1.59168	3.51645	2.69538	1.65632	1.78271
0.871498	4.21717	1.26391	1.46849	5.58441	1.52258	3.59261	1.42384
0.792181		4.20606	2.1708	4.07805	0.931011	1.7368	3.45702
		8.91039	1.70068	3.58207	1.48721	2.59293	0.891188
2.67375	1.69012	3.12186		1.66907	0.888512	3.29357	2.54014
1.07898	1.21261	2.17748		6.5245	1.30657		1.71916
0.77059	2.3049	2.59491	1.99349	4.00378	1.05692	3.35431	1.16419
3.31707	0.975986	6.56729	2.00187	3.71911	2.39908	2.41369	1.93968
0.897268	1.2236	4.38243	1.43322	2.14592	0.980952		4.24358
	1.5593	3.61005	0.927489	2.46421	2.2733		1.0294
0.919178	1.04696	3.56474	1.39747	1.5515		2.51949	3.70777
1.4262	0.968958	3.63107	1.26399		3.64207	7.12873	1.92734
1.72118	4.60974	3.90537	1.8245	1.51289		3.51104	1.63736
3.4154	0.926339	3.06168	1.9258	1.43676		4.59444
0.708871		4.37957	0.866623		2.29827	2.94729
2.84801	1.24601	4.03473	1.00276	4.19311	0.963914	2.51706	1.87596
2.58018	0.982294	7.31626	0.994323	1.99066	1.08142	2.06297	1.705
1.3921	3.74624	4.2344		3.27351	1.16894	1.77521	4.22437
0.838407	2.07475		2.14774	7.2151	1.41229	1.14639	1.7779
0.890329		4.2931	3.44121	4.67105	1.39575	3.16164	5.68128
0.975209	2.04938	6.80614	2.08934	4.40742	0.804549	2.64458	1.17299
1.50363	2.2081	4.07235	1.38055		2.21754	1.64901	1.28749
1.94565	5.20915	3.97763	1.79505	6.21674	3.50512	2.26672	2.8363
1.29581	0.886919	3.0805	2.74151		2.62313	2.82693	0.919021
2.0313		5.56282	0.887557	6.96574	0.999532	4.81641	2.48862
2.72936	1.25054	5.40225		2.94572	1.1541	2.7333	0.804061
1.32004	1.19816		1.86328	6.96383		2.33071	1.26609
1.08711	0.998453	4.6744	2.22832	7.15057	1.37057	3.24025	2.95388
	4.34876		1.7286		1.83931	6.82977	0.696853
2.20616	2.35403	1.53265	1.83697			1.37593
1.51465	1.80075	3.73272	1.77999	3.40476	1.15745	1.48383	1.32756
	0.963282	2.09954	3.77958	4.23823	0.780755	2.87491	2.23434
2.36766		1.47395	1.87141	3.33059	1.82913	2.32472	4.8802
		1.89224	2.43134	4.75628	0.93887	2.84356	1.62303
1.52859	1.12317	2.49573	1.7357	7.02148	1.08461	2.10129	2.2667
1.18296	1.44425	2.63919	1.86461	2.0074	1.05609	3.34379	5.61827
	0.973582	1.66259	0.971945	3.24635	1.12016	2.22648	1.30072
0.652825	4.39426	1.24621	1.56844	2.03048		3.71595	1.22945
1.74535	1.19656	1.50495	2.10946	1.76812	1.15586	1.73547	1.43261
	2.59025	1.26493	1.00721	2.00913	2.10321	2.76687	2.32022
2.93797	1.36078	1.25349	1.92646	4.77469		1.91544	2.11711
2.64901	3.70273	2.9654	2.2248	6.00727	1.10662
1.29494	1.72266	1.48862	1.59705		2.3942	1.37936	1.62389
	1.55808	1.70863	1.99959	2.16048	0.943261	6.13116	2.27125
1.27437	2.7189	1.37821	3.60988	2.98453	3.07232	3.01199
0.987749		1.77118	2.20445	4.84157		1.8177
1.47683	4.02475	2.46045		2.83879		4.20335
	1.04288	1.65253	1.00791	5.88852	1.21141	1.91278	2.06061
2.97198	2.9709	2.03547	3.40326			3.47735
2.89196		1.71123	5.44096		0.729541	8.09	1.05662
1.0914	3.8719	1.65085	1.82099		2.95559	1.82089	4.77421
0.889584	1.84085	3.0194	1.72688	2.65682	2.04879	3.73787	3.93622
1.86273	1.70689	1.31424	1.21877	5.1662	1.14096	4.39536
1.56383		5.37263	1.9411		0.839299	4.1325	2.41187
	3.76985	1.81392	1.86584		2.0338	4.67538	1.70694
	1.1382	2.44312	2.48272	2.99802	1.64506	4.08943	2.76504
2.26594	2.73252	3.88181	1.71198	1.66009	0.956208	2.86335
0.976525	2.3853	3.84685	1.65228	1.28872	0.980641	4.86249	1.44165
1.63892	1.70404	5.58143	1.44799	1.96608	4.24129	1.79727
2.59653	1.53331	1.60979		2.9695		3.55124	2.0177
0.838275	1.36259	1.66466	1.88878	2.96681	3.58598	5.55237	4.05806
0.956593	1.11063	2.76223		1.9706	4.01294	2.8579	2.04529
1.54624	2.18235	5.3615	4.49015	2.81992	2.03683	4.35486	1.4437
1.62578	0.963384	2.37235		1.65586	1.18875	1.93246	2.38827
1.26357	1.24698	2.7369	2.21094	3.41035	1.68259	1.83136
0.840802	1.95685	2.25991	2.0021	2.32007	1.67792	5.07721	0.969568
1.17991	3.46907	1.64277	2.06856	1.29553	1.6707	2.45405	1.34275
0.733485	2.18744	4.42171	2.15325	4.75443		2.3057	3.61084
1.82409	2.46091	1.5096	2.97009	1.75781	1.05263	1.20305
1.16644	2.03476	2.24132		1.42381	1.18647	2.01004	1.89455
1.30431	1.2593	5.43973		2.38703		5.56891	2.19113
1.90132	1.57015	2.77815	1.14123	2.99999	1.43946		1.83689
1.19725	1.4241	2.24788	1.64499	1.60675	1.06867	2.04914	3.54704
1.57798	1.7058	4.1298		3.7048	3.54678	3.6516	1.77266
0.854084	4.93444	4.54684	1.79751	1.97792		2.84755	2.06274
1.00154		2.23204	1.67855	1.51617		4.83211	1.50329
1.03563	4.43848	6.14076	1.48657	6.43202		3.06513	6.18635
2.66351	1.13159	2.5297	1.58757		4.63064
0.832665	1.26704	1.74238		1.44026	1.06012	5.02864	3.26991
4.131	2.38916	1.19854	4.70061	1.28838	2.90745	4.50466	2.68618
		1.10973	2.31802		4.71401	4.45374
3.22776	1.908	8.37347		1.36269	3.9248	1.98346	1.80003
	1.23519	2.04417	1.73601	2.01273	1.91679	5.75258	2.79453
1.32892	2.06272	5.73196	2.9419	3.7826	1.30859	3.7682	5.62189
1.29976	5.00736	3.66155	1.80023	2.49383	0.867807	5.42221
1.28502	1.23399	2.71373	5.26933	1.90749	1.10057	3.55605	2.60119
		3.93588	1.92729	3.13213	1.99128	6.74219	3.16275
	1.75285		1.83246	3.26473		1.40167	2.02166
1.65091	1.36409	2.4501	1.38544	1.96182	4.32946	3.21441	1.33912
0.983071	1.03758	2.77083	4.11116	1.43452	3.45231	1.4247	2.62749
3.50376	1.38507	7.85091	4.65077	3.70334	2.08911	2.04443	4.12355
1.009	0.895207		1.62932		1.173	4.89102
0.716585	1.63538	1.56112	1.7107	2.23141	1.02386	1.51123
3.42354	3.34968	2.15011	1.48691	2.77418	2.33935	1.61244
2.87687		1.71336	1.56481		3.00934	1.18034	1.23645
2.51391	3.44834	3.92289	1.44899	1.9209	0.847133	2.95678	2.07176
1.3538	1.8616	5.70941		4.06573	2.06404	2.43724
1.44404		3.811		1.42821	1.1035	2.40557	2.63079
0.888233	2.51423	3.06351	1.46704	3.57017		2.9758	2.23644
2.93338	3.98379	2.2369	1.99567	2.63893	4.41064	4.85249
2.55921	0.933175	3.16068	1.25068	1.82326	0.874524	3.19826	6.20316
	1.03249	1.51841	2.02891		2.81787	1.83699	2.57473
	1.54117	2.14829	1.26271	2.72076		4.53337	1.5798
2.27637	2.16151	3.21507	1.45592	2.22876	4.94685	4.35646	1.95635
2.54066		3.24363	1.47988	3.98943	3.61164	2.21322	2.20668
2.4929	2.40077	3.44337	1.1907		0.939941	3.09181	1.39172
2.06557	3.61755	1.32909	2.01235	6.61736	2.97875		1.83425
3.3931		3.8894	1.47645	2.73434	1.68207	8.80286	1.24727
4.01515		3.84823	1.24969	2.45494	2.79762	2.33379	5.81472
1.00645	1.55047	5.38959	1.1079	2.04685	1.82497	1.54698	5.82721
	0.930389	3.42946	3.56646	6.09334	1.1204	3.92501	1.46715
1.36382	2.99915	4.65066	2.34133	4.15975	2.26146	3.60812	4.2348
2.31372	1.73084	0.906854	1.97827	1.04275	1.3748	1.48573
1.7807	1.06214	1.17001	1.11	2.39713	5.11467	3.51953
1.73671	2.18805	1.0522	2.57721	1.57994	3.75245	2.10995	2.97794
1.57532	1.32884	1.63583	1.58842	6.75011	1.75767	3.57326	1.03647
1.48595	1.60568	3.66439	0.988179	3.32259	2.11689	6.34516	1.23469
2.24429	1.11564	3.11138	1.3343		2.46611	4.53036
1.74779	1.18752	5.7469	4.5624	7.57319	3.85436	5.30163	1.21795
2.51818	1.1227	3.19674	2.34071	2.04371	1.7956	6.29391	1.12373
2.11431	2.13653	3.70958	1.24721	2.25148	1.17796	1.79808	1.53628
2.25581		1.52476	1.63186	3.84313		1.8373	2.87326
2.39636	2.6918	3.06758	2.00714	3.28864		5.13224	3.60997
1.31033	1.46948	6.68421	2.1605	1.37799	0.950619	7.2146	4.38018
1.58781	1.161	1.25154	1.78989	5.1689	0.833459	2.10922
0.982104	1.12207	0.941576		5.32842	5.33904	2.20854	3.08139
2.67928	2.99193	3.29094	2.03474		2.0185	1.60735	2.39037
1.67386		0.811597	4.20166	4.41763	0.780384	2.94073	2.40134
2.61984	1.11196	1.17711	1.25367	3.12145	1.4046	2.97228	1.49851
1.29848	1.06899	4.05838	1.3061	2.56089	2.03566	3.48857	2.81195
2.24832		8.49918	1.12473	1.045	0.917056	4.67078
1.6919		2.63107	4.49597	1.65122	1.67454	3.50992	1.8012
1.78475	2.16423	4.29262	1.22317		1.54704	4.07523	4.39571
3.36811	1.86133	1.46533	1.82023		2.27606	1.58661	1.62434
2.08221	1.53179	3.8131	1.50504	2.46404	1.18181	8.73006	3.72258
2.97073	5.05947	1.4499	1.41274	3.97582	1.24885	3.2954	2.24672
2.39458	3.3501	5.0809	2.04901	1.60458	1.96055	4.1637	2.80145
1.96374	3.91114	1.69726	1.03663	4.44786	2.00334	1.37637	1.42114
3.16563	2.51218	1.67529	2.43512	1.62952	2.65517	1.78424	3.85542
2.88798		1.59744	1.88711		0.744981	4.25062	5.97381
1.23482	2.42369	4.66879	1.93239			2.4054
1.47562	1.06504		3.06751	2.11857		1.81646	5.62062
3.42627			1.00122		1.32084	3.63034	2.59879
2.73808	2.58619	4.94215		3.4106	1.77052	1.42844
3.28518	1.1041	4.69129	3.91115		1.00825	3.76124	2.80903
1.52885	1.37054	2.25895	1.69483	2.78355		1.97391	1.42375
	2.75492	3.36441	2.02789	2.95049	4.42376	8.47053	2.03857
1.26665		1.90224	3.52045	3.81214	1.00351	3.76605	3.84532
3.84528		1.89401	2.80825	3.31011	1.67074		1.51322
2.4438	0.972491		1.23502	1.67778	0.979403	2.2897
2.5945	1.71587	2.25673	4.5797	4.54409	1.04058	2.51572
1.87116		3.93891	2.1433	5.31377	2.35434	1.50839
1.77975		2.5758	3.77339	3.48906	2.70449	4.31471	3.0418
4.54298	4.02643	5.25618	2.04978	2.88679		1.47684	1.56764
1.40797	2.48959	2.73497	1.53952	1.04075	1.20712	6.47694	2.87568
2.21748	1.82683	1.30316	1.33686	4.00149	1.20151	2.55021
3.64932	2.99189	1.11793	2.7036	1.81508	1.01789	3.19066	2.42568
1.18584	3.04435	1.48011	3.53101			6.76214	1.66815
	1.75322	3.05173	1.12892	1.32942		2.67338	4.83871
3.92828	2.22806		1.82628		2.84947	1.83982	1.23435
2.07947	2.65373	3.13483	2.17871		2.99459	2.5159	2.14106
2.29256	1.31943	3.98685		1.09984	1.91244	2.71811	2.15045
2.49825	4.54845	3.69755	4.71268	2.39076	1.57069	2.81417
2.64799	1.70927	2.60003	0.770598		1.39765	5.04653
2.8854	1.30286	1.61926	1.08608		1.93318	1.64411	3.0833
	1.72178	1.6414	2.01124	1.90931	1.14159	2.1274	1.44701
1.65225	1.11441	1.53792	1.30037	6.55325	2.57826	6.95745	1.72699
3.0724	1.1244	5.06226			2.75094		1.80498
2.46515	1.01516	1.42654	2.03671	5.2584	1.84188	3.81746
1.12755	1.87726	2.96584	2.87236	5.26909	2.63145		2.17981
2.4956	1.25208	1.42763	2.86637	7.1334	1.17063	2.23069	4.93283
4.22062		7.52032	3.22927	3.09554	1.13087	3.44967	2.81356
1.12373	1.08982	2.67693	1.11832	5.80215	2.35497	5.00941	1.45624
1.81653	1.02658	1.0729	1.64235		1.17468	5.89317	0.977058
2.55826	1.96543	4.92014		2.87715	1.31453	6.54857	4.31156
1.2599	2.64253	2.95088	3.33716	2.59977	1.77742	4.3439	3.97558
4.0574	3.93599	2.2704	0.825417	4.37482	1.79453	4.87448	1.25799
1.66745	2.20456	1.85325	2.32865	3.03181		4.67959
1.06957		2.26268	2.96221	2.9527	1.46404	4.86924	1.86973
3.33982	2.13031	6.54549	2.63063	3.47619	1.18829		1.8068
1.97498	3.23116	1.59621	1.1174	3.26464		4.40445	3.54561
	0.914259	3.20209	1.79563	3.54583	1.97666	3.23819	2.56133
2.94148	3.59289	1.8673	1.90354	6.25746	1.76814	1.83049	2.02456
	0.957389	1.67684	2.22638	6.23386	3.00136	2.1644	0.921448
2.10098	1.48632	1.19098	1.63655	2.56918	1.45342
1.25206	1.74238	3.60464	2.39749	3.49353	1.95972	1.64885	1.29018
2.35608	1.47508	1.86328	2.71882	3.16514	4.04366	2.5583	2.72469
3.3736	1.43848	6.12275	3.71337	2.03828	1.59498	1.5876	0.846324
1.4735	1.33086	4.40366	1.86141	2.88861	1.40565	3.32456	1.08074
1.30473	3.08436	4.11919	1.9864	3.34259	1.03471	4.2689	1.04531
2.53207	1.32848	1.9477	1.26117	3.17644	5.22062	2.58936	1.62151
2.26138	1.69521	3.55701	1.18751	5.69121	4.1498		4.88677
1.93432	0.853897	3.02285	1.40817	5.20801		3.5254	2.27567
	2.32069	7.60487	0.980437	3.45723	1.52814	2.27084	1.34935
0.949834	1.04215	7.91065	1.05936	3.58152	1.3298	4.21348	3.1271
3.96879	1.48356	1.39717	0.965697	2.89733	3.17259	1.53485	2.69664
	2.76046		1.06506	3.13772	0.819814	2.00956	2.39847
2.74766		2.70691		2.99196	1.22302	3.79082	0.915587
1.72244	2.03098	2.60074	2.88946	5.67066	1.68705	6.70086	2.04909
1.34781	1.09051	2.8576	1.2566	2.74356	2.1297	2.78681	2.47888
2.51293	2.69317	5.08925	1.16492	3.47847	1.16956	1.83359	2.09082
1.42395	1.8799	1.58561	1.20809	2.71071	1.52052	6.58544	2.68872
2.3567	3.51293			3.51823	3.58986	3.01598	1.86152
2.13793	1.07243	1.0264	3.64935	3.16574	2.43126	2.89496	1.13173
1.32766	3.01096	1.8349	1.88986	2.91436	2.07608	4.57566	1.29881
1.23633	2.63004	6.34124	3.02114	2.59526	2.40188	7.70963	2.01957
1.21081	1.86972	8.50754	3.98015	2.61851	2.00902	4.79364	1.31774
4.49246	2.7551		1.55446	5.48266	0.822998	4.5893	4.5967
1.24158	1.67708	3.993	0.998819	2.71945	2.92721		1.03942
2.73909	1.84449	4.33093		3.32345	3.1792	4.1804	3.46221
	1.67637	1.79008	3.56903	4.28773	1.13025	2.18533	1.17553
1.35945	1.22969	1.98327	3.43984	3.07076	2.57028		3.84517
	1.10904	1.90339		3.00212	4.13348	6.37428	1.29285
0.822708	1.33587	1.60089	2.11136	3.16161		2.24098	2.76152
1.51523	1.20563	2.45563	1.09404	3.34831	1.74672	5.27738	1.09919
1.3246	1.18998	6.9032	1.27727	2.12616	1.35644	3.25048	2.11829
1.93818	1.49932	4.73408	1.04096	2.36493	1.16562	4.95077	1.82947
1.46506	1.56595	4.81965	5.25838	2.6719	1.18259	2.49688	2.16054
2.1715	1.27196	2.77164			2.50693
0.904451	1.64018	6.5901		2.54122	0.828936	4.01506	0.992644
	1.30278	3.78644	0.922533	7.20375	1.30617	3.1426	2.57119
1.54285	0.927426	7.10049	1.07488	2.34573	5.32242	5.4683	3.51936
1.58556	1.8118	2.70805	0.979808	2.18723	1.72915	3.20184	3.04198
	1.47594	6.12534	1.8705	2.10257		1.09405	1.87615
1.20213		4.72036	1.05425	3.54511	2.13678	3.88407
1.28369	2.11916	2.96858	1.77167	5.00074	1.08342	5.27131	3.26412
		3.13968	2.609	2.46013		3.46696
1.94301	4.29756	2.50558		2.73598	2.73497	7.91055	3.96659
1.25712	2.99182	5.69853	1.31567	2.62723	3.26718	2.98035	1.07886
	4.32275	5.52506		2.71555	3.26659	2.14294	3.64542
2.28037		2.749	5.13987	1.92225	0.954663	3.82837	3.1582
	1.81504	2.56946		2.09494	3.31153	4.22882	5.22903
2.58704	1.61449	2.64562	1.54847	2.8563	4.74701	1.2383	1.62249
2.89147	0.838872	5.38285		3.24346	2.60869	1.74109	4.20618
1.88042	3.12436	3.07152	3.81534	3.33576	2.37005	4.52486	1.30535
	3.27503	3.78745	0.995557	2.97614	2.00254	3.82243	1.14897
3.07894	2.3693	1.1943	3.57414	2.61105		1.48357	0.943991
1.8872	4.89115		1.33271	2.36612	2.2695	3.17267	2.21167
2.53383	2.36028	5.5297		2.8231	1.57973	2.84693	4.71987
2.17765	2.02601	1.82091	0.99726	3.04355	1.26015	4.67049	0.73057
1.68983	2.36502	3.57257		2.83405		3.2541	2.62977
1.59943	1.13352	1.4249	2.75094	3.59401	0.910881	3.28647	4.24328
1.28653	1.72548	1.55401	2.30362	2.53192	4.69364	7.92066	0.957278
2.87139	0.868825	3.92067	0.960301	3.06895		1.40739	1.59247
1.17178	3.61788			2.93216	1.71867		3.7995
1.01833	1.83265	1.32604	1.71298	2.96315		2.37712	5.29032
2.75994	4.73124		1.43498	3.18706		1.72125	5.74558
2.06217	2.79144	2.27641	1.72213	2.72391		2.14714	2.63644
2.01929	1.01808	3.58131	3.08283	2.88847	1.10323	2.63544
1.5517	3.29525	2.31155	1.7241	3.35398	2.02814	3.19992	3.45044
0.916338	4.13564	8.29697		3.17324	0.863007	2.92836	2.06926
3.6139	4.08829	3.78716	5.26274	2.28365	1.31141	3.20944	1.4112
	1.169	4.11181	1.8967	4.11209	1.35107	3.46007	1.92036
	0.93165	3.16091	2.99512	5.97098	1.00069	6.00804
4.24287	0.967927	1.36532	2.32783	3.05099	1.81935	3.51108	2.81896
1.25093	2.18879	2.58337	4.35495	2.90859	0.988535	6.70592
1.57254		1.2156	1.71316	6.18068	3.12704	2.18251	1.05707
1.34323		1.42167	0.971408	2.93678	0.780985	6.14331	2.28094
2.65533	1.53527			3.55975	1.69479	3.9034	2.67047
1.59295	2.55233	1.8642	1.20834	2.23625	1.30571		3.0686
0.967711	2.25904	4.37798		2.86835	0.858337	6.50493	0.888049
	1.00271	1.2429		3.7664	1.51815	2.79525	4.67324
1.44044	4.55985	2.27647	2.34651	2.41976	1.41424	2.13777	5.31294
2.39043	1.87102	1.63075	3.39101	3.40495	1.28896		1.81866
1.2139	1.01221	1.38924	3.59781	3.8738	0.921768	1.76416	4.01234
2.19421	2.46297	4.77171	1.36375	2.21014	4.61133		4.25187
1.92967	3.89196	3.39467	2.35595	3.86068	0.739559	7.57971
	1.22233	1.23222	2.63294	2.83357		2.56014
1.9504	1.1641	1.45501	1.59393	2.85506	2.81699	3.409	1.91778
1.04256	1.62429	1.40338	4.64535	7.50434	0.939897	2.81521	0.962896
1.55409	2.17669	1.04214		3.20111	1.30829	5.56855
2.55533	0.790373	2.92326	4.21715	2.96188	3.79847	3.73235	5.09318
2.28277	1.01306	3.79761	3.97909			3.93646
1.96819		3.41755	3.67675	2.43787	2.25903	2.7277	0.985285
1.59724	3.79694	4.20346	1.18101	3.11697	3.20595	2.45378	3.20376
2.43221	4.54326	1.48773		3.51724	4.91626	2.97978
1.60208	1.70559	1.40997		2.903	1.73584	6.59789
	2.4189		3.82765	2.22803	4.51496	2.08946	2.94216
2.08384	1.97505	8.98015	0.821327	2.84508	0.861279	3.02963
0.707415	3.04515	1.81267	4.64181	3.02126	4.71674	2.5609	4.89566
3.65833			1.94499	2.24197	0.858458	7.18362
1.09616	1.166	5.16615	1.50791	2.77435	2.83495
1.12422	5.29193	1.82358	4.88267	2.32938			2.85136
3.54106	4.68146	1.41899	3.87305	2.30109	4.19578	1.81743	5.97996
2.24401	1.4929	7.59502	2.85631	2.77126	1.58983	1.5761
2.06549		8.21704	4.22249	2.17643	4.84773	1.81748
2.69553	1.0532		3.39285	2.95411		1.72744	4.74635
2.08392	1.29108	1.24855	1.40708	2.60362	4.75001	2.0289	2.84217
1.21467	0.929621	9.25396	0.800259	2.51718		1.88287	1.22426
0.930654	1.70563	1.52654	2.29336	3.89215	0.849742	1.88503
4.35902	2.16518	5.26562	1.66659	3.20389	2.13211	1.90863	0.881794
1.00518	1.36816	1.13878	1.37325	2.77146	2.2399	1.57145
1.64515	1.66622	5.77702		2.33822	1.01203	2.01705
2.45261	0.902226	2.70818	1.3458	5.22164	2.74153	2.60455	1.04415
1.3537	2.1961		2.77577	3.75927		1.81271
3.81973	3.38531	2.04704	1.2896	2.78896	1.44203	3.13557	3.32234
2.85309	3.87097	5.23478		2.90157	0.979922	1.65893
3.19481	2.00682	2.5249	2.01689	3.15898	2.55248	3.94493
2.20666	1.23238	8.08865	3.59054	2.66096	1.40469	2.65302	1.89673
	1.25356	3.1128	1.21686	3.12832		1.37298	1.17851
2.17835	2.03772		2.80214	4.98815	1.58703	2.47545	1.17974
	1.27435	2.44696	2.74198	2.58774	2.51845	2.54391	2.40602
2.26973	3.42477	5.57216	2.81094		3.30729	4.24329	2.65981
1.41969	2.49109	4.58027	1.81294	2.52003	0.974782	4.67325	0.995304
1.95721	1.87963	7.19772	2.21575	2.81497	2.88593	1.6987	1.47297
2.76458	2.89032	1.36826	4.17091	2.59347	0.851502	3.2809
	2.85232	1.55946	1.961	2.15092	1.15896	2.26843
0.999792	1.98711	1.19058	4.26338	2.08181	4.30974	4.61592	1.0037
0.940195	1.11637	8.39925	2.01392	2.87078	0.814883	7.50854	1.74505
0.981995		2.23031	1.00703	2.27667	5.1919	2.48911	1.49476
1.82212	1.56047		1.35118	4.12351	4.12377	2.91863	1.2337
3.746	1.25791	3.858		2.69349	5.38203	2.22711	1.10448
1.45333	1.11627	3.15969	2.89289	2.00732	1.11122	6.29934
1.5396	3.48851	3.36466	2.05871	2.14155	0.860647	1.4657	2.16648
1.74151	1.43064	6.84347		2.77877		3.47661	0.892562
0.840786		6.90039	2.52818	2.35013	1.42135		1.80802
4.52999	1.06005	3.99721	1.93171	2.1308	1.26696	3.51224	1.08268
2.06268	1.07618	1.47307	1.54348	3.23503	2.26219		1.78373
1.52092	1.37667		5.17376	2.86397	4.57087	1.81841	3.44368
0.900481	2.0641		4.17417	5.84206	1.75439	3.22101	2.86738
2.0575		4.04557	1.68182	3.25723	1.11966	4.80767	1.76979
1.01896	1.10941	4.50287	4.32711	2.23083		3.09913	4.77333
2.24878	1.41114	1.07299	2.46934	5.36913	1.62775	2.72588	2.54101
2.68194	3.39013	2.04061	1.74566	3.25258	1.84997	1.46209
1.86577		1.2701	4.58989	2.23236	1.66498	2.84989	3.72294
1.93072	1.21854	1.98065	1.01684	2.11618	3.0116	6.4447	2.71239
	1.59963	3.95992	1.54221	3.85032	1.54206	3.1814	1.11303
1.97433	2.25863	1.1193	1.02089	2.39411	1.28638	4.95097	3.70408
0.879714	1.29642	8.19463	1.25264	3.60927	2.27266	3.43638	1.24656
1.02617	1.15182	4.18789	2.55904	3.08621	1.55389	1.56702	1.7592
3.53806	4.97096	2.7666		3.00667	2.19952	4.63139	2.63629
1.14475	4.66146	2.49627	1.56479	6.43406	1.43664	3.44655
1.27689		3.11121	2.37868	2.65053	1.08749	3.19367
2.90567	1.59214	4.60381	2.8228	2.50219	4.2528	4.93761	3.45644
1.27905	2.22494	1.1735	2.97342	3.52402	2.84435	6.28013
0.957469	2.30247		1.50541	3.79656	2.52709	8.29952
1.10326	1.05644	8.93611	2.40508	3.39684	1.74689	1.88981	2.33179
1.45518	2.06362	1.20055	2.35711	4.22987	2.45471	3.55271
1.09815	2.77564	1.59823	3.30515	3.381	2.36188	8.04027	1.07629
1.024	1.75708	4.10806	2.71597	3.4454	1.84774	2.81924	1.71587
4.17554	1.60198	0.998713	1.65136	2.77918	3.15671	2.56179
1.13945	3.60519	1.69676	3.19954	3.00681	1.17445	2.40496	3.97911
1.12301	0.877034	1.84342	3.59603	3.48999	1.57905	4.61239	2.95893
0.845075	1.47083	2.33867	3.27966	2.80358	1.65852	1.66973
	3.35601	4.10282	1.76961	3.43366	2.54605		2.43681
1.46348	4.64982	5.65139	2.11251	2.70267	1.01348	2.39694	1.14787
1.6522	1.49872	2.73682	2.19346	1.68019	2.94624	1.80591
1.94501	1.73765	1.37649	3.49085	3.39617	1.13871	1.69251
1.00984	1.30533	2.16072	2.90366	2.55033	3.65716		1.71083
0.859416	1.37611	8.45311	1.80274	3.72202	2.05837
		3.67105	1.40323	7.11282	2.9194	2.89753	1.6194
		2.99004	3.99489	2.69886	1.71239	2.3448	1.70848
		4.78058	2.62605	3.36189	2.26799	4.39051	1.2204
3.7054	1.48368	2.22052		2.34953	1.67493	3.95421	2.38365
1.39921	1.38888	2.09484	1.33849	3.04878	1.25857	3.3612	1.55678
2.97361		5.20671	0.997532	2.49471	2.22385
3.63952	2.69805	1.12804	1.57246	4.34439	1.66993	6.92581
2.09401	1.48923	1.81612	3.1433	2.96295	1.63908	3.92841	3.41091
	3.52345	2.06262	1.44028	2.34947		4.15411
1.38058	1.76273	5.2682		3.24888	1.27117	1.77247	2.42092
2.93492	1.91359	1.97143	1.26249	3.88076	1.20204	1.81194	3.59605
	1.01863	6.87699	0.896838	6.13692		1.76335	4.1289
	1.78885	1.98685		3.29554		2.29292	1.54172
1.32121	1.10522	1.54745		2.61141	1.44973	2.24402	1.87404
1.17473	1.28139	2.92138	2.64882	2.27263	2.74777	5.99532	3.23919
	4.09777	8.74037		2.41898	1.167	2.53167	1.47512
2.65462	2.3504	1.81496	1.6391	3.10217	3.30162	3.67531
3.38949	1.53086	2.18491	3.25249	2.57742	2.26845	6.43659
3.23438	0.948511	1.46469	1.86221	2.2544	1.66188	1.37093
	2.93256	1.51393	1.05181	3.68274		1.76702	1.5879
1.84682		2.27757	1.12704	3.23663	4.1068	2.76263	1.20339
2.48617	1.85561	4.4002	0.980534	3.00046	2.49184		3.99159
3.15395		4.57461	1.09422	3.41304	1.94726	5.8535	1.76207
2.91423		3.67016	4.44373	5.48901		2.80876	1.87589
2.26802		2.53875	0.986945	3.90423	2.48553	1.90533	2.28691
0.826391	2.4834	1.91362	1.65292	2.20665	4.94026	3.13263	1.78112
1.032	3.29825	2.4854	1.63659	3.29451	5.01709	7.5289	1.35658
2.46899	1.61588	1.84101	1.78676	3.4979	1.63867	1.5709	1.82073
2.09682	3.63527	2.72609	4.98697	1.74845	1.67329	2.66031	1.36964
	1.0257	1.82416	0.99176	3.5441	2.36808	1.34963	3.35038
1.08804		1.15956	1.13422	2.20166	2.06526	5.64769	1.62176
	0.999651	1.441	4.19348	2.82511	4.96963	1.68967	3.06178
			3.26775	2.60876	2.28727	2.05527	1.43226
		1.3397	1.63718	6.18757	2.67381	2.99914	1.67717
1.80973	1.78755	6.37525	2.55595		3.28156	2.09618	2.38605
1.19495	1.73074	2.82245	4.3735	3.15477	2.47576	4.63079	1.55502
1.05804	1.19265	1.27584		2.50202	2.15395	1.79488	1.44376
	1.05877	4.12854	3.90892	4.08808		4.34749	2.98355
1.17411	1.11233	1.50292	1.48013	2.95037	1.3945	2.39005
2.138	2.71731	1.93758	0.984549	2.78406	2.46274	3.32516	1.64358
1.19836	1.24505	1.52101		2.85478	3.83321	5.37244	1.81614
0.979012	1.05929	1.15943	2.60439	2.5836		1.77581	3.62465
2.45261		1.32282	1.88285	3.16673	1.87801	1.6033	1.07044
1.33361		2.49587	1.06307	2.83813	1.11097	8.62166	2.8883
1.85865	1.78385	2.50138	1.7787	2.99043	2.33916	2.09954	3.34682
1.74405	1.74188	3.78832	1.33831	3.37848		1.56045	2.06369
1.23136	2.95971	1.34014	1.6946	3.54931	4.76987	7.36915	4.89719
2.43559	2.3067	3.2376	4.38603		3.6994	3.2401
1.95249	1.08851	4.91748	1.58747	3.10139	1.30196	1.56305	4.88005
2.17258		1.29438	1.64427	2.91827		5.98769	2.6399
3.32933		1.45749	3.77527	2.60797	2.49343	2.033	2.75783
0.862459	3.66211			4.3916	4.0379	6.71961	3.14715
2.50417		6.88777	1.96254	3.14745	1.6792	2.84326
2.14745	4.33598	1.16684			2.79297	3.16551	4.58263
3.41964	1.60766	1.85868	1.50004	2.65893	1.63389	4.95813	4.3775
2.49278	1.46464	1.80435	1.18338	2.81047	2.71986	5.28145	1.27993
1.00739	1.35065	3.60992	3.56505	3.71243	2.33719	2.91669	1.83135
1.77638	3.50099	5.86167	1.51922	2.61432			3.82558
2.55507				2.58286	1.43626	2.57026	1.55029
1.66887	1.30535	2.3761	1.57736	2.11969	2.96447	6.00087	2.00362
3.80057		3.15136	1.00197	3.29637	1.02897	2.44827	4.74844
	1.96283	2.03016	1.89484	3.61521	0.885665	4.29425	1.28319
2.9985	1.82808	1.60069	0.90491	5.03282	3.33349	2.80007	1.65625
	1.08302		1.57741	2.57854	2.23116	4.92749	3.25278
2.36719	3.09916	3.95332	1.76418	5.90369	1.70557	1.67726	2.89245
1.45951	1.33653	1.13275	1.40185	3.23464	3.77827	4.59375	2.59309
1.62652	1.10366	1.13555	3.30579	2.41705	3.35455	3.40717	1.79563
2.16769		2.15925	1.26168	2.94467	2.87396		1.56846
	1.30069	1.51177	3.02857	7.46634	1.14175		5.26419
0.930057	2.48711	2.3947		4.19271	1.22796	1.3206	3.1463
1.03523	1.08853	1.55929	1.29335	2.7942	1.2055	4.98281
	2.52416	1.5195	2.07232	2.34026	1.06664	4.3763	1.11976
1.77742	1.03242	2.34247	2.22234	3.6177	1.15162	1.62769	2.48677
1.03684	3.33439		1.59571	6.72943	2.69027	2.06642	3.45461
0.857934	3.9323	6.37113	1.06432	2.89536		5.96027	1.76103
2.13346	1.12723	1.23848		3.31422	3.67797	1.96775
	1.1046	5.11485	1.90336	2.04803	1.10817	8.89835	0.805622
0.893556	2.93158	1.59714	4.08803	4.77393	1.57321	2.78444	4.15595
2.56455	1.94749	2.04168	0.892574	2.60562	1.19099		2.16906
2.16112	1.38397	1.29294	1.59377	2.82002	3.71217	3.84155	1.28175
3.70499	2.91157	1.78833		2.69618	1.48099	2.64774	4.30217
2.66139	1.0895	3.56045	1.14388	3.27587	3.48102	7.91296	1.486
1.02694	3.12563	2.74748	2.79865	2.80059	2.31146	4.34494
3.94444	0.857805	8.56999	2.54937	2.57665	0.764435	3.46746	3.67603
1.43738	1.07697	8.3984	5.48927	2.30792	1.72439
1.65027	2.80409	6.01783	2.3412	3.03684	1.29602		4.60581
0.928505	3.34607	1.27839	1.78716	2.75288	2.60729
3.73829	2.16232		2.93021	2.62856	2.23482		3.43032
1.35227		1.75491	1.62233	7.03856	2.37206	2.70556	2.98412
2.75474	3.64144	1.3341		2.28316	2.28233		3.82768
1.06673	1.88579	3.65289	1.51295	3.92736	2.63828		3.80462
2.62828		3.31583	3.4578	2.52339	2.76057		4.07753
0.840158	2.47738		2.67609	3.5344	1.01018	4.36429	3.92068
	3.90473	1.46936	2.66184	3.17243	1.16477	8.18903	3.86296
2.68669	2.59179	1.2648	1.37357	3.01967	3.68476	2.78213	4.88074
1.70099	2.07774	2.05235	2.07753	2.47191	1.47955	3.60471	5.51295
	0.869033	4.06775	0.819423	2.55952	2.89842	6.66289	0.987052
1.58537	3.23892	1.74145	1.98571	3.1689	4.38529	3.60432	3.30528
			4.60616	2.20052	3.84783	4.34814	3.63111
1.48453		2.49832	1.66734	4.12268	2.51894	7.47485	1.04853
1.47408	1.75696	5.5003		2.95001	2.09011	4.08168	1.14064
		1.67051		3.00501	1.327	3.73014
0.974364	1.09901	1.03106	1.13411	2.76229	2.09545	2.6047	1.51673
1.69764		1.61226		4.55594	1.02592	3.07711	1.899
3.39005	1.76506	1.46196	1.5052	2.82951	1.08205	1.57432	2.16479
0.83471		5.63279	2.1971	3.19155	4.2032	7.17228	4.72834
1.63245		1.45371	1.07189	2.68607		1.57856	1.0485
1.37119	1.10046		1.44123	2.8944	1.63713	3.94028	1.87761
3.72595	2.89798	2.45813	3.47507	4.79594	1.44979		1.85416
2.57296	3.27071	1.59973	1.7014	5.77734	3.74184	2.64064	4.88686
3.69119	1.36317	2.14128		2.91999	2.27088	2.56858	1.12941
1.2029	1.8424	1.5731		3.17849	2.59208	2.54447	0.971762
4.33694	1.05691	3.76614	2.17826	2.91458	1.27479	5.75886	4.65294
	1.32139	3.12771	0.998739	2.35313	2.17608	6.4006
4.22882	1.55577		5.0364	2.32267	1.51993	1.99163	3.58484
1.47527	1.15503	1.26747		2.72345		6.8218
4.10857	1.15526	1.16399	4.87395	3.06903	1.97386	3.90334	2.76172
3.79264	2.35992	3.49328	1.5509	3.43151	0.96914	2.56564	1.37514
		1.42431	0.744115	4.52933	2.69335	2.43252	3.09941
2.31373	1.69767		4.27975	2.82355		3.38526	3.8667
1.38072				2.61325	1.29835	6.04827	1.47987
0.92984	1.38738	5.59399	3.73662	2.78269	4.15788	4.39967	2.59429
3.22548	1.46928	1.55813	1.19552	3.11126	1.20228	5.83986	1.60973
		4.55239	1.93001	3.38119	0.952319	6.95656	1.35321
1.61539	2.22179	2.08822		2.33668	2.30276	2.40335	1.03448
1.16641	1.10154	1.63972	1.77048	2.2885	3.58893	2.51068
	4.97144	1.93811	3.94255	3.74343	1.67565	2.00467	3.90202
	3.62524	1.83633	1.7652	3.83512	1.60874	6.7307	1.09249
2.31839	2.71272	1.87016	5.04963	4.8479	1.14812	6.0244	1.27162
1.31668	1.0663	4.624	3.06355	2.1795	1.71168	2.96906	1.15214
	2.7053	1.58399	3.39804	2.94751	2.10423	4.46234	1.03396
1.04359		1.63699		2.20607	1.21166	5.74837	1.40413
3.15611	1.71298	2.36245	0.71125	3.16494	1.79547	2.47245	1.11005
1.43251		3.63986	1.26027	2.50945	1.31406	3.17273	5.73905
2.0368	1.18571	2.40411		2.77897	1.05828	4.08083	1.58597
3.47287	1.55882	2.5351	1.04644	2.29072	1.06267	5.02676	3.14884
1.16577			1.04995	2.66127	1.38672	1.5528	1.08635
2.99202		1.84428	1.14779	2.70809	1.34555	4.38129	5.56346
1.81609	1.65566	7.67933	1.07344	3.3388	2.69833	4.70816	3.15919
1.27111	1.79499	1.58505	1.43903	3.29765	0.979246	4.10529	4.5109
1.85245	1.80939	2.07644		4.47912	3.07066	2.91862	2.80164
2.4761		2.46182	5.21904	4.90007	0.793928		4.28376
2.62749	1.74094	7.4175	5.57523	2.87656	1.85287
	3.61559	1.65806		2.75564	2.37101	5.86719	6.06028
1.19317	1.94315	1.87887	2.44075	2.50936	1.34612	6.26013
3.03696		4.87371			2.68395	3.39043	1.55447
	2.8058	5.24722	1.11855	6.47945		7.43268
4.09748	2.0382	2.33934	3.78343	3.24323	0.996938	3.56569	3.40803
2.32767	1.91421	3.13678	1.60388	3.32102	4.08896	2.29938	1.19574
2.42886	5.34764	3.5729	4.59654	3.59099		5.97593	1.18018
1.69255	2.04506	2.28064		3.03499		1.96537	4.31172
	3.90584	1.55346	3.41331	3.23901	2.4066	4.96739	4.47159
1.32222	1.82137	7.04344	3.5892	2.59131		2.29494
2.62581	2.17359		1.38933	3.39268	1.38828	3.13569
	4.69911	4.24148		3.43225	1.41639	3.14714	1.79919
	1.18786	1.71412		3.05373	1.98477	1.89597	1.17808
0.701851	2.10887	9.39065		2.95074	1.3461	3.06798
2.48512	2.04938	5.08802	4.05115	3.44831	4.72576	4.40555	1.29363
		1.95926		2.55863	2.2617	2.95737	2.69089
1.56601		4.47262		3.21899	5.25536	7.5186	3.05285
1.89404	0.835974		1.85408	3.17533	2.51757	4.26337
4.2508	1.81113	5.87549	1.2648	3.33233	3.13753	1.82587
3.09795	0.991074	8.47156	0.989935	3.11096	1.29021	3.18286	4.447
1.05342	0.943565	1.98776	2.71773	3.24332	4.84021	2.35685	5.50316
0.805044	3.64085	3.9143		6.53707	3.02295		5.21022
1.25146	0.838538	4.86689		2.48622	3.49381	4.52073	1.42905
1.70155	1.39019	3.40174		2.96864	4.40229	4.9708	5.12667
	2.51295	5.18968	2.77425	2.87359	1.3693	6.60312	1.05639
1.75498	3.49114	2.33849		6.82892	1.64179	5.78624	1.11501
4.20473	1.55391	2.97996	1.14281	2.84707	1.02174	3.41539	2.40013
2.07392	1.81032	2.65687		3.94545	1.55258	1.94121
0.990583		6.95396	4.29995	3.26593	4.01849	2.36217	0.974541
4.44646	2.3292	2.83523	1.69956	3.10653	1.62436	7.85712	5.54009
1.24933	1.18655	2.47996	2.20115	3.0349	1.1559	4.48877	3.6567
1.79925		2.69317		3.28305	1.43108	2.87674	2.16009
		1.80729	1.55744	5.38506	1.65769		2.52019
1.47643	4.84943	4.81066	4.78838	3.04432	2.34179	3.70349	2.28584
1.46884	1.12232		2.31636	2.90796	1.01117		0.863735
1.65705	1.29755		1.70153	3.26984	0.941635	4.29398	2.47141
1.73774		3.69561	1.23291	2.75091	2.92191	5.19984	1.86288
2.42206	4.72203	6.47256	1.17183	2.74571	1.55384	4.94697
0.928782	1.92822	7.76309	4.64909	2.94917	2.87089	6.24146	2.449
0.703473	1.59594	2.81993	1.58234	2.91251	1.02441	1.70546	1.78895
	2.33914	2.67728	1.09961	3.54489	1.19046	2.11606
0.88975	1.06276	2.42819	0.978351	3.22837	2.02613	1.97809	1.80923
1.3956		7.0076	1.66876	3.18014	1.43781	1.88619	3.39702
0.885544		4.25799	0.844654	2.82738	2.77597	3.174
3.1433	3.70327	2.04864	1.76348	2.80479	1.54505	3.7546	2.73496
3.5783	0.97209	4.1987	1.28355	3.17162	2.55956	4.7779	1.85502
1.38153	1.71634	4.54087	3.16313	2.92156	3.4558	3.88686	2.26676
1.92522	1.02977	3.08794	1.2899	3.34806	1.24516	1.82123	4.52956
2.98314		2.16004		2.95274	1.37865	2.55431
1.4485			1.77206	2.9666	1.83184	7.27484	2.13324
3.38289	3.26374	2.03861	2.56717	3.17692	1.21706	2.02545	0.85652
	2.46925	3.23391	2.56811	3.34551	1.42828	2.22336	4.63745
3.58604	2.16395	7.21313	1.69698	2.90861	1.25115	3.48535	0.967043
	2.29327	3.17135	1.2697	2.96552	1.34431	7.10266	1.19705
1.80204	1.1147	3.08575	3.19555	2.60824	1.32732	2.45947	2.54213
	1.88814	2.90656		2.5762	1.00172	2.811	2.6708
1.19957	1.95963	6.34249		2.29227	2.0816	2.11551	3.08745
2.98502	2.32187	2.22019	3.56363	4.07533	1.87361	2.51567
1.93821	1.95422	3.01899	3.72146	3.13469	1.90077	2.78558	1.30704
1.82566	2.44425	2.93981	4.84559	2.59096	3.05084		0.851673
2.49917	2.95863	2.14608	0.873204	3.25737	5.42369		1.9465
3.27542	3.41285	6.53052	1.17967	3.91837	1.61261	3.3083	1.10972
3.54431	0.722124	3.01908		2.99899	1.26072	5.30349
2.05128	4.3153	3.59558	2.69551	2.88073	2.75551	2.77602	1.87154
4.1892	1.35268	4.54999	2.24591	3.33275	1.37768	7.92291	1.66766
0.861541	2.17031	7.80221	2.49603	4.68051		2.72708	0.962044
0.997686	4.38265		1.06087	2.67097	2.13423	4.9865	4.99392
0.914866	1.20183	3.51146	1.30898	7.41611	2.22019	4.29258	2.04445
1.12981	1.19616	3.49598	4.17406	2.69352	1.64558
1.40698	3.89368		2.00015	2.82891	1.17548	3.19829	1.8974
3.11592	2.55511			2.59646	1.13589	2.80818	2.6766
1.41275	2.38692	3.01363	1.08358	3.23013	1.22974	6.42692	1.95088
2.99329	1.73162	3.13068	1.49235	3.20011	1.3437	1.86018	1.89668
0.975948		3.27729	1.03201	2.78962	1.4069	2.10748
0.805036	1.337	6.01725		2.45056	1.46602	2.5311	1.60361
3.34083		3.71617		2.83889	2.59709	5.18647	1.89542
2.08364	1.27612	2.31269	1.13178	2.38432	1.51923	2.69686	1.82281
	0.949465	2.34987	2.07655	2.85294	1.58489	2.56778	1.54784
2.27242		3.50227	1.15565		1.36592	8.27537	1.17893
2.05173	1.46024	9.24151	0.728624	2.62815			1.21126
3.12431	3.15537	2.16618	0.898246	2.97517	1.54985	2.79843	2.33604
2.42519		3.72381	2.53641	3.21998	2.8201	4.30333	2.70577
2.92033	0.98662	8.724	0.935431		2.21131	5.93777	1.00842
2.40033		3.56021	1.81713	2.58231	1.83487	1.84375	4.84654
1.07084	2.53161	3.26341	1.38642	2.85467	2.52267	1.8756	1.5586
0.907554	3.7896	2.36574	0.913535	2.97882	2.22069	4.14388	1.01468
3.1312	0.956286	3.73151		2.79704	1.20322	3.65097	1.25741
1.64427	1.65163	1.77498	1.53632		2.30081	3.86013	1.57841
1.54853	0.964287	7.47162	1.19165	3.12608	1.54208	1.79837	1.00339
1.83865		1.47657		4.51759	1.61165	1.80086	1.22412
	0.917731	3.10869	1.00761			7.54776	1.32852
1.08896	1.10532	3.04436	1.09619	2.90311	2.81836	1.44821	1.80202
		2.82454	5.19611		1.76173	3.79344	2.84574
1.45951	3.13646	2.75806	4.12842	2.88728	1.07952	2.67897	1.84175
1.51543	1.87683	2.67156		3.56132	3.09346	2.93048
1.71424		1.50544	4.48015	2.022	1.31023	5.57743	3.3097
1.77578	4.9741	6.05816	1.56081	3.08976	1.48091	2.30289	4.57339
2.79288	1.62504	2.43084	1.7256	2.41392	1.41447	2.56244	4.9606
1.3101	1.72325	2.68818	3.44861	2.99787	1.85095	1.69057	1.15591
1.19465	0.997395	1.62676	1.56373		1.41357	2.83585
1.15016	2.68128	2.58555	1.09861	2.69013	1.73219	1.75002	1.08097
1.35068	5.14853		1.44187	5.12547	2.04676	7.21905	1.14302
2.44903	1.69035	2.95433	1.69056	2.29317	3.48212	2.66115	2.30923
4.21005		4.54086	1.03809	4.15276	3.93608	5.46144	2.7247
1.66077	0.912713	1.81357	1.28255	2.54394	1.97999	1.42205	1.16259
3.22848	3.70013	6.24341	3.72832	2.87925	1.71092	2.54808	3.24842
	1.16941	2.038		3.67372	1.46101	2.04071	1.76644
1.1967	1.38308	3.33735	1.04825	2.95969	1.38431	4.70004	2.09674
3.60457	2.58231		2.04518	2.67244	2.81947	4.6578	2.35614
1.48293	2.86379	5.04261	0.798197	2.58806	1.71053	4.89648	2.40229
	1.01886	9.24705	1.68541	2.73591	1.95402	6.5207	3.5091
	1.82983	6.63929	3.62834	6.22407	2.91034	4.47891	3.96271
1.10631	1.21229		2.41663	2.34169	1.46979	3.4124	3.05173
3.10093	2.2983	1.52567	1.66563	2.33482			2.28892
1.75019	1.54504	4.85485	2.02087	3.05868	2.22864	6.33164	5.28445
1.14792	4.75795	5.20573		2.47675	2.2739	1.95587
2.15157	1.19225	1.76585	3.67922	6.94373	3.43813
0.857906		6.7014	5.08546		3.77582	2.60465
1.69712				2.4474	2.73003	3.8847	1.81493
0.969004	1.30533	1.38725	0.894321	5.93973	1.58873	3.83631	3.68982
1.60421	2.05042		2.71922	3.28836			5.6554
1.26572		2.32328	2.99786	2.37652	1.32762	2.56037	1.96854
1.03228	1.59152	2.10563	0.791018		2.18559		3.48927
3.06748	1.8112	1.95355		2.68049	1.6345		1.6689
1.13056	3.60815	2.05438		2.86018	1.25767	2.53642	3.80046
0.95403		3.13736	1.09728	3.01174	2.41472	2.38378	0.821882
1.61662		7.93612	1.05865	4.07526		1.77988	2.6308
1.1	1.59054	3.21396	0.806347	3.28608		1.61678	3.86058
3.49037	3.41075		1.56492	2.30843	1.85391	1.88161	1.88224
0.957671	1.48476	1.46987	1.72176	2.39035	1.36354	6.07227
	1.07569	2.52436	4.22053	2.92166	1.96169	1.57401	2.92445
0.888926	1.62717	1.70649	1.42586	2.73839	1.7476	2.53485	1.31763
1.12292	1.69433	1.22001		2.81671	2.04781	2.42081	4.03425
	1.91241	4.94126	4.4021	3.20144	4.70539	3.77388	1.63276
1.4935		2.20845	2.47821		1.44554		1.82864
1.2458		1.68962		2.7158	1.66025	2.09354
1.12802	3.58354	1.51758	2.78492			4.18863
0.887932		4.76544	3.18052	3.20139	3.15219		1.11976
1.6722	1.34605		3.7009	2.4816	1.3041	2.71365
0.976798	1.4912	2.12887	0.961543	2.78521		1.67166	2.20028
1.94238	1.8522	2.32629	3.86111	2.91111	1.94781	5.43583	2.27611
1.52718	1.63056			2.91499	1.34907	1.88741	4.52259
0.976588	1.9635	3.29682	3.34476	2.20633	1.71123	1.6604	1.57399
1.28614	1.61323		1.06018	3.18576			1.67911
1.99406	1.37305	1.29723	1.94885	2.76206	1.25169	7.53558	4.53234
1.13262	1.26571	3.26835	3.04991	2.68933	3.52708	2.51453	0.755216
1.47083	1.97688	8.2419	3.81761	2.57681	1.72432	3.2603	1.12314
1.44626	1.61911	3.33129	2.93404	2.18316			4.08654
2.00214	0.74606		1.62782	2.55947	3.97308	7.01767	2.23429
1.27861	3.70866	3.62777	4.41062	2.89425	3.62041		2.93077
4.30009	1.87607	3.294		4.74386	3.82797		4.04587
1.12046	5.18877	3.45263	1.87558		2.42542	2.0493	2.58756
1.44889		5.43447	1.16396	2.31561	1.92141	4.18065	2.3266
1.13768	4.14377		1.82885	3.19459	2.40295	2.24076
2.04513	2.4029	4.63357	3.78021	7.54927	1.93778	7.6201	1.46842
1.58226	1.93827	4.84533	2.25707	2.57385	2.29801	4.9824	2.32908
1.57501	1.42999	2.19663	2.94042	2.37966	1.28746	4.80606	1.98049
4.25737	1.0124	4.0799	3.32138	2.16074	1.35812	3.68768	1.96073
1.1242	2.0886	3.43627	2.4634	2.8845	2.50838	5.19513	2.13076
2.74181	1.13047	5.41223	2.08333	3.59091	2.02392	1.82975	4.18293
	2.33912	2.07459	0.993585	4.43909		7.15886	1.3962
0.889181	1.63466	2.65996	1.91957	2.13382	1.88623	1.31607	1.63201
3.46499	1.3399	1.45569	2.75586	6.20122	4.92292	2.50102	2.70739
1.01861	1.19593	1.85772	1.49152	2.22723		1.61716	4.06261
3.08902	1.11926	2.79453	2.77187		2.8232	2.01401	1.01117
1.43219	2.60305	5.65741	2.48119	3.17804		5.27388	1.52867
	1.23367	1.99739	2.82052	3.02016	3.99549	6.20936	1.60992
	1.71021	3.90837	1.99807	5.11555	2.46504	1.48331	5.28511
1.49949	1.77021	1.64737	3.95926	2.58853	2.64465		2.4212
		3.70476	2.01755		1.0392	3.13279	1.86515
	1.60667	4.56488	2.3019	3.80193	4.89746	3.30878	1.39979
1.30833	2.11378		1.59359	5.11891	1.53519	2.12354
1.24061	2.41767		1.85572	2.07049	4.29361	1.99379	1.68464
2.57218	1.16793		1.62421	2.51168	2.11814	3.69207	1.55757
	4.23609	8.83214	1.77336	1.44849	2.64246		1.49534
0.690915	1.09807		2.04447	1.56121		1.94049	1.74142
1.49191	1.00799		1.82919	4.66605	2.13737	1.93617	3.61957
1.89377	1.60745	2.14548	2.76117	2.68189	1.73648	5.99027	4.35607
3.28039	3.13988	1.79613	3.46216	2.33868	2.01431	5.65281	1.94069
2.89014	2.48274	2.09757	0.980111	7.18267	1.25019	5.4221	2.72638
2.8303	1.14002	2.99069	3.14333	1.75843	2.3435	2.80056	1.3679
0.972518	2.77081	3.63411	1.78542	3.18341	1.42985		4.48348
1.63736		5.83453	3.38426	2.78102	2.61454	2.60516	1.54761
2.34521	1.20912	1.76386	3.16106	2.01571			2.49685
	1.36658	2.07234		4.55128	2.63782	2.76235	3.08174
1.06503	0.933064	1.73601		5.82667	1.43003	3.21618	1.39586
2.30922	1.14897	3.24826	3.26369	2.98336	0.949345	2.03824	3.10608
0.874466	1.94237	4.81063	1.70862	4.68733		2.34582	1.74596
1.25062	2.43045	2.8562	3.52587	1.5812	1.98802	3.20901	2.65182
4.27465	2.01273	3.56113	2.02654	2.63216	1.58003	2.09241
1.30674	2.89835	3.70242	1.53791	2.93078	1.95386	1.61434	1.63285
		1.43405	1.77615	4.96654	1.42826	2.34968
		5.18585	5.62304	1.97105	1.64963	5.38693	1.1001
1.55498	0.8407	6.2033	1.28561	5.0703			1.84212
1.09885	1.58808	5.77776	2.01707	1.9627		1.62434
		3.72325	4.24839	2.24659		1.5669
1.37674	5.33578	1.30418	1.58833	2.55188	2.96779	2.27848	4.14845
1.46806	2.75183	7.49042	2.89911	4.4463	3.39171	2.49471	1.14551
1.33728		2.44754	1.14456	3.16673	2.16129	2.54889
1.84788	1.16196	2.68651	1.86034	6.70936	2.49836	3.44188	4.09102
4.30945	1.61381	4.76678	3.85134	3.88428	4.15998	4.14346
2.2808	3.78334	3.21688	2.20228	2.50172	3.77774	2.30565	3.11543
2.86518	1.32271		2.1726	2.21019	1.78061
1.82158	1.54566	4.71883	2.15178	3.13297	1.24915	3.13553	6.31083
3.81979	2.32332	1.76592	1.88505	2.93563	1.45295	3.41203
2.08901	1.75644	1.90701	2.61552	2.6081	1.63013	1.45144	1.21181
	0.89192	2.52644	1.95779	2.05687	3.93689	2.98407	2.0918
3.66697	1.2229	2.46521	1.74537	2.56117	2.804	4.90138
2.70413	2.67797	8.78157	4.79237	1.60524	1.29963	2.33428	2.05432
	1.38481	1.8577		3.88397		7.07582	3.28825
2.45183	2.28435	4.90919	0.896157		3.03194	2.01891	1.25084
1.31169	1.19916	5.17517	2.09055	2.52796	1.19912	2.44077	1.9908
2.07896	1.10953	1.99623	1.34333	2.85202	3.27048	5.64573
3.68196	1.28289	3.22123	1.80605	1.78721		3.6919	1.36846
1.89742	2.42262	3.01906	3.00458		4.78676	2.59008	1.50327
1.4088	1.50957	3.20329	2.63931		1.14118	6.56452	1.50526
2.19332	4.4771			2.50349	1.35369	2.27764
1.19589	1.00405	6.08759	2.86074	2.31036	1.521	2.08748	0.856696
1.65117			2.93493	4.68632	3.13153	1.52201	2.65785
	3.58864	2.93256	3.40708	2.30336	3.08041	2.27507	1.73387
1.09817		2.65018	1.7203		1.2199	2.78144	3.88012
2.25716	1.3073	2.22683	3.24793	1.60541		2.58619	2.70198
4.44527		8.63421	1.15986	1.8479		1.83759	1.52431
0.993572	1.57037	5.20975	2.39561	1.57409	1.49017	1.63468	4.09682
4.20586		8.79915		2.25693
	2.81219	2.56492	1.88007	1.4479	1.40475	3.70979
2.91371	1.62322	4.43401	5.24145	2.33532	2.74507	8.24068	5.96542
2.78121	0.857717	2.94455	2.82971	2.9293		2.61471	5.564
0.984774	1.04746	5.7465	1.7575	2.50898	2.20636	3.09897	2.49634
3.04454	2.02681	1.62117	1.2398	1.71315	3.01541		2.19494
1.9029		2.50335	1.69624	1.79495		3.38131	1.91307
	1.69506		2.25953	2.89712	1.62745	2.27703	1.81051
2.50399	3.06801	2.69	1.76724	4.69991	2.5014	7.24721
1.53894		4.58987	2.6012	7.24952	1.27037	2.17406	1.47322
2.22348	2.18952	4.74875	3.48126		3.03742	5.16262	2.61311
1.64079		3.96395	1.50987	6.52037	2.78415		6.17102
	4.2716	3.43177	1.85244	2.114			1.30292
1.6753	2.01945	2.78647	2.60293		3.82079	2.24536
0.99572	1.14813			2.86425	2.3272	7.72472	1.55951
1.56347	1.10116	3.69519	2.51177			3.22452	4.18535
	1.06588	8.62548	3.60851	4.56275	1.26844	3.62474	1.41466
4.52486	1.09423	8.29967	3.20354	2.85225	1.24903	2.31014	2.00552
3.30987	1.62612	6.11447	2.60235	4.46884		3.39293	2.19649
	2.43182	3.53324	2.75992	1.88169	2.98271	8.10376	1.70537
2.11732	0.826352		5.00144	3.72068	1.64572	1.98047
1.95641	1.91543		0.870817	1.92589	3.3579	3.31818	5.72247
1.18066	1.61311	3.60454	1.96999			4.04035	5.47798
1.77608	3.62908	3.89396	1.45782	1.96138			1.97622
	1.1261		3.89118	3.15128	1.60374	2.55122	0.995762
2.58918	1.07523	4.01495	4.99347	1.54782	3.13841	2.84728	1.16547
	1.37693	3.34958		2.8944	1.41604	4.81912	2.60661
4.18664	1.00564	1.93768	2.88207	1.59509	1.61092	3.29756	1.74219
1.76314	1.16718	5.91629	2.99696	1.87285	1.11367	6.07862	4.91428
1.07822	1.45136	5.21254	1.21948	2.18626	1.22022	5.72525	1.43024
3.90022	1.35543	3.34373	3.08499	3.37995	3.18631	5.08938	1.79863
1.26014	2.35501	5.62706		3.05187	1.73036		1.36178
1.39624	1.13641		2.05011	2.41615	1.46815	4.46315	3.46791
1.02889	1.4015	4.5827		6.60409	1.27234	6.34451	1.29436
1.99789		8.60983	1.4624	5.57808	1.73137		4.30503
2.40581			1.10185	1.58255	4.62498	4.21879
1.5591	1.06523	2.87583	1.84344	2.88011	1.47892	5.08258	2.32762
2.97644		4.76751	3.08716		1.96975	3.78449	3.83793
	3.21686	1.94521		1.66833	1.8252		1.37338
1.95872	1.29274	2.38093	1.71907	2.97862	3.05967	6.64619
3.64878	1.28263	7.02083	1.6327	3.00669	4.94848		2.08394
1.52692	4.67474	2.93066	4.08102		4.33733	3.56607	1.61294
4.27479	1.99959	3.79555	4.83351	2.68828	2.28361	3.73642	2.82875
		8.54102	2.00588	2.0515	4.61875	1.95377	4.78711
4.26367	1.45314	1.61781	2.72428	2.08882	1.94829	2.03927	1.46949
3.84558	1.29349	5.49711	3.64898	2.27445	1.67089		1.82009
1.54574		5.26035	1.41322	2.95013	2.73522		3.19638
3.16321	1.52131	2.17666		2.37112	1.29923
1.1207	3.50646	1.39837	1.59013	1.86231	1.2608	1.8914	2.5239
		6.62852	2.92553	2.07659	1.15885	4.44898	6.23462
1.12552	1.22255	2.16243	1.62326	2.95657	1.21388	6.83932	2.10723
1.39895	2.79027	5.17255	2.89584	6.90729	0.918671	8.05118	1.39693
1.4227	0.964306	7.64938	2.84621	2.5952	5.05224	2.83799	1.60608
2.79292	4.41883	9.17568	1.65004	4.81266	1.55453	6.81266
	0.920711	1.42414	1.39077	2.72104	1.99036	1.5413	3.02689
	2.22972	1.67673	2.88545	2.6074	2.32048	4.04485
1.77026	1.55686	3.34703	1.14466	2.66332	2.15189	3.015	1.7287
		1.83278		2.38296	3.77006	4.26972	2.8095
3.30665		3.87782	1.73549	4.18697	1.18682	1.46969	3.11438
	2.16822	2.9984	4.09373	6.18145	4.41225	4.67121
1.50486	4.37114	2.30815	1.28779	3.18449	1.76724	2.49525
2.21684	1.16241	7.69917	4.75176	3.36655		4.27152	1.18574
2.40618	1.01703		1.71821	1.86091	0.850197	2.638	0.927243
1.17117	1.04803	1.64374	2.81936	3.36508	1.67452	4.48727	0.929212
1.07549	2.55884	1.6058		2.34272	1.07286		1.62408
3.91538	1.29797		4.73965	7.12651	2.40906	6.13215	1.60736
	3.89067	2.93926	3.0834	3.71813	3.02725	2.55292	0.876334
2.01816	5.07473		1.38411	2.29999		4.70173	2.87718
1.38681		3.28717	1.75402	2.06187	1.23815	7.0568
			4.23535	5.09567	1.02202	5.76947	0.887207
	3.33998	3.23009	1.72359		0.786545	3.30316	1.80459
2.01959	0.978485	2.84517	1.26016	1.87421	1.38559	6.68072	3.6584
2.80526	2.42473	1.62741		3.54457	3.45481	6.02456	1.41586
1.50653	2.96594	1.73025	2.47239	2.45408	1.2407		1.30106
0.80955	1.11131		2.39449	1.80786	1.26848	2.51944	1.62814
0.910429	5.33522	6.06488	1.08023	4.58857	1.19767	4.75845	2.82216
1.04612		2.82345	1.72083	2.2356	1.04364	1.89813	2.26759
1.38397	1.02882	1.62431	2.76876	2.87403	0.835681		3.57654
0.969618	1.14206		3.12449	2.51165	1.4125
1.97028	2.53511	5.25332	1.63792	3.00023	1.95112	4.58381	0.894941
1.04597	0.89879	2.07691	1.64922	6.48534	1.17796	5.17372	2.00702
1.41857	1.44814	2.82066	4.6346	1.98008	1.19915	2.33485	0.911831
1.77625	0.812386	3.38521		2.37468	2.16679	1.98987	3.72131
1.94451	1.09131	6.51088	1.79931	2.25301	1.38143	1.24769	1.49187
2.01725	1.68328	2.16285	2.42996	2.3838	3.71932	2.31286	1.04798
1.0558	0.703721	2.51991		3.9578	1.40101	3.29703	1.27934
1.184	1.98557	1.72218	1.7403		1.46072		2.49754
1.39579	1.37308	6.60021		2.35626	1.21714	6.95854	5.88245
4.06078	1.3179		1.42369	1.49782		8.30969	0.885914
1.31919	0.950866	4.15617		2.08573	4.14815	3.07533	1.77048
2.66449	1.37583	4.78012		3.73815		2.61975
1.16047	1.79848	2.73084		2.83089	4.09891		1.1754
1.1293	3.2113	2.88139		2.4273	2.04275	4.56295	2.14492
3.43778	2.5898	1.31473	2.36865	1.88763		6.33537	1.08434
1.16206	1.69708	5.80979	3.52488	1.92384	1.33307	5.46689	0.888916
1.4563	2.42128		1.72803	2.90517	1.06479	2.32156	1.33611
1.654	1.58559	4.66598	3.28732		3.53187		1.52654
2.14205	4.55333		1.44873		1.29678	2.44761	3.12541
1.06162	1.09057	4.32989	1.14269	2.1739	1.61798		2.11202
1.22699	1.42037	4.91246	1.195	1.99345	2.45095	2.07538	1.40581
2.58527	3.07604	4.93585	2.06402	2.78605	2.00873	4.18813	1.14113
4.4857	2.44305	2.75407	1.36	3.55824	0.989062	3.21585	2.63256
3.43819	2.72133	5.77953	1.72541	3.18064	5.26053	7.37569	1.3305
1.54091	2.19151	2.53069	1.31026	4.02039	2.71844	2.85164	0.790694
1.09267	3.91196	1.79892		2.76076	3.43667	2.73114	1.99425
1.41452	1.88191		3.923	3.27264	1.42358	2.69941	2.16666
1.39225	4.09253			4.10329	1.4627	2.97279	4.68429
1.29815	2.08317	3.42308	3.42792	2.31675	2.56027	4.90701	1.34718
3.18905	1.17965	9.48535	4.80062	5.04984	2.81768	2.67813	2.389
	3.08625	6.73214	1.17021	1.58068	4.76598	1.96356
1.25086	2.02134		1.70567	2.05986	4.16616		3.8769
1.53889		6.55447	4.59341	6.82388	1.05022		1.17643
1.90932	1.64482		3.13458	2.34447		2.13754	1.09084
	1.25637	3.70696	2.53948	3.37167	1.23169	3.31256
0.89745		2.63122	2.08828		0.899546	4.05364	0.88588
2.58571	2.20288		1.52762	2.17727	2.95504	7.02417	0.944656
2.0723	3.93683		1.57583	4.25359	2.24635	7.11136	2.25139
1.11749	0.995845	3.96446	3.98566	2.28991	2.50284	7.18986	3.68513
0.99611	1.04066	4.92535	2.34203	3.07087	1.96306		1.28982
		4.36954	1.04694	2.92159	1.74899		0.979235
1.51401	1.65448			1.67836	1.4542	2.05128	2.58711
1.3675	1.02172	1.395	2.5235	1.39305	1.60766	1.59927	2.49623
0.89489	2.81932	5.62263	2.63519	3.45477	3.74631		4.68884
3.81822		3.51329	5.39411	1.84667	2.67322	1.61535
	3.31488	5.10334	3.94222	2.3652	1.48816	2.89217	2.60585
			2.18782	3.14377	1.29027	3.68393	1.39316
1.00743	2.72219	5.97678	1.68827			6.74739	1.5403
1.38523	1.41076	2.6178	1.31868	1.33939	2.89655	2.65648	1.44961
3.44159	1.29469	4.25832	1.53966	2.25095	1.42889	2.02887	2.49238
1.42947	2.00642	8.09278		3.17154	1.06419	4.88283	1.96842
0.968128	1.42472			5.30761	1.79544	2.08637
0.87408	1.62278		3.43008	3.21	2.10108	1.84775	1.5149
2.07044	3.80748	6.40317	1.09464	1.45787	1.44093	5.86335
1.83654			1.72931	1.93475	1.14598	1.97019	1.57864
2.0474	2.35556	2.03604	1.3722	2.71764	3.01181	3.66158	0.86307
3.27924	4.10193	2.28238	1.91442			1.66618
2.29366	1.51591		1.45442	2.1489	1.70231	1.67295	1.89729
1.81311	1.58071	2.69634	1.50741	3.60561	3.47123	3.79827	2.34647
1.90701	1.61485	4.03962	1.66078	4.02894	4.80508	2.44281	1.01913
2.39302	2.9321	7.58117	1.36468	3.70831	1.55935	2.77045	4.85656
2.64164	2.34825	3.98646	3.01064	5.27128	0.885155	1.51367	1.1079
1.24347	1.16694	1.89174	1.85462	7.45814	1.63971	7.99536
1.00174		5.71339		6.45712	2.95063	4.66917	1.90079
	2.1204	2.60069	2.28993	1.39984	3.07747	1.72775	2.35216
3.7693		5.30114		1.44661	0.882613	5.84645	1.36707
1.35957	3.40255	3.31238	0.92076	4.59469	4.52838	2.88895
1.60847	1.86732		1.55473	2.68651	4.77285		2.8043
2.27563	1.79681	2.00617	1.15594	1.63651	1.44587	2.54764	1.22065
	1.50906	1.83745	1.51185	2.00637		2.17645	0.998333
1.5704	2.11662	1.65769	1.55077	2.43947		1.73878	3.19875
	2.01113	6.51874	2.18216	3.10741	0.773453	4.86398	3.71846
4.00651	1.37847	1.81922	3.23481	3.58067	3.33766	1.96645	3.13245
1.97053	2.17356	3.2575	2.76662	6.34843		2.12599	1.85054
1.35556	1.8146	2.88512	1.50949	3.02729	2.15212	2.88468	0.879534
1.20774		4.51616		7.08007	1.25312		2.41594
2.26784	4.82901	6.62413	1.5453	2.11545	1.22251	1.6476	0.797623
2.53228	2.29465	2.74038	1.84738	1.85931		2.88718	0.874296
2.06192	1.52685	2.5653		3.31251	0.907411	4.41411
0.785022	1.90635		1.38239	1.8385	1.80094	1.39858	2.14761
	1.1991	7.48078	1.23492	7.35022	1.69425	2.48566	2.21678
2.87845	3.74878		3.13392	2.05446		4.01009
4.11304			2.1303	2.51574	2.81296	1.80824	0.85302
	3.05152		2.30649	3.61875	2.68621		1.08108
1.15288	1.36714	1.91766	1.58459	1.88398	1.53497	3.05799	1.4255
4.04441	1.88149	5.83442	4.43885	2.47678	1.2736	2.5872	0.841629
	2.41883	2.92134	1.19989	3.45538	1.48447	3.73474	1.92775
2.62692	1.64072	3.21458	1.72599	3.8916	0.945025	2.14367	0.901707
1.06955	2.56845	4.44009	1.8035	3.8366	1.56385	5.53436	1.13928
1.8695	1.59434	2.1993	1.2296	1.60795		1.62981	0.6792
4.05986	4.25563	6.85283		1.29657	1.87846	1.36329	3.88684
4.52365	1.24589	1.65063	1.23647	2.64173	1.33687	2.4339	2.27375
2.13186	2.60637	2.34303		5.18836		2.0421	1.81422
	1.52896	4.9281	1.19556	2.08256	1.2523	2.24344	1.44489
	1.15646	6.90689	1.05648	3.32256	4.39399	2.18451	1.3333
1.6085	2.0393	3.03286	1.14431	1.56448		1.45188	2.81562
1.19551	2.04805	1.5726	1.20502		1.08441	2.08989	0.965169
3.89415	1.97286	4.93511		1.45843	3.51579	2.99329	1.27705
1.83918	1.20619	1.36681		1.8573	5.12575	2.13871	1.15643
4.41368		2.23326	1.1025	4.77255		2.72945	2.02652
1.99533		2.65287	2.17443	3.15057	1.10417		0.792339
1.73529	0.888549	3.15408	1.56259	1.69478	1.5403	3.98648	1.15827
3.78627	2.38855	3.21274	1.58085	2.43222	2.23896	2.49305	0.939909
	3.15787	4.9962	1.31756	2.26977	1.23265	6.08903
1.2658	2.13925	2.99172	1.56965	3.221	1.29418	4.405	1.37485
	3.13063	4.32321	4.6029	1.58614	1.48725	1.45716
1.96073	1.0204	1.62716		2.50787	3.43505	1.75604
2.15986	1.68149	3.37295	2.15656	3.49567	1.34018	1.87451	3.08789
2.88063	1.24422	7.30403	5.63547	4.08514			1.36531
2.08848		5.07502	1.44947	1.23377	1.30465	1.62313	1.39206
	3.13804	6.22168	1.72987	1.29441	1.33296	4.54146	1.17875
0.921534			1.75833	5.54279	1.16745		0.977758
1.21481	2.21845	2.92787	2.81867	1.56048	2.22866	4.42886	2.63323
1.15998	0.937431	3.19955	1.67081		1.50567	6.5789	1.23232
	3.28157	2.99788		2.76204	4.34033	4.40307	0.980245
2.03352	0.906235	2.40831	2.16695	2.22961	1.18809	1.61545	1.24789
1.16142	1.78078	8.77533	1.60013	2.34076	4.15831	1.91947
1.35555	2.00385	6.07517	1.43207	4.25223	1.09114	2.85375	2.41909
1.51391	1.3049	4.30308	1.73154	6.41602	1.63767	1.74524	0.987875
0.870122	1.71112	2.58429	1.08718		1.43232	4.15622	0.760068
2.12845	1.36875	1.56225	1.0406	1.59993	3.80135	3.19279	0.858793
2.5145	3.35536	3.04719	1.45913	4.21916	2.56304	2.23382	1.72781
1.10168	1.0195	2.83132	1.20957	1.52796	1.63153	1.58253	2.82967
0.832898	1.14035	8.11871	2.91377		1.27784	1.88801	2.74394
2.30134		5.73813	1.37317	1.81002	1.14391	2.89672	1.54197
0.98794	4.37187	4.97009	1.08611	1.78574	4.01289	3.06444
1.42355	0.807648	2.7892	2.33027	4.60293		2.09344	0.989312
2.38072	1.30771	4.19403	1.15738	1.59644	1.70815	3.41764
1.70451	1.53597	1.65883	3.24222	7.34394	2.56652	2.13689	1.22453
1.01879	1.90911		1.33311	3.70003	3.3422	7.59797	0.678684
1.66287	1.41026	2.16285	1.45379	1.50276	5.24812
2.5182	1.37786	4.7782	0.966503		1.26182		4.0454
1.2701	2.11272	4.52934	2.22009	2.88869	1.48678	2.05492	2.50811
2.59986	1.13903	3.86719	0.95907	1.64976	2.69322	1.4283	4.81844
1.47213	2.40125	3.15886	5.46868	1.35327	3.87119	5.41935	0.948031
1.24784	1.3657	3.96284	1.76906	5.8398		2.40406	1.96959
1.00447	2.39226	3.24484	1.15619	2.49486	2.59535	1.75854	1.33071
1.11373		7.74526	0.861764	1.7771	2.19596	5.07602	1.96206
1.70271	0.929443	2.73429	4.57449	1.53709		5.92483
1.01989	1.56885	2.40244		2.51886	1.15029	2.75339	3.53799
2.09453	2.53515	2.58376	1.07805	1.31505		1.9032
1.16482	1.00295	7.60838	1.00028	3.47094	1.72318	3.69136	5.25042
1.77525	2.01604	1.43041	1.6138	6.21386	4.30502	2.71402	1.35322
1.89441	1.81111	2.44737	1.05047	3.33487	3.57226	2.31327	1.3687
1.94934	3.57534	9.47973	2.28344		1.59848	2.75078
1.3641	0.813316	1.43741	4.13522	1.56808	1.90337
4.1052	2.06057	2.98659	1.27833		5.02431	2.2533	3.31823
1.4625	0.959668	3.74202	1.46035	2.299	2.74804	4.30925
0.986105	3.57922	2.69201	1.53144	1.50392		1.87654	2.45747
2.19914	1.25941		1.30805	2.89745		1.70089	4.8334
1.30662	2.35235	4.9613	2.34212	5.95757	1.47976	1.84841	3.18252
1.23208	3.88766	1.84366	1.76528	3.33161		2.71215	1.05537
1.08083	2.76606	2.13717	1.70275		2.29625	1.22651	0.960336
2.5408	2.99006	3.12344	0.913632	3.73871	3.47746	4.39704
1.69468	1.33322	1.62045	1.60801	2.8221	1.57221	2.7336	3.4727
1.31788	3.20227	2.70714	1.03827	2.6239	2.74272	2.09474	3.24098
1.33147	1.32647	5.45586	1.14065	3.97664		3.37603
1.6736	1.75932	2.54571	1.34085	2.60126	2.45099	5.54327	1.51077
2.61743	5.10912	1.71036	1.47743	2.43552	2.04727	1.41629	1.1097
1.25343	2.52075		2.7031	2.65352	2.4213	5.94256	3.7397
1.25189	4.10857		0.934751	1.34633		1.79117	2.0103
1.29231	1.0278		1.66303			4.35457	3.93905
3.55702	3.94129	2.03831	4.58661	2.92813	1.4018	1.76889	1.37956
1.23477	3.73425		3.80316	2.9408	3.956	4.77498	1.74805
2.27783		2.16069	0.766318			2.42287
3.84955		5.2492	1.85632	2.93811		1.55425
1.05956	1.39944	9.54913	1.77516	2.38889		6.33945
1.72695	1.65085	7.68114	0.939158		1.60171	2.08604
1.73956	2.16957	5.42865	1.85143	3.32002	5.00882	2.22796	1.02707
1.18957	2.19689	2.14743	1.09439	2.11882		8.34973	2.55552
2.1817	0.940199		2.53643		1.8203	1.90331	1.93876
3.77371	1.19021	1.82694	4.1895	3.67061	2.82281	2.35918	2.58463
1.83598	2.61901	6.06415	3.26645	3.16458	1.0179		2.37554
1.20503	5.04253	3.69787	2.20031	4.08293		3.7897	2.10163
0.741592	1.96959	2.96087	2.30207	2.7759	5.23114	4.91543	1.94892
0.959087	2.03143		3.74215		2.47149	2.46851	1.95848
0.865498	1.15499	2.44996	1.11984	2.87568	1.0568	1.6228	1.47124
0.956598	1.63567	3.46904	3.91042	2.98928	0.705292	4.34597	2.59754
1.86826	3.37774		1.22891	1.9589	3.42239	1.36918	2.94836
1.04471	1.73309	4.80049	0.948588	3.89312	1.88563	2.14908	6.22476
1.03334	1.85828	2.49746		2.14698	2.75075	3.60483	1.47212
1.04468	0.915428	1.52859	2.81906	4.70241		2.2071	4.88734
2.17723	2.43727	7.65619	2.47951		3.69469	1.4997	1.31082
1.13003	1.01995	4.16355	0.995008	2.56263	1.63021	1.42111	1.19023
1.13861	1.96745	4.16974	2.6603	2.23039	1.24476	2.64194	3.39858
1.1111	1.89191	1.60944	2.68684	2.25506	3.16036	1.54368	2.81647
0.859387	2.28372	2.39744	1.43226	3.81158	1.01969	1.8479	4.34857
1.27061		5.92305	1.93491	2.39435	0.862961	1.55578
1.34563	1.55153	3.30427	1.3276	2.29513	2.55873	5.39869	1.30062
1.49938	2.32638	4.74149	3.07838	3.25546	1.23448	2.8773	1.83921
2.20683		3.11195	2.09477	3.2296	2.93795		1.80249
0.962949	1.29078		1.66499	1.51746	0.967871	2.03839	1.04918
1.46777	2.34441		1.52823	6.53636	1.99868	5.1642	1.72156
0.99815		2.27982	1.36137	1.24746		2.48824	2.32527
0.945317	1.01384	2.66704	2.38412	4.06515		5.6811	1.81948
1.25898	4.29381	2.36466	1.46237	2.85221	0.85579	2.33834	2.15876
1.95673	2.46707	2.5682	4.07027	3.54363	1.49842	5.85677	1.3333
1.18794		5.26973	4.41907	4.05117		1.55597	2.07959
0.866338	1.74626	2.87031	2.28011	2.47147	1.76329	5.88189	1.92529
1.15479		6.18737	2.09435	2.00356	1.51268	2.02527	3.54109
1.57729	4.01074	1.61883	1.20598	1.88932	0.839624	3.18096
1.01878	2.83107	4.90496	2.13602	2.0453	0.874001		2.01985
1.00265	1.46937	7.71226	2.69144	3.69376	0.905312	6.17724	1.8555
1.12596	2.03689	1.32404	5.47607	2.96303	3.78731	5.15941	1.09701
0.900115	1.47178	3.87732	1.52816		1.20708	2.60807	2.22593
1.17615	3.63682	8.11376	1.59558	2.39544	0.845787		2.82201
0.996981	2.27684	4.17925	4.05684	1.70532	1.77071	8.25869	4.50797
1.12074	1.43256	3.23549	0.948669	2.38075		3.00165	3.85779
0.880903	1.11745	2.9245	1.09043	2.18145	3.50671	4.43546	6.18503
1.21402	1.16128	6.26472	3.18201	3.65815	1.29619	5.47633	1.46504
0.957076	0.761181		1.78173	3.79257	1.20327	2.86363
1.38083	1.29256		1.6649		0.9753	4.10332	2.41887
1.026	0.816256	7.31786	1.52269	7.18538	4.07236	4.98978	4.13081
1.1594		3.16267		3.76901	1.14337	2.4976	1.30517
1.19553	1.52919	8.94525	1.38699	2.64232		2.55792	1.41635
0.993157	1.49029	4.57287			1.21402	3.91623	2.20756
0.873004	1.56548	5.85591	3.08553	2.98467	3.21497	4.07625	2.81118
1.36393	1.97796	4.10357	3.47907			5.01369	2.72691
1.1382	2.27485		1.81728	1.47777	1.22795	4.04515	1.87908
0.849954	2.15441	3.43198	4.4047	4.15453	1.43321	1.75633	1.05825
0.886756	2.40488	2.97386	1.11951	1.78569	1.21897	2.25736	0.921388
1.11865	2.36195	1.78002	1.90322	6.70949	4.25673	2.81093	2.26148
0.872973	1.06124	3.77769	1.09861	1.84828	0.956157	1.9248	1.15963
1.56062		6.11567	2.21927	4.52966	3.15938	1.76987	4.71783
2.2327	2.38968	2.2129		1.6183	3.3033		2.11266
1.48645	0.987016	1.28323		6.13918	2.6626	1.30743	1.04513
0.850713	4.69436	9.51129	1.26783	7.30676	1.50304	5.2409	2.01443
1.74803	3.03321	2.4224		5.02466	1.54574	2.95486	1.76638
0.93304	1.05226	8.81722	2.39911	6.9421	1.22371	2.2172	0.873623
0.97921	1.11856	3.83309	0.873409	1.75974	1.80551	2.48984	2.08904
1.01934	2.30148	3.29584	1.59583	4.08803	2.26686		1.01008
1.32868	2.01178	2.81553	2.8114	2.17618	2.82832	7.74201	3.31359
1.20627	1.91815		1.75723	4.36225	4.28075	1.71486
1.08774		3.43719	1.28297	5.5429	1.60315	1.52369	5.73671
1.02454		2.15794	1.27074	6.00128	1.60093	4.05659	1.04974
0.874668	5.11529	1.21886		3.33935		1.51983	2.33328
1.10216	0.984935	1.98438	2.49882	2.3488		1.95815
1.12442	2.83261		2.68265				3.79611
0.898149	1.02404	7.85087	1.77876	2.66317	2.22552		1.16756
1.19501	3.75087	1.53178	1.92065		2.19616	3.00013	1.049
1.03561	1.36628	3.53023	0.751916	2.09373	2.16339	6.22098	2.06514
1.01638	2.89254	1.80309	1.35556	3.21598	1.28595		4.4837
1.17199	0.982933	8.42474	2.30209	1.47168		3.4175	2.33227
1.37166	2.65868	3.31188	1.16617	2.36009	3.48036	8.56686	0.953497
1.02987	1.14354	2.23792	1.29542	3.38732		2.2501	3.39491
1.21159	1.62252	2.50853	1.03673	3.51024	1.52283	2.831	3.29672
3.67914		3.19529	2.17792	2.0284	1.52277	1.88556	2.69999
0.927174	1.68653	2.1547	1.10654	4.25646	1.47184		3.65313
2.0815	2.22318	2.16145	0.935773			3.53194
2.11158	3.45437	2.95831	2.39107	1.35392		3.25571	1.29539
0.890525	1.73826	5.27579	0.857903			5.79971	1.92108
1.1037		1.30231	1.90222	5.97439	1.60945	3.17065	1.90405
1.08896	3.4243	1.75202	1.57347	1.7025	1.39086		1.14729
0.970901	5.29013	1.32968	1.95953	2.55203	1.92431	3.63541	3.30961
	1.01342	2.71297	2.40088	2.91758	1.18594	4.8787
	1.49844		1.69342	2.29527	1.6715	6.75287	1.42892
1.79243	2.58381	1.69739	1.01393	1.91742	1.38761	4.95549	3.68119
1.11289	1.97872	1.81842	4.4827	2.73488	1.65821	3.09085	1.34142
1.76491	1.66049	2.81659			1.47128	4.36828	2.09026
1.90394		3.77394	4.13713	1.74104	1.8713	3.56054	5.82893
1.206	0.856517	1.65522	1.40261	2.75973	3.47893		1.75205
2.11399	0.855016	4.03002	0.909153	4.28333	1.43978	1.86527	1.79875
1.26483		2.0738	2.01085	2.9742	1.8516
1.12641		3.13043	3.14742	2.32112	2.22292	1.45683	3.69836
0.959595	2.08557	4.98192	2.01328	2.63527	1.75954	3.71024	3.28869
1.02133	3.1846	4.63208	3.41794	3.8373	2.80873	1.98038
1.30753	1.55332	1.90665	2.0654	3.18657	1.51012	4.50063	1.97491
1.70232	4.02605	1.24743	1.91277	1.50002	3.61335	5.92623	1.16041
1.57984	3.76846	2.03084	5.40867	4.94018	2.62912	1.28677	1.82562
1.9105			0.968735	1.63064	5.24766	2.31931	1.27851
1.63475	3.55147			1.73008	1.78521	5.78713	1.07349
2.25438	1.98994	3.24471		2.8644	1.55011	1.97665
2.794	1.99469	4.53103		1.95573	1.52786	3.85459	2.35728
1.51307	3.94683	2.83615	0.934968	1.90675	1.33518	2.91446	1.14338
1.38809	1.2787	2.35538	1.1939	2.1898		7.95197
1.66309		4.128	4.25979	4.3631	1.17855	5.92591	1.68498
1.87505		5.37519	1.30339	2.97274	4.48528	8.26491	2.17097
1.10574	3.20484	5.16639	1.54294	1.34578	1.56214	1.7384	1.38466
1.24683	3.56856	3.19205	2.64132	1.37838	1.21011	2.88429	1.86239
1.68669	1.068	3.67451	0.908756	2.01287	1.713	8.88001	1.80019
1.26248		3.14206		3.17877		2.81609	3.26591
1.11524	4.95586	5.13593	2.47656		1.15812	2.60999	1.22558
1.0469		2.15993	1.7271		1.76661	6.44067	1.14578
1.55237	3.11096	5.52957	1.20712		1.31432	1.57879	1.31176
1.29611	1.3464	3.55618	1.01187		1.35598		1.01309
2.97566	3.3922	2.10532	1.31763	2.72783	1.02223		1.8298
		7.16313	1.02884	2.04126	1.59537	2.31962	5.38796
1.53777	1.25264	3.69957	1.7018		2.6185		3.73697
1.75196	5.1492	2.07416	2.33844		4.30844	1.63061	4.9143
1.36348	0.847568	4.5619	3.14981	2.01557	1.57967	3.91674	5.52691
1.77329	1.58002	3.35634	0.993415	1.98328	2.74485	1.64362	1.70187
3.04866		2.12744	1.06796	4.12754	3.77432	6.10323	2.33084
2.22773	1.37783		2.59302	1.99577	1.28489	1.65624	3.19118
3.35488		2.15864	1.75642	1.46936	2.16917	3.08521	3.27855
2.9027		4.15379	1.37907	3.01796	2.65794	2.08986	2.26293
1.16066	0.998606	1.61605	1.3379	3.37129	1.39357	2.92129	2.2008
1.60683	2.73224		1.04202		3.68303	3.49926	1.66467
2.35664	3.53159		3.12385	2.67643		5.39875	0.755488
1.48878	2.28694	3.45648	1.66028	3.01394	1.45906	1.51765	3.55674
1.43089	1.94665	3.44548	1.01858	1.72899	1.43828	4.21168	1.60786
1.35036	1.11818	2.40919	3.26672	1.63963	4.10663	2.07359	2.85348
1.19814	1.32421	1.29342	0.974117	1.6664	2.35422	5.59458	2.26616
1.66048	1.36561	2.54731	1.75959	2.46495	1.49777	2.78793
1.67804	0.767964	1.84976	2.16666	2.42702	1.28668	5.10745	1.09439
1.32621	4.04872	1.32657	2.51806	1.42116	1.38313	2.87464
1.91496	1.33613	3.42959	4.60738	1.96817	3.90633	3.13494	1.94656
1.9251	0.955761	6.58521	1.48713	3.23798	1.002	1.76661	1.19193
0.876327	2.81994		1.621	3.31016		5.39278	3.32878
1.77796	1.34701	3.40481	5.52019	3.05937	3.15366	4.08144	3.89111
2.11534	3.73817	3.15939	2.90455		1.05595	2.48276	2.69842
1.58546	2.28215	2.6468	1.26601	4.71971	3.03625	7.76381	4.53173
3.81778	3.37841	3.08267	1.73728	1.33215	4.17962		3.64539
1.33822	1.01533	1.91781	2.38505	2.35599	1.10706	3.65932	1.45994
1.95214	1.47467	1.90651	1.55612		1.17776	1.427	4.73306
2.36341	1.02977	1.65826	0.999934	4.95246	1.63577	2.60665	3.17822
1.32585	1.23106	3.79885	1.76983		1.24972	2.43904	1.653
	1.00903	1.82027	2.19744	1.63465	1.3363	4.22127	5.48759
1.13285	3.56665	3.1007	1.11126	3.17516	1.33406	2.18712
1.23134		2.01415	1.17352			2.62067	2.93821
2.387	0.874713	6.52223	2.89913	2.34447		3.07062	1.67667
0.965872	3.82898	1.88018	2.00047	1.89114	2.00924		5.46913
0.749048		2.43683		2.30349	1.54863	3.19145	3.90902
2.2568		1.52039		2.71058	1.07279		2.98156
2.52582	1.74906	3.23043	2.69675		4.99057	4.43625	2.16763
2.83142	4.24121		3.50138		1.47956	3.65487	1.76892
1.44911		3.30793	2.10716	7.4499	3.48166		3.10147
1.3387		4.61984	2.27207		1.45881	1.58355	5.20781
1.26855	1.61476	3.6133	2.81352		3.18696	3.58973
0.917916	1.88474	3.82762	1.25951		1.32069	3.0511	3.0829
3.29714		2.58055	1.03588		1.81807	6.48178	1.20899
1.80501	1.25755	5.19129	1.23734	2.55506	1.29399	1.96999
2.56692	0.892746	2.75451	2.71469	1.92568	1.42902	2.81514	1.32389
1.67116	3.01586	2.32053	0.93973	3.04347	3.79171	8.85145
4.30471		7.56663	1.40178	3.12033	1.88979	5.96548	3.88728
2.32647	2.70716	2.03539	1.71083	4.29849	1.96164	1.90017	1.92238
1.21252		2.40046	4.5003	7.27473	1.3784	7.5122	4.00258
1.37554	1.56481	2.04251		1.3318	4.86442	2.4144	4.16057
1.50107	1.0006	3.91146				3.24901	3.68101
1.13871	2.4038	3.64386	1.87197	4.39044	2.4721	1.71051	1.20829
2.00538	1.6563	7.22699	3.12379		1.38179		0.726027
1.59298	3.39765	3.87905	2.84746	3.79827	1.28063	3.3291	1.52019
1.26088		2.10359	2.46702	3.11374	3.38955	1.18969	1.39223
	1.23016	1.6517		6.62103	3.87754	1.55789	3.67205
1.31495	1.63593	1.64021	1.02616	4.50537	1.88054	1.81596	4.45091
0.94044	1.83487	3.78587	1.53064	3.50157		2.07561	3.44133
1.6249	1.00252	4.77443		3.80274		3.85569	5.34536
1.72665	4.1506	5.21077	1.51099	3.65537	1.45636	3.01862
1.04639		4.35048		3.09808		4.64992	1.20651
		2.11995	5.5323	2.31049	2.79438	4.95488	4.23259
	5.26805	1.94036		4.66604	0.973554	4.33597	1.12162
1.62693	3.65098	1.76822	4.37774	1.75989	1.32378	1.61483	3.36918
1.1854	3.69875	2.01419	4.2842	3.24689	1.02253	4.42456
2.23029	2.09409	5.93879	4.53906	2.0283	1.46818	4.81513	1.49465
2.26313	1.52107	6.59407		2.35202	3.00344		4.88842
4.25328	2.36968	7.11757		2.09658		4.91016	1.83458
1.55998		5.61227		3.17069	4.51891	1.5611	1.35645
2.84077	5.29239	4.07601	2.05049	3.49251	1.41186	2.94713	0.902358
2.24759	1.18551	2.9971	2.38893	3.92099	2.13892	8.25721	4.51959
3.39247		7.89879	2.66372	3.57788	2.10501		3.27033
3.47364	2.34733	3.17875	2.74306	2.62969	1.11799	4.08608	2.64203
	2.07459	4.6124	4.16363	6.72716		3.54633	1.32957
1.41086	1.41054	3.05171	4.15817	2.08786	2.36783	1.64721	2.44078
1.11753			2.45652	3.02645	1.14006	4.14324	2.44524
		4.84737	1.5526	1.47313	2.8144	1.62829	1.41026
		3.42441	1.54707	1.55779		2.19342	2.95838
1.72547	1.95607	2.54199	3.72398	3.94846	2.45253	1.6209
2.02868	1.20946	7.60944	2.09434	2.25471	2.22412	3.44191	1.27361
2.17428		3.18776	1.67017	2.31651		6.06757	1.59725
	3.43609	4.06747	1.98209	1.82233	2.30072	8.49375
1.50621	1.62838	1.48305	1.60844	1.72111	1.38694	3.14998	1.30908
1.23772	2.21918	8.10803	4.70657	2.49166	1.35219	1.53506	1.35745
2.35697	1.30408	7.95203		3.22912		2.12169	4.72512
1.37871	1.46	4.0091	1.15551		5.13118	4.02707	2.93433
2.19267	1.8713		3.05865		2.72556	8.06142	1.02176
2.81477	1.64988	2.35683	2.61937	4.11823	1.24387	1.74423	2.87224
3.1562	1.65149	6.23063	1.23931	1.77324		3.69461	4.54959
1.73045	1.786	2.30269		1.66015	1.27743	4.38869	3.37594
1.31294	1.20985	2.12804	3.92193	3.78879		2.62468
	1.40294	4.19793	1.3933	1.61953	5.28131	1.84665
1.59663		2.87784	1.82211	2.80731		5.43136	2.57537
1.31683	1.16463	1.91699	2.10156	3.13511	1.41246	1.58558	1.96669
2.344	1.64549	7.7842	1.90644	4.26519		3.47545	3.46401
1.35681	1.35623	4.78536	1.25874	2.56256	2.67503	1.9744	2.17364
1.39534	1.01621	5.01838	1.62281	6.60865	1.49532	4.51412	1.97321
3.30201	2.14369	3.83901	1.03286	2.78485	1.49698	2.6526	1.43628
1.1775	1.65763	1.15791	2.23664	4.18966	1.96997	1.73614	2.33686
1.47613	4.23867	3.24186		2.03474	1.27738	2.50874	2.81136
4.23464		3.21742	1.83206	2.27472	1.6569	1.57679	2.26086
	1.45863	1.88578	1.59541	2.4277	1.69175	1.6826	1.22111
1.00365	1.63362	3.69757		4.41744	1.58078	1.94849	1.32744
4.18696	1.76159	6.77859	0.831725	2.74317	5.35121	7.61767	1.44903
0.846344		6.72083	1.90769	3.34106	1.65302	7.24641	1.83157
3.68735	2.0436	3.61559		2.43364	2.71705	4.57818	1.95729
1.3305	2.74556	2.68197	1.31534	5.04948	1.49654	2.16666	1.19169
1.4279	3.61382	2.08715			1.7299	3.14189	2.23573
1.40037	1.62004	2.84332	4.52749	2.11111	1.85752	2.84074	3.14352
0.988506	1.21817	2.07207	3.77192	2.24281	3.95663	1.75072	1.26251
1.07489	1.43398		0.920515	4.06978	2.9737	1.42644	2.16745
2.46666	1.73567	1.93386	2.24539	3.30527	3.08074	3.05183	1.51924
1.78085	2.48902	1.48885		3.49209	1.54198
3.69119		1.81165		2.15994	1.61894	3.07965	1.28641
1.0126	1.15446	2.45681		1.59088	2.17631	8.8494
1.37358	2.89954	5.1488	3.1062		2.56905	6.21028	1.54386
4.50537	1.68966	6.87312		3.00725	3.81897	2.56787	4.19484
	2.09411	2.31645	2.0809	3.35804	1.90237	2.98971	2.43695
3.68598	2.23323	5.51893	4.87671	1.77002	2.10583	2.33936	1.86487
4.39542	1.07412	8.96948	2.36222	1.35789	2.6072		1.10482
2.90389	2.67198		2.5817	5.16892	1.47509	2.14173	2.7544
3.22177	1.53672	3.08678		2.34236	1.44214	1.45539
1.74261	1.13104	3.53922	0.916545	1.8115	3.19065	2.41351	3.33416
	2.9407	3.23382		4.38695	2.67662	2.38313	1.27728
0.777075	1.01521	5.09107		2.03773	3.10737		1.34518
1.16993	1.3478	4.99162	5.62244	2.76127	1.6717	2.23808	1.98761
	1.84557	3.01304	3.89505	3.80735	0.970951	2.0224	1.2609
		2.81816	4.58337	4.01328	1.41607	6.0368	1.57502
0.927217	1.32346	2.32658	0.834196	2.86803	4.62746	1.32414	2.24487
1.04825			1.21393	1.7809	3.47979		1.47273
	3.85139	3.99745		3.97443	2.43995	3.16665	3.37953
	1.37491	4.35883	1.38603	1.2792	2.92185	7.2829	4.71051
3.47993	4.67671	2.3413	1.19459	2.47634	3.37376	4.82855	1.80691
	2.55771	6.3286		4.81995	1.60107	4.79153
2.14678	1.99175	2.70616	1.3348	1.21436	4.10454	1.55673	6.25952
0.945504	1.59343		1.22067	1.34168	2.27544	5.56446	2.79519
2.37012	1.55108	1.75185	3.68201	3.00975	1.54702		2.32313
		2.3045	3.08633	2.45119	3.90684	2.52265	1.49098
0.99432	1.15571	2.14721	2.96434	3.83212	3.19357	2.36279
1.90073	2.26035	3.54437		2.62308	1.40761	2.93702	1.35453
3.8336	1.08314	8.49077		6.3113	2.28696	1.43885	3.30166
1.22161	1.10452		1.11994	2.17493	1.21531	5.88834	1.43696
	1.90586	3.42863	1.94847	5.00801	1.93963	6.4237	3.73812
1.81801	3.9785	6.48624	1.22411		2.35848	2.70216	5.42008
2.10333	1.84995	2.23153		4.01209	1.46251		1.11841
3.31358		7.37822	1.26143	2.54564	2.04691	4.64541
	1.90302	2.94625	1.23061	3.98095	3.4141	2.7357	2.2379
1.53399	1.40622	6.22351	2.11268	2.54569			4.27303
2.30776	1.42554	2.03228		5.91467	2.11292	2.75918	1.25636
	1.76917	8.82161	2.81795	4.13209	1.65314	4.41933	1.47912
3.62973		3.77306	0.860758	1.75294	4.1406	2.42993	1.16995
1.22188	2.50924	1.92418	3.08196	2.86031	4.94269	4.76851	4.28556
1.05479	1.73156		2.03632	4.64546		3.59523
0.949159	2.47591	2.78113		5.41759	3.05582	8.05347	1.88243
1.74315	1.61614	2.20905	2.03176	4.32403	4.11947	1.83004	5.83518
	2.473	1.53305		4.39981	2.18879		2.74832
1.30893	3.86414	3.04053	5.16819	1.82771		6.68911	1.95997
0.859905	1.87811	5.02167		1.73401		7.28598	1.3355
1.15247	2.63791			2.73758	1.56556	2.69573
1.42958		6.77859		2.75552	1.98815	5.29916	2.70283
1.55802		7.37986		1.62768	2.65009	3.02763
	1.06785	3.20418		2.07018	0.957503	2.09538	1.16829
	1.83581	4.86001	1.17315	6.81439	4.98497	3.39303	1.02326
2.05143	2.23664		1.31819	3.37261		3.56293
2.26855	2.02411	1.36581	4.90874	1.53367	1.40632		1.41413
3.29896		1.17505	1.64034	3.76545	1.41883	4.23042	2.72614
	3.24716	6.04491	1.02611	2.2976	3.44853	5.4862	2.64631
1.50394				2.45378	2.70466	6.80323	1.35077
	1.11582	2.8412	5.14218	2.41628	1.6793	3.9168	1.50135
1.9837	1.90499	5.62846		1.76472		4.95645	1.14502
4.27898	1.83897	5.2051	2.12273	1.73996	1.75425	2.67759	2.71169
1.29294	1.43383	4.12193		2.78902	2.08542	3.05984
	2.37355	6.16672	3.6168	3.65075		2.4332	1.77501
		2.08749	3.40943	2.78526	3.72492	1.91941
3.20294		3.66691	1.19766	2.07387	2.19829	2.58939
3.92124	4.15598	7.40121	1.55922	2.79483	1.22031	4.41755	5.05242
1.68112		4.93983	3.83953	6.71165	1.67712	5.63465	1.37165
1.04227	2.42875	3.79417	1.41331	2.80647	3.09486	2.55005	0.78818
				2.53767	4.55424	6.65993
2.19181	1.30768	3.91627	1.76853	2.13647		1.64417	1.78674
1.6518	2.36496	6.42337		2.15177		2.25265	1.53163
1.9989	3.63787	3.71815	2.00253	1.80612	2.16675	3.41175	6.3176
0.866755	2.74316	3.84698	1.30357	3.73733	1.59609	2.42784
0.86206	3.77982	3.56191	1.82558	4.98688	3.38461	3.38518	4.60822
1.32229	1.34103	3.58861		2.56214	2.48812	3.63925	3.20537
	1.81399	6.22333	2.39344	1.15093	1.18407	2.86694	2.06785
1.7845	3.43396	6.10088		4.44068		1.59801	2.34949
1.30135	1.40699	6.45526	1.49913	2.89841		2.40891
0.854674	1.56895	2.46259	2.50116	6.36253	3.67545	1.49965
1.19534	1.64275	3.1747	2.33047	5.06362		5.78617	0.79409
	1.57859	7.7911	4.42569	1.43955	1.17305	3.1502	1.84179
2.17508	1.59206	3.31758	2.97284		1.41704	2.71287	3.44537
0.934334	2.95027	4.79905	3.26415		1.71144	2.41708	3.46692
	1.03378	1.77423	0.83669	2.25231	2.95664	3.65251	4.35645
	3.9896	7.47559	0.898544		0.888487	4.65396
1.37232	2.30703	6.36173	1.50028	2.20921	3.39022	7.65645	1.57093
1.02199	4.27345	3.10008		2.91415	3.24805	3.08636	2.17063
	3.21519	1.84102	2.02253	2.58932	1.04485	2.16194	5.90031
1.69425		6.54662	4.06056	3.77292	3.25672	6.54851	1.3328
	2.96145	3.79101	1.61042	2.15766
1.02639			2.12204	4.83904	1.37292	2.32612	2.18844
2.09271	1.07389	5.42273	1.03151	2.3237	4.47153	1.5218	1.15501
	5.21737	6.18	3.33429	2.42497	1.63163
4.50705	1.93813	1.552	3.08974	7.62491	2.60683		0.955005
		3.48406	1.06417	2.01613	3.42235	4.35343
1.04208		7.86349		1.3886	3.02696	1.4043	2.085
1.83266	1.1724	5.1311		1.93712	3.33502	1.88116	2.67886
1.28774	1.13717	2.30526	5.56507	7.1556	1.66747	1.50721	0.879817
2.21498	1.235	7.86127	1.41087	1.50949	3.15237	2.56345	1.03746
3.22196	3.75771	5.15264	1.33688	2.87416	2.70151	5.26446	1.53424
	1.8762	4.08215	5.09135		2.81593	4.48171	1.9093
0.787288	2.12144	5.005	1.64652	1.40456	1.19826	1.39569	3.17911
1.10641	4.16176	9.10402	1.37709	3.06309	5.40252		1.22
0.910712	2.19903	3.43536	1.94523	4.14529	1.08283	4.77611	5.50331
2.12394	2.85546	4.21674	3.48542	3.87162	1.53571	1.86614	1.40291
1.45957	1.37465	7.66359		1.70806	1.31592	7.13351	0.931362
2.53172	2.227	2.0807		4.42678	1.71215	2.18295	2.03551
2.47458		2.20954		3.34494	2.17596	1.82566	1.27204
2.19723	3.30877	7.50268	0.958128	1.88941	3.06746	6.50665	2.22846
1.53886	2.20225		3.45696	2.25194	2.82509	2.35519	4.1045
1.43521	2.26093	4.5225	1.5853	3.54626	4.02418	3.11993	1.184
2.72452	1.22312	7.52424	1.73963	1.63064		5.4175
1.04107	2.7374	3.03866	2.09111	6.6075	1.78418	5.7556	1.57824
1.36523	1.60401		1.405	3.55745	5.08646	2.176	1.5069
4.04582	2.15237	3.8183	1.21552	3.51695			1.49589
1.61412	2.35424	1.61405	3.80481	4.8516	1.67519	1.55364	3.17989
	2.29889	4.27618		2.29206		2.31235	1.52997
2.99265		4.64878	1.25816	1.82556	5.31798	2.43474	0.970063
0.94805	1.89381	2.34031	4.37466	1.37801	1.01098	1.60556	1.7669
4.12493	1.8757	2.39424	0.93863	1.60233	3.2886	2.09628	2.05729
1.11874	3.06894	6.4374		1.59107	1.24635	2.34354	1.50681
2.66551	2.61634	2.66694	2.70847	2.13937	1.38272	2.64915
1.85618		2.38271	2.90964	4.40579	1.67683	5.46256	1.97268
1.15069	4.96178	2.49589	2.77948	2.56713	3.10625	3.06163	1.48063
0.719664	2.33684	5.87848	1.79044	2.60613	2.95907	4.7084	1.38165
1.26811	2.34758	5.17729	4.89575	4.54655	3.05274	8.80211	1.50924
1.12797		4.38967	1.40998	2.94958	2.70072	1.77061
0.968288	3.0989	3.61037	1.10879	4.56988	1.61103		1.57453
1.27177	2.30185	2.60294	1.41516	3.56658	1.60709	5.78502	1.18876
0.89959	3.29369			5.88179	1.19803	1.69433	1.56367
1.47025	3.82891	2.92109	0.997548			1.86502	0.919566
1.01359	3.97881	4.00685	0.718267	3.44513	1.57981	5.08758	0.852006
1.60964	1.21937	3.46906	2.97616	1.62682	1.4396	4.53257	2.73067
1.70925	1.22868	2.02014	2.66046	3.27888		3.68485	5.56304
1.45039	2.5827		3.903	2.42146	1.62542	2.45296	1.61603
2.25342	3.21542	4.02669	0.883378		1.74056	2.17969	1.66228
[truncated: 3,823 more rows]

## Sheet: Figure 4D
Veh	Veh+I	HF	HF+I	3610	3610+I	357	0357+I
0.941232	0.0998861	0.446494	0.062362	0.776403	0.0815118	0.0854773	0.124806
0.774609	0.582714	0.365591	0.540328	0.447785	0.852448	0.376368	0.458879
0.520667	0.765292	0.474176	0.399934	0.374329	0.560562	0.434953	0.410806
0.528098	0.214863	0.33792	0.641774	0.459976	0.530375	0.44402	0.60157
0.545155	0.402031	0.398981	0.471766	0.425936	0.471928	0.278485	0.334749
0.762515	0.824249	0.533833	0.561828	0.426303	0.483423	0.266432	0.583706
0.892067	0.490195	0.285057	0.730857	0.528005	0.612517	0.354796	0.560552
0.75042	0.7509	0.512145	0.599951	0.640459	0.353961	0.282872	0.404365
0.71447	0.612873	0.494032	0.669345	0.412587	0.853905	0.41671	0.558137
0.709649	0.798492	0.340624	0.749044	0.521661	0.524278	0.3451	0.576948
0.481146	0.598306	0.514161	0.529104	0.395262	0.602496	0.440942	0.719364
0.851691	0.589842	0.640387	0.469833	0.598393	0.777529	0.441436	0.4202
0.893455	0.346973	0.441465	0.475341	0.661	0.638285	0.566355	0.507176
0.868185	0.831922	0.388105	0.521963	0.365988	0.91605	0.505542	0.350847
0.641134	0.618635	0.429518	0.406595	0.525918	0.432244	0.320007	0.625163
0.697607	0.492146	0.502153	0.253303	0.617067	0.679053	0.314115	0.522246
0.603487	0.642276	0.355305	0.638484	0.533085	0.702958	0.704769	0.342417
0.684132	0.721269	0.569825	0.608409	0.34974	0.719773	0.252087	0.550499
0.756307	0.462796	0.387597	0.57218	0.263703	0.728589	0.474997	0.715347
0.758229	0.512753	0.398017	0.481479	0.592589	0.716222	0.282495	0.377625
0.745185	0.655279	0.753051	0.390034	0.406068	0.863966	0.572798	0.41271
0.58539	0.60872	0.649985	0.601449	0.367461	0.250402	0.490785	0.520574
0.94003	0.414046	0.549333	0.506717	0.617178	0.687006	0.570431	0.658405
0.765179	0.647825	0.318199	0.57893	0.46922	0.496383	0.496103	0.710997
0.605204	0.449892	0.445313	0.294206	0.374526	0.70285	0.582211	0.445542
0.766735	0.69173	0.496837	0.399033	0.587676	0.249679	0.570048	0.62169
0.521972	0.558297	0.336341	0.293606	0.382247	0.833652	0.505344	0.42144
0.525101	0.493327	0.456562	0.681286	0.309638	0.433801	0.613395	0.497884
0.893124	0.291677	0.422472	0.489103	0.651863	0.378345	0.603943	0.673645
0.572234	0.726463	0.458203	0.448754	0.446991	0.47751	0.480833	0.462769
0.831042	0.441387	0.510243	0.336944	0.444886	0.343197	0.53834	0.648898
0.607906	0.30219	0.368307	0.59477	0.536615	0.706679	0.748927	0.721872
0.689807	0.562677	0.396594	0.583183	0.435636	0.699972	0.455008	0.275299
0.906337	0.556645	0.297235	0.600534	0.437124	0.481168	0.664219	0.434138
0.946511	0.860264	0.418363	0.713529	0.491562	0.352701	0.325467	0.690206
0.892772	0.565093	0.298218	0.541774	0.607439	0.536266	0.544149	0.489256
0.897496	0.690824	0.607259	0.322314	0.671607	0.539984	0.561688	0.740035
0.909108	0.610673	0.465897	0.464341	0.757925	0.451684	0.556145	0.504152
0.920813	0.779442	0.626907	0.582486	0.481847	0.611765	0.519008	0.657723
0.928389	0.541977	0.455172	0.228928	0.37329	0.678997	0.352829	0.697571
0.735026	0.641631	0.718515	0.447942	0.668898	0.441174	0.429087	0.580418
0.890438	0.704276	0.719583	0.326863	0.49265	0.41108	0.608737	0.628156
0.836364	0.397342	0.444478	0.798669	0.58059	0.578723	0.539501	0.444573
0.7293	0.520613	0.390799	0.420593	0.463669	0.40972	0.575601	0.545934
0.751033	0.737475	0.384423	0.184405	0.542545	0.728131	0.614081	0.217147
0.73162	0.859217	0.38408	0.346287	0.439228	0.453508	0.377807	0.706054
0.844894	0.631559	0.346268	0.436424	0.550898	0.509768	0.747299	0.331279
0.90368	0.546856	0.4356	0.536512	0.445437	0.593175	0.312095	0.597771
0.763464	0.740979	0.555372	0.388903	0.558815	0.422966	0.60752	0.563673
0.926909	0.338088	0.492337	0.33829	0.526431	0.635507	0.278324	0.651114
0.299153	0.500991	0.477838	0.512486	0.536752	0.174917	0.313599	0.30987
0.540816	0.654913	0.521785	0.729064	0.445354	0.747169	0.487508	0.743947
0.792497	0.652245	0.59828	0.654933	0.315333	0.60668	0.489654	0.126768
0.550853	0.502863	0.119157	0.395604	0.580328	0.37323	0.549887	0.684232
0.664128	0.32404	0.525335	0.251539	0.627061	0.580255	0.493012	0.445117
0.7575	0.755763	0.413036	0.290747	0.178146	0.40489	0.412249	0.714269
0.829037	0.788365	0.732051	0.418791	0.541364	0.456023	0.402122	0.687199
0.867501	0.363254	0.451656	0.378141	0.575927	0.574328	0.657046	0.743784
0.904319	0.341008	0.673415	0.707689	0.538206	0.346267	0.355897	0.767656
0.578456	0.735266	0.559382	0.217497	0.279591	0.755449	0.423324	0.657791
0.796345	0.579718	0.592923	0.547437	0.510928	0.716192	0.448364	0.375808
0.487552	0.544965	0.0964974	0.436599	0.58213	0.495081	0.502164	0.701557
0.777799	0.48466	0.586342	0.583597	0.510579	0.383489	0.583337	0.541382
0.909342	0.604026	0.742012	0.238871	0.41655	0.561799	0.45403	0.686392
0.694924	0.516033	0.522626	0.325851	0.562049	0.745217	0.365954	0.600629
0.887996	0.78757	0.493344	0.716439	0.507831	0.381878	0.391216	0.364296
0.466932	0.670258	0.531132	0.243487	0.479968	0.452393	0.492795	0.529852
0.932954	0.361674	0.432177	0.679977	0.571868	0.445301	0.54956	0.63944
0.629515	0.413853	0.0895771	0.642644	0.576826	0.778572	0.363666	0.643012
0.584551	0.651857	0.485194	0.819935	0.451357	0.532137	0.514432	0.468283
0.844733	0.720079	0.556345	0.536393	0.311363	0.506682	0.333179	0.36142
0.870975	0.639869	0.380051	0.527611	0.573723	0.597917	0.914759	0.690812
0.931135	0.476471	0.394304	0.46951	0.626203	0.841699	0.361249	0.655777
0.898444	0.562588	0.522147	0.548291	0.437377	0.599001	0.577935	0.572111
0.880379	0.495684		0.490425	0.197351	0.399329	0.769311	0.530507
0.482777	0.841818	0.0845642	0.710969	0.623345	0.90032	0.328676	0.623552
0.725273	0.326492	0.411515	0.329729	0.579253	0.67401	0.417772	0.708881
0.607317	0.736667	0.715938	0.775318	0.518216	0.607497	0.630861	0.508879
0.704594	0.227729	0.502223	0.748523	0.371957	0.680922	0.2592	0.683072
0.907037	0.712767	0.495338	0.680274	0.693859	0.398439	0.266062	0.317777
0.605806	0.451249	0.578249	0.533028	0.442283	0.899313	0.315517	0.221047
0.757566	0.453731	0.464817	0.55919	0.40933	0.319529	0.629527	0.478677
0.707435	0.552345	0.607782	0.251325	0.383403	0.774592	0.575672	0.541089
0.608355	0.41913	0.417592	0.652187	0.514867	0.90694	0.36946	0.65656
0.809502	0.370054	0.378395	0.430068	0.597087	0.660155	0.618137	0.599496
0.811131	0.682029	0.495123	0.373673	0.356083	0.374237	0.598114	0.63305
0.606562	0.488864	0.775496	0.578851	0.36353	0.689391	0.556979	0.555137
0.598536	0.388963	0.583735	0.472668	0.569374	0.539526	0.606544	0.449993
0.790835	0.612543	0.452731	0.783386	0.504638	0.780359	0.432854	0.63864
0.741234	0.384823	0.516743	0.751715	0.624176	0.405777	0.245498	0.560995
0.772464	0.456044	0.784812	0.821171	0.539495	0.878415	0.441588	0.723157
0.701573	0.434411	0.604611	0.423408	0.560708	0.712161	0.491787	0.358222
0.879228	0.521273	0.525658	0.742516	0.505934	0.528714	0.524107	0.2499
0.848335	0.449063	0.709124	0.509894	0.626137	0.325259	0.452947	0.778932
0.886048	0.501441	0.817967	0.73416	0.504552	0.883044	0.560001	0.49868
0.842507	0.454246	0.318781	0.805617	0.389303	0.607586	0.416602	0.509412
0.592336	0.663074	0.446432	0.477153	0.490675	0.870497	0.169021	0.642732
0.556043	0.794553	0.425006	0.195386	0.373746	0.361921	0.496556	0.40806
0.934222	0.366967	0.614123	0.578385	0.629035	0.454058	0.423903	0.664765
0.890603	0.621376	0.516006	0.875489	0.70455	0.388479	0.34871	0.786535
0.657164	0.510551	0.47994	0.641191	0.524156	0.661392	0.429014	0.548829
0.683674	0.601834	0.549386	0.487483	0.607319	0.577372	0.379313	0.641809
0.923838	0.751332	0.595728	0.528948	0.309664	0.810804	0.229273	0.43038
0.928438	0.790276	0.587916	0.901756	0.462231	0.606539	0.432862	0.394712
0.844896	0.482607	0.398531	0.345789	0.637416	0.840486	0.279895	0.760949
0.936867	0.511569	0.64785	0.739844	0.478156	0.305089	0.426769	0.137762
0.549281	0.615457	0.423418	0.283515	0.563909	0.537267		0.694638
0.822748	0.721346	0.360428	0.604553	0.596541	0.450143	0.0925455	0.560159
0.934337	0.271129	0.634467	0.602486	0.57671	0.684933	0.383599	0.303079
0.825424	0.737089	0.63649	0.625641	0.737878	0.332757	0.413944	0.729311
0.930182	0.634626	0.371349	0.727417	0.429077	0.753948	0.575224	0.294209
0.467079	0.736247	0.752744	0.348331	0.545457	0.472235	0.249579	0.399231
0.898045	0.466205	0.398986	0.800998	0.529131	0.627214	0.557896	0.686066
0.921002	0.860928	0.61153	0.392326	0.604877	0.759576	0.318148	0.637187
0.755489	0.897758	0.353767	0.726751	0.472166	0.47327	0.497496	0.795665
0.391974	0.800151	0.385532	0.793414	0.531792	0.577103	0.581561	0.386031
0.777166	0.511678	0.809969	0.540976	0.364409	0.376714	0.578294	0.692693
0.746215	0.833507	0.505806	0.71481	0.618	0.527234	0.414842	0.702931
0.642045	0.465454	0.570192	0.738006	0.427331	0.686234	0.504708	0.412153
0.678553	0.331032	0.437395	0.494878	0.525218	0.688887	0.406957	0.424102
0.30332	0.842208	0.530641	0.517018	0.703334	0.375853	0.511122	0.568898
0.919299	0.598322	0.417345	0.777381	0.462075	0.430871	0.559553	0.630938
0.576856	0.352304	0.695137	0.734739	0.604544	0.851638	0.558974	0.605953
0.901654	0.835904		0.793651	0.563244	0.619729	0.403668	0.739414
0.91331	0.362863	0.660525	0.829762	0.435621	0.485013	0.455925	0.607436
0.793794	0.414466	0.670932	0.472953	0.470878	0.763983	0.446312	0.706282
0.571434	0.409104	0.786193	0.724984	0.582609	0.667822	0.55767	0.709819
0.574136	0.737383	0.499933	0.739071	0.748231	0.582282	0.624248	0.603261
0.910327	0.574074	0.547546	0.834949	0.255763	0.626993	0.502684	0.696307
0.919609	0.810696	0.798182	0.444335	0.282174	0.572296	0.470607	0.326827
0.753676	0.667372	0.498188	0.844669	0.537238	0.173965	0.208939	0.616573
0.910261	0.336213	0.66766	0.619686	0.636467	0.469468	0.255527	0.763367
0.950522	0.571926	0.559923	0.607506	0.575852	0.508714	0.513936	0.555246
0.792407	0.784228	0.577027	0.530005	0.444515	0.53405	0.583011	0.561546
0.142891	0.92047	0.597919	0.423501	0.494181	0.793743	0.611077	0.533439
0.451805	0.468509	0.571604	0.553591	0.491113	0.808627	0.472227	0.7644
0.839214	0.724196	0.418395	0.497094	0.588197	0.720095	0.29937	0.799195
0.883991	0.785486	0.663753	0.300513	0.474556	0.390477	0.524014	0.130396
0.886039	0.775135	0.708316	0.388329	0.258146	0.687109	0.453174	0.508448
0.91188	0.683047	0.554827	0.449441	0.626679	0.792038	0.287578	0.68757
0.94254	0.398741	0.725927	0.256503	0.768408	0.610621	0.454595	0.722205
0.94195	0.503983	0.683699	0.644969	0.334123	0.733698	0.461222	0.666477
0.758637	0.628715	0.513242	0.428312	0.60999	0.334072	0.605224	0.60354
0.613393	0.485627	0.81456	0.549103	0.452086	0.593655	0.454479	0.54032
0.688197	0.26566	0.625258	0.379721	0.55358	0.919485	0.542738	0.561702
0.525934	0.587659	0.333251	0.626403	0.44579	0.444489	0.3111	0.493148
0.741082	0.695396	0.519029	0.471128	0.586779	0.400885	0.555831	0.431446
0.790159	0.569473	0.505975	0.337128	0.530923	0.729515	0.412367	0.534558
0.814015	0.745749	0.579756	0.348986	0.278578	0.462769	0.554162	0.548586
0.915075	0.687201	0.484953	0.493464	0.386665	0.452308	0.375051	0.757319
0.659963	0.193826	0.502008	0.605488	0.726827	0.440966	0.395164	0.732709
0.68344	0.578004	0.399278	0.776849	0.459383	0.508267	0.5317	0.698747
0.917738	0.511935	0.731886	0.361502	0.465824	0.444989	0.504183	0.549351
0.33165	0.738268	0.658593	0.745224	0.0923271	0.42272	0.487271	0.727272
0.842917	0.764274	0.633533	0.695819	0.311311	0.714285	0.533693	0.425566
0.747876	0.767678	0.673535	0.460853	0.502159	0.410063	0.464686	0.707094
0.643549	0.61515	0.676422	0.414225	0.525014	0.380736	0.413642	0.544663
0.836919	0.540952	0.384427	0.627549	0.465143	0.698053	0.934807	0.485733
0.650412	0.486988	0.341455	0.723318	0.444759	0.563933	0.523621	0.45922
0.940938	0.666022	0.73046	0.765993	0.477419	0.560112	0.648917	0.160807
0.941333	0.670957	0.433343	0.374697	0.400874	0.549721	0.593688	0.287917
0.662087	0.527182	0.592954	0.133651	0.221566	0.615725	0.537933	0.748543
0.789531	0.612124	0.142596	0.636637	0.796063	0.698132	0.56321	0.589342
0.679304	0.72472	0.522961	0.671594	0.54979	0.388546	0.387752	0.679408
0.724116	0.754836	0.593701	0.686525	0.670838	0.641858	0.53898	0.268733
0.871531	0.854684	0.819131	0.359932	0.424165	0.748727	0.547601	0.170989
0.927285	0.335428	0.503699	0.571748	0.460284	0.394068	0.530037	0.56157
0.232391	0.619117	0.680499	0.738045	0.454869	0.335097	0.285192	0.546636
0.696466	0.601612	0.459604	0.725246	0.408902	0.572365	0.802142	0.304169
0.687778	0.504733	0.324505	0.685238	0.37851	0.31648	0.260661	0.589334
0.941851	0.781387	0.701484	0.715647	0.345253	0.350736	0.541425	0.32168
0.490475	0.563305	0.547314	0.746865	0.415576	0.621529	0.396971	0.411775
0.432756	0.587984	0.672143	0.76936	0.444468	0.528591	0.566402	0.175352
0.951108	0.782157	0.489627	0.823288	0.485257	0.69935	0.57137	0.407051
0.587717	0.314685	0.554004	0.70481	0.438572	0.649376	0.429861	0.462067
0.624607	0.756422	0.679809	0.596836	0.384001	0.490092	0.0876717
0.2886	0.534853	0.688656	0.65752	0.307189	0.604231	0.436046	0.1033
0.568476	0.40385	0.714517	0.604263	0.578566	0.483199	0.710745	0.403662
0.331973	0.469729	0.863627	0.661115	0.738843	0.646158	0.391639	0.512258
0.927107	0.810267	0.877908	0.665839	0.496818	0.750651	0.692278	0.433067
0.868913	0.697334	0.341345	0.232671	0.344076	0.45164	0.541503	0.489566
0.743186	0.467991	0.676498	0.596728	0.418293	0.683579	0.422834	0.228443
0.566325	0.863356	0.369142	0.555236	0.353956	0.459729	0.376227	0.383894
0.858907	0.728274	0.211459	0.58275	0.753904	0.864679	0.583645	0.479923
0.851102	0.691073	0.452613	0.332556	0.539087	0.574027	0.68896	0.312902
0.46919	0.213306	0.767077	0.42892	0.455591	0.660557	0.603858	0.490901
0.943803	0.682361	0.529927	0.355554	0.501243	0.69748	0.500475	0.498384
0.883317	0.628439	0.51906	0.180173	0.611852	0.330443	0.566529	0.597594
0.843869	0.625064	0.540473	0.208776	0.439697	0.817674	0.637049	0.874924
0.459454	0.596063	0.578052	0.761105	0.693072	0.696084	0.518409	0.597378
0.542021	0.743291	0.410423	0.754775	0.336026	0.602085	0.541475	0.395745
0.851761	0.743123	0.505197	0.609139	0.48052	0.779323	0.538796	0.495548
0.396749	0.440397	0.624742	0.246001	0.477089	0.753249	0.657083	0.492443
0.491111	0.803374	0.443716	0.523872	0.336391	0.621841	0.521309	0.723984
0.738347	0.508366	0.581345	0.620038	0.440191	0.302969	0.558069	0.653157
0.748371	0.806578	0.770406	0.372545	0.528894	0.466698	0.585448	0.745417
0.657044	0.608135	0.711741	0.583635	0.477929	0.812365	0.638756	0.863221
0.325959	0.589665	0.617899	0.671282	0.647886	0.485523	0.457671	0.750964
0.760582	0.489398	0.46199	0.211232	0.448502	0.534387	0.378205	0.456055
0.522676	0.251105	0.611402	0.441998	0.550204	0.626182	0.521963	0.772327
0.782279	0.504466	0.51807	0.593173	0.501089	0.615847	0.37031	0.83789
0.613264	0.518338	0.576526	0.441199	0.524508	0.549576	0.467227	0.857432
0.878433	0.613006	0.604159	0.462047	0.430131	0.726951	0.562489	0.765869
0.532237	0.894484	0.561629	0.653237	0.230072	0.342885	0.453447	0.660589
0.882061	0.823343	0.526809	0.383442	0.553134	0.584484	0.636334	0.732526
0.70342	0.798364	0.486775	0.591051	0.489959	0.132743	0.541547	0.691968
0.812447	0.718736	0.612553	0.598404	0.551547	0.795141	0.442952	0.806044
0.648782	0.841913	0.520178	0.0909509	0.71355	0.69237	0.71158	0.588768
0.640969	0.568314	0.67857	0.390068	0.616232	0.341649	0.63944	0.745804
0.645095	0.339725	0.538052	0.365632	0.452938	0.720388	0.487632	0.646532
0.685985	0.565465	0.451638	0.232196	0.548957	0.647373	0.488297	0.618517
0.772211	0.616528	0.393045	0.3214	0.292852	0.620122	0.415742	0.833832
0.675769	0.914534	0.540275	0.14983	0.496215	0.336484	0.372345	0.39485
	0.599256	0.309593	0.564297	0.594926	0.676557	0.568666	0.684318
0.589295	0.386515	0.595674	0.51354	0.250113	0.694698	0.720925	0.496345
0.413641	0.552884	0.321954	0.462158	0.449047	0.6431	0.576227	0.559867
0.59786	0.428455	0.619386	0.508787	0.587552	0.471543	0.687592	0.909896
0.778921	0.45638	0.527041	0.45506	0.413755	0.60571	0.647245	0.8038
0.577584	0.797266	0.756521	0.450939	0.482841	0.451456	0.772165	0.566662
0.465617	0.767065	0.412609	0.386759	0.472748	0.562641	0.679082	0.355588
0.844498	0.737211	0.697611	0.65836	0.264177	0.367752		0.778565
0.662959	0.615342	0.410786	0.278659	0.494598	0.542622	0.100843	0.477052
0.59605	0.818203	0.441888	0.524946	0.476671	0.404889	0.409432	0.670787
0.644831	0.394749	0.394395	0.696672	0.449567	0.619632	0.473111	0.652912
0.425304	0.650452	0.678574	0.37236	0.434455	0.244028	0.591845	0.807231
0.575731	0.876407	0.556633	0.701461	0.565637	0.428759	0.530758	0.648044
0.589353	0.65489	0.556307	0.395797	0.512644	0.614094	0.454374	0.717749
0.508393	0.505134	0.475273	0.426955	0.446548	0.563058	0.529574	0.472893
0.381622	0.82572	0.482312	0.450738	0.429629	0.169863	0.558561	0.727026
0.623185	0.816447	0.320999	0.779183	0.427694	0.530964	0.602703	0.667682
0.688785	0.805974	0.449558	0.470247	0.352771		0.58581	0.689009
0.291189	0.77427	0.726615	0.62148	0.270435	0.683835	0.36866	0.475254
0.503828	0.589012	0.448905	0.715668	0.523429	0.539054	0.649317	0.603422
0.658718	0.753818	0.120594	0.623417	0.346631	0.496489	0.415007	0.888401
0.802216	0.589868	0.436383	0.732002	0.498676	0.476164	0.726156	0.65094
0.800373	0.712976	0.616403	0.630944	0.471529	0.45768	0.521518	0.700786
0.737369	0.728539	0.591031	0.638539		0.507677	0.790623	0.807535
0.421086	0.608343	0.61524	0.642935	0.0751825	0.611285	0.512128	0.54378
0.616539	0.690693	0.664547	0.703043	0.689629	0.740561	0.630409	0.321749
0.847681	0.490275	0.745199	0.571039	0.50638	0.83743	0.398502	0.657363
0.732612	0.710049	0.683467	0.464349	0.80676	0.573607	0.712425	0.577038
0.682236	0.547725	0.456211	0.216955	0.76598	0.454873	0.585414	0.760423
0.66052	0.470099	0.553309	0.529341	0.492192	0.462037	0.552764	0.405108
0.404182	0.829064	0.482462	0.631009	0.844192	0.781547	0.143708	0.607175
0.340111	0.704123	0.455527	0.341262	0.663599	0.45081	0.52737	0.632654
0.682485	0.6969	0.724605	0.526501	0.614832	0.582634	0.533339	0.709846
0.655585	0.356796	0.559578	0.746635	0.829215	0.474723	0.629134	0.684936
0.544617	0.877062	0.657213	0.275442	0.483808	0.411896	0.412131	0.707959
0.488897	0.771183	0.604333	0.494885	0.43989	0.4356	0.336764	0.503755
0.675415	0.800559	0.516419	0.279989	0.655836	0.718887	0.347001	0.381571
0.46103	0.692883	0.588629	0.598083	0.756012	0.606397	0.628031	0.593723
0.645114	0.64313	0.574447	0.662996	0.660262	0.542397	0.653027	0.6697
0.506709	0.834697	0.826763	0.728064	0.640763	0.772859	0.517645	0.847497
0.614377	0.627917	0.613842	0.483296	0.541114	0.717093	0.401453	0.546555
0.194604	0.548056	0.457366	0.547573	0.663336	0.444592	0.252935	0.891181
0.425531	0.448376	0.51512	0.376587	0.518567	0.593277	0.523634	0.414273
0.489996	0.376198	0.393137	0.63658	0.606304	0.632227	0.434711	0.598744
0.476593	0.506605	0.62138	0.224255	0.523417	0.54823	0.595123	0.468987
0.598597	0.710167	0.498358	0.33551	0.649258	0.649539	0.625841	0.485842
0.737332	0.562144	0.734724	0.419498	0.686112	0.79595	0.770545	0.776273
0.35208	0.518014	0.693217	0.218734	0.393585	0.509315	0.638765	0.737285
0.578476	0.258759	0.670564	0.429309	0.712889	0.556859	0.303514	0.557514
0.587395	0.502789	0.516214	0.585894	0.7901	0.636289	0.560278	0.615098
0.625192	0.767927	0.551905	0.668344	0.538832	0.458182	0.642031	0.642405
0.830464	0.561723	0.360956	0.512332	0.843381	0.503022	0.311751	0.77424
0.853665	0.804731	0.500684	0.0908351	0.902647	0.757096	0.793167	0.500608
0.558775	0.714754	0.433119	0.440135	0.375749	0.719281	0.858262	0.642622
0.112793	0.750411	0.745086	0.316664	0.36701	0.331343	0.616539	0.427881
0.564628	0.899539	0.621969	0.660673	0.542552	0.437018	0.605254	0.5363
0.619044	0.461149	0.269825	0.729076	0.807079	0.65323	0.477876	0.325297
0.768277	0.786948	0.695211	0.776655	0.534231	0.634347	0.49248	0.800541
0.667082	0.602091	0.562902	0.107401	0.484496	0.688686	0.542323	0.474162
0.212372	0.57927	0.33021	0.680987	0.652181	0.471721	0.406538	0.611445
0.682422	0.633372	0.442461	0.685775	0.743676	0.460048	0.514815	0.600669
0.786024	0.656743	0.45593	0.354301	0.653185	0.659873	0.397461	0.478484
0.399529	0.564925	0.65668	0.420341	0.641054	0.601532	0.831922	0.425673
0.374949	0.861834	0.606229	0.581845	0.480063	0.632421	0.718245	0.826185
0.725793	0.612299	0.460935	0.681838	0.69685	0.515366	0.783199	0.703029
0.731465	0.582816	0.557976	0.578888	0.575028	0.63208	0.531285	0.944701
0.4507	0.673046	0.645288	0.364715	0.712523	0.666073	0.760681	0.415348
0.659976	0.569311	0.626889	0.431914	0.674029	0.455894	0.451496	0.395313
	0.354961	0.668398	0.734353	0.516011	0.775712	0.245992	0.917576
0.109271	0.49987	0.573933	0.399878	0.594469	0.713349	0.674684	0.560042
0.752881	0.452588	0.459387	0.438821	0.636456	0.798868	0.366249	0.910175
0.655593	0.72737	0.254022	0.443244	0.4363	0.720816	0.462621	0.771051
0.528972	0.683884	0.468874		0.810546	0.596037	0.587285	0.34295
0.513878	0.66697	0.483563	0.0793409	0.558007	0.632374	0.398995	0.570366
0.300921	0.609324	0.674486	0.843385	0.477534	0.532392	0.451246	0.617139
0.581077	0.441322	0.61107	0.515756	0.793201	0.784795	0.772435	0.475656
0.475666	0.483054	0.400557	0.600764	0.428582	0.396818	0.334343	0.657199
0.454043	0.679366	0.438136	0.772797	0.526148	0.581611	0.501906	0.440727
0.520354	0.718803	0.584844	0.908324	0.723297	0.655816	0.548746	0.524969
0.441747	0.813824	0.739259	0.830083	0.484165	0.517814	0.310899	0.50671
0.339214	0.493729	0.493279	0.47864	0.596646	0.565362	0.549127	0.614306
0.607852	0.780509	0.537019	0.575836	0.577886	0.52012	0.766509	0.503798
0.824447	0.574903	0.498685	0.827292	0.556888	0.30029	0.578713	0.395051
0.348339	0.481769	0.406449	0.690123	0.843995	0.779915	0.514066	0.389383
0.28084	0.758135	0.451459	0.501879	0.617518	0.534909	0.597493	0.522978
0.839916	0.536931	0.530941	0.848312	0.423366	0.309863	0.582579	0.79826
0.721808	0.798253	0.492823	0.631138	0.470299	0.76453	0.339508	0.913822
0.504894	0.456333	0.489146	0.854067	0.573765	0.253128	0.657251	0.739324
0.495309	0.592768	0.399883	0.851249	0.698481	0.673013	0.565684	0.736832
0.641345	0.688147	0.558584	0.387557	0.866237	0.581546	0.592256	0.789537
0.801133	0.445684	0.507099	0.678561	0.721812	0.286906	0.743966	0.633595
0.634032	0.664062	0.435064	0.531147	0.685011	0.596522	0.356308	0.49278
0.78761	0.176023	0.404182	0.744782	0.728822	0.754474	0.44874	0.858001
0.658935	0.682566	0.547151	0.411018	0.583745	0.878742	0.189894	0.360617
0.424765	0.905424	0.577834	0.526335	0.887342	0.396591	0.551658	0.730852
0.639325	0.724708	0.491661	0.592743	0.470133	0.606982	0.740513	0.588361
0.680828	0.467235	0.45874	0.919522	0.61075	0.553206	0.77561	0.586155
0.789691	0.887592	0.619563	0.71995	0.871506	0.876886	0.781052	0.793729
0.348939	0.445438	0.829729	0.873134	0.4682	0.504966	0.794503	0.732584
0.697154	0.598555	0.881121	0.811545	0.629752	0.64231	0.352659	0.539699
0.769633	0.590298	0.646015	0.626904	0.805786	0.688587	0.645489	0.657344
0.704475	0.55469	0.666606	0.699218	0.823527	0.708636	0.758216	0.441774
0.618716	0.630265	0.47431	0.456185	0.68024	0.483786	0.564571	0.850908
0.744062	0.542207	0.602033	0.714307	0.462439	0.694673	0.220621	0.597547
0.626748	0.408217	0.561076	0.3735	0.352093	0.664665	0.481356	0.770061
0.457376	0.45169	0.275057	0.692488	0.607426	0.860742	0.722279	0.736858
0.831517	0.794057	0.318631	0.549428	0.604144	0.779462	0.218082	0.419235
0.642305	0.778199	0.489271	0.808776	0.588712	0.514909	0.567896	0.621354
0.578569	0.775222	0.391521	0.769494	0.41556	0.451779	0.358542	0.383686
0.852618	0.439078	0.337156	0.54741	0.44655	0.697532	0.883479	0.528903
0.61153	0.701207	0.494936	0.398022	0.84305	0.46112	0.575221	0.56361
0.855299	0.500985	0.666906	0.441979	0.501307	0.635067	0.762663	0.675683
0.662637	0.353897	0.48238	0.50614	0.910452	0.619907	0.342676	0.582869
0.586716	0.621783	0.261501	0.759948	0.721575	0.876675	0.456042	0.27136
0.715133	0.421896	0.423792	0.433912	0.510335	0.428586	0.75882	0.395793
0.6442	0.569464	0.43983	0.562832	0.25929	0.416494	0.432496	0.591581
0.774899	0.508896	0.563282	0.689271	0.476354	0.506924	0.628997	0.623211
0.842774	0.54845	0.471557	0.527783	0.453995	0.349631	0.345253	0.510838
0.497693	0.462544	0.384008	0.551042	0.815124	0.576112	0.578864	0.816805
0.7349	0.72278	0.634918	0.429126	0.701973	0.63644	0.505307	0.524423
0.539545	0.522783	0.392167	0.646914	0.81245	0.875292	0.44403	0.687015
0.677954	0.580549	0.39398	0.326358	0.772825	0.426813	0.41782	0.823349
0.66274	0.350622	0.569531	0.311479	0.440361	0.743962	0.521176	0.513534
0.559028	0.31805	0.772587	0.540399	0.518425	0.741882	0.458532	0.736027
0.46768	0.700025	0.400649	0.562067	0.601694	0.532323	0.62443	0.420557
0.525511	0.61159	0.771259	0.416657	0.615724	0.534325	0.645002	0.453349
0.581557	0.606318	0.719936	0.533275	0.642235	0.501719	0.432155	0.618914
0.585664	0.802982	0.642495	0.520583	0.498073	0.753908	0.615334	0.865059
0.585635	0.552119	0.583065	0.53739	0.706624	0.501233	0.403103	0.428328
0.578892	0.741171	0.112826	0.51886	0.821344	0.640347	0.311138	0.475196
0.381093	0.795831	0.494735	0.551256	0.582576	0.555968	0.493658	0.501322
0.844397	0.525435	0.591485	0.52541	0.188795	0.414175	0.632528	0.502453
0.709527	0.643709	0.358545	0.452871	0.31972	0.521162	0.601165	0.518756
0.384419	0.919725	0.211149		0.774536	0.442298	0.506621	0.782049
0.500594	0.445241	0.631986	0.106275	0.451239	0.627485	0.639537	0.606129
0.829153	0.706604	0.434065	0.770595	0.538621	0.368336	0.163304	0.529074
0.898549	0.705711	0.431409	0.751576	0.537284	0.669743	0.406765	0.512854
0.530921	0.613674	0.327866	0.730298	0.824026	0.633816	0.32587	0.59211
	0.37924	0.589525	0.804887	0.310289	0.77684	0.606709	0.243756
0.0927392	0.332858	0.759004	0.743684	0.25288	0.468558	0.777226	0.853476
0.677911	0.427234	0.53421	0.842715	0.635188	0.780769	0.374955	0.768845
0.770139	0.644624	0.594211	0.66018	0.705666	0.944854		0.482092
0.361081	0.737705	0.523508	0.688265	0.350498	0.597524	0.122937	0.324179
0.649146	0.479207	0.332952	0.638506	0.517699	0.591881	0.537267	0.383202
0.726799	0.635564	0.434305	0.670746	0.514196	0.84581	0.581101	0.865198
0.556959	0.168794	0.31368	0.847217	0.453419	0.851428	0.403594	0.872158
0.796689	0.492592	0.34639	0.752677	0.491749	0.717222	0.688476	0.397242
0.69504	0.430256	0.360684	0.753551	0.800644	0.819344	0.321127	0.814033
0.54783	0.573154	0.520804	0.708542		0.85306	0.444445	0.756773
0.681711	0.862801	0.28107	0.757545	0.0945254	0.338231	0.539047	0.862696
0.598846	0.513314		0.711026	0.537389	0.607154	0.681457	0.736873
0.540277	0.381441	0.0707291	0.781449	0.732032	0.433032	0.589289	0.166633
0.636084	0.603175	0.494759	0.693954	0.757095	0.177462	0.255615	0.717472
0.640919	0.579527	0.64505	0.474308	0.50598	0.782408	0.417833	0.432708
0.632898	0.608953	0.643342	0.808103	0.599945	0.206993	0.598063	0.833817
0.477463	0.354159	0.474232	0.578057	0.519584	0.44503	0.373058	0.696572
0.428986	0.498474	0.347802	0.791533	0.509755	0.480193	0.409131	0.21151
0.576403	0.819051	0.614351	0.796322	0.66204	0.675659	0.386244	0.840763
0.613106	0.470275	0.440696	0.626348	0.680003	0.574475	0.316184	0.633778
0.612139	0.838956	0.392734	0.526932	0.609421	0.792938	0.412644	0.577804
0.687066	0.504605	0.53348	0.798995	0.57574	0.559169	0.396204	0.690748
0.67729	0.22345	0.416798	0.691959	0.629739	0.84991	0.219086	0.468403
0.60285	0.567953	0.311075	0.746142	0.375907	0.614662	0.455056	0.707858
0.55475	0.50831	0.634412	0.604113	0.417569	0.556526	0.554213	0.839484
0.720861	0.527821	0.385933	0.691042	0.267475	0.708014	0.479496	0.642997
0.834601	0.312234	0.397313	0.778614	0.267714	0.87693	0.826545	0.508489
0.832366	0.776174	0.492565	0.636029	0.50695	0.676329	0.62208	0.480923
0.620799	0.827884	0.423968	0.786448	0.135697	0.719991	0.434355	0.834747
0.704469	0.820487	0.268172	0.756746	0.522879	0.706329	0.518265	0.765849
0.446825	0.487723	0.570904	0.78713	0.513068	0.69465	0.201118	0.760254
0.328969	0.326416	0.693196	0.729012	0.716528	0.609934	0.482253	0.660138
0.489398	0.604813	0.741769	0.30187	0.866062	0.558269	0.149829	0.530544
0.500968	0.670808	0.535524	0.554344	0.660959	0.671674	0.35313	0.235316
0.61549	0.324988	0.242326	0.858649	0.636585	0.913092	0.550997	0.424963
0.607286	0.785423	0.53874	0.648797		0.528052	0.609771	0.738876
0.395177	0.778664	0.592801	0.809932	0.0933733	0.657284	0.605804	0.762586
0.620151	0.77536	0.432568	0.688721	0.672858	0.601701	0.498498	0.702624
0.419307	0.683101	0.427369	0.869856	0.75812	0.713762	0.582723	0.47716
0.564753	0.281256	0.330327	0.408351	0.268163	0.513442	0.611524	0.122861
0.71906	0.730436	0.564085	0.710915	0.504558	0.708449	0.420716	0.38261
0.633012	0.528594	0.633822	0.851506	0.386793	0.54166	0.498874	0.629696
0.426724	0.36411	0.588553	0.797966	0.298988	0.63518	0.560111	0.359471
0.750962	0.540375	0.551075	0.397272	0.558198	0.716232	0.608186	0.552269
0.761151	0.502418	0.286696	0.500483	0.638282	0.519917	0.538177	0.480812
0.736063	0.304282	0.286895	0.668581	0.404073	0.552213	0.516353	0.419698
0.669851	0.471011	0.470203	0.189567	0.656044	0.53338	0.562336	0.695977
0.739787	0.292765	0.379004	0.566526	0.671467	0.737704	0.439529	0.211248
0.6592	0.4009	0.676999	0.726984	0.503649	0.6487	0.531858	0.720885
0.614965	0.449155	0.710763	0.587253	0.576818	0.699496	0.495413	0.387354
0.708622	0.748633	0.378359	0.533027	0.400359	0.797888	0.649529	0.609914
0.648062		0.460779	0.647273	0.600254	0.548073	0.563307	0.671404
0.824228	0.103254	0.351521	0.677782	0.724263	0.435717	0.561345	0.52947
0.754292	0.508563	0.631703	0.551671	0.561364	0.862367	0.727471	0.822677
0.606291	0.50809	0.404295	0.590126	0.468742	0.80858	0.55383
0.729953	0.795262	0.343041	0.805324	0.845298	0.486179	0.22106	0.0820914
0.36676	0.655889	0.391167	0.781521	0.470032	0.44549	0.546843	0.120686
0.680699	0.550919	0.349949	0.73388	0.522387	0.558679	0.589207	0.589392
0.717294	0.782509	0.545829	0.749215	0.653295		0.657356	0.780704
0.646615	0.677642	0.462755	0.607833	0.33807	0.757768	0.77558	0.628807
0.833836	0.418335	0.742348	0.538786	0.55269	0.507266	0.477006	0.842248
0.340315	0.685637	0.414611	0.59326	0.477299	0.645599	0.56977	0.634771
0.800186	0.580614	0.407457	0.936752	0.400002	0.518648	0.549836	0.779311
0.853673	0.444068	0.268796	0.521738	0.602864	0.538691	0.495668	0.82604
0.668454	0.498583	0.661313	0.891057	0.806866	0.733859	0.470356	0.508271
0.810428	0.497779	0.325454	0.869334	0.599861	0.887798	0.431165	0.638229
0.892268	0.404585	0.610485	0.622298	0.792889	0.492051	0.639889	0.751705
0.652907	0.378884	0.526055	0.860767	0.572315	0.484415	0.433483	0.783949
0.463986	0.696162	0.435519	0.465828	0.314797	0.636903	0.444062	0.657179
0.533823	0.644964	0.224873	0.915624	0.690146	0.434475	0.709425	0.629682
0.793248	0.501182	0.509751	0.735998	0.742826	0.475822	0.667853	0.769219
0.804498	0.459726	0.398736	0.626464	0.477181	0.670578	0.256942	0.703082
0.7994	0.657984	0.374495	0.396652	0.675869	0.593519	0.484321	0.487657
0.815005	0.703277	0.56478	0.540646	0.505358	0.746097	0.425928	0.416651
0.630654	0.720998	0.382017	0.858719	0.469461	0.747361	0.485767	0.636945
0.698456	0.776347	0.543063	0.493313	0.57567	0.756769	0.383103	0.569093
0.593098	0.878321	0.314989	0.573249	0.580748	0.504564	0.513666	0.634014
0.745061	0.49469	0.363689	0.651591	0.445116	0.636717	0.560746	0.346575
0.483172	0.54215	0.339493	0.519947	0.558446	0.772852	0.45093	0.613181
0.577379	0.728004	0.648609	0.843412	0.524044	0.758005	0.530974	0.401101
0.765411	0.311504	0.615054	0.435791	0.406985	0.641219	0.603449	0.632361
0.796061	0.776023	0.681244	0.905333	0.712432	0.568022	0.680029	0.632658
0.822299	0.611295	0.505822	0.822167	0.871572	0.609067	0.807265	0.64204
0.840164	0.508888	0.594623	0.750057	0.442389	0.228873	0.346534	0.895833
0.571458	0.481463	0.645168	0.80275	0.606767	0.441071	0.491791	0.704505
0.790242	0.552942	0.545439	0.67617	0.791244	0.545733	0.594693	0.765648
0.792365	0.820578	0.480881	0.457316	0.695901	0.794301	0.286272	0.905402
0.421107	0.513277	0.66275	0.774704	0.645174	0.770947	0.136731	0.780135
0.815055	0.396613	0.698294	0.666398	0.53452	0.641079	0.696805	0.78145
0.836513	0.486867	0.570379	0.588136	0.363732	0.711954	0.35174	0.615219
0.50383	0.445532	0.475053	0.728347	0.533685	0.386247	0.615668	0.842224
0.541169	0.557113	0.399258	0.708413	0.50522	0.396988	0.576486	0.82117
0.54884	0.34724	0.60255	0.824966	0.211509	0.389574	0.52171	0.775051
	0.299574	0.495846	0.674209	0.449265	0.413592	0.350221	0.888308
0.65138	0.39603	0.474009	0.533963	0.580104	0.838129	0.385779	0.552617
0.59055	0.903654	0.60009	0.162548	0.109845	0.709365	0.537942	0.724201
0.59371	0.484676	0.590355	0.86567	0.398037	0.552939	0.595044	0.615216
0.634012	0.716772	0.657368	0.792605	0.499262	0.62437	0.539452	0.783068
0.646795	0.42324	0.448913	0.613928	0.256255	0.38489	0.486053	0.767336
0.479089	0.694383	0.519386	0.848489	0.313311	0.71465	0.518312	0.697239
0.482672	0.742592	0.55532	0.541401	0.791392	0.471653	0.580391	0.482759
0.637617	0.460949	0.543204	0.836499	0.680859	0.620461	0.51154	0.583457
0.725435	0.762442	0.295962	0.780735	0.510436	0.808876	0.254196	0.854163
0.525374	0.305368	0.622412	0.745187	0.557286	0.596933	0.49685	0.388464
0.372763	0.59637	0.601966	0.836761	0.849341	0.154148	0.272554	0.848031
0.559452	0.677578	0.45169	0.498926	0.703329	0.566237	0.473281	0.451616
0.597606	0.392339	0.582948	0.597187	0.466047	0.417731	0.468313	0.678388
0.763947	0.542332	0.814	0.767574	0.722626	0.620548	0.647116	0.639364
0.793435	0.463769	0.615654	0.451602	0.47453	0.924547	0.424096	0.74417
0.806392	0.418813	0.483629	0.742874	0.559195	0.697291	0.630829	0.65251
0.858883	0.80041	0.374964	0.660942	0.601437	0.472414	0.595052	0.678854
0.590862	0.539308	0.503556	0.418393	0.730845	0.654633	0.652951	0.41485
0.812917	0.444776	0.787464	0.642974	0.822055	0.615936	0.523508	0.791106
0.65152	0.597315	0.594652	0.834474	0.74191	0.732626	0.311967	0.712286
0.854176	0.273661	0.703217	0.473931	0.361023	0.573247	0.624074	0.583359
0.48253	0.411322	0.660555	0.697197	0.509112	0.497815	0.495239	0.757581
0.585961	0.513329	0.439026	0.457657	0.801475	0.693053	0.601619	0.357671
0.580168	0.510289	0.602121	0.518967	0.289241	0.566184	0.726819	0.633233
0.641976	0.397068	0.5943	0.617702	0.570915	0.489284	0.573738	0.821611
0.780377	0.35865	0.395034	0.813076	0.519484	0.534602	0.529816	0.617154
0.656681	0.670857	0.598241	0.325049	0.410347	0.538327	0.608842	0.824339
0.726746	0.453878	0.668447	0.735392	0.422486	0.561024	0.569022	0.623346
0.541159	0.702541	0.64132	0.563226	0.641251	0.734296	0.848591	0.421597
0.812564	0.370301	0.576815	0.573084	0.604102	0.71905	0.432451	0.633662
0.484876	0.69071	0.44976	0.518191	0.533841	0.666789	0.37609	0.541117
0.719073	0.475119	0.365343	0.904965	0.363386	0.637429	0.487865	0.44673
0.69277	0.940335	0.746684	0.765914	0.322192	0.759171	0.547668	0.719363
0.530893	0.421056	0.582603	0.351107	0.328166	0.654274	0.483834	0.753962
0.786245	0.597752	0.514422	0.683316	0.79028	0.628519	0.554433	0.274528
0.652599	0.551891	0.570505	0.579296	0.532696	0.533435	0.33205	0.486884
0.683715	0.457702	0.392039	0.662108	0.359827	0.634815	0.557004	0.698174
0.597721	0.610955	0.476081	0.721888	0.512167	0.378773	0.388345	0.364353
0.713387	0.432713	0.354754	0.826053	0.274064	0.629346	0.410734	0.480014
0.764887	0.422508	0.500297	0.478672	0.479664	0.658937	0.537468	0.513681
0.609307	0.824961	0.457702	0.532669	0.661309	0.666415	0.449542	0.290693
0.46633	0.759493	0.56795	0.892042	0.486744	0.800456	0.257124	0.686262
0.405771	0.890979	0.314246	0.698107		0.789537	0.593203	0.479428
0.668141	0.626324	0.582161	0.742407	0.0667147	0.576687	0.451447	0.583736
0.899829	0.668084	0.629933	0.816246	0.44401	0.555979	0.615556	0.487403
0.756775	0.297844	0.613075	0.76312	0.765069	0.780824	0.0873459	0.696092
0.866791	0.382205	0.592396	0.880186	0.609755	0.817263	0.525976	0.767728
0.630372	0.868674	0.532413	0.591682	0.297092	0.691268	0.370969	0.541003
0.595899	0.462761	0.356788	0.625155	0.365948	0.437048	0.603186	0.297401
0.534164	0.749089	0.557631	0.393769	0.460697	0.456431	0.436985	0.514529
0.714514	0.38367	0.785963	0.646514	0.342819	0.772346	0.375234	0.738494
0.438614	0.542955	0.505481	0.777452	0.380461	0.116061	0.586686	0.401127
0.597627	0.594891	0.539406	0.568395	0.323643	0.421153	0.404979	0.643891
0.320096	0.722968	0.550271	0.661797	0.344594	0.741273	0.467281	0.730262
0.852928	0.423418	0.268228	0.684848	0.455067	0.463555	0.367816
0.53475	0.518409	0.613654	0.921906	0.449505	0.84544	0.494953	0.0940474
0.576338	0.907012	0.544433	0.742569	0.406081	0.492669	0.468983	0.578522
0.838134	0.697695	0.711595	0.396619	0.59909	0.575173	0.502908	0.549623
0.795649	0.91588	0.354791	0.766104	0.54604	0.720147	0.573773	0.314096
0.447451	0.877198	0.512058	0.669684	0.406918	0.542544	0.540965	0.396609
0.833112	0.621321	0.390736	0.739382	0.391202	0.804331	0.358137	0.470094
0.604643	0.352009	0.317198	0.546892	0.65424	0.508391		0.465803
0.841433	0.562056	0.473396	0.865382	0.404437	0.459046	0.421036	0.733463
0.54874	0.48969	0.702342	0.467832	0.444582	0.568938	0.365091	0.480145
0.316161	0.66344	0.418412	0.541493	0.55097	0.783603	0.363025	0.702102
0.511252	0.52064	0.752336	0.773402	0.556226	0.333022	0.582033	0.711774
0.843009	0.535885	0.452126	0.80036	0.366545	0.404627	0.477053	0.821719
0.802226	0.546654	0.641972	0.813236	0.471858	0.672008	0.3201	0.632056
0.568306	0.4493	0.559802	0.903615	0.405814	0.591	0.545755	0.538901
0.718374	0.66573	0.463597	0.149468	0.50476	0.605202	0.496946	0.612115
0.862119	0.218694	0.308535	0.477642	0.454166	0.667207	0.448596	0.708958
0.771626	0.577904	0.308972	0.790815	0.302136	0.441426	0.411138	0.629502
0.601501	0.62784	0.653612	0.622799	0.303618	0.754953	0.450917	0.851528
0.548165	0.828946	0.216801	0.609201	0.569771	0.587094	0.223285	0.556706
0.695486	0.450367	0.356054	0.795355	0.457789	0.787617	0.44604	0.410967
0.543032	0.628761	0.462468	0.669555	0.362086	0.244181	0.481946	0.585734
0.643887	0.695477	0.525078	0.771937	0.344659	0.410215	0.557353	0.31244
0.748845	0.431234	0.575746	0.507386	0.404593	0.40153	0.434547	0.581016
0.641861	0.48574	0.559965	0.737434	0.344653	0.397937	0.518578	0.494719
0.592098	0.624911	0.615576	0.631803	0.505507	0.531073	0.425305	0.328327
0.577108	0.637235	0.434772	0.815302	0.52064	0.439253	0.572259	0.74114
0.752958	0.592679	0.45359	0.812756	0.611481	0.344787	0.584436	0.581988
0.796893	0.524791	0.403549	0.674903	0.400948	0.699229	0.322653	0.660025
0.383733	0.690574	0.53786	0.76022	0.480878	0.651387	0.295959	0.382739
0.433746	0.715231	0.277377	0.661532	0.464227	0.751981	0.507342	0.327374
0.8233	0.68959	0.37146	0.57476	0.330183	0.438872	0.571215	0.908485
0.61678	0.695145	0.565662	0.763716	0.324002	0.727213	0.420786	0.399878
0.586217	0.397976	0.480257	0.514999	0.379744	0.823795	0.62078	0.780929
0.367699	0.475153	0.3327	0.413665	0.431388	0.353522	0.444276	0.810102
0.783966	0.647852	0.452305	0.746349	0.381384	0.636124	0.306654	0.746194
0.514251	0.763324	0.631674	0.53354	0.564444	0.550427	0.63559	0.807924
0.471944	0.412677	0.521508	0.689267	0.345243	0.695392	0.533897	0.768492
0.60418	0.441285	0.605876	0.804763	0.383608	0.475519	0.587343	0.564398
0.774353	0.89763	0.465706	0.66006	0.457421	0.403217	0.469479	0.456006
0.778433	0.775615	0.301264	0.872571	0.611596	0.436614	0.621391	0.711053
0.575555	0.416881	0.379036	0.890542	0.501199	0.59124	0.545794	0.296171
0.687151	0.573538	0.373629	0.432825	0.352719	0.780251	0.718069	0.453119
0.555304	0.470561	0.446136	0.567634	0.348701	0.694612	0.543016	0.54511
0.856012	0.309275	0.638431		0.488728	0.630404	0.546207	0.638906
0.421017	0.598215	0.247727	0.0701783	0.455629	0.576713	0.237451	0.565919
0.579647	0.480792	0.348379	0.511439	0.395078	0.678412	0.468637	0.37113
0.564719	0.694077	0.409259	0.667554	0.31128	0.694116	0.550365	0.598834
0.414592	0.728652	0.539199	0.682712	0.471624	0.368893	0.484753	0.646208
0.733201	0.313201	0.517292	0.62298	0.428013	0.538218	0.469547	0.377372
0.527968	0.602379	0.541467	0.712406	0.430723	0.536856	0.401166	0.897384
0.332002	0.470468	0.41104	0.775577	0.347429	0.504784	0.559097	0.738797
0.670188	0.851769	0.477107	0.504636	0.367669	0.453049	0.403324	0.514174
0.824546	0.54753	0.432928	0.627926	0.438481	0.458767	0.52012	0.456973
0.703946	0.492249	0.406127	0.579994	0.454583	0.37506	0.309606	0.649031
0.596843	0.888173	0.335683	0.614175	0.597885	0.509689	0.724061	0.218089
0.45531	0.74186	0.526169	0.773368	0.720366	0.42549	0.413565	0.509914
0.680826	0.398084	0.36656	0.586523	0.612162	0.686741	0.506095	0.558254
0.367261	0.738256	0.808082	0.710052	0.378068	0.593587	0.344283	0.685078
0.390015	0.543923	0.431881	0.625211	0.566154	0.856463	0.25695	0.404935
0.708032	0.470224	0.766463	0.628819	0.432856	0.700827	0.528308	0.650994
0.777012	0.514165	0.332321	0.717562	0.561314	0.563026	0.46155	0.750732
0.580213	0.608011	0.317322	0.445865	0.488322	0.536199	0.431792	0.34973
0.701704	0.764355	0.473858	0.69887	0.377049	0.28478	0.439388	0.446374
0.55614	0.579278	0.35625	0.75701	0.249928	0.495944	0.461429	0.388355
0.71334	0.622691	0.425261	0.471058	0.576468	0.467757	0.345918	0.362665
0.685429	0.63171	0.565677	0.844708	0.579423	0.590717	0.154638	0.469182
0.506576	0.30504	0.524003	0.43519	0.489383	0.346126	0.386193	0.454201
0.44581	0.368317	0.408103	0.41719	0.494374	0.721736	0.476611	0.718488
0.836259	0.656954	0.327566	0.764557	0.415521	0.607903	0.290337	0.408672
0.206933	0.579689	0.446396	0.683328	0.305968	0.488656	0.335856	0.454
0.698325	0.782149	0.400237	0.754001	0.405836	0.439438	0.548541	0.678683
0.642562	0.431915	0.497134	0.737455	0.529762	0.8801	0.118648	0.736791
0.566132	0.52976	0.300035	0.784306	0.220333	0.360827	0.495302	0.646623
0.63245	0.52691	0.301125	0.799111	0.480307	0.785513	0.42506	0.481508
0.430739	0.31964	0.374268	0.461076	0.442113	0.45911	0.254227	0.58718
0.854316	0.849244	0.611312	0.824232	0.662247	0.408904	0.174911	0.640578
0.706912	0.344507	0.481358	0.571092	0.552481	0.431999	0.457057	0.684146
0.930056	0.442617	0.507655	0.454327	0.451545	0.51146	0.240558	0.830458
0.13073	0.392103	0.535828	0.523507	0.653721	0.280854	0.276215	0.0983468
0.638055	0.884129	0.464136	0.539957	0.617489	0.43224	0.374788	0.540958
0.822033	0.534127	0.478793	0.343763	0.878438	0.374552	0.525776	0.632438
0.795711	0.684899	0.403712	0.550505	0.558402	0.448667	0.579434	0.493417
0.66614	0.419016	0.146613	0.341013	0.55301	0.200718	0.642496	0.470254
0.865474	0.74279	0.67871	0.658913	0.385947	0.652872	0.451999	0.496484
0.672612	0.665233	0.607578	0.417764	0.312443	0.480039	0.290383	0.398765
0.591112	0.602591	0.55848	0.705107	0.520883	0.532847	0.716087	0.511533
0.70718	0.197518	0.461972	0.327839	0.469209	0.931634	0.537428	0.659817
0.817533	0.75723	0.454183	0.500271	0.499988	0.84898	0.668555	0.592075
0.647687	0.782896	0.508061	0.43587	0.496676	0.442121	0.578691	0.666168
0.873419	0.693987	0.374559	0.610974	0.400619	0.708946	0.250333	0.643881
0.757867	0.620099	0.493356	0.416256	0.5326	0.59105	0.472476	0.352153
0.567402	0.354171	0.230033	0.792619	0.617459	0.440809	0.453449	0.704608
0.638244	0.523975	0.554687	0.307275	0.470223	0.776257	0.543164	0.700098
0.834197	0.628965	0.463662	0.549247	0.346299	0.533467	0.40956	0.409683
0.658286	0.784816	0.243595	0.393966	0.7063	0.821415	0.501395	0.555716
0.565948	0.304412	0.481058	0.671605	0.440838	0.235192	0.269497	0.681132
0.718449	0.585786	0.761753	0.43304	0.525438	0.373954	0.408919	0.530454
0.508019	0.490206	0.447781	0.942498	0.431684	0.280383	0.442049	0.287819
0.67714	0.768841	0.525514	0.419458	0.531883	0.570589	0.49042	0.783731
0.837048	0.789719	0.426027	0.450334	0.546079	0.567972	0.424608	0.630323
0.821827	0.687732	0.424178	0.484364	0.41622	0.502221	0.399696	0.558498
0.80239	0.745272	0.409328	0.764917	0.832684	0.663664	0.494259	0.577686
0.683727	0.392967		0.58293	0.517854	0.562043	0.270228	0.753124
0.79329	0.616711	0.623089	0.290336	0.630171	0.675178	0.38944	0.605496
0.639419	0.558317	0.687243	0.296575	0.534764	0.567638	0.652796	0.522534
0.75245	0.749777	0.534946	0.490039	0.283134	0.377468	0.337058	0.616408
0.646829	0.650341	0.422502	0.523934	0.588766	0.443631	0.304202	0.364653
0.63553	0.522815	0.621081	0.539664	0.56489	0.548721	0.404678	0.513153
0.636304	0.47851	0.617727	0.395486	0.601064	0.632997	0.511752	0.25951
0.689959	0.772769	0.683463	0.603099	0.47648	0.454502	0.761839	0.691965
0.488585	0.385005	0.401004	0.618838	0.415291	0.298798	0.310435	0.517141
0.578687	0.513464	0.621803	0.49055	0.607055	0.542654	0.46582	0.80032
0.755466	0.837178	0.565824	0.598164	0.55452	0.437323	0.566498	0.558625
0.6189	0.660266	0.680676	0.554086	0.534582	0.473923	0.486782	0.344497
0.827209	0.642903	0.386139	0.675122	0.357106	0.663548	0.455697	0.682338
0.808115	0.200765	0.637436	0.451395	0.526511	0.557268	0.435743	0.478817
0.805656	0.398778	0.581527	0.473254	0.460294	0.0796428	0.491096	0.590006
0.5838	0.586352	0.483398	0.660588	0.653472	0.352453	0.421336	0.682408
0.693031	0.580707	0.488618	0.467783	0.42049	0.590087	0.312672	0.766396
0.725026	0.789846	0.608565	0.560254	0.594979	0.813464	0.343648	0.730359
0.71052	0.903923	0.840364	0.68631	0.418839	0.5991	0.376206	0.806799
0.623391	0.663645	0.7168	0.344117	0.548029	0.700163	0.50083	0.591097
0.579278	0.480679	0.90427	0.232753	0.376672	0.714945	0.545327	0.440688
0.60805	0.43131	0.696152	0.463781	0.603006	0.402582	0.480864	0.407792
0.84191	0.795589	0.563411	0.694616	0.26537	0.654242	0.399039	0.7164
0.688083	0.588662	0.855474	0.287271	0.488538	0.572481	0.566467	0.77214
0.527104	0.298049	0.555344	0.828871	0.529818	0.501497	0.309445	0.40797
0.777531	0.644687	0.549159	0.559938	0.306464	0.490475	0.454904	0.34557
0.522101	0.605988	0.66783	0.423508	0.668968	0.774497	0.851789	0.430512
0.528356	0.597116	0.111703	0.689628	0.467286	0.193403	0.57534	0.727979
0.714603	0.725049	0.442975	0.88725	0.415255	0.327474	0.504666	0.534036
0.589308	0.774895	0.291016	0.525778	0.235538	0.506262	0.404437	0.153244
0.562975	0.650387	0.502307	0.509075	0.344477	0.646293	0.308966
0.783982	0.831419	0.269576	0.46993	0.512067	0.51923	0.30873	0.0821586
0.661684	0.690562	0.489906	0.623744	0.497792	0.640849	0.577937	0.777824
0.430909	0.44585	0.396758	0.418347	0.525209	0.462572	0.364062	0.417854
0.649621	0.561738		0.348581	0.388304	0.413331	0.40601	0.826172
0.812474	0.832713	0.612871	0.679319	0.530524	0.574	0.532578	0.629462
0.887023	0.659803	0.42426	0.372092	0.682381		0.23902	0.710365
0.816678	0.803545	0.543638	0.576067	0.607905	0.877452	0.624311	0.534918
0.855	0.868214	0.658067	0.560397	0.418438	0.677786	0.531142	0.676292
0.812797	0.379064	0.658908	0.572354	0.360703	0.619758	0.0816402	0.885307
0.691605	0.413683	0.701936	0.455232	0.262964	0.704282	0.521087	0.614781
0.772621	0.733736	0.493205	0.889362	0.504627	0.853732	0.290285	0.313009
0.737075	0.801466	0.69133	0.460189	0.516454	0.547882		0.598925
0.743757	0.801743	0.484635	0.855229	0.348299	0.79649	0.68155	0.810656
0.540264	0.630328	0.403715	0.765618	0.616741	0.403923	0.374382	0.562419
0.77958	0.67836	0.360419	0.240896	0.51182	0.7624	0.735677	0.752503
0.675073	0.780819	0.514411	0.316484	0.540036	0.631148	0.381491	0.40187
0.776677	0.682411	0.27344	0.349975	0.698069	0.751909	0.598162	0.458498
0.775382	0.452341	0.300544	0.657316	0.504005	0.548825	0.545641	0.546196
0.667457	0.297873	0.373266	0.882536	0.385722	0.51154	0.54681	0.372488
0.677798	0.4945	0.448607	0.524932	0.503935	0.744503	0.437967	0.827567
0.659639	0.818949	0.360537	0.772578	0.561332	0.497005	0.690349	0.782882
0.578804	0.82181	0.380107	0.471824	0.502555	0.686203	0.690145	0.390884
0.820327	0.62295	0.38727	0.898125	0.516966	0.880153	0.445198	0.484374
0.721782	0.555444	0.460118	0.603053	0.513391	0.931242	0.655674	0.87053
0.866397	0.333957	0.0937667	0.904908	0.544988	0.393389	0.618663	0.536376
0.861534	0.892787	0.420603	0.754943	0.608361	0.425552	0.476664	0.860597
0.715198	0.670214	0.399306	0.210457	0.358615	0.875067	0.577902	0.663802
0.551759	0.630045	0.597932	0.289025	0.615103	0.807616	0.492741	0.677566
0.72868	0.622437	0.307556	0.666759	0.718008	0.857245	0.794961	0.42575
0.780529	0.675998	0.532477	0.578067	0.87389	0.68939	0.386236	0.444241
0.824236	0.721111	0.522936	0.704814	0.215013	0.704757	0.362409	0.71938
0.635257	0.761724	0.468137	0.630292	0.3253	0.513351	0.481079	0.333188
0.814684	0.174007	0.455014	0.545698	0.824663	0.628811	0.481857	0.615201
0.881935	0.529467	0.616431	0.371633	0.662103	0.469347	0.457996	0.655461
0.785309	0.679523	0.578204	0.833681	0.426288	0.508707	0.463247	0.826621
0.855092	0.536866	0.364793	0.562832	0.494626	0.669625	0.441547	0.697527
0.778046	0.769974	0.511333	0.722246	0.529961	0.586645	0.745823	0.569974
0.801798	0.508693	0.81425	0.589075	0.491575	0.74771	0.608549	0.781221
0.771849	0.449493	0.545087	0.662049	0.553313	0.892605	0.730394	0.459956
0.886928	0.241147	0.458171	0.556989	0.486335	0.790805	0.601912	0.744505
0.799009	0.505511	0.506532	0.239593	0.7267	0.86368	0.429847	0.575381
0.880668	0.661692	0.488461	0.334341	0.320717	0.803374	0.344332	0.662535
0.702506	0.60017	0.571688	0.697067	0.516032	0.764901	0.545509	0.722104
0.745171	0.876276	0.431371	0.762663	0.471939	0.559858	0.675589	0.709146
0.753801	0.814958	0.425219	0.657643	0.713921	0.709475	0.368174	0.432845
0.738695	0.80807	0.449985	0.919092	0.563673	0.431564	0.336015	0.812986
0.903603	0.830793	0.578821	0.771451	0.535506	0.493079	0.52296	0.504693
0.839926	0.740182	0.531709	0.79969	0.437691	0.514622	0.376467	0.550973
0.700037	0.541958	0.534821	0.511445	0.639052	0.326574	0.395986	0.702126
0.717275	0.814144	0.642972	0.625107	0.767608	0.357274	0.451346	0.173919
0.779319	0.412105	0.450015	0.860937	0.262454	0.492888	0.531803	0.267256
0.884021	0.679281	0.444134	0.76624	0.472446	0.846331	0.600029	0.754819
0.779289	0.750196	0.256082	0.912291	0.663943	0.863214	0.703837	0.672319
0.880287	0.438307	0.567279	0.435766	0.592587	0.645239	0.495962	0.351545
0.589932	0.624123	0.281223	0.636816	0.419183	0.73408	0.824678	0.736693
0.638003	0.35741	0.413845	0.553829	0.440622	0.638132	0.61143	0.488544
0.670142	0.618968	0.350419	0.783231	0.339686	0.867712	0.537272	0.758009
0.825525	0.556189	0.515312	0.710535	0.34649	0.476644	0.650229	0.780062
0.600113	0.467308	0.537858	0.639017	0.466386	0.51545	0.544167	0.444617
0.855761	0.875749	0.485448	0.616208	0.290657	0.592558	0.508635	0.853962
0.882923	0.348019	0.466975	0.838823	0.418616	0.827533	0.492628	0.616279
0.875736	0.857921	0.513798	0.392769	0.519748	0.620856	0.631987	0.915991
0.670843	0.715358	0.0868774	0.570287	0.412517	0.431096	0.584163	0.814671
0.707727	0.754414	0.45647	0.642969	0.397873	0.713679	0.576215	0.578174
0.755442	0.481788		0.693736	0.323019	0.586894	0.260366	0.932864
0.809634	0.607421	0.813388	0.557761	0.305918	0.518228	0.795286	0.178992
0.872929	0.57722	0.455574	0.562872	0.507069	0.819414	0.679229	0.643378
0.873868	0.885436	0.572978	0.327938	0.495308	0.833079	0.624317	0.59873
0.814421	0.345994	0.613594	0.718437	0.511933	0.580349	0.402508	0.407565
0.839514	0.376964	0.66662	0.576735	0.342849	0.84087	0.574837	0.704826
0.726837	0.907442	0.547555	0.540553	0.339125	0.836033	0.617118	0.694711
0.774543	0.734073	0.51212	0.686596	0.631399	0.782385	0.586534	0.511229
0.869632	0.885439	0.672775	0.842833	0.60498	0.713706	0.581758	0.732344
0.670479	0.417186	0.664377	0.72287	0.634635	0.455535	0.356683	0.854473
0.592284	0.720832	0.725108	0.629289	0.604311	0.811466	0.663194	0.721614
0.853043	0.60475	0.825275	0.803748	0.607848	0.487565	0.416294	0.60047
0.700584	0.64741	0.839254	0.771007	0.478799	0.339137	0.618709	0.552622
0.529526	0.465541	0.522905	0.614401	0.400029	0.816581	0.248158	0.337753
0.87275	0.564143	0.758268	0.62546	0.23032	0.602058	0.747945	0.702501
0.619566	0.698304	0.726051	0.772295	0.596105	0.719435	0.4242	0.533603
0.587615	0.304276	0.637877	0.443275	0.529713	0.486187	0.619188	0.369417
0.781316	0.329623	0.603926	0.677697	0.345302	0.365903	0.523998	0.350436
0.783163	0.416723	0.583445	0.459891	0.587871	0.461216	0.5727	0.182647
0.716619	0.884929	0.735081	0.716492	0.456823	0.802458	0.665132	0.649673
0.771423	0.540715	0.597246	0.412686	0.398688	0.377108	0.407384	0.421993
	0.395851	0.649918	0.488283	0.247141	0.914645	0.426272	0.723045
0.0883903	0.482624	0.70484	0.591735	0.440979	0.616662	0.657639	0.396069
0.743896	0.621607	0.538863	0.71416	0.558175	0.628742	0.324605	0.558506
0.757418	0.65537	0.723448	0.555446	0.501873	0.763455	0.519491	0.377753
0.331929	0.233688	0.388567	0.643543	0.332657	0.780428	0.526089	0.570457
0.685069	0.513977	0.664711	0.76921		0.636483	0.527897	0.475362
0.7036	0.760396	0.544837	0.661023	0.463238	0.656473	0.504489	0.590019
0.697546	0.572817	0.489975	0.756754	0.654364	0.713983	0.494446	0.406535
0.708631	0.786721	0.585702	0.746068	0.658612	0.89253	0.282111	0.686963
0.558221	0.589742	0.404949	0.776316	0.536062	0.516533	0.604461	0.114362
0.666937	0.670255	0.736032	0.363581	0.535084	0.433949	0.489459	0.439089
0.547709	0.704626	0.631704	0.787694	0.462544	0.590573	0.367884	0.371566
0.588977	0.878187	0.608456	0.42166	0.693105	0.533177	0.594467	0.611419
0.594553	0.702069	0.4047	0.500245	0.507571	0.621452	0.51078	0.768426
0.624239	0.761217	0.491645	0.34967	0.706244	0.624734	0.717776	0.730082
0.406818	0.715112	0.509213	0.612916	0.479984	0.72986	0.44288	0.279471
0.596574	0.490846	0.526957	0.70174	0.511064	0.724655	0.436854	0.802625
0.664009	0.513987	0.814293	0.590952	0.654385	0.718764	0.603826	0.725135
0.484406	0.622481	0.447275	0.632854	0.409336	0.255925	0.645703	0.517092
0.648873	0.640376	0.729008	0.605327	0.651537	0.848839	0.7771	0.317657
0.736185	0.586873	0.640033	0.345719	0.691318	0.65504	0.362752	0.505515
0.568799	0.915946	0.511242	0.337658	0.625171	0.458362	0.33975	0.610298
0.398926	0.620835	0.489659	0.846368	0.491881	0.679659	0.325328	0.573818
0.627589	0.784552	0.648827	0.514385	0.716126	0.853141	0.692205	0.395116
0.644048	0.545612	0.533144	0.254527	0.517051	0.572512	0.544751	0.530012
0.614551	0.402256	0.48327	0.736781	0.590646	0.289821	0.621979	0.759964
0.869529	0.355298	0.665925	0.783906	0.722196	0.457492	0.453817	0.573098
0.691454	0.500812	0.404351	0.680601	0.357204	0.387335	0.508144	0.449075
0.493063	0.740713	0.660601	0.64745	0.3431	0.484226	0.224878	0.375425
0.861106	0.90179	0.743654	0.387501	0.638768	0.803207	0.353873	0.460367
0.679522	0.615603	0.832923	0.408722	0.673992	0.571767	0.462064	0.606187
0.541882	0.29152	0.841116	0.687868	0.229038	0.52747	0.430384	0.403434
0.818167	0.545281	0.463116	0.0998975	0.693497	0.52061	0.666764	0.545222
0.573497	0.663004	0.70098	0.719607	0.661123	0.704382	0.403143	0.563466
0.385779	0.518492	0.518358	0.522575	0.50442	0.761533	0.56658	0.463617
0.606623	0.345898	0.582766	0.606687	0.523118	0.880126	0.446765	0.237441
0.644057	0.713798	0.658672	0.420466	0.646287	0.867238	0.295919	0.493191
0.914274	0.37096	0.572537	0.728993	0.519962	0.622052	0.398814	0.497546
0.603875	0.738702	0.289661	0.750038	0.539977	0.370561	0.726092	0.464834
0.732283	0.6937	0.672497	0.775441	0.651313	0.553839	0.533226	0.542748
0.421007	0.864158	0.602663	0.463817	0.707804	0.510276	0.730057	0.647638
0.532444	0.638501	0.481973	0.477775	0.500761	0.68391	0.467274	0.411921
0.747123	0.770085	0.1226	0.782991	0.334731	0.885222	0.504846	0.121108
0.604184	0.628582	0.769134	0.767627	0.658922	0.750062	0.706786	0.240187
0.733352	0.502532	0.686597	0.768938	0.637227	0.642809	0.748775	0.388526
0.364091	0.138435	0.674129	0.729436	0.371408	0.626389	0.75639	0.688953
0.725431	0.469752	0.464609	0.742131	0.531347	0.834462	0.642667	0.55019
0.76962	0.627391	0.434113		0.527819	0.579822	0.642679	0.238455
0.71205	0.407584	0.568406	0.118501	0.754542	0.755635	0.610189	0.449899
0.49903	0.467222	0.673801	0.481675	0.41528	0.49525	0.563661	0.481723
0.504526	0.452821	0.629828	0.559987	0.626426	0.519622	0.524276
0.485932	0.714362	0.659668	0.756179	0.625992	0.815198	0.568584	0.293217
0.52618	0.727183	0.798324	0.570538	0.399969	0.57376	0.569621	0.528407
0.762896	0.73042	0.676872	0.618093	0.589779	0.410578	0.511959	0.518132
0.69104	0.638024	0.657293	0.729457	0.564086	0.486751	0.4263	0.499559
0.775773	0.272854	0.598193	0.626481	0.479698	0.482327	0.607019	0.403272
0.584962	0.517441	0.577121	0.761672	0.450505	0.889981	0.571068	0.464972
0.470618	0.455572	0.767502	0.471534	0.43737	0.524423	0.163864	0.576306
0.578018	0.246269	0.575083	0.537239	0.589006	0.681996	0.34816	0.814997
0.303285	0.297025	0.481901	0.593462	0.630259	0.53918	0.580637	0.336703
0.517707	0.63487	0.48672	0.672209	0.618584	0.691719	0.69853	0.385819
0.605519	0.816372	0.597728	0.432562	0.470733	0.843775	0.497303	0.769272
0.914535	0.417363	0.48354	0.478539	0.48705	0.61976	0.486963	0.379131
0.490173	0.593717	0.914594	0.71981	0.867652	0.577426	0.851939	0.179985
0.772718	0.740697	0.827477	0.811834	0.580343	0.351875	0.558804	0.337485
0.694492	0.431782	0.89192	0.495621	0.718229	0.557108	0.669421	0.420216
0.843601	0.645254	0.741182	0.618804	0.466458	0.688511	0.488109	0.637719
0.724011	0.676056	0.521339	0.843114	0.564401	0.598373	0.338779	0.709658
0.677107	0.846284	0.574494	0.563251	0.201986	0.515973	0.441668	0.319914
0.676634	0.564764	0.523867	0.415429	0.360418	0.414108	0.470232	0.768272
0.583979	0.626206	0.565163	0.560409	0.661981	0.727103	0.409818	0.856619
0.230563	0.609692	0.546479	0.70817	0.604598	0.7646	0.64097	0.547894
0.596828	0.365937	0.746357	0.630175	0.489406	0.395746	0.566875	0.488108
0.550989	0.520817	0.563574	0.538544	0.507191	0.337241	0.486699	0.483671
0.678665	0.740454	0.468019	0.669576	0.781331	0.835221	0.398891	0.430886
0.539857	0.643913	0.83455	0.589386	0.505988	0.923073	0.692427	0.277653
0.189757	0.65577	0.899857	0.251403	0.338213	0.491297	0.61562	0.410836
0.479637	0.447431	0.44293	0.798167	0.261668	0.702046	0.66818	0.571349
0.49285	0.227898	0.900133	0.380024	0.445656	0.866671	0.541303	0.545116
0.733779	0.67598	0.783965	0.712227	0.484197	0.705093	0.59486	0.628795
0.569433	0.710293	0.547014	0.756294	0.465905	0.619734	0.333028	0.538413
0.861385	0.144268	0.403425	0.838584	0.748998	0.811679	0.456234	0.288761
0.273617	0.326677	0.691311	0.416012	0.566178	0.642169	0.480988	0.619379
0.689871	0.501876	0.446875	0.819974	0.388218	0.75329	0.466132	0.486513
0.83444	0.591329	0.797845	0.502774	0.395053	0.661524	0.726042	0.586353
0.714999	0.719558	0.551932	0.72446	0.617973	0.820303	0.453811	0.435555
0.552572	0.488579	0.75945	0.611279	0.441424	0.740086	0.560425	0.459918
0.424901	0.521785	0.483834	0.799564	0.743578	0.662	0.415634	0.447367
0.232258	0.433805	0.716258	0.825951	0.469562	0.670068	0.756231	0.786168
0.825482	0.571573	0.673795	0.498029	0.617025	0.589152	0.695712	0.446091
0.352035	0.279975	0.726723	0.647026	0.226646	0.918331	0.429047	0.411274
0.495246	0.452209	0.544529	0.73267	0.372607	0.236212	0.61179	0.354707
	0.725015	0.341341	0.468461	0.602008	0.419859	0.569877	0.414191
0.721342	0.458579	0.375125	0.624329	0.338803	0.827797	0.456259	0.555592
0.252842	0.513373	0.524875	0.276145	0.567523	0.738182	0.78064	0.346366
0.759427	0.854412	0.46808	0.439648	0.335115	0.818521	0.565192	0.476837
0.776429	0.799095	0.579213	0.586628	0.535366	0.256433	0.576898	0.697704
0.576251	0.52497	0.591134	0.803199	0.598834	0.471065	0.388279	0.688823
0.616192	0.368299	0.688223	0.41829	0.461115	0.850297	0.469091	0.489657
0.557157	0.211447	0.620652	0.540952	0.573841	0.629276	0.235099	0.624793
0.649529	0.78567	0.369005	0.737691	0.640999	0.831353	0.643241	0.355211
0.6911	0.591864	0.575005	0.386864	0.512738	0.762803	0.59869	0.294864
0.629589	0.407285	0.597054	0.517368	0.440868	0.593496	0.738771	0.337236
0.855643	0.349304	0.649978	0.433428	0.529689	0.624965	0.520803	0.513747
0.590976	0.386229	0.462132	0.540978	0.601207	0.407477	0.762779	0.543857
0.556728	0.438984	0.573979	0.701953	0.833785	0.824896	0.441083	0.590346
0.61484	0.577096	0.858354	0.660593	0.530894	0.823206	0.656331	0.409915
0.601276	0.460968	0.832603	0.536205	0.521208	0.883623	0.36006	0.543072
0.32217	0.418392	0.825297	0.438542	0.323831	0.360061	0.388758	0.528695
0.814616	0.638231	0.587817	0.689404	0.770004	0.348008	0.657342	0.364125
0.421706	0.635817	0.334638	0.500791	0.380683	0.579188	0.676838	0.733219
0.625952	0.3792	0.599318	0.519675	0.105172	0.607127	0.637969	0.572849
0.134784	0.608239	0.414199	0.335456	0.876997	0.682029	0.622096	0.532708
0.52902	0.436037	0.536304	0.304271	0.623826	0.7043	0.571576	0.232128
0.815772	0.444463	0.606467	0.843902	0.351368	0.729693	0.396766	0.363831
0.594133	0.639898	0.673828	0.69079	0.396885	0.610124	0.614004	0.493086
0.676641	0.678957	0.667419	0.568323	0.639303	0.804011	0.653355	0.581763
0.663617	0.668173	0.674352	0.67441	0.49065	0.592842	0.37229	0.610177
0.67109	0.632993	0.560433	0.377337	0.383953	0.602511	0.267418	0.600854
0.895601	0.753739	0.799672	0.4554	0.492417	0.701195	0.53805	0.403387
0.738606	0.659935	0.553276	0.408482	0.483835	0.498712	0.323234	0.545582
0.793884	0.859043	0.853521	0.493598	0.437586	0.762615	0.677334	0.414634
0.646022	0.242827	0.486931	0.492491	0.517238	0.859755	0.506671	0.484377
0.677503	0.649312	0.609253	0.61216	0.482297	0.687898	0.476167	0.616887
0.862401	0.783879	0.833176	0.601803		0.875112	0.418649	0.907999
0.634703	0.760814	0.455594	0.359582	0.634896	0.679086	0.30949	0.421935
0.842763	0.398425	0.617097	0.427244	0.652369	0.726272	0.44558	0.473875
0.88543	0.494825	0.672516	0.792673	0.353496	0.629946	0.423347	0.677043
0.795294	0.596539	0.641278	0.555394	0.466136	0.454363	0.42294	0.258505
0.780377	0.374876	0.634036	0.575158	0.558672	0.674229	0.538318	0.713318
0.628247	0.579448	0.449992	0.523588	0.502815	0.815075	0.311548	0.55227
0.878588	0.452066	0.724742	0.735246	0.495589	0.437588	0.466528	0.481072
0.505738	0.800687	0.540155	0.500693	0.385299	0.670384	0.583965	0.486034
0.719193	0.380297	0.6788	0.774997	0.361282	0.672626	0.582413	0.627618
0.702586	0.800897	0.577557	0.51627	0.358651	0.61933	0.62896	0.836303
0.402657	0.752367	0.745194	0.688933	0.508397	0.726305	0.303791	0.377607
0.792311	0.539293	0.449137	0.442312	0.608267	0.686875	0.636547	0.675483
0.783814	0.452309	0.712804	0.521426	0.676428	0.480311	0.618281	0.55369
0.609661	0.642777	0.421332	0.452146	0.499821	0.686203	0.76009	0.763736
0.776756	0.587609	0.510441	0.738676	0.433425	0.692522	0.559042	0.738224
0.583057	0.397343	0.525555	0.615124	0.65871	0.787941	0.531074	0.785397
0.810364	0.739855	0.687777	0.672485	0.370452	0.505527	0.510336	0.686777
0.521776	0.453232	0.493365	0.864968	0.291715	0.47275	0.188891	0.469254
0.62269	0.751339	0.583095	0.791057	0.305715	0.441539	0.49466	0.513286
0.712462	0.401162	0.503267	0.755201	0.542252	0.686036	0.657342	0.6658
0.653651	0.72342	0.418228	0.799252	0.556595	0.641622	0.557216	0.447729
0.669086	0.543467	0.63995	0.695319	0.730682	0.561311	0.770837	0.534544
0.736253	0.537022	0.279437	0.729319	0.59869	0.892106	0.333552	0.535068
0.637568		0.640826	0.276783	0.619978	0.705856	0.523633	0.821269
0.764199	0.461301	0.652424	0.550642	0.30349	0.68155	0.378251	0.646221
0.672649	0.648666	0.600344	0.705627	0.491901	0.584672	0.54309	0.581223
0.827854	0.476811	0.459767	0.82714	0.613169	0.709762	0.643113	0.638184
0.577399	0.447042	0.749449	0.788924	0.537632	0.713581	0.43129	0.45884
0.839018	0.471962	0.331346	0.29239	0.64852	0.571605	0.516741	0.50842
0.674229	0.724482	0.865639	0.49447	0.626979	0.542282	0.618321	0.714651
0.803626	0.428767	0.725775	0.604945	0.3731	0.657698	0.514381	0.587061
0.673253	0.48691	0.524837	0.564696	0.421647	0.672919	0.353737	0.444014
0.633408	0.589459	0.396864	0.508161	0.473383	0.632494	0.444095	0.684052
0.836446	0.468971	0.321448	0.657495	0.31057	0.805728	0.409309	0.470184
0.497035	0.577928	0.468678	0.878894	0.505771	0.570573	0.309201	0.871037
0.785618	0.611062	0.507022	0.233024	0.461643	0.449138	0.562939	0.489533
0.613461	0.616488	0.704552	0.380575	0.338171	0.7671	0.662878	0.750136
0.345602	0.66443	0.694049	0.480518	0.685356	0.5368	0.33511	0.540041
0.836513	0.73766	0.694392	0.352402	0.414066	0.46022	0.414774	0.681721
0.598479	0.651302	0.662419	0.585891	0.498913	0.443234	0.682808	0.572051
0.821399	0.590411	0.632239	0.866772	0.420561	0.558154	0.411056	0.824761
0.546982	0.705051	0.432864	0.731934	0.430048	0.655048	0.576048	0.572257
0.711458	0.601683	0.469419	0.763034	0.40494	0.807739	0.479614	0.578394
0.500457	0.503658	0.534292	0.441471	0.560939	0.786168	0.531642	0.586165
0.473112	0.697347	0.505723	0.137625	0.271944	0.577567	0.404731	0.270079
0.8334	0.493176	0.420287	0.305925	0.496317	0.912733	0.497551	0.735989
0.231679	0.746869	0.38753	0.749431	0.298557	0.589415	0.398678	0.622451
0.400458	0.862126	0.393594	0.741436	0.545974	0.382651	0.459168	0.450125
0.730596	0.468474	0.564072	0.76281	0.601014	0.695178	0.627939	0.597327
0.722865	0.509524	0.507939	0.564593	0.487765	0.460669	0.871466	0.50997
0.680132	0.33644	0.484068	0.773754	0.414365	0.648684	0.535705	0.235033
0.446833	0.589045	0.569628	0.672726	0.366276	0.796511	0.386713	0.53164
0.910459	0.355834	0.619153	0.60909	0.686328	0.159653	0.487077	0.421384
0.743962	0.381046	0.58768	0.419904	0.696823	0.649112	0.365898	0.49054
0.725699	0.442606	0.472447	0.823706	0.526306	0.534517	0.51492	0.707165
0.605899	0.441374	0.397739	0.327308	0.380723	0.473407	0.466579	0.491866
0.636139	0.411227	0.576943	0.407089	0.467134	0.880036	0.475917	0.503168
0.632079	0.561195	0.584187	0.329133	0.527726	0.629902	0.433669	0.373524
0.692182	0.588258	0.588934	0.652747	0.430327	0.399453	0.81018	0.6369
0.730891	0.792267	0.433164	0.35133	0.608291	0.64704	0.758662	0.516182
0.695014	0.563328	0.629399	0.445908	0.331831	0.645151	0.298443	0.636804
0.0938465	0.456638	0.518695	0.860796	0.486639	0.616227	0.499919	0.76394
0.81518	0.583386	0.773648	0.547168	0.503018	0.364871	0.722061	0.739353
0.642225	0.412797	0.279038	0.700961	0.52679	0.63151	0.562668	0.598634
0.846792	0.477052	0.407915	0.411359	0.461657	0.76185	0.592029	0.431869
0.822586	0.491687	0.772184	0.728573	0.674699	0.777983	0.43036	0.91148
0.510825	0.493588	0.487944	0.270042	0.451093	0.365326	0.60533	0.517813
0.707134	0.713745	0.724806	0.52355	0.519558	0.88101	0.580376	0.380355
	0.547763	0.870013	0.449446	0.472789	0.43242	0.464753	0.776405
0.627247	0.780796	0.463528	0.828681	0.482905	0.433501	0.638569	0.77331
0.629927	0.388154	0.165482	0.210347	0.56197	0.799531	0.328784	0.526869
0.687861	0.550042	0.660906	0.692918	0.540946	0.322636	0.624562	0.411253
0.775597	0.387244	0.276691	0.721154	0.561228	0.441638	0.71263	0.40638
0.562558	0.551301	0.637437	0.579001	0.594182	0.449131	0.657759	0.561746
0.650979	0.701967	0.528126	0.507285	0.515475	0.785413	0.617457	0.402911
0.589377	0.451928	0.665541	0.580863	0.505884	0.638097	0.563687	0.549479
0.563084	0.487836	0.41852	0.437326	0.606938	0.819338	0.611423	0.628477
0.7308	0.429714	0.521626	0.403705	0.574135	0.689884	0.578085	0.816269
0.54302	0.657871	0.536201	0.718504	0.399178	0.72109	0.547307	0.652581
0.549531	0.863131	0.583387	0.495292	0.309565	0.848141	0.425113	0.228476
0.570587	0.731015	0.740635	0.610122	0.409649	0.680233	0.545206	0.584627
0.49615	0.549683	0.594245	0.426604	0.647246	0.887436	0.429632	0.379391
0.771849	0.358768	0.833907	0.62711	0.337454	0.559394	0.63058	0.752076
0.505064	0.383689	0.763363	0.729196	0.622756	0.890994	0.413877	0.602818
0.584467	0.734386	0.430591	0.214118	0.529694	0.699741	0.584414	0.527677
0.449612	0.46485	0.651114	0.873388	0.490156	0.762623	0.0905657	0.437644
0.616151	0.504072	0.48745	0.431358	0.43799	0.883885	0.44249	0.837771
0.660573	0.674068	0.682492	0.332018	0.352765	0.52073	0.617798	0.485737
0.560167	0.397143	0.643227	0.496198	0.501862	0.736142	0.651626	0.491095
0.620881	0.670686	0.624517	0.46475	0.651245	0.807423	0.349292	0.549848
0.650144	0.870128	0.719819	0.434498	0.664597	0.890044	0.733618	0.404572
0.571136	0.545082	0.564447	0.695654	0.481158	0.489376	0.390808	0.455439
0.381083	0.480564	0.485706	0.446309	0.399173	0.896253	0.411474	0.25332
0.635265	0.728948	0.848572	0.48171	0.463043	0.462599	0.648911	0.365932
0.402584	0.677905	0.71161	0.740671	0.549728	0.63199	0.309455	0.576936
0.601036	0.679037	0.801708	0.533895	0.332486	0.791889	0.575905	0.81127
0.675057	0.456919	0.843748	0.214349	0.511739	0.76013	0.510529	0.314513
0.627059	0.852115	0.595482	0.508156	0.618409	0.584009	0.437072	0.430625
0.633158	0.7459	0.564068	0.461106	0.284639	0.124406	0.532812	0.394334
0.392082	0.216164	0.606667	0.393673	0.594923	0.592036	0.635063	0.822077
0.731563	0.425073	0.544042	0.601426	0.503731	0.588381	0.426846	0.569933
0.90086	0.44297	0.648938	0.404272	0.565574	0.605445	0.598551	0.275754
0.381692	0.572584	0.827455	0.326339	0.599579	0.677339	0.441941	0.200947
0.654794	0.619066	0.409044	0.493492	0.651134	0.513363	0.598201	0.579398
0.753651	0.613055	0.443047	0.868057	0.492271	0.882376	0.590592	0.101526
0.851833	0.474379	0.592973	0.520722	0.546134	0.521813	0.637826	0.427147
0.6052	0.36602	0.233451	0.645433	0.505573	0.915259	0.424936	0.289235
0.366706	0.70233	0.473372	0.700144	0.642716	0.620933		0.421569
0.857159	0.387184	0.750506	0.508896	0.606569	0.242174	0.103088	0.413524
0.578544	0.495232	0.649969	0.561108	0.424035	0.435376	0.689833	0.331915
0.602445	0.59506	0.405041	0.446673	0.42194	0.784226	0.682975	0.182254
0.534451	0.381094	0.416712	0.527981	0.578096	0.411475	0.619388	0.429158
0.544711	0.751828	0.141106	0.563524	0.466683	0.427155	0.628788	0.496782
0.848044	0.690014	0.744016	0.712167	0.541488	0.480445	0.571838	0.52159
0.563827	0.682266	0.34829	0.940268	0.73015	0.254977	0.617888	0.798797
0.689906	0.625765	0.658713	0.609321	0.392302	0.910963	0.626102	0.344809
0.757263	0.575319	0.476432	0.696414	0.629543	0.70084	0.513615	0.893536
0.819307	0.803358	0.839868	0.597557	0.504352	0.646484	0.755187	0.197834
0.411788	0.602407	0.48259	0.411984	0.590008	0.852192	0.763145	0.259698
0.69327	0.791547	0.482972	0.669703	0.336915	0.666398	0.54015	0.76635
0.518758	0.566723	0.279488	0.511652	0.385939	0.340271	0.578264	0.247333
0.712089	0.509556	0.66718	0.774886	0.526942	0.773604	0.472806	0.537544
0.597241	0.431328	0.497104	0.352255	0.650143	0.844145	0.541273	0.446066
0.787075	0.504347	0.588961	0.654696	0.454435	0.58114	0.478822	0.309817
0.379736	0.615231	0.425604	0.476684	0.429689	0.754218	0.570968	0.641889
0.546433	0.714512	0.612632	0.715433	0.478267	0.454753	0.870284	0.791246
0.706384	0.537303	0.400024	0.623479	0.355728	0.755274	0.715761	0.750248
0.411464	0.819832	0.640644	0.495266	0.452614	0.665215	0.572078	0.57299
0.698836	0.453637	0.463765	0.582073	0.353935	0.441714	0.496255	0.591935
0.388779	0.596609	0.491492	0.739322	0.625226	0.798779	0.565374	0.860642
0.613546	0.543152	0.447988	0.562497	0.592061	0.653534	0.623082	0.4713
0.632379	0.52021	0.820239	0.528928	0.534593	0.867016	0.485285	0.303631
0.342784	0.523449	0.745567	0.688564	0.57544	0.84396	0.65658	0.352984
0.821574	0.425739	0.810465	0.458893	0.523487	0.482307	0.469085	0.856809
0.592817	0.82941	0.453791	0.591882	0.576174	0.898925	0.406992	0.601095
0.554031	0.304682	0.677808	0.842052	0.495093	0.391412	0.570167	0.715319
0.814198	0.736046	0.400455	0.656324	0.39841	0.440053	0.593215	0.801588
0.641456	0.71934	0.577729	0.372263	0.569567	0.516568	0.559696	0.753914
0.789909	0.745971	0.571907	0.607022	0.609177	0.913916	0.368449	0.320294
0.5551	0.585859	0.439138	0.479476	0.537613	0.842842	0.776499	0.593591
0.557677	0.768234	0.404924	0.404979	0.620267	0.364982	0.514775	0.725991
0.51782	0.188448	0.474614	0.634899	0.623498	0.71487	0.268	0.64542
0.681227	0.834594	0.600896	0.787582	0.575379	0.762912	0.459279	0.717436
0.471796	0.71902	0.664002	0.603511	0.427122	0.662783	0.2669	0.550304
0.203307	0.716214	0.488105	0.487059	0.42953	0.51136	0.613199	0.551906
0.412552	0.624428	0.424037	0.521551	0.388276	0.516345	0.579422	0.611207
0.561699	0.425921	0.5302	0.63909	0.578211	0.802904	0.464009	0.632069
0.461074	0.722564	0.526617	0.468051	0.525518	0.330134	0.613588	0.501825
0.486591	0.710755	0.849493	0.525686	0.406118	0.704892	0.569336	0.627775
0.420056	0.555118	0.542342	0.731562	0.504308	0.669785	0.750808	0.404261
0.603215	0.323298	0.800133	0.408226	0.565183	0.682881	0.563314	0.41097
0.594533	0.79258	0.638814	0.861182	0.558605	0.512444	0.439532	0.57057
0.877962	0.522141	0.566616	0.765895	0.331753	0.818976	0.557271	0.877704
0.533983	0.58672	0.871644	0.652301	0.589393	0.740131	0.44187	0.505961
0.410449	0.528284	0.347522	0.822756	0.439844	0.565191	0.566459	0.61471
0.828176	0.794641	0.494209	0.544556	0.572915	0.647446	0.740553	0.542461
0.73832	0.504541	0.599412	0.284741	0.589444	0.576946	0.492207	0.607493
0.462865	0.423498	0.620417	0.581855	0.330098	0.803831	0.566084	0.303518
0.402923	0.332004	0.681951	0.463315	0.474978	0.809629	0.550018	0.414372
0.523877	0.654058	0.535338	0.563452	0.651578	0.394164	0.43852	0.500435
0.749789	0.631419	0.815623	0.470274	0.333712	0.610734	0.442359	0.359226
0.26789	0.597263	0.343827	0.699505	0.459008	0.464342	0.407505	0.360823
0.820404	0.781975	0.472726	0.528013	0.559505	0.609586	0.699933	0.586451
0.561128	0.529614	0.709595	0.67879	0.437151	0.666874	0.559448	0.345044
0.684618	0.548931	0.701429	0.552192	0.56636	0.668535	0.415013	0.854859
0.604387	0.625054	0.509697	0.449762	0.388872	0.510804	0.650095	0.645981
0.550461	0.636556	0.915022	0.629971	0.52607	0.520361	0.564445	0.426767
0.769509	0.507503	0.678719	0.442081	0.39296	0.825712	0.625567	0.555474
0.544652	0.886192	0.700476	0.541892	0.389084	0.589594	0.512893	0.551872
0.656283	0.701103	0.654437	0.558072	0.493926	0.58419	0.744148	0.29905
0.750406	0.561333	0.511364	0.673107	0.483296	0.655056	0.42966	0.613137
0.639371	0.526226	0.518562	0.606334	0.442139	0.823956	0.615565	0.780113
0.56817	0.617349	0.684006	0.371467	0.528515	0.598232	0.796976	0.36765
0.589146	0.65278	0.708081	0.459645	0.452734	0.854309	0.780988	0.337944
0.167716	0.676583	0.720586	0.496789	0.505235	0.584146	0.282781	0.568729
0.794102	0.783396	0.369242	0.562644	0.503667	0.649406	0.263657	0.446124
0.559061	0.429104	0.582223	0.780732	0.341226	0.553511	0.558201	0.613685
0.372244	0.356782	0.424313	0.473051	0.617681	0.593972	0.659389	0.669608
0.533469	0.365889	0.569546	0.579758	0.618971	0.610316	0.520645	0.687689
0.538564	0.702981	0.730584	0.380161	0.519042	0.656801	0.516222	0.672254
0.624564	0.596313	0.699104	0.644051	0.59084	0.71214	0.552581	0.472049
0.458447	0.444421	0.470987	0.641864	0.550168	0.655256	0.367558	0.185693
0.453044	0.609466	0.827467	0.776356	0.410429	0.569472	0.406067	0.114707
0.711668	0.763991	0.743874	0.500541	0.662485	0.635947	0.524551	0.458399
0.50346	0.47422	0.667474	0.524732	0.56892	0.316423	0.548126	0.139709
0.296194	0.685959	0.532123	0.12493	0.44225	0.669445	0.759533	0.38738
0.469789	0.498865	0.633963	0.58872	0.449983	0.605257	0.627061	0.392336
0.904275	0.78586	0.377817	0.844441	0.379619	0.128301	0.764551	0.409016
0.56251	0.637768	0.683835		0.450713	0.526034	0.639026	0.538965
0.398392	0.737544	0.742454	0.0974736	0.489781	0.374502	0.503141	0.769953
0.688076	0.702826	0.606737	0.624728	0.472154	0.636771	0.485425	0.387794
0.675296	0.375871	0.435039	0.416594	0.539617	0.587437	0.609541	0.701881
0.520239	0.653065	0.668288	0.697149	0.401015	0.66941	0.521581
0.57843	0.585565	0.614147	0.545041	0.569451	0.748602	0.419854	0.120184
0.895195	0.719748	0.763936	0.682311	0.568566	0.305629	0.808426	0.085305
0.836132	0.522073	0.708694	0.767836	0.443391	0.487651	0.716568	0.564684
0.858105	0.344895	0.719129	0.642872	0.67119	0.597352	0.552	0.606532
0.699036	0.578865	0.584532	0.712679	0.480358	0.64717	0.393982	0.409473
0.326955	0.131213	0.529911	0.845643	0.653747	0.31726	0.420095	0.522817
0.685058	0.388834	0.477085	0.511392	0.338574	0.656071	0.474453	0.839286
0.52369	0.40843	0.562875	0.798005	0.380054	0.527966	0.69669	0.413369
0.621107	0.4901	0.644391	0.692966	0.769764	0.366584	0.603195	0.544977
0.780616	0.559919	0.628063	0.787299	0.668132	0.759713	0.408287	0.646581
0.547585	0.556204	0.736504	0.713884	0.434477	0.5649	0.7132	0.463554
0.79071	0.503045	0.616562	0.43985	0.477957	0.558376	0.475227	0.622519
0.692367	0.73121	0.684938	0.659663	0.577177	0.61801	0.886591	0.390481
0.41426	0.219178	0.864002	0.708232	0.779086	0.372119	0.42173	0.791229
0.703572	0.892399	0.809662	0.528683	0.515694	0.526016	0.665262	0.382651
0.73828	0.371842	0.294025	0.468408	0.726073	0.522471	0.569861	0.702028
0.652971	0.29699	0.817269	0.687155	0.37522	0.460147	0.546792	0.517139
0.679067	0.561044	0.417658	0.623161	0.294548	0.510672	0.630532	0.542
0.598625	0.538144	0.624236	0.517591	0.551761	0.533765	0.46391	0.504238
0.81019	0.7006	0.752302	0.391756	0.586607	0.255667	0.696999	0.620307
0.90685	0.817034	0.585617	0.55867	0.511334	0.432343	0.468465	0.372107
0.28083	0.786462	0.822672	0.665073	0.435589	0.651451	0.621333	0.288313
0.866463	0.534755	0.650436	0.860825	0.495075	0.371017	0.580502	0.420535
0.678783	0.612543	0.720285	0.314902	0.611255	0.439999	0.444651	0.680572
0.774779	0.755988	0.762544	0.587443	0.523022	0.662302	0.581262	0.366002
0.545647	0.430807	0.824058	0.690965	0.622785	0.8133	0.688281	0.713204
0.556589	0.315669	0.549018	0.783248	0.562416	0.665183	0.340686	0.478388
0.654689	0.638498	0.519763	0.551098	0.517523	0.378127	0.642833	0.397362
0.595994	0.688078	0.429904	0.710535	0.500327	0.492107	0.696274	0.338313
0.600297	0.562535	0.799949	0.669529	0.425665	0.569201	0.471604	0.316607
0.662579	0.582001	0.582134	0.539538	0.322919	0.794459	0.56025	0.286241
0.423683	0.795897	0.397837	0.66558	0.434756	0.416902	0.707434	0.301792
0.118904	0.311763	0.846403	0.714854	0.482497	0.422192	0.496987	0.464347
0.426328	0.235011	0.841815	0.600592	0.444771	0.540083	0.667542	0.489011
0.459998	0.490547	0.349107	0.3713	0.437812	0.731085	0.458565	0.386326
0.6772	0.423332	0.451431	0.712323	0.473752	0.550562	0.603043	0.253138
0.348499	0.481139	0.864002	0.425931	0.321884	0.452992	0.53322	0.381217
0.714261	0.598297	0.67469	0.540305	0.495375	0.433287	0.395035	0.453304
0.582292	0.721186	0.618668	0.722347	0.457778	0.524057	0.411329	0.587388
0.582697	0.66285	0.474402	0.527095	0.438613	0.123403	0.608222	0.841995
0.628292	0.476676	0.507164	0.737597	0.555089	0.634871	0.3882	0.394354
0.562173	0.395943	0.23454	0.268433	0.553037	0.629518	0.59279	0.656878
0.543705	0.680698	0.608356	0.710958	0.445282	0.600989	0.351143	0.618103
0.529594	0.42014	0.467853	0.723892	0.538149	0.835543	0.606613	0.329996
0.632095	0.66333	0.626757	0.702057	0.407142	0.409628	0.478141	0.679437
0.56964	0.667838	0.813094	0.837527	0.375373	0.673157	0.65438	0.477404
0.757231	0.817631	0.354873	0.749565	0.526148	0.661988	0.421046	0.353403
0.775286	0.56137	0.491031	0.658143	0.333425	0.565324	0.70841	0.397988
0.840136	0.786122	0.854024	0.756107	0.545941	0.458917	0.548056	0.408119
0.613706	0.75976	0.707608	0.440746	0.510807	0.382327	0.573558	0.425892
0.715976	0.277209	0.70346	0.697931	0.53756	0.771086	0.125971	0.486315
0.474271	0.766546	0.810815	0.636884	0.233934	0.716507	0.119868	0.321834
0.632858	0.575566	0.609524	0.383575	0.396771	0.722472	0.789588	0.441353
0.550594	0.769633	0.692238	0.832027	0.517994	0.78589	0.493965	0.240107
0.783584	0.586217	0.789148	0.683742	0.536504	0.77419	0.50951	0.592614
0.855301	0.744243	0.594766	0.575531	0.367203	0.638213	0.776913	0.475721
0.535381	0.559879	0.385876	0.751239	0.36665	0.517109	0.759275	0.393355
0.677317	0.481591	0.359506	0.8031	0.675636	0.585683	0.437397	0.676532
0.314589	0.689484	0.875422	0.456529	0.372891	0.616866	0.653279	0.358684
0.607914	0.718983	0.475147	0.749737	0.769675	0.51291	0.322967	0.849466
0.609608	0.491651	0.72754	0.495755	0.337853	0.680793	0.521724	0.44128
0.367894	0.566056	0.775269	0.873691	0.746918	0.638074	0.207796	0.440066
0.582192	0.717329	0.790249	0.7382	0.434373	0.748127	0.504824	0.570822
0.470104	0.523312	0.759457	0.313951	0.530936	0.534124	0.477677	0.46226
0.70111	0.86721	0.444549	0.757748	0.527975	0.661947	0.361149	0.554433
0.68987	0.478376	0.602212	0.651893	0.388815	0.88453	0.524311	0.339963
0.732261	0.901769	0.430193	0.549951	0.666225	0.695932	0.514347	0.472059
0.538634	0.782715	0.42021	0.507547	0.413988	0.7654	0.459305	0.387612
0.642092	0.375494	0.500943	0.657373	0.608828	0.61499	0.439049	0.418436
0.681616	0.400854	0.845533	0.6041	0.592883	0.608344	0.325785	0.295669
0.489452	0.548609	0.140013	0.594049	0.594199	0.547965	0.328885	0.365791
	0.29715	0.805171	0.733687	0.327658	0.657959	0.641411	0.411528
0.83804	0.542774	0.867089	0.427164	0.473634	0.634088	0.200931	0.480283
0.696092	0.573916	0.487337	0.775177	0.423199	0.599546		0.494332
0.797857	0.306441	0.459156	0.566182	0.594966	0.86812	0.0749493	0.417233
0.756847	0.538031	0.220219	0.600984	0.564878	0.786196	0.434867	0.536006
0.589321	0.4264	0.828162	0.536498	0.539988	0.477655	0.369704	0.384583
0.698754	0.574146	0.82485	0.792313	0.559042	0.77106	0.524617	0.438585
0.673354	0.645933	0.673514	0.719944	0.762182	0.585393	0.496165	0.368594
0.738339	0.83606	0.51582	0.912198	0.532839	0.481789	0.392085	0.752412
0.898443	0.535908	0.67375	0.554411	0.509212	0.58145	0.511571	0.446094
0.553151	0.343683	0.24314	0.49308	0.541801	0.590038	0.47219	0.413768
0.649435	0.148263	0.551745	0.722501	0.369638	0.59902	0.357112	0.818359
0.769568	0.590896	0.405983	0.270448	0.494795	0.718759	0.469309	0.842651
0.905446	0.451081	0.616679	0.439622	0.458243	0.686107	0.507407	0.24537
0.754136	0.911096	0.846778	0.804625	0.469838	0.826596	0.528377	0.770752
0.862442	0.31989	0.836848	0.285032	0.336883	0.661199	0.506314	0.625595
0.647549	0.675518	0.784334	0.623792	0.539145	0.51569	0.594281	0.627373
0.562908	0.449828	0.427364	0.631415	0.637791	0.368697	0.311868	0.472126
0.799027	0.420627	0.866171	0.789642	0.561218	0.628811	0.563939	0.750885
0.702179	0.791782	0.281151	0.765636	0.675232	0.731347	0.403062	0.590826
0.493437	0.502238	0.533534	0.611722	0.438241	0.598046	0.354369	0.504581
0.75919	0.548037	0.722514	0.701198	0.302372	0.686089	0.502606	0.44107
0.849532	0.500736	0.638914	0.331603	0.677215	0.650965	0.481241	0.785613
0.791574	0.63412	0.809083	0.409835	0.636484	0.782521	0.515831	0.881945
0.495065	0.858268	0.538346	0.618653	0.476729	0.560415	0.415217	0.424857
0.77998	0.650308	0.605766	0.636827	0.448549	0.689328	0.399827	0.294693
0.758131	0.657527	0.390527	0.396273	0.593276	0.321938	0.752951	0.514231
0.573369	0.726382	0.769547	0.491356	0.463184	0.629985	0.326408	0.298134
0.784985	0.851358	0.843187	0.519825	0.529105	0.773801	0.409216	0.597392
0.878289	0.635532	0.449489	0.734129	0.462935	0.375688	0.554588	0.875671
0.891462	0.274658	0.756428	0.893637	0.397548	0.497285	0.522933	0.579666
0.829847	0.85339		0.47587	0.466178	0.795381	0.508083	0.573255
0.797239	0.393382	0.0956047	0.291918	0.542801	0.576671	0.416344	0.88276
0.812571	0.704942	0.428312	0.576953	0.477181	0.776603	0.470429	0.644436
0.541408	0.688862	0.685285	0.693467	0.660717	0.888544	0.390076	0.649924
0.819531	0.436894	0.485633	0.703	0.622564	0.685398	0.383672	0.765826
0.849817	0.598497	0.57855	0.296971	0.605988	0.575404	0.508917	0.880932
0.928371	0.707432	0.651439	0.713857	0.613684	0.712739	0.534416	0.422719
0.408371	0.456333	0.654352	0.529617	0.59931	0.69978	0.841938	0.523941
0.783751	0.55071	0.59165	0.720558	0.569936	0.80973	0.363202	0.82586
0.734503	0.509842	0.539116	0.543105	0.408387	0.585224	0.417263	0.723459
0.726117	0.805272	0.400572	0.595442	0.601008	0.709828	0.533911	0.819563
0.836022	0.592685	0.68857	0.590856	0.675446	0.800801	0.469457	0.881531
0.923917	0.31484	0.696952	0.373022	0.546579	0.713395	0.429532	0.904827
0.432906	0.703237	0.610661	0.899463	0.393235	0.784177	0.564982	0.784917
0.488143	0.361092	0.493563	0.737211	0.424862	0.834464	0.530859	0.48093
0.467209	0.753946	0.565524	0.416766	0.640263	0.830886	0.492057	0.502699
0.503538	0.743272	0.490526	0.824527	0.567497	0.798371	0.39479	0.526551
0.753536	0.328291	0.332648	0.722996	0.559197	0.827867	0.598871	0.693244
0.554624	0.398251	0.67693	0.777106	0.514154	0.605644	0.368109	0.423386
0.536147	0.728441	0.417045	0.789811	0.455075	0.859447	0.459227	0.502883
0.656893	0.685657	0.707328	0.607821	0.661967	0.646275	0.480577	0.432873
0.483085	0.687766	0.650299	0.244024	0.397797	0.804608	0.487125	0.563165
0.746212	0.165328	0.591969	0.523702	0.380583	0.574265	0.210465	0.554067
0.535371	0.674947	0.397	0.484996	0.56291	0.652939	0.316532	0.47573
0.42051	0.442137	0.684927	0.36321	0.610009	0.730636	0.405262	0.457736
0.13738	0.593774	0.586931	0.427936	0.520775	0.590786	0.402914	0.344245
0.811471	0.494005	0.464037	0.197634	0.23634	0.358323	0.51544	0.720296
0.735702	0.51236	0.465655	0.512587	0.348474	0.780876	0.392105	0.236428
0.467015	0.494917	0.558752	0.35634	0.38013	0.512482	0.500077	0.590992
0.642937	0.662345	0.49345	0.734284	0.487376	0.477266	0.59615	0.816963
0.598126	0.507397	0.496465	0.541434	0.4302	0.427987	0.453147	0.862786
0.491773	0.629967	0.617942	0.454568	0.618382	0.451988	0.633552	0.52795
0.370678	0.501659	0.700141	0.58305	0.613241	0.355826	0.424501	0.517295
0.71068	0.611871	0.438494	0.470301	0.506204	0.748606	0.570891	0.107105
0.654042	0.550593	0.204214	0.780643	0.475221	0.753276	0.507439	0.396288
0.553387	0.409373	0.504359	0.190906	0.562073	0.705803	0.481847	0.691005
0.503889	0.722389	0.645045	0.467644	0.433736	0.671074	0.58336	0.867228
0.570394	0.524189	0.398981	0.366532	0.506316	0.520054	0.539386	0.24309
0.764556	0.555137	0.458343	0.519249	0.5141	0.650559	0.461998	0.766092
0.697105	0.440083	0.757224	0.482864	0.574839	0.49733	0.452894	0.621352
0.506128	0.337063	0.50209	0.326164	0.720148	0.643888	0.36994	0.601039
0.668324	0.917499	0.226603	0.47553	0.560019	0.527381	0.481624
0.21054	0.673386	0.364468	0.704843	0.381945	0.793708	0.627421	0.122416
0.770981	0.817687	0.395607	0.821317	0.509922	0.502485	0.519632	0.405874
0.564608	0.856773	0.681187	0.640765	0.600246	0.586989	0.547235	0.354656
0.511543	0.496991	0.45183	0.339535	0.366515	0.392137	0.290017	0.335892
0.415771	0.76385	0.505587	0.358154	0.499297	0.491414	0.472901	0.742649
0.707652	0.61877	0.486527	0.453302	0.67283	0.630164	0.422537	0.458394
0.860395	0.502258	0.387211	0.425286	0.561731	0.747018	0.373672	0.857777
0.859373	0.504575	0.595112	0.341865	0.308501	0.843503	0.37065	0.59418
	0.707231	0.60408	0.776656	0.504781	0.760589	0.493023	0.590414
0.614222	0.595047	0.444738	0.153566	0.687895	0.423209	0.57802	0.387113
0.508392	0.435295	0.484733	0.573039	0.644496	0.649164	0.479141	0.857551
0.460099	0.527589	0.526779	0.694915	0.558884	0.855639	0.379731	0.48953
0.45099	0.826276	0.58725	0.653118	0.543967	0.727	0.424601	0.552644
0.582039	0.338929	0.57418	0.295699	0.707439	0.711657	0.539641	0.621874
0.573132	0.398128	0.663973	0.720324	0.382476	0.490297	0.275341	0.592764
0.49621	0.412755	0.403966	0.526788	0.565383	0.785679	0.518141	0.637682
0.505174	0.755439	0.290168	0.48696	0.639518	0.843469	0.360595	0.904582
0.58	0.706183	0.255557	0.710379	0.681983	0.565292	0.450084	0.576065
0.460615	0.41255	0.462474	0.833098	0.622953	0.784884	0.393439	0.554343
0.495976	0.47237	0.478158	0.799988	0.431258	0.634382	0.448962	0.236079
0.447062	0.621562	0.372879	0.513365	0.647239	0.795904	0.416868	0.583804
0.522555	0.661412	0.396541	0.693676	0.62194	0.628707	0.660239	0.744872
0.563642	0.554688	0.545792	0.655597	0.676913	0.57999	0.501594	0.221455
0.879528	0.904947	0.474754	0.712945	0.619417	0.731611	0.620922	0.730842
0.532052	0.461035	0.382368	0.626003	0.664045	0.543257	0.600875	0.557624
0.556526	0.355983	0.442846	0.861782	0.615885	0.603666	0.420898	0.417422
0.558213	0.541841	0.620929	0.614034	0.510184	0.562912	0.492275	0.545455
0.592524	0.870696	0.418284	0.772749	0.688668	0.393545	0.419416	0.720439
0.644551	0.454371	0.551149	0.470747	0.606094	0.695781	0.51796	0.781325
0.465496	0.570389	0.507796	0.640386	0.422849	0.771146	0.619308	0.417339
0.349308	0.328454	0.632402	0.509489	0.699199	0.672837	0.590908	0.376856
0.322555	0.33937	0.338501	0.70684	0.554809	0.606453	0.367163	0.680445
0.570707	0.559947	0.566672	0.654433	0.62412	0.748174	0.56969	0.764311
0.513243	0.590599	0.481454	0.541198	0.425443	0.685834	0.584522	0.428003
0.437275	0.587122	0.406051	0.739295	0.524524	0.778116	0.458912	0.754344
0.52297	0.530504	0.580345	0.62412	0.526571	0.606115	0.316365	0.704805
0.447857	0.713862	0.597042	0.596752	0.513481	0.857596	0.580905	0.733655
0.488202	0.549357	0.46693	0.285714	0.657372	0.600312	0.582483	0.628422
0.749592	0.558025	0.488006	0.315163	0.566829	0.644769	0.624182	0.563461
0.633622	0.625988	0.612906	0.476647	0.397521	0.584379	0.558022	0.35775
0.357957	0.561972	0.441771	0.407899	0.677555	0.55396	0.413628	0.717758
0.507685	0.625255	0.491934	0.551514	0.631678	0.437857	0.350364	0.846673
0.436395	0.577864	0.557459	0.912747	0.516022	0.797409	0.222918	0.535393
0.598199	0.597806	0.297762	0.796296	0.430666	0.712112	0.482138	0.844571
0.432337	0.947014	0.593741	0.385889	0.492843	0.501277	0.44558	0.364558
0.697828	0.460964	0.552293	0.573098	0.491522	0.690055	0.509744	0.62151
0.494436	0.707454	0.394613	0.66155	0.693044	0.350702	0.28484	0.607185
0.599356	0.524953	0.421371	0.614165	0.335103	0.624565	0.527364	0.800228
0.449654	0.474223	0.360126	0.711213	0.582643	0.617878	0.466952	0.413016
0.693093	0.746451	0.560805	0.631298	0.285578	0.792114	0.466657	0.618574
0.572233	0.675573	0.548677	0.356384	0.735951	0.827659	0.396686	0.124743
0.319476	0.583644		0.574273	0.657353	0.720003	0.510341	0.702406
0.713778	0.485161	0.0967079	0.297854	0.558921	0.662572	0.551781	0.642091
0.458887	0.610441	0.455303	0.77753	0.508307	0.790131	0.356471	0.564006
0.432714	0.718748	0.472555	0.698493	0.508835	0.757193	0.553659	0.699763
0.777163	0.494033	0.477502	0.718353	0.575959	0.753996	0.555674	0.331877
0.390897	0.771615	0.396095		0.539971	0.526954	0.57825	0.493337
0.44887	0.361991	0.48604	0.0743603	0.511634	0.740538	0.410582	0.667839
0.396942	0.72908	0.608736	0.73973	0.597924	0.667675	0.590772	0.718031
0.467704	0.734377	0.551518	0.789602	0.508051	0.620105	0.553137	0.625418
0.457443	0.390217	0.519526	0.612092	0.209391	0.420359	0.307521	0.6491
0.457298	0.650864	0.340081	0.857279	0.556856	0.612141	0.253927	0.707486
0.479527	0.477255	0.459451	0.825298	0.516816	0.457081	0.572327	0.651128
0.379252	0.413897	0.573011	0.542463	0.622601	0.570316	0.403947	0.586967
0.495988	0.892245	0.268884	0.833818	0.23603	0.7344	0.347043	0.820191
0.454384	0.376748	0.466802	0.747174	0.742318	0.498373	0.626431	0.485862
0.456016	0.625791	0.516969	0.71858	0.520327	0.491366	0.688776	0.675918
0.75787	0.478836	0.578634	0.867109	0.357661	0.840312	0.556228	0.857139
0.460084	0.885266	0.548665	0.372805	0.571351	0.442666	0.523431	0.811839
0.376585	0.711911	0.584113	0.650692	0.302833	0.662883	0.516847	0.67725
0.773621	0.892027	0.358525	0.750904	0.55285	0.695825	0.801019	0.718713
0.569166	0.351868	0.863795	0.409225	0.355665	0.322601	0.587058	0.64462
0.507499	0.798648	0.520558	0.786704	0.223012	0.513821	0.33163	0.730929
0.683284	0.778457	0.501847	0.776099	0.473267	0.563727	0.783969	0.707985
0.426559	0.219712	0.563852	0.420108	0.262503	0.719185	0.460454	0.499398
0.646594	0.490009	0.470629	0.552472	0.462363	0.478778	0.594311	0.765517
0.812326	0.734674	0.58558	0.447033	0.36726	0.54712	0.409642
0.510549	0.377802	0.827451	0.492964	0.477574	0.490612	0.326431	0.563099
0.679029	0.506193	0.420002	0.681813	0.460093	0.570363	0.567981	0.395066
0.340011	0.750358	0.551985	0.662193	0.513921	0.581046	0.493312	0.327075
0.565763	0.692413	0.543276	0.530266	0.599413	0.829481	0.854598	0.718367
0.379617	0.820525	0.705204	0.6614	0.332828	0.551608	0.556801	0.271049
0.851973	0.681951	0.457123	0.593531	0.54164	0.569714	0.700649	0.666403
0.705518	0.497732	0.342048	0.634403	0.395801	0.415316	0.348923	0.601596
0.500184	0.699404	0.510395	0.620104	0.438736	0.459777	0.590449	0.593377
0.520089	0.342421	0.426097	0.804025	0.401108	0.54415	0.438942	0.509767
0.596074	0.863166	0.620511	0.777875	0.616289	0.738485	0.713402	0.634977
0.5725	0.501768	0.349989	0.556254	0.627238	0.668922	0.577481	0.512311
0.478197	0.815716	0.684739	0.426802	0.36757	0.6991	0.662721	0.603033
0.504236	0.768531	0.588621	0.801447	0.608829	0.569731	0.406038	0.658134
0.757701	0.522668	0.347082	0.676341	0.667289	0.52519	0.429582	0.66321
0.158125	0.564519	0.480769	0.865589	0.460893	0.609789	0.437281	0.627197
0.706839	0.829225	0.433109	0.704615	0.617796	0.430175	0.394596	0.534228
0.411145	0.539066	0.45298	0.56469	0.333935	0.614288	0.484446	0.431062
0.445063	0.866132	0.326504	0.5434	0.585087	0.287074	0.539335	0.553949
0.680157	0.66443	0.785734	0.593352	0.546478	0.609456	0.353106	0.486479
0.503552	0.722339	0.484758	0.571	0.417999	0.507746	0.280485	0.539485
0.624901	0.418602	0.548232	0.349839	0.693936	0.44536	0.601121	0.324868
0.457081	0.859847	0.551995	0.565897	0.360775	0.435948	0.343283	0.45169
0.612207	0.301	0.470275	0.470596	0.253001	0.355971	0.581122	0.26901
0.392831	0.373543	0.33759	0.342845	0.612075	0.494892	0.496222	0.615949
0.456093	0.70698	0.846162	0.856464	0.342867	0.102489	0.498483	0.573309
0.603038	0.742897	0.370949	0.637886	0.551823	0.698678	0.278615	0.458599
0.742029	0.116302	0.597125	0.618099	0.615729	0.488885	0.570109	0.678816
0.593053	0.415345	0.649185	0.891496	0.335665	0.471474	0.294576	0.510317
0.49348	0.751175	0.632331	0.312158	0.52422	0.746524	0.300421	0.529611
0.603012	0.619046	0.630029	0.357915	0.689666	0.608997	0.54982	0.39663
0.449063	0.112085	0.589411	0.78319	0.625245		0.61218	0.876893
0.330898	0.420078	0.33253	0.85689	0.460816		0.618499	0.642966
0.617937	0.672148	0.531873	0.930965	0.468136	0.101746	0.603529	0.514302
0.528368	0.540699	0.198098	0.730311	0.654075	0.544377	0.641448	0.753796
0.900457	0.73639	0.735753	0.556634	0.668892	0.575557	0.441235	0.181553
0.575294	0.778526	0.709762	0.363074	0.453604	0.589344	0.662685	0.607916
0.811911	0.722915	0.703659	0.757222	0.649547	0.507842	0.502802	0.796778
0.552128	0.736529	0.857784	0.437884	0.725789	0.57378	0.576534	0.558255
0.691656	0.611853	0.568951	0.510045	0.481773	0.411863	0.531746	0.625547
0.676301	0.393091	0.689587	0.640191	0.313377	0.549669	0.350113	0.700184
0.876623	0.284744	0.742167	0.424458	0.43876	0.682612	0.601571	0.317134
0.471439	0.500112	0.793412	0.58064	0.07956	0.384197	0.47788	0.222776
0.604672	0.421246	0.470494	0.581214	0.527147	0.379413	0.282281	0.855181
0.84686	0.679818	0.438911	0.564417	0.421478	0.803113	0.562499	0.269502
0.382159	0.70945	0.669888	0.864344	0.637065	0.330766	0.676275	0.692332
0.707836	0.661606	0.673772	0.537967	0.447328	0.497772	0.440601	0.42657
0.585134	0.793254	0.456455	0.176032	0.72433	0.787076	0.651673	0.366252
0.490162	0.818472	0.626568	0.449049	0.584781	0.731789	0.769591	0.782826
0.746264	0.629287	0.374532	0.663835	0.469191	0.411242	0.29478	0.634096
0.759489	0.78196	0.880667	0.351113	0.540774	0.572318	0.386283	0.436288
0.396731	0.785089	0.613316	0.555511	0.563375	0.451183	0.519822	0.929074
0.667352	0.712915	0.428938	0.468501	0.589597	0.579649	0.499481	0.616189
0.464879	0.722917	0.565641	0.509013	0.560406	0.299971	0.385329	0.576934
0.391979	0.893027	0.397516	0.595094	0.468254	0.426656	0.421068	0.563017
0.660202	0.517151	0.57951	0.455004	0.630287	0.480684	0.318322	0.519901
0.848299	0.64697	0.590701		0.438305	0.328722	0.191274	0.451842
0.497643	0.407578	0.561988	0.563451	0.313398	0.620593	0.623335	0.652493
0.56958	0.364607	0.517874	0.496207	0.59287	0.503548	0.453307	0.687835
0.727359	0.45483	0.300516	0.689319	0.542921	0.597098	0.471809	0.472347
0.471722	0.600109	0.578348	0.377371	0.351275	0.598626	0.444766	0.730686
0.725177	0.518346	0.491891	0.636976	0.494974	0.641311	0.446288	0.708027
0.536093	0.73313	0.562835	0.442065	0.545373	0.803818	0.492214	0.487299
0.519322	0.855047	0.543409	0.544827	0.648013	0.652909	0.412123	0.833309
0.81514	0.680279	0.620929	0.585886	0.688726	0.575475	0.616494	0.721798
0.664183	0.770545	0.447485	0.499567	0.41727	0.54284	0.62237	0.479874
0.866788	0.580299	0.645704	0.740824	0.438448	0.477823	0.376407	0.785394
0.83239	0.748455	0.655287	0.668395	0.591526	0.714675	0.776656	0.780554
0.683844	0.849894	0.764912	0.589786	0.367414	0.486796	0.624185	0.618693
0.472082	0.766641	0.659416	0.55536	0.502071	0.379338	0.661269	0.576202
0.7059	0.825619	0.539542	0.557662	0.26622	0.477904	0.596555	0.711726
0.802884	0.593209	0.419185	0.426457	0.476432	0.255686	0.463328	0.806205
0.784566	0.851093	0.663917	0.433323	0.526302	0.29399	0.461424	0.711316
0.57775	0.718817	0.467446	0.492459	0.394791	0.592592	0.70764	0.421985
0.376062	0.688141	0.632499	0.312301	0.465802	0.576683	0.244369	0.50435
0.478585	0.483846	0.541301	0.536854		0.648552	0.53464	0.513817
0.577328	0.833723	0.442744	0.63369	0.457506	0.342214	0.484706	0.543303
0.653277	0.746573	0.188535	0.465649	0.404935	0.727892	0.592042	0.478004
0.593779	0.646697	0.369695	0.512712	0.646476	0.411255	0.727775	0.58664
0.796327	0.868339	0.302475	0.459899	0.692278	0.643213	0.513533	0.879521
0.425024	0.557147	0.336415	0.458751	0.636733	0.48074	0.308838	0.626976
0.742852	0.828968	0.197802	0.430593	0.773678	0.379855	0.625895	0.750385
0.828711	0.852198		0.582861	0.46515	0.445462	0.719384	0.475016
0.559126	0.504338	0.611281	0.618987	0.595482	0.492694	0.464421	0.441085
0.832284	0.56573	0.77378	0.379406	0.552533	0.63149	0.449224	0.524293
0.691099	0.563843	0.591114	0.67444	0.402441	0.739314	0.45341	0.361273
0.639793	0.776434	0.600956	0.387078	0.568288	0.519966	0.572562	0.750892
0.343151	0.499216	0.370582	0.507173	0.494701	0.659583	0.315486	0.390423
0.722276	0.464762	0.368026	0.3883	0.557532	0.489998	0.557283	0.606703
0.542528	0.807499	0.837304	0.442074	0.602509	0.254402	0.27826	0.528435
0.486419	0.793801	0.46803	0.143505	0.403369	0.337152	0.553396	0.769744
0.709447	0.909709	0.604594	0.177391	0.357547	0.757996	0.530557	0.636432
0.539079	0.703281	0.417074	0.400014	0.41357	0.655291	0.586147	0.466418
0.477564	0.663445	0.415998	0.474911	0.354668	0.318849	0.629743	0.454811
0.436651	0.744571	0.545686	0.329593	0.627524	0.49271	0.501845	0.549785
0.649418	0.633841	0.485233	0.429319	0.583199	0.696814	0.549061	0.3535
0.572085	0.604946	0.473147	0.59307	0.454924	0.565799	0.650807	0.533844
0.566332	0.332286	0.779497	0.43619	0.480984	0.62313	0.511089	0.332188
0.439391	0.532541	0.463376	0.359059	0.540467	0.641468	0.457278	0.873151
0.526992	0.910361	0.415403	0.762715	0.410412	0.407386	0.33579	0.435156
0.749326	0.597528	0.402373	0.800467	0.624644	0.414265	0.57358	0.118439
0.905828	0.379349	0.478746	0.408604	0.687498	0.25324	0.717276	0.298801
0.433912	0.443929	0.729533	0.756953	0.467844	0.455454	0.884237	0.3936
0.878043	0.587227	0.396754	0.636947	0.565069	0.467046	0.449258	0.884648
0.784955	0.407517	0.553759	0.779806	0.565678	0.617657	0.586553	0.358456
0.493938	0.695862	0.54712	0.660267	0.361178	0.570194	0.508503	0.362789
0.7425	0.663774	0.383302	0.341286	0.431856	0.472991	0.514619	0.349213
0.448176	0.554005	0.440249	0.676759	0.547286	0.416066	0.58201	0.536784
0.636459	0.824635	0.34536	0.588104	0.572572	0.674859		0.488685
0.630306	0.738494	0.374677	0.525808	0.575671	0.800699	0.416742	0.350724
0.72701	0.49747	0.524211	0.617882	0.494623	0.727867	0.411596	0.254293
0.858057	0.575997	0.583412	0.615065	0.551321	0.639245	0.50783	0.635958
0.503239	0.847733	0.579184	0.657811	0.594289	0.377648	0.459692	0.581708
0.827884	0.780638	0.526309	0.714753	0.634505	0.406724	0.442263	0.417432
0.687496	0.505923	0.367146	0.480502	0.597926	0.805438	0.517842	0.444941
0.414544	0.736045	0.605689	0.400949	0.550949	0.360008	0.334361	0.379587
0.543149	0.4204	0.500874	0.813423	0.44367	0.420173	0.515707	0.678786
0.333627	0.779326	0.428727	0.713806	0.569199	0.707028	0.486798	0.579499
0.723106	0.822641	0.571241	0.705429	0.584616	0.448922	0.395584	0.36786
0.595399	0.790341	0.49117	0.605765	0.753128	0.358683	0.425535	0.550761
0.568061	0.614483	0.559394	0.350801	0.413354	0.553925	0.455412	0.658616
0.475332	0.527556	0.461962	0.703383	0.278723	0.599112	0.345177	0.760384
0.517533	0.341872	0.229297	0.128087	0.604811	0.73805	0.51418	0.378791
0.127445	0.887485	0.406901	0.494753	0.562611	0.485761	0.497322	0.846821
0.456419	0.341671	0.265393	0.49608	0.408385	0.393852	0.514364	0.497065
0.633929	0.467554	0.579157	0.507732	0.638416	0.386755	0.450855	0.682894
0.511158	0.511976	0.584444	0.578673	0.254436	0.712116	0.561504	0.464807
0.50085	0.680767	0.600934	0.364098	0.676336	0.320375	0.514997	0.575197
	0.495646	0.369602	0.782978	0.584689	0.165986	0.582729	0.699014
0.78196	0.734176	0.395828	0.555357	0.785231	0.724204	0.638888	0.392233
0.537118	0.295249	0.3653	0.143417	0.601542	0.409274	0.329796	0.331212
0.622151	0.679979	0.545264	0.690951	0.856267	0.553981	0.485632	0.38933
0.589583	0.632989	0.535213	0.460249	0.596683	0.571874	0.298455	0.514454
0.814168	0.896296	0.437294	0.584943	0.568462	0.3693	0.51405	0.483805
0.884196	0.827489	0.394618	0.653334	0.62228	0.63963	0.474479	0.554633
0.627982	0.541061	0.581385	0.7956	0.731052	0.518919	0.228918	0.498716
0.704761	0.367018	0.541985	0.499751	0.542794	0.229196	0.501593	0.694477
0.775482	0.470396	0.353016	0.389438	0.544628	0.708858	0.531563	0.642942
0.547956	0.578082	0.52023	0.654871	0.460312	0.599804	0.330231	0.360892
0.724772	0.433967	0.398978	0.658021	0.330403	0.77928	0.46664	0.707623
0.67952	0.647969	0.391091	0.36548	0.375606	0.526645	0.45383	0.635471
0.571281	0.372362	0.381153	0.744386	0.382798	0.561599	0.127419	0.366093
0.779732	0.444226	0.535038	0.525583	0.49901	0.339392	0.267329	0.65982
0.71876	0.424222	0.504914	0.678583	0.301692	0.516824	0.581296	0.16001
0.856337	0.834947	0.316877	0.32423	0.551562	0.591069	0.323541	0.687849
0.705347	0.675399	0.417018	0.62041	0.235629	0.284108	0.529997	0.563475
0.536914	0.782168	0.309252	0.343025	0.426906	0.808645	0.41884	0.504302
0.708881	0.82561	0.264266	0.369886	0.601462	0.685625	0.475591	0.577982
0.858221	0.552069	0.375146	0.511196	0.394942	0.306534	0.455371	0.572444
0.684049	0.499133	0.437883	0.70166	0.690971	0.541094	0.322006	0.687502
0.904511	0.907791	0.234347	0.494089	0.562785	0.729012	0.615389	0.189797
0.556474	0.508333	0.362953	0.792379	0.572227	0.572641	0.519137	0.364536
0.508476	0.554508	0.553973	0.53347	0.377031	0.141627	0.458561	0.346108
0.566996	0.600799	0.437787	0.55546	0.691751		0.355844	0.535571
0.869105	0.788028	0.273174	0.469124	0.425366	0.591693	0.489633	0.840141
0.727444	0.810271	0.488349	0.352914	0.6521	0.548928	0.482848	0.833026
0.79769	0.634758	0.523234	0.10247	0.52774	0.620988	0.394925	0.632673
0.756783	0.850982	0.603836	0.39553	0.521836	0.524954	0.57465	0.524238
0.794429	0.624345	0.371482	0.476792	0.525593	0.706298	0.433099	0.582003
0.507223	0.810746	0.298837	0.73493	0.620192	0.596699	0.398818	0.808577
0.849053	0.831783	0.562222	0.491913	0.571245	0.501539	0.496162	0.747085
0.642878	0.501721	0.439411	0.483504	0.453143	0.793941	0.329362	0.754838
0.835511	0.693013	0.364612	0.47835	0.552824	0.792084	0.541785	0.537235
0.779306	0.612116	0.486609	0.289857	0.381825	0.806571	0.433509	0.674758
0.450637	0.13756	0.387405	0.747107	0.4701	0.782217	0.391425	0.572003
0.486266	0.457481	0.224427	0.744063	0.604838	0.430686	0.508686	0.420481
0.426969	0.844368	0.570872	0.516345	0.554784	0.595638	0.421497	0.771156
0.757361	0.269635	0.482501	0.390299	0.292609	0.45709	0.572199	0.508143
0.708131	0.627174	0.503589	0.303799	0.708223	0.55885	0.24182	0.701273
0.820107	0.828825	0.53159	0.583171	0.509747	0.478549	0.323122	0.404957
0.546957	0.726085	0.41957	0.65941	0.420435	0.409115	0.297712	0.746058
0.678545	0.445094	0.590236	0.368185	0.243781	0.448659	0.525696	0.681339
0.882466	0.657374	0.523609	0.295418	0.600737	0.5842	0.524292	0.58334
0.809658	0.322022	0.413546	0.442248	0.629668	0.465671	0.626356	0.415444
0.828083	0.830553	0.691099	0.431348	0.702595	0.513069	0.662277	0.799146
0.7364	0.832445	0.499362	0.395245	0.491073	0.703729	0.243665	0.730298
0.641361	0.353204	0.416891	0.511532	0.526934	0.558322	0.351121	0.614774
0.62963	0.695517	0.546675	0.451442	0.675699	0.70207	0.169307	0.130414
0.678836	0.457178	0.742903	0.717714	0.644394	0.810598	0.616755	0.610941
0.662947	0.265579	0.383396	0.396958	0.535339	0.718306	0.396387	0.427895
0.630243	0.863134	0.588617	0.407973	0.596414	0.756585	0.426515	0.652485
0.76121	0.526884	0.491254	0.545156	0.295877	0.893954	0.395567	0.727945
0.524707	0.863647	0.297645	0.34228	0.463981	0.482345	0.628959	0.751249
0.70336	0.462335	0.2323	0.469386	0.389007	0.813022	0.444926	0.166397
0.896562	0.718136	0.73398	0.525402	0.579802	0.6535	0.760225	0.465893
0.348443	0.444483	0.651252	0.490828	0.656895	0.656911	0.381215	0.153368
0.847105	0.762784	0.450226	0.650678	0.636131	0.673397	0.529367	0.565517
0.568649	0.332249	0.674676	0.139706	0.616972	0.593036	0.456521	0.530801
0.768006	0.140029	0.52487	0.830833	0.516939	0.818101	0.736685	0.419127
0.655061	0.607455	0.385081	0.412457	0.428934	0.62297	0.486978	0.269774
0.887054	0.505701	0.586487	0.813632	0.56924	0.617498	0.624716
0.614359	0.81718	0.353424	0.379493	0.625585	0.163883	0.436158	0.859719
0.798552	0.722129	0.210644	0.669637	0.778932	0.885714	0.499444	0.842186
0.701368	0.789719	0.641659	0.516802	0.598311	0.632165	0.491112	0.887339
0.801514	0.525395	0.639403	0.0888277	0.56184	0.809481	0.122158	0.772725
0.84582	0.830233	0.384394	0.334768	0.271093	0.600579	0.438567	0.831898
0.506666	0.469772	0.514346	0.34755	0.626173	0.641983	0.585034	0.910395
0.339603	0.464743	0.269875	0.746839	0.520302	0.390777	0.332495	0.640653
0.842578	0.14722	0.428229	0.562748	0.5914	0.780215	0.327147	0.55979
0.380138	0.328393	0.248461	0.415779	0.455028	0.846635	0.310154	0.92192
0.631291	0.39898	0.548945	0.74293	0.261747	0.835321	0.458241	0.734467
0.737559	0.712165	0.463147	0.77289	0.625821	0.602549	0.442512	0.646055
0.823001	0.506753	0.742102	0.336704	0.501343	0.630621	0.414324	0.862913
0.822267	0.477662	0.678774	0.577055	0.513217	0.849842	0.36349	0.915015
0.901093	0.676031	0.347066	0.680013	0.609238	0.871681	0.536642	0.829582
0.427053	0.349028	0.444365	0.765658	0.458258	0.639115	0.319041	0.754386
0.507989		0.482997	0.643272	0.586426	0.820589	0.53952	0.794091
0.859401	0.73494	0.74114	0.482366	0.478366	0.908676	0.289552	0.680985
0.911175	0.698677	0.271015	0.423579	0.499198	0.810305	0.141243	0.289773
0.509887	0.567795	0.468252	0.627584	0.494046	0.69017	0.459951	0.932696
0.856777	0.752281	0.689423	0.532345	0.386941	0.842484	0.38151	0.868261
0.499347	0.704925	0.545716	0.41015	0.744314	0.849203	0.403833	0.922513
0.880599	0.832456	0.513799	0.364458	0.555631	0.788198	0.51206	0.640483
0.75117	0.68564	0.289742	0.568195	0.575808	0.791696	0.633266	0.830241
0.652564	0.666915	0.561655	0.525673	0.470753	0.558699	0.480804	0.649095
0.607711	0.932978	0.580791	0.227578	0.482981	0.717338	0.500119	0.653153
0.906495	0.498102	0.620223	0.452696	0.292136	0.771136	0.203835	0.718474
0.587085	0.7352	0.479934	0.154714	0.695499	0.819032	0.339485	0.528841
0.622939	0.640436	0.247179	0.793885	0.652612	0.332379	0.261614	0.935871
0.834706	0.689347	0.431285	0.118501	0.572214	0.416414	0.450232	0.813167
0.830906	0.765064	0.470897		0.408819	0.483832	0.464239	0.275821
0.784538	0.513789	0.466073	0.0983272	0.589174	0.555051	0.213727	0.728508
0.876613	0.47703	0.56246	0.241377	0.564996	0.674913	0.309529	0.603256
0.710017	0.486266	0.819848	0.563235	0.650316	0.315753	0.318762	0.877373
0.585384	0.641884	0.455392	0.429088	0.669016	0.70793	0.32114	0.899069
0.743687	0.431851	0.212317	0.685174	0.534995	0.792281	0.525128	0.82082
0.583408	0.602831	0.462155	0.53314	0.0806373	0.544965	0.131406	0.766829
0.597	0.380516	0.102568	0.643633		0.72875	0.515505	0.639145
0.773895	0.673191	0.458041	0.766251	0.590567	0.85448	0.373426	0.715499
0.777778	0.616524	0.516445	0.65578	0.560483	0.679238	0.573576	0.882072
0.366822	0.410273	0.414182	0.545877	0.490163	0.717098	0.397396	0.813819
0.642317	0.52624	0.50134	0.481938	0.341587	0.85792	0.538176	0.524152
0.672442	0.571842	0.366914	0.633234	0.449969	0.597471	0.34318	0.875711
0.499908	0.531968	0.611141	0.66987	0.443378	0.581378	0.535546	0.931768
0.566919	0.439138	0.652377	0.351752	0.473854	0.582061	0.536719	0.816361
0.546245	0.412061	0.317674	0.476351	0.414818	0.683602	0.561985	0.721828
0.6069	0.357484	0.2664	0.407488	0.321995	0.730177	0.565392	0.62951
0.8172	0.466164	0.538917	0.47417	0.610916	0.650647	0.383512	0.851289
0.440072	0.711102	0.410315	0.518563	0.396874	0.662562	0.482876	0.774524
0.910992	0.396881	0.396906	0.822272	0.72512	0.55961	0.500671	0.365967
0.758325	0.58703	0.24992	0.719597	0.669284	0.594409	0.222891	0.674178
0.129925	0.2347	0.423216	0.465224	0.459595	0.872098	0.200435	0.888284
0.492379	0.513287	0.304904	0.419407	0.399814	0.479054	0.492786	0.838534
0.565192	0.629146	0.506317	0.598089	0.451144	0.811092	0.492749	0.203325
0.636463	0.260312	0.543638	0.546219	0.298812	0.825705	0.498318	0.924072
0.339242	0.479357	0.11531	0.724511	0.508744	0.660182	0.401194	0.848866
0.752679	0.56852	0.238196	0.777745	0.49535	0.713847	0.350777	0.82917
0.870576	0.780578	0.484408	0.379887	0.590867	0.535811	0.347875	0.676182
0.799104	0.7882	0.454223	0.614414	0.551879	0.762581		0.920834
0.38667	0.36948	0.407262	0.805702	0.499131	0.733549	0.094143	0.910994
0.548416	0.560052	0.171659	0.232513	0.50249	0.752389	0.512492	0.799741
0.537292	0.694691	0.762099	0.529316	0.560855	0.734371	0.72132	0.787372
0.785535	0.542511	0.392571	0.55683	0.512708	0.577502	0.2488	0.663099
0.90535	0.355535	0.570832	0.372002	0.612717	0.630581	0.833596	0.46604
0.570895	0.567128	0.47193	0.43065	0.564423	0.797652	0.456416	0.611743
0.753788	0.224693	0.429042	0.605025	0.460204	0.760573	0.502631	0.716529
0.357113	0.488109	0.455587	0.666006	0.340115	0.307206	0.385435	0.825113
0.441321	0.693283	0.577177	0.704953	0.787713	0.576228	0.39656	0.600968
0.513155	0.752524	0.446691	0.62404	0.527756	0.717459	0.690626	0.742595
0.815758	0.616337	0.317668	0.438751	0.560592	0.86339	0.381239	0.701125
0.74698	0.646239	0.325242	0.423511	0.365107	0.745215	0.473124	0.351677
0.455588	0.68859	0.350345	0.498598	0.536569	0.671417	0.675283	0.700831
0.847176	0.448541	0.42417	0.71968	0.665119	0.704241	0.486088
0.836074	0.338325	0.252354	0.602147	0.604477	0.810472	0.609902	0.736956
0.573791	0.560582	0.609385	0.649285	0.565879	0.616724	0.587135	0.85495
0.684457	0.466099	0.711689	0.506977	0.341413	0.439926	0.709457	0.375248
0.613077	0.637402	0.32505	0.586342	0.549719	0.724779	0.582822	0.701425
0.887138	0.853215	0.600834	0.749875	0.470244	0.615488	0.454468	0.602903
0.778234	0.673022	0.514548	0.702643	0.488361	0.49778	0.495886	0.872759
0.795052	0.539356	0.424924	0.712673	0.438923	0.806066	0.42803	0.459892
0.670179	0.618079	0.483514	0.51052	0.460344	0.867644	0.690415	0.819296
0.708973	0.672438	0.696574	0.471688	0.394484	0.775214	0.380624	0.314336
0.841679	0.424388	0.480705	0.322579	0.426906	0.532427	0.382391	0.616632
0.644062	0.612828	0.451122	0.464199	0.720565	0.602626	0.684841	0.530975
0.820943	0.251851	0.399206	0.244696	0.708661	0.888857	0.436937	0.696945
0.806698	0.446377	0.45079	0.714178	0.355414	0.533769	0.549128	0.426745
0.894642	0.524702	0.135044	0.772374	0.545542	0.541529	0.319614	0.673483
0.867604	0.598249	0.531675	0.733705	0.535092	0.726782	0.450644	0.824947
0.81526	0.597882	0.396766	0.617494	0.525504	0.239875	0.568109	0.863523
0.658752	0.581966	0.592196	0.671949	0.551698	0.531326	0.752227	0.612599
0.899651	0.615333	0.470749	0.602697	0.510837	0.888549	0.407868	0.579703
0.640371	0.695349	0.559862	0.557191	0.51627	0.580119	0.471532	0.593693
0.154014	0.47292	0.435275	0.44774	0.433465	0.43962	0.612091	0.711285
0.519148	0.541497	0.498064	0.68475	0.518288	0.607563	0.558081	0.913678
0.495807	0.390531	0.438145	0.425857	0.393016	0.812854	0.31955	0.636064
0.718758	0.492604	0.438279	0.749053	0.553915	0.803225	0.67249	0.878381
0.827381	0.591104	0.560581	0.519328	0.595842	0.480964	0.562816	0.815864
0.892991	0.760257	0.598629	0.211721	0.435405	0.807933	0.408215	0.441674
0.529927	0.649225	0.236888	0.712318	0.632795	0.71148	0.789946	0.713884
0.502161	0.60014	0.223521	0.750305	0.368131	0.623498	0.604638	0.646232
0.747712	0.41337	0.321586	0.542142	0.617904	0.469736	0.348725	0.417217
0.887575	0.489772	0.126948	0.590157	0.478037	0.592838	0.767566	0.888815
0.643281	0.51506		0.486488	0.350681	0.650545	0.260103	0.764371
0.904798	0.660764	0.691682	0.648406	0.535073	0.722309	0.599133	0.776804
0.915694	0.544997	0.367727	0.408092	0.438024	0.657087	0.502678	0.911829
0.647955	0.448247	0.617933	0.877628	0.504026	0.667157	0.480304	0.721912
0.64816	0.59604	0.464704	0.649595	0.457559	0.834771	0.600386	0.792623
0.697338	0.54493	0.408981	0.502327	0.376195	0.661614	0.471146	0.915495
0.82139	0.763507	0.454529	0.800683	0.618626	0.123043	0.738923	0.939288
0.847202	0.363669	0.383024	0.42305	0.68793	0.686749	0.70901	0.55734
0.867044	0.711562	0.641138	0.718118	0.543252	0.794136	0.561988	0.662408
0.504252	0.556882	0.464723	0.436293	0.282164	0.452047	0.573892	0.700117
0.630779	0.586819	0.45509	0.814288	0.485005	0.706065	0.592235	0.6907
0.355434	0.803756	0.316225	0.77752	0.373188	0.516584	0.524429	0.793169
0.559908	0.529185	0.461249	0.830643	0.757098	0.410413	0.611339	0.527318
0.661683	0.620307	0.604676	0.635942	0.226706	0.832851	0.545926	0.921559
0.59166	0.596659	0.425542	0.526223	0.580266	0.603833	0.536855	0.774823
0.625305	0.718298	0.690763	0.411	0.644608	0.448908	0.551805	0.856581
0.694623	0.425563	0.473199	0.83951	0.329652	0.298576	0.482891	0.570049
0.569678	0.284142	0.493217	0.64005	0.49738	0.820127	0.296373	0.860332
0.565421	0.873041	0.520988	0.75282	0.530813	0.724687	0.478139	0.887423
0.845109	0.665459	0.529838	0.728195	0.468192	0.667985	0.515476	0.810758
	0.506551	0.483653	0.630181	0.653697	0.808295	0.306144	0.314178
0.835335	0.671801	0.474875	0.80889	0.507679	0.816524	0.421289	0.777741
0.65321	0.559554	0.534314	0.498191	0.596266	0.668002	0.726457	0.424732
0.690715	0.758493	0.80228	0.333689	0.63878	0.576412	0.670834	0.336967
0.478542	0.588003	0.556109	0.518263	0.478875	0.758079	0.623525	0.531724
0.840292	0.711027	0.37617	0.244865	0.553312	0.407697	0.15811	0.665273
0.619657	0.424466	0.413856	0.770995	0.766072	0.762451	0.813719	0.766651
0.764006	0.551233	0.350845	0.58211	0.645755	0.757424	0.478447	0.807495
0.502121	0.331005	0.353381	0.679631	0.456077	0.83706	0.236963	0.878042
0.864627	0.677948	0.528481	0.665866	0.559828	0.583001	0.51826	0.601832
0.893241	0.852266	0.505522	0.560854	0.277941	0.754798	0.411879	0.828069
0.921282	0.505365	0.460642	0.28361	0.504189	0.510839	0.426526	0.920651
0.667884	0.75704	0.473813	0.715523	0.648616	0.683334	0.609019	0.819544
0.645151	0.669242	0.364452	0.771064	0.509891	0.529061	0.583059	0.358985
0.893341	0.509656	0.4605	0.678729	0.39116	0.695728	0.492919	0.535857
0.495471	0.690654	0.431355	0.652886	0.255468	0.636117	0.718367	0.899921
0.566524	0.713884	0.558302	0.786153	0.354018	0.729137	0.476552	0.909173
0.623402	0.701717	0.704167	0.846569	0.672991	0.443	0.437444	0.858718
0.783791	0.556938	0.498022	0.764604	0.349536	0.49105	0.605081	0.650881
0.888507	0.750206	0.50228	0.870165	0.737728	0.841852	0.635524	0.598024
0.704182	0.799516	0.358769	0.569264	0.361032	0.82336	0.565039	0.669192
0.610745	0.425584	0.371839	0.769728	0.66351	0.835223	0.541055	0.641031
0.796469	0.504447	0.451361	0.786674	0.550347	0.504021	0.526097	0.187531
0.614788	0.857734	0.543336	0.524586	0.482621	0.316392	0.685404	0.908793
0.710997	0.582749	0.423515	0.798046	0.654564	0.613365	0.527154	0.490858
0.623535	0.661838	0.665703	0.52462	0.397497	0.422363	0.486864	0.764796
0.593461	0.578536	0.255645	0.729037	0.433163	0.534419	0.404791	0.909635
0.671846	0.595074	0.682236	0.718458	0.797039	0.486989	0.279274	0.248433
0.773426	0.699618	0.491501	0.827297	0.32131	0.704661	0.285071	0.576469
0.484104	0.645805	0.37201	0.633057	0.501096	0.748239	0.55836	0.653143
0.659965	0.841917	0.437024	0.834571	0.689695	0.533951	0.607198	0.444398
0.674805	0.553232	0.532098	0.449731	0.781117	0.42529	0.478821	0.841302
0.929842	0.764098	0.536335	0.573396	0.455721	0.201787	0.529042	0.696799
0.880576	0.546224	0.547037	0.774085	0.487609	0.55287	0.64691	0.737019
0.528038	0.155421	0.311245	0.902848	0.62543	0.616432	0.439963	0.638114
0.542105	0.776467	0.579385	0.455229	0.678737	0.37093	0.405699	0.403543
0.688271	0.59264	0.571781	0.233625	0.517581	0.734269	0.539936	0.542423
0.545078	0.619593	0.493992	0.8734	0.661208	0.286124	0.507112	0.0971868
0.911893	0.830205	0.344477	0.78267	0.571582	0.705073	0.421056	0.504618
0.920472	0.547689	0.633934	0.614002	0.438326	0.423809	0.636104	0.770236
0.85916	0.63336	0.556673	0.803373	0.508576	0.442921	0.558976	0.848308
0.365433	0.449367	0.361236	0.560221	0.32933	0.574068	0.448216	0.321993
0.679592	0.912217	0.699102	0.47038	0.65471	0.661477	0.212993	0.470516
0.75596	0.540447	0.552662	0.821352	0.299726	0.398581	0.497324	0.59591
0.765321	0.814618	0.53748	0.636499	0.545271	0.555247	0.473433	0.461971
0.680276	0.440866	0.5698	0.774647	0.669146	0.342009	0.692375	0.657006
0.684346	0.714457	0.245023	0.709851	0.470788	0.417905	0.67919	0.529099
0.895854	0.452148	0.413669	0.695026	0.296009	0.728201	0.606102	0.655656
0.926001	0.50704	0.595276	0.613695	0.502219	0.373721	0.46737	0.791071
0.638275	0.608845	0.525189	0.57858	0.166064	0.447204	0.691257	0.889202
0.950865	0.623803	0.505734	0.838369	0.456736	0.494651	0.480391	0.491587
0.736874	0.676188	0.686624	0.609274	0.537626	0.582016	0.624666	0.596726
0.800517	0.41356	0.557842	0.752126	0.579269	0.465047	0.784346	0.652986
0.638458	0.702299	0.459146	0.723866	0.424555	0.193162	0.454961	0.419988
0.821781	0.684843	0.56014	0.715061	0.539783	0.443848	0.445141	0.721201
0.800998	0.485118	0.585473	0.716607	0.518701	0.514323	0.773079	0.79532
0.869125	0.52474	0.182068	0.589123	0.511521	0.52246	0.43976	0.572535
0.579709	0.547161	0.265423	0.783608	0.620499	0.278891	0.634873	0.661377
0.774298	0.842801	0.186784	0.442418	0.370884	0.277096	0.419716	0.575998
0.341018	0.507206	0.66713	0.426148	0.531124	0.694391	0.63571	0.767211
0.710672	0.568008	0.258327	0.597197	0.520329	0.501901	0.507189	0.699304
0.731669	0.411664	0.58906	0.912206	0.101603		0.594314	0.424247
0.456861	0.464592	0.40349	0.714047	0.595618	0.0890519	0.72718
0.73055	0.826656	0.36728	0.706719	0.542405	0.269535	0.333541	0.0755581
0.648029	0.665196	0.385091	0.857674	0.280478	0.675008	0.632901	0.0687513
0.626995	0.586009	0.438555	0.646336	0.432464	0.363559	0.587204	0.74013
0.527906	0.617524	0.576125	0.838926	0.551509	0.320627	0.386403	0.553678
0.786333	0.739477	0.366999	0.519853	0.354866	0.575857	0.618452	0.564743
0.563146	0.840899	0.616598	0.433085	0.495407	0.543559	0.515423	0.310764
0.507629	0.506311	0.364511	0.485324	0.545522	0.872938	0.363468	0.505938
0.574323	0.36566	0.41038	0.631586	0.44984	0.309038	0.452468	0.631815
0.642916	0.672564	0.501764	0.674974	0.461536	0.469638	0.460799	0.67119
0.751216	0.570635	0.225963	0.49341	0.153961	0.678506	0.490594	0.673108
0.749677	0.800088	0.489334	0.778754	0.514821	0.885849	0.650726	0.73928
0.951644	0.739197	0.552982	0.475355	0.463513	0.929535	0.418516	0.641882
0.951397	0.501442	0.166644	0.731685	0.673675	0.487899	0.852273	0.433858
0.704618	0.715608	0.405505	0.810255	0.40694	0.736281	0.60405	0.3763
0.384549	0.623265	0.564924	0.265578	0.54028	0.581367	0.524445	0.685272
0.517164	0.807303	0.694394	0.444868	0.386071	0.397488	0.629452	0.370807
0.528163	0.546762	0.308866	0.655356	0.372458	0.530032	0.66367	0.645463
0.721552	0.68906	0.438077	0.854507	0.501575	0.719742	0.635837	0.771128
0.725864	0.678717	0.41774	0.530537	0.504134	0.874913	0.518304	0.47197
0.715576	0.55914	0.700428	0.638882	0.406186	0.554454	0.701732	0.67369
0.796088	0.581207	0.456052	0.80655	0.322749	0.860448	0.63319	0.361908
0.340931	0.371233	0.443845	0.541606	0.571529	0.914751	0.632991	0.239893
0.918076	0.744095	0.563667	0.793698	0.600549	0.640308	0.448594	0.694763
0.649354	0.529199	0.445105	0.608578	0.402786	0.817391	0.581449	0.621481
0.833579	0.285293	0.516478	0.673983	0.504448	0.60498	0.353517	0.555533
0.916508	0.688765	0.383746	0.566429	0.553558	0.864947	0.642608	0.830191
0.583468	0.662976	0.308016	0.783418	0.287391	0.624489	0.457331	0.566959
0.510584	0.43231	0.493117	0.675963	0.709271	0.286898	0.630356	0.588667
0.716204	0.836667	0.59169	0.633577	0.439232	0.246066	0.36069	0.510468
0.905539	0.496047	0.438429	0.661171	0.568989	0.885344	0.565261	0.667913
0.752012	0.523604	0.564122	0.504299	0.458847	0.726305	0.377048	0.661882
0.787139	0.390644	0.426128	0.547575	0.44257	0.45042	0.644325	0.418839
0.676749	0.65612	0.579098	0.492305	0.452584	0.624367	0.459798	0.494661
0.390468	0.349992	0.405593	0.646234	0.678048	0.711412	0.620707	0.446795
0.494262	0.495836	0.666452	0.749638	0.589094	0.888425	0.55808	0.249956
0.51573	0.566951	0.396349	0.434144	0.59212	0.901529	0.261708	0.556653
0.916084	0.554346	0.390608	0.551125	0.487035	0.883135	0.488164	0.591011
0.845963	0.749073	0.643504	0.351344	0.489933	0.569578	0.489318	0.764822
0.41024	0.568874	0.564066	0.729878	0.159072	0.716093	0.608481	0.543294
0.373247	0.40304	0.391821	0.742109	0.561191	0.922764	0.280792	0.391703
0.596771	0.551586	0.504155	0.352137	0.710552	0.640713	0.432921	0.408578
0.47137	0.682911	0.43055	0.803694	0.449159	0.381054	0.575811	0.509013
0.415069	0.771101	0.515322	0.783508	0.581874	0.568482	0.514046	0.343811
0.841589	0.750122	0.315349	0.411019	0.50199	0.74894	0.419957	0.610479
0.660335	0.890236	0.308466	0.566973	0.374884	0.725445	0.500875	0.236851
0.782026	0.774659	0.35181	0.654308	0.347684	0.844429	0.432607	0.484098
0.656512	0.926785	0.418424	0.634391	0.263606	0.479719	0.471496	0.394611
0.607747	0.513639	0.441119	0.33054	0.428083	0.830781	0.607648	0.649113
0.644268	0.664594	0.313463	0.782009	0.476036	0.366456	0.599763	0.558781
0.931722	0.658946	0.509535	0.297791	0.420092	0.808215	0.540331	0.518803
0.101429	0.820688	0.390866	0.575555	0.422088	0.5315	0.473973	0.646483
0.713267	0.680374	0.520184	0.615324		0.240095	0.527937	0.49631
0.612072	0.594633	0.216054	0.714614	0.750832	0.74419	0.506652	0.505257
0.898859	0.633716	0.536236	0.557562	0.553673	0.677938	0.681423	0.789522
0.516354	0.619903	0.571559	0.812065	0.730838	0.839915	0.664594	0.673807
0.634494	0.654962	0.633457	0.522038	0.439391	0.5614	0.597802	0.624877
0.389331	0.84244	0.512917	0.797154	0.769216	0.895537	0.686302	0.85331
0.605378	0.413418	0.432318	0.420913	0.559236	0.563091	0.689582	0.445567
0.91128	0.61951	0.435503		0.79983	0.534542	0.360965	0.561415
0.740927	0.87236	0.788432	0.0746364	0.535278	0.596773	0.823677	0.861102
0.849543	0.451577	0.361575	0.657256	0.473627	0.737141	0.516612	0.663384
0.697823	0.639932	0.654183	0.309978	0.478007	0.704291	0.629025	0.584595
0.848703	0.793943	0.317804	0.711757	0.436465	0.787384	0.629451	0.873474
0.894557	0.747099	0.533893	0.901677	0.642768	0.709386	0.606527	0.438454
0.845369	0.734667	0.566949	0.649988	0.542959	0.505051	0.292179	0.75421
0.875849	0.722441	0.562333	0.497367	0.540499	0.489844	0.362542	0.482467
0.869775	0.674292	0.118313	0.67044	0.486282	0.378104	0.73942	0.337701
0.734974	0.497692	0.55414	0.683553	0.454965	0.67696	0.768775	0.381828
0.645363	0.402867	0.560784	0.717287	0.44956	0.763532	0.549936	0.724191
0.289909	0.4334	0.790653	0.314548	0.551835	0.303107	0.667993	0.454206
0.724899	0.830085	0.656416	0.721422	0.534995		0.70078	0.322999
0.46167	0.47861	0.25941	0.471336	0.342349	0.0876301		0.413763
0.732192	0.865787	0.424399	0.682571	0.617197	0.708948	0.0891581	0.674192
0.516899	0.430707	0.726496	0.597765	0.387526	0.525113	0.465036	0.861722
0.831494	0.722842	0.598594	0.914212	0.554364	0.406888	0.388454	0.512224
0.814353	0.419484	0.579229	0.861798	0.578407	0.705237	0.310323	0.412082
0.692043	0.782049	0.379629	0.674775	0.69948	0.418504	0.468072	0.52282
0.439282	0.604248	0.516087	0.835361	0.696096	0.58363	0.308423	0.66791
	0.75673	0.575028	0.741542	0.421127	0.376666	0.550185	0.538314
0.809849	0.636941	0.589013	0.83094	0.543168	0.750315	0.455857	0.471538
0.403711	0.156518	0.459535	0.588718	0.651235	0.743187	0.517466	0.461731
0.330667	0.680157	0.564172	0.676023	0.590054	0.700945	0.264271	0.436183
0.856482	0.588971	0.637865	0.819981	0.340077	0.311648	0.426882	0.201937
0.650852	0.549876	0.519764	0.597562	0.869078	0.389794	0.545255	0.729885
0.285874	0.680334	0.461348	0.820383	0.246138	0.316679	0.415013	0.463283
0.732594	0.457868	0.76102	0.659641	0.37726	0.64848	0.361545	0.671005
0.521688	0.504336	0.59184	0.409355	0.664266	0.712103	0.321438	0.872434
0.796872	0.4965	0.847861	0.700887	0.421875	0.657528	0.502609	0.488071
0.722409	0.874446	0.651894	0.581736	0.501744	0.813921	0.463635	0.235611
0.592973	0.727669	0.358869	0.680237	0.560374	0.752	0.421443	0.666086
0.751983	0.679461	0.652842	0.87068	0.592456	0.530375	0.48828	0.421922
0.485721	0.606107	0.643949	0.461953	0.468961	0.767364	0.545269	0.737497
0.48778	0.661198	0.5376	0.392976	0.257641	0.677507	0.536066	0.645345
0.44691	0.43188	0.53507	0.522906	0.549356	0.689498	0.535069	0.293074
0.715363	0.874886	0.668378	0.662028	0.539709	0.551726	0.238176	0.621369
0.724086	0.843874	0.509728	0.870642	0.623837	0.653413	0.681022	0.601005
0.649261	0.367833	0.664085	0.646356	0.54275	0.811343	0.372592	0.446828
0.524993	0.456691	0.483327	0.327841	0.390929	0.541932	0.733752	0.498677
0.687425	0.677475	0.436901	0.640569	0.598717	0.63591	0.451263	0.466756
0.539946	0.514715	0.486147	0.385267	0.614033	0.592716	0.706464	0.389293
0.666921	0.596561	0.667109	0.603717	0.558228	0.749763	0.531199	0.530072
0.513173	0.474289	0.757094	0.599983	0.742697	0.532586	0.35868	0.831572
0.726083	0.629171	0.65517	0.463807	0.282796	0.587875	0.833341	0.604695
0.610547	0.293644	0.398161	0.856388	0.721311	0.418034	0.684739	0.658496
0.583961	0.570368	0.275218	0.301924	0.533573	0.740375	0.471156	0.793988
0.622757	0.629197	0.527716	0.352186	0.626594	0.752048	0.580794	0.238378
0.646901	0.683725	0.48224	0.272421	0.680002	0.722184	0.561451	0.804133
0.617781	0.537377	0.517036	0.724342	0.641544	0.795859	0.568799	0.875138
0.845835	0.836664	0.509919	0.833466	0.672675	0.384323	0.393242	0.241521
0.537867	0.442999	0.524554	0.460982	0.538152	0.700404	0.487033	0.628766
0.72527	0.251244	0.456275	0.806141	0.615432	0.532935	0.423732	0.505105
0.796418	0.617905	0.448755	0.629543	0.774965	0.695937	0.638528	0.698296
0.774765	0.595357	0.558588	0.333168	0.83038	0.590884	0.581707	0.561874
0.579053	0.854797	0.396197	0.79293	0.526555	0.596557	0.408631	0.65868
0.551988	0.29405	0.592858	0.373133	0.472693	0.317915	0.608823	0.42574
0.508801	0.496087	0.491532	0.451494	0.105151	0.781423	0.634364	0.744218
0.659932	0.365961	0.521439	0.659015	0.394264	0.710616	0.489449	0.778616
0.7134	0.536228	0.52934	0.835425	0.270887	0.805528	0.711795	0.745
0.680753	0.6922	0.593121	0.872466	0.318697	0.818429	0.339137	0.778242
0.874332	0.464443	0.619955	0.74974	0.585521	0.809199	0.255468	0.600677
0.654986	0.308367	0.308287	0.89505	0.591309	0.686549	0.566703	0.456117
0.517062	0.753261	0.470664	0.578446	0.373017	0.545309		0.488125
0.624092	0.463617	0.537914	0.551224		0.454034	0.656006	0.368582
0.501476	0.887713	0.529193	0.490307	0.638982	0.728371	0.506209	0.307914
0.815241	0.592223	0.513181	0.851501	0.544204	0.517228	0.705576	0.675351
0.81531	0.31675	0.576155	0.782655	0.459993	0.445325	0.342371	0.556829
0.65702	0.82211	0.264912	0.495102	0.70894	0.854826	0.818736	0.516652
0.805643	0.153079	0.665607	0.571902	0.662011	0.659172	0.478359	0.446036
0.506532	0.350211	0.42976	0.733634	0.583557	0.634081	0.545708	0.557879
0.299571	0.857605	0.582213	0.635939	0.571406	0.712122	0.47332	0.424796
0.85422	0.622717	0.321258	0.803179	0.358534	0.503545	0.468716	0.779959
0.774816	0.477871	0.107099	0.49788	0.495107	0.440372	0.353867	0.845104
0.662087	0.535495	0.4858	0.646518	0.536016	0.655447	0.740467	0.491304
0.596681	0.548047	0.502794	0.691526	0.750428	0.768471	0.356518	0.522809
0.548982	0.677306	0.598039	0.502778	0.625852	0.58617	0.562628	0.496319
0.863601	0.713359	0.757004	0.816979	0.697484	0.676204	0.370003	0.556523
0.850887	0.797887	0.664874	0.54548	0.550134	0.741038	0.45298	0.345231
0.651996	0.891457	0.670608	0.58747	0.627062	0.711303	0.457953	0.789837
0.641159	0.520398	0.753482	0.471532	0.719216	0.707056	0.548867	0.428301
0.545731	0.772013	0.425057	0.373358	0.681342	0.56931	0.585162	0.591221
0.557592	0.868437	0.410778	0.714278	0.619655	0.858888	0.713879	0.47188
0.354483	0.602831	0.336731	0.66114	0.560543	0.400117	0.386787	0.52451
0.688029	0.782036	0.398613	0.459343	0.588756	0.569494	0.553283	0.432943
0.682285	0.471548	0.608225	0.449722	0.286177	0.829433	0.57109	0.52899
0.642229	0.648734	0.4951	0.655613	0.469406	0.55613	0.293258	0.440737
0.902928	0.532273	0.597851	0.729331	0.831127	0.530664	0.355031	0.565728
0.774782	0.843607	0.594513	0.535494	0.508465	0.826196	0.492235	0.727361
0.758733	0.626097	0.580749	0.484727	0.386762	0.792312	0.739661	0.501537
0.756115	0.733288	0.702377	0.715179	0.498711	0.821988	0.432558	0.486821
0.484268	0.608694	0.453717	0.560506	0.337859	0.768244	0.497721	0.772237
0.762199	0.822569	0.575511	0.688682	0.690756	0.782245	0.370076	0.373264
0.464046	0.421056	0.533043	0.775241	0.575715	0.757724	0.645593	0.303589
0.839092	0.289535	0.567822	0.832213	0.348908	0.451185	0.617531	0.552695
0.401324	0.861783	0.477789	0.542219	0.606592	0.351109	0.570198	0.827719
0.610597	0.505087	0.711424	0.462328	0.671383	0.678434	0.24646	0.505296
0.8635	0.266247	0.57237	0.342348	0.526878	0.818233	0.459819	0.519161
0.525609	0.366273	0.80836	0.370841	0.568139	0.832582	0.319315	0.536305
0.796557	0.698424	0.536055	0.620689	0.309554	0.506816	0.44334	0.625186
0.886661	0.524613	0.378693	0.556828	0.314802	0.865462	0.426434	0.545056
0.510851	0.32196	0.499428	0.631644	0.413069	0.577676	0.312072	0.503573
0.771623	0.187721	0.464122	0.633304	0.146881	0.808326	0.683436	0.474325
0.69394	0.780675	0.520608	0.624014	0.198368	0.578843	0.50564	0.252165
0.801073	0.582918	0.43793	0.765852		0.7959	0.588629	0.443754
0.702368	0.448585	0.582184	0.772062	0.0857708	0.719793	0.350896	0.649998
0.623448	0.774832	0.436926	0.697091	0.577228	0.726207	0.609519	0.421415
0.698976	0.889906	0.622818	0.554444	0.633234	0.87058	0.561997	0.752114
0.830594	0.602073	0.618846	0.849971	0.36745	0.542006	0.428579	0.212071
0.924747	0.496275	0.322334	0.73522	0.497235	0.591952	0.402818	0.487643
0.655211	0.636864	0.620478	0.70485	0.440722	0.679573	0.627413	0.59046
0.634206	0.458245	0.485627	0.480709	0.323683	0.921206	0.390584	0.53705
0.658778	0.684051	0.609523	0.261613	0.761241	0.513629	0.4021	0.527707
0.680778	0.838543	0.525031	0.380233	0.359423	0.380193	0.347463	0.509578
0.50415	0.572744	0.514226	0.528532	0.457346	0.45177	0.623536	0.766386
0.688055	0.608914	0.413908	0.526685	0.345769	0.758496	0.357381	0.836192
0.778654	0.452379	0.563119	0.580347	0.400659	0.878761	0.573541	0.726424
0.545017	0.344358	0.517108	0.593746	0.51497	0.598725	0.759087	0.681612
0.781932	0.843101	0.716714	0.215383	0.375283	0.602542	0.731967	0.579535
0.522	0.729142	0.638066	0.764515	0.493313	0.721398	0.684667	0.459625
0.406697	0.714181	0.483478	0.677568	0.391653	0.390624	0.601727	0.47466
0.6196	0.81966	0.417341	0.364469	0.520188	0.438786	0.453216	0.404378
0.791062	0.519096	0.396652	0.607912	0.529607	0.685086	0.507876	0.327561
0.507887	0.389536	0.4367	0.276095	0.59258	0.524918	0.465426	0.788801
0.603481	0.380787	0.583934	0.266029	0.673131	0.559468	0.4214	0.525912
0.765883	0.516873	0.673897	0.268495	0.418447	0.829469	0.374624	0.780283
0.618184	0.60064	0.647201	0.477393	0.643061	0.75676	0.700835	0.548808
0.424607	0.55684	0.592758	0.435578	0.576548	0.891288	0.407629	0.300724
0.486556	0.641109	0.349253	0.520379	0.614204	0.756889	0.412696	0.609374
0.67007	0.737313	0.424638	0.148807	0.658812	0.65748	0.342617	0.478142
0.553819	0.66307	0.419284		0.752675	0.291013	0.444766	0.587874
0.368138	0.319209	0.466789	0.079673	0.518722	0.572743	0.674192	0.719753
0.600748	0.540678	0.470529	0.701492	0.441342	0.789321	0.587873	0.827962
0.746185	0.667026	0.43354	0.550761	0.467939	0.636933	0.372358	0.480311
0.451055	0.151161	0.411628	0.535218	0.453272	0.558607	0.349495	0.583856
0.728015	0.623985	0.561989	0.37926	0.500577	0.751939	0.529123	0.591682
0.528318	0.675857	0.47539	0.392822	0.358548	0.371878	0.458517	0.855486
0.557151	0.600108	0.555259	0.344128	0.589246	0.626884	0.742962	0.580701
0.75433	0.216125	0.307883	0.469536	0.525198	0.827668	0.481448	0.568838
0.377828	0.339224	0.431018	0.511754	0.82002	0.61729	0.58851	0.824164
0.639027	0.176982	0.55488	0.504964	0.572065	0.419079	0.5658	0.531925
0.402218	0.496394	0.611368	0.392629	0.486504	0.703211	0.775563	0.354436
0.814352	0.837192	0.37736	0.68777	0.523681	0.669071	0.396985	0.906035
0.670306	0.29212	0.580567	0.58421	0.504393	0.460746	0.385076	0.76322
0.511928	0.556783	0.519286	0.563573	0.515841	0.652636	0.335434	0.405223
0.514812	0.659647	0.784047	0.565425	0.508117	0.721726	0.55313	0.754178
0.815631	0.601658	0.334493	0.376867	0.387956	0.720988	0.573837	0.817822
0.396668	0.635084	0.335862	0.293033	0.455953	0.240805	0.575272	0.530211
0.59909	0.832537	0.468193	0.583865		0.495388	0.505206	0.550358
0.564325	0.604587	0.315562	0.470069	0.0898514	0.663803	0.344141	0.730633
0.553718	0.747608	0.506974	0.335215	0.465927	0.830639	0.660502	0.552442
0.735003	0.742463	0.378558	0.497268	0.648316	0.284588	0.363272	0.438133
0.716126	0.614846	0.537731	0.265452	0.653409	0.781394	0.555038	0.538026
0.54889	0.815569	0.65128	0.469425	0.341475	0.315195	0.449022
0.635283	0.827644	0.524255	0.527953	0.629354	0.483764	0.685351	0.138106
0.618982	0.474773	0.498689	0.594096	0.615195	0.313683	0.50371	0.427978
0.696941	0.848483	0.625473	0.505566	0.599344	0.712449	0.669647	0.52491
0.879748	0.586286	0.337163	0.796207	0.47803		0.505625	0.394557
0.545347	0.741424	0.369279	0.602964	0.572726	0.430313	0.560814	0.554884
0.576555	0.792884	0.495235	0.551737	0.384874	0.678442	0.504611	0.564469
0.73101	0.544249	0.451626	0.669339	0.522243	0.584363	0.641641	0.596062
0.742223	0.780727	0.725327	0.54989	0.46641	0.460307	0.639828	0.510813
0.689969	0.473277	0.442926	0.173109	0.593723	0.572055	0.561368	0.566643
0.568581		0.563071	0.54251	0.515218	0.559628	0.636403	0.443857
0.671749	0.589605	0.688909	0.568276	0.585856	0.44429	0.694619	0.707562
0.875784	0.564345	0.562532	0.20751	0.379551	0.556733	0.616094	0.784919
0.69861	0.595656	0.489342	0.827937	0.598608	0.355013	0.446743	0.753413
0.802706	0.390593	0.354389	0.546668	0.53995	0.435246	0.29825	0.541257
0.729147	0.554439	0.571585	0.277909	0.463007	0.457892	0.462666	0.533563
0.372323	0.402965	0.46707	0.665707	0.367005	0.522337	0.625232	0.599633
0.559311	0.429287	0.599274	0.311706	0.376772	0.498998	0.378024	0.510212
0.580159	0.593069	0.596053	0.410943	0.606761	0.455036	0.622577	0.380896
0.51779	0.56819	0.635627	0.432747	0.527642	0.35394	0.613243	0.727196
0.720873	0.821687	0.28012	0.837884	0.478741	0.386395	0.777619	0.489617
0.736572	0.568423	0.534151	0.553597	0.508334	0.418134	0.559285	0.623588
0.582185	0.438536	0.620123	0.218144	0.486385	0.554507	0.267836	0.29098
0.469197	0.41696	0.549984	0.260623	0.588492	0.552988	0.54438	0.754034
0.728778	0.651528	0.586117	0.260599	0.605791	0.36152	0.32714	0.26413
0.384035	0.504608	0.400274	0.534291	0.282426	0.425535	0.426736	0.799948
0.60712	0.598927	0.366606	0.31549	0.604086	0.464753	0.613035	0.45574
0.826893	0.501096	0.448499	0.599831	0.54065	0.481414	0.56804	0.501468
0.920785	0.539723	0.442434	0.422408	0.557831	0.425398	0.571066	0.521778
0.619994	0.832667	0.37997	0.529559	0.695802	0.48495	0.388935	0.601875
0.879835	0.635757	0.248054	0.519023	0.51337	0.554781	0.653644	0.398223
0.742381	0.656277	0.566978	0.357542	0.594122	0.496508	0.780029	0.21072
0.763738	0.805622	0.50936	0.754014	0.715754	0.333991	0.592704	0.36428
0.256797	0.457597	0.509555	0.372808	0.441681	0.365019	0.6411	0.62189
0.813178	0.724414	0.486198	0.207308	0.635801	0.43838	0.293483	0.577404
0.791282	0.616314	0.446578	0.461658	0.50936	0.425526	0.601281	0.740034
0.396859	0.583153	0.433781	0.537266	0.50957	0.779553	0.646557	0.643267
0.685145	0.25108	0.445606	0.494809	0.457597	0.526133	0.446549	0.571395
0.856892	0.654648	0.558558	0.828626	0.574373	0.327095	0.631072	0.686808
0.854916	0.27811	0.306379	0.656932	0.648015	0.449903	0.356617	0.68494
0.364705	0.485121	0.440327	0.371587	0.392257	0.382524	0.540052	0.413895
0.861207	0.658447	0.406424	0.735682	0.765471	0.448263	0.420392	0.348549
0.780134	0.385969	0.584615	0.74859	0.52449	0.302613	0.501656	0.564983
0.3263	0.414309	0.422745	0.385965	0.431216	0.398032	0.379967	0.173599
0.680514	0.594945	0.515575	0.726186	0.746855	0.407491	0.821076	0.374919
0.664276	0.521377	0.211433	0.820902	0.64573	0.488772	0.500906	0.45791
0.81897	0.567216	0.822603	0.52333	0.512218	0.519234	0.290773	0.562703
0.899562	0.350739	0.493669	0.527991	0.544584	0.284812	0.62186	0.659173
0.637905	0.735322	0.51717	0.529921	0.404082	0.350662	0.571539	0.260245
0.457733	0.409855	0.418443	0.434167	0.640747	0.578239	0.636985	0.786094
0.446612	0.809858	0.341025	0.111323	0.399853	0.479798	0.777433	0.410154
0.577051	0.753172	0.361142	0.684361	0.644424	0.657975	0.470875	0.775098
0.605747	0.607076	0.470696	0.634503	0.398478	0.541395	0.470801	0.427395
0.410224	0.431813	0.404679	0.792113	0.343796	0.490266	0.633208	0.32188
0.771258	0.589902	0.580181	0.346462	0.470919	0.408308	0.358512	0.680509
0.518008	0.430023	0.347132	0.717182	0.611368	0.472556	0.458747	0.247803
0.801642	0.603955	0.496558	0.616791	0.467145	0.420451	0.632913	0.506134
0.643186	0.807277	0.297473	0.602396	0.559571	0.289475	0.430766	0.348209
0.690008	0.59142	0.607411	0.197865	0.446298	0.542348	0.610242	0.758413
0.402909	0.493109	0.272503	0.592602	0.4259	0.607252	0.576911	0.648409
0.598654	0.321434	0.483832	0.834701	0.691745	0.417424	0.604377	0.776667
0.652951	0.5838	0.620384	0.561392	0.537205	0.327102	0.497887	0.469066
0.591128	0.603768	0.112302	0.714507	0.432642	0.204485	0.558915	0.257383
0.608345	0.455761	0.443161	0.380983	0.454838	0.466779	0.46631	0.722312
0.697643	0.528582	0.540387	0.686585	0.49761	0.314586	0.731978	0.442706
0.325078	0.507663	0.760229	0.387404	0.450673	0.425259	0.116564	0.454307
0.38563	0.54948	0.463908	0.500162	0.669868	0.278781	0.493374	0.573971
0.672423	0.59126	0.3762	0.489515	0.561954	0.264846	0.417384	0.676205
0.719737	0.446513	0.214392	0.184025	0.540461	0.492312	0.642351	0.38748
0.596257	0.393417	0.334425	0.417694	0.569965	0.530695	0.490813	0.566505
0.607636	0.339882	0.383386	0.428651	0.610377	0.391299	0.597135	0.318654
0.474576	0.739515	0.501768	0.453885	0.665321	0.696654	0.657386	0.76692
0.667324	0.668536	0.402259	0.727477	0.398273	0.397517	0.517078	0.886072
0.358932	0.595831		0.680259	0.538946	0.346889	0.489919	0.270189
0.626049	0.51846	0.718184	0.527648	0.837799	0.559597	0.370161	0.720523
0.664611	0.293574	0.863873	0.717603	0.552574	0.717346	0.595966	0.557824
0.491384	0.292952	0.398486	0.748086	0.615694	0.450398	0.470515	0.596116
0.450625	0.318038	0.257394	0.48281	0.574101	0.560293	0.400829	0.621693
0.647763	0.748505	0.578078	0.439518	0.63393	0.593192	0.41956	0.685886
0.393471	0.501781	0.475154	0.469053	0.613731	0.340438	0.398596	0.810864
0.775344	0.624371	0.503069	0.53768	0.611956	0.550167	0.676096	0.612679
0.440882	0.704429	0.402688	0.300999	0.543773	0.554704	0.516476	0.156361
0.750211	0.485061	0.347743	0.561387	0.358339	0.222498	0.450254	0.690768
0.79639	0.375623	0.514712	0.488594	0.53746	0.506812	0.515509	0.257718
0.741018	0.430357	0.522789	0.82422	0.646944	0.511705	0.531432	0.353522
0.702791	0.466147	0.423037	0.633606	0.499416	0.728771	0.4369	0.459902
0.404312	0.173618	0.449633	0.473387	0.355525	0.6369	0.337444	0.740615
0.855847	0.575973	0.473868	0.62759	0.497107	0.457828	0.607742	0.925435
0.596136	0.27199	0.362858	0.407108	0.571553	0.335233	0.44672	0.313732
0.557637	0.708078	0.476464	0.657474	0.571253	0.335187	0.514494	0.701418
0.520128	0.633951	0.423705	0.354573	0.545853	0.260897	0.506845	0.560963
0.762913	0.526107	0.534608	0.712962	0.652944	0.452947	0.415052	0.410661
0.62427	0.512679	0.487338	0.727061	0.505173	0.589049	0.448211	0.446899
0.548028	0.463642	0.504834	0.595588	0.476943	0.479747	0.520635	0.516188
0.455944	0.527792	0.550424	0.354163	0.604666	0.395587	0.490577	0.511028
0.51843	0.579747	0.418564	0.515177	0.831126	0.814092	0.383866	0.644264
0.850195	0.547355	0.438275	0.40106	0.43389	0.353575	0.62066	0.652908
0.59873	0.727607	0.293925	0.692654	0.614609	0.382114	0.628783	0.231429
0.612757	0.595891	0.45493	0.612207	0.42929	0.48828	0.806006	0.371824
0.695993	0.667089	0.485022	0.483624	0.478928	0.322804	0.35674	0.878107
0.726482	0.53393	0.359965	0.32718	0.88391	0.796457	0.471227	0.628398
0.763898	0.467019	0.402809	0.650895	0.310376	0.705501	0.579162	0.51121
0.412677	0.43551	0.420215	0.40922	0.387034	0.590678	0.461594	0.580654
0.516708	0.736319	0.66004	0.662272	0.614815	0.541678	0.468974	0.502365
0.570993	0.484885	0.4131	0.894245	0.376481	0.77326	0.433228	0.316179
0.786595	0.514952	0.406784	0.661791	0.720945	0.515709	0.390292	0.703609
0.309955	0.48106	0.527089	0.156264	0.563709	0.496619	0.46913	0.592399
0.892188	0.455956	0.524758	0.598703	0.601103	0.692723	0.504071	0.488251
0.630298	0.374263	0.392177	0.516545	0.469027	0.44126	0.430259	0.775345
0.574779	0.510071	0.575189	0.694316	0.598896	0.387233	0.170179	0.473442
0.565516	0.385768	0.310844	0.586852	0.505554	0.579681	0.63455	0.830194
0.614026	0.740983	0.39387	0.767118	0.64078	0.400702	0.662526	0.877525
0.576573	0.404	0.41139	0.41631	0.56217	0.571161	0.301328	0.308252
0.827109	0.610818	0.770643	0.467756	0.407143	0.410631	0.12155	0.898192
0.547445	0.453	0.48516	0.805667	0.608696	0.511565	0.385206	0.152061
0.641061	0.419872	0.368553	0.233945	0.780275	0.424202	0.721744	0.647138
0.589324	0.558089	0.385673	0.393029	0.506931	0.457029	0.534404	0.711662
0.583789	0.720906	0.594818	0.530607	0.359774	0.586108	0.692033	0.878632
0.356622	0.802525	0.404572	0.78794	0.708766	0.46167	0.653555	0.565384
0.892605	0.525707	0.369365	0.749641	0.549652	0.571227	0.431866	0.789167
0.402377	0.575396	0.445995	0.553173	0.18815	0.472187	0.426572	0.731959
0.552913	0.5916	0.502254	0.588027	0.784787	0.736598	0.670016	0.586178
0.657237	0.473488	0.325333	0.718999	0.629818	0.364997		0.9177
0.786521	0.561614	0.505371	0.679882	0.480912	0.791079	0.351462	0.610592
0.642105	0.37189	0.455999	0.608709	0.495863	0.564281	0.635699	0.874917
0.614879	0.740253	0.298061	0.380548	0.571602	0.758092	0.36198	0.876471
0.756363	0.504354	0.578248	0.320809	0.541657	0.621279	0.604206	0.801788
0.51155	0.386747	0.498472	0.268025	0.549399	0.458493	0.580744	0.84557
0.647582	0.513295	0.367596	0.87683	0.621699	0.401799	0.322396	0.700275
0.671708	0.520118	0.32924	0.514882	0.575481	0.46032	0.491961	0.630584
0.725469	0.518237	0.501728	0.741464	0.544255	0.3215	0.545653	0.906367
0.515692	0.623254	0.318062	0.549283	0.707368	0.191662	0.488819	0.479366
0.554802	0.487781	0.513869	0.668471	0.399027	0.659581	0.391708	0.443061
0.62919	0.588704	0.258895	0.693671	0.540308	0.429125	0.557979	0.823086
0.440395	0.492051	0.548542	0.75467	0.538138	0.243075	0.275088	0.570417
0.72133	0.465001	0.654601	0.587526	0.415094	0.621605	0.568526	0.696302
0.498886	0.560155	0.468331	0.272614	0.572495	0.282784	0.522838	0.7048
0.749063	0.221335	0.482335	0.605901	0.642151	0.445964	0.498257	0.871006
0.568062	0.653526	0.538159	0.526295	0.831201	0.78263	0.61375	0.468559
0.799481	0.606585	0.546652	0.856235	0.669383	0.51465	0.643044	0.501964
0.481654	0.541591	0.344489	0.455346	0.736558	0.7577	0.539048	0.48653
0.828278	0.653701	0.620596	0.588884	0.597338	0.582835	0.552933	0.172656
0.731436	0.257826	0.495986	0.529517	0.474318	0.583389	0.34152	0.532076
0.671227	0.496988	0.520609	0.635491	0.553727	0.438059	0.61142	0.764024
0.22868	0.539841	0.448376	0.615722	0.590023	0.572585	0.296841	0.813669
0.829613	0.461844	0.477738	0.496657	0.510722	0.476592	0.450863	0.869342
0.643805	0.35875	0.433272	0.771991	0.443497	0.513332	0.490962	0.222822
0.603987	0.457899	0.339586	0.838688	0.456398	0.755152	0.223203	0.82686
0.797743	0.770975	0.447324	0.776504	0.474322	0.653984	0.464736	0.64782
0.542096	0.325764	0.290481	0.30153	0.484425	0.729859	0.555103	0.578867
0.661871	0.331945	0.560281	0.795796	0.342084	0.345729	0.510117	0.89571
0.567737	0.352774	0.523988	0.909089	0.560998	0.687744	0.267744	0.866555
0.539682	0.609151	0.464525	0.617342	0.701822	0.551893	0.475824	0.398875
0.621956	0.681683	0.593514	0.583349	0.491436	0.417195	0.415175	0.487105
0.848507	0.559493	0.210486	0.568512	0.537174	0.610868	0.65539	0.801872
0.383329	0.529123	0.32884	0.857118	0.38629	0.553251	0.593302	0.708856
[truncated: 4,242 more rows]

## Sheet: Figure 4F
Veh	Veh+I	HF	HF+I	3610	3610+I	0357	0357+I
1.7341	3.79784	9.20859	1.34715	5.98417	1.79692	4.52029	2.38605
	3.86951	5.79208	1.75755	2.42627	1.49014	2.68779	5.39291
3.49783	1.69676	3.82132	2.72058	2.17222	1.77425	3.79858	2.78559
	4.17854	4.20609	1.37433	4.63208	2.05392	5.82625	3.80082
2.84421	1.55271	5.55629	3.14858	2.86236	1.90805	2.60702	5.35461
	2.17434	7.64767	2.57649	2.92002	2.04689	2.51636	2.60806
	1.26892	6.93469	1.63701	2.40096	2.21618	2.98795	4.6552
	0.974846	3.27649	1.54701	4.30246	2.11153	2.62756	2.52373
2.70343	1.60576	5.28082	3.18413	3.35336	4.23171	4.75943
4.73012	1.60021	10.3974	2.13211	3.22097	2.72835	5.47971	2.46734
	3.13818	5.64015	1.91072	7.58643	1.21297	3.65807	2.79807
3.34111	2.03023	4.44258	1.27756	3.95288	1.59615	8.20373	2.58397
2.91838	2.04822	10.407	2.29602	2.87181	1.87895	2.6078	5.97536
	2.35789	9.65219	2.03751	3.68957	1.71057	5.38626	2.70297
2.12527	2.18034		3.55124	5.91885	1.50043	2.93329	3.04347
1.9821	2.27094	3.47899	5.67456	3.08443	1.36082	5.17758
1.82518	2.1502		4.28893		1.75616	7.38614	1.92673
2.21595	2.02884		4.63187	1.88168	2.12157	4.46661	4.1468
4.71471	1.90747	5.09059	2.18768	2.30968	2.55972	7.0029	2.15952
2.6268	1.61342	3.79426	1.37938	2.56447	1.07065	2.65244	2.95552
3.41647	3.15727	3.04275	1.74301	5.53357	1.85313	5.66859	2.44427
5.99731		10.6047	3.19213	2.32015	1.27635	6.01888	2.09645
1.92463		3.72986	2.22932		0.998047		1.63209
2.00717	1.74153		2.52521	3.6049	1.28757	2.12857	3.17943
	2.73593				1.05832	2.79306	4.88002
	1.81526	4.45448	2.34402		1.42503	8.13222
	1.78548		0.902786		1.55685	7.59001	3.98373
	2.21485	4.75829	2.87842	3.99688	1.58899	4.10469	3.25816
4.23454	1.87272	2.00041	1.06918	3.05163	0.996696	5.69983	6.3147
2.99121	2.28783	9.16061	1.71776	2.82423	2.2268		2.45274
	2.83951	5.39956	3.27469	3.92039	1.32677	2.38591	1.84904
3.18782	1.60893	3.9431	2.63	3.01984	1.21417	4.27629	5.28453
3.62398	2.98307	12.6264	2.25437	2.88807	1.79167	3.29742	2.15132
3.37161	2.85982	4.90089	1.87532	6.16627	1.43896	2.76524	2.31324
	2.94667	5.59132	5.47772	3.26019	1.06155	2.2762	2.24919
	3.56474	4.87357	1.27738	3.0939	1.18913	8.32143
5.01163	4.28242	5.45631	2.48372	2.46173	1.57221	2.66422	3.41891
4.15487	1.57777	11.0735		3.27876	1.21713	4.8264	4.38885
5.62687	3.02351	8.71002	2.54781	2.22836	1.49456	4.13928	2.94519
	1.52342	10.8143	1.35246	4.9958	1.16309	4.38583	4.76982
	2.08116	3.41055	3.26508	3.74279	2.27634	2.0052	2.23184
	3.13136	13.9175	1.95639		1.43633	2.92628	2.94054
3.03809	2.04808		1.0603	2.07141	1.14513	4.95886	5.59309
	1.39109			4.68794	1.94221	4.55991	3.17534
3.94705	1.72919		3.22459	2.23769	2.33233	2.57793	2.18983
	1.57533	3.20896	1.60004	2.79813	1.31797	2.82132	3.4883
2.4419	5.45634		2.65546	2.96893	1.06044	5.48656	2.28664
	2.78812		1.63553	6.79027	1.87395	2.62811	4.22226
3.93947	1.95455	3.25337	1.59856		2.0963	2.90202	2.38489
2.94348	2.83853	5.41636	3.76244	6.32275	1.43215	2.75612	4.06695
2.14638		6.55015	1.2028		1.82787	5.7505	2.89717
4.1166	1.23864	7.91862	3.67848	2.50507	2.38957	2.32521	2.77733
	2.17667	3.67423	1.63029	3.91848	0.979897	2.45674	1.96285
3.43656		3.07605	2.36066	3.81136	2.22123	2.60016	6.40408
2.94421	1.26805	3.06491	2.10256	3.2671	3.61635	4.53411	2.76048
4.16253	1.74784	9.27404		2.07822	1.30735	7.67436	5.19621
4.54165	1.56152		2.05898	2.27884	1.24343	3.37546	1.74521
3.7978	4.62624	3.61864	1.28067	2.40542	2.93045	2.02833	2.77083
2.12046	3.28028	3.93339	5.36101	3.38669	1.97745	2.69463	3.90605
5.91161	1.97577	4.33115	2.31783	6.07484	1.68654	2.55254	2.52096
3.26061	1.2654	3.07118	2.47057	3.09266	1.83118	2.04726	1.89447
2.89152	2.01988	6.41508	2.33298	2.47587	1.19525	3.41727	7.23572
4.30029	2.30998	5.9337	2.12685	3.19057	1.27567	6.87749	6.09071
	3.63132		1.77426	4.16298	3.30174	3.6104
2.19328	2.99431	8.84673	0.842631	4.10114	1.88383	3.4467	1.80248
2.46402	2.53093	6.21944	1.63269		0.993532	5.35785	4.93155
2.6156	1.65607	3.06117	2.21549	2.07217		2.869	1.99265
2.99877	1.43501	3.40634	1.15038	3.69857	1.44235		2.24654
	1.55464	5.29233	1.31553	1.98603	2.56164	2.86521	3.16349
2.98054	2.20298		1.40164	6.77759	4.5166	2.84538	1.4079
2.73712	1.30073	4.39066	3.08124	3.27086	1.92493	3.02266	3.03733
2.63605	2.04099	3.48253	2.38071	2.04292	1.5485	3.6083	1.86989
2.31418	1.92619	3.51398	1.26151	1.64666	1.41775	6.19611	2.8457
	2.69209	2.91491	1.24053	3.42128	1.38347	3.27092	2.54879
	2.21393		1.42309	2.96198	1.13319	2.79483	2.10806
3.52891	2.72579	12.5078		2.26373	2.35875		2.02826
3.14299	2.32641	4.58553	2.00755	2.3716	3.64433	3.25046	3.31422
1.54095		8.23054	2.54924	2.03791	1.95401	2.32517	1.56513
2.09693	2.97012		4.07518	6.87837	1.70504	3.76465	1.99854
2.20009	2.2337	4.29	1.60915	6.11972	3.89802	2.6184
1.72404	3.33747	7.20251	3.00964	5.59526	1.94689	2.28972	6.54358
0.924423	1.32732	6.912	1.18548	2.12376	1.49641	2.38601	4.16341
1.62349	2.06963	5.74403	1.56042	2.63363	1.62226	2.35792	1.93158
3.13826	4.74218	3.732	1.44583	2.00647	2.03822	2.57178	3.40998
2.56724	1.78219	3.0266	1.24369	5.68317	1.27876	3.00093	2.5834
	2.89885	2.93145	1.7124	3.47176	1.97364	3.64957	3.80217
1.64034	3.85568	2.63696	2.85954	2.36253	1.91047	4.19518	4.66289
1.50566	3.1037	5.25259	1.36763	4.48894	1.55981	2.85932	4.49018
2.62126	1.87593	2.64442	2.81304	4.20876	1.52694	3.39785	2.88017
1.49385	2.91089	5.8055	1.14516	2.81641	3.50914	2.25853	1.86134
1.10184	2.99055	13.4409	1.28225	2.77911	2.81455	2.61351	3.31943
2.56126	2.48838	6.17439	3.40141	2.58273	1.27675	4.209	2.7426
1.79346	2.05677	2.93236	1.18086	2.09369	1.77571	4.74959	1.97102
2.26834	2.52752	3.07474	5.19355	5.88771	0.9461	4.52394	2.22362
1.61281	1.67195		1.43801	3.88451	3.08628	2.78674	2.4202
4.12056	4.2034	2.59782	1.7524	2.46692	1.09649	2.09503
3.81876		2.63224	2.31382	2.21415	2.30076	3.37559	2.58623
5.83848	3.02824	4.4055	1.16215	2.7277	1.04205	3.22656	1.79086
1.78662	1.60376	6.41562	1.14011		1.37821	3.07814	1.96785
1.99916	4.99059	6.55976	1.30235	3.77057	1.73386	2.19616	3.83261
2.39952			1.69456	4.04257	1.35017	2.83442	2.49308
1.58104	4.88158	5.26353	1.10589	2.10129	1.45349	2.83928	1.71564
3.03644	1.89729	3.59196	4.73648	4.19928	1.31778	2.59917	1.16425
1.13048	2.82637	9.35701	2.12526	1.9541	1.98576	2.86192
2.32847	2.03626	9.88116		1.45885	1.27742	2.67398	3.40806
1.37628	3.26587	4.27605	1.1874	6.8201	2.11751	6.29453	7.28992
2.54425	2.23547	3.7456	3.20367	7.93373	1.71447	4.20273	2.23171
1.88194	1.37255	6.23985		2.05061	1.54045	2.40744	5.09705
1.71901		5.16682	2.89417	2.59116	4.07962	6.91022	2.09287
1.62598	3.05643		2.86195	2.11441	1.14973	3.31573	3.17244
0.950912	1.94871			6.23697	1.22163	3.44229	2.12715
2.6389	1.58489	6.5961	2.35848	2.06977	1.67953	2.5846	2.34283
4.38968	2.32137	7.79272	1.10195		1.54652	2.16375	2.9534
1.19174	1.94754		3.9006	3.82205	1.29251		2.41364
2.36684		11.148	2.59693	3.50714	1.35457	2.42221	3.7782
1.89445	2.37158	3.50885	4.53156	1.55111	1.23959	2.08688	2.91424
3.37852	2.10243	2.71501	1.87691	2.10922	3.98512	4.24774	1.74795
1.09557	2.27406		1.36114	5.09569	3.04525	2.96539	2.75902
1.33524	1.44679	12.0303	4.25751	2.14966	5.11146	3.15309	3.03886
4.13808	2.26937	6.4029	1.79064		0.991838	4.53024	3.31844
0.980438	4.32759	6.37005	1.81606	5.01683	1.21371	2.90753	2.85401
1.20911	4.81797		1.2572	2.41282	1.92691	4.67442	1.92563
1.70668		4.92412	4.318	2.50615	1.70844	2.59698	2.89159
1.78713	2.19934	9.58437	2.53802		1.55669	3.05846	6.08671
3.50128	3.58018		1.47563	4.06476	1.52234	4.118	2.49516
1.123	4.50954	2.62983	1.69162		1.90001	3.52212	3.15862
3.77473	2.3866	7.31468	1.99509	2.92685	1.52957	3.12699	1.53851
1.60479	2.70132	3.85954	3.05763	2.62151	1.48648	2.60585	2.82181
1.40028	2.62788	2.98103	1.86331	4.32829	2.77097	3.93069	4.68786
1.93328	2.03807	4.66177	2.51814	3.77397	2.97194	2.6163	2.6396
2.11401	2.32876	2.6174		6.29532	1.70905	3.272	2.12959
1.53035	1.7895	6.81345	1.84816	1.99258	3.67005		1.64858
2.84574	2.65594	7.1469	4.93543	2.24067	1.86743	4.41188	1.63983
1.18417	1.7919	3.53993	3.85181	2.71638	3.72221	3.29649	3.51563
4.90555	2.77184	3.41823	2.07719	6.89326	2.31319	8.76154
1.70461	5.74023		2.19816	1.685	1.69135	6.69434	2.50652
3.87186	1.5275	14.3347	1.56046		2.1399	4.23712	2.23499
2.0082	1.90579	2.76855	1.97411	1.79886	3.65096	8.26895	4.11916
2.717	1.90736	6.07018	2.27885		2.19476	4.15373	2.05316
	1.3763	3.22843	1.42722	4.24361	2.20311	2.37972	2.2164
1.89451	2.84446	3.25367	1.25605	6.49146	1.4601	4.61136	1.78638
2.29634	3.67181	3.48157	2.7116	3.69075		4.02132	3.69146
4.80376	2.70109	2.83872	1.3052	5.20648	2.62672	5.01561	3.17159
2.64686	1.75118		3.21104	2.12395	1.6279	4.21924	4.72754
1.94178		5.02915		1.93217	1.10498	3.45683
3.00386	2.18656	5.32483	1.87254	2.70831	3.03812		1.79891
0.933868	3.40775	3.45958	2.22681	2.00888	1.85211	7.03178
1.80809	3.04786		4.67722	2.08864	2.42868	4.7363	7.17564
1.96621	2.32401		2.62274	4.96649	2.11295	3.18826	1.41255
5.03246	3.07629		1.95319	3.75949	1.24074	7.04884	3.12189
2.05315		4.10805		3.47307	2.23087	3.08348	2.20972
3.31956	1.11169		2.18916	1.91659	1.96729	5.1382	2.81224
3.88601	2.9081	2.92948	1.10662	2.34622	2.79991	4.36621	1.92999
1.68295	1.74095	3.51937	5.58968	7.73717	1.7756	7.47574
1.50439	2.3517	4.57785	3.79953	2.83126	3.28838	3.04509	5.81035
	1.56488	2.81961	1.44958	2.17696	1.56562	2.52976	1.56216
4.77385	1.57057	4.97945	2.30285	1.82987	5.4042
1.66952	1.15327	8.3826	1.77395	3.60779	1.29369	4.19856
1.46783	1.89429	3.65402	3.66163	4.29037	3.42953	4.45073	3.60417
	3.28308	3.68161	2.03777	2.40077	2.03276	6.19765	1.47989
3.87907	1.24522		2.2671		2.02258	2.88733	6.55
4.0741	0.925114	3.60657	5.59685	2.69746	4.15836	3.85875	2.05135
1.21481	1.49271	4.18408	3.06628	2.18009	1.30142		2.31113
1.63802	3.99748	7.59521	1.31597	5.63162	4.21752	4.26487
2.37878	2.40579	2.88822	1.8108	3.37671	3.12113	6.20181	3.14725
2.34126	1.6004	4.46548	2.20002		1.67007	4.78405	5.87302
4.04101	1.1308	5.29507	3.38528	2.56047	1.47125	3.11974
4.0788	2.1115	4.45461	4.14871	2.60869	1.58813	4.27779	1.88633
1.89524	1.16516	8.73698	3.10762	4.03335	1.4351	6.05411	2.19102
4.21751		9.55319		4.42222	1.93272	3.4428
	4.62099	3.48333	1.61448	2.30878	2.6512	2.59302	5.47523
4.11737	2.16935		1.62953	3.37106	1.40533	2.56359
3.43486	1.65733	3.34272	2.27863	4.46269	1.04994	2.82687	5.74007
2.95725	1.75769	7.66992	3.92256	2.16808	1.52454	2.74251	2.66522
1.77145	5.38396	6.78546	2.2678	5.83762	2.22305	6.3064	3.288
3.79904	1.34789	11.3005	1.49316	4.00153	5.25429	4.13959	2.1843
3.28395		6.96722	1.62002	2.86867	2.12759	6.20956	1.5914
		3.14453	1.39367	3.3856	2.40088		1.80121
2.41544	1.88081			5.7187	1.12303	3.08281	2.16581
	2.29338	3.4062		4.51781	1.75708	2.45516
2.28667	1.38438	11.6172	1.94691	2.49449	2.67136	4.79927	1.87383
	4.84551	9.14263	1.79171	2.68923	2.31855	4.2478	7.2056
1.69324	1.09917		1.54336	2.12301	2.13352	4.36171	2.47649
1.98817	1.48853	4.67305	3.64262		1.16793	2.58055	3.11053
2.50969	3.31499	4.39814	2.68977	4.28339	5.1077	2.61427	2.13913
2.93002	1.05083	5.38855	1.78684	1.72769	3.42539	7.25294	6.62727
1.85615	1.53238	2.9356	3.03867	2.53205	5.09686	3.15042	1.88583
1.99524	1.82129	9.23924	2.79884	2.31215	1.01917	2.93189	6.68361
1.25343	1.33823	3.40528	2.53279	2.15361	3.55067	2.72887	2.70968
1.39258	1.7685	3.84647	5.75845	6.31659	2.90391	5.07783	6.36747
3.12215	3.27054	13.7041	1.59177	4.22536	1.49951	4.00544	3.42373
2.28222	2.09422		1.94395	2.12297	1.7651	2.62685	2.28478
1.45725	1.62443	5.6711	1.53551	2.84685	1.97859	3.86214
2.17062	0.914579	7.41204	1.53082	6.05347	5.03078	4.08229	4.22195
2.46825	1.71341	4.12315	3.13075	3.25691	1.84642	2.47559	1.69552
1.72641	1.77818	7.74339	2.24839	3.05497	2.00487		5.2646
1.89777	1.63024	3.01787	1.31931	2.76713	0.947379	4.99207	1.70845
1.71078		5.85974	2.13903	6.10448	2.70271
1.36119	1.91695	3.39083	1.6979	3.8532	1.72646	3.60746
1.57008	1.26313	6.72	3.05684	2.30079	1.28494	3.72328	2.32817
1.43066	1.86475	5.00525	1.55662	2.10766	2.8197	2.59613	2.234
1.41537	1.62569		1.35077	2.35267	3.16093		2.28288
2.50401	2.00411	5.43417	1.61222		2.18857	5.12296	1.7832
3.67503	1.69164	3.241	3.2816	1.61845	1.89407	5.66602	1.8788
4.06299	1.58323	3.66425	1.71165	1.599	2.29404	5.62552	1.88176
1.03985	3.06746		2.40935		2.12248	2.88529	3.58661
1.33644		9.54576	3.0947	2.04638	3.67783	2.73146	6.17752
1.67789	1.3333	13.1797	1.42674	2.38469	3.34206	5.23391	2.0061
2.24309	3.55956	4.32028	2.2178	2.4004	2.19905	3.97211	6.10539
1.15136	4.23636	3.12397	3.65028	1.92985	0.953354	5.50311	1.7559
4.1931	1.04927	10.2041	2.16415	2.36412	2.48232	4.53839	3.91088
2.55924	3.61291	4.38082	2.56796	4.03899		2.72943	5.04512
2.09596	2.89957	5.36303	2.47975	4.14341	2.16731	2.63067	2.38316
1.31647		3.41121	1.70739	2.09146	3.07901	2.80072	7.24177
1.32715	2.65514		2.41567	4.2646	1.14545	2.9668	1.8602
2.93259	2.58344	3.10184		6.03966	1.50725	2.61521	3.00945
1.31773	1.88351	3.81584	3.20916	2.26762	1.43826	2.60648	2.70658
2.66573	1.4083	3.44768	1.67054	2.54666	1.19428	9.20122	6.95362
1.50548	1.51619	2.82095	3.01665		1.26331
1.02664	1.18763	3.9864	1.6042	4.79578	1.9579	2.4033	2.5308
1.57024	2.27475	2.87971	2.48027	1.75106	1.45335
1.14068	2.80556		2.50216	2.66846	1.36284	2.52847	2.3883
1.40861	1.58371	3.58932	3.68594	3.24495	1.15997		2.12103
2.68425	2.37222	6.60108	2.13192	2.92398	1.44477	2.44005	3.02742
1.08064	2.99521	7.22	2.20177	2.56035	2.14456	2.86841	3.23053
1.51864	1.24577	3.65643	5.20711	2.50605	4.27737	5.51346	1.80666
1.86951		2.95119	3.12291	4.12248	3.07625	2.98135	5.11388
1.14268	1.85169	5.92606	2.28795	2.07236	4.89219	7.59233	4.02958
1.64833		6.78003	1.94266	3.92434	3.52152	3.45675	3.48442
1.17664	3.44136	9.47316	1.98934	4.50061	1.83314	1.94402	1.87551
2.01876	1.24099	5.64912	1.39161	4.44983	1.02715	6.34884	4.56143
3.36238	2.20012	6.31217	1.65123	3.36845	2.2112	3.99867	2.02445
1.33535	1.22031	12.7189	2.02165	2.84447	5.25024		3.96836
1.64243	3.05244	12.3246	3.49104	2.65761	3.71093	3.23687	3.5428
1.37829	2.50257	3.38372	2.45166	2.47781	1.36879	8.89023	4.22758
1.21971	1.31929	3.80476	2.42568		1.87081	6.04997	1.70306
1.79945	1.68537	4.9012	1.92585	2.37349	1.67569	5.91637	2.31098
2.58713	1.55523	9.75478	1.38583	2.57464	1.85217	5.97559	2.54521
2.8736	1.1815	3.99284	1.58957	2.76494	5.4142	4.23911	1.63953
3.44063	1.5583	6.64634	5.00926		3.45017	3.29362	1.30766
2.28047	0.908798		1.61764	3.17058	2.42957	8.05058	2.65109
1.45898	1.75452	7.35943	3.03585	2.36517	3.31345	3.05956	2.24252
2.9157	1.16383	6.23923	3.86147	4.45094	1.57726	6.78521	2.02674
2.6576	2.05866	3.46184	5.39685	2.14413	0.973938	5.67288	5.50081
1.32887	1.16039	7.15701	1.62848	2.11868	1.98427	2.73929	5.08259
2.80824	0.952852		2.69942	2.11951	4.26114	2.79396	5.56797
1.32771	1.91489	8.76392	2.52166	1.75264	0.986298		5.86728
2.0673	1.22953		1.5811	3.04141	2.11081	3.70132	2.42115
2.64568	1.69643		2.30217	4.48946	2.08612	1.93328
3.43051	1.62403	4.04233	1.92959	3.23484	3.24724	5.84435	1.94113
4.21422	1.51953	11.9404	2.69759	4.9704	1.36021	3.17147	3.29276
5.09495	1.24555	4.77774	2.74164	4.83025	1.07742	2.78409	3.12057
1.18114	1.74628	11.0086	2.06643	2.8725	1.48456	5.89752	1.96571
2.21095	2.29136	3.23296	1.53499	7.59912	1.35007	4.14178	2.34544
1.35893	1.52442	3.55123	2.38283		2.02201	2.05226	2.63105
3.88403	1.77779	9.04916	1.49465	3.12204	2.66041	2.65195	2.22987
1.92669	0.882149	9.99879	2.25443	3.64717	1.30251	3.13013	2.73482
1.57141	1.31056		3.5396	4.3998	1.6304	2.62315
2.59673	1.17691	3.45109	2.27877	4.21122		3.60639	2.63042
3.75803	1.26103		2.13314	5.02888	2.48215	2.63286	2.61995
1.17339	1.50956	4.89764	2.40938	3.25673	3.04951	3.45585	2.68894
1.94147	1.71581	5.95967	4.90305	6.59279	2.31349	2.00743	2.5369
1.77204	1.69739	5.85257	2.17087	3.00774	1.78996	2.36179	1.67297
1.89183	2.59563	5.41119	1.96483	3.46138	1.52172	2.65984	2.14659
1.18026	1.17504	2.60075	2.32171	2.27076	1.56549	2.88025	3.93824
3.67733	1.19594	7.02196	2.23116	2.30373	1.38381	2.5654	1.68735
4.52347	1.28431	5.1683	1.20906	6.75642	3.45159	2.55064	2.64708
2.67386	1.53532	4.47342	3.03342		1.76653	3.45523
1.79122	1.43646	5.47851	2.0156	2.976		3.03141	2.84584
	1.17999	5.85995	1.5287	1.9102	3.62173	3.27383	2.24467
2.59101	2.60323	5.65552	5.76296	2.57704	1.99922	3.6707	2.31577
1.8825	4.3231	13.034	1.96021	2.3596	1.51846	2.87136	2.2623
1.71541	1.0757	9.91864	1.62961		2.25229	3.44886	3.14339
2.65204	2.39716	5.98511	2.14072	2.4942	1.11743		5.39647
1.40604	2.65765	8.35364		7.43631	2.56226	4.80746	2.65174
3.46778	2.02986	3.48681	1.43835	3.50042	2.65997	9.21533	3.10691
1.79925	1.18366			6.52582	1.99171	2.72705	3.17416
3.82444	1.25041	5.57828	2.27148	3.83854	2.71164	3.8701	2.68471
2.06952	1.12299		4.75911	5.57164	5.06493	3.49707	3.16171
3.89353	2.12914	3.93804	2.5121	3.43645	3.52408	2.14863	4.95881
2.48891	2.82848		3.80724	2.22984	1.22354	2.8884	3.37604
3.31191	2.67902	8.47128	1.76021	6.68703	1.55778	3.11899
3.98836	3.29707	4.73802	2.67038	4.29544	5.09985	2.54284	4.53818
2.89264	1.94366	4.07439	2.13582	4.62434	1.31609	3.66285	4.31873
2.12057	3.13229		1.96505	7.65392	4.19157	2.73268	4.58149
1.88212	2.39257	7.67816	1.84342	3.72744	1.26225	4.98344	4.71156
1.96523	1.60446	3.11649	3.99652	2.64438	4.17545		4.63541
1.14719	3.09604	7.88603	1.56189	2.24711	1.81988	3.05964	2.14783
2.0032	2.48349	2.94775	2.11054	2.20539	1.93665	3.09187
3.65719	2.00758	2.38425	5.28676	1.74806	1.99287	4.54642	2.52864
1.24435		6.37437	1.82507	2.54514	1.37881	4.82076
2.20059	1.55848	3.22478	1.82742		3.13794	4.81204
	2.1272	3.67213	1.62985	5.40291	2.77338	3.13693	2.34044
5.6932	2.2699	3.46632	1.89258		2.37084	3.52095	1.82532
2.908	1.82815	13.4028	2.05074	2.51842	3.01504	2.83166	1.38933
1.8295	2.61396	2.81396	2.18938	2.40535	3.28932	2.67645	3.27071
2.44663	1.54286	4.39133	2.71083		2.82798	3.9986	4.50881
1.84818	2.41219	3.84424	2.33123	3.78691	4.53273	5.94891	3.60762
3.46993		8.97252	1.95607	3.61349	1.21009	2.46222	3.25659
3.05889	1.9693	5.42458	5.62588	3.37035	1.04688	8.20721	1.85674
5.43128	1.74216	3.34979	4.99281	2.21587	4.52038	5.13477
2.13697	3.25091	7.78738	1.85866	6.91341	1.20826	2.6485	1.80535
1.7442	2.42285	14.8246	1.81733	3.84022	4.80816	8.06997	1.16342
	4.03637	5.32986	3.86871	2.01467	2.07817	3.49154	2.14053
1.19428	2.15062		3.59637		3.06727		6.10367
2.82063	2.27872	7.08604	2.09735	3.00324	2.40231		1.89933
4.3812	1.82186	5.9593	1.50021	5.5493	1.6496		2.39976
1.32211	2.20204	7.42503	2.48413	4.85806	2.13964	2.27591	1.8158
1.98901	1.40453		1.97812	2.4052	3.44607	3.92471
3.75091	4.83378	3.34001	2.07149	3.54951	1.15503	5.67757	4.01343
1.94006	2.19094		1.55786	2.32171	2.18757	3.90189	3.40353
1.61094	2.30866	7.76544	2.1075	3.91738	2.27711	2.95156	3.61211
1.29074	2.52153	2.9345	1.86876	4.75232	1.81953	2.90694	3.22718
1.07139	1.49342	2.96973	2.33722	4.48845	2.05156	2.44142	2.60409
1.49245		8.26875	1.43525	2.33412	1.4938	5.08313	2.37822
3.80056	2.53047	5.84717	5.2177	2.72318	1.77976	2.81372	4.82314
3.21376	1.47426	8.62599	3.75676	2.46086	1.5673	4.70102	4.39062
	3.66595	6.64154			2.34028		1.82221
2.5396	1.93344	3.11479	2.45338	2.75729	1.52717	3.95862	2.24489
2.51345	3.08802	11.2258	3.38287	3.73253	1.62428	4.42819	2.98656
1.33011	2.24204	4.39679	1.83952	4.46572	1.57384		2.03231
1.52537	1.5963	13.859	2.52141	4.07333	1.40976	7.61771	2.47
3.64322	1.78609	11.8881	3.51181	2.24226	2.09869	8.01015	1.72564
2.86687	1.42156	6.38418	2.52433	3.02492	2.44801	3.12382	2.05477
1.43652	2.11784	4.50702	1.98102		3.61735	2.70934	3.15993
	1.82787	4.45894	2.73865	5.28997	3.9401	3.99515	7.05803
	5.34725	4.55649	3.03858	1.7613	1.60303	4.2411	3.41724
	2.73981	10.4394	2.14308		1.34192	4.29056	5.07417
1.4195	1.57913	3.90285	3.20686		1.60043	5.55801	2.03439
3.3165	1.43749	3.10631	3.77315	3.50361	2.37329	4.62175	1.80344
1.8278	5.34714		2.1868	3.58142	1.70375	3.52864	1.74245
1.54026	1.29588	7.05492	4.35562	3.12621	1.44692	9.14468	2.37881
1.36233	2.02563	7.33741	2.54149	5.55391	3.42137		1.46738
1.54067	4.77237	14.0531	1.12215	4.04788	2.75642	8.01695	3.00815
2.73654	2.03341		1.6254	4.46442	1.97134	3.10437	1.81749
3.54207	2.42196	3.09419	2.93421	2.14235	2.05777	6.54413	1.97746
3.61275	3.22009	7.53087	3.12534	2.64716	2.97358	3.84336	4.22918
	1.82697	3.88645	3.04225	3.16991	4.69939	2.96013	2.79199
1.54652	3.83446	10.733	4.29564	4.36384	1.27764		5.43259
1.61497		3.44976	3.54409	5.85341	2.7168	3.56741	1.81131
2.98405	2.82514	4.03299	2.96774	4.8237	2.03421	3.52011	3.23085
1.39337		7.16931		2.48618	3.41326	3.38414	2.21108
4.91055	2.10255	3.89179	3.08535	3.98463	1.72498		1.8138
2.1839	2.20784	13.1956	3.16906		1.68632	3.48354	3.15833
1.62001	1.91759	3.57068	3.79718	6.42683	1.87594	6.22165
1.53692	2.41794	3.60646			1.20417	3.63166	2.65231
1.52046	1.90041	4.47409	3.15727		1.56532		4.2912
2.1821	2.32188	3.26134	3.8437	3.71986	2.70024	7.94003	1.99634
1.68373	2.33667	3.79977	3.22512	2.655	1.39134	2.67494	1.87967
6.01779	1.3178	2.97281	2.05748	3.06585	1.39433	3.1345	4.23682
1.85179	2.54887	6.85402	2.28346	3.50912	1.90302	4.38503	4.83354
1.04198	1.01636	12.5591		7.88429	1.1755	3.48571
1.05949	2.05289	4.73872	3.08159	4.3911	1.25552		1.63819
3.10893	1.63684	3.38942	2.68225	5.28882	2.05809	4.06384	2.10173
5.81102	1.26521	5.14191	2.27946	1.94962	4.10091	8.15967	6.66408
	1.54253	3.7648	4.22925		1.57104	3.09001	2.35086
1.29758	2.68997	5.03384		5.14881	1.5028	3.57366	3.09529
4.62366	1.26678	3.92139	5.26665	3.34113	3.33858	3.15964	4.59341
1.51122	1.94721	4.91022	1.68226	2.17788	2.98393	8.95276	2.26739
2.85048	3.12662	3.42548	2.24393	2.2411	0.978924	2.26989	2.48895
2.726	3.7428		4.1023		1.44312	3.16886
2.47881	1.14912	9.67133	4.32919	2.08254	1.53165	4.55516	1.89341
2.76521	1.76169	8.18781	1.84785	2.93294	1.23758	4.09205	2.74944
3.61191	2.62399		2.39483	3.83928	4.69698	4.86279	2.84983
1.80421	2.12787	5.08627	2.94032	2.93457	1.67279		5.33047
1.7104	3.78949		3.80573	4.4368	1.24639
	3.93866	8.31923	4.16872	2.55674	1.2487	3.17116	2.2094
4.10857	1.70665	5.29214	2.55444	3.73621	1.24014	9.40308	3.18755
1.43953	3.74103	6.97385	2.44788	6.39384	4.86685	3.21318	3.07419
1.48197	2.24899		1.49969	2.23186	2.51388	6.12561	2.22081
1.71697	2.82001	3.96378	1.80476	3.61212	1.67178	3.70795	1.72005
1.41523	2.33179		1.93268		3.36737	4.07587	2.9746
1.65163	1.80035	4.4665	1.66918	2.05511	1.14994		2.9012
5.73364	2.86251	3.35923	3.14287	6.11002	1.64908	2.95331	1.6454
3.14445	1.27518	3.10586	6.02868	4.13442	1.63752	2.81386	4.86951
1.24871	2.72889		1.70224	2.91856	1.22302	2.80424	1.72085
1.74971	1.60312	6.98952	1.54145	3.60796	1.11107	3.02353	2.35751
1.82552	1.36274	5.72448	2.94624		0.984447	3.22962	2.02969
1.52574	3.04019		1.49465	2.60147	1.51148	2.94757	3.34691
2.75038	1.24464	4.88923	1.75112		2.52213	4.17387	2.07221
	2.11057		2.33062	2.15971	1.52283	4.23637	2.03901
4.31068	1.82279		1.979	6.68044	1.53984	2.6236	2.46258
	1.52981	6.58802	2.27504	2.57326	1.50428	2.65938	1.80076
1.94961	2.86414	2.86513	5.01167	1.54028	2.24463	3.34038	2.51154
2.34793	1.43669	8.96685	1.35085	3.76969	1.29092	4.44511	1.88888
1.98146	1.80027		3.07706	1.90891	1.52891	5.1333	3.50535
1.17139	1.43764	4.8354	2.5819	2.23486	1.73206	7.02988	3.51853
3.21884	1.37169	6.80973	2.37466	1.60194	2.85416	8.0369	4.05359
1.90763	2.86201	3.65683	2.41847	3.67285	2.58733	3.99396	2.42119
3.9864	2.03273		2.52832		1.10745
2.04797	1.31518	8.36267	2.03927	7.67886	2.26233	3.5873	3.50999
1.37083	1.73816	4.36005	2.81969	1.36737	1.95091	2.55322	4.00021
	1.52171	3.4611	3.49461	2.83472	3.03129	2.16049	3.25188
1.87202		12.5173	2.17186		1.73209		3.19023
1.93446	1.28006	4.92421	1.43918	3.37153	1.6633	2.80833	2.7143
3.64881	1.68982		2.24755		4.10236	2.50804	2.14723
3.05607	2.04689		1.82336	2.43289	2.02355		2.13138
2.07893	2.3483	14.4023	3.12361	2.53728	1.96056	6.00908	2.30936
1.9017	1.51973	4.01536		4.08152	1.80398	2.765	2.20932
1.84881	2.29063	3.95286	4.88612	2.85559	2.09184	5.15675	2.78889
2.20027	1.49432		4.02644	2.92964	1.63781	5.14292	2.69112
	3.58401		2.42351	2.1615	2.44212	5.1597	3.26301
3.47597	1.46744		2.64062	1.98232	3.16469	5.78166	2.38347
2.58379	1.83028		3.59251	4.82171	1.20097	3.39479	1.91722
2.08581	2.30134	3.56696	2.12586	7.20398	1.91429	6.44646
2.98019	1.81317	8.94141	2.36748		1.63948		2.41006
5.04306	2.02608	3.53082	5.15982	1.47753	2.60723	4.33067	3.76723
1.60833	1.37092	4.15055	1.76399	2.22812	1.65757	4.28935	2.14289
1.43257	1.46565		1.76897	2.16579	1.86515	3.39279
1.90552	1.41869	5.40398	4.01672	1.57197	1.19173	2.82797	5.51495
2.55064	1.38418	3.92107	1.81823	2.51096	1.51705	5.17418	2.40838
1.60472	1.46046	6.42076	1.78674	4.75705	2.09577	3.46136
2.7546	1.54848	2.90948	2.50522	2.62858	1.84518	5.72104
5.31296	2.12914		2.45948	2.19854	2.07332	2.23264	2.32355
1.3906	1.28336	3.45576	2.93233	2.63565	3.19802	4.15482	1.31734
2.30997	2.02481		2.80487		1.67327	6.11183	1.93872
2.58878	1.92089	9.298	1.60605	3.34948	1.81367	7.64636	2.45624
2.3965	1.92549	5.59404	3.56696	2.39861	1.46928	6.41054	6.14012
1.19531	1.64511		1.52039	2.0602	3.60791	4.34987
2.43702	1.75198	10.2089	1.79837	2.45088	2.35566	5.27753	6.59464
1.85966	2.00039	3.34104	1.73182	3.33556	2.21688		2.46522
3.89144	2.21691	7.08688	2.19535	2.28916	1.47436		1.87135
2.24734	1.8261		3.53518	3.25257	1.42234	3.15047	4.82129
4.3839	1.59885	4.08918	2.04988	2.23547	1.24792	2.71175	2.35387
2.24813	2.16278	3.28008	3.42912	2.32501	2.24499	2.17355	1.77882
1.28087	2.66209	10.0468	1.4565	3.06416	2.16931	2.88629	2.55904
2.0627	2.04633	5.72811	3.73151	4.47822	1.31258	5.67099	5.83829
2.93551	2.59845	3.16944	1.9178	5.38342	1.62719	2.65098	1.96752
5.28067	3.04688	9.08371	2.08837	6.90945	1.80903		1.12173
2.93806	3.26866	7.04836	2.98496	6.13902	1.39871
2.55236	3.28452	5.77863	2.27681	3.65342	1.08291	1.90966	6.11163
4.70946	1.43726	3.40061	5.21739	3.07003	1.1712	3.51962
1.59783	1.54424	3.5327	4.03152	2.30347	2.03172	6.60136	3.51859
1.96413	1.59032	3.34953	2.54478	2.08808	2.41019	6.40648	3.02146
2.96825	2.1069	5.39265	1.6494	3.85282	1.17747	3.2253	1.93156
2.40721	1.77634	3.8639	1.91619	2.18546	1.31081	4.70349	1.40529
2.78974	1.14745	3.14473	2.1078	2.09218	1.78775	2.07718	1.96149
2.33727	1.17371	4.16758	2.31424	2.28123	1.57637	2.11625	4.33292
3.72558	1.779	6.01363	2.73714	4.74178	1.57092	3.05511	2.72375
1.45985	1.75878	4.17957	1.56162	2.23401	1.66284	4.91406	2.61249
1.57183	1.96923	3.23659	3.66039	2.88194	4.15007	2.50591	1.25681
4.93126	3.03823	3.61466	2.83258	2.94593	2.88216	6.40269	4.59536
5.59068	1.02855	3.04696	2.5506	1.88775	3.15318	7.43234	2.17524
3.017	2.96747	12.7808	2.24924	1.68555	1.6553		2.58943
1.57767	2.54379	7.10388	2.07288	3.37204	1.74583	6.34276	1.65125
1.83693	3.21887	12.3677	2.41196	4.67522	1.60225		2.93515
2.84881	1.57849	15.2832	1.48368	3.46657	2.16154	2.24596	1.99381
1.39628	2.63457	3.45037	2.49746	2.72333	2.43018	7.5489	1.69692
4.2539			2.16848		1.89637	3.5757	3.06668
3.60715		4.53664	1.83084	4.82766		1.94688	3.41964
1.99988	1.56394		2.44003	2.36522	1.60657	3.28528	2.15656
4.00757	1.59432	10.4991	2.76203	2.16524	1.91811	5.62978	3.19967
2.40002	1.7845		3.56327	4.54565	1.62578	3.82024	1.79603
2.17776	1.49065	11.5145	3.66302	5.20217	2.11824		1.55112
1.72382	1.45012	7.10773	3.87194		1.52444	2.28735	2.67332
2.0773	3.13977	5.73064	3.20056	2.05927	1.42661	2.86198	3.01314
3.29382	2.3983	4.48933	2.27965	3.36182	1.71864		3.10899
2.34431	3.59145	3.73787	4.82486	1.93588	1.14243	3.60128	3.2653
2.02712	2.4969	5.31453	2.43794	2.47614	1.84011	7.04707	1.61513
1.72108	1.16231	10.0664	1.59179	2.84437	3.39431	6.73523	2.10575
1.29781	2.6409	5.3145	2.48925	3.23286	2.05178		3.63029
1.68093	2.51176	3.01103	3.2397	3.80846	1.39295	4.63846	2.01324
1.87757	2.67044	10.2493	1.6674	2.18724	2.5545		2.50401
1.47088	1.20231		2.51053	1.6785	2.17721	7.98299	2.25077
2.36724	1.41334	5.06174	2.22101	3.48652	1.74774	2.4807	1.84406
3.17944	2.06013	12.6832	2.74094	1.73051	1.96517	3.93681	1.63094
4.18389	1.77095	9.3909	1.68266		2.14032	2.75868	4.62997
2.94027	1.77376	5.07105		3.5868	1.47517	7.045	4.41178
2.24313	2.12819	4.30336	1.62214	2.41396	1.74503		4.56754
1.97008	2.63573	9.80048	3.62295	3.46765	1.31841	7.37032	4.45885
1.87637	1.60956	8.77397	2.58571		1.30659	2.896	1.95688
3.15582	1.2933			1.9021	1.11307		1.48205
1.46439			4.36655	4.28733	3.40486	6.24304	3.53418
1.08709	2.03706	3.3235	4.40895	1.78741	2.18135	4.53269	1.03897
	1.5822	4.71752	2.50757	7.39338	1.75328	3.02335	2.70404
3.3919	1.73727	3.6297		8.25478	1.65061	2.15834	3.83655
1.79961	3.02415	4.25861	1.58997	2.06824	2.07399	3.17944	5.97346
1.66685	1.40796	3.41265	2.29524	2.3963	2.18798	5.60335	3.45875
	1.18183	3.28324	5.64039	2.35339	1.87297	5.19791	3.00629
2.23202	1.64795	3.41919	1.51843	2.44204	2.76398	2.56163
1.7888	2.59448	3.0117	2.24457	4.47646	1.14376	4.41251	2.31498
2.96602	1.67949	3.42626	1.59495	3.23078	1.75451	7.20171	1.66747
1.58327	1.58108	4.46622	2.15594	1.87428	1.68791	3.42283	3.04925
2.08057	3.57272	9.35334	2.49771	4.5341	1.34511	2.88986	2.98086
4.85886	1.07437	3.91592	1.52809	4.38874	1.1572	2.45741	2.78541
2.87495	2.64359	9.57058		2.55072	2.51486	3.9989	2.37058
3.56283	1.89362	5.68209	5.45813	3.38682	1.2273	2.45011	1.99103
2.10029		3.49061	2.38588	6.60999	1.21478	3.68167	2.44205
	1.43336	5.41895	2.59361	2.54571	1.60349	4.33023	1.79962
5.05553	1.58119		3.18696	4.16558	1.92811	9.12051	1.33545
2.31668	1.17258	7.47929	1.99429	2.05574	1.3849	2.42311	2.41284
1.15597	2.25201		2.32933		1.31609	7.14496	2.17378
1.78751	1.45024	6.26129	1.66895		1.73185	3.04717	4.42006
1.8484	2.70674	5.03292	2.33947	3.06924	2.05154	3.71027	3.78693
1.5775	1.7444	3.36924	2.51343	8.12253	1.16653	3.45094	5.59454
2.55135	1.30514	8.04171	5.64334	3.48856	1.52247	2.76198	4.84396
2.25668	2.04822	3.36643	1.70483		3.16853	4.16332	2.27565
1.47166	1.70485	4.11752	3.24454	2.53231	1.26005
3.7687	3.24415	6.06287	2.78415		2.52221	3.39023	4.48679
1.45459	2.31134	3.58377	1.41383	3.64847	2.43939		7.23035
1.6716	1.36801	3.36195	2.9569	2.22556	1.19719	2.3995	1.2963
2.36085	1.25447		3.59482	4.20869	1.16163	3.4895	3.87292
2.8467	2.55092		1.66537	2.36994	2.20556	3.65605	2.2373
1.60794	1.64825	3.34814	1.85254	2.84858	1.22237	2.95177	3.21439
4.3596	2.54845	4.81774		4.01632	1.61675	2.59521	2.26037
1.68705	1.25426	3.96131	1.43384	2.21321		3.30275	4.53052
2.29805	2.1134	3.60784	1.45022	2.66744	1.79203		1.20831
3.03059	1.83804	11.0426	4.31062		1.62705	3.41551	1.5716
2.31441	2.58015	5.45776	1.54235	2.71117	1.55673	3.30306	2.44611
2.53892	2.70598	5.68635	1.71905	3.3492		3.44439	1.72798
5.15802	2.04729	3.62416	1.76178	2.77148	1.69159	7.02629	5.14273
2.60122	2.11763	5.00331	3.62758	4.82408	1.42283	3.64603	1.15775
1.62901	2.05667		2.02695	1.74609	2.66544	3.44337	1.94312
1.22902	1.60416	6.57001	2.89446	2.85288	1.93243	4.52328
2.14074	1.78255	5.31326	3.79711		1.4329	2.91341	1.13551
1.01446	2.44342	6.41895	1.6676	3.02766	1.50029	4.2169	3.77293
2.30532	1.27209	6.10446	3.18144	3.46384	2.85426	6.66992	4.76646
1.70595	1.79685	8.81284	2.24264	2.33408	1.61136	2.92369	1.75618
1.9059	2.50918	3.1869	2.62811	2.73352	1.13482	2.79855	6.55554
1.11448	1.83572	3.67894		2.24532	1.35476	3.63903	3.06175
3.215		4.64072	3.22847	1.72172	1.49421	2.89918	2.53572
3.87782	2.54187	8.71815		2.61848	2.07365	2.86681	1.69048
1.27288	3.31598	5.06949	2.88271	1.84479	1.94602	2.97762	2.68871
3.28365	1.38265	7.95883	2.20341		1.90479	3.47487	1.91892
2.98782	2.1027	5.23885	1.86217	4.85574	4.87573	4.49272	1.7749
1.85883	1.72841	2.24677		2.43549	1.78661	4.75443	2.94597
3.48242	1.41728	3.29831	2.51761	6.42256	2.61325	3.17517	3.48663
1.39035	1.7603	3.08784	3.7256	5.60031	2.7341	7.1636	2.27402
2.85071	2.08302	3.24486	3.85308		1.21771	2.84875	3.01645
1.45305	1.85944	4.81593	2.34983	2.91561	1.37404	6.95475	1.6897
2.18588	1.59778	5.52097	2.57859	3.14645	1.81985		3.76356
3.07274	1.55747	2.24753	2.52058	4.79828	1.4076	6.00252	2.27385
1.90427	2.10297	7.33485	3.64722	1.72278	3.58749	3.06608	5.72523
4.34011	2.68288	4.32906	4.6182	3.32004	2.10783	8.13715	4.08365
1.72544	1.59638	10.4717	2.59303	4.8295	1.51242	2.91283	1.6982
2.37753	1.56196	4.55034	1.58642	4.37486	2.70118	8.08169	2.99402
1.91746	1.50692		2.84079	2.85316	1.45503	4.46834	2.8484
1.34039	1.23726	5.7515	1.41974		2.6535	2.87561	2.42266
1.34858	2.12221	15.5094	2.9522	1.83684	1.80934	5.06381
2.40275	2.67827	6.14268	2.02377	2.89453	1.39155	3.10698	1.23196
[truncated: 6,056 more rows]

## Sheet: Figure 4G
Veh	Veh+I	HF	HF+I	3610	3610+I	0357	0357+I
[truncated: 6,586 more rows]

## Sheet: Figure 4H
Veh	Veh+I	HF	HF+I	3610	3610+I	0357	0357+I
[truncated: 6,631 more rows]
